# Supplementary material
Source: PubMed Central journal article supplement (PMC4479539)
Supplement: imm0145-0404-sd4.pdf [file imm0145-0404-sd4.pdf]

**Supplementary Table 2. Differentially expressed miRNAs and their potential targets identified by three prediction programs.**

| <b>microRNA</b> | <b>TargetScan predicted targets</b> | <b>MiRanda predicted targets</b> | <b>MicroCosm predicted targets</b> |
|-----------------|-------------------------------------|----------------------------------|------------------------------------|
| hsa-miR-106b*   | -                                   | ACADS                            | ACADS                              |
| hsa-miR-106b*   | -                                   | AIFM2                            | AIFM2                              |
| hsa-miR-106b*   | -                                   | AMT                              | AMT                                |
| hsa-miR-106b*   | -                                   | AP2A2                            | AP2A2                              |
| hsa-miR-106b*   | -                                   | ARHGAP17                         | ARHGAP17                           |
| hsa-miR-106b*   | -                                   | ARHGAP24                         | ARHGAP24                           |
| hsa-miR-106b*   | -                                   | ASCC2                            | ASCC2                              |
| hsa-miR-106b*   | -                                   | ATP6V0B                          | ATP6V0B                            |
| hsa-miR-106b*   | -                                   | ATP9B                            | ATP9B                              |
| hsa-miR-106b*   | -                                   | ATPAF2                           | ATPAF2                             |
| hsa-miR-106b*   | -                                   | C1QL2                            | C1QL2                              |
| hsa-miR-106b*   | -                                   | C1orf43                          | C1orf43                            |
| hsa-miR-106b*   | -                                   | C20orf26                         | C20orf26                           |
| hsa-miR-106b*   | -                                   | CAMK2D                           | CAMK2D                             |
| hsa-miR-106b*   | -                                   | CARD9                            | CARD9                              |
| hsa-miR-106b*   | -                                   | DNAJC4                           | DNAJC4                             |
| hsa-miR-106b*   | -                                   | DPP6                             | DPP6                               |
| hsa-miR-106b*   | -                                   | DTX2                             | DTX2                               |
| hsa-miR-106b*   | -                                   | DUSP8                            | DUSP8                              |
| hsa-miR-106b*   | -                                   | ECE2                             | ECE2                               |
| hsa-miR-106b*   | -                                   | EDA                              | EDA                                |
| hsa-miR-106b*   | -                                   | EDF1                             | EDF1                               |
| hsa-miR-106b*   | -                                   | ELMO3                            | ELMO3                              |
| hsa-miR-106b*   | -                                   | ELOVL5                           | ELOVL5                             |
| hsa-miR-106b*   | -                                   | FAM110B                          | FAM110B                            |
| hsa-miR-106b*   | -                                   | FAM22A                           | FAM22A                             |
| hsa-miR-106b*   | -                                   | FAM5C                            | FAM5C                              |
| hsa-miR-106b*   | -                                   | FARP2                            | FARP2                              |
| hsa-miR-106b*   | -                                   | FEZF2                            | FEZF2                              |
| hsa-miR-106b*   | -                                   | GAP43                            | GAP43                              |
| hsa-miR-106b*   | -                                   | GCDH                             | GCDH                               |
| hsa-miR-106b*   | -                                   | GFRA3                            | GFRA3                              |
| hsa-miR-106b*   | -                                   | GRIA1                            | GRIA1                              |
| hsa-miR-106b*   | -                                   | HOXB13                           | HOXB13                             |
| hsa-miR-106b*   | -                                   | HOXD9                            | HOXD9                              |
| hsa-miR-106b*   | -                                   | IDH2                             | IDH2                               |
| hsa-miR-106b*   | -                                   | IFI35                            | IFI35                              |
| hsa-miR-106b*   | -                                   | IFI6                             | IFI6                               |
| hsa-miR-106b*   | -                                   | ITGA3                            | ITGA3                              |
| hsa-miR-106b*   | -                                   | KCNE4                            | KCNE4                              |
| hsa-miR-106b*   | -                                   | KCNMA1                           | KCNMA1                             |
| hsa-miR-106b*   | -                                   | LRSAM1                           | LRSAM1                             |
| hsa-miR-106b*   | -                                   | MIB2                             | MIB2                               |

|               |          |          |         |
|---------------|----------|----------|---------|
| hsa-miR-106b* | -        | MICAL2   | MICAL2  |
| hsa-miR-106b* | -        | MRPS21   | MRPS21  |
| hsa-miR-106b* | -        | MRRF     | MRRF    |
| hsa-miR-106b* | -        | NCDN     | NCDN    |
| hsa-miR-106b* | -        | NDN      | NDN     |
| hsa-miR-106b* | -        | NKD2     | NKD2    |
| hsa-miR-106b* | -        | NTNG1    | NTNG1   |
| hsa-miR-106b* | -        | ODF2     | ODF2    |
| hsa-miR-106b* | -        | OLFM1    | OLFM1   |
| hsa-miR-106b* | -        | PANK2    | PANK2   |
| hsa-miR-106b* | -        | PFKP     | PFKP    |
| hsa-miR-106b* | -        | PITPNC1  | PITPNC1 |
| hsa-miR-106b* | -        | RBMS1    | RBMS1   |
| hsa-miR-106b* | -        | RNF212   | RNF212  |
| hsa-miR-106b* | -        | RRAD     | RRAD    |
| hsa-miR-106b* | -        | RTDR1    | RTDR1   |
| hsa-miR-106b* | -        | RUVBL1   | RUVBL1  |
| hsa-miR-106b* | -        | SH2D4B   | SH2D4B  |
| hsa-miR-106b* | -        | SH3GL3   | SH3GL3  |
| hsa-miR-106b* | -        | SPAG11A  | SPAG11A |
| hsa-miR-106b* | -        | SPAG11B  | SPAG11B |
| hsa-miR-106b* | -        | TBX3     | TBX3    |
| hsa-miR-106b* | -        | THOC3    | THOC3   |
| hsa-miR-106b* | -        | TMED9    | TMED9   |
| hsa-miR-106b* | -        | TMEM178  | TMEM178 |
| hsa-miR-106b* | -        | TMEM41B  | TMEM41B |
| hsa-miR-106b* | -        | WDR69    | WDR69   |
| hsa-miR-106b* | -        | ZNF182   | ZNF182  |
| hsa-miR-1244  | AASDHPPT | AASDHPPT | -       |
| hsa-miR-1244  | AASS     | AASS     | -       |
| hsa-miR-1244  | ABCD2    | ABCD2    | -       |
| hsa-miR-1244  | ABHD3    | ABHD3    | -       |
| hsa-miR-1244  | ABRA     | ABRA     | -       |
| hsa-miR-1244  | ACACA    | ACACA    | -       |
| hsa-miR-1244  | ACLY     | ACLY     | -       |
| hsa-miR-1244  | ACOX1    | ACOX1    | -       |
| hsa-miR-1244  | ACPL2    | ACPL2    | -       |
| hsa-miR-1244  | ACVR2A   | ACVR2A   | -       |
| hsa-miR-1244  | ADAL     | ADAL     | -       |
| hsa-miR-1244  | ADAM10   | ADAM10   | -       |
| hsa-miR-1244  | ADAM22   | ADAM22   | -       |
| hsa-miR-1244  | ADAM9    | ADAM9    | -       |
| hsa-miR-1244  | ADAMTS3  | ADAMTS3  | -       |
| hsa-miR-1244  | ADAMTS5  | ADAMTS5  | -       |
| hsa-miR-1244  | ADAMTS6  | ADAMTS6  | -       |
| hsa-miR-1244  | ADAMTSL1 | ADAMTSL1 | -       |
| hsa-miR-1244  | ADD3     | ADD3     | -       |
| hsa-miR-1244  | ADIPOQ   | ADIPOQ   | -       |
| hsa-miR-1244  | ADNP2    | ADNP2    | -       |
| hsa-miR-1244  | ADO      | ADO      | -       |
| hsa-miR-1244  | ADRB1    | ADRB1    | -       |

|              |           |           |   |
|--------------|-----------|-----------|---|
| hsa-miR-1244 | ADRBK2    | ADRBK2    | - |
| hsa-miR-1244 | AFF1      | AFF1      | - |
| hsa-miR-1244 | AGBL3     | AGBL3     | - |
| hsa-miR-1244 | AGFG1     | AGFG1     | - |
| hsa-miR-1244 | AGGF1     | AGGF1     | - |
| hsa-miR-1244 | AGL       | AGL       | - |
| hsa-miR-1244 | AGPAT3    | AGPAT3    | - |
| hsa-miR-1244 | AGPAT9    | AGPAT9    | - |
| hsa-miR-1244 | AGPS      | AGPS      | - |
| hsa-miR-1244 | AGTR1     | AGTR1     | - |
| hsa-miR-1244 | AKAP2     | AKAP2     | - |
| hsa-miR-1244 | ALDH8A1   | ALDH8A1   | - |
| hsa-miR-1244 | ALG10B    | ALG10B    | - |
| hsa-miR-1244 | ALG14     | ALG14     | - |
| hsa-miR-1244 | ALKBH8    | ALKBH8    | - |
| hsa-miR-1244 | ALOX12    | ALOX12    | - |
| hsa-miR-1244 | AMN1      | AMN1      | - |
| hsa-miR-1244 | AMOT      | AMOT      | - |
| hsa-miR-1244 | AMZ2      | AMZ2      | - |
| hsa-miR-1244 | ANAPC11   | ANAPC11   | - |
| hsa-miR-1244 | ANAPC13   | ANAPC13   | - |
| hsa-miR-1244 | ANGPT1    | ANGPT1    | - |
| hsa-miR-1244 | ANK2      | ANK2      | - |
| hsa-miR-1244 | ANKDD1A   | ANKDD1A   | - |
| hsa-miR-1244 | ANKRD12   | ANKRD12   | - |
| hsa-miR-1244 | ANKRD13A  | ANKRD13A  | - |
| hsa-miR-1244 | ANKRD13C  | ANKRD13C  | - |
| hsa-miR-1244 | ANKRD17   | ANKRD17   | - |
| hsa-miR-1244 | ANKRD28   | ANKRD28   | - |
| hsa-miR-1244 | ANKRD44   | ANKRD44   | - |
| hsa-miR-1244 | ANKRD45   | ANKRD45   | - |
| hsa-miR-1244 | ANKRD57   | ANKRD57   | - |
| hsa-miR-1244 | ANO5      | ANO5      | - |
| hsa-miR-1244 | ANXA3     | ANXA3     | - |
| hsa-miR-1244 | AOX1      | AOX1      | - |
| hsa-miR-1244 | AP3S2     | AP3S2     | - |
| hsa-miR-1244 | AP4S1     | AP4S1     | - |
| hsa-miR-1244 | APEX1     | APEX1     | - |
| hsa-miR-1244 | APLF      | APLF      | - |
| hsa-miR-1244 | ARHGAP20  | ARHGAP20  | - |
| hsa-miR-1244 | ARHGAP21  | ARHGAP21  | - |
| hsa-miR-1244 | ARHGEF10L | ARHGEF10L | - |
| hsa-miR-1244 | ARHGEF3   | ARHGEF3   | - |
| hsa-miR-1244 | ARID4B    | ARID4B    | - |
| hsa-miR-1244 | ARL1      | ARL1      | - |
| hsa-miR-1244 | ARL14     | ARL14     | - |
| hsa-miR-1244 | ARL17A    | ARL17A    | - |
| hsa-miR-1244 | ARL4A     | ARL4A     | - |
| hsa-miR-1244 | ARL4C     | ARL4C     | - |
| hsa-miR-1244 | ARL5B     | ARL5B     | - |
| hsa-miR-1244 | ARL6IP1   | ARL6IP1   | - |

|              |           |           |   |
|--------------|-----------|-----------|---|
| hsa-miR-1244 | ARMC8     | ARMC8     | - |
| hsa-miR-1244 | ARPP19    | ARPP19    | - |
| hsa-miR-1244 | ASAP2     | ASAP2     | - |
| hsa-miR-1244 | ASB3      | ASB3      | - |
| hsa-miR-1244 | ASH2L     | ASH2L     | - |
| hsa-miR-1244 | ATAD1     | ATAD1     | - |
| hsa-miR-1244 | ATM       | ATM       | - |
| hsa-miR-1244 | ATMIN     | ATMIN     | - |
| hsa-miR-1244 | ATP11A    | ATP11A    | - |
| hsa-miR-1244 | ATP4B     | ATP4B     | - |
| hsa-miR-1244 | ATP5F1    | ATP5F1    | - |
| hsa-miR-1244 | ATP5G3    | ATP5G3    | - |
| hsa-miR-1244 | ATP8A1    | ATP8A1    | - |
| hsa-miR-1244 | ATXN1L    | ATXN1L    | - |
| hsa-miR-1244 | ATXN3L    | ATXN3L    | - |
| hsa-miR-1244 | ATXN7     | ATXN7     | - |
| hsa-miR-1244 | AWAT2     | AWAT2     | - |
| hsa-miR-1244 | B3GNT1    | B3GNT1    | - |
| hsa-miR-1244 | B3GNT2    | B3GNT2    | - |
| hsa-miR-1244 | B4GALT6   | B4GALT6   | - |
| hsa-miR-1244 | BACE1     | BACE1     | - |
| hsa-miR-1244 | BCAN      | BCAN      | - |
| hsa-miR-1244 | BCAP29    | BCAP29    | - |
| hsa-miR-1244 | BCAR3     | BCAR3     | - |
| hsa-miR-1244 | BCL6      | BCL6      | - |
| hsa-miR-1244 | BCL7A     | BCL7A     | - |
| hsa-miR-1244 | BCLAF1    | BCLAF1    | - |
| hsa-miR-1244 | BDP1      | BDP1      | - |
| hsa-miR-1244 | BEND2     | BEND2     | - |
| hsa-miR-1244 | BEND4     | BEND4     | - |
| hsa-miR-1244 | BIRC6     | BIRC6     | - |
| hsa-miR-1244 | BPIL2     | BPIL2     | - |
| hsa-miR-1244 | BRAP      | BRAP      | - |
| hsa-miR-1244 | BRD4      | BRD4      | - |
| hsa-miR-1244 | BRIP1     | BRIP1     | - |
| hsa-miR-1244 | BRWD1     | BRWD1     | - |
| hsa-miR-1244 | BTN1A1    | BTN1A1    | - |
| hsa-miR-1244 | BTN3A1    | BTN3A1    | - |
| hsa-miR-1244 | BTNL3     | BTNL3     | - |
| hsa-miR-1244 | C10orf2   | C10orf2   | - |
| hsa-miR-1244 | C10orf26  | C10orf26  | - |
| hsa-miR-1244 | C10orf46  | C10orf46  | - |
| hsa-miR-1244 | C10orf53  | C10orf53  | - |
| hsa-miR-1244 | C10orf81  | C10orf81  | - |
| hsa-miR-1244 | C10orf88  | C10orf88  | - |
| hsa-miR-1244 | C12orf59  | C12orf59  | - |
| hsa-miR-1244 | C12orf60  | C12orf60  | - |
| hsa-miR-1244 | C12orf73  | C12orf73  | - |
| hsa-miR-1244 | C13orf34  | C13orf34  | - |
| hsa-miR-1244 | C13orf36  | C13orf36  | - |
| hsa-miR-1244 | C14orf101 | C14orf101 | - |



|              |           |           |   |
|--------------|-----------|-----------|---|
| hsa-miR-1244 | C14orf147 | C14orf147 | - |
| hsa-miR-1244 | C14orf50  | C14orf50  | - |
| hsa-miR-1244 | C15orf24  | C15orf24  | - |
| hsa-miR-1244 | C15orf29  | C15orf29  | - |
| hsa-miR-1244 | C17orf57  | C17orf57  | - |
| hsa-miR-1244 | C18orf26  | C18orf26  | - |
| hsa-miR-1244 | C18orf54  | C18orf54  | - |
| hsa-miR-1244 | C21orf91  | C21orf91  | - |
| hsa-miR-1244 | C22orf40  | C22orf40  | - |
| hsa-miR-1244 | C2orf47   | C2orf47   | - |
| hsa-miR-1244 | C3orf23   | C3orf23   | - |
| hsa-miR-1244 | C3orf35   | C3orf35   | - |
| hsa-miR-1244 | C3orf52   | C3orf52   | - |
| hsa-miR-1244 | C3orf58   | C3orf58   | - |
| hsa-miR-1244 | C3orf63   | C3orf63   | - |
| hsa-miR-1244 | C3orf70   | C3orf70   | - |
| hsa-miR-1244 | C4orf39   | C4orf39   | - |
| hsa-miR-1244 | C4orf40   | C4orf40   | - |
| hsa-miR-1244 | C5orf4    | C5orf4    | - |
| hsa-miR-1244 | C5orf42   | C5orf42   | - |
| hsa-miR-1244 | C6orf162  | C6orf162  | - |
| hsa-miR-1244 | C6orf204  | C6orf204  | - |
| hsa-miR-1244 | C7orf29   | C7orf29   | - |
| hsa-miR-1244 | C7orf60   | C7orf60   | - |
| hsa-miR-1244 | C8orf45   | C8orf45   | - |
| hsa-miR-1244 | C8orf84   | C8orf84   | - |
| hsa-miR-1244 | C9        | C9        | - |
| hsa-miR-1244 | C9orf30   | C9orf30   | - |
| hsa-miR-1244 | C9orf57   | C9orf57   | - |
| hsa-miR-1244 | C9orf6    | C9orf6    | - |
| hsa-miR-1244 | C9orf72   | C9orf72   | - |
| hsa-miR-1244 | C9orf80   | C9orf80   | - |
| hsa-miR-1244 | CACNB4    | CACNB4    | - |
| hsa-miR-1244 | CADM3     | CADM3     | - |
| hsa-miR-1244 | CADPS     | CADPS     | - |
| hsa-miR-1244 | CADPS2    | CADPS2    | - |
| hsa-miR-1244 | CALB1     | CALB1     | - |
| hsa-miR-1244 | CALCRL    | CALCRL    | - |
| hsa-miR-1244 | CALM1     | CALM1     | - |
| hsa-miR-1244 | CAMK4     | CAMK4     | - |
| hsa-miR-1244 | CANX      | CANX      | - |
| hsa-miR-1244 | CAPRIN1   | CAPRIN1   | - |
| hsa-miR-1244 | CBFB      | CBFB      | - |
| hsa-miR-1244 | CC2D1B    | CC2D1B    | - |
| hsa-miR-1244 | CCDC144A  | CCDC144A  | - |
| hsa-miR-1244 | CCDC146   | CCDC146   | - |
| hsa-miR-1244 | CCDC3     | CCDC3     | - |
| hsa-miR-1244 | CCDC6     | CCDC6     | - |
| hsa-miR-1244 | CCDC85C   | CCDC85C   | - |
| hsa-miR-1244 | CCDC88C   | CCDC88C   | - |
| hsa-miR-1244 | CCNE2     | CCNE2     | - |

|              |          |          |   |
|--------------|----------|----------|---|
| hsa-miR-1244 | CCNY     | CCNY     | - |
| hsa-miR-1244 | CCPG1    | CCPG1    | - |
| hsa-miR-1244 | CCT6B    | CCT6B    | - |
| hsa-miR-1244 | CD1C     | CD1C     | - |
| hsa-miR-1244 | CD1D     | CD1D     | - |
| hsa-miR-1244 | CD28     | CD28     | - |
| hsa-miR-1244 | CD300LG  | CD300LG  | - |
| hsa-miR-1244 | CD47     | CD47     | - |
| hsa-miR-1244 | CDC14A   | CDC14A   | - |
| hsa-miR-1244 | CDC34    | CDC34    | - |
| hsa-miR-1244 | CDC42EP3 | CDC42EP3 | - |
| hsa-miR-1244 | CDC42SE2 | CDC42SE2 | - |
| hsa-miR-1244 | CDCP2    | CDCP2    | - |
| hsa-miR-1244 | CDH6     | CDH6     | - |
| hsa-miR-1244 | CDK1     | CDK1     | - |
| hsa-miR-1244 | CDK17    | CDK17    | - |
| hsa-miR-1244 | CDKL2    | CDKL2    | - |
| hsa-miR-1244 | CDYL     | CDYL     | - |
| hsa-miR-1244 | CEP97    | CEP97    | - |
| hsa-miR-1244 | CER1     | CER1     | - |
| hsa-miR-1244 | CFHR3    | CFHR3    | - |
| hsa-miR-1244 | CFLAR    | CFLAR    | - |
| hsa-miR-1244 | CHL1     | CHL1     | - |
| hsa-miR-1244 | CHMP5    | CHMP5    | - |
| hsa-miR-1244 | CHORDC1  | CHORDC1  | - |
| hsa-miR-1244 | CHRNA3   | CHRNA3   | - |
| hsa-miR-1244 | CHSY3    | CHSY3    | - |
| hsa-miR-1244 | CHUK     | CHUK     | - |
| hsa-miR-1244 | CISD2    | CISD2    | - |
| hsa-miR-1244 | CLASP2   | CLASP2   | - |
| hsa-miR-1244 | CLCN3    | CLCN3    | - |
| hsa-miR-1244 | CLEC2D   | CLEC2D   | - |
| hsa-miR-1244 | CLEC5A   | CLEC5A   | - |
| hsa-miR-1244 | CMTM6    | CMTM6    | - |
| hsa-miR-1244 | CNIH2    | CNIH2    | - |
| hsa-miR-1244 | CNNM1    | CNNM1    | - |
| hsa-miR-1244 | CNOT1    | CNOT1    | - |
| hsa-miR-1244 | CNOT6L   | CNOT6L   | - |
| hsa-miR-1244 | CNOT7    | CNOT7    | - |
| hsa-miR-1244 | CNTLN    | CNTLN    | - |
| hsa-miR-1244 | CNTN4    | CNTN4    | - |
| hsa-miR-1244 | CNTNAP2  | CNTNAP2  | - |
| hsa-miR-1244 | CNTNAP5  | CNTNAP5  | - |
| hsa-miR-1244 | COBL     | COBL     | - |
| hsa-miR-1244 | COBLL1   | COBLL1   | - |
| hsa-miR-1244 | COG5     | COG5     | - |
| hsa-miR-1244 | COG7     | COG7     | - |
| hsa-miR-1244 | COL12A1  | COL12A1  | - |
| hsa-miR-1244 | COL19A1  | COL19A1  | - |
| hsa-miR-1244 | COL21A1  | COL21A1  | - |
| hsa-miR-1244 | COL4A1   | COL4A1   | - |

|              |          |          |   |
|--------------|----------|----------|---|
| hsa-miR-1244 | COL6A6   | COL6A6   | - |
| hsa-miR-1244 | COMMD2   | COMMD2   | - |
| hsa-miR-1244 | COPS2    | COPS2    | - |
| hsa-miR-1244 | CPD      | CPD      | - |
| hsa-miR-1244 | CPEB1    | CPEB1    | - |
| hsa-miR-1244 | CPEB3    | CPEB3    | - |
| hsa-miR-1244 | CPSF2    | CPSF2    | - |
| hsa-miR-1244 | CPXCR1   | CPXCR1   | - |
| hsa-miR-1244 | CRBN     | CRBN     | - |
| hsa-miR-1244 | CREB5    | CREB5    | - |
| hsa-miR-1244 | CREBBP   | CREBBP   | - |
| hsa-miR-1244 | CREBZF   | CREBZF   | - |
| hsa-miR-1244 | CRIM1    | CRIM1    | - |
| hsa-miR-1244 | CRK      | CRK      | - |
| hsa-miR-1244 | CSNK1A1  | CSNK1A1  | - |
| hsa-miR-1244 | CSPP1    | CSPP1    | - |
| hsa-miR-1244 | CSRP2    | CSRP2    | - |
| hsa-miR-1244 | CTAGE1   | CTAGE1   | - |
| hsa-miR-1244 | CTCFL    | CTCFL    | - |
| hsa-miR-1244 | CTPS2    | CTPS2    | - |
| hsa-miR-1244 | CTSL2    | CTSL2    | - |
| hsa-miR-1244 | CTSO     | CTSO     | - |
| hsa-miR-1244 | CTXN2    | CTXN2    | - |
| hsa-miR-1244 | CUL4B    | CUL4B    | - |
| hsa-miR-1244 | CUL5     | CUL5     | - |
| hsa-miR-1244 | CXCL12   | CXCL12   | - |
| hsa-miR-1244 | CXCL16   | CXCL16   | - |
| hsa-miR-1244 | CXorf23  | CXorf23  | - |
| hsa-miR-1244 | CYB5A    | CYB5A    | - |
| hsa-miR-1244 | CYP11B1  | CYP11B1  | - |
| hsa-miR-1244 | CYP1B1   | CYP1B1   | - |
| hsa-miR-1244 | CYP26B1  | CYP26B1  | - |
| hsa-miR-1244 | CYP4X1   | CYP4X1   | - |
| hsa-miR-1244 | CYP7B1   | CYP7B1   | - |
| hsa-miR-1244 | CYSLTR2  | CYSLTR2  | - |
| hsa-miR-1244 | CYorf15B | CYorf15B | - |
| hsa-miR-1244 | DAPK1    | DAPK1    | - |
| hsa-miR-1244 | DAPP1    | DAPP1    | - |
| hsa-miR-1244 | DARS     | DARS     | - |
| hsa-miR-1244 | DBF4B    | DBF4B    | - |
| hsa-miR-1244 | DBR1     | DBR1     | - |
| hsa-miR-1244 | DCAF16   | DCAF16   | - |
| hsa-miR-1244 | DCAF17   | DCAF17   | - |
| hsa-miR-1244 | DCAF8    | DCAF8    | - |
| hsa-miR-1244 | DCBLD2   | DCBLD2   | - |
| hsa-miR-1244 | DCK      | DCK      | - |
| hsa-miR-1244 | DCLK1    | DCLK1    | - |
| hsa-miR-1244 | DCLK3    | DCLK3    | - |
| hsa-miR-1244 | DCUN1D3  | DCUN1D3  | - |
| hsa-miR-1244 | DCUN1D4  | DCUN1D4  | - |
| hsa-miR-1244 | DDX21    | DDX21    | - |

|              |         |         |   |
|--------------|---------|---------|---|
| hsa-miR-1244 | DDX60   | DDX60   | - |
| hsa-miR-1244 | DENND1B | DENND1B | - |
| hsa-miR-1244 | DENND4C | DENND4C | - |
| hsa-miR-1244 | DENND5B | DENND5B | - |
| hsa-miR-1244 | DGKE    | DGKE    | - |
| hsa-miR-1244 | DHFR    | DHFR    | - |
| hsa-miR-1244 | DHFRL1  | DHFRL1  | - |
| hsa-miR-1244 | DIRC2   | DIRC2   | - |
| hsa-miR-1244 | DIS3    | DIS3    | - |
| hsa-miR-1244 | DISC1   | DISC1   | - |
| hsa-miR-1244 | DIXDC1  | DIXDC1  | - |
| hsa-miR-1244 | DKK3    | DKK3    | - |
| hsa-miR-1244 | DLGAP2  | DLGAP2  | - |
| hsa-miR-1244 | DLL4    | DLL4    | - |
| hsa-miR-1244 | DMD     | DMD     | - |
| hsa-miR-1244 | DNAJA4  | DNAJA4  | - |
| hsa-miR-1244 | DNAJB4  | DNAJB4  | - |
| hsa-miR-1244 | DNAJC15 | DNAJC15 | - |
| hsa-miR-1244 | DNAJC18 | DNAJC18 | - |
| hsa-miR-1244 | DNAJC3  | DNAJC3  | - |
| hsa-miR-1244 | DNM3    | DNM3    | - |
| hsa-miR-1244 | DNMT3A  | DNMT3A  | - |
| hsa-miR-1244 | DOK5    | DOK5    | - |
| hsa-miR-1244 | DPF3    | DPF3    | - |
| hsa-miR-1244 | DPH3    | DPH3    | - |
| hsa-miR-1244 | DPPA4   | DPPA4   | - |
| hsa-miR-1244 | DPY19L4 | DPY19L4 | - |
| hsa-miR-1244 | DSC1    | DSC1    | - |
| hsa-miR-1244 | DSCC1   | DSCC1   | - |
| hsa-miR-1244 | DTD1    | DTD1    | - |
| hsa-miR-1244 | DTNA    | DTNA    | - |
| hsa-miR-1244 | DYNC1I1 | DYNC1I1 | - |
| hsa-miR-1244 | DZIP3   | DZIP3   | - |
| hsa-miR-1244 | E2F3    | E2F3    | - |
| hsa-miR-1244 | EBF1    | EBF1    | - |
| hsa-miR-1244 | EBF2    | EBF2    | - |
| hsa-miR-1244 | ECHDC1  | ECHDC1  | - |
| hsa-miR-1244 | ECT2L   | ECT2L   | - |
| hsa-miR-1244 | EDDM3A  | EDDM3A  | - |
| hsa-miR-1244 | EDEM3   | EDEM3   | - |
| hsa-miR-1244 | EEA1    | EEA1    | - |
| hsa-miR-1244 | EEF1E1  | EEF1E1  | - |
| hsa-miR-1244 | EFCAB1  | EFCAB1  | - |
| hsa-miR-1244 | EFCAB3  | EFCAB3  | - |
| hsa-miR-1244 | EFR3A   | EFR3A   | - |
| hsa-miR-1244 | EHF     | EHF     | - |
| hsa-miR-1244 | EID1    | EID1    | - |
| hsa-miR-1244 | EIF1AX  | EIF1AX  | - |
| hsa-miR-1244 | EIF2A   | EIF2A   | - |
| hsa-miR-1244 | EIF2S3  | EIF2S3  | - |
| hsa-miR-1244 | EIF3J   | EIF3J   | - |

|              |         |         |   |
|--------------|---------|---------|---|
| hsa-miR-1244 | EIF4E3  | EIF4E3  | - |
| hsa-miR-1244 | ELF2    | ELF2    | - |
| hsa-miR-1244 | ELTD1   | ELTD1   | - |
| hsa-miR-1244 | EMB     | EMB     | - |
| hsa-miR-1244 | EMCN    | EMCN    | - |
| hsa-miR-1244 | EML1    | EML1    | - |
| hsa-miR-1244 | EML4    | EML4    | - |
| hsa-miR-1244 | ENOPH1  | ENOPH1  | - |
| hsa-miR-1244 | ENTPD1  | ENTPD1  | - |
| hsa-miR-1244 | EPHA3   | EPHA3   | - |
| hsa-miR-1244 | EPHA5   | EPHA5   | - |
| hsa-miR-1244 | ERBB2IP | ERBB2IP | - |
| hsa-miR-1244 | ERBB4   | ERBB4   | - |
| hsa-miR-1244 | ERCC4   | ERCC4   | - |
| hsa-miR-1244 | ERLIN2  | ERLIN2  | - |
| hsa-miR-1244 | ESYT3   | ESYT3   | - |
| hsa-miR-1244 | ETS1    | ETS1    | - |
| hsa-miR-1244 | EVI5    | EVI5    | - |
| hsa-miR-1244 | EXD2    | EXD2    | - |
| hsa-miR-1244 | EXOC1   | EXOC1   | - |
| hsa-miR-1244 | EXOC4   | EXOC4   | - |
| hsa-miR-1244 | EYA1    | EYA1    | - |
| hsa-miR-1244 | F3      | F3      | - |
| hsa-miR-1244 | F8      | F8      | - |
| hsa-miR-1244 | FADS1   | FADS1   | - |
| hsa-miR-1244 | FAM102B | FAM102B | - |
| hsa-miR-1244 | FAM104B | FAM104B | - |
| hsa-miR-1244 | FAM110B | FAM110B | - |
| hsa-miR-1244 | FAM116A | FAM116A | - |
| hsa-miR-1244 | FAM120A | FAM120A | - |
| hsa-miR-1244 | FAM122A | FAM122A | - |
| hsa-miR-1244 | FAM122B | FAM122B | - |
| hsa-miR-1244 | FAM133A | FAM133A | - |
| hsa-miR-1244 | FAM168A | FAM168A | - |
| hsa-miR-1244 | FAM172A | FAM172A | - |
| hsa-miR-1244 | FAM175B | FAM175B | - |
| hsa-miR-1244 | FAM180A | FAM180A | - |
| hsa-miR-1244 | FAM188A | FAM188A | - |
| hsa-miR-1244 | FAM18B2 | FAM18B2 | - |
| hsa-miR-1244 | FAM190A | FAM190A | - |
| hsa-miR-1244 | FAM192A | FAM192A | - |
| hsa-miR-1244 | FAM198B | FAM198B | - |
| hsa-miR-1244 | FAM199X | FAM199X | - |
| hsa-miR-1244 | FAM19A1 | FAM19A1 | - |
| hsa-miR-1244 | FAM45A  | FAM45A  | - |
| hsa-miR-1244 | FAM46D  | FAM46D  | - |
| hsa-miR-1244 | FAM53B  | FAM53B  | - |
| hsa-miR-1244 | FAM55C  | FAM55C  | - |
| hsa-miR-1244 | FAM71D  | FAM71D  | - |
| hsa-miR-1244 | FAM76B  | FAM76B  | - |
| hsa-miR-1244 | FAM83D  | FAM83D  | - |

|              |          |          |   |
|--------------|----------|----------|---|
| hsa-miR-1244 | FAM84B   | FAM84B   | - |
| hsa-miR-1244 | FAM98A   | FAM98A   | - |
| hsa-miR-1244 | FAT1     | FAT1     | - |
| hsa-miR-1244 | FBXO11   | FBXO11   | - |
| hsa-miR-1244 | FBXO22   | FBXO22   | - |
| hsa-miR-1244 | FBXO25   | FBXO25   | - |
| hsa-miR-1244 | FBXO28   | FBXO28   | - |
| hsa-miR-1244 | FBXO45   | FBXO45   | - |
| hsa-miR-1244 | FCHO2    | FCHO2    | - |
| hsa-miR-1244 | FDX1     | FDX1     | - |
| hsa-miR-1244 | FERMT2   | FERMT2   | - |
| hsa-miR-1244 | FGF7     | FGF7     | - |
| hsa-miR-1244 | FGFBP2   | FGFBP2   | - |
| hsa-miR-1244 | FGFR1OP2 | FGFR1OP2 | - |
| hsa-miR-1244 | FKBP9    | FKBP9    | - |
| hsa-miR-1244 | FKTN     | FKTN     | - |
| hsa-miR-1244 | FLRT2    | FLRT2    | - |
| hsa-miR-1244 | FLT4     | FLT4     | - |
| hsa-miR-1244 | FMO2     | FMO2     | - |
| hsa-miR-1244 | FMR1     | FMR1     | - |
| hsa-miR-1244 | FNDC3B   | FNDC3B   | - |
| hsa-miR-1244 | FNTB     | FNTB     | - |
| hsa-miR-1244 | FOS      | FOS      | - |
| hsa-miR-1244 | FOXM1    | FOXM1    | - |
| hsa-miR-1244 | FOXN3    | FOXN3    | - |
| hsa-miR-1244 | FOXP1    | FOXP1    | - |
| hsa-miR-1244 | FOXP2    | FOXP2    | - |
| hsa-miR-1244 | FOXP3    | FOXP3    | - |
| hsa-miR-1244 | FPR2     | FPR2     | - |
| hsa-miR-1244 | FSCN3    | FSCN3    | - |
| hsa-miR-1244 | FUT11    | FUT11    | - |
| hsa-miR-1244 | FXR1     | FXR1     | - |
| hsa-miR-1244 | FZD4     | FZD4     | - |
| hsa-miR-1244 | G3BP2    | G3BP2    | - |
| hsa-miR-1244 | GAB1     | GAB1     | - |
| hsa-miR-1244 | GABRB3   | GABRB3   | - |
| hsa-miR-1244 | GABRE    | GABRE    | - |
| hsa-miR-1244 | GALC     | GALC     | - |
| hsa-miR-1244 | GALK2    | GALK2    | - |
| hsa-miR-1244 | GALNT13  | GALNT13  | - |
| hsa-miR-1244 | GALNT3   | GALNT3   | - |
| hsa-miR-1244 | GALNT7   | GALNT7   | - |
| hsa-miR-1244 | GARS     | GARS     | - |
| hsa-miR-1244 | GCC1     | GCC1     | - |
| hsa-miR-1244 | GCLM     | GCLM     | - |
| hsa-miR-1244 | GCNT2    | GCNT2    | - |
| hsa-miR-1244 | GCSH     | GCSH     | - |
| hsa-miR-1244 | GDF9     | GDF9     | - |
| hsa-miR-1244 | GDPD4    | GDPD4    | - |
| hsa-miR-1244 | GFPT1    | GFPT1    | - |
| hsa-miR-1244 | GFRA3    | GFRA3    | - |

|              |         |         |   |
|--------------|---------|---------|---|
| hsa-miR-1244 | GIMAP2  | GIMAP2  | - |
| hsa-miR-1244 | GIPC2   | GIPC2   | - |
| hsa-miR-1244 | GIT2    | GIT2    | - |
| hsa-miR-1244 | GJB2    | GJB2    | - |
| hsa-miR-1244 | GLRA2   | GLRA2   | - |
| hsa-miR-1244 | GLRA3   | GLRA3   | - |
| hsa-miR-1244 | GLT8D2  | GLT8D2  | - |
| hsa-miR-1244 | GLUD1   | GLUD1   | - |
| hsa-miR-1244 | GNA12   | GNA12   | - |
| hsa-miR-1244 | GNA13   | GNA13   | - |
| hsa-miR-1244 | GNAL    | GNAL    | - |
| hsa-miR-1244 | GNG12   | GNG12   | - |
| hsa-miR-1244 | GNGT1   | GNGT1   | - |
| hsa-miR-1244 | GNL3L   | GNL3L   | - |
| hsa-miR-1244 | GNPTAB  | GNPTAB  | - |
| hsa-miR-1244 | GOLGA1  | GOLGA1  | - |
| hsa-miR-1244 | GPBP1L1 | GPBP1L1 | - |
| hsa-miR-1244 | GPC6    | GPC6    | - |
| hsa-miR-1244 | GPD1L   | GPD1L   | - |
| hsa-miR-1244 | GPD2    | GPD2    | - |
| hsa-miR-1244 | GPHN    | GPHN    | - |
| hsa-miR-1244 | GPM6A   | GPM6A   | - |
| hsa-miR-1244 | GPR12   | GPR12   | - |
| hsa-miR-1244 | GPR126  | GPR126  | - |
| hsa-miR-1244 | GPR137C | GPR137C | - |
| hsa-miR-1244 | GPR160  | GPR160  | - |
| hsa-miR-1244 | GPR18   | GPR18   | - |
| hsa-miR-1244 | GPR37   | GPR37   | - |
| hsa-miR-1244 | GPR85   | GPR85   | - |
| hsa-miR-1244 | GPRIN3  | GPRIN3  | - |
| hsa-miR-1244 | GPX8    | GPX8    | - |
| hsa-miR-1244 | GRHL3   | GRHL3   | - |
| hsa-miR-1244 | GRIA1   | GRIA1   | - |
| hsa-miR-1244 | GRIA4   | GRIA4   | - |
| hsa-miR-1244 | GRIK2   | GRIK2   | - |
| hsa-miR-1244 | GRIN3A  | GRIN3A  | - |
| hsa-miR-1244 | GRM5    | GRM5    | - |
| hsa-miR-1244 | GUCY1B3 | GUCY1B3 | - |
| hsa-miR-1244 | GUF1    | GUF1    | - |
| hsa-miR-1244 | GZF1    | GZF1    | - |
| hsa-miR-1244 | H2AFJ   | H2AFJ   | - |
| hsa-miR-1244 | H2AFY2  | H2AFY2  | - |
| hsa-miR-1244 | HAND2   | HAND2   | - |
| hsa-miR-1244 | HBB     | HBB     | - |
| hsa-miR-1244 | HBXIP   | HBXIP   | - |
| hsa-miR-1244 | HDAC4   | HDAC4   | - |
| hsa-miR-1244 | HEATR1  | HEATR1  | - |
| hsa-miR-1244 | HEBP2   | HEBP2   | - |
| hsa-miR-1244 | HECTD2  | HECTD2  | - |
| hsa-miR-1244 | HEPH    | HEPH    | - |
| hsa-miR-1244 | HERPUD2 | HERPUD2 | - |

|              |          |          |   |
|--------------|----------|----------|---|
| hsa-miR-1244 | HGF      | HGF      | - |
| hsa-miR-1244 | HHAT     | HHAT     | - |
| hsa-miR-1244 | HHIPL1   | HHIPL1   | - |
| hsa-miR-1244 | HIAT1    | HIAT1    | - |
| hsa-miR-1244 | HINT3    | HINT3    | - |
| hsa-miR-1244 | HLA-DPA1 | HLA-DPA1 | - |
| hsa-miR-1244 | HLCS     | HLCS     | - |
| hsa-miR-1244 | HLTF     | HLTF     | - |
| hsa-miR-1244 | HMGA2    | HMGA2    | - |
| hsa-miR-1244 | HMGCLL1  | HMGCLL1  | - |
| hsa-miR-1244 | HMGXB4   | HMGXB4   | - |
| hsa-miR-1244 | HNF1B    | HNF1B    | - |
| hsa-miR-1244 | HNRNPH3  | HNRNPH3  | - |
| hsa-miR-1244 | HSBP1    | HSBP1    | - |
| hsa-miR-1244 | HSD17B6  | HSD17B6  | - |
| hsa-miR-1244 | HSF5     | HSF5     | - |
| hsa-miR-1244 | HSP90AA1 | HSP90AA1 | - |
| hsa-miR-1244 | HSPD1    | HSPD1    | - |
| hsa-miR-1244 | HTR5A    | HTR5A    | - |
| hsa-miR-1244 | HVCN1    | HVCN1    | - |
| hsa-miR-1244 | HYAL3    | HYAL3    | - |
| hsa-miR-1244 | ICK      | ICK      | - |
| hsa-miR-1244 | IFFO2    | IFFO2    | - |
| hsa-miR-1244 | IGDCC3   | IGDCC3   | - |
| hsa-miR-1244 | IGFBP1   | IGFBP1   | - |
| hsa-miR-1244 | IL13RA1  | IL13RA1  | - |
| hsa-miR-1244 | IL1RL1   | IL1RL1   | - |
| hsa-miR-1244 | IL20RB   | IL20RB   | - |
| hsa-miR-1244 | IL33     | IL33     | - |
| hsa-miR-1244 | ILDR2    | ILDR2    | - |
| hsa-miR-1244 | IMPA1    | IMPA1    | - |
| hsa-miR-1244 | IMPG1    | IMPG1    | - |
| hsa-miR-1244 | IMPG2    | IMPG2    | - |
| hsa-miR-1244 | INHBC    | INHBC    | - |
| hsa-miR-1244 | INPP4B   | INPP4B   | - |
| hsa-miR-1244 | INSIG2   | INSIG2   | - |
| hsa-miR-1244 | IPO7     | IPO7     | - |
| hsa-miR-1244 | IRAK4    | IRAK4    | - |
| hsa-miR-1244 | ITGA3    | ITGA3    | - |
| hsa-miR-1244 | ITGA4    | ITGA4    | - |
| hsa-miR-1244 | ITGAV    | ITGAV    | - |
| hsa-miR-1244 | ITGB6    | ITGB6    | - |
| hsa-miR-1244 | ITGB8    | ITGB8    | - |
| hsa-miR-1244 | ITM2A    | ITM2A    | - |
| hsa-miR-1244 | ITPK1    | ITPK1    | - |
| hsa-miR-1244 | JAK2     | JAK2     | - |
| hsa-miR-1244 | JAM2     | JAM2     | - |
| hsa-miR-1244 | JOSD1    | JOSD1    | - |
| hsa-miR-1244 | JRKL     | JRKL     | - |
| hsa-miR-1244 | KAT2B    | KAT2B    | - |
| hsa-miR-1244 | KCMF1    | KCMF1    | - |



|              |          |          |   |
|--------------|----------|----------|---|
| hsa-miR-1244 | KCNAB1   | KCNAB1   | - |
| hsa-miR-1244 | KCNE4    | KCNE4    | - |
| hsa-miR-1244 | KCNH8    | KCNH8    | - |
| hsa-miR-1244 | KCNIP4   | KCNIP4   | - |
| hsa-miR-1244 | KCNJ13   | KCNJ13   | - |
| hsa-miR-1244 | KCNJ14   | KCNJ14   | - |
| hsa-miR-1244 | KCNMA1   | KCNMA1   | - |
| hsa-miR-1244 | KCNN2    | KCNN2    | - |
| hsa-miR-1244 | KCTD16   | KCTD16   | - |
| hsa-miR-1244 | KCTD7    | KCTD7    | - |
| hsa-miR-1244 | KDM1B    | KDM1B    | - |
| hsa-miR-1244 | KDM3A    | KDM3A    | - |
| hsa-miR-1244 | KHDRBS3  | KHDRBS3  | - |
| hsa-miR-1244 | KIAA0040 | KIAA0040 | - |
| hsa-miR-1244 | KIAA0090 | KIAA0090 | - |
| hsa-miR-1244 | KIAA0355 | KIAA0355 | - |
| hsa-miR-1244 | KIAA0494 | KIAA0494 | - |
| hsa-miR-1244 | KIAA1217 | KIAA1217 | - |
| hsa-miR-1244 | KIAA1239 | KIAA1239 | - |
| hsa-miR-1244 | KIAA1244 | KIAA1244 | - |
| hsa-miR-1244 | KIAA1274 | KIAA1274 | - |
| hsa-miR-1244 | KIAA1370 | KIAA1370 | - |
| hsa-miR-1244 | KIAA1377 | KIAA1377 | - |
| hsa-miR-1244 | KIAA1524 | KIAA1524 | - |
| hsa-miR-1244 | KIF1B    | KIF1B    | - |
| hsa-miR-1244 | KIF3A    | KIF3A    | - |
| hsa-miR-1244 | KIF4A    | KIF4A    | - |
| hsa-miR-1244 | KIF5B    | KIF5B    | - |
| hsa-miR-1244 | KLF6     | KLF6     | - |
| hsa-miR-1244 | KLHL15   | KLHL15   | - |
| hsa-miR-1244 | KLHL3    | KLHL3    | - |
| hsa-miR-1244 | KLHL4    | KLHL4    | - |
| hsa-miR-1244 | KLHL6    | KLHL6    | - |
| hsa-miR-1244 | KLHL7    | KLHL7    | - |
| hsa-miR-1244 | KPNA1    | KPNA1    | - |
| hsa-miR-1244 | KPNA3    | KPNA3    | - |
| hsa-miR-1244 | KRT10    | KRT10    | - |
| hsa-miR-1244 | KRT12    | KRT12    | - |
| hsa-miR-1244 | KRT31    | KRT31    | - |
| hsa-miR-1244 | KRT4     | KRT4     | - |
| hsa-miR-1244 | KRT71    | KRT71    | - |
| hsa-miR-1244 | LAGE3    | LAGE3    | - |
| hsa-miR-1244 | LAMA4    | LAMA4    | - |
| hsa-miR-1244 | LARGE    | LARGE    | - |
| hsa-miR-1244 | LARP4    | LARP4    | - |
| hsa-miR-1244 | LAYN     | LAYN     | - |
| hsa-miR-1244 | LBH      | LBH      | - |
| hsa-miR-1244 | LCLAT1   | LCLAT1   | - |
| hsa-miR-1244 | LDB3     | LDB3     | - |
| hsa-miR-1244 | LGR4     | LGR4     | - |
| hsa-miR-1244 | LGSN     | LGSN     | - |

|              |          |          |   |
|--------------|----------|----------|---|
| hsa-miR-1244 | LHFPL2   | LHFPL2   | - |
| hsa-miR-1244 | LIN28B   | LIN28B   | - |
| hsa-miR-1244 | LIX1     | LIX1     | - |
| hsa-miR-1244 | LMLN     | LMLN     | - |
| hsa-miR-1244 | LMO3     | LMO3     | - |
| hsa-miR-1244 | LMOD3    | LMOD3    | - |
| hsa-miR-1244 | LNX1     | LNX1     | - |
| hsa-miR-1244 | LOX      | LOX      | - |
| hsa-miR-1244 | LPCAT2   | LPCAT2   | - |
| hsa-miR-1244 | LPCAT3   | LPCAT3   | - |
| hsa-miR-1244 | LPIN2    | LPIN2    | - |
| hsa-miR-1244 | LPP      | LPP      | - |
| hsa-miR-1244 | LRIT3    | LRIT3    | - |
| hsa-miR-1244 | LRP4     | LRP4     | - |
| hsa-miR-1244 | LRRC19   | LRRC19   | - |
| hsa-miR-1244 | LRRC8B   | LRRC8B   | - |
| hsa-miR-1244 | LRRFIP2  | LRRFIP2  | - |
| hsa-miR-1244 | LRRTM4   | LRRTM4   | - |
| hsa-miR-1244 | LSM1     | LSM1     | - |
| hsa-miR-1244 | LSM12    | LSM12    | - |
| hsa-miR-1244 | LY75     | LY75     | - |
| hsa-miR-1244 | LYPD5    | LYPD5    | - |
| hsa-miR-1244 | LYPLA1   | LYPLA1   | - |
| hsa-miR-1244 | LYRM2    | LYRM2    | - |
| hsa-miR-1244 | LYSMD3   | LYSMD3   | - |
| hsa-miR-1244 | M6PR     | M6PR     | - |
| hsa-miR-1244 | MAEL     | MAEL     | - |
| hsa-miR-1244 | MAGI1    | MAGI1    | - |
| hsa-miR-1244 | MAGOHB   | MAGOHB   | - |
| hsa-miR-1244 | MAGT1    | MAGT1    | - |
| hsa-miR-1244 | MAML1    | MAML1    | - |
| hsa-miR-1244 | MAN1A2   | MAN1A2   | - |
| hsa-miR-1244 | MAN2A2   | MAN2A2   | - |
| hsa-miR-1244 | MAP2     | MAP2     | - |
| hsa-miR-1244 | MAP3K2   | MAP3K2   | - |
| hsa-miR-1244 | MAP4     | MAP4     | - |
| hsa-miR-1244 | MAP7     | MAP7     | - |
| hsa-miR-1244 | MAP9     | MAP9     | - |
| hsa-miR-1244 | MAPK4    | MAPK4    | - |
| hsa-miR-1244 | MAPK8    | MAPK8    | - |
| hsa-miR-1244 | MAPK9    | MAPK9    | - |
| hsa-miR-1244 | MAPRE1   | MAPRE1   | - |
| hsa-miR-1244 | MARCH1   | MARCH1   | - |
| hsa-miR-1244 | MARCH7   | MARCH7   | - |
| hsa-miR-1244 | MARK1    | MARK1    | - |
| hsa-miR-1244 | MARVELD2 | MARVELD2 | - |
| hsa-miR-1244 | MBD2     | MBD2     | - |
| hsa-miR-1244 | MBNL1    | MBNL1    | - |
| hsa-miR-1244 | MCFD2    | MCFD2    | - |
| hsa-miR-1244 | MCPH1    | MCPH1    | - |
| hsa-miR-1244 | MDFIC    | MDFIC    | - |

|              |          |          |   |
|--------------|----------|----------|---|
| hsa-miR-1244 | MDGA2    | MDGA2    | - |
| hsa-miR-1244 | MDM2     | MDM2     | - |
| hsa-miR-1244 | ME2      | ME2      | - |
| hsa-miR-1244 | MED12L   | MED12L   | - |
| hsa-miR-1244 | MED31    | MED31    | - |
| hsa-miR-1244 | MEF2A    | MEF2A    | - |
| hsa-miR-1244 | MEF2D    | MEF2D    | - |
| hsa-miR-1244 | MEGF11   | MEGF11   | - |
| hsa-miR-1244 | MEIS2    | MEIS2    | - |
| hsa-miR-1244 | MFAP3    | MFAP3    | - |
| hsa-miR-1244 | MFSD6    | MFSD6    | - |
| hsa-miR-1244 | MFSD8    | MFSD8    | - |
| hsa-miR-1244 | MGAM     | MGAM     | - |
| hsa-miR-1244 | MIER3    | MIER3    | - |
| hsa-miR-1244 | MIF4GD   | MIF4GD   | - |
| hsa-miR-1244 | MIPOL1   | MIPOL1   | - |
| hsa-miR-1244 | MKL2     | MKL2     | - |
| hsa-miR-1244 | MLL2     | MLL2     | - |
| hsa-miR-1244 | MLLT10   | MLLT10   | - |
| hsa-miR-1244 | MMAA     | MMAA     | - |
| hsa-miR-1244 | MMD      | MMD      | - |
| hsa-miR-1244 | MME      | MME      | - |
| hsa-miR-1244 | MOBKL1A  | MOBKL1A  | - |
| hsa-miR-1244 | MOBKL3   | MOBKL3   | - |
| hsa-miR-1244 | MOCS1    | MOCS1    | - |
| hsa-miR-1244 | MOG      | MOG      | - |
| hsa-miR-1244 | MPEG1    | MPEG1    | - |
| hsa-miR-1244 | MPHOSPH6 | MPHOSPH6 | - |
| hsa-miR-1244 | MPL      | MPL      | - |
| hsa-miR-1244 | MPZL2    | MPZL2    | - |
| hsa-miR-1244 | MRFAP1   | MRFAP1   | - |
| hsa-miR-1244 | MRPL19   | MRPL19   | - |
| hsa-miR-1244 | MRPS14   | MRPS14   | - |
| hsa-miR-1244 | MS4A1    | MS4A1    | - |
| hsa-miR-1244 | MS4A12   | MS4A12   | - |
| hsa-miR-1244 | MS4A2    | MS4A2    | - |
| hsa-miR-1244 | MS4A3    | MS4A3    | - |
| hsa-miR-1244 | MS4A7    | MS4A7    | - |
| hsa-miR-1244 | MSH4     | MSH4     | - |
| hsa-miR-1244 | MSL3     | MSL3     | - |
| hsa-miR-1244 | MSTN     | MSTN     | - |
| hsa-miR-1244 | MTCH1    | MTCH1    | - |
| hsa-miR-1244 | MTERF    | MTERF    | - |
| hsa-miR-1244 | MTHFD2L  | MTHFD2L  | - |
| hsa-miR-1244 | MTL5     | MTL5     | - |
| hsa-miR-1244 | MTMR7    | MTMR7    | - |
| hsa-miR-1244 | MTOR     | MTOR     | - |
| hsa-miR-1244 | MUC15    | MUC15    | - |
| hsa-miR-1244 | MUC7     | MUC7     | - |
| hsa-miR-1244 | MUCL1    | MUCL1    | - |
| hsa-miR-1244 | MXD1     | MXD1     | - |

|              |           |           |   |
|--------------|-----------|-----------|---|
| hsa-miR-1244 | MYBL1     | MYBL1     | - |
| hsa-miR-1244 | MYCBP     | MYCBP     | - |
| hsa-miR-1244 | MYOZ2     | MYOZ2     | - |
| hsa-miR-1244 | MYPN      | MYPN      | - |
| hsa-miR-1244 | NAA30     | NAA30     | - |
| hsa-miR-1244 | NAALADL2  | NAALADL2  | - |
| hsa-miR-1244 | NACC1     | NACC1     | - |
| hsa-miR-1244 | NAIP      | NAIP      | - |
| hsa-miR-1244 | NANP      | NANP      | - |
| hsa-miR-1244 | NCEH1     | NCEH1     | - |
| hsa-miR-1244 | NCOA4     | NCOA4     | - |
| hsa-miR-1244 | NCOR1     | NCOR1     | - |
| hsa-miR-1244 | NDFIP2    | NDFIP2    | - |
| hsa-miR-1244 | NEBL      | NEBL      | - |
| hsa-miR-1244 | NEDD4     | NEDD4     | - |
| hsa-miR-1244 | NEUROD2   | NEUROD2   | - |
| hsa-miR-1244 | NEUROD4   | NEUROD4   | - |
| hsa-miR-1244 | NFIB      | NFIB      | - |
| hsa-miR-1244 | NHLH2     | NHLH2     | - |
| hsa-miR-1244 | NHLRC2    | NHLRC2    | - |
| hsa-miR-1244 | NIN       | NIN       | - |
| hsa-miR-1244 | NIPSNAP3A | NIPSNAP3A | - |
| hsa-miR-1244 | NKAIN2    | NKAIN2    | - |
| hsa-miR-1244 | NKTR      | NKTR      | - |
| hsa-miR-1244 | NLE1      | NLE1      | - |
| hsa-miR-1244 | NLK       | NLK       | - |
| hsa-miR-1244 | NLRC3     | NLRC3     | - |
| hsa-miR-1244 | NNT       | NNT       | - |
| hsa-miR-1244 | NOL4      | NOL4      | - |
| hsa-miR-1244 | NOS3      | NOS3      | - |
| hsa-miR-1244 | NOVA1     | NOVA1     | - |
| hsa-miR-1244 | NPY1R     | NPY1R     | - |
| hsa-miR-1244 | NR3C2     | NR3C2     | - |
| hsa-miR-1244 | NRG3      | NRG3      | - |
| hsa-miR-1244 | NRIP1     | NRIP1     | - |
| hsa-miR-1244 | NRP1      | NRP1      | - |
| hsa-miR-1244 | NRP2      | NRP2      | - |
| hsa-miR-1244 | NRXN1     | NRXN1     | - |
| hsa-miR-1244 | NSUN4     | NSUN4     | - |
| hsa-miR-1244 | NT5C1B    | NT5C1B    | - |
| hsa-miR-1244 | NTNG1     | NTNG1     | - |
| hsa-miR-1244 | NUDCD3    | NUDCD3    | - |
| hsa-miR-1244 | NUDT21    | NUDT21    | - |
| hsa-miR-1244 | NUMBL     | NUMBL     | - |
| hsa-miR-1244 | NUP54     | NUP54     | - |
| hsa-miR-1244 | NUS1      | NUS1      | - |
| hsa-miR-1244 | NXT2      | NXT2      | - |
| hsa-miR-1244 | OBFC2A    | OBFC2A    | - |
| hsa-miR-1244 | ODF2      | ODF2      | - |
| hsa-miR-1244 | ODF2L     | ODF2L     | - |
| hsa-miR-1244 | ODZ1      | ODZ1      | - |

|              |             |             |   |
|--------------|-------------|-------------|---|
| hsa-miR-1244 | OGFRL1      | OGFRL1      | - |
| hsa-miR-1244 | OLA1        | OLA1        | - |
| hsa-miR-1244 | OPN5        | OPN5        | - |
| hsa-miR-1244 | OSBP        | OSBP        | - |
| hsa-miR-1244 | OSBPL2      | OSBPL2      | - |
| hsa-miR-1244 | OSBPL3      | OSBPL3      | - |
| hsa-miR-1244 | OSGIN2      | OSGIN2      | - |
| hsa-miR-1244 | OTUD1       | OTUD1       | - |
| hsa-miR-1244 | P2RX7       | P2RX7       | - |
| hsa-miR-1244 | PACRGL      | PACRGL      | - |
| hsa-miR-1244 | PAFAH1B2    | PAFAH1B2    | - |
| hsa-miR-1244 | PAIP2B      | PAIP2B      | - |
| hsa-miR-1244 | PAK7        | PAK7        | - |
| hsa-miR-1244 | PALLD       | PALLD       | - |
| hsa-miR-1244 | PALM2-AKAP2 | PALM2-AKAP2 | - |
| hsa-miR-1244 | PAN3        | PAN3        | - |
| hsa-miR-1244 | PAPPA2      | PAPPA2      | - |
| hsa-miR-1244 | PAQR3       | PAQR3       | - |
| hsa-miR-1244 | PAQR8       | PAQR8       | - |
| hsa-miR-1244 | PARD6B      | PARD6B      | - |
| hsa-miR-1244 | PARP6       | PARP6       | - |
| hsa-miR-1244 | PAWR        | PAWR        | - |
| hsa-miR-1244 | PBX2        | PBX2        | - |
| hsa-miR-1244 | PCDH11X     | PCDH11X     | - |
| hsa-miR-1244 | PCDH11Y     | PCDH11Y     | - |
| hsa-miR-1244 | PCDH15      | PCDH15      | - |
| hsa-miR-1244 | PCDH7       | PCDH7       | - |
| hsa-miR-1244 | PCGF6       | PCGF6       | - |
| hsa-miR-1244 | PCNX        | PCNX        | - |
| hsa-miR-1244 | PDE4B       | PDE4B       | - |
| hsa-miR-1244 | PDE6B       | PDE6B       | - |
| hsa-miR-1244 | PDE6H       | PDE6H       | - |
| hsa-miR-1244 | PDIK1L      | PDIK1L      | - |
| hsa-miR-1244 | PDLIM5      | PDLIM5      | - |
| hsa-miR-1244 | PDP1        | PDP1        | - |
| hsa-miR-1244 | PDZD7       | PDZD7       | - |
| hsa-miR-1244 | PEG3        | PEG3        | - |
| hsa-miR-1244 | PHF16       | PHF16       | - |
| hsa-miR-1244 | PHF6        | PHF6        | - |
| hsa-miR-1244 | PHKA1       | PHKA1       | - |
| hsa-miR-1244 | PHKB        | PHKB        | - |
| hsa-miR-1244 | PHYHIPL     | PHYHIPL     | - |
| hsa-miR-1244 | PI15        | PI15        | - |
| hsa-miR-1244 | PI4K2B      | PI4K2B      | - |
| hsa-miR-1244 | PICALM      | PICALM      | - |
| hsa-miR-1244 | PIK3C2A     | PIK3C2A     | - |
| hsa-miR-1244 | PIK3C2G     | PIK3C2G     | - |
| hsa-miR-1244 | PIK3R1      | PIK3R1      | - |
| hsa-miR-1244 | PIKFYVE     | PIKFYVE     | - |
| hsa-miR-1244 | PIP4K2C     | PIP4K2C     | - |
| hsa-miR-1244 | PIPOX       | PIPOX       | - |

|              |         |         |   |
|--------------|---------|---------|---|
| hsa-miR-1244 | PIWIL4  | PIWIL4  | - |
| hsa-miR-1244 | PKP2    | PKP2    | - |
| hsa-miR-1244 | PLAA    | PLAA    | - |
| hsa-miR-1244 | PLAG1   | PLAG1   | - |
| hsa-miR-1244 | PLAGL1  | PLAGL1  | - |
| hsa-miR-1244 | PLB1    | PLB1    | - |
| hsa-miR-1244 | PLCB1   | PLCB1   | - |
| hsa-miR-1244 | PLEKHA5 | PLEKHA5 | - |
| hsa-miR-1244 | PLIN1   | PLIN1   | - |
| hsa-miR-1244 | PLXDC1  | PLXDC1  | - |
| hsa-miR-1244 | PM20D2  | PM20D2  | - |
| hsa-miR-1244 | PMAIP1  | PMAIP1  | - |
| hsa-miR-1244 | PMPCB   | PMPCB   | - |
| hsa-miR-1244 | POLE3   | POLE3   | - |
| hsa-miR-1244 | POLK    | POLK    | - |
| hsa-miR-1244 | POLR2G  | POLR2G  | - |
| hsa-miR-1244 | POLR3E  | POLR3E  | - |
| hsa-miR-1244 | PON2    | PON2    | - |
| hsa-miR-1244 | POTEA   | POTEA   | - |
| hsa-miR-1244 | POU4F1  | POU4F1  | - |
| hsa-miR-1244 | PPEF1   | PPEF1   | - |
| hsa-miR-1244 | PPIP5K1 | PPIP5K1 | - |
| hsa-miR-1244 | PPM1A   | PPM1A   | - |
| hsa-miR-1244 | PPM1L   | PPM1L   | - |
| hsa-miR-1244 | PPP1CC  | PPP1CC  | - |
| hsa-miR-1244 | PPP1R3A | PPP1R3A | - |
| hsa-miR-1244 | PPP1R9A | PPP1R9A | - |
| hsa-miR-1244 | PPP2R1B | PPP2R1B | - |
| hsa-miR-1244 | PPP2R3A | PPP2R3A | - |
| hsa-miR-1244 | PPP2R5E | PPP2R5E | - |
| hsa-miR-1244 | PPP3R1  | PPP3R1  | - |
| hsa-miR-1244 | PRDM1   | PRDM1   | - |
| hsa-miR-1244 | PRIMA1  | PRIMA1  | - |
| hsa-miR-1244 | PRKCB   | PRKCB   | - |
| hsa-miR-1244 | PRKCE   | PRKCE   | - |
| hsa-miR-1244 | PRLHR   | PRLHR   | - |
| hsa-miR-1244 | PRLR    | PRLR    | - |
| hsa-miR-1244 | PRUNE2  | PRUNE2  | - |
| hsa-miR-1244 | PSG5    | PSG5    | - |
| hsa-miR-1244 | PTEN    | PTEN    | - |
| hsa-miR-1244 | PTGR2   | PTGR2   | - |
| hsa-miR-1244 | PTN     | PTN     | - |
| hsa-miR-1244 | PTPN22  | PTPN22  | - |
| hsa-miR-1244 | PTPN3   | PTPN3   | - |
| hsa-miR-1244 | PTPRD   | PTPRD   | - |
| hsa-miR-1244 | PTPRJ   | PTPRJ   | - |
| hsa-miR-1244 | PTPRN   | PTPRN   | - |
| hsa-miR-1244 | PTPRR   | PTPRR   | - |
| hsa-miR-1244 | PVR     | PVR     | - |
| hsa-miR-1244 | QDPR    | QDPR    | - |
| hsa-miR-1244 | QKI     | QKI     | - |

|              |           |           |   |
|--------------|-----------|-----------|---|
| hsa-miR-1244 | RAB11FIP1 | RAB11FIP1 | - |
| hsa-miR-1244 | RAB18     | RAB18     | - |
| hsa-miR-1244 | RAB2A     | RAB2A     | - |
| hsa-miR-1244 | RAB31     | RAB31     | - |
| hsa-miR-1244 | RAB39     | RAB39     | - |
| hsa-miR-1244 | RAB6A     | RAB6A     | - |
| hsa-miR-1244 | RAB6C     | RAB6C     | - |
| hsa-miR-1244 | RAB7L1    | RAB7L1    | - |
| hsa-miR-1244 | RABEP1    | RABEP1    | - |
| hsa-miR-1244 | RAD52     | RAD52     | - |
| hsa-miR-1244 | RALA      | RALA      | - |
| hsa-miR-1244 | RALGPS1   | RALGPS1   | - |
| hsa-miR-1244 | RANBP3    | RANBP3    | - |
| hsa-miR-1244 | RAP1B     | RAP1B     | - |
| hsa-miR-1244 | RAP1GDS1  | RAP1GDS1  | - |
| hsa-miR-1244 | RAPGEF2   | RAPGEF2   | - |
| hsa-miR-1244 | RASA1     | RASA1     | - |
| hsa-miR-1244 | RASSF2    | RASSF2    | - |
| hsa-miR-1244 | RB1CC1    | RB1CC1    | - |
| hsa-miR-1244 | RBAK      | RBAK      | - |
| hsa-miR-1244 | RBBP9     | RBBP9     | - |
| hsa-miR-1244 | RBL1      | RBL1      | - |
| hsa-miR-1244 | RBM12     | RBM12     | - |
| hsa-miR-1244 | RBM14     | RBM14     | - |
| hsa-miR-1244 | RBM43     | RBM43     | - |
| hsa-miR-1244 | RBM46     | RBM46     | - |
| hsa-miR-1244 | RBM8A     | RBM8A     | - |
| hsa-miR-1244 | RBMX      | RBMX      | - |
| hsa-miR-1244 | RCBTB1    | RCBTB1    | - |
| hsa-miR-1244 | RDH11     | RDH11     | - |
| hsa-miR-1244 | RECK      | RECK      | - |
| hsa-miR-1244 | REEP3     | REEP3     | - |
| hsa-miR-1244 | RERE      | RERE      | - |
| hsa-miR-1244 | REV1      | REV1      | - |
| hsa-miR-1244 | RGS21     | RGS21     | - |
| hsa-miR-1244 | RGS4      | RGS4      | - |
| hsa-miR-1244 | RGS7BP    | RGS7BP    | - |
| hsa-miR-1244 | RHEB      | RHEB      | - |
| hsa-miR-1244 | RHOA      | RHOA      | - |
| hsa-miR-1244 | RHOBTB1   | RHOBTB1   | - |
| hsa-miR-1244 | RIC8B     | RIC8B     | - |
| hsa-miR-1244 | RICTOR    | RICTOR    | - |
| hsa-miR-1244 | RNASEL    | RNASEL    | - |
| hsa-miR-1244 | RNF114    | RNF114    | - |
| hsa-miR-1244 | RNF115    | RNF115    | - |
| hsa-miR-1244 | RNF14     | RNF14     | - |
| hsa-miR-1244 | RNF141    | RNF141    | - |
| hsa-miR-1244 | RNF169    | RNF169    | - |
| hsa-miR-1244 | RNF170    | RNF170    | - |
| hsa-miR-1244 | RNF186    | RNF186    | - |
| hsa-miR-1244 | RNF19A    | RNF19A    | - |

|              |           |           |   |
|--------------|-----------|-----------|---|
| hsa-miR-1244 | RNF216    | RNF216    | - |
| hsa-miR-1244 | RNF34     | RNF34     | - |
| hsa-miR-1244 | RNF38     | RNF38     | - |
| hsa-miR-1244 | RNGTT     | RNGTT     | - |
| hsa-miR-1244 | ROCK1     | ROCK1     | - |
| hsa-miR-1244 | ROD1      | ROD1      | - |
| hsa-miR-1244 | RP1       | RP1       | - |
| hsa-miR-1244 | RP2       | RP2       | - |
| hsa-miR-1244 | RPAIN     | RPAIN     | - |
| hsa-miR-1244 | RPL13     | RPL13     | - |
| hsa-miR-1244 | RPL27A    | RPL27A    | - |
| hsa-miR-1244 | RRAS2     | RRAS2     | - |
| hsa-miR-1244 | RREB1     | RREB1     | - |
| hsa-miR-1244 | RRM1      | RRM1      | - |
| hsa-miR-1244 | RRM2B     | RRM2B     | - |
| hsa-miR-1244 | RTKN2     | RTKN2     | - |
| hsa-miR-1244 | RTN4IP1   | RTN4IP1   | - |
| hsa-miR-1244 | RTP1      | RTP1      | - |
| hsa-miR-1244 | RUNX1     | RUNX1     | - |
| hsa-miR-1244 | S100A7A   | S100A7A   | - |
| hsa-miR-1244 | SAA2      | SAA2      | - |
| hsa-miR-1244 | SASS6     | SASS6     | - |
| hsa-miR-1244 | SAT1      | SAT1      | - |
| hsa-miR-1244 | SATB2     | SATB2     | - |
| hsa-miR-1244 | SATL1     | SATL1     | - |
| hsa-miR-1244 | SAV1      | SAV1      | - |
| hsa-miR-1244 | SBDS      | SBDS      | - |
| hsa-miR-1244 | SCD       | SCD       | - |
| hsa-miR-1244 | SCLY      | SCLY      | - |
| hsa-miR-1244 | SCN1A     | SCN1A     | - |
| hsa-miR-1244 | SCN2A     | SCN2A     | - |
| hsa-miR-1244 | SCN8A     | SCN8A     | - |
| hsa-miR-1244 | SCUBE3    | SCUBE3    | - |
| hsa-miR-1244 | SDC2      | SDC2      | - |
| hsa-miR-1244 | SDHAF2    | SDHAF2    | - |
| hsa-miR-1244 | SDK1      | SDK1      | - |
| hsa-miR-1244 | SEC16B    | SEC16B    | - |
| hsa-miR-1244 | SEC23A    | SEC23A    | - |
| hsa-miR-1244 | SEC23IP   | SEC23IP   | - |
| hsa-miR-1244 | SEC24A    | SEC24A    | - |
| hsa-miR-1244 | SECISBP2L | SECISBP2L | - |
| hsa-miR-1244 | SEL1L     | SEL1L     | - |
| hsa-miR-1244 | SEL1L3    | SEL1L3    | - |
| hsa-miR-1244 | SELE      | SELE      | - |
| hsa-miR-1244 | SELT      | SELT      | - |
| hsa-miR-1244 | SEMA3C    | SEMA3C    | - |
| hsa-miR-1244 | SEMA3E    | SEMA3E    | - |
| hsa-miR-1244 | SEMA4F    | SEMA4F    | - |
| hsa-miR-1244 | SENP6     | SENP6     | - |
| hsa-miR-1244 | SEPT2     | SEPT2     | - |
| hsa-miR-1244 | SERBP1    | SERBP1    | - |



|              |          |          |   |
|--------------|----------|----------|---|
| hsa-miR-1244 | SERPINB5 | SERPINB5 | - |
| hsa-miR-1244 | SERPINC1 | SERPINC1 | - |
| hsa-miR-1244 | SERPINE1 | SERPINE1 | - |
| hsa-miR-1244 | SERPINE2 | SERPINE2 | - |
| hsa-miR-1244 | SERTAD2  | SERTAD2  | - |
| hsa-miR-1244 | SETD4    | SETD4    | - |
| hsa-miR-1244 | SFTPB    | SFTPB    | - |
| hsa-miR-1244 | SGIP1    | SGIP1    | - |
| hsa-miR-1244 | SGK2     | SGK2     | - |
| hsa-miR-1244 | SGMS1    | SGMS1    | - |
| hsa-miR-1244 | SH3GLB1  | SH3GLB1  | - |
| hsa-miR-1244 | SH3KBP1  | SH3KBP1  | - |
| hsa-miR-1244 | SH3RF1   | SH3RF1   | - |
| hsa-miR-1244 | SHC4     | SHC4     | - |
| hsa-miR-1244 | SIAH3    | SIAH3    | - |
| hsa-miR-1244 | SIK2     | SIK2     | - |
| hsa-miR-1244 | SIK3     | SIK3     | - |
| hsa-miR-1244 | SLA      | SLA      | - |
| hsa-miR-1244 | SLAMF7   | SLAMF7   | - |
| hsa-miR-1244 | SLC16A6  | SLC16A6  | - |
| hsa-miR-1244 | SLC16A7  | SLC16A7  | - |
| hsa-miR-1244 | SLC16A9  | SLC16A9  | - |
| hsa-miR-1244 | SLC17A2  | SLC17A2  | - |
| hsa-miR-1244 | SLC17A8  | SLC17A8  | - |
| hsa-miR-1244 | SLC1A2   | SLC1A2   | - |
| hsa-miR-1244 | SLC20A2  | SLC20A2  | - |
| hsa-miR-1244 | SLC24A1  | SLC24A1  | - |
| hsa-miR-1244 | SLC25A43 | SLC25A43 | - |
| hsa-miR-1244 | SLC26A4  | SLC26A4  | - |
| hsa-miR-1244 | SLC26A7  | SLC26A7  | - |
| hsa-miR-1244 | SLC30A5  | SLC30A5  | - |
| hsa-miR-1244 | SLC30A8  | SLC30A8  | - |
| hsa-miR-1244 | SLC30A9  | SLC30A9  | - |
| hsa-miR-1244 | SLC35B4  | SLC35B4  | - |
| hsa-miR-1244 | SLC35D1  | SLC35D1  | - |
| hsa-miR-1244 | SLC38A2  | SLC38A2  | - |
| hsa-miR-1244 | SLC39A10 | SLC39A10 | - |
| hsa-miR-1244 | SLC39A8  | SLC39A8  | - |
| hsa-miR-1244 | SLC41A2  | SLC41A2  | - |
| hsa-miR-1244 | SLC44A5  | SLC44A5  | - |
| hsa-miR-1244 | SLC4A5   | SLC4A5   | - |
| hsa-miR-1244 | SLC5A12  | SLC5A12  | - |
| hsa-miR-1244 | SLC5A7   | SLC5A7   | - |
| hsa-miR-1244 | SLC6A15  | SLC6A15  | - |
| hsa-miR-1244 | SLC9A11  | SLC9A11  | - |
| hsa-miR-1244 | SLC9A2   | SLC9A2   | - |
| hsa-miR-1244 | SLCO3A1  | SLCO3A1  | - |
| hsa-miR-1244 | SLFN13   | SLFN13   | - |
| hsa-miR-1244 | SLITRK4  | SLITRK4  | - |
| hsa-miR-1244 | SLITRK5  | SLITRK5  | - |
| hsa-miR-1244 | SLMO2    | SLMO2    | - |

|              |          |          |   |
|--------------|----------|----------|---|
| hsa-miR-1244 | SMAD7    | SMAD7    | - |
| hsa-miR-1244 | SMARCC2  | SMARCC2  | - |
| hsa-miR-1244 | SMR3A    | SMR3A    | - |
| hsa-miR-1244 | SMR3B    | SMR3B    | - |
| hsa-miR-1244 | SMURF2   | SMURF2   | - |
| hsa-miR-1244 | SNAP29   | SNAP29   | - |
| hsa-miR-1244 | SNCA     | SNCA     | - |
| hsa-miR-1244 | SNRK     | SNRK     | - |
| hsa-miR-1244 | SNRNP27  | SNRNP27  | - |
| hsa-miR-1244 | SNRNP48  | SNRNP48  | - |
| hsa-miR-1244 | SNX16    | SNX16    | - |
| hsa-miR-1244 | SNX18    | SNX18    | - |
| hsa-miR-1244 | SNX2     | SNX2     | - |
| hsa-miR-1244 | SOCS4    | SOCS4    | - |
| hsa-miR-1244 | SORCS1   | SORCS1   | - |
| hsa-miR-1244 | SOX21    | SOX21    | - |
| hsa-miR-1244 | SOX9     | SOX9     | - |
| hsa-miR-1244 | SPATA18  | SPATA18  | - |
| hsa-miR-1244 | SPEF2    | SPEF2    | - |
| hsa-miR-1244 | SPG7     | SPG7     | - |
| hsa-miR-1244 | SPOCK1   | SPOCK1   | - |
| hsa-miR-1244 | SPRED1   | SPRED1   | - |
| hsa-miR-1244 | SPRY3    | SPRY3    | - |
| hsa-miR-1244 | SPRYD4   | SPRYD4   | - |
| hsa-miR-1244 | SPTY2D1  | SPTY2D1  | - |
| hsa-miR-1244 | SRP14    | SRP14    | - |
| hsa-miR-1244 | SRP72    | SRP72    | - |
| hsa-miR-1244 | SSBP2    | SSBP2    | - |
| hsa-miR-1244 | SSFA2    | SSFA2    | - |
| hsa-miR-1244 | SSX2IP   | SSX2IP   | - |
| hsa-miR-1244 | ST8SIA4  | ST8SIA4  | - |
| hsa-miR-1244 | STAM     | STAM     | - |
| hsa-miR-1244 | STAR     | STAR     | - |
| hsa-miR-1244 | STAT3    | STAT3    | - |
| hsa-miR-1244 | STATH    | STATH    | - |
| hsa-miR-1244 | STK38    | STK38    | - |
| hsa-miR-1244 | STK4     | STK4     | - |
| hsa-miR-1244 | STX11    | STX11    | - |
| hsa-miR-1244 | STX12    | STX12    | - |
| hsa-miR-1244 | STYK1    | STYK1    | - |
| hsa-miR-1244 | SUMO2    | SUMO2    | - |
| hsa-miR-1244 | SURF4    | SURF4    | - |
| hsa-miR-1244 | SUV420H1 | SUV420H1 | - |
| hsa-miR-1244 | SVIP     | SVIP     | - |
| hsa-miR-1244 | SYNJ1    | SYNJ1    | - |
| hsa-miR-1244 | SYNPO2   | SYNPO2   | - |
| hsa-miR-1244 | SYT15    | SYT15    | - |
| hsa-miR-1244 | SYT16    | SYT16    | - |
| hsa-miR-1244 | SYTL2    | SYTL2    | - |
| hsa-miR-1244 | TAF2     | TAF2     | - |
| hsa-miR-1244 | TAF9B    | TAF9B    | - |

|              |          |          |   |
|--------------|----------|----------|---|
| hsa-miR-1244 | TANC1    | TANC1    | - |
| hsa-miR-1244 | TAX1BP1  | TAX1BP1  | - |
| hsa-miR-1244 | TBC1D12  | TBC1D12  | - |
| hsa-miR-1244 | TBC1D14  | TBC1D14  | - |
| hsa-miR-1244 | TBC1D2B  | TBC1D2B  | - |
| hsa-miR-1244 | TBL2     | TBL2     | - |
| hsa-miR-1244 | TBX19    | TBX19    | - |
| hsa-miR-1244 | TBX22    | TBX22    | - |
| hsa-miR-1244 | TCEANC   | TCEANC   | - |
| hsa-miR-1244 | TDG      | TDG      | - |
| hsa-miR-1244 | TDGF1    | TDGF1    | - |
| hsa-miR-1244 | TFAM     | TFAM     | - |
| hsa-miR-1244 | TFEC     | TFEC     | - |
| hsa-miR-1244 | TGFB2    | TGFB2    | - |
| hsa-miR-1244 | TGFBR1   | TGFBR1   | - |
| hsa-miR-1244 | TGFBR2   | TGFBR2   | - |
| hsa-miR-1244 | TGIF2    | TGIF2    | - |
| hsa-miR-1244 | THAP2    | THAP2    | - |
| hsa-miR-1244 | THAP6    | THAP6    | - |
| hsa-miR-1244 | THBS2    | THBS2    | - |
| hsa-miR-1244 | THNSL1   | THNSL1   | - |
| hsa-miR-1244 | TIMP3    | TIMP3    | - |
| hsa-miR-1244 | TKTL1    | TKTL1    | - |
| hsa-miR-1244 | TLE1     | TLE1     | - |
| hsa-miR-1244 | TLK2     | TLK2     | - |
| hsa-miR-1244 | TLL1     | TLL1     | - |
| hsa-miR-1244 | TM2D2    | TM2D2    | - |
| hsa-miR-1244 | TMCC1    | TMCC1    | - |
| hsa-miR-1244 | TMED5    | TMED5    | - |
| hsa-miR-1244 | TMEFF1   | TMEFF1   | - |
| hsa-miR-1244 | TMEM107  | TMEM107  | - |
| hsa-miR-1244 | TMEM119  | TMEM119  | - |
| hsa-miR-1244 | TMEM154  | TMEM154  | - |
| hsa-miR-1244 | TMEM161B | TMEM161B | - |
| hsa-miR-1244 | TMEM181  | TMEM181  | - |
| hsa-miR-1244 | TMEM183A | TMEM183A | - |
| hsa-miR-1244 | TMEM183B | TMEM183B | - |
| hsa-miR-1244 | TMEM184C | TMEM184C | - |
| hsa-miR-1244 | TMEM188  | TMEM188  | - |
| hsa-miR-1244 | TMEM19   | TMEM19   | - |
| hsa-miR-1244 | TMEM200B | TMEM200B | - |
| hsa-miR-1244 | TMEM215  | TMEM215  | - |
| hsa-miR-1244 | TMEM220  | TMEM220  | - |
| hsa-miR-1244 | TMEM30A  | TMEM30A  | - |
| hsa-miR-1244 | TMEM33   | TMEM33   | - |
| hsa-miR-1244 | TMEM35   | TMEM35   | - |
| hsa-miR-1244 | TMEM38B  | TMEM38B  | - |
| hsa-miR-1244 | TMEM41B  | TMEM41B  | - |
| hsa-miR-1244 | TMEM43   | TMEM43   | - |
| hsa-miR-1244 | TMEM87A  | TMEM87A  | - |
| hsa-miR-1244 | TMPO     | TMPO     | - |

|              |           |           |   |
|--------------|-----------|-----------|---|
| hsa-miR-1244 | TMPRSS11E | TMPRSS11E | - |
| hsa-miR-1244 | TMSB4X    | TMSB4X    | - |
| hsa-miR-1244 | TMSL3     | TMSL3     | - |
| hsa-miR-1244 | TMTC2     | TMTC2     | - |
| hsa-miR-1244 | TMX3      | TMX3      | - |
| hsa-miR-1244 | TMX4      | TMX4      | - |
| hsa-miR-1244 | TNFAIP8L2 | TNFAIP8L2 | - |
| hsa-miR-1244 | TNIK      | TNIK      | - |
| hsa-miR-1244 | TNKS      | TNKS      | - |
| hsa-miR-1244 | TNPO1     | TNPO1     | - |
| hsa-miR-1244 | TNS3      | TNS3      | - |
| hsa-miR-1244 | TOX       | TOX       | - |
| hsa-miR-1244 | TP53INP1  | TP53INP1  | - |
| hsa-miR-1244 | TPD52     | TPD52     | - |
| hsa-miR-1244 | TPD52L1   | TPD52L1   | - |
| hsa-miR-1244 | TPPP      | TPPP      | - |
| hsa-miR-1244 | TRAT1     | TRAT1     | - |
| hsa-miR-1244 | TREML4    | TREML4    | - |
| hsa-miR-1244 | TRHDE     | TRHDE     | - |
| hsa-miR-1244 | TRIB1     | TRIB1     | - |
| hsa-miR-1244 | TRIM2     | TRIM2     | - |
| hsa-miR-1244 | TRIM36    | TRIM36    | - |
| hsa-miR-1244 | TRIM4     | TRIM4     | - |
| hsa-miR-1244 | TRIM50    | TRIM50    | - |
| hsa-miR-1244 | TRIM59    | TRIM59    | - |
| hsa-miR-1244 | TRIM71    | TRIM71    | - |
| hsa-miR-1244 | TRIM9     | TRIM9     | - |
| hsa-miR-1244 | TRMT5     | TRMT5     | - |
| hsa-miR-1244 | TRPM8     | TRPM8     | - |
| hsa-miR-1244 | TSC22D1   | TSC22D1   | - |
| hsa-miR-1244 | TSGA10    | TSGA10    | - |
| hsa-miR-1244 | TSPAN12   | TSPAN12   | - |
| hsa-miR-1244 | TSPAN14   | TSPAN14   | - |
| hsa-miR-1244 | TSPAN2    | TSPAN2    | - |
| hsa-miR-1244 | TSSK2     | TSSK2     | - |
| hsa-miR-1244 | TTC14     | TTC14     | - |
| hsa-miR-1244 | TTC19     | TTC19     | - |
| hsa-miR-1244 | TTC22     | TTC22     | - |
| hsa-miR-1244 | TTC30A    | TTC30A    | - |
| hsa-miR-1244 | TTC33     | TTC33     | - |
| hsa-miR-1244 | TTF1      | TTF1      | - |
| hsa-miR-1244 | TLL1      | TLL1      | - |
| hsa-miR-1244 | TXLNA     | TXLNA     | - |
| hsa-miR-1244 | TXLNG     | TXLNG     | - |
| hsa-miR-1244 | TYW1      | TYW1      | - |
| hsa-miR-1244 | TYW1B     | TYW1B     | - |
| hsa-miR-1244 | UBAP1     | UBAP1     | - |
| hsa-miR-1244 | UBE2R2    | UBE2R2    | - |
| hsa-miR-1244 | UBE3A     | UBE3A     | - |
| hsa-miR-1244 | UBE4A     | UBE4A     | - |
| hsa-miR-1244 | UBL3      | UBL3      | - |

|              |          |          |   |
|--------------|----------|----------|---|
| hsa-miR-1244 | UBP1     | UBP1     | - |
| hsa-miR-1244 | UBR2     | UBR2     | - |
| hsa-miR-1244 | UBR5     | UBR5     | - |
| hsa-miR-1244 | UBTD2    | UBTD2    | - |
| hsa-miR-1244 | UBXN7    | UBXN7    | - |
| hsa-miR-1244 | UCK2     | UCK2     | - |
| hsa-miR-1244 | UFSP2    | UFSP2    | - |
| hsa-miR-1244 | UHRF1BP1 | UHRF1BP1 | - |
| hsa-miR-1244 | UHRF2    | UHRF2    | - |
| hsa-miR-1244 | UPK1B    | UPK1B    | - |
| hsa-miR-1244 | UQCRB    | UQCRB    | - |
| hsa-miR-1244 | USH2A    | USH2A    | - |
| hsa-miR-1244 | USP12    | USP12    | - |
| hsa-miR-1244 | USP15    | USP15    | - |
| hsa-miR-1244 | USP25    | USP25    | - |
| hsa-miR-1244 | USP44    | USP44    | - |
| hsa-miR-1244 | USP53    | USP53    | - |
| hsa-miR-1244 | USP54    | USP54    | - |
| hsa-miR-1244 | USP6NL   | USP6NL   | - |
| hsa-miR-1244 | USP8     | USP8     | - |
| hsa-miR-1244 | USP9X    | USP9X    | - |
| hsa-miR-1244 | VAPB     | VAPB     | - |
| hsa-miR-1244 | VBP1     | VBP1     | - |
| hsa-miR-1244 | VCPIP1   | VCPIP1   | - |
| hsa-miR-1244 | VLDLR    | VLDLR    | - |
| hsa-miR-1244 | VN1R1    | VN1R1    | - |
| hsa-miR-1244 | VPS13C   | VPS13C   | - |
| hsa-miR-1244 | VPS26A   | VPS26A   | - |
| hsa-miR-1244 | VPS36    | VPS36    | - |
| hsa-miR-1244 | VSIG1    | VSIG1    | - |
| hsa-miR-1244 | WAPAL    | WAPAL    | - |
| hsa-miR-1244 | WASL     | WASL     | - |
| hsa-miR-1244 | WDFY2    | WDFY2    | - |
| hsa-miR-1244 | WDFY3    | WDFY3    | - |
| hsa-miR-1244 | WDR20    | WDR20    | - |
| hsa-miR-1244 | WDR33    | WDR33    | - |
| hsa-miR-1244 | WDR36    | WDR36    | - |
| hsa-miR-1244 | WDR7     | WDR7     | - |
| hsa-miR-1244 | WHSC1    | WHSC1    | - |
| hsa-miR-1244 | WNK1     | WNK1     | - |
| hsa-miR-1244 | WNT8A    | WNT8A    | - |
| hsa-miR-1244 | WRB      | WRB      | - |
| hsa-miR-1244 | WWC2     | WWC2     | - |
| hsa-miR-1244 | XPO5     | XPO5     | - |
| hsa-miR-1244 | XYLT2    | XYLT2    | - |
| hsa-miR-1244 | YAP1     | YAP1     | - |
| hsa-miR-1244 | YES1     | YES1     | - |
| hsa-miR-1244 | YIPF4    | YIPF4    | - |
| hsa-miR-1244 | YIPF5    | YIPF5    | - |
| hsa-miR-1244 | YPEL5    | YPEL5    | - |
| hsa-miR-1244 | YTHDF1   | YTHDF1   | - |

|              |          |          |   |
|--------------|----------|----------|---|
| hsa-miR-1244 | YWHAZ    | YWHAZ    | - |
| hsa-miR-1244 | ZBTB1    | ZBTB1    | - |
| hsa-miR-1244 | ZBTB33   | ZBTB33   | - |
| hsa-miR-1244 | ZBTB38   | ZBTB38   | - |
| hsa-miR-1244 | ZBTB49   | ZBTB49   | - |
| hsa-miR-1244 | ZC3H12C  | ZC3H12C  | - |
| hsa-miR-1244 | ZC3HAV1L | ZC3HAV1L | - |
| hsa-miR-1244 | ZCCHC6   | ZCCHC6   | - |
| hsa-miR-1244 | ZCRB1    | ZCRB1    | - |
| hsa-miR-1244 | ZDHHC17  | ZDHHC17  | - |
| hsa-miR-1244 | ZEB2     | ZEB2     | - |
| hsa-miR-1244 | ZFAND1   | ZFAND1   | - |
| hsa-miR-1244 | ZFP37    | ZFP37    | - |
| hsa-miR-1244 | ZFP90    | ZFP90    | - |
| hsa-miR-1244 | ZFR      | ZFR      | - |
| hsa-miR-1244 | ZFYVE16  | ZFYVE16  | - |
| hsa-miR-1244 | ZFYVE26  | ZFYVE26  | - |
| hsa-miR-1244 | ZHX1     | ZHX1     | - |
| hsa-miR-1244 | ZHX2     | ZHX2     | - |
| hsa-miR-1244 | ZMYM2    | ZMYM2    | - |
| hsa-miR-1244 | ZMYM5    | ZMYM5    | - |
| hsa-miR-1244 | ZMYM6    | ZMYM6    | - |
| hsa-miR-1244 | ZMYND11  | ZMYND11  | - |
| hsa-miR-1244 | ZNF100   | ZNF100   | - |
| hsa-miR-1244 | ZNF117   | ZNF117   | - |
| hsa-miR-1244 | ZNF174   | ZNF174   | - |
| hsa-miR-1244 | ZNF180   | ZNF180   | - |
| hsa-miR-1244 | ZNF208   | ZNF208   | - |
| hsa-miR-1244 | ZNF212   | ZNF212   | - |
| hsa-miR-1244 | ZNF22    | ZNF22    | - |
| hsa-miR-1244 | ZNF225   | ZNF225   | - |
| hsa-miR-1244 | ZNF227   | ZNF227   | - |
| hsa-miR-1244 | ZNF229   | ZNF229   | - |
| hsa-miR-1244 | ZNF238   | ZNF238   | - |
| hsa-miR-1244 | ZNF24    | ZNF24    | - |
| hsa-miR-1244 | ZNF248   | ZNF248   | - |
| hsa-miR-1244 | ZNF251   | ZNF251   | - |
| hsa-miR-1244 | ZNF260   | ZNF260   | - |
| hsa-miR-1244 | ZNF322A  | ZNF322A  | - |
| hsa-miR-1244 | ZNF322B  | ZNF322B  | - |
| hsa-miR-1244 | ZNF33B   | ZNF33B   | - |
| hsa-miR-1244 | ZNF423   | ZNF423   | - |
| hsa-miR-1244 | ZNF434   | ZNF434   | - |
| hsa-miR-1244 | ZNF441   | ZNF441   | - |
| hsa-miR-1244 | ZNF445   | ZNF445   | - |
| hsa-miR-1244 | ZNF510   | ZNF510   | - |
| hsa-miR-1244 | ZNF518A  | ZNF518A  | - |
| hsa-miR-1244 | ZNF529   | ZNF529   | - |
| hsa-miR-1244 | ZNF554   | ZNF554   | - |
| hsa-miR-1244 | ZNF605   | ZNF605   | - |
| hsa-miR-1244 | ZNF615   | ZNF615   | - |

|              |          |          |   |
|--------------|----------|----------|---|
| hsa-miR-1244 | ZNF642   | ZNF642   | - |
| hsa-miR-1244 | ZNF652   | ZNF652   | - |
| hsa-miR-1244 | ZNF664   | ZNF664   | - |
| hsa-miR-1244 | ZNF670   | ZNF670   | - |
| hsa-miR-1244 | ZNF676   | ZNF676   | - |
| hsa-miR-1244 | ZNF682   | ZNF682   | - |
| hsa-miR-1244 | ZNF71    | ZNF71    | - |
| hsa-miR-1244 | ZNF770   | ZNF770   | - |
| hsa-miR-1244 | ZNF85    | ZNF85    | - |
| hsa-miR-1244 | ZNHIT6   | ZNHIT6   | - |
| hsa-miR-1244 | ZPLD1    | ZPLD1    | - |
| hsa-miR-1275 | ABCA5    | ABCA5    | - |
| hsa-miR-1275 | ABCC4    | ABCC4    | - |
| hsa-miR-1275 | ABCC6    | ABCC6    | - |
| hsa-miR-1275 | ABCF1    | ABCF1    | - |
| hsa-miR-1275 | ABCF3    | ABCF3    | - |
| hsa-miR-1275 | ABHD4    | ABHD4    | - |
| hsa-miR-1275 | ABHD6    | ABHD6    | - |
| hsa-miR-1275 | ABI2     | ABI2     | - |
| hsa-miR-1275 | ABTB2    | ABTB2    | - |
| hsa-miR-1275 | ACADSB   | ACADSB   | - |
| hsa-miR-1275 | ACBD7    | ACBD7    | - |
| hsa-miR-1275 | ACCN2    | ACCN2    | - |
| hsa-miR-1275 | ACHE     | ACHE     | - |
| hsa-miR-1275 | ACLY     | ACLY     | - |
| hsa-miR-1275 | ACSF2    | ACSF2    | - |
| hsa-miR-1275 | ACSL5    | ACSL5    | - |
| hsa-miR-1275 | ACSS3    | ACSS3    | - |
| hsa-miR-1275 | ACTB     | ACTB     | - |
| hsa-miR-1275 | ACTC1    | ACTC1    | - |
| hsa-miR-1275 | ACTR1A   | ACTR1A   | - |
| hsa-miR-1275 | ADAL     | ADAL     | - |
| hsa-miR-1275 | ADAM11   | ADAM11   | - |
| hsa-miR-1275 | ADAM12   | ADAM12   | - |
| hsa-miR-1275 | ADAM33   | ADAM33   | - |
| hsa-miR-1275 | ADAMTS9  | ADAMTS9  | - |
| hsa-miR-1275 | ADAMTSL4 | ADAMTSL4 | - |
| hsa-miR-1275 | ADAP2    | ADAP2    | - |
| hsa-miR-1275 | ADAR     | ADAR     | - |
| hsa-miR-1275 | ADCY1    | ADCY1    | - |
| hsa-miR-1275 | ADCY2    | ADCY2    | - |
| hsa-miR-1275 | ADIPOQ   | ADIPOQ   | - |
| hsa-miR-1275 | ADORA3   | ADORA3   | - |
| hsa-miR-1275 | ADRA1A   | ADRA1A   | - |
| hsa-miR-1275 | ADRB1    | ADRB1    | - |
| hsa-miR-1275 | ADRB2    | ADRB2    | - |
| hsa-miR-1275 | ADRB3    | ADRB3    | - |
| hsa-miR-1275 | AFAP1    | AFAP1    | - |
| hsa-miR-1275 | AFF3     | AFF3     | - |
| hsa-miR-1275 | AFMID    | AFMID    | - |
| hsa-miR-1275 | AFTPH    | AFTPH    | - |

|              |          |          |   |
|--------------|----------|----------|---|
| hsa-miR-1275 | AGFG2    | AGFG2    | - |
| hsa-miR-1275 | AGGF1    | AGGF1    | - |
| hsa-miR-1275 | AGK      | AGK      | - |
| hsa-miR-1275 | AGPAT6   | AGPAT6   | - |
| hsa-miR-1275 | AGTRAP   | AGTRAP   | - |
| hsa-miR-1275 | AHCY     | AHCY     | - |
| hsa-miR-1275 | AIF1     | AIF1     | - |
| hsa-miR-1275 | AIFM3    | AIFM3    | - |
| hsa-miR-1275 | AIG1     | AIG1     | - |
| hsa-miR-1275 | AKAP11   | AKAP11   | - |
| hsa-miR-1275 | AKAP5    | AKAP5    | - |
| hsa-miR-1275 | AKNAD1   | AKNAD1   | - |
| hsa-miR-1275 | AKR1E2   | AKR1E2   | - |
| hsa-miR-1275 | AKT3     | AKT3     | - |
| hsa-miR-1275 | ALDH1L2  | ALDH1L2  | - |
| hsa-miR-1275 | ALG13    | ALG13    | - |
| hsa-miR-1275 | ALKBH1   | ALKBH1   | - |
| hsa-miR-1275 | ALOX12   | ALOX12   | - |
| hsa-miR-1275 | AMD1     | AMD1     | - |
| hsa-miR-1275 | AMN1     | AMN1     | - |
| hsa-miR-1275 | AMOTL2   | AMOTL2   | - |
| hsa-miR-1275 | AMPH     | AMPH     | - |
| hsa-miR-1275 | ANK2     | ANK2     | - |
| hsa-miR-1275 | ANKH     | ANKH     | - |
| hsa-miR-1275 | ANKLE1   | ANKLE1   | - |
| hsa-miR-1275 | ANKRD13B | ANKRD13B | - |
| hsa-miR-1275 | ANKRD28  | ANKRD28  | - |
| hsa-miR-1275 | ANKRD36B | ANKRD36B | - |
| hsa-miR-1275 | ANO7     | ANO7     | - |
| hsa-miR-1275 | ANTXR1   | ANTXR1   | - |
| hsa-miR-1275 | AP1G1    | AP1G1    | - |
| hsa-miR-1275 | AP2M1    | AP2M1    | - |
| hsa-miR-1275 | APBA1    | APBA1    | - |
| hsa-miR-1275 | APLN     | APLN     | - |
| hsa-miR-1275 | APLNR    | APLNR    | - |
| hsa-miR-1275 | APOBEC3C | APOBEC3C | - |
| hsa-miR-1275 | APOC2    | APOC2    | - |
| hsa-miR-1275 | APPL2    | APPL2    | - |
| hsa-miR-1275 | AQP9     | AQP9     | - |
| hsa-miR-1275 | ARAF     | ARAF     | - |
| hsa-miR-1275 | ARF5     | ARF5     | - |
| hsa-miR-1275 | ARFGAP2  | ARFGAP2  | - |
| hsa-miR-1275 | ARHGAP23 | ARHGAP23 | - |
| hsa-miR-1275 | ARHGAP31 | ARHGAP31 | - |
| hsa-miR-1275 | ARHGAP32 | ARHGAP32 | - |
| hsa-miR-1275 | ARHGAP5  | ARHGAP5  | - |
| hsa-miR-1275 | ARHGDI   | ARHGDI   | - |
| hsa-miR-1275 | ARHGEF10 | ARHGEF10 | - |
| hsa-miR-1275 | ARID1A   | ARID1A   | - |
| hsa-miR-1275 | ARID2    | ARID2    | - |
| hsa-miR-1275 | ARIH1    | ARIH1    | - |



|              |          |          |   |
|--------------|----------|----------|---|
| hsa-miR-1275 | ARL4D    | ARL4D    | - |
| hsa-miR-1275 | ARL5B    | ARL5B    | - |
| hsa-miR-1275 | ARMC6    | ARMC6    | - |
| hsa-miR-1275 | ARNTL    | ARNTL    | - |
| hsa-miR-1275 | ARPC1B   | ARPC1B   | - |
| hsa-miR-1275 | ARPP21   | ARPP21   | - |
| hsa-miR-1275 | ARRB2    | ARRB2    | - |
| hsa-miR-1275 | ARSA     | ARSA     | - |
| hsa-miR-1275 | ARX      | ARX      | - |
| hsa-miR-1275 | ASAP1    | ASAP1    | - |
| hsa-miR-1275 | ASPH     | ASPH     | - |
| hsa-miR-1275 | ASS1     | ASS1     | - |
| hsa-miR-1275 | ASXL1    | ASXL1    | - |
| hsa-miR-1275 | ATAD2B   | ATAD2B   | - |
| hsa-miR-1275 | ATAD3C   | ATAD3C   | - |
| hsa-miR-1275 | ATF3     | ATF3     | - |
| hsa-miR-1275 | ATG16L1  | ATG16L1  | - |
| hsa-miR-1275 | ATMIN    | ATMIN    | - |
| hsa-miR-1275 | ATP10B   | ATP10B   | - |
| hsa-miR-1275 | ATP1B2   | ATP1B2   | - |
| hsa-miR-1275 | ATP2A1   | ATP2A1   | - |
| hsa-miR-1275 | ATP2A3   | ATP2A3   | - |
| hsa-miR-1275 | ATP2B3   | ATP2B3   | - |
| hsa-miR-1275 | ATP6V0B  | ATP6V0B  | - |
| hsa-miR-1275 | ATP6V1A  | ATP6V1A  | - |
| hsa-miR-1275 | ATP7A    | ATP7A    | - |
| hsa-miR-1275 | ATP8B2   | ATP8B2   | - |
| hsa-miR-1275 | ATPAF1   | ATPAF1   | - |
| hsa-miR-1275 | ATPIF1   | ATPIF1   | - |
| hsa-miR-1275 | ATXN1L   | ATXN1L   | - |
| hsa-miR-1275 | ATXN2L   | ATXN2L   | - |
| hsa-miR-1275 | ATXN7L1  | ATXN7L1  | - |
| hsa-miR-1275 | AUP1     | AUP1     | - |
| hsa-miR-1275 | AVPR1A   | AVPR1A   | - |
| hsa-miR-1275 | AWAT1    | AWAT1    | - |
| hsa-miR-1275 | AXIN2    | AXIN2    | - |
| hsa-miR-1275 | B3GNT9   | B3GNT9   | - |
| hsa-miR-1275 | B4GALNT3 | B4GALNT3 | - |
| hsa-miR-1275 | BACE1    | BACE1    | - |
| hsa-miR-1275 | BAD      | BAD      | - |
| hsa-miR-1275 | BAIAP2   | BAIAP2   | - |
| hsa-miR-1275 | BAK1     | BAK1     | - |
| hsa-miR-1275 | BARHL2   | BARHL2   | - |
| hsa-miR-1275 | BAZ1B    | BAZ1B    | - |
| hsa-miR-1275 | BBS1     | BBS1     | - |
| hsa-miR-1275 | BBS12    | BBS12    | - |
| hsa-miR-1275 | BCAM     | BCAM     | - |
| hsa-miR-1275 | BCAP31   | BCAP31   | - |
| hsa-miR-1275 | BCDIN3D  | BCDIN3D  | - |
| hsa-miR-1275 | BCHE     | BCHE     | - |
| hsa-miR-1275 | BCL2L1   | BCL2L1   | - |

|              |           |           |   |
|--------------|-----------|-----------|---|
| hsa-miR-1275 | BCL2L10   | BCL2L10   | - |
| hsa-miR-1275 | BCL2L15   | BCL2L15   | - |
| hsa-miR-1275 | BCL3      | BCL3      | - |
| hsa-miR-1275 | BCL6      | BCL6      | - |
| hsa-miR-1275 | BCL7B     | BCL7B     | - |
| hsa-miR-1275 | BCLAF1    | BCLAF1    | - |
| hsa-miR-1275 | BCORL1    | BCORL1    | - |
| hsa-miR-1275 | BEGAIN    | BEGAIN    | - |
| hsa-miR-1275 | BEND3     | BEND3     | - |
| hsa-miR-1275 | BEST1     | BEST1     | - |
| hsa-miR-1275 | BEST4     | BEST4     | - |
| hsa-miR-1275 | BET1L     | BET1L     | - |
| hsa-miR-1275 | BHLHE41   | BHLHE41   | - |
| hsa-miR-1275 | BLOC1S1   | BLOC1S1   | - |
| hsa-miR-1275 | BMP1      | BMP1      | - |
| hsa-miR-1275 | BMP3      | BMP3      | - |
| hsa-miR-1275 | BMP6      | BMP6      | - |
| hsa-miR-1275 | BNIP3L    | BNIP3L    | - |
| hsa-miR-1275 | BRD4      | BRD4      | - |
| hsa-miR-1275 | BRPF1     | BRPF1     | - |
| hsa-miR-1275 | BSDC1     | BSDC1     | - |
| hsa-miR-1275 | BSN       | BSN       | - |
| hsa-miR-1275 | BSPH1     | BSPH1     | - |
| hsa-miR-1275 | BTG2      | BTG2      | - |
| hsa-miR-1275 | BTN3A1    | BTN3A1    | - |
| hsa-miR-1275 | BTNL9     | BTNL9     | - |
| hsa-miR-1275 | BZRAP1    | BZRAP1    | - |
| hsa-miR-1275 | C10orf10  | C10orf10  | - |
| hsa-miR-1275 | C10orf118 | C10orf118 | - |
| hsa-miR-1275 | C10orf26  | C10orf26  | - |
| hsa-miR-1275 | C10orf46  | C10orf46  | - |
| hsa-miR-1275 | C10orf53  | C10orf53  | - |
| hsa-miR-1275 | C11orf49  | C11orf49  | - |
| hsa-miR-1275 | C11orf57  | C11orf57  | - |
| hsa-miR-1275 | C11orf66  | C11orf66  | - |
| hsa-miR-1275 | C11orf83  | C11orf83  | - |
| hsa-miR-1275 | C11orf84  | C11orf84  | - |
| hsa-miR-1275 | C12orf68  | C12orf68  | - |
| hsa-miR-1275 | C12orf74  | C12orf74  | - |
| hsa-miR-1275 | C12orf75  | C12orf75  | - |
| hsa-miR-1275 | C13orf30  | C13orf30  | - |
| hsa-miR-1275 | C13orf35  | C13orf35  | - |
| hsa-miR-1275 | C13orf38  | C13orf38  | - |
| hsa-miR-1275 | C14orf101 | C14orf101 | - |
| hsa-miR-1275 | C14orf147 | C14orf147 | - |
| hsa-miR-1275 | C14orf159 | C14orf159 | - |
| hsa-miR-1275 | C16orf82  | C16orf82  | - |
| hsa-miR-1275 | C16orf92  | C16orf92  | - |
| hsa-miR-1275 | C17orf102 | C17orf102 | - |
| hsa-miR-1275 | C17orf107 | C17orf107 | - |
| hsa-miR-1275 | C17orf28  | C17orf28  | - |

|              |           |           |   |
|--------------|-----------|-----------|---|
| hsa-miR-1275 | C17orf49  | C17orf49  | - |
| hsa-miR-1275 | C17orf56  | C17orf56  | - |
| hsa-miR-1275 | C17orf57  | C17orf57  | - |
| hsa-miR-1275 | C17orf76  | C17orf76  | - |
| hsa-miR-1275 | C17orf96  | C17orf96  | - |
| hsa-miR-1275 | C18orf10  | C18orf10  | - |
| hsa-miR-1275 | C18orf25  | C18orf25  | - |
| hsa-miR-1275 | C18orf54  | C18orf54  | - |
| hsa-miR-1275 | C19orf12  | C19orf12  | - |
| hsa-miR-1275 | C19orf21  | C19orf21  | - |
| hsa-miR-1275 | C19orf50  | C19orf50  | - |
| hsa-miR-1275 | C19orf63  | C19orf63  | - |
| hsa-miR-1275 | C19orf77  | C19orf77  | - |
| hsa-miR-1275 | C1QTNF1   | C1QTNF1   | - |
| hsa-miR-1275 | C1QTNF3   | C1QTNF3   | - |
| hsa-miR-1275 | C1orf106  | C1orf106  | - |
| hsa-miR-1275 | C1orf115  | C1orf115  | - |
| hsa-miR-1275 | C1orf130  | C1orf130  | - |
| hsa-miR-1275 | C1orf183  | C1orf183  | - |
| hsa-miR-1275 | C1orf190  | C1orf190  | - |
| hsa-miR-1275 | C1orf198  | C1orf198  | - |
| hsa-miR-1275 | C1orf204  | C1orf204  | - |
| hsa-miR-1275 | C1orf212  | C1orf212  | - |
| hsa-miR-1275 | C1orf43   | C1orf43   | - |
| hsa-miR-1275 | C1orf85   | C1orf85   | - |
| hsa-miR-1275 | C1orf86   | C1orf86   | - |
| hsa-miR-1275 | C20orf103 | C20orf103 | - |
| hsa-miR-1275 | C2orf57   | C2orf57   | - |
| hsa-miR-1275 | C2orf72   | C2orf72   | - |
| hsa-miR-1275 | C3        | C3        | - |
| hsa-miR-1275 | C4orf41   | C4orf41   | - |
| hsa-miR-1275 | C5AR1     | C5AR1     | - |
| hsa-miR-1275 | C5orf13   | C5orf13   | - |
| hsa-miR-1275 | C5orf15   | C5orf15   | - |
| hsa-miR-1275 | C5orf22   | C5orf22   | - |
| hsa-miR-1275 | C5orf24   | C5orf24   | - |
| hsa-miR-1275 | C5orf41   | C5orf41   | - |
| hsa-miR-1275 | C5orf51   | C5orf51   | - |
| hsa-miR-1275 | C6orf141  | C6orf141  | - |
| hsa-miR-1275 | C6orf146  | C6orf146  | - |
| hsa-miR-1275 | C6orf223  | C6orf223  | - |
| hsa-miR-1275 | C7orf52   | C7orf52   | - |
| hsa-miR-1275 | C7orf60   | C7orf60   | - |
| hsa-miR-1275 | C9orf171  | C9orf171  | - |
| hsa-miR-1275 | C9orf173  | C9orf173  | - |
| hsa-miR-1275 | C9orf57   | C9orf57   | - |
| hsa-miR-1275 | C9orf91   | C9orf91   | - |
| hsa-miR-1275 | CA10      | CA10      | - |
| hsa-miR-1275 | CA13      | CA13      | - |
| hsa-miR-1275 | CABP7     | CABP7     | - |
| hsa-miR-1275 | CACNA1D   | CACNA1D   | - |

|              |          |          |   |
|--------------|----------|----------|---|
| hsa-miR-1275 | CACNA1I  | CACNA1I  | - |
| hsa-miR-1275 | CACNA2D2 | CACNA2D2 | - |
| hsa-miR-1275 | CACNB1   | CACNB1   | - |
| hsa-miR-1275 | CADM2    | CADM2    | - |
| hsa-miR-1275 | CADM4    | CADM4    | - |
| hsa-miR-1275 | CALB2    | CALB2    | - |
| hsa-miR-1275 | CALCOCO1 | CALCOCO1 | - |
| hsa-miR-1275 | CALD1    | CALD1    | - |
| hsa-miR-1275 | CALR     | CALR     | - |
| hsa-miR-1275 | CAMK2N1  | CAMK2N1  | - |
| hsa-miR-1275 | CAMKK2   | CAMKK2   | - |
| hsa-miR-1275 | CAMLG    | CAMLG    | - |
| hsa-miR-1275 | CAMTA1   | CAMTA1   | - |
| hsa-miR-1275 | CAPN11   | CAPN11   | - |
| hsa-miR-1275 | CAPN5    | CAPN5    | - |
| hsa-miR-1275 | CARD11   | CARD11   | - |
| hsa-miR-1275 | CASKIN2  | CASKIN2  | - |
| hsa-miR-1275 | CASQ1    | CASQ1    | - |
| hsa-miR-1275 | CASZ1    | CASZ1    | - |
| hsa-miR-1275 | CBFA2T2  | CBFA2T2  | - |
| hsa-miR-1275 | CBFA2T3  | CBFA2T3  | - |
| hsa-miR-1275 | CBLN1    | CBLN1    | - |
| hsa-miR-1275 | CBLN3    | CBLN3    | - |
| hsa-miR-1275 | CC2D1B   | CC2D1B   | - |
| hsa-miR-1275 | CCDC101  | CCDC101  | - |
| hsa-miR-1275 | CCDC113  | CCDC113  | - |
| hsa-miR-1275 | CCDC114  | CCDC114  | - |
| hsa-miR-1275 | CCDC117  | CCDC117  | - |
| hsa-miR-1275 | CCDC13   | CCDC13   | - |
| hsa-miR-1275 | CCDC141  | CCDC141  | - |
| hsa-miR-1275 | CCDC155  | CCDC155  | - |
| hsa-miR-1275 | CCDC3    | CCDC3    | - |
| hsa-miR-1275 | CCDC33   | CCDC33   | - |
| hsa-miR-1275 | CCDC86   | CCDC86   | - |
| hsa-miR-1275 | CCDC88C  | CCDC88C  | - |
| hsa-miR-1275 | CCL1     | CCL1     | - |
| hsa-miR-1275 | CCL22    | CCL22    | - |
| hsa-miR-1275 | CCL27    | CCL27    | - |
| hsa-miR-1275 | CCL8     | CCL8     | - |
| hsa-miR-1275 | CCNF     | CCNF     | - |
| hsa-miR-1275 | CD1C     | CD1C     | - |
| hsa-miR-1275 | CD209    | CD209    | - |
| hsa-miR-1275 | CD34     | CD34     | - |
| hsa-miR-1275 | CD3E     | CD3E     | - |
| hsa-miR-1275 | CD40LG   | CD40LG   | - |
| hsa-miR-1275 | CD44     | CD44     | - |
| hsa-miR-1275 | CD7      | CD7      | - |
| hsa-miR-1275 | CD72     | CD72     | - |
| hsa-miR-1275 | CD74     | CD74     | - |
| hsa-miR-1275 | CD79A    | CD79A    | - |
| hsa-miR-1275 | CD80     | CD80     | - |

|              |          |          |   |
|--------------|----------|----------|---|
| hsa-miR-1275 | CD8B     | CD8B     | - |
| hsa-miR-1275 | CD99     | CD99     | - |
| hsa-miR-1275 | CDADC1   | CDADC1   | - |
| hsa-miR-1275 | CDH22    | CDH22    | - |
| hsa-miR-1275 | CDHR5    | CDHR5    | - |
| hsa-miR-1275 | CDK18    | CDK18    | - |
| hsa-miR-1275 | CDK5RAP2 | CDK5RAP2 | - |
| hsa-miR-1275 | CDK9     | CDK9     | - |
| hsa-miR-1275 | CDKAL1   | CDKAL1   | - |
| hsa-miR-1275 | CDKN2A   | CDKN2A   | - |
| hsa-miR-1275 | CDKN2C   | CDKN2C   | - |
| hsa-miR-1275 | CDS2     | CDS2     | - |
| hsa-miR-1275 | CDYL2    | CDYL2    | - |
| hsa-miR-1275 | CEACAM19 | CEACAM19 | - |
| hsa-miR-1275 | CEBPG    | CEBPG    | - |
| hsa-miR-1275 | CELF3    | CELF3    | - |
| hsa-miR-1275 | CELF6    | CELF6    | - |
| hsa-miR-1275 | CEP63    | CEP63    | - |
| hsa-miR-1275 | CERCAM   | CERCAM   | - |
| hsa-miR-1275 | CETN2    | CETN2    | - |
| hsa-miR-1275 | CFLAR    | CFLAR    | - |
| hsa-miR-1275 | CHAD     | CHAD     | - |
| hsa-miR-1275 | CHAF1A   | CHAF1A   | - |
| hsa-miR-1275 | CHCHD8   | CHCHD8   | - |
| hsa-miR-1275 | CHPF     | CHPF     | - |
| hsa-miR-1275 | CHRNA3   | CHRNA3   | - |
| hsa-miR-1275 | CHRNA6   | CHRNA6   | - |
| hsa-miR-1275 | CHRNB4   | CHRNB4   | - |
| hsa-miR-1275 | CHST14   | CHST14   | - |
| hsa-miR-1275 | CHUK     | CHUK     | - |
| hsa-miR-1275 | CIB2     | CIB2     | - |
| hsa-miR-1275 | CIDEB    | CIDEB    | - |
| hsa-miR-1275 | CITED4   | CITED4   | - |
| hsa-miR-1275 | CLCNKA   | CLCNKA   | - |
| hsa-miR-1275 | CLCNKB   | CLCNKB   | - |
| hsa-miR-1275 | CLDN1    | CLDN1    | - |
| hsa-miR-1275 | CLDN11   | CLDN11   | - |
| hsa-miR-1275 | CLDN2    | CLDN2    | - |
| hsa-miR-1275 | CLDN9    | CLDN9    | - |
| hsa-miR-1275 | CLEC12B  | CLEC12B  | - |
| hsa-miR-1275 | CLEC16A  | CLEC16A  | - |
| hsa-miR-1275 | CLEC2D   | CLEC2D   | - |
| hsa-miR-1275 | CLEC4D   | CLEC4D   | - |
| hsa-miR-1275 | CLEC4M   | CLEC4M   | - |
| hsa-miR-1275 | CLEC5A   | CLEC5A   | - |
| hsa-miR-1275 | CLECL1   | CLECL1   | - |
| hsa-miR-1275 | CLIP2    | CLIP2    | - |
| hsa-miR-1275 | CLIP3    | CLIP3    | - |
| hsa-miR-1275 | CLPB     | CLPB     | - |
| hsa-miR-1275 | CLVS1    | CLVS1    | - |
| hsa-miR-1275 | CMIP     | CMIP     | - |

|              |          |          |   |
|--------------|----------|----------|---|
| hsa-miR-1275 | CNDP1    | CNDP1    | - |
| hsa-miR-1275 | CNDP2    | CNDP2    | - |
| hsa-miR-1275 | CNGA2    | CNGA2    | - |
| hsa-miR-1275 | CNIH2    | CNIH2    | - |
| hsa-miR-1275 | CNKSR1   | CNKSR1   | - |
| hsa-miR-1275 | CNN2     | CNN2     | - |
| hsa-miR-1275 | CNNM1    | CNNM1    | - |
| hsa-miR-1275 | CNOT1    | CNOT1    | - |
| hsa-miR-1275 | CNOT2    | CNOT2    | - |
| hsa-miR-1275 | CNST     | CNST     | - |
| hsa-miR-1275 | CNTLN    | CNTLN    | - |
| hsa-miR-1275 | CNTNAP1  | CNTNAP1  | - |
| hsa-miR-1275 | COG5     | COG5     | - |
| hsa-miR-1275 | COL19A1  | COL19A1  | - |
| hsa-miR-1275 | COL1A2   | COL1A2   | - |
| hsa-miR-1275 | COL23A1  | COL23A1  | - |
| hsa-miR-1275 | COL4A3BP | COL4A3BP | - |
| hsa-miR-1275 | COL5A3   | COL5A3   | - |
| hsa-miR-1275 | COL6A2   | COL6A2   | - |
| hsa-miR-1275 | COL6A3   | COL6A3   | - |
| hsa-miR-1275 | COL8A2   | COL8A2   | - |
| hsa-miR-1275 | COL9A2   | COL9A2   | - |
| hsa-miR-1275 | COPG     | COPG     | - |
| hsa-miR-1275 | COQ7     | COQ7     | - |
| hsa-miR-1275 | CPEB4    | CPEB4    | - |
| hsa-miR-1275 | CPLX3    | CPLX3    | - |
| hsa-miR-1275 | CPN2     | CPN2     | - |
| hsa-miR-1275 | CPS1     | CPS1     | - |
| hsa-miR-1275 | CPSF7    | CPSF7    | - |
| hsa-miR-1275 | CRABP1   | CRABP1   | - |
| hsa-miR-1275 | CREBBP   | CREBBP   | - |
| hsa-miR-1275 | CREBL2   | CREBL2   | - |
| hsa-miR-1275 | CRISP2   | CRISP2   | - |
| hsa-miR-1275 | CRK      | CRK      | - |
| hsa-miR-1275 | CRTAP    | CRTAP    | - |
| hsa-miR-1275 | CRTC2    | CRTC2    | - |
| hsa-miR-1275 | CRYBB1   | CRYBB1   | - |
| hsa-miR-1275 | CRYZ     | CRYZ     | - |
| hsa-miR-1275 | CSF1R    | CSF1R    | - |
| hsa-miR-1275 | CSF2RB   | CSF2RB   | - |
| hsa-miR-1275 | CSMD1    | CSMD1    | - |
| hsa-miR-1275 | CSMD3    | CSMD3    | - |
| hsa-miR-1275 | CSNK2B   | CSNK2B   | - |
| hsa-miR-1275 | CTBS     | CTBS     | - |
| hsa-miR-1275 | CTNND1   | CTNND1   | - |
| hsa-miR-1275 | CTNND2   | CTNND2   | - |
| hsa-miR-1275 | CTSB     | CTSB     | - |
| hsa-miR-1275 | CTSS     | CTSS     | - |
| hsa-miR-1275 | CUX1     | CUX1     | - |
| hsa-miR-1275 | CX3CR1   | CX3CR1   | - |
| hsa-miR-1275 | CXADR    | CXADR    | - |

|              |         |         |   |
|--------------|---------|---------|---|
| hsa-miR-1275 | CXCL16  | CXCL16  | - |
| hsa-miR-1275 | CYB5B   | CYB5B   | - |
| hsa-miR-1275 | CYBASC3 | CYBASC3 | - |
| hsa-miR-1275 | CYFIP2  | CYFIP2  | - |
| hsa-miR-1275 | CYP11B1 | CYP11B1 | - |
| hsa-miR-1275 | CYP11B2 | CYP11B2 | - |
| hsa-miR-1275 | CYP27B1 | CYP27B1 | - |
| hsa-miR-1275 | CYP2B6  | CYP2B6  | - |
| hsa-miR-1275 | CYP2F1  | CYP2F1  | - |
| hsa-miR-1275 | CYP2U1  | CYP2U1  | - |
| hsa-miR-1275 | DAB2IP  | DAB2IP  | - |
| hsa-miR-1275 | DAG1    | DAG1    | - |
| hsa-miR-1275 | DAGLA   | DAGLA   | - |
| hsa-miR-1275 | DAK     | DAK     | - |
| hsa-miR-1275 | DAZAP2  | DAZAP2  | - |
| hsa-miR-1275 | DBN1    | DBN1    | - |
| hsa-miR-1275 | DCLK1   | DCLK1   | - |
| hsa-miR-1275 | DCP1A   | DCP1A   | - |
| hsa-miR-1275 | DCT     | DCT     | - |
| hsa-miR-1275 | DCTN1   | DCTN1   | - |
| hsa-miR-1275 | DCTN2   | DCTN2   | - |
| hsa-miR-1275 | DCUN1D3 | DCUN1D3 | - |
| hsa-miR-1275 | DDA1    | DDA1    | - |
| hsa-miR-1275 | DDIT3   | DDIT3   | - |
| hsa-miR-1275 | DDIT4   | DDIT4   | - |
| hsa-miR-1275 | DDX17   | DDX17   | - |
| hsa-miR-1275 | DDX19A  | DDX19A  | - |
| hsa-miR-1275 | DEC1    | DEC1    | - |
| hsa-miR-1275 | DEF8    | DEF8    | - |
| hsa-miR-1275 | DENND3  | DENND3  | - |
| hsa-miR-1275 | DENND4B | DENND4B | - |
| hsa-miR-1275 | DERL1   | DERL1   | - |
| hsa-miR-1275 | DEXI    | DEXI    | - |
| hsa-miR-1275 | DFNB31  | DFNB31  | - |
| hsa-miR-1275 | DGKE    | DGKE    | - |
| hsa-miR-1275 | DHDDS   | DHDDS   | - |
| hsa-miR-1275 | DHH     | DHH     | - |
| hsa-miR-1275 | DIP2B   | DIP2B   | - |
| hsa-miR-1275 | DIRAS2  | DIRAS2  | - |
| hsa-miR-1275 | DLG4    | DLG4    | - |
| hsa-miR-1275 | DLGAP3  | DLGAP3  | - |
| hsa-miR-1275 | DLX2    | DLX2    | - |
| hsa-miR-1275 | DLX3    | DLX3    | - |
| hsa-miR-1275 | DLX4    | DLX4    | - |
| hsa-miR-1275 | DLX6    | DLX6    | - |
| hsa-miR-1275 | DMRTB1  | DMRTB1  | - |
| hsa-miR-1275 | DMWD    | DMWD    | - |
| hsa-miR-1275 | DNAJB12 | DNAJB12 | - |
| hsa-miR-1275 | DNAJB14 | DNAJB14 | - |
| hsa-miR-1275 | DNAJB2  | DNAJB2  | - |
| hsa-miR-1275 | DNAJC14 | DNAJC14 | - |

|              |          |          |   |
|--------------|----------|----------|---|
| hsa-miR-1275 | DNAJC16  | DNAJC16  | - |
| hsa-miR-1275 | DNAJC6   | DNAJC6   | - |
| hsa-miR-1275 | DNAL4    | DNAL4    | - |
| hsa-miR-1275 | DNASE1L1 | DNASE1L1 | - |
| hsa-miR-1275 | DNM2     | DNM2     | - |
| hsa-miR-1275 | DNM3     | DNM3     | - |
| hsa-miR-1275 | DNMT3B   | DNMT3B   | - |
| hsa-miR-1275 | DOC2A    | DOC2A    | - |
| hsa-miR-1275 | DOK1     | DOK1     | - |
| hsa-miR-1275 | DPH2     | DPH2     | - |
| hsa-miR-1275 | DPPA4    | DPPA4    | - |
| hsa-miR-1275 | DR1      | DR1      | - |
| hsa-miR-1275 | DSC3     | DSC3     | - |
| hsa-miR-1275 | DSCAML1  | DSCAML1  | - |
| hsa-miR-1275 | DSEL     | DSEL     | - |
| hsa-miR-1275 | DSG3     | DSG3     | - |
| hsa-miR-1275 | DTD1     | DTD1     | - |
| hsa-miR-1275 | DTNA     | DTNA     | - |
| hsa-miR-1275 | DTNB     | DTNB     | - |
| hsa-miR-1275 | DTX3     | DTX3     | - |
| hsa-miR-1275 | DUSP8    | DUSP8    | - |
| hsa-miR-1275 | DUSP9    | DUSP9    | - |
| hsa-miR-1275 | DVL3     | DVL3     | - |
| hsa-miR-1275 | DYNC1LI2 | DYNC1LI2 | - |
| hsa-miR-1275 | DYNLRB1  | DYNLRB1  | - |
| hsa-miR-1275 | DYRK1A   | DYRK1A   | - |
| hsa-miR-1275 | DYRK1B   | DYRK1B   | - |
| hsa-miR-1275 | DYRK2    | DYRK2    | - |
| hsa-miR-1275 | DYSF     | DYSF     | - |
| hsa-miR-1275 | DYX1C1   | DYX1C1   | - |
| hsa-miR-1275 | E2F4     | E2F4     | - |
| hsa-miR-1275 | EBF1     | EBF1     | - |
| hsa-miR-1275 | EBF4     | EBF4     | - |
| hsa-miR-1275 | EDN1     | EDN1     | - |
| hsa-miR-1275 | EFHA2    | EFHA2    | - |
| hsa-miR-1275 | EFHD1    | EFHD1    | - |
| hsa-miR-1275 | EFNA3    | EFNA3    | - |
| hsa-miR-1275 | EFNA4    | EFNA4    | - |
| hsa-miR-1275 | EFR3B    | EFR3B    | - |
| hsa-miR-1275 | EFTUD2   | EFTUD2   | - |
| hsa-miR-1275 | EGFR     | EGFR     | - |
| hsa-miR-1275 | EGR3     | EGR3     | - |
| hsa-miR-1275 | EHBP1    | EHBP1    | - |
| hsa-miR-1275 | EI24     | EI24     | - |
| hsa-miR-1275 | EIF2AK2  | EIF2AK2  | - |
| hsa-miR-1275 | EIF2AK3  | EIF2AK3  | - |
| hsa-miR-1275 | EIF2S2   | EIF2S2   | - |
| hsa-miR-1275 | EIF5AL1  | EIF5AL1  | - |
| hsa-miR-1275 | ELK1     | ELK1     | - |
| hsa-miR-1275 | ELK4     | ELK4     | - |
| hsa-miR-1275 | ELL      | ELL      | - |



|              |          |          |   |
|--------------|----------|----------|---|
| hsa-miR-1275 | ELMO2    | ELMO2    | - |
| hsa-miR-1275 | ELOVL2   | ELOVL2   | - |
| hsa-miR-1275 | EMILIN1  | EMILIN1  | - |
| hsa-miR-1275 | EMILIN3  | EMILIN3  | - |
| hsa-miR-1275 | EN1      | EN1      | - |
| hsa-miR-1275 | ENC1     | ENC1     | - |
| hsa-miR-1275 | ENDOD1   | ENDOD1   | - |
| hsa-miR-1275 | ENDOU    | ENDOU    | - |
| hsa-miR-1275 | ENKUR    | ENKUR    | - |
| hsa-miR-1275 | ENTPD2   | ENTPD2   | - |
| hsa-miR-1275 | EPB41L1  | EPB41L1  | - |
| hsa-miR-1275 | EPB41L4A | EPB41L4A | - |
| hsa-miR-1275 | EPB41L4B | EPB41L4B | - |
| hsa-miR-1275 | EPHB4    | EPHB4    | - |
| hsa-miR-1275 | EPM2A    | EPM2A    | - |
| hsa-miR-1275 | EPN2     | EPN2     | - |
| hsa-miR-1275 | EPS8L1   | EPS8L1   | - |
| hsa-miR-1275 | EREG     | EREG     | - |
| hsa-miR-1275 | ERN2     | ERN2     | - |
| hsa-miR-1275 | ESRP2    | ESRP2    | - |
| hsa-miR-1275 | ESRRB    | ESRRB    | - |
| hsa-miR-1275 | ETNK1    | ETNK1    | - |
| hsa-miR-1275 | ETS1     | ETS1     | - |
| hsa-miR-1275 | EXOC8    | EXOC8    | - |
| hsa-miR-1275 | EXOG     | EXOG     | - |
| hsa-miR-1275 | EXOSC3   | EXOSC3   | - |
| hsa-miR-1275 | EXTL1    | EXTL1    | - |
| hsa-miR-1275 | EZH1     | EZH1     | - |
| hsa-miR-1275 | F12      | F12      | - |
| hsa-miR-1275 | F2RL1    | F2RL1    | - |
| hsa-miR-1275 | F7       | F7       | - |
| hsa-miR-1275 | FAAH     | FAAH     | - |
| hsa-miR-1275 | FADS2    | FADS2    | - |
| hsa-miR-1275 | FAIM3    | FAIM3    | - |
| hsa-miR-1275 | FAM102A  | FAM102A  | - |
| hsa-miR-1275 | FAM110A  | FAM110A  | - |
| hsa-miR-1275 | FAM115A  | FAM115A  | - |
| hsa-miR-1275 | FAM117A  | FAM117A  | - |
| hsa-miR-1275 | FAM120A  | FAM120A  | - |
| hsa-miR-1275 | FAM123A  | FAM123A  | - |
| hsa-miR-1275 | FAM123B  | FAM123B  | - |
| hsa-miR-1275 | FAM127B  | FAM127B  | - |
| hsa-miR-1275 | FAM134C  | FAM134C  | - |
| hsa-miR-1275 | FAM155B  | FAM155B  | - |
| hsa-miR-1275 | FAM169A  | FAM169A  | - |
| hsa-miR-1275 | FAM174B  | FAM174B  | - |
| hsa-miR-1275 | FAM189A1 | FAM189A1 | - |
| hsa-miR-1275 | FAM189B  | FAM189B  | - |
| hsa-miR-1275 | FAM196A  | FAM196A  | - |
| hsa-miR-1275 | FAM22A   | FAM22A   | - |
| hsa-miR-1275 | FAM26E   | FAM26E   | - |

|              |          |          |   |
|--------------|----------|----------|---|
| hsa-miR-1275 | FAM40A   | FAM40A   | - |
| hsa-miR-1275 | FAM40B   | FAM40B   | - |
| hsa-miR-1275 | FAM50B   | FAM50B   | - |
| hsa-miR-1275 | FAM57B   | FAM57B   | - |
| hsa-miR-1275 | FAM60A   | FAM60A   | - |
| hsa-miR-1275 | FAM65A   | FAM65A   | - |
| hsa-miR-1275 | FAM72B   | FAM72B   | - |
| hsa-miR-1275 | FAM72D   | FAM72D   | - |
| hsa-miR-1275 | FAM83A   | FAM83A   | - |
| hsa-miR-1275 | FAM86A   | FAM86A   | - |
| hsa-miR-1275 | FAM86B1  | FAM86B1  | - |
| hsa-miR-1275 | FAS      | FAS      | - |
| hsa-miR-1275 | FAT1     | FAT1     | - |
| hsa-miR-1275 | FAT2     | FAT2     | - |
| hsa-miR-1275 | FBLIM1   | FBLIM1   | - |
| hsa-miR-1275 | FBN1     | FBN1     | - |
| hsa-miR-1275 | FBRS     | FBRS     | - |
| hsa-miR-1275 | FBXL2    | FBXL2    | - |
| hsa-miR-1275 | FBXO10   | FBXO10   | - |
| hsa-miR-1275 | FBXO11   | FBXO11   | - |
| hsa-miR-1275 | FBXO24   | FBXO24   | - |
| hsa-miR-1275 | FBXO43   | FBXO43   | - |
| hsa-miR-1275 | FBXO44   | FBXO44   | - |
| hsa-miR-1275 | FBXW11   | FBXW11   | - |
| hsa-miR-1275 | FBXW8    | FBXW8    | - |
| hsa-miR-1275 | FCGR2C   | FCGR2C   | - |
| hsa-miR-1275 | FERMT3   | FERMT3   | - |
| hsa-miR-1275 | FGF1     | FGF1     | - |
| hsa-miR-1275 | FGF19    | FGF19    | - |
| hsa-miR-1275 | FGFBP1   | FGFBP1   | - |
| hsa-miR-1275 | FGFRL1   | FGFRL1   | - |
| hsa-miR-1275 | FHIT     | FHIT     | - |
| hsa-miR-1275 | FIBIN    | FIBIN    | - |
| hsa-miR-1275 | FILIP1L  | FILIP1L  | - |
| hsa-miR-1275 | FKBP1A   | FKBP1A   | - |
| hsa-miR-1275 | FKBP3    | FKBP3    | - |
| hsa-miR-1275 | FKBP5    | FKBP5    | - |
| hsa-miR-1275 | FKBP8    | FKBP8    | - |
| hsa-miR-1275 | FLJ25363 | FLJ25363 | - |
| hsa-miR-1275 | FLJ43860 | FLJ43860 | - |
| hsa-miR-1275 | FLOT2    | FLOT2    | - |
| hsa-miR-1275 | FLYWCH1  | FLYWCH1  | - |
| hsa-miR-1275 | FMN1     | FMN1     | - |
| hsa-miR-1275 | FMNL1    | FMNL1    | - |
| hsa-miR-1275 | FMO2     | FMO2     | - |
| hsa-miR-1275 | FN3K     | FN3K     | - |
| hsa-miR-1275 | FNBP1L   | FNBP1L   | - |
| hsa-miR-1275 | FNDC7    | FNDC7    | - |
| hsa-miR-1275 | FOSB     | FOSB     | - |
| hsa-miR-1275 | FOSL1    | FOSL1    | - |
| hsa-miR-1275 | FOXA1    | FOXA1    | - |

|              |         |         |   |
|--------------|---------|---------|---|
| hsa-miR-1275 | FOXA3   | FOXA3   | - |
| hsa-miR-1275 | FOXC1   | FOXC1   | - |
| hsa-miR-1275 | FOX E1  | FOX E1  | - |
| hsa-miR-1275 | FOXN1   | FOXN1   | - |
| hsa-miR-1275 | FOXO4   | FOXO4   | - |
| hsa-miR-1275 | FOXP3   | FOXP3   | - |
| hsa-miR-1275 | FPGS    | FPGS    | - |
| hsa-miR-1275 | FRAS1   | FRAS1   | - |
| hsa-miR-1275 | FRMD8   | FRMD8   | - |
| hsa-miR-1275 | FST     | FST     | - |
| hsa-miR-1275 | FSTL1   | FSTL1   | - |
| hsa-miR-1275 | FTO     | FTO     | - |
| hsa-miR-1275 | FTSJD2  | FTSJD2  | - |
| hsa-miR-1275 | FUCA2   | FUCA2   | - |
| hsa-miR-1275 | FUK     | FUK     | - |
| hsa-miR-1275 | FXYD5   | FXYD5   | - |
| hsa-miR-1275 | FXYD6   | FXYD6   | - |
| hsa-miR-1275 | FXYD7   | FXYD7   | - |
| hsa-miR-1275 | FZD5    | FZD5    | - |
| hsa-miR-1275 | G3BP2   | G3BP2   | - |
| hsa-miR-1275 | G6PC2   | G6PC2   | - |
| hsa-miR-1275 | GABRA3  | GABRA3  | - |
| hsa-miR-1275 | GABRP   | GABRP   | - |
| hsa-miR-1275 | GABRQ   | GABRQ   | - |
| hsa-miR-1275 | GAD2    | GAD2    | - |
| hsa-miR-1275 | GAL3ST3 | GAL3ST3 | - |
| hsa-miR-1275 | GAL3ST4 | GAL3ST4 | - |
| hsa-miR-1275 | GALNS   | GALNS   | - |
| hsa-miR-1275 | GANAB   | GANAB   | - |
| hsa-miR-1275 | GAPDH   | GAPDH   | - |
| hsa-miR-1275 | GATAD2B | GATAD2B | - |
| hsa-miR-1275 | GATS    | GATS    | - |
| hsa-miR-1275 | GATSL3  | GATSL3  | - |
| hsa-miR-1275 | GCET2   | GCET2   | - |
| hsa-miR-1275 | GCM1    | GCM1    | - |
| hsa-miR-1275 | GCOM1   | GCOM1   | - |
| hsa-miR-1275 | GDF11   | GDF11   | - |
| hsa-miR-1275 | GDF6    | GDF6    | - |
| hsa-miR-1275 | GDI1    | GDI1    | - |
| hsa-miR-1275 | GEM     | GEM     | - |
| hsa-miR-1275 | GFRA1   | GFRA1   | - |
| hsa-miR-1275 | GGT7    | GGT7    | - |
| hsa-miR-1275 | GHRH    | GHRH    | - |
| hsa-miR-1275 | GIMAP6  | GIMAP6  | - |
| hsa-miR-1275 | GINS4   | GINS4   | - |
| hsa-miR-1275 | GIT1    | GIT1    | - |
| hsa-miR-1275 | GIT2    | GIT2    | - |
| hsa-miR-1275 | GJB7    | GJB7    | - |
| hsa-miR-1275 | GJD3    | GJD3    | - |
| hsa-miR-1275 | GLDN    | GLDN    | - |
| hsa-miR-1275 | GLI3    | GLI3    | - |

|              |         |         |   |
|--------------|---------|---------|---|
| hsa-miR-1275 | GLP1R   | GLP1R   | - |
| hsa-miR-1275 | GLYR1   | GLYR1   | - |
| hsa-miR-1275 | GMEB2   | GMEB2   | - |
| hsa-miR-1275 | GNAI2   | GNAI2   | - |
| hsa-miR-1275 | GNAO1   | GNAO1   | - |
| hsa-miR-1275 | GNAS    | GNAS    | - |
| hsa-miR-1275 | GNE     | GNE     | - |
| hsa-miR-1275 | GNG2    | GNG2    | - |
| hsa-miR-1275 | GNPDA1  | GNPDA1  | - |
| hsa-miR-1275 | GOLGB1  | GOLGB1  | - |
| hsa-miR-1275 | GOLPH3L | GOLPH3L | - |
| hsa-miR-1275 | GORASP1 | GORASP1 | - |
| hsa-miR-1275 | GPBP1   | GPBP1   | - |
| hsa-miR-1275 | GPC4    | GPC4    | - |
| hsa-miR-1275 | GPKOW   | GPKOW   | - |
| hsa-miR-1275 | GPN1    | GPN1    | - |
| hsa-miR-1275 | GPR12   | GPR12   | - |
| hsa-miR-1275 | GPR126  | GPR126  | - |
| hsa-miR-1275 | GPR172B | GPR172B | - |
| hsa-miR-1275 | GPR3    | GPR3    | - |
| hsa-miR-1275 | GPR44   | GPR44   | - |
| hsa-miR-1275 | GPSM1   | GPSM1   | - |
| hsa-miR-1275 | GRAMD1A | GRAMD1A | - |
| hsa-miR-1275 | GRIA1   | GRIA1   | - |
| hsa-miR-1275 | GRIA4   | GRIA4   | - |
| hsa-miR-1275 | GRIK2   | GRIK2   | - |
| hsa-miR-1275 | GRIK5   | GRIK5   | - |
| hsa-miR-1275 | GRIN3A  | GRIN3A  | - |
| hsa-miR-1275 | GRINL1A | GRINL1A | - |
| hsa-miR-1275 | GRIP1   | GRIP1   | - |
| hsa-miR-1275 | GRM3    | GRM3    | - |
| hsa-miR-1275 | GRPEL1  | GRPEL1  | - |
| hsa-miR-1275 | GSK3A   | GSK3A   | - |
| hsa-miR-1275 | GSPT1   | GSPT1   | - |
| hsa-miR-1275 | GSS     | GSS     | - |
| hsa-miR-1275 | GTF3C4  | GTF3C4  | - |
| hsa-miR-1275 | GTPBP2  | GTPBP2  | - |
| hsa-miR-1275 | GTPBP5  | GTPBP5  | - |
| hsa-miR-1275 | GUCA1B  | GUCA1B  | - |
| hsa-miR-1275 | GXYLT2  | GXYLT2  | - |
| hsa-miR-1275 | GYLTL1B | GYLTL1B | - |
| hsa-miR-1275 | GYPE    | GYPE    | - |
| hsa-miR-1275 | GYS2    | GYS2    | - |
| hsa-miR-1275 | H1FNT   | H1FNT   | - |
| hsa-miR-1275 | H1FX    | H1FX    | - |
| hsa-miR-1275 | HABP2   | HABP2   | - |
| hsa-miR-1275 | HAL     | HAL     | - |
| hsa-miR-1275 | HAP1    | HAP1    | - |
| hsa-miR-1275 | HAPLN4  | HAPLN4  | - |
| hsa-miR-1275 | HAUS2   | HAUS2   | - |
| hsa-miR-1275 | HAUS6   | HAUS6   | - |

|              |         |         |   |
|--------------|---------|---------|---|
| hsa-miR-1275 | HCK     | HCK     | - |
| hsa-miR-1275 | HCN2    | HCN2    | - |
| hsa-miR-1275 | HCP5    | HCP5    | - |
| hsa-miR-1275 | HDAC7   | HDAC7   | - |
| hsa-miR-1275 | HDHD3   | HDHD3   | - |
| hsa-miR-1275 | HEATR3  | HEATR3  | - |
| hsa-miR-1275 | HECW2   | HECW2   | - |
| hsa-miR-1275 | HEXA    | HEXA    | - |
| hsa-miR-1275 | HEYL    | HEYL    | - |
| hsa-miR-1275 | HHLA2   | HHLA2   | - |
| hsa-miR-1275 | HIF3A   | HIF3A   | - |
| hsa-miR-1275 | HK1     | HK1     | - |
| hsa-miR-1275 | HMGA1   | HMGA1   | - |
| hsa-miR-1275 | HMGB3   | HMGB3   | - |
| hsa-miR-1275 | HMGN5   | HMGN5   | - |
| hsa-miR-1275 | HMGXB3  | HMGXB3  | - |
| hsa-miR-1275 | HMHA1   | HMHA1   | - |
| hsa-miR-1275 | HMP19   | HMP19   | - |
| hsa-miR-1275 | HMX2    | HMX2    | - |
| hsa-miR-1275 | HNRNPAB | HNRNPAB | - |
| hsa-miR-1275 | HNRNPD  | HNRNPD  | - |
| hsa-miR-1275 | HNRNPK  | HNRNPK  | - |
| hsa-miR-1275 | HOMEZ   | HOMEZ   | - |
| hsa-miR-1275 | HOOK3   | HOOK3   | - |
| hsa-miR-1275 | HOXA11  | HOXA11  | - |
| hsa-miR-1275 | HOXA13  | HOXA13  | - |
| hsa-miR-1275 | HOXA3   | HOXA3   | - |
| hsa-miR-1275 | HOXA4   | HOXA4   | - |
| hsa-miR-1275 | HOXB13  | HOXB13  | - |
| hsa-miR-1275 | HOXB3   | HOXB3   | - |
| hsa-miR-1275 | HOXB4   | HOXB4   | - |
| hsa-miR-1275 | HOXB5   | HOXB5   | - |
| hsa-miR-1275 | HOXC10  | HOXC10  | - |
| hsa-miR-1275 | HOXC5   | HOXC5   | - |
| hsa-miR-1275 | HOXC8   | HOXC8   | - |
| hsa-miR-1275 | HOXD9   | HOXD9   | - |
| hsa-miR-1275 | HP1BP3  | HP1BP3  | - |
| hsa-miR-1275 | HPGDS   | HPGDS   | - |
| hsa-miR-1275 | HR      | HR      | - |
| hsa-miR-1275 | HRH1    | HRH1    | - |
| hsa-miR-1275 | HS3ST1  | HS3ST1  | - |
| hsa-miR-1275 | HSD11B2 | HSD11B2 | - |
| hsa-miR-1275 | HSDL2   | HSDL2   | - |
| hsa-miR-1275 | HSF1    | HSF1    | - |
| hsa-miR-1275 | HSF2BP  | HSF2BP  | - |
| hsa-miR-1275 | HSPB6   | HSPB6   | - |
| hsa-miR-1275 | HTR3A   | HTR3A   | - |
| hsa-miR-1275 | HTRA2   | HTRA2   | - |
| hsa-miR-1275 | HYOU1   | HYOU1   | - |
| hsa-miR-1275 | ICMT    | ICMT    | - |
| hsa-miR-1275 | IDH3B   | IDH3B   | - |

|              |         |         |   |
|--------------|---------|---------|---|
| hsa-miR-1275 | IFFO2   | IFFO2   | - |
| hsa-miR-1275 | IFIT2   | IFIT2   | - |
| hsa-miR-1275 | IGF1    | IGF1    | - |
| hsa-miR-1275 | IGF1R   | IGF1R   | - |
| hsa-miR-1275 | IGF2BP1 | IGF2BP1 | - |
| hsa-miR-1275 | IGF2BP3 | IGF2BP3 | - |
| hsa-miR-1275 | IGFL3   | IGFL3   | - |
| hsa-miR-1275 | IGFL4   | IGFL4   | - |
| hsa-miR-1275 | IGSF1   | IGSF1   | - |
| hsa-miR-1275 | IGSF11  | IGSF11  | - |
| hsa-miR-1275 | IGSF3   | IGSF3   | - |
| hsa-miR-1275 | IHH     | IHH     | - |
| hsa-miR-1275 | IKZF4   | IKZF4   | - |
| hsa-miR-1275 | IL11RA  | IL11RA  | - |
| hsa-miR-1275 | IL12RB2 | IL12RB2 | - |
| hsa-miR-1275 | IL13RA1 | IL13RA1 | - |
| hsa-miR-1275 | IL17C   | IL17C   | - |
| hsa-miR-1275 | IL1F10  | IL1F10  | - |
| hsa-miR-1275 | ILK     | ILK     | - |
| hsa-miR-1275 | IMMP2L  | IMMP2L  | - |
| hsa-miR-1275 | INA     | INA     | - |
| hsa-miR-1275 | INHBC   | INHBC   | - |
| hsa-miR-1275 | INO80E  | INO80E  | - |
| hsa-miR-1275 | INPP5J  | INPP5J  | - |
| hsa-miR-1275 | INSM1   | INSM1   | - |
| hsa-miR-1275 | IP6K2   | IP6K2   | - |
| hsa-miR-1275 | IP6K3   | IP6K3   | - |
| hsa-miR-1275 | IPPK    | IPPK    | - |
| hsa-miR-1275 | IQSEC3  | IQSEC3  | - |
| hsa-miR-1275 | IRAK1   | IRAK1   | - |
| hsa-miR-1275 | IRX5    | IRX5    | - |
| hsa-miR-1275 | ISL1    | ISL1    | - |
| hsa-miR-1275 | ITFG2   | ITFG2   | - |
| hsa-miR-1275 | ITFG3   | ITFG3   | - |
| hsa-miR-1275 | ITGA11  | ITGA11  | - |
| hsa-miR-1275 | ITGA3   | ITGA3   | - |
| hsa-miR-1275 | ITM2C   | ITM2C   | - |
| hsa-miR-1275 | ITSN1   | ITSN1   | - |
| hsa-miR-1275 | ITSN2   | ITSN2   | - |
| hsa-miR-1275 | JAZF1   | JAZF1   | - |
| hsa-miR-1275 | JMJD5   | JMJD5   | - |
| hsa-miR-1275 | JPH4    | JPH4    | - |
| hsa-miR-1275 | JUB     | JUB     | - |
| hsa-miR-1275 | JUN     | JUN     | - |
| hsa-miR-1275 | JUP     | JUP     | - |
| hsa-miR-1275 | KALRN   | KALRN   | - |
| hsa-miR-1275 | KANK2   | KANK2   | - |
| hsa-miR-1275 | KATNAL2 | KATNAL2 | - |
| hsa-miR-1275 | KCNC3   | KCNC3   | - |
| hsa-miR-1275 | KCNE1   | KCNE1   | - |
| hsa-miR-1275 | KCNG3   | KCNG3   | - |

|              |            |            |   |
|--------------|------------|------------|---|
| hsa-miR-1275 | KCNH2      | KCNH2      | - |
| hsa-miR-1275 | KCNH4      | KCNH4      | - |
| hsa-miR-1275 | KCNH8      | KCNH8      | - |
| hsa-miR-1275 | KCNIP2     | KCNIP2     | - |
| hsa-miR-1275 | KCNJ10     | KCNJ10     | - |
| hsa-miR-1275 | KCNJ4      | KCNJ4      | - |
| hsa-miR-1275 | KCNJ6      | KCNJ6      | - |
| hsa-miR-1275 | KCNK17     | KCNK17     | - |
| hsa-miR-1275 | KCNMA1     | KCNMA1     | - |
| hsa-miR-1275 | KCNMB1     | KCNMB1     | - |
| hsa-miR-1275 | KCNS1      | KCNS1      | - |
| hsa-miR-1275 | KCTD2      | KCTD2      | - |
| hsa-miR-1275 | KCTD20     | KCTD20     | - |
| hsa-miR-1275 | KCTD21     | KCTD21     | - |
| hsa-miR-1275 | KDEL3      | KDEL3      | - |
| hsa-miR-1275 | KDM5C      | KDM5C      | - |
| hsa-miR-1275 | KIAA0141   | KIAA0141   | - |
| hsa-miR-1275 | KIAA0146   | KIAA0146   | - |
| hsa-miR-1275 | KIAA0195   | KIAA0195   | - |
| hsa-miR-1275 | KIAA0528   | KIAA0528   | - |
| hsa-miR-1275 | KIAA0556   | KIAA0556   | - |
| hsa-miR-1275 | KIAA0776   | KIAA0776   | - |
| hsa-miR-1275 | KIAA1033   | KIAA1033   | - |
| hsa-miR-1275 | KIAA1199   | KIAA1199   | - |
| hsa-miR-1275 | KIAA1210   | KIAA1210   | - |
| hsa-miR-1275 | KIAA1274   | KIAA1274   | - |
| hsa-miR-1275 | KIAA1467   | KIAA1467   | - |
| hsa-miR-1275 | KIAA1543   | KIAA1543   | - |
| hsa-miR-1275 | KIF4B      | KIF4B      | - |
| hsa-miR-1275 | KLF13      | KLF13      | - |
| hsa-miR-1275 | KLF14      | KLF14      | - |
| hsa-miR-1275 | KLF6       | KLF6       | - |
| hsa-miR-1275 | KLHL14     | KLHL14     | - |
| hsa-miR-1275 | KLHL18     | KLHL18     | - |
| hsa-miR-1275 | KLHL28     | KLHL28     | - |
| hsa-miR-1275 | KLK10      | KLK10      | - |
| hsa-miR-1275 | KLK15      | KLK15      | - |
| hsa-miR-1275 | KLK2       | KLK2       | - |
| hsa-miR-1275 | KNDC1      | KNDC1      | - |
| hsa-miR-1275 | KPNA1      | KPNA1      | - |
| hsa-miR-1275 | KRI1       | KRI1       | - |
| hsa-miR-1275 | KRT1       | KRT1       | - |
| hsa-miR-1275 | KRT222     | KRT222     | - |
| hsa-miR-1275 | KRT23      | KRT23      | - |
| hsa-miR-1275 | KRT27      | KRT27      | - |
| hsa-miR-1275 | KRT79      | KRT79      | - |
| hsa-miR-1275 | KRT81      | KRT81      | - |
| hsa-miR-1275 | KRT85      | KRT85      | - |
| hsa-miR-1275 | KRTAP10-10 | KRTAP10-10 | - |
| hsa-miR-1275 | KRTAP10-12 | KRTAP10-12 | - |
| hsa-miR-1275 | KRTAP10-7  | KRTAP10-7  | - |

|              |              |              |   |
|--------------|--------------|--------------|---|
| hsa-miR-1275 | L1TD1        | L1TD1        | - |
| hsa-miR-1275 | LALBA        | LALBA        | - |
| hsa-miR-1275 | LAPTM4B      | LAPTM4B      | - |
| hsa-miR-1275 | LARP4B       | LARP4B       | - |
| hsa-miR-1275 | LCE1B        | LCE1B        | - |
| hsa-miR-1275 | LCLAT1       | LCLAT1       | - |
| hsa-miR-1275 | LDHA         | LDHA         | - |
| hsa-miR-1275 | LDHD         | LDHD         | - |
| hsa-miR-1275 | LDLRAD2      | LDLRAD2      | - |
| hsa-miR-1275 | LDLRAD3      | LDLRAD3      | - |
| hsa-miR-1275 | LEFTY2       | LEFTY2       | - |
| hsa-miR-1275 | LEMD1        | LEMD1        | - |
| hsa-miR-1275 | LEPREL1      | LEPREL1      | - |
| hsa-miR-1275 | LETM1        | LETM1        | - |
| hsa-miR-1275 | LGALS8       | LGALS8       | - |
| hsa-miR-1275 | LGALS9       | LGALS9       | - |
| hsa-miR-1275 | LGALS9C      | LGALS9C      | - |
| hsa-miR-1275 | LHFPL2       | LHFPL2       | - |
| hsa-miR-1275 | LHFPL3       | LHFPL3       | - |
| hsa-miR-1275 | LHX6         | LHX6         | - |
| hsa-miR-1275 | LIM2         | LIM2         | - |
| hsa-miR-1275 | LIMA1        | LIMA1        | - |
| hsa-miR-1275 | LIMK1        | LIMK1        | - |
| hsa-miR-1275 | LIMS1        | LIMS1        | - |
| hsa-miR-1275 | LIN37        | LIN37        | - |
| hsa-miR-1275 | LMO4         | LMO4         | - |
| hsa-miR-1275 | LOC100329135 | LOC100329135 | - |
| hsa-miR-1275 | LOC284385    | LOC284385    | - |
| hsa-miR-1275 | LOR          | LOR          | - |
| hsa-miR-1275 | LOXL4        | LOXL4        | - |
| hsa-miR-1275 | LPCAT3       | LPCAT3       | - |
| hsa-miR-1275 | LPIN2        | LPIN2        | - |
| hsa-miR-1275 | LPIN3        | LPIN3        | - |
| hsa-miR-1275 | LPPR5        | LPPR5        | - |
| hsa-miR-1275 | LRCH1        | LRCH1        | - |
| hsa-miR-1275 | LRCH2        | LRCH2        | - |
| hsa-miR-1275 | LRCH4        | LRCH4        | - |
| hsa-miR-1275 | LRP10        | LRP10        | - |
| hsa-miR-1275 | LRP4         | LRP4         | - |
| hsa-miR-1275 | LRP8         | LRP8         | - |
| hsa-miR-1275 | LRRC1        | LRRC1        | - |
| hsa-miR-1275 | LRRC26       | LRRC26       | - |
| hsa-miR-1275 | LRRC28       | LRRC28       | - |
| hsa-miR-1275 | LRRC38       | LRRC38       | - |
| hsa-miR-1275 | LRRC4        | LRRC4        | - |
| hsa-miR-1275 | LRRC48       | LRRC48       | - |
| hsa-miR-1275 | LRRC52       | LRRC52       | - |
| hsa-miR-1275 | LRRC59       | LRRC59       | - |
| hsa-miR-1275 | LRRC8C       | LRRC8C       | - |
| hsa-miR-1275 | LRRC8E       | LRRC8E       | - |
| hsa-miR-1275 | LRRFIP1      | LRRFIP1      | - |



|              |          |          |   |
|--------------|----------|----------|---|
| hsa-miR-1275 | LRRK1    | LRRK1    | - |
| hsa-miR-1275 | LRRN2    | LRRN2    | - |
| hsa-miR-1275 | LRTOMT   | LRTOMT   | - |
| hsa-miR-1275 | LTB4R    | LTB4R    | - |
| hsa-miR-1275 | LTBP2    | LTBP2    | - |
| hsa-miR-1275 | LY6E     | LY6E     | - |
| hsa-miR-1275 | LY6G6C   | LY6G6C   | - |
| hsa-miR-1275 | LYSMD3   | LYSMD3   | - |
| hsa-miR-1275 | M6PR     | M6PR     | - |
| hsa-miR-1275 | MACF1    | MACF1    | - |
| hsa-miR-1275 | MAFF     | MAFF     | - |
| hsa-miR-1275 | MAFG     | MAFG     | - |
| hsa-miR-1275 | MAFIP    | MAFIP    | - |
| hsa-miR-1275 | MAGI1    | MAGI1    | - |
| hsa-miR-1275 | MAGI3    | MAGI3    | - |
| hsa-miR-1275 | MAGT1    | MAGT1    | - |
| hsa-miR-1275 | MAK      | MAK      | - |
| hsa-miR-1275 | MAN1A1   | MAN1A1   | - |
| hsa-miR-1275 | MANBAL   | MANBAL   | - |
| hsa-miR-1275 | MAP1A    | MAP1A    | - |
| hsa-miR-1275 | MAP2K4   | MAP2K4   | - |
| hsa-miR-1275 | MAP3K9   | MAP3K9   | - |
| hsa-miR-1275 | MAP4K1   | MAP4K1   | - |
| hsa-miR-1275 | MAP7D1   | MAP7D1   | - |
| hsa-miR-1275 | MAPK4    | MAPK4    | - |
| hsa-miR-1275 | MAPK8IP3 | MAPK8IP3 | - |
| hsa-miR-1275 | MAPK9    | MAPK9    | - |
| hsa-miR-1275 | MARCH3   | MARCH3   | - |
| hsa-miR-1275 | MARCH9   | MARCH9   | - |
| hsa-miR-1275 | MBD2     | MBD2     | - |
| hsa-miR-1275 | MCC      | MCC      | - |
| hsa-miR-1275 | MCCD1    | MCCD1    | - |
| hsa-miR-1275 | MCFD2    | MCFD2    | - |
| hsa-miR-1275 | MDK      | MDK      | - |
| hsa-miR-1275 | MEAF6    | MEAF6    | - |
| hsa-miR-1275 | MECR     | MECR     | - |
| hsa-miR-1275 | MED17    | MED17    | - |
| hsa-miR-1275 | MED19    | MED19    | - |
| hsa-miR-1275 | MED29    | MED29    | - |
| hsa-miR-1275 | MEF2D    | MEF2D    | - |
| hsa-miR-1275 | MEN1     | MEN1     | - |
| hsa-miR-1275 | MEPCE    | MEPCE    | - |
| hsa-miR-1275 | MESDC1   | MESDC1   | - |
| hsa-miR-1275 | METAP1   | METAP1   | - |
| hsa-miR-1275 | METTL6   | METTL6   | - |
| hsa-miR-1275 | METTL9   | METTL9   | - |
| hsa-miR-1275 | MEX3A    | MEX3A    | - |
| hsa-miR-1275 | MFAP4    | MFAP4    | - |
| hsa-miR-1275 | MFN2     | MFN2     | - |
| hsa-miR-1275 | MGA      | MGA      | - |
| hsa-miR-1275 | MGAT1    | MGAT1    | - |

|              |          |          |   |
|--------------|----------|----------|---|
| hsa-miR-1275 | MGST2    | MGST2    | - |
| hsa-miR-1275 | MID1     | MID1     | - |
| hsa-miR-1275 | MINK1    | MINK1    | - |
| hsa-miR-1275 | MKNK2    | MKNK2    | - |
| hsa-miR-1275 | MLLT10   | MLLT10   | - |
| hsa-miR-1275 | MLLT6    | MLLT6    | - |
| hsa-miR-1275 | MMP13    | MMP13    | - |
| hsa-miR-1275 | MMP24    | MMP24    | - |
| hsa-miR-1275 | MMP8     | MMP8     | - |
| hsa-miR-1275 | MOCS2    | MOCS2    | - |
| hsa-miR-1275 | MOCS3    | MOCS3    | - |
| hsa-miR-1275 | MORC1    | MORC1    | - |
| hsa-miR-1275 | MORN4    | MORN4    | - |
| hsa-miR-1275 | MPL      | MPL      | - |
| hsa-miR-1275 | MPPE1    | MPPE1    | - |
| hsa-miR-1275 | MPZ      | MPZ      | - |
| hsa-miR-1275 | MPZL2    | MPZL2    | - |
| hsa-miR-1275 | MR1      | MR1      | - |
| hsa-miR-1275 | MRC1     | MRC1     | - |
| hsa-miR-1275 | MRPL49   | MRPL49   | - |
| hsa-miR-1275 | MRPS27   | MRPS27   | - |
| hsa-miR-1275 | MRPS34   | MRPS34   | - |
| hsa-miR-1275 | MRRF     | MRRF     | - |
| hsa-miR-1275 | MRVI1    | MRVI1    | - |
| hsa-miR-1275 | MTHFD2L  | MTHFD2L  | - |
| hsa-miR-1275 | MTHFSD   | MTHFSD   | - |
| hsa-miR-1275 | MTMR14   | MTMR14   | - |
| hsa-miR-1275 | MTMR4    | MTMR4    | - |
| hsa-miR-1275 | MTSS1L   | MTSS1L   | - |
| hsa-miR-1275 | MUS81    | MUS81    | - |
| hsa-miR-1275 | MXD1     | MXD1     | - |
| hsa-miR-1275 | MXD3     | MXD3     | - |
| hsa-miR-1275 | MYADM    | MYADM    | - |
| hsa-miR-1275 | MYCBP2   | MYCBP2   | - |
| hsa-miR-1275 | MYCT1    | MYCT1    | - |
| hsa-miR-1275 | MYH10    | MYH10    | - |
| hsa-miR-1275 | MYH14    | MYH14    | - |
| hsa-miR-1275 | MYL12A   | MYL12A   | - |
| hsa-miR-1275 | MYL12B   | MYL12B   | - |
| hsa-miR-1275 | MYLK4    | MYLK4    | - |
| hsa-miR-1275 | MYO15A   | MYO15A   | - |
| hsa-miR-1275 | MYO3B    | MYO3B    | - |
| hsa-miR-1275 | MYO6     | MYO6     | - |
| hsa-miR-1275 | MYO9A    | MYO9A    | - |
| hsa-miR-1275 | MYO9B    | MYO9B    | - |
| hsa-miR-1275 | MYOM3    | MYOM3    | - |
| hsa-miR-1275 | NAA40    | NAA40    | - |
| hsa-miR-1275 | NAALADL2 | NAALADL2 | - |
| hsa-miR-1275 | NAB1     | NAB1     | - |
| hsa-miR-1275 | NAB2     | NAB2     | - |
| hsa-miR-1275 | NAPA     | NAPA     | - |

|              |          |          |   |
|--------------|----------|----------|---|
| hsa-miR-1275 | NAPEPLD  | NAPEPLD  | - |
| hsa-miR-1275 | NAPG     | NAPG     | - |
| hsa-miR-1275 | NARFL    | NARFL    | - |
| hsa-miR-1275 | NAV1     | NAV1     | - |
| hsa-miR-1275 | NBL1     | NBL1     | - |
| hsa-miR-1275 | NBN      | NBN      | - |
| hsa-miR-1275 | NCAN     | NCAN     | - |
| hsa-miR-1275 | NCDN     | NCDN     | - |
| hsa-miR-1275 | NCOA1    | NCOA1    | - |
| hsa-miR-1275 | NCOA7    | NCOA7    | - |
| hsa-miR-1275 | NDEL1    | NDEL1    | - |
| hsa-miR-1275 | NDRG2    | NDRG2    | - |
| hsa-miR-1275 | NDRG3    | NDRG3    | - |
| hsa-miR-1275 | NEBL     | NEBL     | - |
| hsa-miR-1275 | NEUROD2  | NEUROD2  | - |
| hsa-miR-1275 | NEUROG2  | NEUROG2  | - |
| hsa-miR-1275 | NF1      | NF1      | - |
| hsa-miR-1275 | NFIA     | NFIA     | - |
| hsa-miR-1275 | NFIX     | NFIX     | - |
| hsa-miR-1275 | NFX1     | NFX1     | - |
| hsa-miR-1275 | NFYC     | NFYC     | - |
| hsa-miR-1275 | NGB      | NGB      | - |
| hsa-miR-1275 | NIPAL2   | NIPAL2   | - |
| hsa-miR-1275 | NIT1     | NIT1     | - |
| hsa-miR-1275 | NKAIN1   | NKAIN1   | - |
| hsa-miR-1275 | NKAPL    | NKAPL    | - |
| hsa-miR-1275 | NKIRAS2  | NKIRAS2  | - |
| hsa-miR-1275 | NKPD1    | NKPD1    | - |
| hsa-miR-1275 | NLGN2    | NLGN2    | - |
| hsa-miR-1275 | NME4     | NME4     | - |
| hsa-miR-1275 | NMUR1    | NMUR1    | - |
| hsa-miR-1275 | NOC2L    | NOC2L    | - |
| hsa-miR-1275 | NOL10    | NOL10    | - |
| hsa-miR-1275 | NOL12    | NOL12    | - |
| hsa-miR-1275 | NOL4     | NOL4     | - |
| hsa-miR-1275 | NONO     | NONO     | - |
| hsa-miR-1275 | NOS1     | NOS1     | - |
| hsa-miR-1275 | NOS2     | NOS2     | - |
| hsa-miR-1275 | NOTCH2NL | NOTCH2NL | - |
| hsa-miR-1275 | NOTCH4   | NOTCH4   | - |
| hsa-miR-1275 | NPFF     | NPFF     | - |
| hsa-miR-1275 | NR1D1    | NR1D1    | - |
| hsa-miR-1275 | NR3C2    | NR3C2    | - |
| hsa-miR-1275 | NR4A1    | NR4A1    | - |
| hsa-miR-1275 | NRG3     | NRG3     | - |
| hsa-miR-1275 | NRXN2    | NRXN2    | - |
| hsa-miR-1275 | NRXN3    | NRXN3    | - |
| hsa-miR-1275 | NSD1     | NSD1     | - |
| hsa-miR-1275 | NTN5     | NTN5     | - |
| hsa-miR-1275 | NTRK1    | NTRK1    | - |
| hsa-miR-1275 | NTRK3    | NTRK3    | - |

|              |        |        |   |
|--------------|--------|--------|---|
| hsa-miR-1275 | NUAK1  | NUAK1  | - |
| hsa-miR-1275 | NUDT15 | NUDT15 | - |
| hsa-miR-1275 | NUMB   | NUMB   | - |
| hsa-miR-1275 | NUP98  | NUP98  | - |
| hsa-miR-1275 | NUPR1  | NUPR1  | - |
| hsa-miR-1275 | NVL    | NVL    | - |
| hsa-miR-1275 | NXPH2  | NXPH2  | - |
| hsa-miR-1275 | NXPH4  | NXPH4  | - |
| hsa-miR-1275 | NXT2   | NXT2   | - |
| hsa-miR-1275 | OAS2   | OAS2   | - |
| hsa-miR-1275 | OBFC1  | OBFC1  | - |
| hsa-miR-1275 | OBFC2A | OBFC2A | - |
| hsa-miR-1275 | OCM    | OCM    | - |
| hsa-miR-1275 | OCM2   | OCM2   | - |
| hsa-miR-1275 | ODF4   | ODF4   | - |
| hsa-miR-1275 | OLFML1 | OLFML1 | - |
| hsa-miR-1275 | OPN3   | OPN3   | - |
| hsa-miR-1275 | OPN4   | OPN4   | - |
| hsa-miR-1275 | OR51E1 | OR51E1 | - |
| hsa-miR-1275 | ORMDL3 | ORMDL3 | - |
| hsa-miR-1275 | OSBPL3 | OSBPL3 | - |
| hsa-miR-1275 | OSBPL5 | OSBPL5 | - |
| hsa-miR-1275 | OST4   | OST4   | - |
| hsa-miR-1275 | OTOR   | OTOR   | - |
| hsa-miR-1275 | OTUB2  | OTUB2  | - |
| hsa-miR-1275 | OTX1   | OTX1   | - |
| hsa-miR-1275 | OVOL2  | OVOL2  | - |
| hsa-miR-1275 | OXSRI  | OXSRI  | - |
| hsa-miR-1275 | OXT    | OXT    | - |
| hsa-miR-1275 | P2RX7  | P2RX7  | - |
| hsa-miR-1275 | P2RY11 | P2RY11 | - |
| hsa-miR-1275 | P2RY2  | P2RY2  | - |
| hsa-miR-1275 | P2RY4  | P2RY4  | - |
| hsa-miR-1275 | PABPC4 | PABPC4 | - |
| hsa-miR-1275 | PACS1  | PACS1  | - |
| hsa-miR-1275 | PADI3  | PADI3  | - |
| hsa-miR-1275 | PAK2   | PAK2   | - |
| hsa-miR-1275 | PALM2  | PALM2  | - |
| hsa-miR-1275 | PAPD7  | PAPD7  | - |
| hsa-miR-1275 | PARL   | PARL   | - |
| hsa-miR-1275 | PARP15 | PARP15 | - |
| hsa-miR-1275 | PARVA  | PARVA  | - |
| hsa-miR-1275 | PAX2   | PAX2   | - |
| hsa-miR-1275 | PAX5   | PAX5   | - |
| hsa-miR-1275 | PAX6   | PAX6   | - |
| hsa-miR-1275 | PAX7   | PAX7   | - |
| hsa-miR-1275 | PAX9   | PAX9   | - |
| hsa-miR-1275 | PBLD   | PBLD   | - |
| hsa-miR-1275 | PBX2   | PBX2   | - |
| hsa-miR-1275 | PCDH1  | PCDH1  | - |
| hsa-miR-1275 | PCDH19 | PCDH19 | - |

|              |          |          |   |
|--------------|----------|----------|---|
| hsa-miR-1275 | PCDHB11  | PCDHB11  | - |
| hsa-miR-1275 | PCDHB13  | PCDHB13  | - |
| hsa-miR-1275 | PCDHGA1  | PCDHGA1  | - |
| hsa-miR-1275 | PCDHGA10 | PCDHGA10 | - |
| hsa-miR-1275 | PCDHGA11 | PCDHGA11 | - |
| hsa-miR-1275 | PCDHGA12 | PCDHGA12 | - |
| hsa-miR-1275 | PCDHGA2  | PCDHGA2  | - |
| hsa-miR-1275 | PCDHGA3  | PCDHGA3  | - |
| hsa-miR-1275 | PCDHGA4  | PCDHGA4  | - |
| hsa-miR-1275 | PCDHGA5  | PCDHGA5  | - |
| hsa-miR-1275 | PCDHGA6  | PCDHGA6  | - |
| hsa-miR-1275 | PCDHGA7  | PCDHGA7  | - |
| hsa-miR-1275 | PCDHGA8  | PCDHGA8  | - |
| hsa-miR-1275 | PCDHGA9  | PCDHGA9  | - |
| hsa-miR-1275 | PCDHGB1  | PCDHGB1  | - |
| hsa-miR-1275 | PCDHGB2  | PCDHGB2  | - |
| hsa-miR-1275 | PCDHGB3  | PCDHGB3  | - |
| hsa-miR-1275 | PCDHGB4  | PCDHGB4  | - |
| hsa-miR-1275 | PCDHGB5  | PCDHGB5  | - |
| hsa-miR-1275 | PCDHGB6  | PCDHGB6  | - |
| hsa-miR-1275 | PCDHGB7  | PCDHGB7  | - |
| hsa-miR-1275 | PCDHGC3  | PCDHGC3  | - |
| hsa-miR-1275 | PCDHGC4  | PCDHGC4  | - |
| hsa-miR-1275 | PCDHGC5  | PCDHGC5  | - |
| hsa-miR-1275 | PCGF3    | PCGF3    | - |
| hsa-miR-1275 | PCIF1    | PCIF1    | - |
| hsa-miR-1275 | PCNXL2   | PCNXL2   | - |
| hsa-miR-1275 | PCSK2    | PCSK2    | - |
| hsa-miR-1275 | PCSK6    | PCSK6    | - |
| hsa-miR-1275 | PCSK7    | PCSK7    | - |
| hsa-miR-1275 | PDE1B    | PDE1B    | - |
| hsa-miR-1275 | PDE4A    | PDE4A    | - |
| hsa-miR-1275 | PDGFB    | PDGFB    | - |
| hsa-miR-1275 | PDGFRB   | PDGFRB   | - |
| hsa-miR-1275 | PDK1     | PDK1     | - |
| hsa-miR-1275 | PDK2     | PDK2     | - |
| hsa-miR-1275 | PDSS2    | PDSS2    | - |
| hsa-miR-1275 | PDXK     | PDXK     | - |
| hsa-miR-1275 | PEA15    | PEA15    | - |
| hsa-miR-1275 | PEAR1    | PEAR1    | - |
| hsa-miR-1275 | PECR     | PECR     | - |
| hsa-miR-1275 | PELI2    | PELI2    | - |
| hsa-miR-1275 | PEX11B   | PEX11B   | - |
| hsa-miR-1275 | PEX5     | PEX5     | - |
| hsa-miR-1275 | PGAM2    | PGAM2    | - |
| hsa-miR-1275 | PGRMC2   | PGRMC2   | - |
| hsa-miR-1275 | PHB2     | PHB2     | - |
| hsa-miR-1275 | PHC2     | PHC2     | - |
| hsa-miR-1275 | PHF16    | PHF16    | - |
| hsa-miR-1275 | PHKA2    | PHKA2    | - |
| hsa-miR-1275 | PHLDA3   | PHLDA3   | - |

|              |         |         |   |
|--------------|---------|---------|---|
| hsa-miR-1275 | PHLPP1  | PHLPP1  | - |
| hsa-miR-1275 | PHYH    | PHYH    | - |
| hsa-miR-1275 | PIAS3   | PIAS3   | - |
| hsa-miR-1275 | PICK1   | PICK1   | - |
| hsa-miR-1275 | PIGK    | PIGK    | - |
| hsa-miR-1275 | PIK3AP1 | PIK3AP1 | - |
| hsa-miR-1275 | PIK3R2  | PIK3R2  | - |
| hsa-miR-1275 | PIP4K2B | PIP4K2B | - |
| hsa-miR-1275 | PIPOX   | PIPOX   | - |
| hsa-miR-1275 | PITPNA  | PITPNA  | - |
| hsa-miR-1275 | PITPNM3 | PITPNM3 | - |
| hsa-miR-1275 | PKDREJ  | PKDREJ  | - |
| hsa-miR-1275 | PKHD1   | PKHD1   | - |
| hsa-miR-1275 | PKM2    | PKM2    | - |
| hsa-miR-1275 | PKN3    | PKN3    | - |
| hsa-miR-1275 | PKNOX1  | PKNOX1  | - |
| hsa-miR-1275 | PKNOX2  | PKNOX2  | - |
| hsa-miR-1275 | PKP2    | PKP2    | - |
| hsa-miR-1275 | PLA2G2D | PLA2G2D | - |
| hsa-miR-1275 | PLA2G6  | PLA2G6  | - |
| hsa-miR-1275 | PLBD2   | PLBD2   | - |
| hsa-miR-1275 | PLCB2   | PLCB2   | - |
| hsa-miR-1275 | PLCB3   | PLCB3   | - |
| hsa-miR-1275 | PLCD4   | PLCD4   | - |
| hsa-miR-1275 | PLCXD3  | PLCXD3  | - |
| hsa-miR-1275 | PLD3    | PLD3    | - |
| hsa-miR-1275 | PLD6    | PLD6    | - |
| hsa-miR-1275 | PLDN    | PLDN    | - |
| hsa-miR-1275 | PLEKHA7 | PLEKHA7 | - |
| hsa-miR-1275 | PLEKHA8 | PLEKHA8 | - |
| hsa-miR-1275 | PLEKHG2 | PLEKHG2 | - |
| hsa-miR-1275 | PLEKHH1 | PLEKHH1 | - |
| hsa-miR-1275 | PLGLB1  | PLGLB1  | - |
| hsa-miR-1275 | PLGLB2  | PLGLB2  | - |
| hsa-miR-1275 | PLK3    | PLK3    | - |
| hsa-miR-1275 | PLOD1   | PLOD1   | - |
| hsa-miR-1275 | PLP1    | PLP1    | - |
| hsa-miR-1275 | PLUNC   | PLUNC   | - |
| hsa-miR-1275 | PLVAP   | PLVAP   | - |
| hsa-miR-1275 | PLXNA1  | PLXNA1  | - |
| hsa-miR-1275 | PLXNA4  | PLXNA4  | - |
| hsa-miR-1275 | PNCK    | PNCK    | - |
| hsa-miR-1275 | PNKD    | PNKD    | - |
| hsa-miR-1275 | PNMA1   | PNMA1   | - |
| hsa-miR-1275 | PNMAL1  | PNMAL1  | - |
| hsa-miR-1275 | PNMAL2  | PNMAL2  | - |
| hsa-miR-1275 | PNOC    | PNOC    | - |
| hsa-miR-1275 | PNPLA6  | PNPLA6  | - |
| hsa-miR-1275 | PNPO    | PNPO    | - |
| hsa-miR-1275 | POGK    | POGK    | - |
| hsa-miR-1275 | POGZ    | POGZ    | - |

|              |             |             |   |
|--------------|-------------|-------------|---|
| hsa-miR-1275 | POLDIP2     | POLDIP2     | - |
| hsa-miR-1275 | POLE3       | POLE3       | - |
| hsa-miR-1275 | POLM        | POLM        | - |
| hsa-miR-1275 | POLR1D      | POLR1D      | - |
| hsa-miR-1275 | POLR2F      | POLR2F      | - |
| hsa-miR-1275 | POLR2J2     | POLR2J2     | - |
| hsa-miR-1275 | POLR2J3     | POLR2J3     | - |
| hsa-miR-1275 | POMT2       | POMT2       | - |
| hsa-miR-1275 | POP4        | POP4        | - |
| hsa-miR-1275 | POT1        | POT1        | - |
| hsa-miR-1275 | POU3F2      | POU3F2      | - |
| hsa-miR-1275 | POU4F1      | POU4F1      | - |
| hsa-miR-1275 | PPAN-P2RY11 | PPAN-P2RY11 | - |
| hsa-miR-1275 | PPHLN1      | PPHLN1      | - |
| hsa-miR-1275 | PPIL1       | PPIL1       | - |
| hsa-miR-1275 | PPIL2       | PPIL2       | - |
| hsa-miR-1275 | PPM1E       | PPM1E       | - |
| hsa-miR-1275 | PPP1CA      | PPP1CA      | - |
| hsa-miR-1275 | PPP1R13L    | PPP1R13L    | - |
| hsa-miR-1275 | PPP1R1B     | PPP1R1B     | - |
| hsa-miR-1275 | PPP1R3C     | PPP1R3C     | - |
| hsa-miR-1275 | PPP2R1A     | PPP2R1A     | - |
| hsa-miR-1275 | PPP4C       | PPP4C       | - |
| hsa-miR-1275 | PPP5C       | PPP5C       | - |
| hsa-miR-1275 | PPP6C       | PPP6C       | - |
| hsa-miR-1275 | PPPDE1      | PPPDE1      | - |
| hsa-miR-1275 | PPT2        | PPT2        | - |
| hsa-miR-1275 | PRC1        | PRC1        | - |
| hsa-miR-1275 | PRDM1       | PRDM1       | - |
| hsa-miR-1275 | PRDM2       | PRDM2       | - |
| hsa-miR-1275 | PRDX2       | PRDX2       | - |
| hsa-miR-1275 | PRIM2       | PRIM2       | - |
| hsa-miR-1275 | PRIMA1      | PRIMA1      | - |
| hsa-miR-1275 | PRKACA      | PRKACA      | - |
| hsa-miR-1275 | PRKAG3      | PRKAG3      | - |
| hsa-miR-1275 | PRKAR1B     | PRKAR1B     | - |
| hsa-miR-1275 | PRKCSH      | PRKCSH      | - |
| hsa-miR-1275 | PRLR        | PRLR        | - |
| hsa-miR-1275 | PROK1       | PROK1       | - |
| hsa-miR-1275 | PROSC       | PROSC       | - |
| hsa-miR-1275 | PRPF38A     | PRPF38A     | - |
| hsa-miR-1275 | PRPF38B     | PRPF38B     | - |
| hsa-miR-1275 | PRPH2       | PRPH2       | - |
| hsa-miR-1275 | PRR12       | PRR12       | - |
| hsa-miR-1275 | PRR23A      | PRR23A      | - |
| hsa-miR-1275 | PRR5L       | PRR5L       | - |
| hsa-miR-1275 | PRRX1       | PRRX1       | - |
| hsa-miR-1275 | PSAP        | PSAP        | - |
| hsa-miR-1275 | PSCA        | PSCA        | - |
| hsa-miR-1275 | PSEENEN     | PSEENEN     | - |
| hsa-miR-1275 | PSMB8       | PSMB8       | - |

|              |           |           |   |
|--------------|-----------|-----------|---|
| hsa-miR-1275 | PSMC3IP   | PSMC3IP   | - |
| hsa-miR-1275 | PTGER3    | PTGER3    | - |
| hsa-miR-1275 | PTGIS     | PTGIS     | - |
| hsa-miR-1275 | PTHLH     | PTHLH     | - |
| hsa-miR-1275 | PTMS      | PTMS      | - |
| hsa-miR-1275 | PTPDC1    | PTPDC1    | - |
| hsa-miR-1275 | PTPLAD2   | PTPLAD2   | - |
| hsa-miR-1275 | PTPN18    | PTPN18    | - |
| hsa-miR-1275 | PTPN7     | PTPN7     | - |
| hsa-miR-1275 | PTPRA     | PTPRA     | - |
| hsa-miR-1275 | PTPRO     | PTPRO     | - |
| hsa-miR-1275 | PTPRR     | PTPRR     | - |
| hsa-miR-1275 | PURG      | PURG      | - |
| hsa-miR-1275 | PVALB     | PVALB     | - |
| hsa-miR-1275 | PVR       | PVR       | - |
| hsa-miR-1275 | PVRL2     | PVRL2     | - |
| hsa-miR-1275 | ProSAPiP1 | ProSAPiP1 | - |
| hsa-miR-1275 | QKI       | QKI       | - |
| hsa-miR-1275 | RAB11FIP2 | RAB11FIP2 | - |
| hsa-miR-1275 | RAB11FIP5 | RAB11FIP5 | - |
| hsa-miR-1275 | RAB12     | RAB12     | - |
| hsa-miR-1275 | RAB15     | RAB15     | - |
| hsa-miR-1275 | RAB18     | RAB18     | - |
| hsa-miR-1275 | RAB33B    | RAB33B    | - |
| hsa-miR-1275 | RAB3A     | RAB3A     | - |
| hsa-miR-1275 | RAB3D     | RAB3D     | - |
| hsa-miR-1275 | RABGAP1   | RABGAP1   | - |
| hsa-miR-1275 | RABGGTB   | RABGGTB   | - |
| hsa-miR-1275 | RABIF     | RABIF     | - |
| hsa-miR-1275 | RAD1      | RAD1      | - |
| hsa-miR-1275 | RAD18     | RAD18     | - |
| hsa-miR-1275 | RAD9B     | RAD9B     | - |
| hsa-miR-1275 | RALY      | RALY      | - |
| hsa-miR-1275 | RANBP10   | RANBP10   | - |
| hsa-miR-1275 | RANGRF    | RANGRF    | - |
| hsa-miR-1275 | RAPGEF6   | RAPGEF6   | - |
| hsa-miR-1275 | RAPGEFL1  | RAPGEFL1  | - |
| hsa-miR-1275 | RARA      | RARA      | - |
| hsa-miR-1275 | RARG      | RARG      | - |
| hsa-miR-1275 | RASA4     | RASA4     | - |
| hsa-miR-1275 | RASGRP4   | RASGRP4   | - |
| hsa-miR-1275 | RBM23     | RBM23     | - |
| hsa-miR-1275 | RBMX      | RBMX      | - |
| hsa-miR-1275 | RCBTB1    | RCBTB1    | - |
| hsa-miR-1275 | RECK      | RECK      | - |
| hsa-miR-1275 | RECQL5    | RECQL5    | - |
| hsa-miR-1275 | REEP6     | REEP6     | - |
| hsa-miR-1275 | REG3A     | REG3A     | - |
| hsa-miR-1275 | RELT      | RELT      | - |
| hsa-miR-1275 | REM1      | REM1      | - |
| hsa-miR-1275 | RERE      | RERE      | - |



|              |         |         |   |
|--------------|---------|---------|---|
| hsa-miR-1275 | RERG    | RERG    | - |
| hsa-miR-1275 | RFX4    | RFX4    | - |
| hsa-miR-1275 | RGS11   | RGS11   | - |
| hsa-miR-1275 | RGS14   | RGS14   | - |
| hsa-miR-1275 | RGS19   | RGS19   | - |
| hsa-miR-1275 | RHBDL3  | RHBDL3  | - |
| hsa-miR-1275 | RHOF    | RHOF    | - |
| hsa-miR-1275 | RHPN1   | RHPN1   | - |
| hsa-miR-1275 | RIC8A   | RIC8A   | - |
| hsa-miR-1275 | RIMBP2  | RIMBP2  | - |
| hsa-miR-1275 | RIMKLB  | RIMKLB  | - |
| hsa-miR-1275 | RIN3    | RIN3    | - |
| hsa-miR-1275 | RING1   | RING1   | - |
| hsa-miR-1275 | RIPK3   | RIPK3   | - |
| hsa-miR-1275 | RNASE13 | RNASE13 | - |
| hsa-miR-1275 | RNF10   | RNF10   | - |
| hsa-miR-1275 | RNF111  | RNF111  | - |
| hsa-miR-1275 | RNF125  | RNF125  | - |
| hsa-miR-1275 | RNF141  | RNF141  | - |
| hsa-miR-1275 | RNF157  | RNF157  | - |
| hsa-miR-1275 | RNF165  | RNF165  | - |
| hsa-miR-1275 | RNF212  | RNF212  | - |
| hsa-miR-1275 | RNLS    | RNLS    | - |
| hsa-miR-1275 | ROBO4   | ROBO4   | - |
| hsa-miR-1275 | RPAIN   | RPAIN   | - |
| hsa-miR-1275 | RPAP3   | RPAP3   | - |
| hsa-miR-1275 | RPGR    | RPGR    | - |
| hsa-miR-1275 | RPL34   | RPL34   | - |
| hsa-miR-1275 | RPP25   | RPP25   | - |
| hsa-miR-1275 | RPP30   | RPP30   | - |
| hsa-miR-1275 | RPRD2   | RPRD2   | - |
| hsa-miR-1275 | RPS24   | RPS24   | - |
| hsa-miR-1275 | RPS6KA4 | RPS6KA4 | - |
| hsa-miR-1275 | RPUSD1  | RPUSD1  | - |
| hsa-miR-1275 | RRAS    | RRAS    | - |
| hsa-miR-1275 | RSPO2   | RSPO2   | - |
| hsa-miR-1275 | RSU1    | RSU1    | - |
| hsa-miR-1275 | RTN4RL1 | RTN4RL1 | - |
| hsa-miR-1275 | RUNDC3A | RUNDC3A | - |
| hsa-miR-1275 | RUNX1   | RUNX1   | - |
| hsa-miR-1275 | RUNX3   | RUNX3   | - |
| hsa-miR-1275 | RXRB    | RXRB    | - |
| hsa-miR-1275 | S100A10 | S100A10 | - |
| hsa-miR-1275 | S100A7A | S100A7A | - |
| hsa-miR-1275 | S100G   | S100G   | - |
| hsa-miR-1275 | S1PR2   | S1PR2   | - |
| hsa-miR-1275 | SAMD4A  | SAMD4A  | - |
| hsa-miR-1275 | SAMD4B  | SAMD4B  | - |
| hsa-miR-1275 | SAP30BP | SAP30BP | - |
| hsa-miR-1275 | SAR1A   | SAR1A   | - |
| hsa-miR-1275 | SASH3   | SASH3   | - |

|              |          |          |   |
|--------------|----------|----------|---|
| hsa-miR-1275 | SASS6    | SASS6    | - |
| hsa-miR-1275 | SBF1     | SBF1     | - |
| hsa-miR-1275 | SC5DL    | SC5DL    | - |
| hsa-miR-1275 | SCML2    | SCML2    | - |
| hsa-miR-1275 | SCRIB    | SCRIB    | - |
| hsa-miR-1275 | SCRT2    | SCRT2    | - |
| hsa-miR-1275 | SCUBE3   | SCUBE3   | - |
| hsa-miR-1275 | SDC3     | SDC3     | - |
| hsa-miR-1275 | SDHAF1   | SDHAF1   | - |
| hsa-miR-1275 | SEC22C   | SEC22C   | - |
| hsa-miR-1275 | SEC24A   | SEC24A   | - |
| hsa-miR-1275 | SEC31B   | SEC31B   | - |
| hsa-miR-1275 | SELPLG   | SELPLG   | - |
| hsa-miR-1275 | SEMA3D   | SEMA3D   | - |
| hsa-miR-1275 | SEMA4G   | SEMA4G   | - |
| hsa-miR-1275 | SEMA6A   | SEMA6A   | - |
| hsa-miR-1275 | SENP5    | SENP5    | - |
| hsa-miR-1275 | SENP6    | SENP6    | - |
| hsa-miR-1275 | SEPT3    | SEPT3    | - |
| hsa-miR-1275 | SEPT6    | SEPT6    | - |
| hsa-miR-1275 | SEPT8    | SEPT8    | - |
| hsa-miR-1275 | SEPT9    | SEPT9    | - |
| hsa-miR-1275 | SERBP1   | SERBP1   | - |
| hsa-miR-1275 | SERF2    | SERF2    | - |
| hsa-miR-1275 | SERP2    | SERP2    | - |
| hsa-miR-1275 | SERPINA6 | SERPINA6 | - |
| hsa-miR-1275 | SERPINB7 | SERPINB7 | - |
| hsa-miR-1275 | SERPINE2 | SERPINE2 | - |
| hsa-miR-1275 | SERTAD2  | SERTAD2  | - |
| hsa-miR-1275 | SETBP1   | SETBP1   | - |
| hsa-miR-1275 | SETD1B   | SETD1B   | - |
| hsa-miR-1275 | SETD5    | SETD5    | - |
| hsa-miR-1275 | SF1      | SF1      | - |
| hsa-miR-1275 | SF3A3    | SF3A3    | - |
| hsa-miR-1275 | SFRP1    | SFRP1    | - |
| hsa-miR-1275 | SFTA3    | SFTA3    | - |
| hsa-miR-1275 | SGSM1    | SGSM1    | - |
| hsa-miR-1275 | SH2B1    | SH2B1    | - |
| hsa-miR-1275 | SH2D3C   | SH2D3C   | - |
| hsa-miR-1275 | SH2D4A   | SH2D4A   | - |
| hsa-miR-1275 | SH3BGRL3 | SH3BGRL3 | - |
| hsa-miR-1275 | SH3RF3   | SH3RF3   | - |
| hsa-miR-1275 | SHISA3   | SHISA3   | - |
| hsa-miR-1275 | SHISA7   | SHISA7   | - |
| hsa-miR-1275 | SHOX     | SHOX     | - |
| hsa-miR-1275 | SIAH1    | SIAH1    | - |
| hsa-miR-1275 | SIAH2    | SIAH2    | - |
| hsa-miR-1275 | SIAH3    | SIAH3    | - |
| hsa-miR-1275 | SIDT1    | SIDT1    | - |
| hsa-miR-1275 | SIGLEC1  | SIGLEC1  | - |
| hsa-miR-1275 | SIGLEC8  | SIGLEC8  | - |

|              |          |          |   |
|--------------|----------|----------|---|
| hsa-miR-1275 | SIK2     | SIK2     | - |
| hsa-miR-1275 | SIK3     | SIK3     | - |
| hsa-miR-1275 | SIN3A    | SIN3A    | - |
| hsa-miR-1275 | SIRT2    | SIRT2    | - |
| hsa-miR-1275 | SIX3     | SIX3     | - |
| hsa-miR-1275 | SKAP2    | SKAP2    | - |
| hsa-miR-1275 | SLA2     | SLA2     | - |
| hsa-miR-1275 | SLAMF8   | SLAMF8   | - |
| hsa-miR-1275 | SLC10A2  | SLC10A2  | - |
| hsa-miR-1275 | SLC10A7  | SLC10A7  | - |
| hsa-miR-1275 | SLC11A1  | SLC11A1  | - |
| hsa-miR-1275 | SLC12A6  | SLC12A6  | - |
| hsa-miR-1275 | SLC13A3  | SLC13A3  | - |
| hsa-miR-1275 | SLC13A5  | SLC13A5  | - |
| hsa-miR-1275 | SLC16A11 | SLC16A11 | - |
| hsa-miR-1275 | SLC16A12 | SLC16A12 | - |
| hsa-miR-1275 | SLC17A7  | SLC17A7  | - |
| hsa-miR-1275 | SLC22A1  | SLC22A1  | - |
| hsa-miR-1275 | SLC22A8  | SLC22A8  | - |
| hsa-miR-1275 | SLC25A15 | SLC25A15 | - |
| hsa-miR-1275 | SLC25A17 | SLC25A17 | - |
| hsa-miR-1275 | SLC25A23 | SLC25A23 | - |
| hsa-miR-1275 | SLC25A28 | SLC25A28 | - |
| hsa-miR-1275 | SLC25A29 | SLC25A29 | - |
| hsa-miR-1275 | SLC25A36 | SLC25A36 | - |
| hsa-miR-1275 | SLC25A39 | SLC25A39 | - |
| hsa-miR-1275 | SLC25A43 | SLC25A43 | - |
| hsa-miR-1275 | SLC25A45 | SLC25A45 | - |
| hsa-miR-1275 | SLC26A2  | SLC26A2  | - |
| hsa-miR-1275 | SLC26A9  | SLC26A9  | - |
| hsa-miR-1275 | SLC28A1  | SLC28A1  | - |
| hsa-miR-1275 | SLC29A2  | SLC29A2  | - |
| hsa-miR-1275 | SLC2A3   | SLC2A3   | - |
| hsa-miR-1275 | SLC2A4   | SLC2A4   | - |
| hsa-miR-1275 | SLC2A4RG | SLC2A4RG | - |
| hsa-miR-1275 | SLC30A7  | SLC30A7  | - |
| hsa-miR-1275 | SLC30A8  | SLC30A8  | - |
| hsa-miR-1275 | SLC35A4  | SLC35A4  | - |
| hsa-miR-1275 | SLC35B4  | SLC35B4  | - |
| hsa-miR-1275 | SLC35C1  | SLC35C1  | - |
| hsa-miR-1275 | SLC36A1  | SLC36A1  | - |
| hsa-miR-1275 | SLC38A3  | SLC38A3  | - |
| hsa-miR-1275 | SLC39A14 | SLC39A14 | - |
| hsa-miR-1275 | SLC39A3  | SLC39A3  | - |
| hsa-miR-1275 | SLC39A4  | SLC39A4  | - |
| hsa-miR-1275 | SLC4A2   | SLC4A2   | - |
| hsa-miR-1275 | SLC4A8   | SLC4A8   | - |
| hsa-miR-1275 | SLC6A17  | SLC6A17  | - |
| hsa-miR-1275 | SLC6A7   | SLC6A7   | - |
| hsa-miR-1275 | SLC7A6   | SLC7A6   | - |
| hsa-miR-1275 | SLC7A8   | SLC7A8   | - |

|              |          |          |   |
|--------------|----------|----------|---|
| hsa-miR-1275 | SLC8A1   | SLC8A1   | - |
| hsa-miR-1275 | SLC8A2   | SLC8A2   | - |
| hsa-miR-1275 | SLC9A1   | SLC9A1   | - |
| hsa-miR-1275 | SLC9A3R1 | SLC9A3R1 | - |
| hsa-miR-1275 | SLC9A8   | SLC9A8   | - |
| hsa-miR-1275 | SLFN11   | SLFN11   | - |
| hsa-miR-1275 | SMAD3    | SMAD3    | - |
| hsa-miR-1275 | SMARCA1  | SMARCA1  | - |
| hsa-miR-1275 | SMARCC2  | SMARCC2  | - |
| hsa-miR-1275 | SMEK1    | SMEK1    | - |
| hsa-miR-1275 | SMURF1   | SMURF1   | - |
| hsa-miR-1275 | SMYD1    | SMYD1    | - |
| hsa-miR-1275 | SMYD5    | SMYD5    | - |
| hsa-miR-1275 | SNPH     | SNPH     | - |
| hsa-miR-1275 | SNRNP48  | SNRNP48  | - |
| hsa-miR-1275 | SNRNP70  | SNRNP70  | - |
| hsa-miR-1275 | SNRPE    | SNRPE    | - |
| hsa-miR-1275 | SNTB1    | SNTB1    | - |
| hsa-miR-1275 | SNX17    | SNX17    | - |
| hsa-miR-1275 | SOLH     | SOLH     | - |
| hsa-miR-1275 | SORBS1   | SORBS1   | - |
| hsa-miR-1275 | SORBS3   | SORBS3   | - |
| hsa-miR-1275 | SORD     | SORD     | - |
| hsa-miR-1275 | SOX10    | SOX10    | - |
| hsa-miR-1275 | SOX7     | SOX7     | - |
| hsa-miR-1275 | SPA17    | SPA17    | - |
| hsa-miR-1275 | SPACA4   | SPACA4   | - |
| hsa-miR-1275 | SPAG9    | SPAG9    | - |
| hsa-miR-1275 | SPARC    | SPARC    | - |
| hsa-miR-1275 | SPATA12  | SPATA12  | - |
| hsa-miR-1275 | SPC25    | SPC25    | - |
| hsa-miR-1275 | SPCS2    | SPCS2    | - |
| hsa-miR-1275 | SPEF1    | SPEF1    | - |
| hsa-miR-1275 | SPEN     | SPEN     | - |
| hsa-miR-1275 | SPIB     | SPIB     | - |
| hsa-miR-1275 | SPIN1    | SPIN1    | - |
| hsa-miR-1275 | SPIN3    | SPIN3    | - |
| hsa-miR-1275 | SPINT1   | SPINT1   | - |
| hsa-miR-1275 | SPOCK1   | SPOCK1   | - |
| hsa-miR-1275 | SPOP     | SPOP     | - |
| hsa-miR-1275 | SPRR1B   | SPRR1B   | - |
| hsa-miR-1275 | SPTAN1   | SPTAN1   | - |
| hsa-miR-1275 | SPTB     | SPTB     | - |
| hsa-miR-1275 | SRC      | SRC      | - |
| hsa-miR-1275 | SRCIN1   | SRCIN1   | - |
| hsa-miR-1275 | SRCRB4D  | SRCRB4D  | - |
| hsa-miR-1275 | SRF      | SRF      | - |
| hsa-miR-1275 | SRGAP1   | SRGAP1   | - |
| hsa-miR-1275 | SRL      | SRL      | - |
| hsa-miR-1275 | SRP14    | SRP14    | - |
| hsa-miR-1275 | SRRM2    | SRRM2    | - |

|              |         |         |   |
|--------------|---------|---------|---|
| hsa-miR-1275 | SRRM3   | SRRM3   | - |
| hsa-miR-1275 | SSC5D   | SSC5D   | - |
| hsa-miR-1275 | SSPO    | SSPO    | - |
| hsa-miR-1275 | SSX2IP  | SSX2IP  | - |
| hsa-miR-1275 | ST13    | ST13    | - |
| hsa-miR-1275 | ST18    | ST18    | - |
| hsa-miR-1275 | ST7     | ST7     | - |
| hsa-miR-1275 | ST7L    | ST7L    | - |
| hsa-miR-1275 | STAC2   | STAC2   | - |
| hsa-miR-1275 | STAG3   | STAG3   | - |
| hsa-miR-1275 | STAG3L1 | STAG3L1 | - |
| hsa-miR-1275 | STAM2   | STAM2   | - |
| hsa-miR-1275 | STAT2   | STAT2   | - |
| hsa-miR-1275 | STAT6   | STAT6   | - |
| hsa-miR-1275 | STC1    | STC1    | - |
| hsa-miR-1275 | STEAP2  | STEAP2  | - |
| hsa-miR-1275 | STIM1   | STIM1   | - |
| hsa-miR-1275 | STIM2   | STIM2   | - |
| hsa-miR-1275 | STK11   | STK11   | - |
| hsa-miR-1275 | STK16   | STK16   | - |
| hsa-miR-1275 | STK17B  | STK17B  | - |
| hsa-miR-1275 | STK38   | STK38   | - |
| hsa-miR-1275 | STK38L  | STK38L  | - |
| hsa-miR-1275 | STK4    | STK4    | - |
| hsa-miR-1275 | STMN3   | STMN3   | - |
| hsa-miR-1275 | STOML3  | STOML3  | - |
| hsa-miR-1275 | STON1   | STON1   | - |
| hsa-miR-1275 | STRA6   | STRA6   | - |
| hsa-miR-1275 | STRADA  | STRADA  | - |
| hsa-miR-1275 | STRN4   | STRN4   | - |
| hsa-miR-1275 | STS     | STS     | - |
| hsa-miR-1275 | STUB1   | STUB1   | - |
| hsa-miR-1275 | STX17   | STX17   | - |
| hsa-miR-1275 | STX5    | STX5    | - |
| hsa-miR-1275 | STX8    | STX8    | - |
| hsa-miR-1275 | SUFU    | SUFU    | - |
| hsa-miR-1275 | SULF2   | SULF2   | - |
| hsa-miR-1275 | SUSD4   | SUSD4   | - |
| hsa-miR-1275 | SYN1    | SYN1    | - |
| hsa-miR-1275 | SYN2    | SYN2    | - |
| hsa-miR-1275 | SYNGR1  | SYNGR1  | - |
| hsa-miR-1275 | SYNGR3  | SYNGR3  | - |
| hsa-miR-1275 | SYNPO2  | SYNPO2  | - |
| hsa-miR-1275 | SYNPO2L | SYNPO2L | - |
| hsa-miR-1275 | SYNPR   | SYNPR   | - |
| hsa-miR-1275 | SYPL2   | SYPL2   | - |
| hsa-miR-1275 | SYT4    | SYT4    | - |
| hsa-miR-1275 | SYT7    | SYT7    | - |
| hsa-miR-1275 | SYT9    | SYT9    | - |
| hsa-miR-1275 | SYVN1   | SYVN1   | - |
| hsa-miR-1275 | TAB1    | TAB1    | - |

|              |          |          |   |
|--------------|----------|----------|---|
| hsa-miR-1275 | TACC1    | TACC1    | - |
| hsa-miR-1275 | TACR1    | TACR1    | - |
| hsa-miR-1275 | TADA3    | TADA3    | - |
| hsa-miR-1275 | TAF9B    | TAF9B    | - |
| hsa-miR-1275 | TAGLN2   | TAGLN2   | - |
| hsa-miR-1275 | TBC1D10B | TBC1D10B | - |
| hsa-miR-1275 | TBC1D10C | TBC1D10C | - |
| hsa-miR-1275 | TBC1D15  | TBC1D15  | - |
| hsa-miR-1275 | TBC1D7   | TBC1D7   | - |
| hsa-miR-1275 | TBP      | TBP      | - |
| hsa-miR-1275 | TBX5     | TBX5     | - |
| hsa-miR-1275 | TBX6     | TBX6     | - |
| hsa-miR-1275 | TBXA2R   | TBXA2R   | - |
| hsa-miR-1275 | TCEB2    | TCEB2    | - |
| hsa-miR-1275 | TCEB3    | TCEB3    | - |
| hsa-miR-1275 | TCF12    | TCF12    | - |
| hsa-miR-1275 | TCF7     | TCF7     | - |
| hsa-miR-1275 | TCL1A    | TCL1A    | - |
| hsa-miR-1275 | TCOF1    | TCOF1    | - |
| hsa-miR-1275 | TCP11L1  | TCP11L1  | - |
| hsa-miR-1275 | TDRKH    | TDRKH    | - |
| hsa-miR-1275 | TEKT4    | TEKT4    | - |
| hsa-miR-1275 | TERF2IP  | TERF2IP  | - |
| hsa-miR-1275 | TFAP2B   | TFAP2B   | - |
| hsa-miR-1275 | TFE3     | TFE3     | - |
| hsa-miR-1275 | TFR2     | TFR2     | - |
| hsa-miR-1275 | TFRC     | TFRC     | - |
| hsa-miR-1275 | TGFB3    | TGFB3    | - |
| hsa-miR-1275 | TGFBR3   | TGFBR3   | - |
| hsa-miR-1275 | TGIF2    | TGIF2    | - |
| hsa-miR-1275 | THEM4    | THEM4    | - |
| hsa-miR-1275 | THOC5    | THOC5    | - |
| hsa-miR-1275 | THRA     | THRA     | - |
| hsa-miR-1275 | THUMPD2  | THUMPD2  | - |
| hsa-miR-1275 | TIE1     | TIE1     | - |
| hsa-miR-1275 | TIGD6    | TIGD6    | - |
| hsa-miR-1275 | TIMM23   | TIMM23   | - |
| hsa-miR-1275 | TIMM8B   | TIMM8B   | - |
| hsa-miR-1275 | TKT      | TKT      | - |
| hsa-miR-1275 | TLN1     | TLN1     | - |
| hsa-miR-1275 | TM2D2    | TM2D2    | - |
| hsa-miR-1275 | TM9SF2   | TM9SF2   | - |
| hsa-miR-1275 | TMBIM1   | TMBIM1   | - |
| hsa-miR-1275 | TMC5     | TMC5     | - |
| hsa-miR-1275 | TMCC1    | TMCC1    | - |
| hsa-miR-1275 | TMEM105  | TMEM105  | - |
| hsa-miR-1275 | TMEM106A | TMEM106A | - |
| hsa-miR-1275 | TMEM114  | TMEM114  | - |
| hsa-miR-1275 | TMEM151A | TMEM151A | - |
| hsa-miR-1275 | TMEM189  | TMEM189  | - |
| hsa-miR-1275 | TMEM189- | TMEM189- | - |

|              | UBE2V1    | UBE2V1    |   |
|--------------|-----------|-----------|---|
| hsa-miR-1275 | TMEM194A  | TMEM194A  | - |
| hsa-miR-1275 | TMEM198   | TMEM198   | - |
| hsa-miR-1275 | TMEM200B  | TMEM200B  | - |
| hsa-miR-1275 | TMEM209   | TMEM209   | - |
| hsa-miR-1275 | TMEM217   | TMEM217   | - |
| hsa-miR-1275 | TMEM26    | TMEM26    | - |
| hsa-miR-1275 | TMEM54    | TMEM54    | - |
| hsa-miR-1275 | TMEM57    | TMEM57    | - |
| hsa-miR-1275 | TMEM59L   | TMEM59L   | - |
| hsa-miR-1275 | TMEM63B   | TMEM63B   | - |
| hsa-miR-1275 | TMEM80    | TMEM80    | - |
| hsa-miR-1275 | TMEM95    | TMEM95    | - |
| hsa-miR-1275 | TMIGD2    | TMIGD2    | - |
| hsa-miR-1275 | TMOD1     | TMOD1     | - |
| hsa-miR-1275 | TMPRSS11D | TMPRSS11D | - |
| hsa-miR-1275 | TMPRSS13  | TMPRSS13  | - |
| hsa-miR-1275 | TMPRSS4   | TMPRSS4   | - |
| hsa-miR-1275 | TMTC1     | TMTC1     | - |
| hsa-miR-1275 | TMTC2     | TMTC2     | - |
| hsa-miR-1275 | TMX2      | TMX2      | - |
| hsa-miR-1275 | TNFAIP2   | TNFAIP2   | - |
| hsa-miR-1275 | TNFRSF9   | TNFRSF9   | - |
| hsa-miR-1275 | TNFSF12   | TNFSF12   | - |
| hsa-miR-1275 | TNK2      | TNK2      | - |
| hsa-miR-1275 | TNS3      | TNS3      | - |
| hsa-miR-1275 | TNS4      | TNS4      | - |
| hsa-miR-1275 | TOMM34    | TOMM34    | - |
| hsa-miR-1275 | TOMM70A   | TOMM70A   | - |
| hsa-miR-1275 | TPD52L3   | TPD52L3   | - |
| hsa-miR-1275 | TPP1      | TPP1      | - |
| hsa-miR-1275 | TRAF7     | TRAF7     | - |
| hsa-miR-1275 | TRAM2     | TRAM2     | - |
| hsa-miR-1275 | TRANK1    | TRANK1    | - |
| hsa-miR-1275 | TRAPPC9   | TRAPPC9   | - |
| hsa-miR-1275 | TRIL      | TRIL      | - |
| hsa-miR-1275 | TRIM28    | TRIM28    | - |
| hsa-miR-1275 | TRIM29    | TRIM29    | - |
| hsa-miR-1275 | TRIM3     | TRIM3     | - |
| hsa-miR-1275 | TRIM32    | TRIM32    | - |
| hsa-miR-1275 | TRIM4     | TRIM4     | - |
| hsa-miR-1275 | TRIM45    | TRIM45    | - |
| hsa-miR-1275 | TRIM46    | TRIM46    | - |
| hsa-miR-1275 | TRIM9     | TRIM9     | - |
| hsa-miR-1275 | TRIP10    | TRIP10    | - |
| hsa-miR-1275 | TRMT61A   | TRMT61A   | - |
| hsa-miR-1275 | TRPC4AP   | TRPC4AP   | - |
| hsa-miR-1275 | TRPS1     | TRPS1     | - |
| hsa-miR-1275 | TSGA10    | TSGA10    | - |
| hsa-miR-1275 | TSKU      | TSKU      | - |
| hsa-miR-1275 | TSPAN1    | TSPAN1    | - |

|              |          |          |   |
|--------------|----------|----------|---|
| hsa-miR-1275 | TSPAN11  | TSPAN11  | - |
| hsa-miR-1275 | TSPAN15  | TSPAN15  | - |
| hsa-miR-1275 | TSPAN18  | TSPAN18  | - |
| hsa-miR-1275 | TSPAN3   | TSPAN3   | - |
| hsa-miR-1275 | TSPYL2   | TSPYL2   | - |
| hsa-miR-1275 | TSSK1B   | TSSK1B   | - |
| hsa-miR-1275 | TTBK1    | TTBK1    | - |
| hsa-miR-1275 | TTC14    | TTC14    | - |
| hsa-miR-1275 | TTC31    | TTC31    | - |
| hsa-miR-1275 | TTC39B   | TTC39B   | - |
| hsa-miR-1275 | TTL6     | TTL6     | - |
| hsa-miR-1275 | TTYH2    | TTYH2    | - |
| hsa-miR-1275 | TUB      | TUB      | - |
| hsa-miR-1275 | TUBA8    | TUBA8    | - |
| hsa-miR-1275 | TUBAL3   | TUBAL3   | - |
| hsa-miR-1275 | TUBG1    | TUBG1    | - |
| hsa-miR-1275 | TWSG1    | TWSG1    | - |
| hsa-miR-1275 | TXK      | TXK      | - |
| hsa-miR-1275 | TYK2     | TYK2     | - |
| hsa-miR-1275 | UBAC2    | UBAC2    | - |
| hsa-miR-1275 | UBAP2L   | UBAP2L   | - |
| hsa-miR-1275 | UBE2N    | UBE2N    | - |
| hsa-miR-1275 | UBE2NL   | UBE2NL   | - |
| hsa-miR-1275 | UBE2QL1  | UBE2QL1  | - |
| hsa-miR-1275 | UBE2R2   | UBE2R2   | - |
| hsa-miR-1275 | UBE2V1   | UBE2V1   | - |
| hsa-miR-1275 | UBE2Z    | UBE2Z    | - |
| hsa-miR-1275 | UBL5     | UBL5     | - |
| hsa-miR-1275 | UBOX5    | UBOX5    | - |
| hsa-miR-1275 | UBQLN1   | UBQLN1   | - |
| hsa-miR-1275 | UBTF     | UBTF     | - |
| hsa-miR-1275 | UBXN10   | UBXN10   | - |
| hsa-miR-1275 | UCN      | UCN      | - |
| hsa-miR-1275 | UCN2     | UCN2     | - |
| hsa-miR-1275 | UHRF1    | UHRF1    | - |
| hsa-miR-1275 | UHRF1BP1 | UHRF1BP1 | - |
| hsa-miR-1275 | UNC119B  | UNC119B  | - |
| hsa-miR-1275 | UNC13A   | UNC13A   | - |
| hsa-miR-1275 | UNC5A    | UNC5A    | - |
| hsa-miR-1275 | UPF2     | UPF2     | - |
| hsa-miR-1275 | UPK2     | UPK2     | - |
| hsa-miR-1275 | UPK3BL   | UPK3BL   | - |
| hsa-miR-1275 | UPP2     | UPP2     | - |
| hsa-miR-1275 | UQCC     | UQCC     | - |
| hsa-miR-1275 | URM1     | URM1     | - |
| hsa-miR-1275 | USF2     | USF2     | - |
| hsa-miR-1275 | USP20    | USP20    | - |
| hsa-miR-1275 | USP4     | USP4     | - |
| hsa-miR-1275 | USP40    | USP40    | - |
| hsa-miR-1275 | USP5     | USP5     | - |
| hsa-miR-1275 | UST      | UST      | - |



|              |         |         |   |
|--------------|---------|---------|---|
| hsa-miR-1275 | VAMP1   | VAMP1   | - |
| hsa-miR-1275 | VAMP2   | VAMP2   | - |
| hsa-miR-1275 | VAPA    | VAPA    | - |
| hsa-miR-1275 | VDAC2   | VDAC2   | - |
| hsa-miR-1275 | VEZT    | VEZT    | - |
| hsa-miR-1275 | VIPR2   | VIPR2   | - |
| hsa-miR-1275 | VPS13A  | VPS13A  | - |
| hsa-miR-1275 | VPS25   | VPS25   | - |
| hsa-miR-1275 | VPS26B  | VPS26B  | - |
| hsa-miR-1275 | VPS36   | VPS36   | - |
| hsa-miR-1275 | VPS37B  | VPS37B  | - |
| hsa-miR-1275 | VPS37D  | VPS37D  | - |
| hsa-miR-1275 | VSTM2L  | VSTM2L  | - |
| hsa-miR-1275 | VTN     | VTN     | - |
| hsa-miR-1275 | VWA2    | VWA2    | - |
| hsa-miR-1275 | VWA5B2  | VWA5B2  | - |
| hsa-miR-1275 | WBP4    | WBP4    | - |
| hsa-miR-1275 | WDFY1   | WDFY1   | - |
| hsa-miR-1275 | WDR20   | WDR20   | - |
| hsa-miR-1275 | WDR26   | WDR26   | - |
| hsa-miR-1275 | WDR59   | WDR59   | - |
| hsa-miR-1275 | WDR72   | WDR72   | - |
| hsa-miR-1275 | WDR77   | WDR77   | - |
| hsa-miR-1275 | WDR89   | WDR89   | - |
| hsa-miR-1275 | WFS1    | WFS1    | - |
| hsa-miR-1275 | WIPF3   | WIPF3   | - |
| hsa-miR-1275 | WISP1   | WISP1   | - |
| hsa-miR-1275 | WIZ     | WIZ     | - |
| hsa-miR-1275 | WNK4    | WNK4    | - |
| hsa-miR-1275 | WNT1    | WNT1    | - |
| hsa-miR-1275 | WNT7A   | WNT7A   | - |
| hsa-miR-1275 | WNT7B   | WNT7B   | - |
| hsa-miR-1275 | WSCD1   | WSCD1   | - |
| hsa-miR-1275 | WSCD2   | WSCD2   | - |
| hsa-miR-1275 | XAB2    | XAB2    | - |
| hsa-miR-1275 | XIRP1   | XIRP1   | - |
| hsa-miR-1275 | XKR6    | XKR6    | - |
| hsa-miR-1275 | XKR8    | XKR8    | - |
| hsa-miR-1275 | XRCC3   | XRCC3   | - |
| hsa-miR-1275 | YIF1B   | YIF1B   | - |
| hsa-miR-1275 | ZBTB33  | ZBTB33  | - |
| hsa-miR-1275 | ZBTB5   | ZBTB5   | - |
| hsa-miR-1275 | ZBTB7A  | ZBTB7A  | - |
| hsa-miR-1275 | ZBTB7B  | ZBTB7B  | - |
| hsa-miR-1275 | ZC3H3   | ZC3H3   | - |
| hsa-miR-1275 | ZC3H6   | ZC3H6   | - |
| hsa-miR-1275 | ZDHHC15 | ZDHHC15 | - |
| hsa-miR-1275 | ZER1    | ZER1    | - |
| hsa-miR-1275 | ZFAND1  | ZFAND1  | - |
| hsa-miR-1275 | ZFC3H1  | ZFC3H1  | - |
| hsa-miR-1275 | ZFP36   | ZFP36   | - |

|               |         |         |        |
|---------------|---------|---------|--------|
| hsa-miR-1275  | ZFP36L1 | ZFP36L1 | -      |
| hsa-miR-1275  | ZFP36L2 | ZFP36L2 | -      |
| hsa-miR-1275  | ZMIZ1   | ZMIZ1   | -      |
| hsa-miR-1275  | ZMIZ2   | ZMIZ2   | -      |
| hsa-miR-1275  | ZMYND17 | ZMYND17 | -      |
| hsa-miR-1275  | ZNF187  | ZNF187  | -      |
| hsa-miR-1275  | ZNF192  | ZNF192  | -      |
| hsa-miR-1275  | ZNF20   | ZNF20   | -      |
| hsa-miR-1275  | ZNF229  | ZNF229  | -      |
| hsa-miR-1275  | ZNF250  | ZNF250  | -      |
| hsa-miR-1275  | ZNF26   | ZNF26   | -      |
| hsa-miR-1275  | ZNF275  | ZNF275  | -      |
| hsa-miR-1275  | ZNF276  | ZNF276  | -      |
| hsa-miR-1275  | ZNF32   | ZNF32   | -      |
| hsa-miR-1275  | ZNF322A | ZNF322A | -      |
| hsa-miR-1275  | ZNF343  | ZNF343  | -      |
| hsa-miR-1275  | ZNF346  | ZNF346  | -      |
| hsa-miR-1275  | ZNF385B | ZNF385B | -      |
| hsa-miR-1275  | ZNF440  | ZNF440  | -      |
| hsa-miR-1275  | ZNF444  | ZNF444  | -      |
| hsa-miR-1275  | ZNF446  | ZNF446  | -      |
| hsa-miR-1275  | ZNF469  | ZNF469  | -      |
| hsa-miR-1275  | ZNF474  | ZNF474  | -      |
| hsa-miR-1275  | ZNF497  | ZNF497  | -      |
| hsa-miR-1275  | ZNF500  | ZNF500  | -      |
| hsa-miR-1275  | ZNF501  | ZNF501  | -      |
| hsa-miR-1275  | ZNF524  | ZNF524  | -      |
| hsa-miR-1275  | ZNF527  | ZNF527  | -      |
| hsa-miR-1275  | ZNF564  | ZNF564  | -      |
| hsa-miR-1275  | ZNF605  | ZNF605  | -      |
| hsa-miR-1275  | ZNF629  | ZNF629  | -      |
| hsa-miR-1275  | ZNF646  | ZNF646  | -      |
| hsa-miR-1275  | ZNF648  | ZNF648  | -      |
| hsa-miR-1275  | ZNF673  | ZNF673  | -      |
| hsa-miR-1275  | ZNF678  | ZNF678  | -      |
| hsa-miR-1275  | ZNF691  | ZNF691  | -      |
| hsa-miR-1275  | ZNF70   | ZNF70   | -      |
| hsa-miR-1275  | ZNF704  | ZNF704  | -      |
| hsa-miR-1275  | ZNF793  | ZNF793  | -      |
| hsa-miR-1275  | ZNF823  | ZNF823  | -      |
| hsa-miR-1275  | ZNRF2   | ZNRF2   | -      |
| hsa-miR-1275  | ZNRF3   | ZNRF3   | -      |
| hsa-miR-1275  | ZPLD1   | ZPLD1   | -      |
| hsa-miR-1275  | ZSCAN5B | ZSCAN5B | -      |
| hsa-miR-1275  | ZSWIM3  | ZSWIM3  | -      |
| hsa-miR-1275  | ZSWIM4  | ZSWIM4  | -      |
| hsa-miR-1275  | ZSWIM5  | ZSWIM5  | -      |
| hsa-miR-1275  | ZYX     | ZYX     | -      |
| hsa-miR-130a* | -       | AADAC   | AADAC  |
| hsa-miR-130a* | -       | ABCA10  | ABCA10 |
| hsa-miR-130a* | -       | ABCA5   | ABCA5  |

|               |   |           |           |
|---------------|---|-----------|-----------|
| hsa-miR-130a* | - | ABCA8     | ABCA8     |
| hsa-miR-130a* | - | ACAA1     | ACAA1     |
| hsa-miR-130a* | - | ACO1      | ACO1      |
| hsa-miR-130a* | - | ACRC      | ACRC      |
| hsa-miR-130a* | - | ADD3      | ADD3      |
| hsa-miR-130a* | - | AKT3      | AKT3      |
| hsa-miR-130a* | - | ALDH9A1   | ALDH9A1   |
| hsa-miR-130a* | - | ALG6      | ALG6      |
| hsa-miR-130a* | - | ALPK1     | ALPK1     |
| hsa-miR-130a* | - | ANGPTL1   | ANGPTL1   |
| hsa-miR-130a* | - | ANKHD1    | ANKHD1    |
| hsa-miR-130a* | - | ANKMY2    | ANKMY2    |
| hsa-miR-130a* | - | ANKRD10   | ANKRD10   |
| hsa-miR-130a* | - | ANKRD26   | ANKRD26   |
| hsa-miR-130a* | - | AP1S1     | AP1S1     |
| hsa-miR-130a* | - | ARHGAP27  | ARHGAP27  |
| hsa-miR-130a* | - | ARHGEF5   | ARHGEF5   |
| hsa-miR-130a* | - | ARMC2     | ARMC2     |
| hsa-miR-130a* | - | ARMCX1    | ARMCX1    |
| hsa-miR-130a* | - | ARPC1B    | ARPC1B    |
| hsa-miR-130a* | - | ARR3      | ARR3      |
| hsa-miR-130a* | - | ASB15     | ASB15     |
| hsa-miR-130a* | - | ASF1A     | ASF1A     |
| hsa-miR-130a* | - | ASNS      | ASNS      |
| hsa-miR-130a* | - | ATE1      | ATE1      |
| hsa-miR-130a* | - | ATP8A2    | ATP8A2    |
| hsa-miR-130a* | - | ATPIF1    | ATPIF1    |
| hsa-miR-130a* | - | AUH       | AUH       |
| hsa-miR-130a* | - | AUTS2     | AUTS2     |
| hsa-miR-130a* | - | AZI2      | AZI2      |
| hsa-miR-130a* | - | B3GALT2   | B3GALT2   |
| hsa-miR-130a* | - | BECN1     | BECN1     |
| hsa-miR-130a* | - | BPIL2     | BPIL2     |
| hsa-miR-130a* | - | BTNL8     | BTNL8     |
| hsa-miR-130a* | - | C11orf34  | C11orf34  |
| hsa-miR-130a* | - | C11orf59  | C11orf59  |
| hsa-miR-130a* | - | C12orf54  | C12orf54  |
| hsa-miR-130a* | - | C12orf62  | C12orf62  |
| hsa-miR-130a* | - | C13orf27  | C13orf27  |
| hsa-miR-130a* | - | C14orf102 | C14orf102 |
| hsa-miR-130a* | - | C14orf135 | C14orf135 |
| hsa-miR-130a* | - | C15orf32  | C15orf32  |
| hsa-miR-130a* | - | C15orf40  | C15orf40  |
| hsa-miR-130a* | - | C16orf55  | C16orf55  |
| hsa-miR-130a* | - | C17orf58  | C17orf58  |
| hsa-miR-130a* | - | C17orf81  | C17orf81  |
| hsa-miR-130a* | - | C18orf56  | C18orf56  |
| hsa-miR-130a* | - | C1orf131  | C1orf131  |
| hsa-miR-130a* | - | C1orf146  | C1orf146  |
| hsa-miR-130a* | - | C1orf65   | C1orf65   |
| hsa-miR-130a* | - | C20orf111 | C20orf111 |

|               |   |           |           |
|---------------|---|-----------|-----------|
| hsa-miR-130a* | - | C6orf146  | C6orf146  |
| hsa-miR-130a* | - | C6orf59   | C6orf59   |
| hsa-miR-130a* | - | C8orf58   | C8orf58   |
| hsa-miR-130a* | - | CA2       | CA2       |
| hsa-miR-130a* | - | CA5A      | CA5A      |
| hsa-miR-130a* | - | CA9       | CA9       |
| hsa-miR-130a* | - | CACNA2D3  | CACNA2D3  |
| hsa-miR-130a* | - | CCDC132   | CCDC132   |
| hsa-miR-130a* | - | CCDC36    | CCDC36    |
| hsa-miR-130a* | - | CCDC83    | CCDC83    |
| hsa-miR-130a* | - | CCK       | CCK       |
| hsa-miR-130a* | - | CCL7      | CCL7      |
| hsa-miR-130a* | - | CCM2      | CCM2      |
| hsa-miR-130a* | - | CCNH      | CCNH      |
| hsa-miR-130a* | - | CD1B      | CD1B      |
| hsa-miR-130a* | - | CDADC1    | CDADC1    |
| hsa-miR-130a* | - | CDC37L1   | CDC37L1   |
| hsa-miR-130a* | - | CDKL3     | CDKL3     |
| hsa-miR-130a* | - | CFDP1     | CFDP1     |
| hsa-miR-130a* | - | CHD7      | CHD7      |
| hsa-miR-130a* | - | CHGB      | CHGB      |
| hsa-miR-130a* | - | CHST7     | CHST7     |
| hsa-miR-130a* | - | CIB2      | CIB2      |
| hsa-miR-130a* | - | CKAP4     | CKAP4     |
| hsa-miR-130a* | - | CLCN3     | CLCN3     |
| hsa-miR-130a* | - | CLDN14    | CLDN14    |
| hsa-miR-130a* | - | CLK3      | CLK3      |
| hsa-miR-130a* | - | CMAH      | CMAH      |
| hsa-miR-130a* | - | CNKSR2    | CNKSR2    |
| hsa-miR-130a* | - | COL11A2   | COL11A2   |
| hsa-miR-130a* | - | COL6A1    | COL6A1    |
| hsa-miR-130a* | - | COMMD6    | COMMD6    |
| hsa-miR-130a* | - | CSN3      | CSN3      |
| hsa-miR-130a* | - | CSNK1G3   | CSNK1G3   |
| hsa-miR-130a* | - | CSNK2A2   | CSNK2A2   |
| hsa-miR-130a* | - | CTSC      | CTSC      |
| hsa-miR-130a* | - | CXCL2     | CXCL2     |
| hsa-miR-130a* | - | DCBLD1    | DCBLD1    |
| hsa-miR-130a* | - | DCUN1D5   | DCUN1D5   |
| hsa-miR-130a* | - | DDB1      | DDB1      |
| hsa-miR-130a* | - | DFFB      | DFFB      |
| hsa-miR-130a* | - | DHRS13    | DHRS13    |
| hsa-miR-130a* | - | DHX15     | DHX15     |
| hsa-miR-130a* | - | DIS3L     | DIS3L     |
| hsa-miR-130a* | - | DLEU2L    | DLEU2L    |
| hsa-miR-130a* | - | DPY19L2P1 | DPY19L2P1 |
| hsa-miR-130a* | - | DPYD      | DPYD      |
| hsa-miR-130a* | - | DYNLT1    | DYNLT1    |
| hsa-miR-130a* | - | E2F8      | E2F8      |
| hsa-miR-130a* | - | EGR2      | EGR2      |
| hsa-miR-130a* | - | ELOVL3    | ELOVL3    |

|               |   |         |         |
|---------------|---|---------|---------|
| hsa-miR-130a* | - | ERH     | ERH     |
| hsa-miR-130a* | - | ETV3    | ETV3    |
| hsa-miR-130a* | - | EXOC1   | EXOC1   |
| hsa-miR-130a* | - | EXOSC7  | EXOSC7  |
| hsa-miR-130a* | - | FAHD1   | FAHD1   |
| hsa-miR-130a* | - | FAM118B | FAM118B |
| hsa-miR-130a* | - | FAM22F  | FAM22F  |
| hsa-miR-130a* | - | FAM26D  | FAM26D  |
| hsa-miR-130a* | - | FAM48A  | FAM48A  |
| hsa-miR-130a* | - | FAM71C  | FAM71C  |
| hsa-miR-130a* | - | FAM9C   | FAM9C   |
| hsa-miR-130a* | - | FASTKD3 | FASTKD3 |
| hsa-miR-130a* | - | FBP2    | FBP2    |
| hsa-miR-130a* | - | FBXO25  | FBXO25  |
| hsa-miR-130a* | - | FBXO32  | FBXO32  |
| hsa-miR-130a* | - | FCGBP   | FCGBP   |
| hsa-miR-130a* | - | FCRL2   | FCRL2   |
| hsa-miR-130a* | - | FILIP1  | FILIP1  |
| hsa-miR-130a* | - | FNDCC5  | FNDCC5  |
| hsa-miR-130a* | - | FOXP2   | FOXP2   |
| hsa-miR-130a* | - | FREM2   | FREM2   |
| hsa-miR-130a* | - | FSHR    | FSHR    |
| hsa-miR-130a* | - | FUCA2   | FUCA2   |
| hsa-miR-130a* | - | FUT1    | FUT1    |
| hsa-miR-130a* | - | GALNT6  | GALNT6  |
| hsa-miR-130a* | - | GCM2    | GCM2    |
| hsa-miR-130a* | - | GGCX    | GGCX    |
| hsa-miR-130a* | - | GIMAP7  | GIMAP7  |
| hsa-miR-130a* | - | GLB1L3  | GLB1L3  |
| hsa-miR-130a* | - | GLT6D1  | GLT6D1  |
| hsa-miR-130a* | - | GPBP1   | GPBP1   |
| hsa-miR-130a* | - | GPR22   | GPR22   |
| hsa-miR-130a* | - | GPR37   | GPR37   |
| hsa-miR-130a* | - | GRTP1   | GRTP1   |
| hsa-miR-130a* | - | HEBP1   | HEBP1   |
| hsa-miR-130a* | - | HES2    | HES2    |
| hsa-miR-130a* | - | HFE     | HFE     |
| hsa-miR-130a* | - | HIBCH   | HIBCH   |
| hsa-miR-130a* | - | HLA-B   | HLA-B   |
| hsa-miR-130a* | - | HLA-C   | HLA-C   |
| hsa-miR-130a* | - | HLA-E   | HLA-E   |
| hsa-miR-130a* | - | HLA-G   | HLA-G   |
| hsa-miR-130a* | - | HLA-J   | HLA-J   |
| hsa-miR-130a* | - | HNF4G   | HNF4G   |
| hsa-miR-130a* | - | HOOK2   | HOOK2   |
| hsa-miR-130a* | - | HOXD10  | HOXD10  |
| hsa-miR-130a* | - | HRG     | HRG     |
| hsa-miR-130a* | - | HSF2BP  | HSF2BP  |
| hsa-miR-130a* | - | HSP90B1 | HSP90B1 |
| hsa-miR-130a* | - | IFNA4   | IFNA4   |
| hsa-miR-130a* | - | IGSF8   | IGSF8   |

|               |   |           |           |
|---------------|---|-----------|-----------|
| hsa-miR-130a* | - | INTS6     | INTS6     |
| hsa-miR-130a* | - | INTU      | INTU      |
| hsa-miR-130a* | - | IPPK      | IPPK      |
| hsa-miR-130a* | - | IQCB1     | IQCB1     |
| hsa-miR-130a* | - | ISCA2     | ISCA2     |
| hsa-miR-130a* | - | JAK1      | JAK1      |
| hsa-miR-130a* | - | KCTD3     | KCTD3     |
| hsa-miR-130a* | - | KIAA0922  | KIAA0922  |
| hsa-miR-130a* | - | KIAA1107  | KIAA1107  |
| hsa-miR-130a* | - | KIAA1704  | KIAA1704  |
| hsa-miR-130a* | - | KLHL28    | KLHL28    |
| hsa-miR-130a* | - | KLRF1     | KLRF1     |
| hsa-miR-130a* | - | KRTAP13-2 | KRTAP13-2 |
| hsa-miR-130a* | - | KRTAP4-9  | KRTAP4-9  |
| hsa-miR-130a* | - | LAMP1     | LAMP1     |
| hsa-miR-130a* | - | LDHB      | LDHB      |
| hsa-miR-130a* | - | LHX4      | LHX4      |
| hsa-miR-130a* | - | LIM2      | LIM2      |
| hsa-miR-130a* | - | LMAN2     | LMAN2     |
| hsa-miR-130a* | - | LONRF3    | LONRF3    |
| hsa-miR-130a* | - | LPHN2     | LPHN2     |
| hsa-miR-130a* | - | LRP5      | LRP5      |
| hsa-miR-130a* | - | LRRIQ1    | LRRIQ1    |
| hsa-miR-130a* | - | LTV1      | LTV1      |
| hsa-miR-130a* | - | LYNX1     | LYNX1     |
| hsa-miR-130a* | - | MAB21L2   | MAB21L2   |
| hsa-miR-130a* | - | MAD2L1BP  | MAD2L1BP  |
| hsa-miR-130a* | - | MADD      | MADD      |
| hsa-miR-130a* | - | MANBA     | MANBA     |
| hsa-miR-130a* | - | MAP3K5    | MAP3K5    |
| hsa-miR-130a* | - | MARCKSL1  | MARCKSL1  |
| hsa-miR-130a* | - | MAX       | MAX       |
| hsa-miR-130a* | - | MCM3AP    | MCM3AP    |
| hsa-miR-130a* | - | MDFI      | MDFI      |
| hsa-miR-130a* | - | MED12     | MED12     |
| hsa-miR-130a* | - | MESP1     | MESP1     |
| hsa-miR-130a* | - | METTL2B   | METTL2B   |
| hsa-miR-130a* | - | MIER1     | MIER1     |
| hsa-miR-130a* | - | MRC1      | MRC1      |
| hsa-miR-130a* | - | MRC2      | MRC2      |
| hsa-miR-130a* | - | MRGPRF    | MRGPRF    |
| hsa-miR-130a* | - | MRPL38    | MRPL38    |
| hsa-miR-130a* | - | MRPS23    | MRPS23    |
| hsa-miR-130a* | - | MRPS33    | MRPS33    |
| hsa-miR-130a* | - | MT2A      | MT2A      |
| hsa-miR-130a* | - | MTERFD1   | MTERFD1   |
| hsa-miR-130a* | - | MTHFS     | MTHFS     |
| hsa-miR-130a* | - | MTMR8     | MTMR8     |
| hsa-miR-130a* | - | MYH1      | MYH1      |
| hsa-miR-130a* | - | MYH2      | MYH2      |
| hsa-miR-130a* | - | MYH4      | MYH4      |

|               |   |          |          |
|---------------|---|----------|----------|
| hsa-miR-130a* | - | MYO16    | MYO16    |
| hsa-miR-130a* | - | NAP1L5   | NAP1L5   |
| hsa-miR-130a* | - | NCOA6    | NCOA6    |
| hsa-miR-130a* | - | NDFIP2   | NDFIP2   |
| hsa-miR-130a* | - | NDUFA2   | NDUFA2   |
| hsa-miR-130a* | - | NDUFA3   | NDUFA3   |
| hsa-miR-130a* | - | NDUFA7   | NDUFA7   |
| hsa-miR-130a* | - | NDUFC1   | NDUFC1   |
| hsa-miR-130a* | - | NEDD9    | NEDD9    |
| hsa-miR-130a* | - | NEFH     | NEFH     |
| hsa-miR-130a* | - | NEFL     | NEFL     |
| hsa-miR-130a* | - | NEK10    | NEK10    |
| hsa-miR-130a* | - | NEU1     | NEU1     |
| hsa-miR-130a* | - | NFX1     | NFX1     |
| hsa-miR-130a* | - | NLGN4X   | NLGN4X   |
| hsa-miR-130a* | - | NOL8     | NOL8     |
| hsa-miR-130a* | - | NPHS2    | NPHS2    |
| hsa-miR-130a* | - | NR6A1    | NR6A1    |
| hsa-miR-130a* | - | OFD1     | OFD1     |
| hsa-miR-130a* | - | OLAH     | OLAH     |
| hsa-miR-130a* | - | OXNAD1   | OXNAD1   |
| hsa-miR-130a* | - | P2RY10   | P2RY10   |
| hsa-miR-130a* | - | PAGE4    | PAGE4    |
| hsa-miR-130a* | - | PAK3     | PAK3     |
| hsa-miR-130a* | - | PANX3    | PANX3    |
| hsa-miR-130a* | - | PARL     | PARL     |
| hsa-miR-130a* | - | PCMT1    | PCMT1    |
| hsa-miR-130a* | - | PDE4B    | PDE4B    |
| hsa-miR-130a* | - | PDE7A    | PDE7A    |
| hsa-miR-130a* | - | PDGFA    | PDGFA    |
| hsa-miR-130a* | - | PEBP1    | PEBP1    |
| hsa-miR-130a* | - | PIGF     | PIGF     |
| hsa-miR-130a* | - | PJA1     | PJA1     |
| hsa-miR-130a* | - | PKD1L2   | PKD1L2   |
| hsa-miR-130a* | - | PLA2G4C  | PLA2G4C  |
| hsa-miR-130a* | - | PLA2R1   | PLA2R1   |
| hsa-miR-130a* | - | PLAU     | PLAU     |
| hsa-miR-130a* | - | PNRC1    | PNRC1    |
| hsa-miR-130a* | - | PNRC2    | PNRC2    |
| hsa-miR-130a* | - | POLR1C   | POLR1C   |
| hsa-miR-130a* | - | POU2F1   | POU2F1   |
| hsa-miR-130a* | - | PPP1CB   | PPP1CB   |
| hsa-miR-130a* | - | PPP1R13B | PPP1R13B |
| hsa-miR-130a* | - | PPP3CB   | PPP3CB   |
| hsa-miR-130a* | - | PRAME    | PRAME    |
| hsa-miR-130a* | - | PRAMEF12 | PRAMEF12 |
| hsa-miR-130a* | - | PRDX3    | PRDX3    |
| hsa-miR-130a* | - | PRKAG1   | PRKAG1   |
| hsa-miR-130a* | - | PRKCSH   | PRKCSH   |
| hsa-miR-130a* | - | PSD3     | PSD3     |
| hsa-miR-130a* | - | PSPC1    | PSPC1    |

|               |   |          |          |
|---------------|---|----------|----------|
| hsa-miR-130a* | - | PTPLA    | PTPLA    |
| hsa-miR-130a* | - | PTPRK    | PTPRK    |
| hsa-miR-130a* | - | R3HDM1   | R3HDM1   |
| hsa-miR-130a* | - | RBBP6    | RBBP6    |
| hsa-miR-130a* | - | RBM12B   | RBM12B   |
| hsa-miR-130a* | - | RBM26    | RBM26    |
| hsa-miR-130a* | - | RGAG1    | RGAG1    |
| hsa-miR-130a* | - | RGS8     | RGS8     |
| hsa-miR-130a* | - | RNF10    | RNF10    |
| hsa-miR-130a* | - | RNF135   | RNF135   |
| hsa-miR-130a* | - | RNF168   | RNF168   |
| hsa-miR-130a* | - | RXRG     | RXRG     |
| hsa-miR-130a* | - | S100Z    | S100Z    |
| hsa-miR-130a* | - | SAFB     | SAFB     |
| hsa-miR-130a* | - | SAFB2    | SAFB2    |
| hsa-miR-130a* | - | SALL2    | SALL2    |
| hsa-miR-130a* | - | SAMD3    | SAMD3    |
| hsa-miR-130a* | - | SCG5     | SCG5     |
| hsa-miR-130a* | - | SCN8A    | SCN8A    |
| hsa-miR-130a* | - | SCPEP1   | SCPEP1   |
| hsa-miR-130a* | - | SEC23B   | SEC23B   |
| hsa-miR-130a* | - | SEC24A   | SEC24A   |
| hsa-miR-130a* | - | SECISBP2 | SECISBP2 |
| hsa-miR-130a* | - | SEPT12   | SEPT12   |
| hsa-miR-130a* | - | SERPINB7 | SERPINB7 |
| hsa-miR-130a* | - | SFRS15   | SFRS15   |
| hsa-miR-130a* | - | SH2D3A   | SH2D3A   |
| hsa-miR-130a* | - | SH3BGR   | SH3BGR   |
| hsa-miR-130a* | - | SHFM1    | SHFM1    |
| hsa-miR-130a* | - | SI       | SI       |
| hsa-miR-130a* | - | SLC18A1  | SLC18A1  |
| hsa-miR-130a* | - | SLC20A1  | SLC20A1  |
| hsa-miR-130a* | - | SLC25A17 | SLC25A17 |
| hsa-miR-130a* | - | SLC25A27 | SLC25A27 |
| hsa-miR-130a* | - | SLC25A4  | SLC25A4  |
| hsa-miR-130a* | - | SLC4A8   | SLC4A8   |
| hsa-miR-130a* | - | SLC5A10  | SLC5A10  |
| hsa-miR-130a* | - | SMN1     | SMN1     |
| hsa-miR-130a* | - | SMN2     | SMN2     |
| hsa-miR-130a* | - | SMPX     | SMPX     |
| hsa-miR-130a* | - | SMS      | SMS      |
| hsa-miR-130a* | - | SNRPC    | SNRPC    |
| hsa-miR-130a* | - | SNRPE    | SNRPE    |
| hsa-miR-130a* | - | SNTG1    | SNTG1    |
| hsa-miR-130a* | - | SOCS6    | SOCS6    |
| hsa-miR-130a* | - | SP100    | SP100    |
| hsa-miR-130a* | - | SPACA1   | SPACA1   |
| hsa-miR-130a* | - | SPATA5L1 | SPATA5L1 |
| hsa-miR-130a* | - | SPP2     | SPP2     |
| hsa-miR-130a* | - | SRPX     | SRPX     |
| hsa-miR-130a* | - | STAG3    | STAG3    |



|               |   |           |           |
|---------------|---|-----------|-----------|
| hsa-miR-130a* | - | STAT5A    | STAT5A    |
| hsa-miR-130a* | - | STK32C    | STK32C    |
| hsa-miR-130a* | - | T         | T         |
| hsa-miR-130a* | - | TACR3     | TACR3     |
| hsa-miR-130a* | - | TARDBP    | TARDBP    |
| hsa-miR-130a* | - | TARS      | TARS      |
| hsa-miR-130a* | - | TATDN3    | TATDN3    |
| hsa-miR-130a* | - | TBCA      | TBCA      |
| hsa-miR-130a* | - | TBX18     | TBX18     |
| hsa-miR-130a* | - | TBXA2R    | TBXA2R    |
| hsa-miR-130a* | - | TCAP      | TCAP      |
| hsa-miR-130a* | - | TFR2      | TFR2      |
| hsa-miR-130a* | - | TGIF1     | TGIF1     |
| hsa-miR-130a* | - | THSD1     | THSD1     |
| hsa-miR-130a* | - | THUMPD2   | THUMPD2   |
| hsa-miR-130a* | - | TIMM10    | TIMM10    |
| hsa-miR-130a* | - | TM2D1     | TM2D1     |
| hsa-miR-130a* | - | TMED5     | TMED5     |
| hsa-miR-130a* | - | TMEM101   | TMEM101   |
| hsa-miR-130a* | - | TMEM85    | TMEM85    |
| hsa-miR-130a* | - | TMPO      | TMPO      |
| hsa-miR-130a* | - | TNFRSF10B | TNFRSF10B |
| hsa-miR-130a* | - | TNRC6A    | TNRC6A    |
| hsa-miR-130a* | - | TNRC6C    | TNRC6C    |
| hsa-miR-130a* | - | TOM1L1    | TOM1L1    |
| hsa-miR-130a* | - | TOMM22    | TOMM22    |
| hsa-miR-130a* | - | TOP2B     | TOP2B     |
| hsa-miR-130a* | - | TPM1      | TPM1      |
| hsa-miR-130a* | - | TRIM14    | TRIM14    |
| hsa-miR-130a* | - | TRIM63    | TRIM63    |
| hsa-miR-130a* | - | TTC15     | TTC15     |
| hsa-miR-130a* | - | TTF1      | TTF1      |
| hsa-miR-130a* | - | UBAP2     | UBAP2     |
| hsa-miR-130a* | - | UBL4A     | UBL4A     |
| hsa-miR-130a* | - | UBL4B     | UBL4B     |
| hsa-miR-130a* | - | UBQLN3    | UBQLN3    |
| hsa-miR-130a* | - | UGT2B15   | UGT2B15   |
| hsa-miR-130a* | - | UMODL1    | UMODL1    |
| hsa-miR-130a* | - | UQCRFS1   | UQCRFS1   |
| hsa-miR-130a* | - | VASH2     | VASH2     |
| hsa-miR-130a* | - | VRK3      | VRK3      |
| hsa-miR-130a* | - | VSNL1     | VSNL1     |
| hsa-miR-130a* | - | WBP2      | WBP2      |
| hsa-miR-130a* | - | WBP2NL    | WBP2NL    |
| hsa-miR-130a* | - | WDR20     | WDR20     |
| hsa-miR-130a* | - | XKR3      | XKR3      |
| hsa-miR-130a* | - | ZC3H8     | ZC3H8     |
| hsa-miR-130a* | - | ZMYM2     | ZMYM2     |
| hsa-miR-130a* | - | ZMYM6     | ZMYM6     |
| hsa-miR-130a* | - | ZMYND11   | ZMYND11   |
| hsa-miR-130a* | - | ZNF100    | ZNF100    |

|               |          |          |          |
|---------------|----------|----------|----------|
| hsa-miR-130a* | -        | ZNF121   | ZNF121   |
| hsa-miR-130a* | -        | ZNF124   | ZNF124   |
| hsa-miR-130a* | -        | ZNF160   | ZNF160   |
| hsa-miR-130a* | -        | ZNF267   | ZNF267   |
| hsa-miR-130a* | -        | ZNF274   | ZNF274   |
| hsa-miR-130a* | -        | ZNF281   | ZNF281   |
| hsa-miR-130a* | -        | ZNF287   | ZNF287   |
| hsa-miR-130a* | -        | ZNF30    | ZNF30    |
| hsa-miR-130a* | -        | ZNF419   | ZNF419   |
| hsa-miR-130a* | -        | ZNF420   | ZNF420   |
| hsa-miR-130a* | -        | ZNF454   | ZNF454   |
| hsa-miR-130a* | -        | ZNF560   | ZNF560   |
| hsa-miR-130a* | -        | ZNF669   | ZNF669   |
| hsa-miR-130a* | -        | ZNF681   | ZNF681   |
| hsa-miR-130a* | -        | ZNF77    | ZNF77    |
| hsa-miR-130a* | -        | ZNF782   | ZNF782   |
| hsa-miR-130a* | -        | ZNF85    | ZNF85    |
| hsa-miR-130a* | -        | ZNF90    | ZNF90    |
| hsa-miR-132   | ABCG4    | ABCG4    | -        |
| hsa-miR-132   | -        | ABHD3    | ABHD3    |
| hsa-miR-132   | ABHD5    | ABHD5    | -        |
| hsa-miR-132   | ABR      | ABR      | -        |
| hsa-miR-132   | -        | ACAD9    | ACAD9    |
| hsa-miR-132   | -        | ACADM    | ACADM    |
| hsa-miR-132   | -        | ACP2     | ACP2     |
| hsa-miR-132   | -        | ACSM3    | ACSM3    |
| hsa-miR-132   | ACVR2B   | -        | ACVR2B   |
| hsa-miR-132   | -        | ADAL     | ADAL     |
| hsa-miR-132   | ADAMTS5  | ADAMTS5  | -        |
| hsa-miR-132   | -        | ADAMTSL1 | ADAMTSL1 |
| hsa-miR-132   | ADCY3    | ADCY3    | -        |
| hsa-miR-132   | -        | ADRA1A   | ADRA1A   |
| hsa-miR-132   | -        | AGTPBP1  | AGTPBP1  |
| hsa-miR-132   | -        | AHCY     | AHCY     |
| hsa-miR-132   | -        | ALDH1A1  | ALDH1A1  |
| hsa-miR-132   | AMD1     | AMD1     | -        |
| hsa-miR-132   | ANKRD34C | ANKRD34C | -        |
| hsa-miR-132   | ANKRD40  | ANKRD40  | -        |
| hsa-miR-132   | ANO1     | ANO1     | -        |
| hsa-miR-132   | -        | ANXA4    | ANXA4    |
| hsa-miR-132   | APAF1    | APAF1    | -        |
| hsa-miR-132   | -        | APC      | APC      |
| hsa-miR-132   | -        | APOA1BP  | APOA1BP  |
| hsa-miR-132   | -        | APOLD1   | APOLD1   |
| hsa-miR-132   | ARFGAP2  | ARFGAP2  | -        |
| hsa-miR-132   | ARHGAP32 | ARHGAP32 | -        |
| hsa-miR-132   | ARHGEF10 | ARHGEF10 | -        |
| hsa-miR-132   | ARHGEF11 | ARHGEF11 | -        |
| hsa-miR-132   | -        | ARID1A   | ARID1A   |
| hsa-miR-132   | ARID2    | ARID2    | -        |
| hsa-miR-132   | -        | ARID4B   | ARID4B   |

|             |           |           |           |
|-------------|-----------|-----------|-----------|
| hsa-miR-132 | ARIH1     | ARIH1     | -         |
| hsa-miR-132 | -         | ARMC5     | ARMC5     |
| hsa-miR-132 | -         | ARMC8     | ARMC8     |
| hsa-miR-132 | ASB1      | -         | ASB1      |
| hsa-miR-132 | -         | ATP6V0D1  | ATP6V0D1  |
| hsa-miR-132 | ATXN1     | ATXN1     | -         |
| hsa-miR-132 | -         | AZIN1     | AZIN1     |
| hsa-miR-132 | -         | B3GNT8    | B3GNT8    |
| hsa-miR-132 | B4GALT6   | B4GALT6   | -         |
| hsa-miR-132 | BBX       | BBX       | -         |
| hsa-miR-132 | -         | BCL2L11   | BCL2L11   |
| hsa-miR-132 | -         | BLCAP     | BLCAP     |
| hsa-miR-132 | BMP3      | BMP3      | -         |
| hsa-miR-132 | BNIP2     | BNIP2     | -         |
| hsa-miR-132 | BOLL      | BOLL      | -         |
| hsa-miR-132 | -         | BRAP      | BRAP      |
| hsa-miR-132 | BRCA1     | BRCA1     | -         |
| hsa-miR-132 | -         | BRI3      | BRI3      |
| hsa-miR-132 | BRWD1     | BRWD1     | -         |
| hsa-miR-132 | BTAF1     | BTAF1     | -         |
| hsa-miR-132 | BTBD7     | BTBD7     | -         |
| hsa-miR-132 | -         | C11orf65  | C11orf65  |
| hsa-miR-132 | C11orf87  | C11orf87  | -         |
| hsa-miR-132 | -         | C12orf26  | C12orf26  |
| hsa-miR-132 | -         | C12orf48  | C12orf48  |
| hsa-miR-132 | -         | C13orf18  | C13orf18  |
| hsa-miR-132 | C14orf147 | C14orf147 | -         |
| hsa-miR-132 | -         | C14orf148 | C14orf148 |
| hsa-miR-132 | -         | C14orf149 | C14orf149 |
| hsa-miR-132 | C14orf43  | C14orf43  | -         |
| hsa-miR-132 | -         | C16orf68  | C16orf68  |
| hsa-miR-132 | -         | C16orf70  | C16orf70  |
| hsa-miR-132 | -         | C18orf34  | C18orf34  |
| hsa-miR-132 | -         | C1QL1     | C1QL1     |
| hsa-miR-132 | -         | C1orf129  | C1orf129  |
| hsa-miR-132 | -         | C21orf119 | C21orf119 |
| hsa-miR-132 | C21orf91  | C21orf91  | -         |
| hsa-miR-132 | -         | C3orf62   | C3orf62   |
| hsa-miR-132 | C5orf13   | C5orf13   | -         |
| hsa-miR-132 | C7orf60   | C7orf60   | -         |
| hsa-miR-132 | -         | C8A       | C8A       |
| hsa-miR-132 | -         | C8orf47   | C8orf47   |
| hsa-miR-132 | -         | C9orf156  | C9orf156  |
| hsa-miR-132 | CALU      | CALU      | -         |
| hsa-miR-132 | CAMSAP1L1 | CAMSAP1L1 | -         |
| hsa-miR-132 | CAPRIN1   | CAPRIN1   | -         |
| hsa-miR-132 | CBFA2T2   | CBFA2T2   | -         |
| hsa-miR-132 | -         | CBWD1     | CBWD1     |
| hsa-miR-132 | -         | CBWD2     | CBWD2     |
| hsa-miR-132 | -         | CBWD3     | CBWD3     |
| hsa-miR-132 | -         | CBWD5     | CBWD5     |

|             |         |         |         |
|-------------|---------|---------|---------|
| hsa-miR-132 | -       | CBWD6   | CBWD6   |
| hsa-miR-132 | CCDC117 | CCDC117 | -       |
| hsa-miR-132 | -       | CCDC73  | CCDC73  |
| hsa-miR-132 | CCDC76  | CCDC76  | -       |
| hsa-miR-132 | CCDC88A | CCDC88A | -       |
| hsa-miR-132 | -       | CD300LF | CD300LF |
| hsa-miR-132 | -       | CD72    | CD72    |
| hsa-miR-132 | -       | CDC25B  | CDC25B  |
| hsa-miR-132 | CDC40   | CDC40   | -       |
| hsa-miR-132 | CDHR3   | CDHR3   | -       |
| hsa-miR-132 | CDK19   | CDK19   | -       |
| hsa-miR-132 | -       | CDKL4   | CDKL4   |
| hsa-miR-132 | CDKN1A  | CDKN1A  | -       |
| hsa-miR-132 | CELSR3  | CELSR3  | -       |
| hsa-miR-132 | -       | CENPO   | CENPO   |
| hsa-miR-132 | -       | CENPQ   | CENPQ   |
| hsa-miR-132 | -       | CEPT1   | CEPT1   |
| hsa-miR-132 | CFL2    | CFL2    | -       |
| hsa-miR-132 | CHD1    | CHD1    | -       |
| hsa-miR-132 | -       | CHGB    | CHGB    |
| hsa-miR-132 | CLASP2  | CLASP2  | -       |
| hsa-miR-132 | -       | CLP1    | CLP1    |
| hsa-miR-132 | -       | CMTM3   | CMTM3   |
| hsa-miR-132 | CNOT2   | CNOT2   | -       |
| hsa-miR-132 | COL5A2  | COL5A2  | -       |
| hsa-miR-132 | -       | COMMD10 | COMMD10 |
| hsa-miR-132 | -       | COMMD8  | COMMD8  |
| hsa-miR-132 | -       | CORO7   | CORO7   |
| hsa-miR-132 | -       | CPT1B   | CPT1B   |
| hsa-miR-132 | CREB5   | CREB5   | -       |
| hsa-miR-132 | -       | CRLS1   | CRLS1   |
| hsa-miR-132 | CSDE1   | CSDE1   | -       |
| hsa-miR-132 | -       | CSN1S1  | CSN1S1  |
| hsa-miR-132 | CSRNP3  | CSRNP3  | -       |
| hsa-miR-132 | -       | CTBP1   | CTBP1   |
| hsa-miR-132 | CTDSPL2 | CTDSPL2 | -       |
| hsa-miR-132 | CTGF    | CTGF    | -       |
| hsa-miR-132 | CWF19L1 | CWF19L1 | -       |
| hsa-miR-132 | CXorf1  | CXorf1  | -       |
| hsa-miR-132 | -       | CXorf26 | CXorf26 |
| hsa-miR-132 | -       | CXorf57 | CXorf57 |
| hsa-miR-132 | DAZAP2  | DAZAP2  | -       |
| hsa-miR-132 | DCAF8   | DCAF8   | -       |
| hsa-miR-132 | DCUN1D3 | DCUN1D3 | -       |
| hsa-miR-132 | DCUN1D4 | DCUN1D4 | -       |
| hsa-miR-132 | -       | DDX23   | DDX23   |
| hsa-miR-132 | -       | DEDD    | DEDD    |
| hsa-miR-132 | -       | DEPDC1  | DEPDC1  |
| hsa-miR-132 | DGCR8   | DGCR8   | -       |
| hsa-miR-132 | -       | DGKI    | DGKI    |
| hsa-miR-132 | -       | DNAH2   | DNAH2   |

|             |          |          |         |
|-------------|----------|----------|---------|
| hsa-miR-132 | DNAJA2   | DNAJA2   | -       |
| hsa-miR-132 | -        | DNTT     | DNTT    |
| hsa-miR-132 | DOK4     | DOK4     | -       |
| hsa-miR-132 | -        | DPYD     | DPYD    |
| hsa-miR-132 | DPYSL3   | DPYSL3   | -       |
| hsa-miR-132 | -        | DSCR6    | DSCR6   |
| hsa-miR-132 | DUSP9    | DUSP9    | -       |
| hsa-miR-132 | DYNC1LI2 | DYNC1LI2 | -       |
| hsa-miR-132 | DYRK2    | DYRK2    | -       |
| hsa-miR-132 | -        | ECT2     | ECT2    |
| hsa-miR-132 | -        | EFEMP2   | EFEMP2  |
| hsa-miR-132 | EGR1     | EGR1     | -       |
| hsa-miR-132 | EIF2C1   | EIF2C1   | -       |
| hsa-miR-132 | -        | EIF4A3   | EIF4A3  |
| hsa-miR-132 | -        | EMILIN2  | EMILIN2 |
| hsa-miR-132 | -        | ENPEP    | ENPEP   |
| hsa-miR-132 | EP300    | EP300    | -       |
| hsa-miR-132 | -        | EPHX2    | EPHX2   |
| hsa-miR-132 | ESRRG    | ESRRG    | -       |
| hsa-miR-132 | ETNK1    | ETNK1    | -       |
| hsa-miR-132 | ETV1     | ETV1     | -       |
| hsa-miR-132 | EXTL2    | EXTL2    | -       |
| hsa-miR-132 | FAM105B  | FAM105B  | -       |
| hsa-miR-132 | FAM167A  | FAM167A  | -       |
| hsa-miR-132 | -        | FAM54A   | FAM54A  |
| hsa-miR-132 | -        | FAM63A   | FAM63A  |
| hsa-miR-132 | FAM91A1  | FAM91A1  | -       |
| hsa-miR-132 | -        | FANK1    | FANK1   |
| hsa-miR-132 | -        | FARP2    | FARP2   |
| hsa-miR-132 | FAT2     | FAT2     | -       |
| hsa-miR-132 | FBXO21   | FBXO21   | -       |
| hsa-miR-132 | FBXO28   | FBXO28   | -       |
| hsa-miR-132 | -        | FBXO3    | FBXO3   |
| hsa-miR-132 | FBXW11   | FBXW11   | -       |
| hsa-miR-132 | FBXW7    | FBXW7    | -       |
| hsa-miR-132 | FEM1C    | FEM1C    | -       |
| hsa-miR-132 | -        | FGF14    | FGF14   |
| hsa-miR-132 | FGF7     | FGF7     | -       |
| hsa-miR-132 | -        | FGL1     | FGL1    |
| hsa-miR-132 | -        | FHL3     | FHL3    |
| hsa-miR-132 | FLJ36031 | FLJ36031 | -       |
| hsa-miR-132 | -        | FLOT1    | FLOT1   |
| hsa-miR-132 | -        | FOLR2    | FOLR2   |
| hsa-miR-132 | FOXO1    | FOXO1    | -       |
| hsa-miR-132 | FOXO3    | FOXO3    | -       |
| hsa-miR-132 | FRS2     | FRS2     | -       |
| hsa-miR-132 | -        | FTSJ2    | FTSJ2   |
| hsa-miR-132 | -        | FUCA2    | FUCA2   |
| hsa-miR-132 | -        | GAL3ST4  | GAL3ST4 |
| hsa-miR-132 | GATA2    | GATA2    | -       |
| hsa-miR-132 | -        | GBA      | GBA     |

|             |         |          |          |
|-------------|---------|----------|----------|
| hsa-miR-132 | -       | GBAS     | GBAS     |
| hsa-miR-132 | -       | GCNT4    | GCNT4    |
| hsa-miR-132 | -       | GHRL     | GHRL     |
| hsa-miR-132 | -       | GLI3     | GLI3     |
| hsa-miR-132 | -       | GMNN     | GMNN     |
| hsa-miR-132 | GNA12   | GNA12    | -        |
| hsa-miR-132 | GNB1    | GNB1     | -        |
| hsa-miR-132 | GOLM1   | GOLM1    | -        |
| hsa-miR-132 | GPD2    | GPD2     | -        |
| hsa-miR-132 | -       | GPR89A   | GPR89A   |
| hsa-miR-132 | -       | GPR89B   | GPR89B   |
| hsa-miR-132 | -       | GPRC5B   | GPRC5B   |
| hsa-miR-132 | GRASP   | -        | GRASP    |
| hsa-miR-132 | -       | GRHL3    | GRHL3    |
| hsa-miR-132 | GRSF1   | -        | GRSF1    |
| hsa-miR-132 | -       | GSK3A    | GSK3A    |
| hsa-miR-132 | -       | GTPBP2   | GTPBP2   |
| hsa-miR-132 | H3F3B   | H3F3B    | -        |
| hsa-miR-132 | HAO1    | HAO1     | -        |
| hsa-miR-132 | HAPLN1  | HAPLN1   | -        |
| hsa-miR-132 | -       | HAS2     | HAS2     |
| hsa-miR-132 | -       | HEXB     | HEXB     |
| hsa-miR-132 | HIP1R   | HIP1R    | -        |
| hsa-miR-132 | HMGA2   | HMGA2    | -        |
| hsa-miR-132 | HMGXB4  | HMGXB4   | -        |
| hsa-miR-132 | HN1     | HN1      | -        |
| hsa-miR-132 | HNRNPU  | HNRNPU   | -        |
| hsa-miR-132 | -       | HOMER1   | HOMER1   |
| hsa-miR-132 | -       | HOXB2    | HOXB2    |
| hsa-miR-132 | -       | HSD17B13 | HSD17B13 |
| hsa-miR-132 | -       | HSPH1    | HSPH1    |
| hsa-miR-132 | -       | IDH3B    | IDH3B    |
| hsa-miR-132 | -       | IER3IP1  | IER3IP1  |
| hsa-miR-132 | -       | IL1RL1   | IL1RL1   |
| hsa-miR-132 | -       | IL24     | IL24     |
| hsa-miR-132 | -       | IMPG1    | IMPG1    |
| hsa-miR-132 | -       | INHBB    | INHBB    |
| hsa-miR-132 | -       | IPO11    | IPO11    |
| hsa-miR-132 | IQSEC1  | IQSEC1   | -        |
| hsa-miR-132 | IRF1    | -        | IRF1     |
| hsa-miR-132 | ISL1    | ISL1     | -        |
| hsa-miR-132 | JOSD1   | JOSD1    | -        |
| hsa-miR-132 | KCMF1   | KCMF1    | -        |
| hsa-miR-132 | KCNA6   | KCNA6    | -        |
| hsa-miR-132 | KCNK2   | KCNK2    | -        |
| hsa-miR-132 | -       | KCTD14   | KCTD14   |
| hsa-miR-132 | -       | KDELC1   | KDELC1   |
| hsa-miR-132 | KDM5A   | KDM5A    | -        |
| hsa-miR-132 | KDM5B   | KDM5B    | -        |
| hsa-miR-132 | KDM5C   | KDM5C    | -        |
| hsa-miR-132 | KHDRBS2 | KHDRBS2  | -        |

|             |          |          |          |
|-------------|----------|----------|----------|
| hsa-miR-132 | -        | KHDRBS3  | KHDRBS3  |
| hsa-miR-132 | KIAA0240 | KIAA0240 | -        |
| hsa-miR-132 | -        | KIAA0586 | KIAA0586 |
| hsa-miR-132 | KIAA1211 | KIAA1211 | -        |
| hsa-miR-132 | KIAA1549 | KIAA1549 | -        |
| hsa-miR-132 | -        | KIAA2026 | KIAA2026 |
| hsa-miR-132 | KIF21B   | KIF21B   | -        |
| hsa-miR-132 | KITLG    | KITLG    | -        |
| hsa-miR-132 | KLHDC10  | KLHDC10  | -        |
| hsa-miR-132 | -        | KLHL32   | KLHL32   |
| hsa-miR-132 | -        | KLRG1    | KLRG1    |
| hsa-miR-132 | -        | KRT40    | KRT40    |
| hsa-miR-132 | -        | KRT83    | KRT83    |
| hsa-miR-132 | -        | KTN1     | KTN1     |
| hsa-miR-132 | -        | L3MBTL   | L3MBTL   |
| hsa-miR-132 | L3MBTL3  | L3MBTL3  | -        |
| hsa-miR-132 | -        | LAMC2    | LAMC2    |
| hsa-miR-132 | -        | LAPTM4B  | LAPTM4B  |
| hsa-miR-132 | LARGE    | LARGE    | -        |
| hsa-miR-132 | -        | LCK      | LCK      |
| hsa-miR-132 | -        | LIMS1    | LIMS1    |
| hsa-miR-132 | LIN28B   | LIN28B   | -        |
| hsa-miR-132 | -        | LOX      | LOX      |
| hsa-miR-132 | -        | LRRC8E   | LRRC8E   |
| hsa-miR-132 | -        | LSM1     | LSM1     |
| hsa-miR-132 | LSM11    | LSM11    | -        |
| hsa-miR-132 | -        | LTB      | LTB      |
| hsa-miR-132 | -        | LYN      | LYN      |
| hsa-miR-132 | MAF      | MAF      | -        |
| hsa-miR-132 | -        | MAGEB18  | MAGEB18  |
| hsa-miR-132 | -        | MAN1C1   | MAN1C1   |
| hsa-miR-132 | MAP3K3   | MAP3K3   | -        |
| hsa-miR-132 | -        | MAP3K8   | MAP3K8   |
| hsa-miR-132 | MAPK1    | MAPK1    | -        |
| hsa-miR-132 | MAPKAP1  | MAPKAP1  | -        |
| hsa-miR-132 | MAPKBP1  | MAPKBP1  | -        |
| hsa-miR-132 | MAPT     | MAPT     | -        |
| hsa-miR-132 | -        | MARVELD3 | MARVELD3 |
| hsa-miR-132 | MBP      | MBP      | -        |
| hsa-miR-132 | -        | MCOLN3   | MCOLN3   |
| hsa-miR-132 | MECOM    | MECOM    | -        |
| hsa-miR-132 | MED9     | MED9     | -        |
| hsa-miR-132 | MEF2A    | MEF2A    | -        |
| hsa-miR-132 | MEIS1    | MEIS1    | -        |
| hsa-miR-132 | -        | MELK     | MELK     |
| hsa-miR-132 | MEPCE    | MEPCE    | -        |
| hsa-miR-132 | -        | METAP1   | METAP1   |
| hsa-miR-132 | MEX3A    | MEX3A    | -        |
| hsa-miR-132 | MEX3C    | MEX3C    | -        |
| hsa-miR-132 | -        | MFAP1    | MFAP1    |
| hsa-miR-132 | -        | MFSD11   | MFSD11   |

|             |        |         |         |
|-------------|--------|---------|---------|
| hsa-miR-132 | -      | MGAM    | MGAM    |
| hsa-miR-132 | -      | MIER1   | MIER1   |
| hsa-miR-132 | -      | MIS12   | MIS12   |
| hsa-miR-132 | MITF   | MITF    | -       |
| hsa-miR-132 | -      | MLF1IP  | MLF1IP  |
| hsa-miR-132 | MMGT1  | MMGT1   | -       |
| hsa-miR-132 | MMP16  | MMP16   | -       |
| hsa-miR-132 | -      | MR1     | MR1     |
| hsa-miR-132 | -      | MRPL43  | MRPL43  |
| hsa-miR-132 | -      | MSH2    | MSH2    |
| hsa-miR-132 | -      | MTERFD3 | MTERFD3 |
| hsa-miR-132 | -      | MTMR1   | MTMR1   |
| hsa-miR-132 | MTMR10 | MTMR10  | -       |
| hsa-miR-132 | -      | MUC13   | MUC13   |
| hsa-miR-132 | -      | MX2     | MX2     |
| hsa-miR-132 | -      | MYO18B  | MYO18B  |
| hsa-miR-132 | -      | MYPN    | MYPN    |
| hsa-miR-132 | NAP1L1 | NAP1L1  | -       |
| hsa-miR-132 | -      | NAT10   | NAT10   |
| hsa-miR-132 | NCALD  | NCALD   | -       |
| hsa-miR-132 | -      | NCKAP1  | NCKAP1  |
| hsa-miR-132 | -      | NDUFA4  | NDUFA4  |
| hsa-miR-132 | -      | NDUFA5  | NDUFA5  |
| hsa-miR-132 | -      | NDUFB10 | NDUFB10 |
| hsa-miR-132 | -      | NDUFS4  | NDUFS4  |
| hsa-miR-132 | -      | NEIL2   | NEIL2   |
| hsa-miR-132 | NET1   | NET1    | -       |
| hsa-miR-132 | -      | NFE2L2  | NFE2L2  |
| hsa-miR-132 | NFIB   | -       | NFIB    |
| hsa-miR-132 | NFYA   | NFYA    | -       |
| hsa-miR-132 | -      | NMD3    | NMD3    |
| hsa-miR-132 | NMNAT2 | NMNAT2  | -       |
| hsa-miR-132 | NMT2   | NMT2    | -       |
| hsa-miR-132 | -      | NOS1    | NOS1    |
| hsa-miR-132 | -      | NOV     | NOV     |
| hsa-miR-132 | NOVA1  | NOVA1   | -       |
| hsa-miR-132 | NRCAM  | NRCAM   | -       |
| hsa-miR-132 | -      | NTF3    | NTF3    |
| hsa-miR-132 | -      | NUDCD3  | NUDCD3  |
| hsa-miR-132 | -      | NVL     | NVL     |
| hsa-miR-132 | -      | ORC6L   | ORC6L   |
| hsa-miR-132 | OSBPL8 | OSBPL8  | -       |
| hsa-miR-132 | OTUD3  | OTUD3   | -       |
| hsa-miR-132 | -      | OTUD4   | OTUD4   |
| hsa-miR-132 | -      | PACRG   | PACRG   |
| hsa-miR-132 | PALM2  | PALM2   | -       |
| hsa-miR-132 | PAM    | PAM     | -       |
| hsa-miR-132 | PAN3   | -       | PAN3    |
| hsa-miR-132 | -      | PANX1   | PANX1   |
| hsa-miR-132 | -      | PAPD5   | PAPD5   |
| hsa-miR-132 | PAPOLA | PAPOLA  | -       |



|             |         |         |         |
|-------------|---------|---------|---------|
| hsa-miR-132 | PCDH10  | PCDH10  | -       |
| hsa-miR-132 | -       | PCDH15  | PCDH15  |
| hsa-miR-132 | -       | PCDHB6  | PCDHB6  |
| hsa-miR-132 | PCGF3   | PCGF3   | -       |
| hsa-miR-132 | -       | PCNT    | PCNT    |
| hsa-miR-132 | -       | PDE1C   | PDE1C   |
| hsa-miR-132 | PDE5A   | PDE5A   | -       |
| hsa-miR-132 | PDE7A   | PDE7A   | -       |
| hsa-miR-132 | PDE7B   | PDE7B   | -       |
| hsa-miR-132 | -       | PDSS1   | PDSS1   |
| hsa-miR-132 | -       | PDZK1   | PDZK1   |
| hsa-miR-132 | PFN2    | PFN2    | -       |
| hsa-miR-132 | -       | PGA3    | PGA3    |
| hsa-miR-132 | -       | PGA4    | PGA4    |
| hsa-miR-132 | -       | PGA5    | PGA5    |
| hsa-miR-132 | -       | PHF12   | PHF12   |
| hsa-miR-132 | -       | PHF17   | PHF17   |
| hsa-miR-132 | PHF20L1 | PHF20L1 | -       |
| hsa-miR-132 | -       | PHKB    | PHKB    |
| hsa-miR-132 | -       | PIGS    | PIGS    |
| hsa-miR-132 | -       | PIGY    | PIGY    |
| hsa-miR-132 | -       | PIK3AP1 | PIK3AP1 |
| hsa-miR-132 | -       | PIK3CA  | PIK3CA  |
| hsa-miR-132 | PIK3R3  | PIK3R3  | -       |
| hsa-miR-132 | -       | PKD1L1  | PKD1L1  |
| hsa-miR-132 | -       | PKN3    | PKN3    |
| hsa-miR-132 | -       | PML     | PML     |
| hsa-miR-132 | -       | PMPCB   | PMPCB   |
| hsa-miR-132 | -       | PNKD    | PNKD    |
| hsa-miR-132 | -       | PNN     | PNN     |
| hsa-miR-132 | -       | PNRC1   | PNRC1   |
| hsa-miR-132 | -       | PNRC2   | PNRC2   |
| hsa-miR-132 | POM121C | POM121C | -       |
| hsa-miR-132 | -       | PPIL5   | PPIL5   |
| hsa-miR-132 | -       | PPM1G   | PPM1G   |
| hsa-miR-132 | PPP2R5C | PPP2R5C | -       |
| hsa-miR-132 | PPP2R5E | PPP2R5E | -       |
| hsa-miR-132 | PPPDE1  | PPPDE1  | -       |
| hsa-miR-132 | -       | PPRC1   | PPRC1   |
| hsa-miR-132 | -       | PRAME   | PRAME   |
| hsa-miR-132 | -       | PRKAG2  | PRKAG2  |
| hsa-miR-132 | PRKD1   | PRKD1   | -       |
| hsa-miR-132 | -       | PRPF4B  | PRPF4B  |
| hsa-miR-132 | -       | PRRG1   | PRRG1   |
| hsa-miR-132 | PSMA2   | PSMA2   | -       |
| hsa-miR-132 | -       | PSMD1   | PSMD1   |
| hsa-miR-132 | -       | PSMD13  | PSMD13  |
| hsa-miR-132 | PTBP2   | PTBP2   | -       |
| hsa-miR-132 | PTCH1   | -       | PTCH1   |
| hsa-miR-132 | -       | PTCHD3  | PTCHD3  |
| hsa-miR-132 | -       | PTPN12  | PTPN12  |

|             |           |           |          |
|-------------|-----------|-----------|----------|
| hsa-miR-132 | -         | PTPN4     | PTPN4    |
| hsa-miR-132 | -         | PTPRF     | PTPRF    |
| hsa-miR-132 | -         | PTRH1     | PTRH1    |
| hsa-miR-132 | -         | PUM2      | PUM2     |
| hsa-miR-132 | PXN       | PXN       | -        |
| hsa-miR-132 | ProSAPiP1 | ProSAPiP1 | -        |
| hsa-miR-132 | -         | QDPR      | QDPR     |
| hsa-miR-132 | RAB1A     | RAB1A     | -        |
| hsa-miR-132 | -         | RAB25     | RAB25    |
| hsa-miR-132 | -         | RAB28     | RAB28    |
| hsa-miR-132 | -         | RAB34     | RAB34    |
| hsa-miR-132 | RAB6B     | RAB6B     | -        |
| hsa-miR-132 | RAP2B     | RAP2B     | -        |
| hsa-miR-132 | RAPH1     | -         | RAPH1    |
| hsa-miR-132 | RB1       | RB1       | -        |
| hsa-miR-132 | RBM12     | RBM12     | -        |
| hsa-miR-132 | -         | RBM14     | RBM14    |
| hsa-miR-132 | -         | REPS2     | REPS2    |
| hsa-miR-132 | RFX3      | RFX3      | -        |
| hsa-miR-132 | RGS7BP    | RGS7BP    | -        |
| hsa-miR-132 | -         | RNASEH2B  | RNASEH2B |
| hsa-miR-132 | -         | RNASEN    | RNASEN   |
| hsa-miR-132 | RNF24     | RNF24     | -        |
| hsa-miR-132 | -         | RPH3A     | RPH3A    |
| hsa-miR-132 | -         | RRS1      | RRS1     |
| hsa-miR-132 | -         | RSU1      | RSU1     |
| hsa-miR-132 | RTF1      | RTF1      | -        |
| hsa-miR-132 | -         | RTN1      | RTN1     |
| hsa-miR-132 | -         | RUFY2     | RUFY2    |
| hsa-miR-132 | -         | S100A2    | S100A2   |
| hsa-miR-132 | SALL1     | SALL1     | -        |
| hsa-miR-132 | SALL3     | SALL3     | -        |
| hsa-miR-132 | SAMD12    | SAMD12    | -        |
| hsa-miR-132 | -         | SART3     | SART3    |
| hsa-miR-132 | -         | SCCPDH    | SCCPDH   |
| hsa-miR-132 | SCN1A     | SCN1A     | -        |
| hsa-miR-132 | -         | SCNN1B    | SCNN1B   |
| hsa-miR-132 | -         | SCYL3     | SCYL3    |
| hsa-miR-132 | -         | SDCBP     | SDCBP    |
| hsa-miR-132 | -         | SDF2      | SDF2     |
| hsa-miR-132 | SEC16A    | SEC16A    | -        |
| hsa-miR-132 | SEMA4G    | SEMA4G    | -        |
| hsa-miR-132 | SEMA6A    | SEMA6A    | -        |
| hsa-miR-132 | -         | SENP2     | SENP2    |
| hsa-miR-132 | SERP1     | SERP1     | -        |
| hsa-miR-132 | SETD5     | SETD5     | -        |
| hsa-miR-132 | -         | SFMBT1    | SFMBT1   |
| hsa-miR-132 | SGK3      | SGK3      | -        |
| hsa-miR-132 | SHANK2    | SHANK2    | -        |
| hsa-miR-132 | -         | SHOX      | SHOX     |
| hsa-miR-132 | -         | SIT1      | SIT1     |

|             |         |          |          |
|-------------|---------|----------|----------|
| hsa-miR-132 | SIX4    | SIX4     | -        |
| hsa-miR-132 | -       | SLBP     | SLBP     |
| hsa-miR-132 | -       | SLC10A4  | SLC10A4  |
| hsa-miR-132 | -       | SLC17A8  | SLC17A8  |
| hsa-miR-132 | -       | SLC20A1  | SLC20A1  |
| hsa-miR-132 | -       | SLC25A20 | SLC25A20 |
| hsa-miR-132 | -       | SLC25A25 | SLC25A25 |
| hsa-miR-132 | SLC26A7 | SLC26A7  | -        |
| hsa-miR-132 | SLC30A6 | SLC30A6  | -        |
| hsa-miR-132 | SLC31A1 | SLC31A1  | -        |
| hsa-miR-132 | -       | SLC35A1  | SLC35A1  |
| hsa-miR-132 | -       | SLC35B3  | SLC35B3  |
| hsa-miR-132 | -       | SLC35D2  | SLC35D2  |
| hsa-miR-132 | SLC6A1  | SLC6A1   | -        |
| hsa-miR-132 | SLC6A3  | SLC6A3   | -        |
| hsa-miR-132 | -       | SLC9A10  | SLC9A10  |
| hsa-miR-132 | SMAD5   | SMAD5    | -        |
| hsa-miR-132 | -       | SMARCA4  | SMARCA4  |
| hsa-miR-132 | -       | SMOC2    | SMOC2    |
| hsa-miR-132 | -       | SMTN     | SMTN     |
| hsa-miR-132 | -       | SNCAIP   | SNCAIP   |
| hsa-miR-132 | -       | SNX7     | SNX7     |
| hsa-miR-132 | -       | SOD2     | SOD2     |
| hsa-miR-132 | -       | SOX10    | SOX10    |
| hsa-miR-132 | -       | SOX3     | SOX3     |
| hsa-miR-132 | SOX4    | SOX4     | -        |
| hsa-miR-132 | SOX5    | SOX5     | -        |
| hsa-miR-132 | SOX6    | SOX6     | -        |
| hsa-miR-132 | -       | SP110    | SP110    |
| hsa-miR-132 | SP8     | SP8      | -        |
| hsa-miR-132 | -       | SPATS1   | SPATS1   |
| hsa-miR-132 | SPIN1   | SPIN1    | -        |
| hsa-miR-132 | SPPL3   | SPPL3    | -        |
| hsa-miR-132 | SPRED1  | SPRED1   | -        |
| hsa-miR-132 | -       | SRCRB4D  | SRCRB4D  |
| hsa-miR-132 | -       | SRFBP1   | SRFBP1   |
| hsa-miR-132 | SRGAP1  | SRGAP1   | -        |
| hsa-miR-132 | SRGAP2  | SRGAP2   | -        |
| hsa-miR-132 | -       | SRP72    | SRP72    |
| hsa-miR-132 | SS18    | SS18     | -        |
| hsa-miR-132 | -       | STAT4    | STAT4    |
| hsa-miR-132 | -       | STIM2    | STIM2    |
| hsa-miR-132 | -       | STK16    | STK16    |
| hsa-miR-132 | -       | STK39    | STK39    |
| hsa-miR-132 | -       | SUCLA2   | SUCLA2   |
| hsa-miR-132 | -       | SUPT4H1  | SUPT4H1  |
| hsa-miR-132 | -       | SURF6    | SURF6    |
| hsa-miR-132 | SV2A    | SV2A     | -        |
| hsa-miR-132 | -       | SYNE2    | SYNE2    |
| hsa-miR-132 | -       | SYTL4    | SYTL4    |
| hsa-miR-132 | TADA2B  | TADA2B   | -        |

|             |          |          |         |
|-------------|----------|----------|---------|
| hsa-miR-132 | -        | TAF15    | TAF15   |
| hsa-miR-132 | TAF4B    | TAF4B    | -       |
| hsa-miR-132 | -        | TBC1D8   | TBC1D8  |
| hsa-miR-132 | TCEB1    | TCEB1    | -       |
| hsa-miR-132 | TCF7L2   | TCF7L2   | -       |
| hsa-miR-132 | -        | TEX11    | TEX11   |
| hsa-miR-132 | -        | TGFBI    | TGFBI   |
| hsa-miR-132 | -        | TGM3     | TGM3    |
| hsa-miR-132 | -        | THOC2    | THOC2   |
| hsa-miR-132 | -        | THSD4    | THSD4   |
| hsa-miR-132 | -        | TMEFF1   | TMEFF1  |
| hsa-miR-132 | TMEM106B | TMEM106B | -       |
| hsa-miR-132 | -        | TMEM136  | TMEM136 |
| hsa-miR-132 | TMEM185B | TMEM185B | -       |
| hsa-miR-132 | -        | TMEM39B  | TMEM39B |
| hsa-miR-132 | TMEM43   | TMEM43   | -       |
| hsa-miR-132 | -        | TMEM50B  | TMEM50B |
| hsa-miR-132 | -        | TMEM87A  | TMEM87A |
| hsa-miR-132 | -        | TPO      | TPO     |
| hsa-miR-132 | -        | TRIB1    | TRIB1   |
| hsa-miR-132 | -        | TRIM44   | TRIM44  |
| hsa-miR-132 | TSC22D3  | TSC22D3  | -       |
| hsa-miR-132 | -        | TSHZ3    | TSHZ3   |
| hsa-miR-132 | -        | TSPAN16  | TSPAN16 |
| hsa-miR-132 | TUSC3    | TUSC3    | -       |
| hsa-miR-132 | -        | TXNL1    | TXNL1   |
| hsa-miR-132 | -        | UBAC2    | UBAC2   |
| hsa-miR-132 | -        | UBE2E2   | UBE2E2  |
| hsa-miR-132 | UBN1     | UBN1     | -       |
| hsa-miR-132 | -        | UFD1L    | UFD1L   |
| hsa-miR-132 | -        | UPK1B    | UPK1B   |
| hsa-miR-132 | USP9Y    | USP9Y    | -       |
| hsa-miR-132 | -        | VCAM1    | VCAM1   |
| hsa-miR-132 | -        | VDAC2    | VDAC2   |
| hsa-miR-132 | -        | VEZT     | VEZT    |
| hsa-miR-132 | VPS41    | VPS41    | -       |
| hsa-miR-132 | -        | WDR19    | WDR19   |
| hsa-miR-132 | -        | WDR43    | WDR43   |
| hsa-miR-132 | -        | WDR48    | WDR48   |
| hsa-miR-132 | -        | YAP1     | YAP1    |
| hsa-miR-132 | -        | YIF1A    | YIF1A   |
| hsa-miR-132 | -        | YLPM1    | YLPM1   |
| hsa-miR-132 | -        | YWHAB    | YWHAB   |
| hsa-miR-132 | YWHAG    | YWHAG    | -       |
| hsa-miR-132 | -        | ZBTB17   | ZBTB17  |
| hsa-miR-132 | ZBTB34   | ZBTB34   | -       |
| hsa-miR-132 | -        | ZC3H8    | ZC3H8   |
| hsa-miR-132 | ZEB2     | ZEB2     | -       |
| hsa-miR-132 | ZFC3H1   | ZFC3H1   | -       |
| hsa-miR-132 | ZFHX4    | ZFHX4    | -       |
| hsa-miR-132 | -        | ZKSCAN5  | ZKSCAN5 |

|             |           |           |           |
|-------------|-----------|-----------|-----------|
| hsa-miR-132 | -         | ZMYND8    | ZMYND8    |
| hsa-miR-132 | -         | ZNF133    | ZNF133    |
| hsa-miR-132 | ZNF236    | ZNF236    | -         |
| hsa-miR-132 | ZNF292    | ZNF292    | -         |
| hsa-miR-132 | -         | ZNF330    | ZNF330    |
| hsa-miR-132 | ZNF395    | ZNF395    | -         |
| hsa-miR-132 | -         | ZNF695    | ZNF695    |
| hsa-miR-132 | ZSWIM6    | ZSWIM6    | -         |
| hsa-miR-134 | -         | ABCD1     | ABCD1     |
| hsa-miR-134 | -         | ABI3      | ABI3      |
| hsa-miR-134 | -         | ABT1      | ABT1      |
| hsa-miR-134 | -         | ACACA     | ACACA     |
| hsa-miR-134 | -         | ACOT7     | ACOT7     |
| hsa-miR-134 | -         | ACTG2     | ACTG2     |
| hsa-miR-134 | -         | ADH5      | ADH5      |
| hsa-miR-134 | -         | ADORA2A   | ADORA2A   |
| hsa-miR-134 | -         | ADSSL1    | ADSSL1    |
| hsa-miR-134 | -         | AEBP1     | AEBP1     |
| hsa-miR-134 | AFF3      | AFF3      | -         |
| hsa-miR-134 | -         | ALDH3B2   | ALDH3B2   |
| hsa-miR-134 | -         | AMPH      | AMPH      |
| hsa-miR-134 | ANKRD55   | ANKRD55   | -         |
| hsa-miR-134 | -         | ARHGAP30  | ARHGAP30  |
| hsa-miR-134 | -         | ARID1B    | ARID1B    |
| hsa-miR-134 | -         | ARMCX2    | ARMCX2    |
| hsa-miR-134 | -         | ARV1      | ARV1      |
| hsa-miR-134 | -         | ASMTL     | ASMTL     |
| hsa-miR-134 | -         | ATIC      | ATIC      |
| hsa-miR-134 | -         | ATP10B    | ATP10B    |
| hsa-miR-134 | ATP2B2    | -         | ATP2B2    |
| hsa-miR-134 | AWAT1     | AWAT1     | -         |
| hsa-miR-134 | B3GNT9    | B3GNT9    | -         |
| hsa-miR-134 | BAGE2     | BAGE2     | -         |
| hsa-miR-134 | BAGE5     | BAGE5     | -         |
| hsa-miR-134 | -         | BANF1     | BANF1     |
| hsa-miR-134 | BDNF      | BDNF      | -         |
| hsa-miR-134 | -         | BEST1     | BEST1     |
| hsa-miR-134 | -         | BLMH      | BLMH      |
| hsa-miR-134 | -         | BLZF1     | BLZF1     |
| hsa-miR-134 | -         | BMP2K     | BMP2K     |
| hsa-miR-134 | BNC2      | BNC2      | -         |
| hsa-miR-134 | -         | BOLA3     | BOLA3     |
| hsa-miR-134 | -         | C10orf99  | C10orf99  |
| hsa-miR-134 | -         | C11orf41  | C11orf41  |
| hsa-miR-134 | -         | C11orf58  | C11orf58  |
| hsa-miR-134 | -         | C12orf41  | C12orf41  |
| hsa-miR-134 | -         | C12orf51  | C12orf51  |
| hsa-miR-134 | C14orf101 | C14orf101 | -         |
| hsa-miR-134 | -         | C14orf109 | C14orf109 |
| hsa-miR-134 | C14orf126 | C14orf126 | -         |
| hsa-miR-134 | -         | C14orf145 | C14orf145 |

|             |          |          |          |
|-------------|----------|----------|----------|
| hsa-miR-134 | -        | C16orf48 | C16orf48 |
| hsa-miR-134 | -        | C17orf85 | C17orf85 |
| hsa-miR-134 | C18orf34 | C18orf34 | -        |
| hsa-miR-134 | -        | C19orf53 | C19orf53 |
| hsa-miR-134 | -        | C19orf55 | C19orf55 |
| hsa-miR-134 | -        | C1orf115 | C1orf115 |
| hsa-miR-134 | -        | C1orf163 | C1orf163 |
| hsa-miR-134 | C1orf212 | C1orf212 | -        |
| hsa-miR-134 | C7orf42  | C7orf42  | -        |
| hsa-miR-134 | C8orf83  | C8orf83  | -        |
| hsa-miR-134 | -        | C9orf117 | C9orf117 |
| hsa-miR-134 | -        | C9orf21  | C9orf21  |
| hsa-miR-134 | -        | C9orf5   | C9orf5   |
| hsa-miR-134 | -        | CA7      | CA7      |
| hsa-miR-134 | -        | CACNA1D  | CACNA1D  |
| hsa-miR-134 | CALCOCO2 | CALCOCO2 | -        |
| hsa-miR-134 | -        | CAPNS1   | CAPNS1   |
| hsa-miR-134 | -        | CARS     | CARS     |
| hsa-miR-134 | -        | CCDC107  | CCDC107  |
| hsa-miR-134 | -        | CCDC40   | CCDC40   |
| hsa-miR-134 | -        | CCDC77   | CCDC77   |
| hsa-miR-134 | -        | CCL14    | CCL14    |
| hsa-miR-134 | -        | CCNC     | CCNC     |
| hsa-miR-134 | -        | CD53     | CD53     |
| hsa-miR-134 | -        | CDC20B   | CDC20B   |
| hsa-miR-134 | -        | CDH9     | CDH9     |
| hsa-miR-134 | -        | CDKN2A   | CDKN2A   |
| hsa-miR-134 | -        | CECR2    | CECR2    |
| hsa-miR-134 | CELF2    | CELF2    | -        |
| hsa-miR-134 | -        | CHEK2    | CHEK2    |
| hsa-miR-134 | -        | CHST4    | CHST4    |
| hsa-miR-134 | -        | CIB2     | CIB2     |
| hsa-miR-134 | CISD1    | CISD1    | -        |
| hsa-miR-134 | CISD3    | CISD3    | -        |
| hsa-miR-134 | -        | CLASP1   | CLASP1   |
| hsa-miR-134 | -        | CNTD2    | CNTD2    |
| hsa-miR-134 | -        | CNTNAP3B | CNTNAP3B |
| hsa-miR-134 | -        | COL23A1  | COL23A1  |
| hsa-miR-134 | -        | COL2A1   | COL2A1   |
| hsa-miR-134 | -        | COLEC10  | COLEC10  |
| hsa-miR-134 | -        | COPA     | COPA     |
| hsa-miR-134 | -        | COPS6    | COPS6    |
| hsa-miR-134 | -        | COX8A    | COX8A    |
| hsa-miR-134 | CPEB2    | CPEB2    | -        |
| hsa-miR-134 | CPS1     | CPS1     | -        |
| hsa-miR-134 | CPSF6    | CPSF6    | -        |
| hsa-miR-134 | -        | CRABP2   | CRABP2   |
| hsa-miR-134 | CREB1    | CREB1    | -        |
| hsa-miR-134 | -        | CRTAC1   | CRTAC1   |
| hsa-miR-134 | -        | CRTC3    | CRTC3    |
| hsa-miR-134 | -        | CRY1     | CRY1     |

|             |           |           |         |
|-------------|-----------|-----------|---------|
| hsa-miR-134 | -         | CSF3R     | CSF3R   |
| hsa-miR-134 | -         | CST4      | CST4    |
| hsa-miR-134 | -         | CTHRC1    | CTHRC1  |
| hsa-miR-134 | -         | CTNNA1    | CTNNA1  |
| hsa-miR-134 | CTTNBP2NL | CTTNBP2NL | -       |
| hsa-miR-134 | -         | CUTC      | CUTC    |
| hsa-miR-134 | -         | CXorf36   | CXorf36 |
| hsa-miR-134 | -         | DAB2      | DAB2    |
| hsa-miR-134 | -         | DCBLD1    | DCBLD1  |
| hsa-miR-134 | -         | DEFB129   | DEFB129 |
| hsa-miR-134 | DNAJC18   | DNAJC18   | -       |
| hsa-miR-134 | -         | DNM1      | DNM1    |
| hsa-miR-134 | -         | DOK7      | DOK7    |
| hsa-miR-134 | DPH2      | DPH2      | -       |
| hsa-miR-134 | -         | DRD5      | DRD5    |
| hsa-miR-134 | -         | DSG2      | DSG2    |
| hsa-miR-134 | -         | DUOX1     | DUOX1   |
| hsa-miR-134 | -         | DUSP4     | DUSP4   |
| hsa-miR-134 | -         | EDN3      | EDN3    |
| hsa-miR-134 | -         | EGF       | EGF     |
| hsa-miR-134 | -         | EGLN1     | EGLN1   |
| hsa-miR-134 | -         | EIF1      | EIF1    |
| hsa-miR-134 | EPB41L5   | EPB41L5   | -       |
| hsa-miR-134 | -         | ESAM      | ESAM    |
| hsa-miR-134 | -         | ESF1      | ESF1    |
| hsa-miR-134 | -         | ETFDH     | ETFDH   |
| hsa-miR-134 | EXD1      | EXD1      | -       |
| hsa-miR-134 | -         | F8A3      | F8A3    |
| hsa-miR-134 | -         | FAM106A   | FAM106A |
| hsa-miR-134 | FAM168B   | FAM168B   | -       |
| hsa-miR-134 | -         | FAM50B    | FAM50B  |
| hsa-miR-134 | -         | FAM57A    | FAM57A  |
| hsa-miR-134 | -         | FAM75A2   | FAM75A2 |
| hsa-miR-134 | -         | FAM75A3   | FAM75A3 |
| hsa-miR-134 | -         | FAM75A6   | FAM75A6 |
| hsa-miR-134 | -         | FAM83F    | FAM83F  |
| hsa-miR-134 | FAM91A1   | FAM91A1   | -       |
| hsa-miR-134 | -         | FASTK     | FASTK   |
| hsa-miR-134 | -         | FBXO17    | FBXO17  |
| hsa-miR-134 | -         | FKBP15    | FKBP15  |
| hsa-miR-134 | -         | FOXH1     | FOXH1   |
| hsa-miR-134 | FOXP2     | FOXP2     | -       |
| hsa-miR-134 | FRMPD4    | FRMPD4    | -       |
| hsa-miR-134 | -         | GABBR1    | GABBR1  |
| hsa-miR-134 | -         | GABRB2    | GABRB2  |
| hsa-miR-134 | -         | GJA4      | GJA4    |
| hsa-miR-134 | GOSR2     | GOSR2     | -       |
| hsa-miR-134 | -         | GPR45     | GPR45   |
| hsa-miR-134 | -         | GPSM1     | GPSM1   |
| hsa-miR-134 | -         | GPX5      | GPX5    |
| hsa-miR-134 | -         | GSG1      | GSG1    |

|             |        |          |          |
|-------------|--------|----------|----------|
| hsa-miR-134 | -      | GSG2     | GSG2     |
| hsa-miR-134 | -      | GSK3B    | GSK3B    |
| hsa-miR-134 | GTDC1  | GTDC1    | -        |
| hsa-miR-134 | -      | GYG1     | GYG1     |
| hsa-miR-134 | HABP4  | HABP4    | -        |
| hsa-miR-134 | HDAC5  | HDAC5    | -        |
| hsa-miR-134 | -      | HLA-DOB  | HLA-DOB  |
| hsa-miR-134 | -      | HMGCL    | HMGCL    |
| hsa-miR-134 | -      | HNF4A    | HNF4A    |
| hsa-miR-134 | HNMT   | HNMT     | -        |
| hsa-miR-134 | -      | HORMAD2  | HORMAD2  |
| hsa-miR-134 | -      | HPSE2    | HPSE2    |
| hsa-miR-134 | -      | HS3ST3A1 | HS3ST3A1 |
| hsa-miR-134 | -      | ICT1     | ICT1     |
| hsa-miR-134 | IDH3A  | IDH3A    | -        |
| hsa-miR-134 | -      | IER3IP1  | IER3IP1  |
| hsa-miR-134 | -      | IKBKG    | IKBKG    |
| hsa-miR-134 | -      | IL28A    | IL28A    |
| hsa-miR-134 | ILDR2  | ILDR2    | -        |
| hsa-miR-134 | -      | ITGA9    | ITGA9    |
| hsa-miR-134 | -      | ITSN1    | ITSN1    |
| hsa-miR-134 | -      | KCNK12   | KCNK12   |
| hsa-miR-134 | -      | KCNK15   | KCNK15   |
| hsa-miR-134 | KCNMB3 | KCNMB3   | -        |
| hsa-miR-134 | KDM6A  | KDM6A    | -        |
| hsa-miR-134 | -      | KIAA1529 | KIAA1529 |
| hsa-miR-134 | -      | KLC2     | KLC2     |
| hsa-miR-134 | KLHL14 | KLHL14   | -        |
| hsa-miR-134 | KPNA3  | KPNA3    | -        |
| hsa-miR-134 | -      | KPNA5    | KPNA5    |
| hsa-miR-134 | -      | KRBA2    | KRBA2    |
| hsa-miR-134 | -      | KREMEN1  | KREMEN1  |
| hsa-miR-134 | -      | KRT12    | KRT12    |
| hsa-miR-134 | -      | KRT74    | KRT74    |
| hsa-miR-134 | -      | KRT75    | KRT75    |
| hsa-miR-134 | -      | KRTAP4-5 | KRTAP4-5 |
| hsa-miR-134 | -      | LEAP2    | LEAP2    |
| hsa-miR-134 | -      | LIN7A    | LIN7A    |
| hsa-miR-134 | LMLN   | LMLN     | -        |
| hsa-miR-134 | LMOD1  | LMOD1    | -        |
| hsa-miR-134 | -      | LTB      | LTB      |
| hsa-miR-134 | -      | MAEL     | MAEL     |
| hsa-miR-134 | -      | MAGEA1   | MAGEA1   |
| hsa-miR-134 | -      | MAGEB3   | MAGEB3   |
| hsa-miR-134 | MAGI2  | MAGI2    | -        |
| hsa-miR-134 | MAGIX  | MAGIX    | -        |
| hsa-miR-134 | MED13  | MED13    | -        |
| hsa-miR-134 | MEIS2  | MEIS2    | -        |
| hsa-miR-134 | -      | MEPE     | MEPE     |
| hsa-miR-134 | MFAP3L | MFAP3L   | -        |
| hsa-miR-134 | -      | MGST3    | MGST3    |



|             |          |          |          |
|-------------|----------|----------|----------|
| hsa-miR-134 | -        | MIOX     | MIOX     |
| hsa-miR-134 | MLL2     | MLL2     | -        |
| hsa-miR-134 | -        | MLLT10   | MLLT10   |
| hsa-miR-134 | -        | MLPH     | MLPH     |
| hsa-miR-134 | -        | MOCS1    | MOCS1    |
| hsa-miR-134 | -        | MPHOSPH6 | MPHOSPH6 |
| hsa-miR-134 | MRFAP1   | MRFAP1   | -        |
| hsa-miR-134 | -        | MRPL18   | MRPL18   |
| hsa-miR-134 | -        | MRPL3    | MRPL3    |
| hsa-miR-134 | MRS2     | MRS2     | -        |
| hsa-miR-134 | -        | MSI2     | MSI2     |
| hsa-miR-134 | -        | MYB      | MYB      |
| hsa-miR-134 | -        | MYBPC3   | MYBPC3   |
| hsa-miR-134 | -        | MYH15    | MYH15    |
| hsa-miR-134 | -        | MYH7B    | MYH7B    |
| hsa-miR-134 | -        | MYO5C    | MYO5C    |
| hsa-miR-134 | -        | MYST4    | MYST4    |
| hsa-miR-134 | -        | NANOS2   | NANOS2   |
| hsa-miR-134 | NDFIP2   | NDFIP2   | -        |
| hsa-miR-134 | -        | NFU1     | NFU1     |
| hsa-miR-134 | NHS      | NHS      | -        |
| hsa-miR-134 | NIPA1    | NIPA1    | -        |
| hsa-miR-134 | -        | NOX1     | NOX1     |
| hsa-miR-134 | -        | NRF1     | NRF1     |
| hsa-miR-134 | -        | NSDHL    | NSDHL    |
| hsa-miR-134 | -        | NUMB     | NUMB     |
| hsa-miR-134 | -        | NUP214   | NUP214   |
| hsa-miR-134 | ODZ2     | ODZ2     | -        |
| hsa-miR-134 | PAN3     | PAN3     | -        |
| hsa-miR-134 | -        | PAPSS1   | PAPSS1   |
| hsa-miR-134 | -        | PDE6G    | PDE6G    |
| hsa-miR-134 | -        | PGM3     | PGM3     |
| hsa-miR-134 | -        | PHF15    | PHF15    |
| hsa-miR-134 | PHF8     | -        | PHF8     |
| hsa-miR-134 | -        | PHLDA2   | PHLDA2   |
| hsa-miR-134 | PHLPP2   | PHLPP2   | -        |
| hsa-miR-134 | -        | PIK3C2A  | PIK3C2A  |
| hsa-miR-134 | -        | PKP3     | PKP3     |
| hsa-miR-134 | -        | PLCH1    | PLCH1    |
| hsa-miR-134 | POLR3H   | POLR3H   | -        |
| hsa-miR-134 | PPP1R12A | PPP1R12A | -        |
| hsa-miR-134 | -        | PRF1     | PRF1     |
| hsa-miR-134 | -        | PRKCDBP  | PRKCDBP  |
| hsa-miR-134 | -        | PROP1    | PROP1    |
| hsa-miR-134 | -        | PSEN2    | PSEN2    |
| hsa-miR-134 | RAB27A   | RAB27A   | -        |
| hsa-miR-134 | -        | RAB2B    | RAB2B    |
| hsa-miR-134 | RABEP1   | RABEP1   | -        |
| hsa-miR-134 | RAN      | RAN      | -        |
| hsa-miR-134 | -        | RANBP3   | RANBP3   |
| hsa-miR-134 | -        | RARRES1  | RARRES1  |

|             |         |          |          |
|-------------|---------|----------|----------|
| hsa-miR-134 | -       | REPS1    | REPS1    |
| hsa-miR-134 | -       | REXO4    | REXO4    |
| hsa-miR-134 | -       | RFC5     | RFC5     |
| hsa-miR-134 | -       | RHCG     | RHCG     |
| hsa-miR-134 | RHOQ    | RHOQ     | -        |
| hsa-miR-134 | -       | RIOK1    | RIOK1    |
| hsa-miR-134 | -       | RND2     | RND2     |
| hsa-miR-134 | -       | RNF103   | RNF103   |
| hsa-miR-134 | -       | RNF113B  | RNF113B  |
| hsa-miR-134 | RNF185  | RNF185   | -        |
| hsa-miR-134 | -       | RPGR     | RPGR     |
| hsa-miR-134 | -       | RRH      | RRH      |
| hsa-miR-134 | -       | SAE1     | SAE1     |
| hsa-miR-134 | -       | SARS2    | SARS2    |
| hsa-miR-134 | -       | SCN9A    | SCN9A    |
| hsa-miR-134 | -       | SDCBP    | SDCBP    |
| hsa-miR-134 | -       | SDF2     | SDF2     |
| hsa-miR-134 | -       | SEC11A   | SEC11A   |
| hsa-miR-134 | -       | SEC14L3  | SEC14L3  |
| hsa-miR-134 | SEC22B  | SEC22B   | -        |
| hsa-miR-134 | -       | SEC61A2  | SEC61A2  |
| hsa-miR-134 | SEC62   | SEC62    | -        |
| hsa-miR-134 | -       | SELP     | SELP     |
| hsa-miR-134 | -       | SERPINA9 | SERPINA9 |
| hsa-miR-134 | -       | SFXN1    | SFXN1    |
| hsa-miR-134 | -       | SGMS1    | SGMS1    |
| hsa-miR-134 | SH2B3   | SH2B3    | -        |
| hsa-miR-134 | -       | SHARPIN  | SHARPIN  |
| hsa-miR-134 | -       | SLAMF1   | SLAMF1   |
| hsa-miR-134 | -       | SLC14A1  | SLC14A1  |
| hsa-miR-134 | -       | SLC15A4  | SLC15A4  |
| hsa-miR-134 | -       | SLC16A4  | SLC16A4  |
| hsa-miR-134 | -       | SLC22A10 | SLC22A10 |
| hsa-miR-134 | SLC30A4 | SLC30A4  | -        |
| hsa-miR-134 | -       | SLC37A3  | SLC37A3  |
| hsa-miR-134 | -       | SLC5A1   | SLC5A1   |
| hsa-miR-134 | -       | SLC5A12  | SLC5A12  |
| hsa-miR-134 | -       | SLC5A2   | SLC5A2   |
| hsa-miR-134 | -       | SMARCE1  | SMARCE1  |
| hsa-miR-134 | -       | SMC1B    | SMC1B    |
| hsa-miR-134 | -       | SOD2     | SOD2     |
| hsa-miR-134 | -       | SPTAN1   | SPTAN1   |
| hsa-miR-134 | -       | SQRDL    | SQRDL    |
| hsa-miR-134 | SRRM4   | SRRM4    | -        |
| hsa-miR-134 | SSBP2   | SSBP2    | -        |
| hsa-miR-134 | -       | SSX3     | SSX3     |
| hsa-miR-134 | -       | SSX4     | SSX4     |
| hsa-miR-134 | -       | SSX4B    | SSX4B    |
| hsa-miR-134 | -       | SSX5     | SSX5     |
| hsa-miR-134 | -       | SSX6     | SSX6     |
| hsa-miR-134 | -       | SSX7     | SSX7     |

|             |          |          |         |
|-------------|----------|----------|---------|
| hsa-miR-134 | -        | SSX8     | SSX8    |
| hsa-miR-134 | -        | SSX9     | SSX9    |
| hsa-miR-134 | STAT5B   | STAT5B   | -       |
| hsa-miR-134 | STK40    | STK40    | -       |
| hsa-miR-134 | STX16    | STX16    | -       |
| hsa-miR-134 | SUDS3    | SUDS3    | -       |
| hsa-miR-134 | -        | SUMO3    | SUMO3   |
| hsa-miR-134 | SYT11    | SYT11    | -       |
| hsa-miR-134 | TAB1     | TAB1     | -       |
| hsa-miR-134 | -        | TALDO1   | TALDO1  |
| hsa-miR-134 | -        | TBC1D19  | TBC1D19 |
| hsa-miR-134 | -        | TBC1D7   | TBC1D7  |
| hsa-miR-134 | TCF21    | TCF21    | -       |
| hsa-miR-134 | -        | TEKT3    | TEKT3   |
| hsa-miR-134 | TIGD5    | -        | TIGD5   |
| hsa-miR-134 | -        | TM4SF4   | TM4SF4  |
| hsa-miR-134 | -        | TM7SF4   | TM7SF4  |
| hsa-miR-134 | -        | TMEM64   | TMEM64  |
| hsa-miR-134 | TMOD1    | TMOD1    | -       |
| hsa-miR-134 | -        | TMPRSS5  | TMPRSS5 |
| hsa-miR-134 | -        | TOMM22   | TOMM22  |
| hsa-miR-134 | -        | TOMM7    | TOMM7   |
| hsa-miR-134 | TRAPPC10 | TRAPPC10 | -       |
| hsa-miR-134 | -        | TRIM7    | TRIM7   |
| hsa-miR-134 | TRIM9    | TRIM9    | -       |
| hsa-miR-134 | -        | TRNT1    | TRNT1   |
| hsa-miR-134 | TTBK1    | TTBK1    | -       |
| hsa-miR-134 | TTC39C   | TTC39C   | -       |
| hsa-miR-134 | -        | TTLL9    | TTLL9   |
| hsa-miR-134 | -        | TUBB2C   | TUBB2C  |
| hsa-miR-134 | TULP1    | -        | TULP1   |
| hsa-miR-134 | -        | UBAP1    | UBAP1   |
| hsa-miR-134 | -        | UNC45A   | UNC45A  |
| hsa-miR-134 | -        | USP18    | USP18   |
| hsa-miR-134 | USP9X    | USP9X    | -       |
| hsa-miR-134 | -        | VPS39    | VPS39   |
| hsa-miR-134 | -        | WDR67    | WDR67   |
| hsa-miR-134 | -        | WFDC8    | WFDC8   |
| hsa-miR-134 | -        | WNT1     | WNT1    |
| hsa-miR-134 | WWOX     | WWOX     | -       |
| hsa-miR-134 | -        | XCL1     | XCL1    |
| hsa-miR-134 | -        | XRCC5    | XRCC5   |
| hsa-miR-134 | -        | YY1      | YY1     |
| hsa-miR-134 | -        | ZBTB1    | ZBTB1   |
| hsa-miR-134 | -        | ZCCHC6   | ZCCHC6  |
| hsa-miR-134 | -        | ZDHHC9   | ZDHHC9  |
| hsa-miR-134 | -        | ZMYND8   | ZMYND8  |
| hsa-miR-134 | -        | ZNF124   | ZNF124  |
| hsa-miR-134 | -        | ZNF135   | ZNF135  |
| hsa-miR-134 | -        | ZNF169   | ZNF169  |
| hsa-miR-134 | -        | ZNF18    | ZNF18   |

|                |         |           |           |
|----------------|---------|-----------|-----------|
| hsa-miR-134    | -       | ZNF354C   | ZNF354C   |
| hsa-miR-134    | -       | ZNF415    | ZNF415    |
| hsa-miR-134    | -       | ZNF511    | ZNF511    |
| hsa-miR-134    | ZSCAN12 | ZSCAN12   | -         |
| hsa-miR-139-5p | -       | ABI2      | ABI2      |
| hsa-miR-139-5p | -       | ADAMTS6   | ADAMTS6   |
| hsa-miR-139-5p | -       | AIG1      | AIG1      |
| hsa-miR-139-5p | -       | ALS2CR8   | ALS2CR8   |
| hsa-miR-139-5p | -       | ANGPTL5   | ANGPTL5   |
| hsa-miR-139-5p | -       | ANK1      | ANK1      |
| hsa-miR-139-5p | -       | ANK2      | ANK2      |
| hsa-miR-139-5p | -       | AQR       | AQR       |
| hsa-miR-139-5p | -       | ATG4D     | ATG4D     |
| hsa-miR-139-5p | -       | ATP5G3    | ATP5G3    |
| hsa-miR-139-5p | -       | ATXN3L    | ATXN3L    |
| hsa-miR-139-5p | -       | ATXN7     | ATXN7     |
| hsa-miR-139-5p | -       | ATXN7L1   | ATXN7L1   |
| hsa-miR-139-5p | -       | AVPI1     | AVPI1     |
| hsa-miR-139-5p | -       | B3GALNT2  | B3GALNT2  |
| hsa-miR-139-5p | -       | BAZ2B     | BAZ2B     |
| hsa-miR-139-5p | -       | BBX       | BBX       |
| hsa-miR-139-5p | -       | BCAS3     | BCAS3     |
| hsa-miR-139-5p | -       | BCL7B     | BCL7B     |
| hsa-miR-139-5p | -       | BCOR      | BCOR      |
| hsa-miR-139-5p | -       | BFSP1     | BFSP1     |
| hsa-miR-139-5p | -       | BMP10     | BMP10     |
| hsa-miR-139-5p | -       | BMPR1A    | BMPR1A    |
| hsa-miR-139-5p | -       | BTG3      | BTG3      |
| hsa-miR-139-5p | -       | C10orf119 | C10orf119 |
| hsa-miR-139-5p | -       | C10orf12  | C10orf12  |

|                |   |           |           |
|----------------|---|-----------|-----------|
| 5p             |   |           |           |
| hsa-miR-139-5p | - | C14orf145 | C14orf145 |
| hsa-miR-139-5p | - | C15orf29  | C15orf29  |
| hsa-miR-139-5p | - | C17orf58  | C17orf58  |
| hsa-miR-139-5p | - | C17orf75  | C17orf75  |
| hsa-miR-139-5p | - | C5orf4    | C5orf4    |
| hsa-miR-139-5p | - | C6orf114  | C6orf114  |
| hsa-miR-139-5p | - | C7orf36   | C7orf36   |
| hsa-miR-139-5p | - | C9orf72   | C9orf72   |
| hsa-miR-139-5p | - | CA14      | CA14      |
| hsa-miR-139-5p | - | CACNA2D2  | CACNA2D2  |
| hsa-miR-139-5p | - | CBLB      | CBLB      |
| hsa-miR-139-5p | - | CBLL1     | CBLL1     |
| hsa-miR-139-5p | - | CCDC48    | CCDC48    |
| hsa-miR-139-5p | - | CCNB1     | CCNB1     |
| hsa-miR-139-5p | - | CCNT2     | CCNT2     |
| hsa-miR-139-5p | - | CCPG1     | CCPG1     |
| hsa-miR-139-5p | - | CCT8      | CCT8      |
| hsa-miR-139-5p | - | CDC42     | CDC42     |
| hsa-miR-139-5p | - | CDCA8     | CDCA8     |
| hsa-miR-139-5p | - | CDK7      | CDK7      |
| hsa-miR-139-5p | - | CDS2      | CDS2      |
| hsa-miR-139-5p | - | CENPJ     | CENPJ     |
| hsa-miR-139-5p | - | CEP110    | CEP110    |
| hsa-miR-139-5p | - | CEP290    | CEP290    |
| hsa-miR-139-5p | - | CIITA     | CIITA     |
| hsa-miR-139-5p | - | CKS2      | CKS2      |
| hsa-miR-139-5p | - | CLPX      | CLPX      |
| hsa-miR-139-5p | - | CMYA5     | CMYA5     |

|                |   |          |          |
|----------------|---|----------|----------|
| 5p             |   |          |          |
| hsa-miR-139-5p | - | CNTNAP4  | CNTNAP4  |
| hsa-miR-139-5p | - | CPA4     | CPA4     |
| hsa-miR-139-5p | - | CROCC    | CROCC    |
| hsa-miR-139-5p | - | CTSC     | CTSC     |
| hsa-miR-139-5p | - | CXCR4    | CXCR4    |
| hsa-miR-139-5p | - | CYP24A1  | CYP24A1  |
| hsa-miR-139-5p | - | CYorf15B | CYorf15B |
| hsa-miR-139-5p | - | DENR     | DENR     |
| hsa-miR-139-5p | - | DGAT2L6  | DGAT2L6  |
| hsa-miR-139-5p | - | DNAJC16  | DNAJC16  |
| hsa-miR-139-5p | - | DNER     | DNER     |
| hsa-miR-139-5p | - | DPEP2    | DPEP2    |
| hsa-miR-139-5p | - | DSN1     | DSN1     |
| hsa-miR-139-5p | - | DTX3     | DTX3     |
| hsa-miR-139-5p | - | DUSP19   | DUSP19   |
| hsa-miR-139-5p | - | DUSP27   | DUSP27   |
| hsa-miR-139-5p | - | DYNC2LI1 | DYNC2LI1 |
| hsa-miR-139-5p | - | EIF4G2   | EIF4G2   |
| hsa-miR-139-5p | - | EMX1     | EMX1     |
| hsa-miR-139-5p | - | EZH2     | EZH2     |
| hsa-miR-139-5p | - | FAM38A   | FAM38A   |
| hsa-miR-139-5p | - | FANCB    | FANCB    |
| hsa-miR-139-5p | - | FBN2     | FBN2     |
| hsa-miR-139-5p | - | FGA      | FGA      |
| hsa-miR-139-5p | - | FGF18    | FGF18    |
| hsa-miR-139-5p | - | FOS      | FOS      |
| hsa-miR-139-5p | - | FOXP2    | FOXP2    |
| hsa-miR-139-5p | - | FXR2     | FXR2     |

|                |   |          |          |
|----------------|---|----------|----------|
| 5p             |   |          |          |
| hsa-miR-139-5p | - | FYB      | FYB      |
| hsa-miR-139-5p | - | GAP43    | GAP43    |
| hsa-miR-139-5p | - | GATM     | GATM     |
| hsa-miR-139-5p | - | GBP5     | GBP5     |
| hsa-miR-139-5p | - | GCM2     | GCM2     |
| hsa-miR-139-5p | - | GDA      | GDA      |
| hsa-miR-139-5p | - | GDF10    | GDF10    |
| hsa-miR-139-5p | - | GLIPR1L1 | GLIPR1L1 |
| hsa-miR-139-5p | - | GPR37    | GPR37    |
| hsa-miR-139-5p | - | GPR56    | GPR56    |
| hsa-miR-139-5p | - | GTF2E2   | GTF2E2   |
| hsa-miR-139-5p | - | H2AFV    | H2AFV    |
| hsa-miR-139-5p | - | HARS2    | HARS2    |
| hsa-miR-139-5p | - | HDAC8    | HDAC8    |
| hsa-miR-139-5p | - | HES4     | HES4     |
| hsa-miR-139-5p | - | HMGN3    | HMGN3    |
| hsa-miR-139-5p | - | HOXB2    | HOXB2    |
| hsa-miR-139-5p | - | HOXD10   | HOXD10   |
| hsa-miR-139-5p | - | HP1BP3   | HP1BP3   |
| hsa-miR-139-5p | - | IFLTD1   | IFLTD1   |
| hsa-miR-139-5p | - | IMPG1    | IMPG1    |
| hsa-miR-139-5p | - | IPO11    | IPO11    |
| hsa-miR-139-5p | - | IPO13    | IPO13    |
| hsa-miR-139-5p | - | IPO7     | IPO7     |
| hsa-miR-139-5p | - | IRX2     | IRX2     |
| hsa-miR-139-5p | - | JAK1     | JAK1     |
| hsa-miR-139-5p | - | KCNA5    | KCNA5    |
| hsa-miR-139-5p | - | KIAA0090 | KIAA0090 |

|                |   |           |           |
|----------------|---|-----------|-----------|
| 5p             |   |           |           |
| hsa-miR-139-5p | - | KIAA1324L | KIAA1324L |
| hsa-miR-139-5p | - | KIAA1409  | KIAA1409  |
| hsa-miR-139-5p | - | KIAA1429  | KIAA1429  |
| hsa-miR-139-5p | - | KIF9      | KIF9      |
| hsa-miR-139-5p | - | KLC1      | KLC1      |
| hsa-miR-139-5p | - | KPNA2     | KPNA2     |
| hsa-miR-139-5p | - | LDHB      | LDHB      |
| hsa-miR-139-5p | - | LMO4      | LMO4      |
| hsa-miR-139-5p | - | LRCH2     | LRCH2     |
| hsa-miR-139-5p | - | LRFN5     | LRFN5     |
| hsa-miR-139-5p | - | LRP12     | LRP12     |
| hsa-miR-139-5p | - | LRP2      | LRP2      |
| hsa-miR-139-5p | - | LRRN3     | LRRN3     |
| hsa-miR-139-5p | - | LSG1      | LSG1      |
| hsa-miR-139-5p | - | LSM1      | LSM1      |
| hsa-miR-139-5p | - | LSM14B    | LSM14B    |
| hsa-miR-139-5p | - | MAD2L1    | MAD2L1    |
| hsa-miR-139-5p | - | MAP3K5    | MAP3K5    |
| hsa-miR-139-5p | - | MAP9      | MAP9      |
| hsa-miR-139-5p | - | MARCH7    | MARCH7    |
| hsa-miR-139-5p | - | MAST4     | MAST4     |
| hsa-miR-139-5p | - | MBD1      | MBD1      |
| hsa-miR-139-5p | - | MCHR2     | MCHR2     |
| hsa-miR-139-5p | - | MED4      | MED4      |
| hsa-miR-139-5p | - | MGAT4A    | MGAT4A    |
| hsa-miR-139-5p | - | MOCS2     | MOCS2     |
| hsa-miR-139-5p | - | MPDZ      | MPDZ      |
| hsa-miR-139-5p | - | MR1       | MR1       |



|                |   |          |          |
|----------------|---|----------|----------|
| 5p             |   |          |          |
| hsa-miR-139-5p | - | MRPL42   | MRPL42   |
| hsa-miR-139-5p | - | MRPL48   | MRPL48   |
| hsa-miR-139-5p | - | NDUFB5   | NDUFB5   |
| hsa-miR-139-5p | - | NEK11    | NEK11    |
| hsa-miR-139-5p | - | NEU1     | NEU1     |
| hsa-miR-139-5p | - | NMD3     | NMD3     |
| hsa-miR-139-5p | - | NME7     | NME7     |
| hsa-miR-139-5p | - | NMI      | NMI      |
| hsa-miR-139-5p | - | NOTCH1   | NOTCH1   |
| hsa-miR-139-5p | - | NOX1     | NOX1     |
| hsa-miR-139-5p | - | NOX5     | NOX5     |
| hsa-miR-139-5p | - | NPPA     | NPPA     |
| hsa-miR-139-5p | - | NRK      | NRK      |
| hsa-miR-139-5p | - | NTNG1    | NTNG1    |
| hsa-miR-139-5p | - | NUBP2    | NUBP2    |
| hsa-miR-139-5p | - | NUP210   | NUP210   |
| hsa-miR-139-5p | - | OLFM1    | OLFM1    |
| hsa-miR-139-5p | - | OPN5     | OPN5     |
| hsa-miR-139-5p | - | OSR2     | OSR2     |
| hsa-miR-139-5p | - | P2RY12   | P2RY12   |
| hsa-miR-139-5p | - | PAFAH1B2 | PAFAH1B2 |
| hsa-miR-139-5p | - | PAPD4    | PAPD4    |
| hsa-miR-139-5p | - | PBX3     | PBX3     |
| hsa-miR-139-5p | - | PBXIP1   | PBXIP1   |
| hsa-miR-139-5p | - | PCDH10   | PCDH10   |
| hsa-miR-139-5p | - | PCDHB14  | PCDHB14  |
| hsa-miR-139-5p | - | PDE3A    | PDE3A    |
| hsa-miR-139-5p | - | PDE4A    | PDE4A    |

|                |   |           |           |
|----------------|---|-----------|-----------|
| 5p             |   |           |           |
| hsa-miR-139-5p | - | PDE4DIP   | PDE4DIP   |
| hsa-miR-139-5p | - | PEX1      | PEX1      |
| hsa-miR-139-5p | - | PFDN6     | PFDN6     |
| hsa-miR-139-5p | - | PGBD1     | PGBD1     |
| hsa-miR-139-5p | - | PGGT1B    | PGGT1B    |
| hsa-miR-139-5p | - | PHF11     | PHF11     |
| hsa-miR-139-5p | - | PHKA1     | PHKA1     |
| hsa-miR-139-5p | - | PIGW      | PIGW      |
| hsa-miR-139-5p | - | PIN4      | PIN4      |
| hsa-miR-139-5p | - | PLEKHG6   | PLEKHG6   |
| hsa-miR-139-5p | - | PPP2R2A   | PPP2R2A   |
| hsa-miR-139-5p | - | PRKAA1    | PRKAA1    |
| hsa-miR-139-5p | - | PRKAR2A   | PRKAR2A   |
| hsa-miR-139-5p | - | PRKD3     | PRKD3     |
| hsa-miR-139-5p | - | PRKG2     | PRKG2     |
| hsa-miR-139-5p | - | PRR15     | PRR15     |
| hsa-miR-139-5p | - | PSAT1     | PSAT1     |
| hsa-miR-139-5p | - | PTPRF     | PTPRF     |
| hsa-miR-139-5p | - | PTPRU     | PTPRU     |
| hsa-miR-139-5p | - | PTRH1     | PTRH1     |
| hsa-miR-139-5p | - | RAB11FIP5 | RAB11FIP5 |
| hsa-miR-139-5p | - | RAB27A    | RAB27A    |
| hsa-miR-139-5p | - | RAB30     | RAB30     |
| hsa-miR-139-5p | - | RAP1GDS1  | RAP1GDS1  |
| hsa-miR-139-5p | - | RASSF8    | RASSF8    |
| hsa-miR-139-5p | - | RBBP6     | RBBP6     |
| hsa-miR-139-5p | - | RBM22     | RBM22     |
| hsa-miR-139-5p | - | RBM23     | RBM23     |

|                |   |          |          |
|----------------|---|----------|----------|
| 5p             |   |          |          |
| hsa-miR-139-5p | - | RBM24    | RBM24    |
| hsa-miR-139-5p | - | REM1     | REM1     |
| hsa-miR-139-5p | - | REV1     | REV1     |
| hsa-miR-139-5p | - | RFC3     | RFC3     |
| hsa-miR-139-5p | - | RG9MTD1  | RG9MTD1  |
| hsa-miR-139-5p | - | RGL3     | RGL3     |
| hsa-miR-139-5p | - | RLBP1    | RLBP1    |
| hsa-miR-139-5p | - | RORB     | RORB     |
| hsa-miR-139-5p | - | RSBN1L   | RSBN1L   |
| hsa-miR-139-5p | - | RYR2     | RYR2     |
| hsa-miR-139-5p | - | SAT1     | SAT1     |
| hsa-miR-139-5p | - | SDAD1    | SDAD1    |
| hsa-miR-139-5p | - | SELL     | SELL     |
| hsa-miR-139-5p | - | SEPT3    | SEPT3    |
| hsa-miR-139-5p | - | SEPT8    | SEPT8    |
| hsa-miR-139-5p | - | SERPIND1 | SERPIND1 |
| hsa-miR-139-5p | - | SFRS4    | SFRS4    |
| hsa-miR-139-5p | - | SLC16A6  | SLC16A6  |
| hsa-miR-139-5p | - | SLC16A9  | SLC16A9  |
| hsa-miR-139-5p | - | SLC25A29 | SLC25A29 |
| hsa-miR-139-5p | - | SLC25A3  | SLC25A3  |
| hsa-miR-139-5p | - | SLC35A2  | SLC35A2  |
| hsa-miR-139-5p | - | SLC5A1   | SLC5A1   |
| hsa-miR-139-5p | - | SLITRK4  | SLITRK4  |
| hsa-miR-139-5p | - | SMARCA4  | SMARCA4  |
| hsa-miR-139-5p | - | SMARCA5  | SMARCA5  |
| hsa-miR-139-5p | - | SNX2     | SNX2     |
| hsa-miR-139-5p | - | SOCS2    | SOCS2    |

|                |   |         |         |
|----------------|---|---------|---------|
| 5p             |   |         |         |
| hsa-miR-139-5p | - | SOD1    | SOD1    |
| hsa-miR-139-5p | - | STIM1   | STIM1   |
| hsa-miR-139-5p | - | STIM2   | STIM2   |
| hsa-miR-139-5p | - | SYDE2   | SYDE2   |
| hsa-miR-139-5p | - | SYN3    | SYN3    |
| hsa-miR-139-5p | - | SYT14   | SYT14   |
| hsa-miR-139-5p | - | TAC3    | TAC3    |
| hsa-miR-139-5p | - | TASP1   | TASP1   |
| hsa-miR-139-5p | - | TBX1    | TBX1    |
| hsa-miR-139-5p | - | TCP11L1 | TCP11L1 |
| hsa-miR-139-5p | - | TEK     | TEK     |
| hsa-miR-139-5p | - | TEX2    | TEX2    |
| hsa-miR-139-5p | - | TGFB1   | TGFB1   |
| hsa-miR-139-5p | - | TGIF1   | TGIF1   |
| hsa-miR-139-5p | - | TLE1    | TLE1    |
| hsa-miR-139-5p | - | TMEM51  | TMEM51  |
| hsa-miR-139-5p | - | TMEM69  | TMEM69  |
| hsa-miR-139-5p | - | TMEM90A | TMEM90A |
| hsa-miR-139-5p | - | TMF1    | TMF1    |
| hsa-miR-139-5p | - | TNFSF10 | TNFSF10 |
| hsa-miR-139-5p | - | TOPBP1  | TOPBP1  |
| hsa-miR-139-5p | - | TRIM24  | TRIM24  |
| hsa-miR-139-5p | - | TSPAN3  | TSPAN3  |
| hsa-miR-139-5p | - | TSPAN5  | TSPAN5  |
| hsa-miR-139-5p | - | TTK     | TTK     |
| hsa-miR-139-5p | - | TTN     | TTN     |
| hsa-miR-139-5p | - | UBE2F   | UBE2F   |
| hsa-miR-139-5p | - | UGT3A2  | UGT3A2  |

|                |        |          |          |
|----------------|--------|----------|----------|
| 5p             |        |          |          |
| hsa-miR-139-5p | -      | UNC45A   | UNC45A   |
| hsa-miR-139-5p | -      | USP47    | USP47    |
| hsa-miR-139-5p | -      | WDR61    | WDR61    |
| hsa-miR-139-5p | -      | WDR8     | WDR8     |
| hsa-miR-139-5p | -      | YRDC     | YRDC     |
| hsa-miR-139-5p | -      | ZBED3    | ZBED3    |
| hsa-miR-139-5p | -      | ZBTB10   | ZBTB10   |
| hsa-miR-139-5p | -      | ZIK1     | ZIK1     |
| hsa-miR-139-5p | -      | ZMYND12  | ZMYND12  |
| hsa-miR-139-5p | -      | ZNF100   | ZNF100   |
| hsa-miR-139-5p | -      | ZNF177   | ZNF177   |
| hsa-miR-139-5p | -      | ZNF181   | ZNF181   |
| hsa-miR-139-5p | -      | ZNF560   | ZNF560   |
| hsa-miR-139-5p | -      | ZNF678   | ZNF678   |
| hsa-miR-139-5p | -      | ZNF71    | ZNF71    |
| hsa-miR-139-5p | -      | ZNF792   | ZNF792   |
| hsa-miR-146a   | -      | ACTR3    | ACTR3    |
| hsa-miR-146a   | -      | ADAM23   | ADAM23   |
| hsa-miR-146a   | -      | ADAMTS9  | ADAMTS9  |
| hsa-miR-146a   | ADARB1 | ADARB1   | -        |
| hsa-miR-146a   | -      | AFAP1L2  | AFAP1L2  |
| hsa-miR-146a   | -      | AKAP8    | AKAP8    |
| hsa-miR-146a   | -      | ANGPTL2  | ANGPTL2  |
| hsa-miR-146a   | AP3M2  | AP3M2    | -        |
| hsa-miR-146a   | APPL1  | APPL1    | -        |
| hsa-miR-146a   | -      | AQR      | AQR      |
| hsa-miR-146a   | -      | ARHGEF4  | ARHGEF4  |
| hsa-miR-146a   | -      | ARID3A   | ARID3A   |
| hsa-miR-146a   | -      | ARMC2    | ARMC2    |
| hsa-miR-146a   | ARMC8  | ARMC8    | -        |
| hsa-miR-146a   | ATG12  | ATG12    | -        |
| hsa-miR-146a   | ATG7   | ATG7     | -        |
| hsa-miR-146a   | -      | ATP10B   | ATP10B   |
| hsa-miR-146a   | -      | ATP5G2   | ATP5G2   |
| hsa-miR-146a   | -      | ATP6V1C2 | ATP6V1C2 |
| hsa-miR-146a   | -      | B3GALT2  | B3GALT2  |
| hsa-miR-146a   | -      | BCCIP    | BCCIP    |

|              |          |           |           |
|--------------|----------|-----------|-----------|
| hsa-miR-146a | BCL11A   | BCL11A    | -         |
| hsa-miR-146a | BCORL1   | BCORL1    | -         |
| hsa-miR-146a | -        | BLM       | BLM       |
| hsa-miR-146a | -        | BLZF1     | BLZF1     |
| hsa-miR-146a | BNC1     | BNC1      | -         |
| hsa-miR-146a | -        | BRCA1     | BRCA1     |
| hsa-miR-146a | BTG2     | BTG2      | -         |
| hsa-miR-146a | C10orf76 | C10orf76  | -         |
| hsa-miR-146a | -        | C10orf96  | C10orf96  |
| hsa-miR-146a | -        | C12orf51  | C12orf51  |
| hsa-miR-146a | -        | C14orf135 | C14orf135 |
| hsa-miR-146a | -        | C14orf166 | C14orf166 |
| hsa-miR-146a | C17orf75 | C17orf75  | -         |
| hsa-miR-146a | C17orf78 | C17orf78  | -         |
| hsa-miR-146a | C18orf19 | C18orf19  | -         |
| hsa-miR-146a | -        | C18orf34  | C18orf34  |
| hsa-miR-146a | -        | C1orf186  | C1orf186  |
| hsa-miR-146a | -        | C20orf26  | C20orf26  |
| hsa-miR-146a | -        | C21orf33  | C21orf33  |
| hsa-miR-146a | -        | C3orf24   | C3orf24   |
| hsa-miR-146a | -        | C3orf42   | C3orf42   |
| hsa-miR-146a | C4orf3   | C4orf3    | -         |
| hsa-miR-146a | C5orf4   | C5orf4    | -         |
| hsa-miR-146a | C5orf46  | C5orf46   | -         |
| hsa-miR-146a | C8orf84  | C8orf84   | -         |
| hsa-miR-146a | -        | C9orf6    | C9orf6    |
| hsa-miR-146a | CAMSAP1  | CAMSAP1   | -         |
| hsa-miR-146a | CAPN14   | CAPN14    | -         |
| hsa-miR-146a | -        | CAPZB     | CAPZB     |
| hsa-miR-146a | CARD10   | CARD10    | -         |
| hsa-miR-146a | CASZ1    | CASZ1     | -         |
| hsa-miR-146a | -        | CBARA1    | CBARA1    |
| hsa-miR-146a | -        | CCDC132   | CCDC132   |
| hsa-miR-146a | CCDC6    | CCDC6     | -         |
| hsa-miR-146a | -        | CCDC62    | CCDC62    |
| hsa-miR-146a | -        | CCK       | CCK       |
| hsa-miR-146a | CCNJ     | CCNJ      | -         |
| hsa-miR-146a | -        | CCR9      | CCR9      |
| hsa-miR-146a | -        | CD40LG    | CD40LG    |
| hsa-miR-146a | -        | CD53      | CD53      |
| hsa-miR-146a | CD80     | CD80      | -         |
| hsa-miR-146a | CDC42BPA | CDC42BPA  | -         |
| hsa-miR-146a | -        | CDH10     | CDH10     |
| hsa-miR-146a | -        | CDH18     | CDH18     |
| hsa-miR-146a | -        | CDKN3     | CDKN3     |
| hsa-miR-146a | CDON     | CDON      | -         |
| hsa-miR-146a | -        | CDR2      | CDR2      |
| hsa-miR-146a | CELF2    | CELF2     | -         |
| hsa-miR-146a | CELF3    | CELF3     | -         |
| hsa-miR-146a | -        | CEP290    | CEP290    |
| hsa-miR-146a | -        | CEP72     | CEP72     |

|              |        |         |         |
|--------------|--------|---------|---------|
| hsa-miR-146a | -      | CETN3   | CETN3   |
| hsa-miR-146a | -      | CFH     | CFH     |
| hsa-miR-146a | -      | CFHR1   | CFHR1   |
| hsa-miR-146a | -      | CHD1L   | CHD1L   |
| hsa-miR-146a | -      | CHEK1   | CHEK1   |
| hsa-miR-146a | -      | CKAP4   | CKAP4   |
| hsa-miR-146a | -      | CLASP2  | CLASP2  |
| hsa-miR-146a | -      | CLTA    | CLTA    |
| hsa-miR-146a | -      | CMAH    | CMAH    |
| hsa-miR-146a | -      | CNDP2   | CNDP2   |
| hsa-miR-146a | -      | CNTNAP4 | CNTNAP4 |
| hsa-miR-146a | -      | COASY   | COASY   |
| hsa-miR-146a | -      | COPS8   | COPS8   |
| hsa-miR-146a | -      | CRB3    | CRB3    |
| hsa-miR-146a | -      | CRELD2  | CRELD2  |
| hsa-miR-146a | -      | CRY1    | CRY1    |
| hsa-miR-146a | -      | CRYM    | CRYM    |
| hsa-miR-146a | CXorf1 | CXorf1  | -       |
| hsa-miR-146a | -      | CXorf22 | CXorf22 |
| hsa-miR-146a | -      | CYP27B1 | CYP27B1 |
| hsa-miR-146a | -      | CYP3A43 | CYP3A43 |
| hsa-miR-146a | -      | DAXX    | DAXX    |
| hsa-miR-146a | DCAF12 | DCAF12  | -       |
| hsa-miR-146a | -      | DCN     | DCN     |
| hsa-miR-146a | DCTN5  | DCTN5   | -       |
| hsa-miR-146a | -      | DHX15   | DHX15   |
| hsa-miR-146a | -      | DHX32   | DHX32   |
| hsa-miR-146a | -      | DIS3L   | DIS3L   |
| hsa-miR-146a | -      | DLGAP1  | DLGAP1  |
| hsa-miR-146a | -      | DMKN    | DMKN    |
| hsa-miR-146a | -      | DNAJC12 | DNAJC12 |
| hsa-miR-146a | DNAL1  | DNAL1   | -       |
| hsa-miR-146a | -      | DOCK1   | DOCK1   |
| hsa-miR-146a | -      | DSCR8   | DSCR8   |
| hsa-miR-146a | -      | DTX3    | DTX3    |
| hsa-miR-146a | -      | DUS2L   | DUS2L   |
| hsa-miR-146a | DYNLL2 | DYNLL2  | -       |
| hsa-miR-146a | EARS2  | -       | EARS2   |
| hsa-miR-146a | -      | ECD     | ECD     |
| hsa-miR-146a | EDNRB  | EDNRB   | -       |
| hsa-miR-146a | EIF4G2 | EIF4G2  | -       |
| hsa-miR-146a | ELAVL1 | ELAVL1  | -       |
| hsa-miR-146a | -      | EPHA5   | EPHA5   |
| hsa-miR-146a | -      | EPHX2   | EPHX2   |
| hsa-miR-146a | -      | ERICH1  | ERICH1  |
| hsa-miR-146a | ESYT2  | ESYT2   | -       |
| hsa-miR-146a | FAF2   | FAF2    | -       |
| hsa-miR-146a | -      | FAM122A | FAM122A |
| hsa-miR-146a | FAM26E | FAM26E  | -       |
| hsa-miR-146a | FAM43A | FAM43A  | -       |
| hsa-miR-146a | -      | FAM55D  | FAM55D  |

|              |         |          |          |
|--------------|---------|----------|----------|
| hsa-miR-146a | -       | FAM81B   | FAM81B   |
| hsa-miR-146a | -       | FAS      | FAS      |
| hsa-miR-146a | -       | FBXL5    | FBXL5    |
| hsa-miR-146a | FBXO28  | FBXO28   | -        |
| hsa-miR-146a | -       | FBXO3    | FBXO3    |
| hsa-miR-146a | -       | FBXO8    | FBXO8    |
| hsa-miR-146a | FBXW2   | -        | FBXW2    |
| hsa-miR-146a | FLOT2   | FLOT2    | -        |
| hsa-miR-146a | -       | FNBP4    | FNBP4    |
| hsa-miR-146a | FRYL    | FRYL     | -        |
| hsa-miR-146a | -       | FTH1     | FTH1     |
| hsa-miR-146a | -       | FTHL17   | FTHL17   |
| hsa-miR-146a | FZD1    | FZD1     | -        |
| hsa-miR-146a | GABPA   | GABPA    | -        |
| hsa-miR-146a | GALNT10 | GALNT10  | -        |
| hsa-miR-146a | -       | GARNL3   | GARNL3   |
| hsa-miR-146a | -       | GDA      | GDA      |
| hsa-miR-146a | -       | GIMAP4   | GIMAP4   |
| hsa-miR-146a | -       | GJB4     | GJB4     |
| hsa-miR-146a | -       | GLT25D2  | GLT25D2  |
| hsa-miR-146a | GLYATL3 | GLYATL3  | -        |
| hsa-miR-146a | -       | GNL3L    | GNL3L    |
| hsa-miR-146a | GOSR1   | GOSR1    | -        |
| hsa-miR-146a | -       | GPRASP2  | GPRASP2  |
| hsa-miR-146a | -       | GPX3     | GPX3     |
| hsa-miR-146a | -       | GRIA3    | GRIA3    |
| hsa-miR-146a | GRID1   | GRID1    | -        |
| hsa-miR-146a | -       | GTF2I    | GTF2I    |
| hsa-miR-146a | -       | HADHB    | HADHB    |
| hsa-miR-146a | -       | HAS2     | HAS2     |
| hsa-miR-146a | -       | HEPH     | HEPH     |
| hsa-miR-146a | -       | HMBOX1   | HMBOX1   |
| hsa-miR-146a | -       | HMGCL    | HMGCL    |
| hsa-miR-146a | HNRNPD  | HNRNPD   | -        |
| hsa-miR-146a | -       | HRH4     | HRH4     |
| hsa-miR-146a | -       | HSPA1A   | HSPA1A   |
| hsa-miR-146a | -       | HSPG2    | HSPG2    |
| hsa-miR-146a | IER5L   | IER5L    | -        |
| hsa-miR-146a | -       | IFIT3    | IFIT3    |
| hsa-miR-146a | -       | IFT20    | IFT20    |
| hsa-miR-146a | -       | IL3      | IL3      |
| hsa-miR-146a | -       | INTS8    | INTS8    |
| hsa-miR-146a | -       | IRF5     | IRF5     |
| hsa-miR-146a | JAZF1   | JAZF1    | -        |
| hsa-miR-146a | -       | KBTBD2   | KBTBD2   |
| hsa-miR-146a | -       | KCNC3    | KCNC3    |
| hsa-miR-146a | -       | KCNMB1   | KCNMB1   |
| hsa-miR-146a | KCTD15  | KCTD15   | -        |
| hsa-miR-146a | KDM2B   | KDM2B    | -        |
| hsa-miR-146a | -       | KIAA1949 | KIAA1949 |
| hsa-miR-146a | -       | KIF18A   | KIF18A   |



|              |        |          |          |
|--------------|--------|----------|----------|
| hsa-miR-146a | KIF24  | KIF24    | -        |
| hsa-miR-146a | -      | KIR2DL1  | KIR2DL1  |
| hsa-miR-146a | -      | KIR2DL4  | KIR2DL4  |
| hsa-miR-146a | -      | KLHL4    | KLHL4    |
| hsa-miR-146a | KPNA6  | KPNA6    | -        |
| hsa-miR-146a | -      | KRCC1    | KRCC1    |
| hsa-miR-146a | -      | KRT1     | KRT1     |
| hsa-miR-146a | -      | KRT23    | KRT23    |
| hsa-miR-146a | -      | LAMA2    | LAMA2    |
| hsa-miR-146a | -      | LAMB3    | LAMB3    |
| hsa-miR-146a | -      | LARP6    | LARP6    |
| hsa-miR-146a | LFNG   | LFNG     | -        |
| hsa-miR-146a | -      | LILRB4   | LILRB4   |
| hsa-miR-146a | -      | LPHN2    | LPHN2    |
| hsa-miR-146a | LRP2   | LRP2     | -        |
| hsa-miR-146a | -      | LRRK1    | LRRK1    |
| hsa-miR-146a | LRRTM2 | LRRTM2   | -        |
| hsa-miR-146a | LRTOMT | LRTOMT   | -        |
| hsa-miR-146a | -      | LSM14B   | LSM14B   |
| hsa-miR-146a | -      | MAGEE1   | MAGEE1   |
| hsa-miR-146a | -      | MARK1    | MARK1    |
| hsa-miR-146a | -      | MARK2    | MARK2    |
| hsa-miR-146a | -      | MCTP2    | MCTP2    |
| hsa-miR-146a | MED1   | MED1     | -        |
| hsa-miR-146a | -      | METT5D1  | METT5D1  |
| hsa-miR-146a | -      | METTL4   | METTL4   |
| hsa-miR-146a | -      | METTL7A  | METTL7A  |
| hsa-miR-146a | MLL2   | MLL2     | -        |
| hsa-miR-146a | MMP16  | MMP16    | -        |
| hsa-miR-146a | -      | MPHOSPH6 | MPHOSPH6 |
| hsa-miR-146a | MPPE1  | MPPE1    | -        |
| hsa-miR-146a | -      | MR1      | MR1      |
| hsa-miR-146a | -      | MRPL10   | MRPL10   |
| hsa-miR-146a | -      | MRPL33   | MRPL33   |
| hsa-miR-146a | -      | MTA2     | MTA2     |
| hsa-miR-146a | -      | MTL5     | MTL5     |
| hsa-miR-146a | -      | MVD      | MVD      |
| hsa-miR-146a | MYBL1  | MYBL1    | -        |
| hsa-miR-146a | MYO5A  | MYO5A    | -        |
| hsa-miR-146a | NAIF1  | NAIF1    | -        |
| hsa-miR-146a | -      | NEB      | NEB      |
| hsa-miR-146a | NF2    | NF2      | -        |
| hsa-miR-146a | -      | NFE2     | NFE2     |
| hsa-miR-146a | NFIX   | -        | NFIX     |
| hsa-miR-146a | -      | NHLH2    | NHLH2    |
| hsa-miR-146a | -      | NKIRAS2  | NKIRAS2  |
| hsa-miR-146a | -      | NME1     | NME1     |
| hsa-miR-146a | -      | NODAL    | NODAL    |
| hsa-miR-146a | NOTCH2 | NOTCH2   | -        |
| hsa-miR-146a | NOVA1  | NOVA1    | -        |
| hsa-miR-146a | -      | NOX4     | NOX4     |

|              |         |          |          |
|--------------|---------|----------|----------|
| hsa-miR-146a | NPR3    | NPR3     | -        |
| hsa-miR-146a | NRAS    | NRAS     | -        |
| hsa-miR-146a | NRIP3   | NRIP3    | -        |
| hsa-miR-146a | NRP2    | NRP2     | -        |
| hsa-miR-146a | NUCKS1  | NUCKS1   | -        |
| hsa-miR-146a | NUMB    | NUMB     | -        |
| hsa-miR-146a | -       | OR9Q1    | OR9Q1    |
| hsa-miR-146a | -       | ORC5L    | ORC5L    |
| hsa-miR-146a | -       | PABPC1   | PABPC1   |
| hsa-miR-146a | PAQR9   | PAQR9    | -        |
| hsa-miR-146a | -       | PBLD     | PBLD     |
| hsa-miR-146a | PBX2    | -        | PBX2     |
| hsa-miR-146a | -       | PCBP4    | PCBP4    |
| hsa-miR-146a | PCDH1   | PCDH1    | -        |
| hsa-miR-146a | -       | PDE6H    | PDE6H    |
| hsa-miR-146a | -       | PDLIM1   | PDLIM1   |
| hsa-miR-146a | -       | PHF1     | PHF1     |
| hsa-miR-146a | -       | PHKB     | PHKB     |
| hsa-miR-146a | -       | PIWIL4   | PIWIL4   |
| hsa-miR-146a | -       | PLCXD1   | PLCXD1   |
| hsa-miR-146a | -       | PLEKHA5  | PLEKHA5  |
| hsa-miR-146a | PLEKHH2 | PLEKHH2  | -        |
| hsa-miR-146a | PM20D2  | PM20D2   | -        |
| hsa-miR-146a | -       | PMCHL2   | PMCHL2   |
| hsa-miR-146a | -       | PMS1     | PMS1     |
| hsa-miR-146a | -       | POFUT2   | POFUT2   |
| hsa-miR-146a | -       | POR      | POR      |
| hsa-miR-146a | -       | PPBP     | PPBP     |
| hsa-miR-146a | -       | PPIH     | PPIH     |
| hsa-miR-146a | -       | PRAMEF14 | PRAMEF14 |
| hsa-miR-146a | -       | PRAMEF2  | PRAMEF2  |
| hsa-miR-146a | PRC1    | PRC1     | -        |
| hsa-miR-146a | -       | PRDM5    | PRDM5    |
| hsa-miR-146a | -       | PRDX4    | PRDX4    |
| hsa-miR-146a | PRKCE   | PRKCE    | -        |
| hsa-miR-146a | -       | PRKCI    | PRKCI    |
| hsa-miR-146a | -       | PRPS1    | PRPS1    |
| hsa-miR-146a | -       | PRR15    | PRR15    |
| hsa-miR-146a | -       | PSMA5    | PSMA5    |
| hsa-miR-146a | -       | PSMC6    | PSMC6    |
| hsa-miR-146a | PSMD3   | PSMD3    | -        |
| hsa-miR-146a | PTGFRN  | PTGFRN   | -        |
| hsa-miR-146a | -       | RAB41    | RAB41    |
| hsa-miR-146a | RABGAP1 | RABGAP1  | -        |
| hsa-miR-146a | -       | RAC2     | RAC2     |
| hsa-miR-146a | -       | RARA     | RARA     |
| hsa-miR-146a | RCSD1   | RCSD1    | -        |
| hsa-miR-146a | RFTN2   | RFTN2    | -        |
| hsa-miR-146a | -       | RIBC1    | RIBC1    |
| hsa-miR-146a | RNASEL  | RNASEL   | -        |
| hsa-miR-146a | -       | RNF10    | RNF10    |

|              |         |          |          |
|--------------|---------|----------|----------|
| hsa-miR-146a | -       | RNF14    | RNF14    |
| hsa-miR-146a | -       | RNF26    | RNF26    |
| hsa-miR-146a | ROBO1   | ROBO1    | -        |
| hsa-miR-146a | -       | RPL27A   | RPL27A   |
| hsa-miR-146a | -       | RPL34    | RPL34    |
| hsa-miR-146a | RRM2B   | RRM2B    | -        |
| hsa-miR-146a | -       | RUNX1    | RUNX1    |
| hsa-miR-146a | RUNX1T1 | RUNX1T1  | -        |
| hsa-miR-146a | -       | S100A10  | S100A10  |
| hsa-miR-146a | -       | SAP30BP  | SAP30BP  |
| hsa-miR-146a | SCN3B   | SCN3B    | -        |
| hsa-miR-146a | -       | SCUBE2   | SCUBE2   |
| hsa-miR-146a | -       | SDCBP    | SDCBP    |
| hsa-miR-146a | SEC23IP | SEC23IP  | -        |
| hsa-miR-146a | -       | SEC31B   | SEC31B   |
| hsa-miR-146a | -       | SESN3    | SESN3    |
| hsa-miR-146a | -       | SFRS5    | SFRS5    |
| hsa-miR-146a | -       | SH3BGR   | SH3BGR   |
| hsa-miR-146a | SH3GL2  | SH3GL2   | -        |
| hsa-miR-146a | SH3TC2  | SH3TC2   | -        |
| hsa-miR-146a | SIAH2   | SIAH2    | -        |
| hsa-miR-146a | -       | SLC1A1   | SLC1A1   |
| hsa-miR-146a | -       | SLC1A5   | SLC1A5   |
| hsa-miR-146a | -       | SLC25A14 | SLC25A14 |
| hsa-miR-146a | -       | SLC25A5  | SLC25A5  |
| hsa-miR-146a | SLC2A3  | SLC2A3   | -        |
| hsa-miR-146a | SLC38A1 | SLC38A1  | -        |
| hsa-miR-146a | SLC39A1 | SLC39A1  | -        |
| hsa-miR-146a | SLCO3A1 | SLCO3A1  | -        |
| hsa-miR-146a | SMAD4   | SMAD4    | -        |
| hsa-miR-146a | SMARCA5 | SMARCA5  | -        |
| hsa-miR-146a | -       | SMC5     | SMC5     |
| hsa-miR-146a | -       | SMPX     | SMPX     |
| hsa-miR-146a | SORT1   | SORT1    | -        |
| hsa-miR-146a | SP8     | SP8      | -        |
| hsa-miR-146a | -       | SPCS1    | SPCS1    |
| hsa-miR-146a | -       | SPG7     | SPG7     |
| hsa-miR-146a | -       | SRPRB    | SRPRB    |
| hsa-miR-146a | ST8SIA4 | ST8SIA4  | -        |
| hsa-miR-146a | STC1    | STC1     | -        |
| hsa-miR-146a | -       | STIL     | STIL     |
| hsa-miR-146a | -       | STK32A   | STK32A   |
| hsa-miR-146a | STRA13  | STRA13   | -        |
| hsa-miR-146a | STRN    | STRN     | -        |
| hsa-miR-146a | -       | SYCE1    | SYCE1    |
| hsa-miR-146a | -       | SYCE2    | SYCE2    |
| hsa-miR-146a | SYT1    | SYT1     | -        |
| hsa-miR-146a | -       | TBX18    | TBX18    |
| hsa-miR-146a | -       | TGIF1    | TGIF1    |
| hsa-miR-146a | -       | THAP11   | THAP11   |
| hsa-miR-146a | -       | TIMELESS | TIMELESS |

|              |          |          |          |
|--------------|----------|----------|----------|
| hsa-miR-146a | -        | TIMM17B  | TIMM17B  |
| hsa-miR-146a | -        | TIMP4    | TIMP4    |
| hsa-miR-146a | -        | TINAG    | TINAG    |
| hsa-miR-146a | -        | TM2D1    | TM2D1    |
| hsa-miR-146a | -        | TMEM115  | TMEM115  |
| hsa-miR-146a | TMEM136  | TMEM136  | -        |
| hsa-miR-146a | -        | TMEM185B | TMEM185B |
| hsa-miR-146a | TMEM194A | TMEM194A | -        |
| hsa-miR-146a | -        | TMEM66   | TMEM66   |
| hsa-miR-146a | -        | TMEM87B  | TMEM87B  |
| hsa-miR-146a | -        | TNFAIP8  | TNFAIP8  |
| hsa-miR-146a | -        | TRIM14   | TRIM14   |
| hsa-miR-146a | -        | TRIT1    | TRIT1    |
| hsa-miR-146a | -        | TSPAN18  | TSPAN18  |
| hsa-miR-146a | -        | TSPYL1   | TSPYL1   |
| hsa-miR-146a | -        | TTC21B   | TTC21B   |
| hsa-miR-146a | -        | TXNRD3   | TXNRD3   |
| hsa-miR-146a | -        | UBR1     | UBR1     |
| hsa-miR-146a | -        | UGP2     | UGP2     |
| hsa-miR-146a | -        | UMPS     | UMPS     |
| hsa-miR-146a | USP3     | USP3     | -        |
| hsa-miR-146a | USP47    | USP47    | -        |
| hsa-miR-146a | VAT1     | VAT1     | -        |
| hsa-miR-146a | -        | VDAC3    | VDAC3    |
| hsa-miR-146a | -        | VGLL2    | VGLL2    |
| hsa-miR-146a | -        | VIM      | VIM      |
| hsa-miR-146a | -        | VPS54    | VPS54    |
| hsa-miR-146a | -        | VSIG4    | VSIG4    |
| hsa-miR-146a | -        | VWCE     | VWCE     |
| hsa-miR-146a | -        | WAS      | WAS      |
| hsa-miR-146a | WASF3    | WASF3    | -        |
| hsa-miR-146a | -        | WDFY4    | WDFY4    |
| hsa-miR-146a | -        | WDR47    | WDR47    |
| hsa-miR-146a | -        | WNT3     | WNT3     |
| hsa-miR-146a | -        | WRNIP1   | WRNIP1   |
| hsa-miR-146a | WWC2     | WWC2     | -        |
| hsa-miR-146a | XIAP     | XIAP     | -        |
| hsa-miR-146a | -        | XRCC6BP1 | XRCC6BP1 |
| hsa-miR-146a | -        | YEATS4   | YEATS4   |
| hsa-miR-146a | ZC3H12B  | ZC3H12B  | -        |
| hsa-miR-146a | -        | ZC3H14   | ZC3H14   |
| hsa-miR-146a | ZC3H6    | ZC3H6    | -        |
| hsa-miR-146a | -        | ZDHHC13  | ZDHHC13  |
| hsa-miR-146a | -        | ZDHHC2   | ZDHHC2   |
| hsa-miR-146a | ZDHHC7   | ZDHHC7   | -        |
| hsa-miR-146a | -        | ZNF142   | ZNF142   |
| hsa-miR-146a | -        | ZNF143   | ZNF143   |
| hsa-miR-146a | ZNF148   | ZNF148   | -        |
| hsa-miR-146a | -        | ZNF160   | ZNF160   |
| hsa-miR-146a | -        | ZNF253   | ZNF253   |
| hsa-miR-146a | -        | ZNF32    | ZNF32    |

|               |         |           |           |
|---------------|---------|-----------|-----------|
| hsa-miR-146a  | -       | ZNF354B   | ZNF354B   |
| hsa-miR-146a  | -       | ZNF467    | ZNF467    |
| hsa-miR-146a  | ZNF512B | ZNF512B   | -         |
| hsa-miR-146a  | ZNF532  | ZNF532    | -         |
| hsa-miR-146a  | -       | ZNF540    | ZNF540    |
| hsa-miR-146a  | ZNRF3   | ZNRF3     | -         |
| hsa-miR-146a* | -       | ABCB1     | ABCB1     |
| hsa-miR-146a* | -       | ABHD3     | ABHD3     |
| hsa-miR-146a* | -       | AGXT2L2   | AGXT2L2   |
| hsa-miR-146a* | -       | AHSA1     | AHSA1     |
| hsa-miR-146a* | -       | AIM2      | AIM2      |
| hsa-miR-146a* | -       | ALAS1     | ALAS1     |
| hsa-miR-146a* | -       | ALPK1     | ALPK1     |
| hsa-miR-146a* | -       | ANKRD9    | ANKRD9    |
| hsa-miR-146a* | -       | ARHGEF10L | ARHGEF10L |
| hsa-miR-146a* | -       | ARHGEF5   | ARHGEF5   |
| hsa-miR-146a* | -       | ARID3A    | ARID3A    |
| hsa-miR-146a* | -       | ASB2      | ASB2      |
| hsa-miR-146a* | -       | ATE1      | ATE1      |
| hsa-miR-146a* | -       | ATG7      | ATG7      |
| hsa-miR-146a* | -       | ATP6V0B   | ATP6V0B   |
| hsa-miR-146a* | -       | ATP6V0E1  | ATP6V0E1  |
| hsa-miR-146a* | -       | ATP6V1H   | ATP6V1H   |
| hsa-miR-146a* | -       | ATP8A2    | ATP8A2    |
| hsa-miR-146a* | -       | ATP9A     | ATP9A     |
| hsa-miR-146a* | -       | BAG3      | BAG3      |
| hsa-miR-146a* | -       | BANK1     | BANK1     |
| hsa-miR-146a* | -       | BBS2      | BBS2      |
| hsa-miR-146a* | -       | BCCIP     | BCCIP     |
| hsa-miR-146a* | -       | BEST1     | BEST1     |
| hsa-miR-146a* | -       | BFAR      | BFAR      |
| hsa-miR-146a* | -       | BRD7      | BRD7      |
| hsa-miR-146a* | -       | BUD13     | BUD13     |
| hsa-miR-146a* | -       | C11orf48  | C11orf48  |
| hsa-miR-146a* | -       | C12orf48  | C12orf48  |
| hsa-miR-146a* | -       | C12orf51  | C12orf51  |
| hsa-miR-146a* | -       | C14orf142 | C14orf142 |
| hsa-miR-146a* | -       | C14orf149 | C14orf149 |
| hsa-miR-146a* | -       | C16orf53  | C16orf53  |
| hsa-miR-146a* | -       | C17orf75  | C17orf75  |
| hsa-miR-146a* | -       | C1orf120  | C1orf120  |
| hsa-miR-146a* | -       | C1orf50   | C1orf50   |
| hsa-miR-146a* | -       | C1orf57   | C1orf57   |
| hsa-miR-146a* | -       | C20orf134 | C20orf134 |
| hsa-miR-146a* | -       | C21orf62  | C21orf62  |
| hsa-miR-146a* | -       | C22orf23  | C22orf23  |
| hsa-miR-146a* | -       | C3orf10   | C3orf10   |
| hsa-miR-146a* | -       | C3orf37   | C3orf37   |
| hsa-miR-146a* | -       | C9orf102  | C9orf102  |
| hsa-miR-146a* | -       | C9orf103  | C9orf103  |
| hsa-miR-146a* | -       | CCDC134   | CCDC134   |

|               |   |         |         |
|---------------|---|---------|---------|
| hsa-miR-146a* | - | CCNK    | CCNK    |
| hsa-miR-146a* | - | CD38    | CD38    |
| hsa-miR-146a* | - | CDCA7   | CDCA7   |
| hsa-miR-146a* | - | CDH26   | CDH26   |
| hsa-miR-146a* | - | CHEK1   | CHEK1   |
| hsa-miR-146a* | - | CIC     | CIC     |
| hsa-miR-146a* | - | CKS1B   | CKS1B   |
| hsa-miR-146a* | - | CLEC2A  | CLEC2A  |
| hsa-miR-146a* | - | CLGN    | CLGN    |
| hsa-miR-146a* | - | CLINT1  | CLINT1  |
| hsa-miR-146a* | - | CLPX    | CLPX    |
| hsa-miR-146a* | - | CUTC    | CUTC    |
| hsa-miR-146a* | - | CXCR7   | CXCR7   |
| hsa-miR-146a* | - | CYB5R2  | CYB5R2  |
| hsa-miR-146a* | - | CYP2A13 | CYP2A13 |
| hsa-miR-146a* | - | CYP2C18 | CYP2C18 |
| hsa-miR-146a* | - | CYP4A11 | CYP4A11 |
| hsa-miR-146a* | - | CYP4A22 | CYP4A22 |
| hsa-miR-146a* | - | DAB2    | DAB2    |
| hsa-miR-146a* | - | DCUN1D5 | DCUN1D5 |
| hsa-miR-146a* | - | DERL2   | DERL2   |
| hsa-miR-146a* | - | DGKE    | DGKE    |
| hsa-miR-146a* | - | DIRC2   | DIRC2   |
| hsa-miR-146a* | - | DPAGT1  | DPAGT1  |
| hsa-miR-146a* | - | DUSP13  | DUSP13  |
| hsa-miR-146a* | - | EGFL8   | EGFL8   |
| hsa-miR-146a* | - | EHMT1   | EHMT1   |
| hsa-miR-146a* | - | ELN     | ELN     |
| hsa-miR-146a* | - | ELSPBP1 | ELSPBP1 |
| hsa-miR-146a* | - | EMD     | EMD     |
| hsa-miR-146a* | - | ETNK1   | ETNK1   |
| hsa-miR-146a* | - | FAM100A | FAM100A |
| hsa-miR-146a* | - | FAM107B | FAM107B |
| hsa-miR-146a* | - | FAM123B | FAM123B |
| hsa-miR-146a* | - | FAM82B  | FAM82B  |
| hsa-miR-146a* | - | FBXO32  | FBXO32  |
| hsa-miR-146a* | - | FBXO33  | FBXO33  |
| hsa-miR-146a* | - | FBXO9   | FBXO9   |
| hsa-miR-146a* | - | FCGR3A  | FCGR3A  |
| hsa-miR-146a* | - | FCGR3B  | FCGR3B  |
| hsa-miR-146a* | - | FCRL1   | FCRL1   |
| hsa-miR-146a* | - | FDFT1   | FDFT1   |
| hsa-miR-146a* | - | FGD2    | FGD2    |
| hsa-miR-146a* | - | FGFBP1  | FGFBP1  |
| hsa-miR-146a* | - | FGG     | FGG     |
| hsa-miR-146a* | - | FMR1NB  | FMR1NB  |
| hsa-miR-146a* | - | FOXD4L4 | FOXD4L4 |
| hsa-miR-146a* | - | FOXD4L5 | FOXD4L5 |
| hsa-miR-146a* | - | FRG1    | FRG1    |
| hsa-miR-146a* | - | G0S2    | G0S2    |
| hsa-miR-146a* | - | GFAP    | GFAP    |

|               |   |            |            |
|---------------|---|------------|------------|
| hsa-miR-146a* | - | GMEB2      | GMEB2      |
| hsa-miR-146a* | - | GPR110     | GPR110     |
| hsa-miR-146a* | - | GPR12      | GPR12      |
| hsa-miR-146a* | - | GPR176     | GPR176     |
| hsa-miR-146a* | - | GSN        | GSN        |
| hsa-miR-146a* | - | GUCY1B2    | GUCY1B2    |
| hsa-miR-146a* | - | GUF1       | GUF1       |
| hsa-miR-146a* | - | GYPE       | GYPE       |
| hsa-miR-146a* | - | HIBADH     | HIBADH     |
| hsa-miR-146a* | - | HIRIP3     | HIRIP3     |
| hsa-miR-146a* | - | HIST1H1E   | HIST1H1E   |
| hsa-miR-146a* | - | HIST1H2AC  | HIST1H2AC  |
| hsa-miR-146a* | - | HIST1H2AE  | HIST1H2AE  |
| hsa-miR-146a* | - | HIST1H2AL  | HIST1H2AL  |
| hsa-miR-146a* | - | HIST1H2BA  | HIST1H2BA  |
| hsa-miR-146a* | - | HIST1H2BE  | HIST1H2BE  |
| hsa-miR-146a* | - | HIST1H2BL  | HIST1H2BL  |
| hsa-miR-146a* | - | HIST1H3A   | HIST1H3A   |
| hsa-miR-146a* | - | HIST1H3H   | HIST1H3H   |
| hsa-miR-146a* | - | HIST2H2AA3 | HIST2H2AA3 |
| hsa-miR-146a* | - | HIST2H2BF  | HIST2H2BF  |
| hsa-miR-146a* | - | HLA-DMB    | HLA-DMB    |
| hsa-miR-146a* | - | HMOX1      | HMOX1      |
| hsa-miR-146a* | - | HOXC4      | HOXC4      |
| hsa-miR-146a* | - | HOXD3      | HOXD3      |
| hsa-miR-146a* | - | HSH2D      | HSH2D      |
| hsa-miR-146a* | - | HSPA14     | HSPA14     |
| hsa-miR-146a* | - | HSPA6      | HSPA6      |
| hsa-miR-146a* | - | HTATSF1    | HTATSF1    |
| hsa-miR-146a* | - | ID2        | ID2        |
| hsa-miR-146a* | - | IDI2       | IDI2       |
| hsa-miR-146a* | - | IGFL3      | IGFL3      |
| hsa-miR-146a* | - | IGHMBP2    | IGHMBP2    |
| hsa-miR-146a* | - | IL24       | IL24       |
| hsa-miR-146a* | - | IL5        | IL5        |
| hsa-miR-146a* | - | IL6        | IL6        |
| hsa-miR-146a* | - | ING4       | ING4       |
| hsa-miR-146a* | - | IRX4       | IRX4       |
| hsa-miR-146a* | - | ITGB7      | ITGB7      |
| hsa-miR-146a* | - | ITPKC      | ITPKC      |
| hsa-miR-146a* | - | JAKMIP1    | JAKMIP1    |
| hsa-miR-146a* | - | KIAA1324   | KIAA1324   |
| hsa-miR-146a* | - | KLHL5      | KLHL5      |
| hsa-miR-146a* | - | KREMEN1    | KREMEN1    |
| hsa-miR-146a* | - | KRT15      | KRT15      |
| hsa-miR-146a* | - | KRT18      | KRT18      |
| hsa-miR-146a* | - | LAT2       | LAT2       |
| hsa-miR-146a* | - | LCT        | LCT        |
| hsa-miR-146a* | - | LIG3       | LIG3       |
| hsa-miR-146a* | - | LILRA1     | LILRA1     |
| hsa-miR-146a* | - | LRRC28     | LRRC28     |

|               |   |         |         |
|---------------|---|---------|---------|
| hsa-miR-146a* | - | LRRC49  | LRRC49  |
| hsa-miR-146a* | - | LY6K    | LY6K    |
| hsa-miR-146a* | - | LYN     | LYN     |
| hsa-miR-146a* | - | LZTFL1  | LZTFL1  |
| hsa-miR-146a* | - | MAGEC2  | MAGEC2  |
| hsa-miR-146a* | - | MANBA   | MANBA   |
| hsa-miR-146a* | - | MCOLN2  | MCOLN2  |
| hsa-miR-146a* | - | MEFV    | MEFV    |
| hsa-miR-146a* | - | MKL2    | MKL2    |
| hsa-miR-146a* | - | MNAT1   | MNAT1   |
| hsa-miR-146a* | - | MORF4L1 | MORF4L1 |
| hsa-miR-146a* | - | MORF4L2 | MORF4L2 |
| hsa-miR-146a* | - | MRPL45  | MRPL45  |
| hsa-miR-146a* | - | MSH5    | MSH5    |
| hsa-miR-146a* | - | MST1R   | MST1R   |
| hsa-miR-146a* | - | MTERF   | MTERF   |
| hsa-miR-146a* | - | MTF2    | MTF2    |
| hsa-miR-146a* | - | MXI1    | MXI1    |
| hsa-miR-146a* | - | NCOA3   | NCOA3   |
| hsa-miR-146a* | - | NDEL1   | NDEL1   |
| hsa-miR-146a* | - | NDFIP2  | NDFIP2  |
| hsa-miR-146a* | - | NEK2    | NEK2    |
| hsa-miR-146a* | - | NEU1    | NEU1    |
| hsa-miR-146a* | - | NFASC   | NFASC   |
| hsa-miR-146a* | - | NHLH2   | NHLH2   |
| hsa-miR-146a* | - | NLRP9   | NLRP9   |
| hsa-miR-146a* | - | NNT     | NNT     |
| hsa-miR-146a* | - | NOL8    | NOL8    |
| hsa-miR-146a* | - | NR4A3   | NR4A3   |
| hsa-miR-146a* | - | NRP2    | NRP2    |
| hsa-miR-146a* | - | NSUN7   | NSUN7   |
| hsa-miR-146a* | - | ODF2L   | ODF2L   |
| hsa-miR-146a* | - | OXA1L   | OXA1L   |
| hsa-miR-146a* | - | PASD1   | PASD1   |
| hsa-miR-146a* | - | PBX3    | PBX3    |
| hsa-miR-146a* | - | PCDH19  | PCDH19  |
| hsa-miR-146a* | - | PCDH20  | PCDH20  |
| hsa-miR-146a* | - | PCDHB10 | PCDHB10 |
| hsa-miR-146a* | - | PCM1    | PCM1    |
| hsa-miR-146a* | - | PCP4L1  | PCP4L1  |
| hsa-miR-146a* | - | PCSK5   | PCSK5   |
| hsa-miR-146a* | - | PDCD11  | PDCD11  |
| hsa-miR-146a* | - | PDE4DIP | PDE4DIP |
| hsa-miR-146a* | - | PEX11B  | PEX11B  |
| hsa-miR-146a* | - | PGS1    | PGS1    |
| hsa-miR-146a* | - | PHF12   | PHF12   |
| hsa-miR-146a* | - | PIAS3   | PIAS3   |
| hsa-miR-146a* | - | PIK3C3  | PIK3C3  |
| hsa-miR-146a* | - | PIP5K1B | PIP5K1B |
| hsa-miR-146a* | - | PKD2L1  | PKD2L1  |
| hsa-miR-146a* | - | PLCD4   | PLCD4   |



|               |   |          |          |
|---------------|---|----------|----------|
| hsa-miR-146a* | - | PLP2     | PLP2     |
| hsa-miR-146a* | - | PNPLA1   | PNPLA1   |
| hsa-miR-146a* | - | POMT1    | POMT1    |
| hsa-miR-146a* | - | PRSS12   | PRSS12   |
| hsa-miR-146a* | - | PTPDC1   | PTPDC1   |
| hsa-miR-146a* | - | RAB34    | RAB34    |
| hsa-miR-146a* | - | RANBP17  | RANBP17  |
| hsa-miR-146a* | - | RAP1GAP  | RAP1GAP  |
| hsa-miR-146a* | - | RAPH1    | RAPH1    |
| hsa-miR-146a* | - | RBL1     | RBL1     |
| hsa-miR-146a* | - | RECQL    | RECQL    |
| hsa-miR-146a* | - | REG4     | REG4     |
| hsa-miR-146a* | - | RELB     | RELB     |
| hsa-miR-146a* | - | RFPL4B   | RFPL4B   |
| hsa-miR-146a* | - | RHCE     | RHCE     |
| hsa-miR-146a* | - | RNF175   | RNF175   |
| hsa-miR-146a* | - | ROR2     | ROR2     |
| hsa-miR-146a* | - | RPS29    | RPS29    |
| hsa-miR-146a* | - | RRS1     | RRS1     |
| hsa-miR-146a* | - | SAT2     | SAT2     |
| hsa-miR-146a* | - | SCARA5   | SCARA5   |
| hsa-miR-146a* | - | SCLT1    | SCLT1    |
| hsa-miR-146a* | - | SCO1     | SCO1     |
| hsa-miR-146a* | - | SCRN2    | SCRN2    |
| hsa-miR-146a* | - | SERBP1   | SERBP1   |
| hsa-miR-146a* | - | SFRP5    | SFRP5    |
| hsa-miR-146a* | - | SH3GLB1  | SH3GLB1  |
| hsa-miR-146a* | - | SIDT2    | SIDT2    |
| hsa-miR-146a* | - | SIGLEC11 | SIGLEC11 |
| hsa-miR-146a* | - | SLC31A1  | SLC31A1  |
| hsa-miR-146a* | - | SLC7A13  | SLC7A13  |
| hsa-miR-146a* | - | SMC1B    | SMC1B    |
| hsa-miR-146a* | - | SNAP91   | SNAP91   |
| hsa-miR-146a* | - | SNAPC3   | SNAPC3   |
| hsa-miR-146a* | - | SOD1     | SOD1     |
| hsa-miR-146a* | - | SORBS1   | SORBS1   |
| hsa-miR-146a* | - | SPEN     | SPEN     |
| hsa-miR-146a* | - | SPINK7   | SPINK7   |
| hsa-miR-146a* | - | SRP19    | SRP19    |
| hsa-miR-146a* | - | SRPK1    | SRPK1    |
| hsa-miR-146a* | - | STOX2    | STOX2    |
| hsa-miR-146a* | - | SULT2A1  | SULT2A1  |
| hsa-miR-146a* | - | TAF11    | TAF11    |
| hsa-miR-146a* | - | TANC2    | TANC2    |
| hsa-miR-146a* | - | TARSL2   | TARSL2   |
| hsa-miR-146a* | - | TBC1D3   | TBC1D3   |
| hsa-miR-146a* | - | TBC1D3B  | TBC1D3B  |
| hsa-miR-146a* | - | TBC1D3C  | TBC1D3C  |
| hsa-miR-146a* | - | TBC1D3G  | TBC1D3G  |
| hsa-miR-146a* | - | TEAD4    | TEAD4    |
| hsa-miR-146a* | - | TENC1    | TENC1    |

|               |           |           |          |
|---------------|-----------|-----------|----------|
| hsa-miR-146a* | -         | THSD7A    | THSD7A   |
| hsa-miR-146a* | -         | TJAP1     | TJAP1    |
| hsa-miR-146a* | -         | TMEFF1    | TMEFF1   |
| hsa-miR-146a* | -         | TMEM177   | TMEM177  |
| hsa-miR-146a* | -         | TMEM87A   | TMEM87A  |
| hsa-miR-146a* | -         | TMPRSS5   | TMPRSS5  |
| hsa-miR-146a* | -         | TNKS      | TNKS     |
| hsa-miR-146a* | -         | TOPBP1    | TOPBP1   |
| hsa-miR-146a* | -         | TRAF3IP1  | TRAF3IP1 |
| hsa-miR-146a* | -         | TRAF6     | TRAF6    |
| hsa-miR-146a* | -         | TRIM69    | TRIM69   |
| hsa-miR-146a* | -         | TRPM4     | TRPM4    |
| hsa-miR-146a* | -         | TTC25     | TTC25    |
| hsa-miR-146a* | -         | TTLL6     | TTLL6    |
| hsa-miR-146a* | -         | UAP1      | UAP1     |
| hsa-miR-146a* | -         | UBE2U     | UBE2U    |
| hsa-miR-146a* | -         | UGT1A1    | UGT1A1   |
| hsa-miR-146a* | -         | UGT2B28   | UGT2B28  |
| hsa-miR-146a* | -         | ULK2      | ULK2     |
| hsa-miR-146a* | -         | UROD      | UROD     |
| hsa-miR-146a* | -         | USP48     | USP48    |
| hsa-miR-146a* | -         | VAV3      | VAV3     |
| hsa-miR-146a* | -         | VNN2      | VNN2     |
| hsa-miR-146a* | -         | WAC       | WAC      |
| hsa-miR-146a* | -         | YIPF2     | YIPF2    |
| hsa-miR-146a* | -         | YME1L1    | YME1L1   |
| hsa-miR-146a* | -         | ZMYM2     | ZMYM2    |
| hsa-miR-146a* | -         | ZNF182    | ZNF182   |
| hsa-miR-146a* | -         | ZNF35     | ZNF35    |
| hsa-miR-146a* | -         | ZNF451    | ZNF451   |
| hsa-miR-146a* | -         | ZNF667    | ZNF667   |
| hsa-miR-146a* | -         | ZNF678    | ZNF678   |
| hsa-miR-146a* | -         | ZNF77     | ZNF77    |
| hsa-miR-1537  | ACADL     | ACADL     | -        |
| hsa-miR-1537  | ADAM10    | ADAM10    | -        |
| hsa-miR-1537  | ADAMTSL4  | ADAMTSL4  | -        |
| hsa-miR-1537  | ADCY7     | ADCY7     | -        |
| hsa-miR-1537  | ADH5      | ADH5      | -        |
| hsa-miR-1537  | ADRA1A    | ADRA1A    | -        |
| hsa-miR-1537  | AEBP2     | AEBP2     | -        |
| hsa-miR-1537  | AKTIP     | AKTIP     | -        |
| hsa-miR-1537  | ANKRD18A  | ANKRD18A  | -        |
| hsa-miR-1537  | ANKS1B    | ANKS1B    | -        |
| hsa-miR-1537  | ARF3      | ARF3      | -        |
| hsa-miR-1537  | ARHGAP11A | ARHGAP11A | -        |
| hsa-miR-1537  | ARHGEF3   | ARHGEF3   | -        |
| hsa-miR-1537  | ARHGEF7   | ARHGEF7   | -        |
| hsa-miR-1537  | ARL3      | ARL3      | -        |
| hsa-miR-1537  | ARMCX3    | ARMCX3    | -        |
| hsa-miR-1537  | ARPP19    | ARPP19    | -        |
| hsa-miR-1537  | ASTN2     | ASTN2     | -        |

|              |           |           |   |
|--------------|-----------|-----------|---|
| hsa-miR-1537 | ATF2      | ATF2      | - |
| hsa-miR-1537 | ATF7      | ATF7      | - |
| hsa-miR-1537 | ATP10B    | ATP10B    | - |
| hsa-miR-1537 | ATP11C    | ATP11C    | - |
| hsa-miR-1537 | BAGE      | BAGE      | - |
| hsa-miR-1537 | BAK1      | BAK1      | - |
| hsa-miR-1537 | BARD1     | BARD1     | - |
| hsa-miR-1537 | BBS5      | BBS5      | - |
| hsa-miR-1537 | BCCIP     | BCCIP     | - |
| hsa-miR-1537 | BMP7      | BMP7      | - |
| hsa-miR-1537 | C10orf18  | C10orf18  | - |
| hsa-miR-1537 | C11orf30  | C11orf30  | - |
| hsa-miR-1537 | C12orf73  | C12orf73  | - |
| hsa-miR-1537 | C13orf18  | C13orf18  | - |
| hsa-miR-1537 | C16orf80  | C16orf80  | - |
| hsa-miR-1537 | C17orf81  | C17orf81  | - |
| hsa-miR-1537 | C1orf144  | C1orf144  | - |
| hsa-miR-1537 | C20orf160 | C20orf160 | - |
| hsa-miR-1537 | C20orf46  | C20orf46  | - |
| hsa-miR-1537 | C5orf4    | C5orf4    | - |
| hsa-miR-1537 | C5orf51   | C5orf51   | - |
| hsa-miR-1537 | C6orf170  | C6orf170  | - |
| hsa-miR-1537 | CAB39     | CAB39     | - |
| hsa-miR-1537 | CAPN2     | CAPN2     | - |
| hsa-miR-1537 | CD8B      | CD8B      | - |
| hsa-miR-1537 | CDH13     | CDH13     | - |
| hsa-miR-1537 | CDKN2B    | CDKN2B    | - |
| hsa-miR-1537 | CERK      | CERK      | - |
| hsa-miR-1537 | CFTR      | CFTR      | - |
| hsa-miR-1537 | CHRFAM7A  | CHRFAM7A  | - |
| hsa-miR-1537 | CHRNA7    | CHRNA7    | - |
| hsa-miR-1537 | CLIP2     | CLIP2     | - |
| hsa-miR-1537 | CLNK      | CLNK      | - |
| hsa-miR-1537 | CLYBL     | CLYBL     | - |
| hsa-miR-1537 | CMKLR1    | CMKLR1    | - |
| hsa-miR-1537 | COL5A1    | COL5A1    | - |
| hsa-miR-1537 | CPD       | CPD       | - |
| hsa-miR-1537 | CPSF7     | CPSF7     | - |
| hsa-miR-1537 | CRABP1    | CRABP1    | - |
| hsa-miR-1537 | CRIP2     | CRIP2     | - |
| hsa-miR-1537 | CSE1L     | CSE1L     | - |
| hsa-miR-1537 | CTAGE5    | CTAGE5    | - |
| hsa-miR-1537 | CTNNBIP1  | CTNNBIP1  | - |
| hsa-miR-1537 | CXCR2     | CXCR2     | - |
| hsa-miR-1537 | CYP27B1   | CYP27B1   | - |
| hsa-miR-1537 | DAG1      | DAG1      | - |
| hsa-miR-1537 | DBX2      | DBX2      | - |
| hsa-miR-1537 | DDX3Y     | DDX3Y     | - |
| hsa-miR-1537 | DENND4C   | DENND4C   | - |
| hsa-miR-1537 | DGCR14    | DGCR14    | - |
| hsa-miR-1537 | DIRC1     | DIRC1     | - |

|              |          |          |   |
|--------------|----------|----------|---|
| hsa-miR-1537 | DISC1    | DISC1    | - |
| hsa-miR-1537 | DNAJC24  | DNAJC24  | - |
| hsa-miR-1537 | DOCK10   | DOCK10   | - |
| hsa-miR-1537 | DPP8     | DPP8     | - |
| hsa-miR-1537 | DTNA     | DTNA     | - |
| hsa-miR-1537 | DTNBP1   | DTNBP1   | - |
| hsa-miR-1537 | EHF      | EHF      | - |
| hsa-miR-1537 | EIF2AK3  | EIF2AK3  | - |
| hsa-miR-1537 | EIF2B1   | EIF2B1   | - |
| hsa-miR-1537 | ELK1     | ELK1     | - |
| hsa-miR-1537 | EPHB2    | EPHB2    | - |
| hsa-miR-1537 | ERAP1    | ERAP1    | - |
| hsa-miR-1537 | EREG     | EREG     | - |
| hsa-miR-1537 | ETV1     | ETV1     | - |
| hsa-miR-1537 | EVL      | EVL      | - |
| hsa-miR-1537 | EZH1     | EZH1     | - |
| hsa-miR-1537 | FAM75C1  | FAM75C1  | - |
| hsa-miR-1537 | FARP1    | FARP1    | - |
| hsa-miR-1537 | FBLN5    | FBLN5    | - |
| hsa-miR-1537 | FBXL19   | FBXL19   | - |
| hsa-miR-1537 | FCN2     | FCN2     | - |
| hsa-miR-1537 | FDFT1    | FDFT1    | - |
| hsa-miR-1537 | FGF9     | FGF9     | - |
| hsa-miR-1537 | FHOD3    | FHOD3    | - |
| hsa-miR-1537 | FNTA     | FNTA     | - |
| hsa-miR-1537 | FZD8     | FZD8     | - |
| hsa-miR-1537 | GADL1    | GADL1    | - |
| hsa-miR-1537 | GDI2     | GDI2     | - |
| hsa-miR-1537 | GIT2     | GIT2     | - |
| hsa-miR-1537 | GLTSCR1  | GLTSCR1  | - |
| hsa-miR-1537 | GNAO1    | GNAO1    | - |
| hsa-miR-1537 | GNAQ     | GNAQ     | - |
| hsa-miR-1537 | GRHL1    | GRHL1    | - |
| hsa-miR-1537 | GRM1     | GRM1     | - |
| hsa-miR-1537 | GRPR     | GRPR     | - |
| hsa-miR-1537 | GRSF1    | GRSF1    | - |
| hsa-miR-1537 | HAND2    | HAND2    | - |
| hsa-miR-1537 | HDGFRP3  | HDGFRP3  | - |
| hsa-miR-1537 | HLA-DOA  | HLA-DOA  | - |
| hsa-miR-1537 | HLX      | HLX      | - |
| hsa-miR-1537 | HMGB1    | HMGB1    | - |
| hsa-miR-1537 | HSD17B12 | HSD17B12 | - |
| hsa-miR-1537 | IGSF21   | IGSF21   | - |
| hsa-miR-1537 | IKBKB    | IKBKB    | - |
| hsa-miR-1537 | IL28RA   | IL28RA   | - |
| hsa-miR-1537 | IL6R     | IL6R     | - |
| hsa-miR-1537 | INPP4A   | INPP4A   | - |
| hsa-miR-1537 | INPP5B   | INPP5B   | - |
| hsa-miR-1537 | KCNJ8    | KCNJ8    | - |
| hsa-miR-1537 | KCTD10   | KCTD10   | - |
| hsa-miR-1537 | KIAA0319 | KIAA0319 | - |

|              |              |              |   |
|--------------|--------------|--------------|---|
| hsa-miR-1537 | KIAA0408     | KIAA0408     | - |
| hsa-miR-1537 | KIAA1199     | KIAA1199     | - |
| hsa-miR-1537 | KIF24        | KIF24        | - |
| hsa-miR-1537 | KLC2         | KLC2         | - |
| hsa-miR-1537 | KLF11        | KLF11        | - |
| hsa-miR-1537 | KLF8         | KLF8         | - |
| hsa-miR-1537 | KLHL28       | KLHL28       | - |
| hsa-miR-1537 | KLRD1        | KLRD1        | - |
| hsa-miR-1537 | LDB2         | LDB2         | - |
| hsa-miR-1537 | LOC100329135 | LOC100329135 | - |
| hsa-miR-1537 | LOC400950    | LOC400950    | - |
| hsa-miR-1537 | LPHN2        | LPHN2        | - |
| hsa-miR-1537 | LPHN3        | LPHN3        | - |
| hsa-miR-1537 | LPP          | LPP          | - |
| hsa-miR-1537 | LRP12        | LRP12        | - |
| hsa-miR-1537 | LRP1B        | LRP1B        | - |
| hsa-miR-1537 | LRRC47       | LRRC47       | - |
| hsa-miR-1537 | LRRN1        | LRRN1        | - |
| hsa-miR-1537 | LRRTM3       | LRRTM3       | - |
| hsa-miR-1537 | LRTOMT       | LRTOMT       | - |
| hsa-miR-1537 | LSG1         | LSG1         | - |
| hsa-miR-1537 | LSS          | LSS          | - |
| hsa-miR-1537 | LUZP2        | LUZP2        | - |
| hsa-miR-1537 | MAGEB6       | MAGEB6       | - |
| hsa-miR-1537 | MANBAL       | MANBAL       | - |
| hsa-miR-1537 | MAP3K1       | MAP3K1       | - |
| hsa-miR-1537 | MARK4        | MARK4        | - |
| hsa-miR-1537 | MEF2A        | MEF2A        | - |
| hsa-miR-1537 | MEOX2        | MEOX2        | - |
| hsa-miR-1537 | MEX3C        | MEX3C        | - |
| hsa-miR-1537 | MIF          | MIF          | - |
| hsa-miR-1537 | MITF         | MITF         | - |
| hsa-miR-1537 | MMP16        | MMP16        | - |
| hsa-miR-1537 | MORF4L2      | MORF4L2      | - |
| hsa-miR-1537 | MYOG         | MYOG         | - |
| hsa-miR-1537 | N4BP2L2      | N4BP2L2      | - |
| hsa-miR-1537 | NFIB         | NFIB         | - |
| hsa-miR-1537 | NKRF         | NKRF         | - |
| hsa-miR-1537 | NSMAF        | NSMAF        | - |
| hsa-miR-1537 | OTUD7B       | OTUD7B       | - |
| hsa-miR-1537 | OXCT1        | OXCT1        | - |
| hsa-miR-1537 | OXTR         | OXTR         | - |
| hsa-miR-1537 | PANX1        | PANX1        | - |
| hsa-miR-1537 | PCBD2        | PCBD2        | - |
| hsa-miR-1537 | PCDH12       | PCDH12       | - |
| hsa-miR-1537 | PDE8A        | PDE8A        | - |
| hsa-miR-1537 | PDZRN3       | PDZRN3       | - |
| hsa-miR-1537 | PHF17        | PHF17        | - |
| hsa-miR-1537 | PHLPP2       | PHLPP2       | - |
| hsa-miR-1537 | PITPNB       | PITPNB       | - |
| hsa-miR-1537 | PKD1         | PKD1         | - |

|              |           |           |   |
|--------------|-----------|-----------|---|
| hsa-miR-1537 | PLEKHG2   | PLEKHG2   | - |
| hsa-miR-1537 | PMAIP1    | PMAIP1    | - |
| hsa-miR-1537 | PMP22     | PMP22     | - |
| hsa-miR-1537 | POFUT2    | POFUT2    | - |
| hsa-miR-1537 | POU3F1    | POU3F1    | - |
| hsa-miR-1537 | PPP1R3A   | PPP1R3A   | - |
| hsa-miR-1537 | PRDM2     | PRDM2     | - |
| hsa-miR-1537 | PRDM6     | PRDM6     | - |
| hsa-miR-1537 | PRDX4     | PRDX4     | - |
| hsa-miR-1537 | PRPF38A   | PRPF38A   | - |
| hsa-miR-1537 | PRPF4B    | PRPF4B    | - |
| hsa-miR-1537 | PRR12     | PRR12     | - |
| hsa-miR-1537 | PTGES2    | PTGES2    | - |
| hsa-miR-1537 | PTPRE     | PTPRE     | - |
| hsa-miR-1537 | PTTG1IP   | PTTG1IP   | - |
| hsa-miR-1537 | QKI       | QKI       | - |
| hsa-miR-1537 | RAB11A    | RAB11A    | - |
| hsa-miR-1537 | RAB14     | RAB14     | - |
| hsa-miR-1537 | RAB4A     | RAB4A     | - |
| hsa-miR-1537 | RASD2     | RASD2     | - |
| hsa-miR-1537 | RASGEF1A  | RASGEF1A  | - |
| hsa-miR-1537 | RIMBP2    | RIMBP2    | - |
| hsa-miR-1537 | RPL13     | RPL13     | - |
| hsa-miR-1537 | RPL26L1   | RPL26L1   | - |
| hsa-miR-1537 | RPRM      | RPRM      | - |
| hsa-miR-1537 | RRAGD     | RRAGD     | - |
| hsa-miR-1537 | RRN3      | RRN3      | - |
| hsa-miR-1537 | SAMD4B    | SAMD4B    | - |
| hsa-miR-1537 | SCN5A     | SCN5A     | - |
| hsa-miR-1537 | SEC16A    | SEC16A    | - |
| hsa-miR-1537 | SEC22C    | SEC22C    | - |
| hsa-miR-1537 | SECISBP2L | SECISBP2L | - |
| hsa-miR-1537 | SETD1B    | SETD1B    | - |
| hsa-miR-1537 | SIPA1L3   | SIPA1L3   | - |
| hsa-miR-1537 | SLC23A3   | SLC23A3   | - |
| hsa-miR-1537 | SLC26A2   | SLC26A2   | - |
| hsa-miR-1537 | SLC6A20   | SLC6A20   | - |
| hsa-miR-1537 | SLC7A2    | SLC7A2    | - |
| hsa-miR-1537 | SLU7      | SLU7      | - |
| hsa-miR-1537 | SMARCA2   | SMARCA2   | - |
| hsa-miR-1537 | SMEK2     | SMEK2     | - |
| hsa-miR-1537 | SNIP1     | SNIP1     | - |
| hsa-miR-1537 | SNX18     | SNX18     | - |
| hsa-miR-1537 | SOBP      | SOBP      | - |
| hsa-miR-1537 | SOX21     | SOX21     | - |
| hsa-miR-1537 | SPC25     | SPC25     | - |
| hsa-miR-1537 | SPPL3     | SPPL3     | - |
| hsa-miR-1537 | SPSB1     | SPSB1     | - |
| hsa-miR-1537 | SSU72     | SSU72     | - |
| hsa-miR-1537 | ST18      | ST18      | - |
| hsa-miR-1537 | STAU2     | STAU2     | - |

|              |         |         |   |
|--------------|---------|---------|---|
| hsa-miR-1537 | STIM2   | STIM2   | - |
| hsa-miR-1537 | STK4    | STK4    | - |
| hsa-miR-1537 | STRADA  | STRADA  | - |
| hsa-miR-1537 | STX4    | STX4    | - |
| hsa-miR-1537 | SWAP70  | SWAP70  | - |
| hsa-miR-1537 | TARP    | TARP    | - |
| hsa-miR-1537 | TBX1    | TBX1    | - |
| hsa-miR-1537 | TBX18   | TBX18   | - |
| hsa-miR-1537 | TEAD2   | TEAD2   | - |
| hsa-miR-1537 | TGM2    | TGM2    | - |
| hsa-miR-1537 | TIAM1   | TIAM1   | - |
| hsa-miR-1537 | TMCC2   | TMCC2   | - |
| hsa-miR-1537 | TMED2   | TMED2   | - |
| hsa-miR-1537 | TMEM213 | TMEM213 | - |
| hsa-miR-1537 | TNFSF15 | TNFSF15 | - |
| hsa-miR-1537 | TNKS2   | TNKS2   | - |
| hsa-miR-1537 | TNPO1   | TNPO1   | - |
| hsa-miR-1537 | TOP2B   | TOP2B   | - |
| hsa-miR-1537 | TPCN1   | TPCN1   | - |
| hsa-miR-1537 | TRAK1   | TRAK1   | - |
| hsa-miR-1537 | TRAM1   | TRAM1   | - |
| hsa-miR-1537 | TRIM14  | TRIM14  | - |
| hsa-miR-1537 | TRIP13  | TRIP13  | - |
| hsa-miR-1537 | TRMT11  | TRMT11  | - |
| hsa-miR-1537 | TRPM6   | TRPM6   | - |
| hsa-miR-1537 | TSC1    | TSC1    | - |
| hsa-miR-1537 | TUBB3   | TUBB3   | - |
| hsa-miR-1537 | UACA    | UACA    | - |
| hsa-miR-1537 | UBE2QL1 | UBE2QL1 | - |
| hsa-miR-1537 | UBXN4   | UBXN4   | - |
| hsa-miR-1537 | UBXN7   | UBXN7   | - |
| hsa-miR-1537 | UCK1    | UCK1    | - |
| hsa-miR-1537 | UNC5C   | UNC5C   | - |
| hsa-miR-1537 | UPF3A   | UPF3A   | - |
| hsa-miR-1537 | USP37   | USP37   | - |
| hsa-miR-1537 | WDR47   | WDR47   | - |
| hsa-miR-1537 | WDR5B   | WDR5B   | - |
| hsa-miR-1537 | WDR77   | WDR77   | - |
| hsa-miR-1537 | WIPF1   | WIPF1   | - |
| hsa-miR-1537 | WNT5B   | WNT5B   | - |
| hsa-miR-1537 | YBX1    | YBX1    | - |
| hsa-miR-1537 | YTHDF3  | YTHDF3  | - |
| hsa-miR-1537 | ZBTB6   | ZBTB6   | - |
| hsa-miR-1537 | ZCCHC24 | ZCCHC24 | - |
| hsa-miR-1537 | ZNF398  | ZNF398  | - |
| hsa-miR-1537 | ZNF460  | ZNF460  | - |
| hsa-miR-1537 | ZNF474  | ZNF474  | - |
| hsa-miR-1537 | ZNF644  | ZNF644  | - |
| hsa-miR-1537 | ZNF654  | ZNF654  | - |
| hsa-miR-1537 | ZNF714  | ZNF714  | - |
| hsa-miR-1537 | ZNF75A  | ZNF75A  | - |

|             |          |          |          |
|-------------|----------|----------|----------|
| hsa-miR-154 | ABI1     | ABI1     | -        |
| hsa-miR-154 | ADNP     | ADNP     | -        |
| hsa-miR-154 | -        | AHNAK    | AHNAK    |
| hsa-miR-154 | ANK3     | ANK3     | -        |
| hsa-miR-154 | ANP32A   | ANP32A   | -        |
| hsa-miR-154 | -        | AOAH     | AOAH     |
| hsa-miR-154 | AP3M1    | -        | AP3M1    |
| hsa-miR-154 | -        | APH1B    | APH1B    |
| hsa-miR-154 | AQP9     | AQP9     | -        |
| hsa-miR-154 | -        | ARG2     | ARG2     |
| hsa-miR-154 | -        | ARMC8    | ARMC8    |
| hsa-miR-154 | -        | ATP6V0C  | ATP6V0C  |
| hsa-miR-154 | -        | AURKA    | AURKA    |
| hsa-miR-154 | BAG5     | BAG5     | -        |
| hsa-miR-154 | -        | BAZ1A    | BAZ1A    |
| hsa-miR-154 | -        | BBS2     | BBS2     |
| hsa-miR-154 | BBS7     | BBS7     | -        |
| hsa-miR-154 | -        | BCL2L13  | BCL2L13  |
| hsa-miR-154 | -        | BIVM     | BIVM     |
| hsa-miR-154 | -        | BMPR1B   | BMPR1B   |
| hsa-miR-154 | -        | BOLL     | BOLL     |
| hsa-miR-154 | -        | BTBD8    | BTBD8    |
| hsa-miR-154 | -        | BTC      | BTC      |
| hsa-miR-154 | -        | BTF3     | BTF3     |
| hsa-miR-154 | -        | C10orf47 | C10orf47 |
| hsa-miR-154 | C12orf51 | C12orf51 | -        |
| hsa-miR-154 | -        | C17orf50 | C17orf50 |
| hsa-miR-154 | -        | C1orf105 | C1orf105 |
| hsa-miR-154 | -        | C1orf77  | C1orf77  |
| hsa-miR-154 | -        | C6orf182 | C6orf182 |
| hsa-miR-154 | -        | C7orf25  | C7orf25  |
| hsa-miR-154 | -        | CA2      | CA2      |
| hsa-miR-154 | -        | CABP7    | CABP7    |
| hsa-miR-154 | CAMK2G   | CAMK2G   | -        |
| hsa-miR-154 | CAPN6    | CAPN6    | -        |
| hsa-miR-154 | -        | CASC4    | CASC4    |
| hsa-miR-154 | -        | CATSPER2 | CATSPER2 |
| hsa-miR-154 | -        | CBS      | CBS      |
| hsa-miR-154 | -        | CCBL1    | CCBL1    |
| hsa-miR-154 | -        | CCDC127  | CCDC127  |
| hsa-miR-154 | CCND2    | CCND2    | -        |
| hsa-miR-154 | -        | CDKN2C   | CDKN2C   |
| hsa-miR-154 | -        | CEACAM1  | CEACAM1  |
| hsa-miR-154 | -        | CENPL    | CENPL    |
| hsa-miR-154 | -        | CEP76    | CEP76    |
| hsa-miR-154 | CHM      | CHM      | -        |
| hsa-miR-154 | -        | CILP     | CILP     |
| hsa-miR-154 | -        | CLDN22   | CLDN22   |
| hsa-miR-154 | -        | CLOCK    | CLOCK    |
| hsa-miR-154 | CNOT4    | CNOT4    | -        |
| hsa-miR-154 | -        | COL14A1  | COL14A1  |



|             |         |         |         |
|-------------|---------|---------|---------|
| hsa-miR-154 | -       | COQ9    | COQ9    |
| hsa-miR-154 | CPEB3   | CPEB3   | -       |
| hsa-miR-154 | -       | CRYL1   | CRYL1   |
| hsa-miR-154 | -       | CSF2RA  | CSF2RA  |
| hsa-miR-154 | -       | CSNK1A1 | CSNK1A1 |
| hsa-miR-154 | CTDSPL2 | CTDSPL2 | -       |
| hsa-miR-154 | -       | CTTNBP2 | CTTNBP2 |
| hsa-miR-154 | -       | DAZ2    | DAZ2    |
| hsa-miR-154 | DCAF16  | DCAF16  | -       |
| hsa-miR-154 | -       | DCLRE1C | DCLRE1C |
| hsa-miR-154 | -       | DLEU2L  | DLEU2L  |
| hsa-miR-154 | -       | DMGDH   | DMGDH   |
| hsa-miR-154 | DMXL1   | DMXL1   | -       |
| hsa-miR-154 | DNAL1   | DNAL1   | -       |
| hsa-miR-154 | -       | DNASE2B | DNASE2B |
| hsa-miR-154 | DOCK1   | DOCK1   | -       |
| hsa-miR-154 | -       | DPPA2   | DPPA2   |
| hsa-miR-154 | DRP2    | DRP2    | -       |
| hsa-miR-154 | -       | DUSP28  | DUSP28  |
| hsa-miR-154 | DYRK1A  | DYRK1A  | -       |
| hsa-miR-154 | E2F5    | E2F5    | -       |
| hsa-miR-154 | ECE1    | ECE1    | -       |
| hsa-miR-154 | -       | ELK3    | ELK3    |
| hsa-miR-154 | -       | ENPP5   | ENPP5   |
| hsa-miR-154 | -       | ESAM    | ESAM    |
| hsa-miR-154 | EVI5    | EVI5    | -       |
| hsa-miR-154 | -       | FAIM    | FAIM    |
| hsa-miR-154 | FAM154B | FAM154B | -       |
| hsa-miR-154 | FAM176A | FAM176A | -       |
| hsa-miR-154 | -       | FAM63B  | FAM63B  |
| hsa-miR-154 | -       | FAM9C   | FAM9C   |
| hsa-miR-154 | -       | FBRS    | FBRS    |
| hsa-miR-154 | FBXL16  | FBXL16  | -       |
| hsa-miR-154 | -       | FGF14   | FGF14   |
| hsa-miR-154 | -       | FGFBP3  | FGFBP3  |
| hsa-miR-154 | -       | FHL1    | FHL1    |
| hsa-miR-154 | -       | FLAD1   | FLAD1   |
| hsa-miR-154 | -       | FNDC3A  | FNDC3A  |
| hsa-miR-154 | FNIP1   | FNIP1   | -       |
| hsa-miR-154 | FOXN3   | FOXN3   | -       |
| hsa-miR-154 | -       | FRY     | FRY     |
| hsa-miR-154 | -       | FUCA1   | FUCA1   |
| hsa-miR-154 | FXR1    | FXR1    | -       |
| hsa-miR-154 | GALNT7  | GALNT7  | -       |
| hsa-miR-154 | -       | GBP7    | GBP7    |
| hsa-miR-154 | -       | GC      | GC      |
| hsa-miR-154 | -       | GDPD1   | GDPD1   |
| hsa-miR-154 | -       | GMPR    | GMPR    |
| hsa-miR-154 | GNB1    | GNB1    | -       |
| hsa-miR-154 | GPM6B   | GPM6B   | -       |
| hsa-miR-154 | -       | GPR113  | GPR113  |

|             |        |          |          |
|-------------|--------|----------|----------|
| hsa-miR-154 | -      | GPR137B  | GPR137B  |
| hsa-miR-154 | -      | GPR22    | GPR22    |
| hsa-miR-154 | -      | GRM3     | GRM3     |
| hsa-miR-154 | -      | GRM7     | GRM7     |
| hsa-miR-154 | -      | GZF1     | GZF1     |
| hsa-miR-154 | -      | HAPLN2   | HAPLN2   |
| hsa-miR-154 | HDHD2  | HDHD2    | -        |
| hsa-miR-154 | -      | HEY1     | HEY1     |
| hsa-miR-154 | HMGA2  | HMGA2    | -        |
| hsa-miR-154 | HNRNPR | HNRNPR   | -        |
| hsa-miR-154 | -      | HSF2BP   | HSF2BP   |
| hsa-miR-154 | -      | HSPB2    | HSPB2    |
| hsa-miR-154 | -      | HYLS1    | HYLS1    |
| hsa-miR-154 | -      | IL12A    | IL12A    |
| hsa-miR-154 | -      | IL1F8    | IL1F8    |
| hsa-miR-154 | -      | IL20     | IL20     |
| hsa-miR-154 | -      | ITGB3BP  | ITGB3BP  |
| hsa-miR-154 | JAM3   | JAM3     | -        |
| hsa-miR-154 | JHDM1D | JHDM1D   | -        |
| hsa-miR-154 | -      | JMJD5    | JMJD5    |
| hsa-miR-154 | KCMF1  | KCMF1    | -        |
| hsa-miR-154 | -      | KDEL3    | KDEL3    |
| hsa-miR-154 | -      | KIAA0090 | KIAA0090 |
| hsa-miR-154 | -      | KIAA1704 | KIAA1704 |
| hsa-miR-154 | -      | KIF5B    | KIF5B    |
| hsa-miR-154 | -      | KLF4     | KLF4     |
| hsa-miR-154 | KLHL28 | KLHL28   | -        |
| hsa-miR-154 | -      | KLHL5    | KLHL5    |
| hsa-miR-154 | KPNA4  | KPNA4    | -        |
| hsa-miR-154 | -      | KRT26    | KRT26    |
| hsa-miR-154 | LPP    | LPP      | -        |
| hsa-miR-154 | -      | LRFN5    | LRFN5    |
| hsa-miR-154 | LRRTM2 | LRRTM2   | -        |
| hsa-miR-154 | LUZP2  | LUZP2    | -        |
| hsa-miR-154 | -      | LZIC     | LZIC     |
| hsa-miR-154 | MAF    | MAF      | -        |
| hsa-miR-154 | MAGI2  | MAGI2    | -        |
| hsa-miR-154 | MAP4   | MAP4     | -        |
| hsa-miR-154 | -      | MSH2     | MSH2     |
| hsa-miR-154 | -      | MTG1     | MTG1     |
| hsa-miR-154 | MTUS1  | MTUS1    | -        |
| hsa-miR-154 | NAP1L1 | NAP1L1   | -        |
| hsa-miR-154 | -      | NBPF5    | NBPF5    |
| hsa-miR-154 | -      | NDUFS1   | NDUFS1   |
| hsa-miR-154 | -      | NEK1     | NEK1     |
| hsa-miR-154 | -      | NES      | NES      |
| hsa-miR-154 | NFYB   | NFYB     | -        |
| hsa-miR-154 | NIPBL  | NIPBL    | -        |
| hsa-miR-154 | -      | NME4     | NME4     |
| hsa-miR-154 | NPEPPS | NPEPPS   | -        |
| hsa-miR-154 | -      | NPTN     | NPTN     |

|             |          |          |          |
|-------------|----------|----------|----------|
| hsa-miR-154 | NR3C1    | NR3C1    | -        |
| hsa-miR-154 | -        | NRBF2    | NRBF2    |
| hsa-miR-154 | NRF1     | NRF1     | -        |
| hsa-miR-154 | -        | OCIAD1   | OCIAD1   |
| hsa-miR-154 | -        | OFD1     | OFD1     |
| hsa-miR-154 | -        | OLFM1    | OLFM1    |
| hsa-miR-154 | PAFAH1B2 | PAFAH1B2 | -        |
| hsa-miR-154 | PAPPA    | PAPPA    | -        |
| hsa-miR-154 | -        | PCCA     | PCCA     |
| hsa-miR-154 | -        | PCNA     | PCNA     |
| hsa-miR-154 | -        | PDZD11   | PDZD11   |
| hsa-miR-154 | PHC3     | PHC3     | -        |
| hsa-miR-154 | -        | PHF2     | PHF2     |
| hsa-miR-154 | -        | PIWIL1   | PIWIL1   |
| hsa-miR-154 | PKNOX2   | PKNOX2   | -        |
| hsa-miR-154 | -        | PLA2G12A | PLA2G12A |
| hsa-miR-154 | PLAGL2   | PLAGL2   | -        |
| hsa-miR-154 | -        | PNPLA3   | PNPLA3   |
| hsa-miR-154 | -        | POR      | POR      |
| hsa-miR-154 | -        | POSTN    | POSTN    |
| hsa-miR-154 | -        | PPM1B    | PPM1B    |
| hsa-miR-154 | PPM1N    | PPM1N    | -        |
| hsa-miR-154 | -        | PPP2CA   | PPP2CA   |
| hsa-miR-154 | -        | PREP     | PREP     |
| hsa-miR-154 | -        | PRG4     | PRG4     |
| hsa-miR-154 | PRKD3    | PRKD3    | -        |
| hsa-miR-154 | -        | PSMC6    | PSMC6    |
| hsa-miR-154 | -        | PTF1A    | PTF1A    |
| hsa-miR-154 | PTPLAD2  | PTPLAD2  | -        |
| hsa-miR-154 | -        | PUS1     | PUS1     |
| hsa-miR-154 | -        | QRSL1    | QRSL1    |
| hsa-miR-154 | RAB2A    | RAB2A    | -        |
| hsa-miR-154 | -        | RAB3GAP1 | RAB3GAP1 |
| hsa-miR-154 | RAB5B    | RAB5B    | -        |
| hsa-miR-154 | RAB7L1   | RAB7L1   | -        |
| hsa-miR-154 | -        | RABGAP1L | RABGAP1L |
| hsa-miR-154 | RAD9B    | RAD9B    | -        |
| hsa-miR-154 | -        | RAG2     | RAG2     |
| hsa-miR-154 | -        | RAP1GDS1 | RAP1GDS1 |
| hsa-miR-154 | RBM12    | RBM12    | -        |
| hsa-miR-154 | RBM24    | RBM24    | -        |
| hsa-miR-154 | RBMS1    | RBMS1    | -        |
| hsa-miR-154 | -        | RFC5     | RFC5     |
| hsa-miR-154 | -        | RHBDF1   | RHBDF1   |
| hsa-miR-154 | -        | RHEBL1   | RHEBL1   |
| hsa-miR-154 | -        | RHOT1    | RHOT1    |
| hsa-miR-154 | RNF11    | RNF11    | -        |
| hsa-miR-154 | -        | RP1      | RP1      |
| hsa-miR-154 | -        | RPAIN    | RPAIN    |
| hsa-miR-154 | -        | RRAGB    | RRAGB    |
| hsa-miR-154 | -        | RSAD2    | RSAD2    |

|             |          |           |           |
|-------------|----------|-----------|-----------|
| hsa-miR-154 | RYBP     | RYBP      | -         |
| hsa-miR-154 | -        | S100G     | S100G     |
| hsa-miR-154 | SALL1    | SALL1     | -         |
| hsa-miR-154 | -        | SCARA5    | SCARA5    |
| hsa-miR-154 | SDPR     | SDPR      | -         |
| hsa-miR-154 | -        | SEC24B    | SEC24B    |
| hsa-miR-154 | -        | SF3B1     | SF3B1     |
| hsa-miR-154 | -        | SFMBT1    | SFMBT1    |
| hsa-miR-154 | -        | SFRS3     | SFRS3     |
| hsa-miR-154 | -        | SHFM1     | SHFM1     |
| hsa-miR-154 | -        | SIGLEC6   | SIGLEC6   |
| hsa-miR-154 | -        | SLAMF1    | SLAMF1    |
| hsa-miR-154 | -        | SLC25A28  | SLC25A28  |
| hsa-miR-154 | SLTM     | SLTM      | -         |
| hsa-miR-154 | SMEK1    | SMEK1     | -         |
| hsa-miR-154 | -        | SMN2      | SMN2      |
| hsa-miR-154 | -        | SOS2      | SOS2      |
| hsa-miR-154 | -        | SOX3      | SOX3      |
| hsa-miR-154 | STXBP5L  | STXBP5L   | -         |
| hsa-miR-154 | STYX     | STYX      | -         |
| hsa-miR-154 | SUSD5    | SUSD5     | -         |
| hsa-miR-154 | -        | SVOP      | SVOP      |
| hsa-miR-154 | TADA1    | TADA1     | -         |
| hsa-miR-154 | -        | TBC1D7    | TBC1D7    |
| hsa-miR-154 | TCF12    | TCF12     | -         |
| hsa-miR-154 | -        | TCN1      | TCN1      |
| hsa-miR-154 | -        | TLR2      | TLR2      |
| hsa-miR-154 | -        | TM2D1     | TM2D1     |
| hsa-miR-154 | -        | TMEM100   | TMEM100   |
| hsa-miR-154 | -        | TMEM107   | TMEM107   |
| hsa-miR-154 | TMEM133  | TMEM133   | -         |
| hsa-miR-154 | TMEM184B | TMEM184B  | -         |
| hsa-miR-154 | -        | TMEM2     | TMEM2     |
| hsa-miR-154 | -        | TMEM67    | TMEM67    |
| hsa-miR-154 | -        | TMPRSS11D | TMPRSS11D |
| hsa-miR-154 | -        | TNFSF10   | TNFSF10   |
| hsa-miR-154 | -        | TPH2      | TPH2      |
| hsa-miR-154 | -        | TRAF3IP3  | TRAF3IP3  |
| hsa-miR-154 | -        | TRAPPC3   | TRAPPC3   |
| hsa-miR-154 | -        | TRIM5     | TRIM5     |
| hsa-miR-154 | TRPM7    | TRPM7     | -         |
| hsa-miR-154 | -        | TSPAN1    | TSPAN1    |
| hsa-miR-154 | -        | TTC35     | TTC35     |
| hsa-miR-154 | -        | TTC6      | TTC6      |
| hsa-miR-154 | -        | TUSC1     | TUSC1     |
| hsa-miR-154 | -        | TUSC3     | TUSC3     |
| hsa-miR-154 | -        | TYR       | TYR       |
| hsa-miR-154 | -        | UBASH3A   | UBASH3A   |
| hsa-miR-154 | UBE2A    | UBE2A     | -         |
| hsa-miR-154 | UBE2D2   | UBE2D2    | -         |
| hsa-miR-154 | UBE2D3   | UBE2D3    | -         |

|              |          |          |         |
|--------------|----------|----------|---------|
| hsa-miR-154  | -        | UBE2U    | UBE2U   |
| hsa-miR-154  | -        | UGT1A1   | UGT1A1  |
| hsa-miR-154  | USP31    | USP31    | -       |
| hsa-miR-154  | UST      | UST      | -       |
| hsa-miR-154  | -        | VPS4B    | VPS4B   |
| hsa-miR-154  | -        | WBP5     | WBP5    |
| hsa-miR-154  | -        | WDR19    | WDR19   |
| hsa-miR-154  | -        | WDR43    | WDR43   |
| hsa-miR-154  | -        | XDH      | XDH     |
| hsa-miR-154  | -        | XG       | XG      |
| hsa-miR-154  | -        | XPNPEP2  | XPNPEP2 |
| hsa-miR-154  | XPR1     | XPR1     | -       |
| hsa-miR-154  | ZHX2     | ZHX2     | -       |
| hsa-miR-154  | -        | ZNF12    | ZNF12   |
| hsa-miR-154  | -        | ZNF248   | ZNF248  |
| hsa-miR-154  | -        | ZNF267   | ZNF267  |
| hsa-miR-154  | -        | ZNF287   | ZNF287  |
| hsa-miR-154  | -        | ZNF599   | ZNF599  |
| hsa-miR-154  | -        | ZNF8     | ZNF8    |
| hsa-miR-181d | AAK1     | AAK1     | -       |
| hsa-miR-181d | ABI1     | ABI1     | -       |
| hsa-miR-181d | ABI3BP   | ABI3BP   | -       |
| hsa-miR-181d | ABTB2    | ABTB2    | -       |
| hsa-miR-181d | ACAN     | ACAN     | -       |
| hsa-miR-181d | ACAP2    | ACAP2    | -       |
| hsa-miR-181d | ACER3    | ACER3    | -       |
| hsa-miR-181d | -        | ACMSD    | ACMSD   |
| hsa-miR-181d | ACSL1    | ACSL1    | -       |
| hsa-miR-181d | -        | ACTA2    | ACTA2   |
| hsa-miR-181d | ACVR2A   | ACVR2A   | -       |
| hsa-miR-181d | -        | ACYP1    | ACYP1   |
| hsa-miR-181d | ADAM11   | ADAM11   | -       |
| hsa-miR-181d | ADAMTS1  | ADAMTS1  | -       |
| hsa-miR-181d | ADAMTS18 | ADAMTS18 | -       |
| hsa-miR-181d | ADAMTS19 | ADAMTS19 | -       |
| hsa-miR-181d | ADAMTS5  | ADAMTS5  | -       |
| hsa-miR-181d | -        | ADAMTS6  | ADAMTS6 |
| hsa-miR-181d | ADAMTSL1 | ADAMTSL1 | -       |
| hsa-miR-181d | ADARB1   | ADARB1   | -       |
| hsa-miR-181d | ADCY9    | ADCY9    | -       |
| hsa-miR-181d | ADO      | ADO      | -       |
| hsa-miR-181d | ADRBK1   | ADRBK1   | -       |
| hsa-miR-181d | AFAP1    | AFAP1    | -       |
| hsa-miR-181d | AFF1     | AFF1     | -       |
| hsa-miR-181d | AFTPH    | AFTPH    | -       |
| hsa-miR-181d | AGFG1    | AGFG1    | -       |
| hsa-miR-181d | -        | AGGF1    | AGGF1   |
| hsa-miR-181d | AHNAK    | AHNAK    | -       |
| hsa-miR-181d | -        | AIM1L    | AIM1L   |
| hsa-miR-181d | AK3      | AK3      | -       |
| hsa-miR-181d | -        | AKAP4    | AKAP4   |

|              |          |          |         |
|--------------|----------|----------|---------|
| hsa-miR-181d | AKAP6    | AKAP6    | -       |
| hsa-miR-181d | AKAP7    | AKAP7    | -       |
| hsa-miR-181d | AKIRIN1  | AKIRIN1  | -       |
| hsa-miR-181d | -        | ALDH9A1  | ALDH9A1 |
| hsa-miR-181d | -        | AMAC1    | AMAC1   |
| hsa-miR-181d | ANAPC16  | ANAPC16  | -       |
| hsa-miR-181d | ANK1     | ANK1     | -       |
| hsa-miR-181d | ANKFY1   | ANKFY1   | -       |
| hsa-miR-181d | -        | ANKRD10  | ANKRD10 |
| hsa-miR-181d | ANKRD12  | ANKRD12  | -       |
| hsa-miR-181d | ANKRD13C | ANKRD13C | -       |
| hsa-miR-181d | ANKRD43  | ANKRD43  | -       |
| hsa-miR-181d | ANKRD50  | ANKRD50  | -       |
| hsa-miR-181d | ANO1     | ANO1     | -       |
| hsa-miR-181d | ANP32A   | ANP32A   | -       |
| hsa-miR-181d | -        | ANXA10   | ANXA10  |
| hsa-miR-181d | ANXA11   | ANXA11   | -       |
| hsa-miR-181d | AP1G1    | AP1G1    | -       |
| hsa-miR-181d | AP1S3    | AP1S3    | -       |
| hsa-miR-181d | APBA1    | APBA1    | -       |
| hsa-miR-181d | -        | APBB1IP  | APBB1IP |
| hsa-miR-181d | APH1B    | APH1B    | -       |
| hsa-miR-181d | -        | APOBEC1  | APOBEC1 |
| hsa-miR-181d | ARF3     | ARF3     | -       |
| hsa-miR-181d | ARF6     | ARF6     | -       |
| hsa-miR-181d | ARHGEF37 | ARHGEF37 | -       |
| hsa-miR-181d | ARHGEF7  | ARHGEF7  | -       |
| hsa-miR-181d | ARID2    | ARID2    | -       |
| hsa-miR-181d | ARL1     | ARL1     | -       |
| hsa-miR-181d | ARL5A    | ARL5A    | -       |
| hsa-miR-181d | ARNT2    | ARNT2    | -       |
| hsa-miR-181d | -        | ARPC1A   | ARPC1A  |
| hsa-miR-181d | -        | ARPC1B   | ARPC1B  |
| hsa-miR-181d | ARRDC3   | ARRDC3   | -       |
| hsa-miR-181d | -        | ASXL2    | ASXL2   |
| hsa-miR-181d | -        | ATG5     | ATG5    |
| hsa-miR-181d | ATM      | ATM      | -       |
| hsa-miR-181d | ATMIN    | ATMIN    | -       |
| hsa-miR-181d | ATP11A   | ATP11A   | -       |
| hsa-miR-181d | ATP11C   | ATP11C   | -       |
| hsa-miR-181d | ATP1B1   | ATP1B1   | -       |
| hsa-miR-181d | ATP2A2   | ATP2A2   | -       |
| hsa-miR-181d | ATP2B1   | ATP2B1   | -       |
| hsa-miR-181d | ATP2B2   | ATP2B2   | -       |
| hsa-miR-181d | ATP2B3   | ATP2B3   | -       |
| hsa-miR-181d | ATP8A1   | ATP8A1   | -       |
| hsa-miR-181d | ATP8B1   | ATP8B1   | -       |
| hsa-miR-181d | -        | ATPAF2   | ATPAF2  |
| hsa-miR-181d | ATXN1    | ATXN1    | -       |
| hsa-miR-181d | ATXN3    | ATXN3    | -       |
| hsa-miR-181d | ATXN7    | ATXN7    | -       |

|              |          |           |           |
|--------------|----------|-----------|-----------|
| hsa-miR-181d | -        | AUTS2     | AUTS2     |
| hsa-miR-181d | -        | B3GALT1   | B3GALT1   |
| hsa-miR-181d | B4GALT1  | B4GALT1   | -         |
| hsa-miR-181d | BACH2    | BACH2     | -         |
| hsa-miR-181d | -        | BAG2      | BAG2      |
| hsa-miR-181d | BAG4     | BAG4      | -         |
| hsa-miR-181d | BAIAP2   | BAIAP2    | -         |
| hsa-miR-181d | -        | BANK1     | BANK1     |
| hsa-miR-181d | BAZ2A    | BAZ2A     | -         |
| hsa-miR-181d | BAZ2B    | BAZ2B     | -         |
| hsa-miR-181d | -        | BBS2      | BBS2      |
| hsa-miR-181d | -        | BBS9      | BBS9      |
| hsa-miR-181d | -        | BCHE      | BCHE      |
| hsa-miR-181d | BCL2     | BCL2      | -         |
| hsa-miR-181d | BCL2L11  | BCL2L11   | -         |
| hsa-miR-181d | BCLAF1   | BCLAF1    | -         |
| hsa-miR-181d | BCR      | BCR       | -         |
| hsa-miR-181d | BEND3    | BEND3     | -         |
| hsa-miR-181d | -        | BEX2      | BEX2      |
| hsa-miR-181d | BHLHE40  | BHLHE40   | -         |
| hsa-miR-181d | -        | BID       | BID       |
| hsa-miR-181d | BIRC6    | BIRC6     | -         |
| hsa-miR-181d | -        | BMP2K     | BMP2K     |
| hsa-miR-181d | BMP3     | BMP3      | -         |
| hsa-miR-181d | BPTF     | BPTF      | -         |
| hsa-miR-181d | BRD1     | BRD1      | -         |
| hsa-miR-181d | -        | BRD8      | BRD8      |
| hsa-miR-181d | -        | BRDT      | BRDT      |
| hsa-miR-181d | BRWD1    | BRWD1     | -         |
| hsa-miR-181d | BTBD3    | BTBD3     | -         |
| hsa-miR-181d | C10orf46 | C10orf46  | -         |
| hsa-miR-181d | -        | C10orf68  | C10orf68  |
| hsa-miR-181d | -        | C10orf78  | C10orf78  |
| hsa-miR-181d | C11orf30 | C11orf30  | -         |
| hsa-miR-181d | C11orf41 | C11orf41  | -         |
| hsa-miR-181d | C12orf29 | C12orf29  | -         |
| hsa-miR-181d | -        | C12orf35  | C12orf35  |
| hsa-miR-181d | -        | C12orf51  | C12orf51  |
| hsa-miR-181d | -        | C12orf56  | C12orf56  |
| hsa-miR-181d | C12orf68 | C12orf68  | -         |
| hsa-miR-181d | C13orf23 | C13orf23  | -         |
| hsa-miR-181d | -        | C14orf135 | C14orf135 |
| hsa-miR-181d | -        | C14orf178 | C14orf178 |
| hsa-miR-181d | C14orf28 | C14orf28  | -         |
| hsa-miR-181d | C14orf43 | C14orf43  | -         |
| hsa-miR-181d | C15orf29 | C15orf29  | -         |
| hsa-miR-181d | -        | C15orf48  | C15orf48  |
| hsa-miR-181d | -        | C16orf75  | C16orf75  |
| hsa-miR-181d | C17orf39 | C17orf39  | -         |
| hsa-miR-181d | C17orf63 | C17orf63  | -         |
| hsa-miR-181d | -        | C18orf34  | C18orf34  |

|              |           |           |           |
|--------------|-----------|-----------|-----------|
| hsa-miR-181d | C1GALT1   | C1GALT1   | -         |
| hsa-miR-181d | -         | C1orf131  | C1orf131  |
| hsa-miR-181d | -         | C1orf185  | C1orf185  |
| hsa-miR-181d | -         | C1orf50   | C1orf50   |
| hsa-miR-181d | -         | C21orf105 | C21orf105 |
| hsa-miR-181d | -         | C2orf29   | C2orf29   |
| hsa-miR-181d | C2orf69   | C2orf69   | -         |
| hsa-miR-181d | -         | C3orf14   | C3orf14   |
| hsa-miR-181d | C3orf43   | C3orf43   | -         |
| hsa-miR-181d | C3orf62   | C3orf62   | -         |
| hsa-miR-181d | -         | C5orf34   | C5orf34   |
| hsa-miR-181d | C5orf41   | C5orf41   | -         |
| hsa-miR-181d | -         | C6orf130  | C6orf130  |
| hsa-miR-181d | -         | C6orf211  | C6orf211  |
| hsa-miR-181d | C6orf35   | C6orf35   | -         |
| hsa-miR-181d | C6orf62   | C6orf62   | -         |
| hsa-miR-181d | C6orf89   | C6orf89   | -         |
| hsa-miR-181d | C7orf41   | C7orf41   | -         |
| hsa-miR-181d | C7orf60   | C7orf60   | -         |
| hsa-miR-181d | -         | C9orf11   | C9orf11   |
| hsa-miR-181d | -         | C9orf71   | C9orf71   |
| hsa-miR-181d | -         | CA3       | CA3       |
| hsa-miR-181d | CA5B      | CA5B      | -         |
| hsa-miR-181d | -         | CABC1     | CABC1     |
| hsa-miR-181d | CACNA2D2  | CACNA2D2  | -         |
| hsa-miR-181d | -         | CADPS     | CADPS     |
| hsa-miR-181d | CALCR     | CALCR     | -         |
| hsa-miR-181d | CALM1     | CALM1     | -         |
| hsa-miR-181d | CAMK2G    | CAMK2G    | -         |
| hsa-miR-181d | CAMKK1    | CAMKK1    | -         |
| hsa-miR-181d | CAMSAP1   | CAMSAP1   | -         |
| hsa-miR-181d | CAMSAP1L1 | CAMSAP1L1 | -         |
| hsa-miR-181d | CAMTA2    | CAMTA2    | -         |
| hsa-miR-181d | CAPRIN1   | CAPRIN1   | -         |
| hsa-miR-181d | -         | CAPS2     | CAPS2     |
| hsa-miR-181d | CARM1     | CARM1     | -         |
| hsa-miR-181d | CASC4     | CASC4     | -         |
| hsa-miR-181d | -         | CASP1     | CASP1     |
| hsa-miR-181d | CASP10    | CASP10    | -         |
| hsa-miR-181d | CBFA2T3   | CBFA2T3   | -         |
| hsa-miR-181d | CBLB      | CBLB      | -         |
| hsa-miR-181d | CBLL1     | CBLL1     | -         |
| hsa-miR-181d | -         | CBR1      | CBR1      |
| hsa-miR-181d | CBX4      | CBX4      | -         |
| hsa-miR-181d | CBX7      | CBX7      | -         |
| hsa-miR-181d | -         | CCDC102A  | CCDC102A  |
| hsa-miR-181d | CCDC117   | CCDC117   | -         |
| hsa-miR-181d | -         | CCDC14    | CCDC14    |
| hsa-miR-181d | CCDC141   | CCDC141   | -         |
| hsa-miR-181d | -         | CCDC41    | CCDC41    |
| hsa-miR-181d | -         | CCDC42    | CCDC42    |



|              |          |          |          |
|--------------|----------|----------|----------|
| hsa-miR-181d | -        | CCDC51   | CCDC51   |
| hsa-miR-181d | CCDC6    | CCDC6    | -        |
| hsa-miR-181d | -        | CCDC60   | CCDC60   |
| hsa-miR-181d | -        | CCDC62   | CCDC62   |
| hsa-miR-181d | -        | CCDC75   | CCDC75   |
| hsa-miR-181d | CCDC85A  | CCDC85A  | -        |
| hsa-miR-181d | CCNG1    | CCNG1    | -        |
| hsa-miR-181d | CCNJ     | CCNJ     | -        |
| hsa-miR-181d | CCNK     | CCNK     | -        |
| hsa-miR-181d | -        | CCR3     | CCR3     |
| hsa-miR-181d | CD2AP    | CD2AP    | -        |
| hsa-miR-181d | -        | CD48     | CD48     |
| hsa-miR-181d | CD69     | CD69     | -        |
| hsa-miR-181d | -        | CDADC1   | CDADC1   |
| hsa-miR-181d | CDC14B   | CDC14B   | -        |
| hsa-miR-181d | CDC42BPA | CDC42BPA | -        |
| hsa-miR-181d | CDC73    | CDC73    | -        |
| hsa-miR-181d | CDH13    | CDH13    | -        |
| hsa-miR-181d | CDH8     | CDH8     | -        |
| hsa-miR-181d | CDK8     | CDK8     | -        |
| hsa-miR-181d | CDKL2    | CDKL2    | -        |
| hsa-miR-181d | -        | CDKN2AIP | CDKN2AIP |
| hsa-miR-181d | -        | CDKN3    | CDKN3    |
| hsa-miR-181d | CDON     | CDON     | -        |
| hsa-miR-181d | CDS2     | CDS2     | -        |
| hsa-miR-181d | CDX2     | CDX2     | -        |
| hsa-miR-181d | CDYL     | CDYL     | -        |
| hsa-miR-181d | CECR2    | CECR2    | -        |
| hsa-miR-181d | CEP135   | CEP135   | -        |
| hsa-miR-181d | CEP350   | CEP350   | -        |
| hsa-miR-181d | -        | CETN3    | CETN3    |
| hsa-miR-181d | CHD1     | CHD1     | -        |
| hsa-miR-181d | CHD7     | CHD7     | -        |
| hsa-miR-181d | CHD9     | CHD9     | -        |
| hsa-miR-181d | CHIC1    | CHIC1    | -        |
| hsa-miR-181d | CHMP1B   | CHMP1B   | -        |
| hsa-miR-181d | -        | CHRNA9   | CHRNA9   |
| hsa-miR-181d | -        | CKAP2    | CKAP2    |
| hsa-miR-181d | -        | CKS1B    | CKS1B    |
| hsa-miR-181d | CLASP1   | CLASP1   | -        |
| hsa-miR-181d | CLIP1    | CLIP1    | -        |
| hsa-miR-181d | -        | CLLU10S  | CLLU10S  |
| hsa-miR-181d | CLVS1    | CLVS1    | -        |
| hsa-miR-181d | CNKSR3   | CNKSR3   | -        |
| hsa-miR-181d | -        | CNNM2    | CNNM2    |
| hsa-miR-181d | CNOT1    | CNOT1    | -        |
| hsa-miR-181d | CNOT2    | CNOT2    | -        |
| hsa-miR-181d | -        | CNOT4    | CNOT4    |
| hsa-miR-181d | CNOT6L   | CNOT6L   | -        |
| hsa-miR-181d | CNR1     | CNR1     | -        |
| hsa-miR-181d | CNTN4    | CNTN4    | -        |

|              |           |           |          |
|--------------|-----------|-----------|----------|
| hsa-miR-181d | CNTNAP2   | CNTNAP2   | -        |
| hsa-miR-181d | -         | CNTNAP4   | CNTNAP4  |
| hsa-miR-181d | -         | COASY     | COASY    |
| hsa-miR-181d | -         | COG6      | COG6     |
| hsa-miR-181d | -         | COIL      | COIL     |
| hsa-miR-181d | COL16A1   | COL16A1   | -        |
| hsa-miR-181d | COL5A1    | COL5A1    | -        |
| hsa-miR-181d | -         | COL6A3    | COL6A3   |
| hsa-miR-181d | COMMD6    | COMMD6    | -        |
| hsa-miR-181d | -         | COQ2      | COQ2     |
| hsa-miR-181d | -         | CP        | CP       |
| hsa-miR-181d | CPD       | CPD       | -        |
| hsa-miR-181d | CPEB4     | CPEB4     | -        |
| hsa-miR-181d | -         | CPOX      | CPOX     |
| hsa-miR-181d | CPSF6     | CPSF6     | -        |
| hsa-miR-181d | CPT1A     | CPT1A     | -        |
| hsa-miR-181d | -         | CRB1      | CRB1     |
| hsa-miR-181d | CREB1     | CREB1     | -        |
| hsa-miR-181d | -         | CREB3     | CREB3    |
| hsa-miR-181d | CREBL2    | CREBL2    | -        |
| hsa-miR-181d | -         | CREG2     | CREG2    |
| hsa-miR-181d | CRIM1     | CRIM1     | -        |
| hsa-miR-181d | CRISPLD1  | CRISPLD1  | -        |
| hsa-miR-181d | -         | CRLF3     | CRLF3    |
| hsa-miR-181d | CSNK1G1   | CSNK1G1   | -        |
| hsa-miR-181d | CSNK1G3   | CSNK1G3   | -        |
| hsa-miR-181d | CTDSPL    | CTDSPL    | -        |
| hsa-miR-181d | CTNND1    | CTNND1    | -        |
| hsa-miR-181d | CTTNBP2NL | CTTNBP2NL | -        |
| hsa-miR-181d | CUL3      | CUL3      | -        |
| hsa-miR-181d | CUL4A     | CUL4A     | -        |
| hsa-miR-181d | CUL5      | CUL5      | -        |
| hsa-miR-181d | -         | CXCL2     | CXCL2    |
| hsa-miR-181d | CYP26B1   | CYP26B1   | -        |
| hsa-miR-181d | -         | CYP2C8    | CYP2C8   |
| hsa-miR-181d | -         | CYP7A1    | CYP7A1   |
| hsa-miR-181d | CYR61     | CYR61     | -        |
| hsa-miR-181d | -         | CYorf15A  | CYorf15A |
| hsa-miR-181d | D4S234E   | D4S234E   | -        |
| hsa-miR-181d | DCAF16    | DCAF16    | -        |
| hsa-miR-181d | DCBLD2    | DCBLD2    | -        |
| hsa-miR-181d | DCLK1     | DCLK1     | -        |
| hsa-miR-181d | -         | DCN       | DCN      |
| hsa-miR-181d | DCP1A     | DCP1A     | -        |
| hsa-miR-181d | DDX3X     | DDX3X     | -        |
| hsa-miR-181d | DDX3Y     | DDX3Y     | -        |
| hsa-miR-181d | DDX5      | DDX5      | -        |
| hsa-miR-181d | DEK       | DEK       | -        |
| hsa-miR-181d | DENND5B   | DENND5B   | -        |
| hsa-miR-181d | -         | DEPDC6    | DEPDC6   |
| hsa-miR-181d | DERL1     | DERL1     | -        |

|              |         |           |           |
|--------------|---------|-----------|-----------|
| hsa-miR-181d | DGCR2   | DGCR2     | -         |
| hsa-miR-181d | -       | DGKH      | DGKH      |
| hsa-miR-181d | -       | DHX29     | DHX29     |
| hsa-miR-181d | DIP2A   | DIP2A     | -         |
| hsa-miR-181d | DIP2B   | DIP2B     | -         |
| hsa-miR-181d | -       | DIRAS3    | DIRAS3    |
| hsa-miR-181d | -       | DIS3L     | DIS3L     |
| hsa-miR-181d | -       | DLC1      | DLC1      |
| hsa-miR-181d | DLG2    | DLG2      | -         |
| hsa-miR-181d | DLGAP2  | DLGAP2    | -         |
| hsa-miR-181d | -       | DMGDH     | DMGDH     |
| hsa-miR-181d | -       | DMRT3     | DMRT3     |
| hsa-miR-181d | DNAJA4  | DNAJA4    | -         |
| hsa-miR-181d | DNAJB1  | DNAJB1    | -         |
| hsa-miR-181d | -       | DNAJC12   | DNAJC12   |
| hsa-miR-181d | DNAJC21 | DNAJC21   | -         |
| hsa-miR-181d | DNAJC3  | DNAJC3    | -         |
| hsa-miR-181d | DNAJC5  | DNAJC5    | -         |
| hsa-miR-181d | -       | DNAJC7    | DNAJC7    |
| hsa-miR-181d | DNAL1   | DNAL1     | -         |
| hsa-miR-181d | -       | DOCK10    | DOCK10    |
| hsa-miR-181d | -       | DOCK2     | DOCK2     |
| hsa-miR-181d | DOCK4   | DOCK4     | -         |
| hsa-miR-181d | -       | DOPEY1    | DOPEY1    |
| hsa-miR-181d | DPY19L2 | DPY19L2   | -         |
| hsa-miR-181d | -       | DPY19L2P1 | DPY19L2P1 |
| hsa-miR-181d | DPYSL2  | DPYSL2    | -         |
| hsa-miR-181d | -       | DSE       | DSE       |
| hsa-miR-181d | DTNA    | DTNA      | -         |
| hsa-miR-181d | -       | DTNB      | DTNB      |
| hsa-miR-181d | DUSP10  | DUSP10    | -         |
| hsa-miR-181d | DUSP5   | DUSP5     | -         |
| hsa-miR-181d | -       | DYM       | DYM       |
| hsa-miR-181d | -       | DYNC1LI2  | DYNC1LI2  |
| hsa-miR-181d | DYRK2   | DYRK2     | -         |
| hsa-miR-181d | E2F7    | E2F7      | -         |
| hsa-miR-181d | ECT2L   | ECT2L     | -         |
| hsa-miR-181d | EDAR    | EDAR      | -         |
| hsa-miR-181d | EED     | EED       | -         |
| hsa-miR-181d | -       | EFHA2     | EFHA2     |
| hsa-miR-181d | EGR1    | EGR1      | -         |
| hsa-miR-181d | EGR2    | EGR2      | -         |
| hsa-miR-181d | EGR3    | EGR3      | -         |
| hsa-miR-181d | EIF2AK1 | EIF2AK1   | -         |
| hsa-miR-181d | EIF2C4  | EIF2C4    | -         |
| hsa-miR-181d | EIF4A2  | EIF4A2    | -         |
| hsa-miR-181d | ELAVL2  | ELAVL2    | -         |
| hsa-miR-181d | ELAVL4  | ELAVL4    | -         |
| hsa-miR-181d | EMX2    | EMX2      | -         |
| hsa-miR-181d | EN1     | EN1       | -         |
| hsa-miR-181d | EN2     | EN2       | -         |

|              |          |          |         |
|--------------|----------|----------|---------|
| hsa-miR-181d | ENOX2    | ENOX2    | -       |
| hsa-miR-181d | ENPP1    | ENPP1    | -       |
| hsa-miR-181d | -        | ENSA     | ENSA    |
| hsa-miR-181d | EPB41    | EPB41    | -       |
| hsa-miR-181d | EPB41L4B | EPB41L4B | -       |
| hsa-miR-181d | EPC2     | EPC2     | -       |
| hsa-miR-181d | EPHA4    | EPHA4    | -       |
| hsa-miR-181d | EPHA5    | EPHA5    | -       |
| hsa-miR-181d | EPN2     | EPN2     | -       |
| hsa-miR-181d | EPS15    | EPS15    | -       |
| hsa-miR-181d | EPT1     | EPT1     | -       |
| hsa-miR-181d | ERI1     | ERI1     | -       |
| hsa-miR-181d | ERLIN2   | ERLIN2   | -       |
| hsa-miR-181d | ERMN     | ERMN     | -       |
| hsa-miR-181d | -        | ERO1L    | ERO1L   |
| hsa-miR-181d | ESM1     | ESM1     | -       |
| hsa-miR-181d | ESR1     | ESR1     | -       |
| hsa-miR-181d | ETS1     | ETS1     | -       |
| hsa-miR-181d | ETV6     | ETV6     | -       |
| hsa-miR-181d | EVI2A    | EVI2A    | -       |
| hsa-miR-181d | -        | EXOC2    | EXOC2   |
| hsa-miR-181d | -        | EXOSC2   | EXOSC2  |
| hsa-miR-181d | FAM102A  | FAM102A  | -       |
| hsa-miR-181d | FAM105B  | FAM105B  | -       |
| hsa-miR-181d | -        | FAM107B  | FAM107B |
| hsa-miR-181d | FAM122B  | FAM122B  | -       |
| hsa-miR-181d | FAM125B  | FAM125B  | -       |
| hsa-miR-181d | FAM135A  | FAM135A  | -       |
| hsa-miR-181d | FAM13B   | FAM13B   | -       |
| hsa-miR-181d | FAM160A1 | FAM160A1 | -       |
| hsa-miR-181d | FAM160A2 | FAM160A2 | -       |
| hsa-miR-181d | FAM171A1 | FAM171A1 | -       |
| hsa-miR-181d | FAM178A  | FAM178A  | -       |
| hsa-miR-181d | FAM179B  | FAM179B  | -       |
| hsa-miR-181d | FAM19A2  | FAM19A2  | -       |
| hsa-miR-181d | -        | FAM26D   | FAM26D  |
| hsa-miR-181d | FAM3C    | FAM3C    | -       |
| hsa-miR-181d | FAM46C   | FAM46C   | -       |
| hsa-miR-181d | -        | FAM47B   | FAM47B  |
| hsa-miR-181d | -        | FAM58A   | FAM58A  |
| hsa-miR-181d | -        | FAM5C    | FAM5C   |
| hsa-miR-181d | -        | FAM71C   | FAM71C  |
| hsa-miR-181d | FAM73B   | FAM73B   | -       |
| hsa-miR-181d | FAR1     | FAR1     | -       |
| hsa-miR-181d | -        | FAS      | FAS     |
| hsa-miR-181d | -        | FASTKD1  | FASTKD1 |
| hsa-miR-181d | FBXL17   | FBXL17   | -       |
| hsa-miR-181d | FBXO11   | FBXO11   | -       |
| hsa-miR-181d | FBXO41   | FBXO41   | -       |
| hsa-miR-181d | FBXO45   | FBXO45   | -       |
| hsa-miR-181d | -        | FBXO5    | FBXO5   |

|              |         |         |         |
|--------------|---------|---------|---------|
| hsa-miR-181d | -       | FDFT1   | FDFT1   |
| hsa-miR-181d | FGD4    | FGD4    | -       |
| hsa-miR-181d | -       | FGFR2   | FGFR2   |
| hsa-miR-181d | -       | FHAD1   | FHAD1   |
| hsa-miR-181d | FHDC1   | FHDC1   | -       |
| hsa-miR-181d | FIGN    | FIGN    | -       |
| hsa-miR-181d | FIGNL2  | FIGNL2  | -       |
| hsa-miR-181d | FKBP1A  | FKBP1A  | -       |
| hsa-miR-181d | FLT1    | FLT1    | -       |
| hsa-miR-181d | FMR1    | FMR1    | -       |
| hsa-miR-181d | FNBP4   | FNBP4   | -       |
| hsa-miR-181d | FNDC3A  | FNDC3A  | -       |
| hsa-miR-181d | -       | FNDC7   | FNDC7   |
| hsa-miR-181d | FOS     | FOS     | -       |
| hsa-miR-181d | -       | FUCA1   | FUCA1   |
| hsa-miR-181d | G3BP2   | G3BP2   | -       |
| hsa-miR-181d | GABRA1  | GABRA1  | -       |
| hsa-miR-181d | GAD2    | GAD2    | -       |
| hsa-miR-181d | GALK2   | GALK2   | -       |
| hsa-miR-181d | GALNT4  | GALNT4  | -       |
| hsa-miR-181d | GALNTL1 | GALNTL1 | -       |
| hsa-miR-181d | GAPVD1  | GAPVD1  | -       |
| hsa-miR-181d | GCC2    | GCC2    | -       |
| hsa-miR-181d | GCNT2   | GCNT2   | -       |
| hsa-miR-181d | GDPD1   | GDPD1   | -       |
| hsa-miR-181d | GFPT1   | GFPT1   | -       |
| hsa-miR-181d | -       | GGPS1   | GGPS1   |
| hsa-miR-181d | GIGYF1  | GIGYF1  | -       |
| hsa-miR-181d | -       | GK      | GK      |
| hsa-miR-181d | GLCCI1  | GLCCI1  | -       |
| hsa-miR-181d | GLI2    | GLI2    | -       |
| hsa-miR-181d | GLIS3   | GLIS3   | -       |
| hsa-miR-181d | GLS     | GLS     | -       |
| hsa-miR-181d | -       | GLYATL1 | GLYATL1 |
| hsa-miR-181d | GNAO1   | GNAO1   | -       |
| hsa-miR-181d | GNB4    | GNB4    | -       |
| hsa-miR-181d | GNG2    | GNG2    | -       |
| hsa-miR-181d | GOLGA1  | GOLGA1  | -       |
| hsa-miR-181d | GOT2    | GOT2    | -       |
| hsa-miR-181d | GPCPD1  | GPCPD1  | -       |
| hsa-miR-181d | GPD1L   | GPD1L   | -       |
| hsa-miR-181d | GPD2    | GPD2    | -       |
| hsa-miR-181d | GPR137C | GPR137C | -       |
| hsa-miR-181d | -       | GPR174  | GPR174  |
| hsa-miR-181d | -       | GPR22   | GPR22   |
| hsa-miR-181d | GRB10   | GRB10   | -       |
| hsa-miR-181d | GREM1   | GREM1   | -       |
| hsa-miR-181d | GRID1   | GRID1   | -       |
| hsa-miR-181d | GRIK2   | GRIK2   | -       |
| hsa-miR-181d | GRIK3   | GRIK3   | -       |
| hsa-miR-181d | -       | GRIP2   | GRIP2   |

|              |         |         |         |
|--------------|---------|---------|---------|
| hsa-miR-181d | GRM5    | GRM5    | -       |
| hsa-miR-181d | GRM7    | GRM7    | -       |
| hsa-miR-181d | -       | GSK3B   | GSK3B   |
| hsa-miR-181d | -       | GSTA4   | GSTA4   |
| hsa-miR-181d | -       | GTPBP3  | GTPBP3  |
| hsa-miR-181d | -       | GUCA1B  | GUCA1B  |
| hsa-miR-181d | H3F3B   | H3F3B   | -       |
| hsa-miR-181d | HAND2   | HAND2   | -       |
| hsa-miR-181d | HAPLN1  | HAPLN1  | -       |
| hsa-miR-181d | HAUS3   | HAUS3   | -       |
| hsa-miR-181d | HCN1    | HCN1    | -       |
| hsa-miR-181d | HCN2    | -       | HCN2    |
| hsa-miR-181d | -       | HCRTR1  | HCRTR1  |
| hsa-miR-181d | HECA    | HECA    | -       |
| hsa-miR-181d | HECW2   | HECW2   | -       |
| hsa-miR-181d | HEPHL1  | HEPHL1  | -       |
| hsa-miR-181d | HEXIM1  | HEXIM1  | -       |
| hsa-miR-181d | -       | HEY1    | HEY1    |
| hsa-miR-181d | HEY2    | HEY2    | -       |
| hsa-miR-181d | HIC2    | HIC2    | -       |
| hsa-miR-181d | -       | HIGD2A  | HIGD2A  |
| hsa-miR-181d | -       | HLA-B   | HLA-B   |
| hsa-miR-181d | -       | HLA-C   | HLA-C   |
| hsa-miR-181d | HLF     | HLF     | -       |
| hsa-miR-181d | -       | HMGCL   | HMGCL   |
| hsa-miR-181d | -       | HOOK3   | HOOK3   |
| hsa-miR-181d | HOXA1   | HOXA1   | -       |
| hsa-miR-181d | HOXA11  | HOXA11  | -       |
| hsa-miR-181d | -       | HOXB4   | HOXB4   |
| hsa-miR-181d | -       | HOXB5   | HOXB5   |
| hsa-miR-181d | HOXC8   | HOXC8   | -       |
| hsa-miR-181d | HOXD1   | HOXD1   | -       |
| hsa-miR-181d | -       | HS3ST2  | HS3ST2  |
| hsa-miR-181d | HS6ST1  | HS6ST1  | -       |
| hsa-miR-181d | HS6ST3  | HS6ST3  | -       |
| hsa-miR-181d | -       | HSD11B1 | HSD11B1 |
| hsa-miR-181d | -       | HSF2    | HSF2    |
| hsa-miR-181d | -       | HSPA1L  | HSPA1L  |
| hsa-miR-181d | HSPA5   | HSPA5   | -       |
| hsa-miR-181d | HSPC159 | HSPC159 | -       |
| hsa-miR-181d | HTT     | HTT     | -       |
| hsa-miR-181d | HYOU1   | HYOU1   | -       |
| hsa-miR-181d | -       | IDH1    | IDH1    |
| hsa-miR-181d | -       | IDH3A   | IDH3A   |
| hsa-miR-181d | -       | IFNA17  | IFNA17  |
| hsa-miR-181d | -       | IFNG    | IFNG    |
| hsa-miR-181d | -       | IFT74   | IFT74   |
| hsa-miR-181d | IGDCC3  | IGDCC3  | -       |
| hsa-miR-181d | -       | IGF2    | IGF2    |
| hsa-miR-181d | IGF2BP2 | IGF2BP2 | -       |
| hsa-miR-181d | IGSF11  | IGSF11  | -       |

|              |          |          |          |
|--------------|----------|----------|----------|
| hsa-miR-181d | IL1A     | IL1A     | -        |
| hsa-miR-181d | -        | IL7      | IL7      |
| hsa-miR-181d | ILF3     | ILF3     | -        |
| hsa-miR-181d | -        | IMPG1    | IMPG1    |
| hsa-miR-181d | IMPG2    | IMPG2    | -        |
| hsa-miR-181d | -        | INCENP   | INCENP   |
| hsa-miR-181d | INO80    | INO80    | -        |
| hsa-miR-181d | -        | INPP4B   | INPP4B   |
| hsa-miR-181d | INPP5A   | INPP5A   | -        |
| hsa-miR-181d | INPP5E   | INPP5E   | -        |
| hsa-miR-181d | IPO5     | IPO5     | -        |
| hsa-miR-181d | IPO8     | IPO8     | -        |
| hsa-miR-181d | IQSEC2   | IQSEC2   | -        |
| hsa-miR-181d | IRS2     | IRS2     | -        |
| hsa-miR-181d | ITGA3    | ITGA3    | -        |
| hsa-miR-181d | ITGA6    | ITGA6    | -        |
| hsa-miR-181d | ITSN1    | ITSN1    | -        |
| hsa-miR-181d | JARID2   | JARID2   | -        |
| hsa-miR-181d | JAZF1    | JAZF1    | -        |
| hsa-miR-181d | KALRN    | KALRN    | -        |
| hsa-miR-181d | KANK1    | KANK1    | -        |
| hsa-miR-181d | KBTBD7   | KBTBD7   | -        |
| hsa-miR-181d | KCNA1    | KCNA1    | -        |
| hsa-miR-181d | -        | KCND2    | KCND2    |
| hsa-miR-181d | -        | KCNE2    | KCNE2    |
| hsa-miR-181d | KCNH1    | KCNH1    | -        |
| hsa-miR-181d | KCNH8    | KCNH8    | -        |
| hsa-miR-181d | KCNJ10   | KCNJ10   | -        |
| hsa-miR-181d | KCNK10   | KCNK10   | -        |
| hsa-miR-181d | -        | KCNMB2   | KCNMB2   |
| hsa-miR-181d | -        | KCNN1    | KCNN1    |
| hsa-miR-181d | KCNQ5    | KCNQ5    | -        |
| hsa-miR-181d | KCTD10   | KCTD10   | -        |
| hsa-miR-181d | KDM5A    | KDM5A    | -        |
| hsa-miR-181d | KHSRP    | KHSRP    | -        |
| hsa-miR-181d | -        | KIAA0090 | KIAA0090 |
| hsa-miR-181d | KIAA0182 | KIAA0182 | -        |
| hsa-miR-181d | -        | KIAA0196 | KIAA0196 |
| hsa-miR-181d | -        | KIAA0467 | KIAA0467 |
| hsa-miR-181d | KIAA0664 | KIAA0664 | -        |
| hsa-miR-181d | -        | KIAA0802 | KIAA0802 |
| hsa-miR-181d | KIAA1024 | KIAA1024 | -        |
| hsa-miR-181d | KIAA1239 | KIAA1239 | -        |
| hsa-miR-181d | KIAA1244 | KIAA1244 | -        |
| hsa-miR-181d | KIAA1467 | KIAA1467 | -        |
| hsa-miR-181d | -        | KIAA1632 | KIAA1632 |
| hsa-miR-181d | KIAA1715 | KIAA1715 | -        |
| hsa-miR-181d | KIAA2018 | -        | KIAA2018 |
| hsa-miR-181d | KIAA2022 | KIAA2022 | -        |
| hsa-miR-181d | KIF1B    | KIF1B    | -        |
| hsa-miR-181d | -        | KIF2C    | KIF2C    |

|              |         |           |           |
|--------------|---------|-----------|-----------|
| hsa-miR-181d | -       | KIF3A     | KIF3A     |
| hsa-miR-181d | KIF3B   | KIF3B     | -         |
| hsa-miR-181d | -       | KIR2DL1   | KIR2DL1   |
| hsa-miR-181d | KITLG   | KITLG     | -         |
| hsa-miR-181d | KLF15   | KLF15     | -         |
| hsa-miR-181d | -       | KLF17     | KLF17     |
| hsa-miR-181d | KLF3    | KLF3      | -         |
| hsa-miR-181d | KLHDC5  | KLHDC5    | -         |
| hsa-miR-181d | KLHL15  | KLHL15    | -         |
| hsa-miR-181d | KLHL29  | KLHL29    | -         |
| hsa-miR-181d | KLHL3   | KLHL3     | -         |
| hsa-miR-181d | -       | KLK13     | KLK13     |
| hsa-miR-181d | -       | KLRF1     | KLRF1     |
| hsa-miR-181d | -       | KMO       | KMO       |
| hsa-miR-181d | KPNB1   | KPNB1     | -         |
| hsa-miR-181d | KRAS    | KRAS      | -         |
| hsa-miR-181d | KREMEN1 | KREMEN1   | -         |
| hsa-miR-181d | -       | L3MBTL    | L3MBTL    |
| hsa-miR-181d | -       | LACE1     | LACE1     |
| hsa-miR-181d | LAMC1   | LAMC1     | -         |
| hsa-miR-181d | LARP4   | LARP4     | -         |
| hsa-miR-181d | -       | LAS1L     | LAS1L     |
| hsa-miR-181d | LBR     | LBR       | -         |
| hsa-miR-181d | LCLAT1  | LCLAT1    | -         |
| hsa-miR-181d | LCOR    | LCOR      | -         |
| hsa-miR-181d | LCORL   | LCORL     | -         |
| hsa-miR-181d | -       | LEFTY2    | LEFTY2    |
| hsa-miR-181d | -       | LEPRE1    | LEPRE1    |
| hsa-miR-181d | LGI2    | LGI2      | -         |
| hsa-miR-181d | LHFPL3  | LHFPL3    | -         |
| hsa-miR-181d | -       | LHX3      | LHX3      |
| hsa-miR-181d | LIF     | LIF       | -         |
| hsa-miR-181d | LIMCH1  | LIMCH1    | -         |
| hsa-miR-181d | LIMS1   | LIMS1     | -         |
| hsa-miR-181d | LIN28A  | LIN28A    | -         |
| hsa-miR-181d | LIN28B  | LIN28B    | -         |
| hsa-miR-181d | LIN7C   | LIN7C     | -         |
| hsa-miR-181d | -       | LMAN1     | LMAN1     |
| hsa-miR-181d | LMO3    | LMO3      | -         |
| hsa-miR-181d | LMTK2   | LMTK2     | -         |
| hsa-miR-181d | LNX2    | LNX2      | -         |
| hsa-miR-181d | -       | LOC728660 | LOC728660 |
| hsa-miR-181d | LPCAT1  | LPCAT1    | -         |
| hsa-miR-181d | LPCAT2  | LPCAT2    | -         |
| hsa-miR-181d | LPGAT1  | LPGAT1    | -         |
| hsa-miR-181d | LPP     | LPP       | -         |
| hsa-miR-181d | LPPR4   | LPPR4     | -         |
| hsa-miR-181d | LRP12   | LRP12     | -         |
| hsa-miR-181d | LRRC32  | LRRC32    | -         |
| hsa-miR-181d | LRRFIP1 | LRRFIP1   | -         |
| hsa-miR-181d | -       | LTV1      | LTV1      |



|              |           |           |         |
|--------------|-----------|-----------|---------|
| hsa-miR-181d | LYPLA2    | -         | LYPLA2  |
| hsa-miR-181d | LYRM1     | LYRM1     | -       |
| hsa-miR-181d | -         | LYZL1     | LYZL1   |
| hsa-miR-181d | -         | LYZL2     | LYZL2   |
| hsa-miR-181d | MADD      | MADD      | -       |
| hsa-miR-181d | -         | MAGEA4    | MAGEA4  |
| hsa-miR-181d | MAGOHB    | MAGOHB    | -       |
| hsa-miR-181d | MAP1A     | MAP1A     | -       |
| hsa-miR-181d | MAP1B     | MAP1B     | -       |
| hsa-miR-181d | MAP2K1    | MAP2K1    | -       |
| hsa-miR-181d | MAP3K10   | -         | MAP3K10 |
| hsa-miR-181d | MAP3K3    | MAP3K3    | -       |
| hsa-miR-181d | -         | MAP3K8    | MAP3K8  |
| hsa-miR-181d | MAP3K9    | MAP3K9    | -       |
| hsa-miR-181d | MAP4K4    | MAP4K4    | -       |
| hsa-miR-181d | MAPK1     | MAPK1     | -       |
| hsa-miR-181d | MAPK1IP1L | MAPK1IP1L | -       |
| hsa-miR-181d | MAPT      | MAPT      | -       |
| hsa-miR-181d | MARCKS    | MARCKS    | -       |
| hsa-miR-181d | -         | MBD4      | MBD4    |
| hsa-miR-181d | -         | MBIP      | MBIP    |
| hsa-miR-181d | MBLAC2    | MBLAC2    | -       |
| hsa-miR-181d | MBNL1     | MBNL1     | -       |
| hsa-miR-181d | MBNL2     | MBNL2     | -       |
| hsa-miR-181d | MBOAT1    | MBOAT1    | -       |
| hsa-miR-181d | MBOAT2    | MBOAT2    | -       |
| hsa-miR-181d | MBTPS2    | MBTPS2    | -       |
| hsa-miR-181d | MCC       | MCC       | -       |
| hsa-miR-181d | -         | MCM10     | MCM10   |
| hsa-miR-181d | -         | MCTP2     | MCTP2   |
| hsa-miR-181d | -         | MDH1B     | MDH1B   |
| hsa-miR-181d | MED26     | MED26     | -       |
| hsa-miR-181d | MED8      | MED8      | -       |
| hsa-miR-181d | MEF2A     | MEF2A     | -       |
| hsa-miR-181d | MEGF10    | MEGF10    | -       |
| hsa-miR-181d | MEGF9     | MEGF9     | -       |
| hsa-miR-181d | -         | MELK      | MELK    |
| hsa-miR-181d | -         | MEPE      | MEPE    |
| hsa-miR-181d | -         | MERTK     | MERTK   |
| hsa-miR-181d | MEST      | MEST      | -       |
| hsa-miR-181d | METAP1    | METAP1    | -       |
| hsa-miR-181d | METAP2    | METAP2    | -       |
| hsa-miR-181d | MEX3A     | MEX3A     | -       |
| hsa-miR-181d | MEX3B     | MEX3B     | -       |
| hsa-miR-181d | MFAP3L    | MFAP3L    | -       |
| hsa-miR-181d | MFSD6     | MFSD6     | -       |
| hsa-miR-181d | MGA       | MGA       | -       |
| hsa-miR-181d | -         | MIA2      | MIA2    |
| hsa-miR-181d | MID2      | MID2      | -       |
| hsa-miR-181d | MIER3     | MIER3     | -       |
| hsa-miR-181d | MINK1     | MINK1     | -       |

|              |          |          |         |
|--------------|----------|----------|---------|
| hsa-miR-181d | MIP      | MIP      | -       |
| hsa-miR-181d | MKRN1    | MKRN1    | -       |
| hsa-miR-181d | MLL3     | MLL3     | -       |
| hsa-miR-181d | MME      | MME      | -       |
| hsa-miR-181d | MMP14    | MMP14    | -       |
| hsa-miR-181d | -        | MMP7     | MMP7    |
| hsa-miR-181d | -        | MMP8     | MMP8    |
| hsa-miR-181d | MNX1     | MNX1     | -       |
| hsa-miR-181d | MOGS     | MOGS     | -       |
| hsa-miR-181d | -        | MOSC2    | MOSC2   |
| hsa-miR-181d | MOSPD1   | MOSPD1   | -       |
| hsa-miR-181d | MOSPD2   | MOSPD2   | -       |
| hsa-miR-181d | MPP5     | MPP5     | -       |
| hsa-miR-181d | -        | MRPL13   | MRPL13  |
| hsa-miR-181d | -        | MRPS18B  | MRPS18B |
| hsa-miR-181d | -        | MRPS23   | MRPS23  |
| hsa-miR-181d | -        | MRPS9    | MRPS9   |
| hsa-miR-181d | MSI1     | MSI1     | -       |
| hsa-miR-181d | MSL2     | MSL2     | -       |
| hsa-miR-181d | MTF1     | MTF1     | -       |
| hsa-miR-181d | MTF2     | MTF2     | -       |
| hsa-miR-181d | -        | MTMR1    | MTMR1   |
| hsa-miR-181d | MTMR10   | MTMR10   | -       |
| hsa-miR-181d | MTMR12   | MTMR12   | -       |
| hsa-miR-181d | -        | MTMR15   | MTMR15  |
| hsa-miR-181d | MTMR9    | MTMR9    | -       |
| hsa-miR-181d | MTPN     | MTPN     | -       |
| hsa-miR-181d | -        | MTX2     | MTX2    |
| hsa-miR-181d | -        | MUC13    | MUC13   |
| hsa-miR-181d | MYBL1    | MYBL1    | -       |
| hsa-miR-181d | MYCBP2   | MYCBP2   | -       |
| hsa-miR-181d | MYH10    | MYH10    | -       |
| hsa-miR-181d | -        | MYH15    | MYH15   |
| hsa-miR-181d | MYNN     | MYNN     | -       |
| hsa-miR-181d | MYO1E    | MYO1E    | -       |
| hsa-miR-181d | NAA15    | NAA15    | -       |
| hsa-miR-181d | NAA50    | NAA50    | -       |
| hsa-miR-181d | NAALADL2 | NAALADL2 | -       |
| hsa-miR-181d | NAB1     | NAB1     | -       |
| hsa-miR-181d | -        | NARG2    | NARG2   |
| hsa-miR-181d | NBEA     | NBEA     | -       |
| hsa-miR-181d | NCALD    | NCALD    | -       |
| hsa-miR-181d | NCOA2    | NCOA2    | -       |
| hsa-miR-181d | NDRG2    | NDRG2    | -       |
| hsa-miR-181d | -        | NEFH     | NEFH    |
| hsa-miR-181d | NEGR1    | NEGR1    | -       |
| hsa-miR-181d | NEK7     | NEK7     | -       |
| hsa-miR-181d | NEO1     | NEO1     | -       |
| hsa-miR-181d | NEURL1B  | NEURL1B  | -       |
| hsa-miR-181d | NFATC2IP | NFATC2IP | -       |
| hsa-miR-181d | NFIB     | NFIB     | -       |

|              |          |          |         |
|--------------|----------|----------|---------|
| hsa-miR-181d | NIPAL4   | NIPAL4   | -       |
| hsa-miR-181d | NKAIN2   | NKAIN2   | -       |
| hsa-miR-181d | NLK      | NLK      | -       |
| hsa-miR-181d | NLN      | NLN      | -       |
| hsa-miR-181d | -        | NLRP8    | NLRP8   |
| hsa-miR-181d | NMNAT2   | NMNAT2   | -       |
| hsa-miR-181d | NMT2     | NMT2     | -       |
| hsa-miR-181d | NOL4     | NOL4     | -       |
| hsa-miR-181d | -        | NOS1AP   | NOS1AP  |
| hsa-miR-181d | NOTCH2   | NOTCH2   | -       |
| hsa-miR-181d | -        | NOTCH4   | NOTCH4  |
| hsa-miR-181d | NOVA1    | NOVA1    | -       |
| hsa-miR-181d | NPTN     | NPTN     | -       |
| hsa-miR-181d | NPTXR    | NPTXR    | -       |
| hsa-miR-181d | NR1D2    | NR1D2    | -       |
| hsa-miR-181d | NR2C2    | NR2C2    | -       |
| hsa-miR-181d | NR3C1    | NR3C1    | -       |
| hsa-miR-181d | NR4A3    | NR4A3    | -       |
| hsa-miR-181d | -        | NRF1     | NRF1    |
| hsa-miR-181d | NRP1     | NRP1     | -       |
| hsa-miR-181d | NRXN1    | NRXN1    | -       |
| hsa-miR-181d | -        | NSMAF    | NSMAF   |
| hsa-miR-181d | NUCKS1   | NUCKS1   | -       |
| hsa-miR-181d | NUDT12   | NUDT12   | -       |
| hsa-miR-181d | NUS1     | NUS1     | -       |
| hsa-miR-181d | -        | OGFRL1   | OGFRL1  |
| hsa-miR-181d | OGT      | OGT      | -       |
| hsa-miR-181d | OSBPL3   | OSBPL3   | -       |
| hsa-miR-181d | OSBPL6   | OSBPL6   | -       |
| hsa-miR-181d | OSBPL8   | OSBPL8   | -       |
| hsa-miR-181d | OTUD4    | OTUD4    | -       |
| hsa-miR-181d | -        | P4HA2    | P4HA2   |
| hsa-miR-181d | -        | PABPC5   | PABPC5  |
| hsa-miR-181d | PAFAH1B1 | PAFAH1B1 | -       |
| hsa-miR-181d | PAFAH1B2 | PAFAH1B2 | -       |
| hsa-miR-181d | PAK7     | PAK7     | -       |
| hsa-miR-181d | PAM      | PAM      | -       |
| hsa-miR-181d | PAN3     | PAN3     | -       |
| hsa-miR-181d | PANK3    | PANK3    | -       |
| hsa-miR-181d | PAPD5    | PAPD5    | -       |
| hsa-miR-181d | PAPOLG   | PAPOLG   | -       |
| hsa-miR-181d | PARK2    | PARK2    | -       |
| hsa-miR-181d | PARM1    | PARM1    | -       |
| hsa-miR-181d | -        | PARN     | PARN    |
| hsa-miR-181d | PAWR     | PAWR     | -       |
| hsa-miR-181d | PAX9     | PAX9     | -       |
| hsa-miR-181d | PBX1     | PBX1     | -       |
| hsa-miR-181d | PBX3     | PBX3     | -       |
| hsa-miR-181d | -        | PCDH11Y  | PCDH11Y |
| hsa-miR-181d | -        | PCDH15   | PCDH15  |
| hsa-miR-181d | PCDHA10  | PCDHA10  | -       |

|              |         |         |         |
|--------------|---------|---------|---------|
| hsa-miR-181d | PCDHA11 | PCDHA11 | -       |
| hsa-miR-181d | PCDHA12 | PCDHA12 | -       |
| hsa-miR-181d | PCDHA13 | PCDHA13 | -       |
| hsa-miR-181d | PCDHA2  | PCDHA2  | -       |
| hsa-miR-181d | PCDHA3  | PCDHA3  | -       |
| hsa-miR-181d | PCDHA4  | PCDHA4  | -       |
| hsa-miR-181d | PCDHA5  | PCDHA5  | -       |
| hsa-miR-181d | PCDHA6  | PCDHA6  | -       |
| hsa-miR-181d | PCDHA7  | PCDHA7  | -       |
| hsa-miR-181d | PCDHA8  | PCDHA8  | -       |
| hsa-miR-181d | PCDHA9  | PCDHA9  | -       |
| hsa-miR-181d | PCDHAC1 | PCDHAC1 | -       |
| hsa-miR-181d | PCDHAC2 | PCDHAC2 | -       |
| hsa-miR-181d | PCDHB6  | PCDHB6  | -       |
| hsa-miR-181d | PCSK1   | PCSK1   | -       |
| hsa-miR-181d | -       | PCYOX1  | PCYOX1  |
| hsa-miR-181d | PDAP1   | PDAP1   | -       |
| hsa-miR-181d | PDCD6IP | PDCD6IP | -       |
| hsa-miR-181d | PDE10A  | -       | PDE10A  |
| hsa-miR-181d | PDE5A   | PDE5A   | -       |
| hsa-miR-181d | PDGFRA  | PDGFRA  | -       |
| hsa-miR-181d | -       | PDIA6   | PDIA6   |
| hsa-miR-181d | PDIK1L  | PDIK1L  | -       |
| hsa-miR-181d | PDPK1   | PDPK1   | -       |
| hsa-miR-181d | PDXDC1  | PDXDC1  | -       |
| hsa-miR-181d | -       | PEBP1   | PEBP1   |
| hsa-miR-181d | -       | PEF1    | PEF1    |
| hsa-miR-181d | PEG3    | PEG3    | -       |
| hsa-miR-181d | -       | PEX13   | PEX13   |
| hsa-miR-181d | -       | PF4V1   | PF4V1   |
| hsa-miR-181d | PGRMC2  | PGRMC2  | -       |
| hsa-miR-181d | PHACTR4 | PHACTR4 | -       |
| hsa-miR-181d | PHC3    | PHC3    | -       |
| hsa-miR-181d | PHF15   | PHF15   | -       |
| hsa-miR-181d | PHF2    | PHF2    | -       |
| hsa-miR-181d | PHKA1   | PHKA1   | -       |
| hsa-miR-181d | PHLDA1  | PHLDA1  | -       |
| hsa-miR-181d | PHLPP2  | PHLPP2  | -       |
| hsa-miR-181d | PHOX2B  | PHOX2B  | -       |
| hsa-miR-181d | PHTF2   | PHTF2   | -       |
| hsa-miR-181d | PI4K2B  | PI4K2B  | -       |
| hsa-miR-181d | PICALM  | PICALM  | -       |
| hsa-miR-181d | PIK3C2A | PIK3C2A | -       |
| hsa-miR-181d | PIK3R3  | PIK3R3  | -       |
| hsa-miR-181d | PIP4K2B | PIP4K2B | -       |
| hsa-miR-181d | PITPNB  | PITPNB  | -       |
| hsa-miR-181d | PJA2    | PJA2    | -       |
| hsa-miR-181d | PKNOX1  | PKNOX1  | -       |
| hsa-miR-181d | PKP2    | PKP2    | -       |
| hsa-miR-181d | -       | PLA2G4A | PLA2G4A |
| hsa-miR-181d | -       | PLA2G4C | PLA2G4C |

|              |          |          |          |
|--------------|----------|----------|----------|
| hsa-miR-181d | -        | PLAC8    | PLAC8    |
| hsa-miR-181d | PLAG1    | PLAG1    | -        |
| hsa-miR-181d | PLCXD3   | PLCXD3   | -        |
| hsa-miR-181d | -        | PLD1     | PLD1     |
| hsa-miR-181d | PLDN     | PLDN     | -        |
| hsa-miR-181d | PLEK     | PLEK     | -        |
| hsa-miR-181d | PLEKHA3  | PLEKHA3  | -        |
| hsa-miR-181d | -        | PNPT1    | PNPT1    |
| hsa-miR-181d | PNRC2    | PNRC2    | -        |
| hsa-miR-181d | POLA1    | POLA1    | -        |
| hsa-miR-181d | -        | POLR3F   | POLR3F   |
| hsa-miR-181d | POM121   | POM121   | -        |
| hsa-miR-181d | POM121C  | POM121C  | -        |
| hsa-miR-181d | -        | POMC     | POMC     |
| hsa-miR-181d | PPAP2B   | PPAP2B   | -        |
| hsa-miR-181d | PPARA    | PPARA    | -        |
| hsa-miR-181d | PPFIA1   | PPFIA1   | -        |
| hsa-miR-181d | PPIP5K2  | PPIP5K2  | -        |
| hsa-miR-181d | PPM1B    | PPM1B    | -        |
| hsa-miR-181d | PPP1CB   | PPP1CB   | -        |
| hsa-miR-181d | PPP1R12B | -        | PPP1R12B |
| hsa-miR-181d | PPP1R2   | PPP1R2   | -        |
| hsa-miR-181d | PPP1R3B  | PPP1R3B  | -        |
| hsa-miR-181d | PPP2R3A  | PPP2R3A  | -        |
| hsa-miR-181d | -        | PPP2R5C  | PPP2R5C  |
| hsa-miR-181d | PPP2R5E  | PPP2R5E  | -        |
| hsa-miR-181d | PPP3R1   | PPP3R1   | -        |
| hsa-miR-181d | PPP6C    | PPP6C    | -        |
| hsa-miR-181d | PQLC1    | PQLC1    | -        |
| hsa-miR-181d | -        | PRAMEF9  | PRAMEF9  |
| hsa-miR-181d | PRDM1    | PRDM1    | -        |
| hsa-miR-181d | PRDM4    | PRDM4    | -        |
| hsa-miR-181d | -        | PRDX3    | PRDX3    |
| hsa-miR-181d | PRICKLE2 | PRICKLE2 | -        |
| hsa-miR-181d | PRIMA1   | PRIMA1   | -        |
| hsa-miR-181d | PRKCD    | PRKCD    | -        |
| hsa-miR-181d | PRKCE    | PRKCE    | -        |
| hsa-miR-181d | -        | PROCR    | PROCR    |
| hsa-miR-181d | PRTG     | PRTG     | -        |
| hsa-miR-181d | PSAP     | PSAP     | -        |
| hsa-miR-181d | -        | PSG9     | PSG9     |
| hsa-miR-181d | -        | PSPC1    | PSPC1    |
| hsa-miR-181d | -        | PSRC1    | PSRC1    |
| hsa-miR-181d | PTBP2    | PTBP2    | -        |
| hsa-miR-181d | PTEN     | PTEN     | -        |
| hsa-miR-181d | -        | PTGER3   | PTGER3   |
| hsa-miR-181d | PTGR2    | PTGR2    | -        |
| hsa-miR-181d | -        | PTPN22   | PTPN22   |
| hsa-miR-181d | PTPN9    | PTPN9    | -        |
| hsa-miR-181d | PTPRB    | PTPRB    | -        |
| hsa-miR-181d | PTPRE    | PTPRE    | -        |

|              |           |           |        |
|--------------|-----------|-----------|--------|
| hsa-miR-181d | PUM1      | PUM1      | -      |
| hsa-miR-181d | PURB      | PURB      | -      |
| hsa-miR-181d | -         | PWP2      | PWP2   |
| hsa-miR-181d | -         | PXMP2     | PXMP2  |
| hsa-miR-181d | QKI       | QKI       | -      |
| hsa-miR-181d | QSER1     | QSER1     | -      |
| hsa-miR-181d | RAB11A    | RAB11A    | -      |
| hsa-miR-181d | RAB11FIP2 | RAB11FIP2 | -      |
| hsa-miR-181d | -         | RAB38     | RAB38  |
| hsa-miR-181d | RAB3GAP2  | RAB3GAP2  | -      |
| hsa-miR-181d | RAB3IP    | -         | RAB3IP |
| hsa-miR-181d | RAB8B     | RAB8B     | -      |
| hsa-miR-181d | RABGEF1   | RABGEF1   | -      |
| hsa-miR-181d | RAD23B    | RAD23B    | -      |
| hsa-miR-181d | -         | RAD51C    | RAD51C |
| hsa-miR-181d | RAI1      | RAI1      | -      |
| hsa-miR-181d | RALA      | RALA      | -      |
| hsa-miR-181d | RALGAPB   | RALGAPB   | -      |
| hsa-miR-181d | RAN       | RAN       | -      |
| hsa-miR-181d | RANBP3    | -         | RANBP3 |
| hsa-miR-181d | RAP1B     | RAP1B     | -      |
| hsa-miR-181d | RAPGEF2   | RAPGEF2   | -      |
| hsa-miR-181d | RASSF1    | RASSF1    | -      |
| hsa-miR-181d | -         | RASSF6    | RASSF6 |
| hsa-miR-181d | RASSF8    | RASSF8    | -      |
| hsa-miR-181d | RBBP7     | RBBP7     | -      |
| hsa-miR-181d | RBM22     | RBM22     | -      |
| hsa-miR-181d | RBM25     | RBM25     | -      |
| hsa-miR-181d | RBM47     | RBM47     | -      |
| hsa-miR-181d | -         | RCBTB2    | RCBTB2 |
| hsa-miR-181d | RCOR1     | RCOR1     | -      |
| hsa-miR-181d | -         | REC8      | REC8   |
| hsa-miR-181d | RECK      | RECK      | -      |
| hsa-miR-181d | -         | RECQL     | RECQL  |
| hsa-miR-181d | -         | REG4      | REG4   |
| hsa-miR-181d | -         | REPS2     | REPS2  |
| hsa-miR-181d | -         | RFC1      | RFC1   |
| hsa-miR-181d | -         | RFC3      | RFC3   |
| hsa-miR-181d | RFTN2     | RFTN2     | -      |
| hsa-miR-181d | -         | RGS13     | RGS13  |
| hsa-miR-181d | -         | RGS18     | RGS18  |
| hsa-miR-181d | -         | RGS22     | RGS22  |
| hsa-miR-181d | RIMKLB    | RIMKLB    | -      |
| hsa-miR-181d | RIN2      | RIN2      | -      |
| hsa-miR-181d | RLF       | RLF       | -      |
| hsa-miR-181d | RMND5A    | RMND5A    | -      |
| hsa-miR-181d | -         | RNASEN    | RNASEN |
| hsa-miR-181d | RNF125    | RNF125    | -      |
| hsa-miR-181d | RNF13     | RNF13     | -      |
| hsa-miR-181d | RNF144B   | RNF144B   | -      |
| hsa-miR-181d | RNF169    | RNF169    | -      |

|              |          |          |        |
|--------------|----------|----------|--------|
| hsa-miR-181d | RNF182   | RNF182   | -      |
| hsa-miR-181d | RNF43    | RNF43    | -      |
| hsa-miR-181d | -        | RNF6     | RNF6   |
| hsa-miR-181d | RNF8     | RNF8     | -      |
| hsa-miR-181d | RNMT     | RNMT     | -      |
| hsa-miR-181d | ROBO2    | ROBO2    | -      |
| hsa-miR-181d | ROD1     | ROD1     | -      |
| hsa-miR-181d | RORA     | RORA     | -      |
| hsa-miR-181d | RORB     | RORB     | -      |
| hsa-miR-181d | RP2      | RP2      | -      |
| hsa-miR-181d | -        | RPN2     | RPN2   |
| hsa-miR-181d | -        | RPS29    | RPS29  |
| hsa-miR-181d | RPS6KA3  | RPS6KA3  | -      |
| hsa-miR-181d | RPS6KB1  | RPS6KB1  | -      |
| hsa-miR-181d | RPS6KC1  | RPS6KC1  | -      |
| hsa-miR-181d | RSPO2    | RSPO2    | -      |
| hsa-miR-181d | -        | RTF1     | RTF1   |
| hsa-miR-181d | RTKN2    | RTKN2    | -      |
| hsa-miR-181d | -        | RUFY2    | RUFY2  |
| hsa-miR-181d | RUNX1    | RUNX1    | -      |
| hsa-miR-181d | RYR3     | RYR3     | -      |
| hsa-miR-181d | -        | S100Z    | S100Z  |
| hsa-miR-181d | S1PR1    | S1PR1    | -      |
| hsa-miR-181d | SAMD12   | SAMD12   | -      |
| hsa-miR-181d | -        | SAMD3    | SAMD3  |
| hsa-miR-181d | SAMD4A   | SAMD4A   | -      |
| hsa-miR-181d | SAMHD1   | SAMHD1   | -      |
| hsa-miR-181d | SCD      | SCD      | -      |
| hsa-miR-181d | SCHIP1   | SCHIP1   | -      |
| hsa-miR-181d | -        | SCN8A    | SCN8A  |
| hsa-miR-181d | SCN9A    | SCN9A    | -      |
| hsa-miR-181d | -        | SEC11A   | SEC11A |
| hsa-miR-181d | -        | SEC22A   | SEC22A |
| hsa-miR-181d | -        | SEC24D   | SEC24D |
| hsa-miR-181d | SECISBP2 | SECISBP2 | -      |
| hsa-miR-181d | SEL1L    | SEL1L    | -      |
| hsa-miR-181d | SEPT3    | SEPT3    | -      |
| hsa-miR-181d | SERTAD2  | SERTAD2  | -      |
| hsa-miR-181d | SF1      | SF1      | -      |
| hsa-miR-181d | SFRP4    | SFRP4    | -      |
| hsa-miR-181d | -        | SFRS5    | SFRS5  |
| hsa-miR-181d | -        | SFT2D1   | SFT2D1 |
| hsa-miR-181d | -        | SGCE     | SGCE   |
| hsa-miR-181d | SGK3     | SGK3     | -      |
| hsa-miR-181d | SH2B3    | SH2B3    | -      |
| hsa-miR-181d | SHOC2    | SHOC2    | -      |
| hsa-miR-181d | -        | SHQ1     | SHQ1   |
| hsa-miR-181d | -        | SIAE     | SIAE   |
| hsa-miR-181d | SIK3     | SIK3     | -      |
| hsa-miR-181d | SIN3B    | SIN3B    | -      |
| hsa-miR-181d | SIRT1    | SIRT1    | -      |

|              |          |          |         |
|--------------|----------|----------|---------|
| hsa-miR-181d | SIX2     | SIX2     | -       |
| hsa-miR-181d | SIX4     | SIX4     | -       |
| hsa-miR-181d | SLA      | SLA      | -       |
| hsa-miR-181d | -        | SLAIN1   | SLAIN1  |
| hsa-miR-181d | SLAIN2   | SLAIN2   | -       |
| hsa-miR-181d | -        | SLAMF7   | SLAMF7  |
| hsa-miR-181d | SLC10A7  | SLC10A7  | -       |
| hsa-miR-181d | SLC12A5  | SLC12A5  | -       |
| hsa-miR-181d | SLC19A2  | SLC19A2  | -       |
| hsa-miR-181d | -        | SLC22A2  | SLC22A2 |
| hsa-miR-181d | SLC25A25 | SLC25A25 | -       |
| hsa-miR-181d | SLC25A36 | SLC25A36 | -       |
| hsa-miR-181d | SLC26A4  | SLC26A4  | -       |
| hsa-miR-181d | SLC26A9  | SLC26A9  | -       |
| hsa-miR-181d | SLC2A3   | SLC2A3   | -       |
| hsa-miR-181d | -        | SLC35C2  | SLC35C2 |
| hsa-miR-181d | -        | SLC35D2  | SLC35D2 |
| hsa-miR-181d | SLC35F1  | SLC35F1  | -       |
| hsa-miR-181d | SLC38A2  | SLC38A2  | -       |
| hsa-miR-181d | -        | SLC3A1   | SLC3A1  |
| hsa-miR-181d | SLC4A10  | SLC4A10  | -       |
| hsa-miR-181d | SLC6A2   | -        | SLC6A2  |
| hsa-miR-181d | SLC7A11  | SLC7A11  | -       |
| hsa-miR-181d | -        | SLC7A13  | SLC7A13 |
| hsa-miR-181d | SLC7A6OS | SLC7A6OS | -       |
| hsa-miR-181d | SLC9A6   | SLC9A6   | -       |
| hsa-miR-181d | -        | SLIT2    | SLIT2   |
| hsa-miR-181d | SLITRK1  | SLITRK1  | -       |
| hsa-miR-181d | -        | SLITRK2  | SLITRK2 |
| hsa-miR-181d | -        | SLMAP    | SLMAP   |
| hsa-miR-181d | SMAD7    | SMAD7    | -       |
| hsa-miR-181d | -        | SMC2     | SMC2    |
| hsa-miR-181d | -        | SNAP25   | SNAP25  |
| hsa-miR-181d | SNN      | SNN      | -       |
| hsa-miR-181d | -        | SNX5     | SNX5    |
| hsa-miR-181d | -        | SOAT2    | SOAT2   |
| hsa-miR-181d | SOCS4    | SOCS4    | -       |
| hsa-miR-181d | -        | SOX17    | SOX17   |
| hsa-miR-181d | SOX5     | SOX5     | -       |
| hsa-miR-181d | SOX6     | SOX6     | -       |
| hsa-miR-181d | -        | SP140    | SP140   |
| hsa-miR-181d | SPAG9    | SPAG9    | -       |
| hsa-miR-181d | -        | SPATA4   | SPATA4  |
| hsa-miR-181d | -        | SPG21    | SPG21   |
| hsa-miR-181d | SPIRE1   | SPIRE1   | -       |
| hsa-miR-181d | SPRY4    | SPRY4    | -       |
| hsa-miR-181d | -        | SPTLC1   | SPTLC1  |
| hsa-miR-181d | SRGAP2   | SRGAP2   | -       |
| hsa-miR-181d | -        | SRGN     | SRGN    |
| hsa-miR-181d | SRPK2    | SRPK2    | -       |
| hsa-miR-181d | SS18L1   | SS18L1   | -       |



|              |         |            |            |
|--------------|---------|------------|------------|
| hsa-miR-181d | -       | SS18L2     | SS18L2     |
| hsa-miR-181d | -       | SSB        | SSB        |
| hsa-miR-181d | SSX2IP  | SSX2IP     | -          |
| hsa-miR-181d | -       | ST6GALNAC5 | ST6GALNAC5 |
| hsa-miR-181d | ST8SIA3 | -          | ST8SIA3    |
| hsa-miR-181d | ST8SIA4 | ST8SIA4    | -          |
| hsa-miR-181d | -       | STAG2      | STAG2      |
| hsa-miR-181d | STAU1   | STAU1      | -          |
| hsa-miR-181d | STC2    | STC2       | -          |
| hsa-miR-181d | STIM2   | STIM2      | -          |
| hsa-miR-181d | STK10   | STK10      | -          |
| hsa-miR-181d | -       | STK32C     | STK32C     |
| hsa-miR-181d | -       | STX12      | STX12      |
| hsa-miR-181d | SUDS3   | SUDS3      | -          |
| hsa-miR-181d | -       | SUSD5      | SUSD5      |
| hsa-miR-181d | SYNC    | SYNC       | -          |
| hsa-miR-181d | -       | SYT15      | SYT15      |
| hsa-miR-181d | SYT3    | SYT3       | -          |
| hsa-miR-181d | TAB3    | TAB3       | -          |
| hsa-miR-181d | TADA2B  | TADA2B     | -          |
| hsa-miR-181d | -       | TAF15      | TAF15      |
| hsa-miR-181d | -       | TAF1A      | TAF1A      |
| hsa-miR-181d | -       | TAF9       | TAF9       |
| hsa-miR-181d | TAF9B   | TAF9B      | -          |
| hsa-miR-181d | TANC2   | TANC2      | -          |
| hsa-miR-181d | TAOK1   | TAOK1      | -          |
| hsa-miR-181d | TARDBP  | TARDBP     | -          |
| hsa-miR-181d | TBC1D1  | TBC1D1     | -          |
| hsa-miR-181d | TBC1D14 | TBC1D14    | -          |
| hsa-miR-181d | TBC1D2B | TBC1D2B    | -          |
| hsa-miR-181d | TBC1D9  | TBC1D9     | -          |
| hsa-miR-181d | -       | TBCD       | TBCD       |
| hsa-miR-181d | TBCEL   | TBCEL      | -          |
| hsa-miR-181d | TBL1X   | TBL1X      | -          |
| hsa-miR-181d | -       | TBP        | TBP        |
| hsa-miR-181d | -       | TBXA2R     | TBXA2R     |
| hsa-miR-181d | TCERG1  | TCERG1     | -          |
| hsa-miR-181d | TCF7L2  | TCF7L2     | -          |
| hsa-miR-181d | -       | TEKT2      | TEKT2      |
| hsa-miR-181d | -       | TGFBI      | TGFBI      |
| hsa-miR-181d | TGFBR1  | TGFBR1     | -          |
| hsa-miR-181d | TGFBR2  | TGFBR2     | -          |
| hsa-miR-181d | TGFBR3  | TGFBR3     | -          |
| hsa-miR-181d | TGIF2   | TGIF2      | -          |
| hsa-miR-181d | -       | THAP4      | THAP4      |
| hsa-miR-181d | -       | THOC7      | THOC7      |
| hsa-miR-181d | THRB    | THRB       | -          |
| hsa-miR-181d | -       | TIAL1      | TIAL1      |
| hsa-miR-181d | -       | TIMELESS   | TIMELESS   |
| hsa-miR-181d | TIMP3   | TIMP3      | -          |
| hsa-miR-181d | -       | TLE4       | TLE4       |

|              |          |          |          |
|--------------|----------|----------|----------|
| hsa-miR-181d | TLK2     | TLK2     | -        |
| hsa-miR-181d | TLL1     | TLL1     | -        |
| hsa-miR-181d | TM9SF3   | TM9SF3   | -        |
| hsa-miR-181d | -        | TMC1     | TMC1     |
| hsa-miR-181d | TMCC1    | TMCC1    | -        |
| hsa-miR-181d | -        | TMCO3    | TMCO3    |
| hsa-miR-181d | TMED5    | TMED5    | -        |
| hsa-miR-181d | -        | TMEM126B | TMEM126B |
| hsa-miR-181d | TMEM127  | TMEM127  | -        |
| hsa-miR-181d | TMEM132B | TMEM132B | -        |
| hsa-miR-181d | TMEM132D | TMEM132D | -        |
| hsa-miR-181d | TMEM135  | TMEM135  | -        |
| hsa-miR-181d | TMEM151B | TMEM151B | -        |
| hsa-miR-181d | -        | TMEM18   | TMEM18   |
| hsa-miR-181d | -        | TMEM181  | TMEM181  |
| hsa-miR-181d | TMEM196  | TMEM196  | -        |
| hsa-miR-181d | -        | TMEM22   | TMEM22   |
| hsa-miR-181d | -        | TMEM41A  | TMEM41A  |
| hsa-miR-181d | -        | TMEM45A  | TMEM45A  |
| hsa-miR-181d | TMEM47   | TMEM47   | -        |
| hsa-miR-181d | TMEM64   | TMEM64   | -        |
| hsa-miR-181d | TMEM71   | TMEM71   | -        |
| hsa-miR-181d | TMEM87B  | TMEM87B  | -        |
| hsa-miR-181d | TMEM9B   | TMEM9B   | -        |
| hsa-miR-181d | TMX3     | TMX3     | -        |
| hsa-miR-181d | TNF      | TNF      | -        |
| hsa-miR-181d | TNFAIP1  | TNFAIP1  | -        |
| hsa-miR-181d | -        | TNFAIP6  | TNFAIP6  |
| hsa-miR-181d | TNP1     | TNP1     | -        |
| hsa-miR-181d | TNPO1    | TNPO1    | -        |
| hsa-miR-181d | TNS1     | TNS1     | -        |
| hsa-miR-181d | TNS3     | TNS3     | -        |
| hsa-miR-181d | TOM1L1   | TOM1L1   | -        |
| hsa-miR-181d | -        | TOPBP1   | TOPBP1   |
| hsa-miR-181d | TOR1AIP2 | TOR1AIP2 | -        |
| hsa-miR-181d | TOX      | TOX      | -        |
| hsa-miR-181d | -        | TPRX1    | TPRX1    |
| hsa-miR-181d | TRAK1    | TRAK1    | -        |
| hsa-miR-181d | TRAK2    | TRAK2    | -        |
| hsa-miR-181d | TRDMT1   | TRDMT1   | -        |
| hsa-miR-181d | TRERF1   | TRERF1   | -        |
| hsa-miR-181d | TRIM2    | TRIM2    | -        |
| hsa-miR-181d | TRIM3    | -        | TRIM3    |
| hsa-miR-181d | TRIM71   | TRIM71   | -        |
| hsa-miR-181d | TRNP1    | TRNP1    | -        |
| hsa-miR-181d | TRPM3    | TRPM3    | -        |
| hsa-miR-181d | TRPM7    | TRPM7    | -        |
| hsa-miR-181d | TRRAP    | TRRAP    | -        |
| hsa-miR-181d | TSC22D2  | TSC22D2  | -        |
| hsa-miR-181d | -        | TSG101   | TSG101   |
| hsa-miR-181d | -        | TSPAN8   | TSPAN8   |

|              |         |         |         |
|--------------|---------|---------|---------|
| hsa-miR-181d | TTC39A  | TTC39A  | -       |
| hsa-miR-181d | -       | TUBAL3  | TUBAL3  |
| hsa-miR-181d | TUBB    | TUBB    | -       |
| hsa-miR-181d | TULP4   | TULP4   | -       |
| hsa-miR-181d | TUSC5   | TUSC5   | -       |
| hsa-miR-181d | -       | TWISTNB | TWISTNB |
| hsa-miR-181d | TXK     | TXK     | -       |
| hsa-miR-181d | TXNDC12 | TXNDC12 | -       |
| hsa-miR-181d | TXNDC15 | TXNDC15 | -       |
| hsa-miR-181d | -       | TXNDC3  | TXNDC3  |
| hsa-miR-181d | -       | UBAC2   | UBAC2   |
| hsa-miR-181d | UBE2B   | UBE2B   | -       |
| hsa-miR-181d | UBE2J1  | UBE2J1  | -       |
| hsa-miR-181d | UBE2W   | UBE2W   | -       |
| hsa-miR-181d | UBE3C   | UBE3C   | -       |
| hsa-miR-181d | UBL3    | UBL3    | -       |
| hsa-miR-181d | UBP1    | UBP1    | -       |
| hsa-miR-181d | -       | UGT8    | UGT8    |
| hsa-miR-181d | UNC5A   | UNC5A   | -       |
| hsa-miR-181d | UNC80   | UNC80   | -       |
| hsa-miR-181d | UNKL    | UNKL    | -       |
| hsa-miR-181d | -       | UPB1    | UPB1    |
| hsa-miR-181d | USP15   | USP15   | -       |
| hsa-miR-181d | USP33   | USP33   | -       |
| hsa-miR-181d | USP42   | USP42   | -       |
| hsa-miR-181d | USP47   | USP47   | -       |
| hsa-miR-181d | USP6NL  | USP6NL  | -       |
| hsa-miR-181d | USP9X   | USP9X   | -       |
| hsa-miR-181d | USP9Y   | USP9Y   | -       |
| hsa-miR-181d | -       | USPL1   | USPL1   |
| hsa-miR-181d | VANGL1  | VANGL1  | -       |
| hsa-miR-181d | VAX1    | VAX1    | -       |
| hsa-miR-181d | -       | VBP1    | VBP1    |
| hsa-miR-181d | -       | VCAM1   | VCAM1   |
| hsa-miR-181d | VCAN    | VCAN    | -       |
| hsa-miR-181d | -       | VCX     | VCX     |
| hsa-miR-181d | -       | VCX2    | VCX2    |
| hsa-miR-181d | -       | VCX3A   | VCX3A   |
| hsa-miR-181d | -       | VCX3B   | VCX3B   |
| hsa-miR-181d | -       | VNN2    | VNN2    |
| hsa-miR-181d | VPS24   | VPS24   | -       |
| hsa-miR-181d | WDFY3   | WDFY3   | -       |
| hsa-miR-181d | -       | WDR36   | WDR36   |
| hsa-miR-181d | WDR37   | WDR37   | -       |
| hsa-miR-181d | WDR82   | WDR82   | -       |
| hsa-miR-181d | -       | WFDC8   | WFDC8   |
| hsa-miR-181d | WHAMM   | WHAMM   | -       |
| hsa-miR-181d | WHSC1   | WHSC1   | -       |
| hsa-miR-181d | -       | WHSC2   | WHSC2   |
| hsa-miR-181d | -       | WIF1    | WIF1    |
| hsa-miR-181d | WNK1    | WNK1    | -       |

|              |         |         |         |
|--------------|---------|---------|---------|
| hsa-miR-181d | WSB1    | WSB1    | -       |
| hsa-miR-181d | -       | WTAP    | WTAP    |
| hsa-miR-181d | -       | XKR3    | XKR3    |
| hsa-miR-181d | XPO7    | XPO7    | -       |
| hsa-miR-181d | XRN1    | XRN1    | -       |
| hsa-miR-181d | YLPM1   | YLPM1   | -       |
| hsa-miR-181d | -       | YPEL1   | YPEL1   |
| hsa-miR-181d | YTHDC1  | YTHDC1  | -       |
| hsa-miR-181d | YTHDC2  | YTHDC2  | -       |
| hsa-miR-181d | YTHDF2  | YTHDF2  | -       |
| hsa-miR-181d | YTHDF3  | YTHDF3  | -       |
| hsa-miR-181d | YWHAB   | YWHAB   | -       |
| hsa-miR-181d | YWHAG   | YWHAG   | -       |
| hsa-miR-181d | YWHAZ   | YWHAZ   | -       |
| hsa-miR-181d | YY1     | YY1     | -       |
| hsa-miR-181d | ZADH2   | ZADH2   | -       |
| hsa-miR-181d | -       | ZBP1    | ZBP1    |
| hsa-miR-181d | ZBTB33  | ZBTB33  | -       |
| hsa-miR-181d | ZBTB34  | ZBTB34  | -       |
| hsa-miR-181d | ZBTB4   | ZBTB4   | -       |
| hsa-miR-181d | ZBTB41  | ZBTB41  | -       |
| hsa-miR-181d | ZBTB43  | ZBTB43  | -       |
| hsa-miR-181d | -       | ZC3H11A | ZC3H11A |
| hsa-miR-181d | ZC3H6   | ZC3H6   | -       |
| hsa-miR-181d | ZCCHC14 | ZCCHC14 | -       |
| hsa-miR-181d | ZCCHC3  | ZCCHC3  | -       |
| hsa-miR-181d | ZEB2    | ZEB2    | -       |
| hsa-miR-181d | ZFHX4   | ZFHX4   | -       |
| hsa-miR-181d | ZFP14   | ZFP14   | -       |
| hsa-miR-181d | ZFP30   | ZFP30   | -       |
| hsa-miR-181d | ZFP36L1 | ZFP36L1 | -       |
| hsa-miR-181d | ZFP36L2 | ZFP36L2 | -       |
| hsa-miR-181d | ZFP62   | ZFP62   | -       |
| hsa-miR-181d | ZFP82   | ZFP82   | -       |
| hsa-miR-181d | ZIC3    | ZIC3    | -       |
| hsa-miR-181d | ZKSCAN1 | ZKSCAN1 | -       |
| hsa-miR-181d | -       | ZKSCAN3 | ZKSCAN3 |
| hsa-miR-181d | -       | ZMYM2   | ZMYM2   |
| hsa-miR-181d | ZMYND11 | ZMYND11 | -       |
| hsa-miR-181d | -       | ZNF121  | ZNF121  |
| hsa-miR-181d | -       | ZNF124  | ZNF124  |
| hsa-miR-181d | ZNF136  | ZNF136  | -       |
| hsa-miR-181d | -       | ZNF140  | ZNF140  |
| hsa-miR-181d | ZNF200  | ZNF200  | -       |
| hsa-miR-181d | -       | ZNF207  | ZNF207  |
| hsa-miR-181d | ZNF236  | ZNF236  | -       |
| hsa-miR-181d | -       | ZNF252  | ZNF252  |
| hsa-miR-181d | -       | ZNF253  | ZNF253  |
| hsa-miR-181d | -       | ZNF274  | ZNF274  |
| hsa-miR-181d | ZNF280B | ZNF280B | -       |
| hsa-miR-181d | ZNF280D | ZNF280D | -       |

|              |         |         |         |
|--------------|---------|---------|---------|
| hsa-miR-181d | ZNF286A | ZNF286A | -       |
| hsa-miR-181d | ZNF292  | ZNF292  | -       |
| hsa-miR-181d | ZNF295  | ZNF295  | -       |
| hsa-miR-181d | -       | ZNF329  | ZNF329  |
| hsa-miR-181d | ZNF33B  | ZNF33B  | -       |
| hsa-miR-181d | ZNF345  | ZNF345  | -       |
| hsa-miR-181d | -       | ZNF418  | ZNF418  |
| hsa-miR-181d | -       | ZNF420  | ZNF420  |
| hsa-miR-181d | -       | ZNF441  | ZNF441  |
| hsa-miR-181d | -       | ZNF443  | ZNF443  |
| hsa-miR-181d | ZNF449  | ZNF449  | -       |
| hsa-miR-181d | -       | ZNF454  | ZNF454  |
| hsa-miR-181d | ZNF470  | ZNF470  | -       |
| hsa-miR-181d | -       | ZNF479  | ZNF479  |
| hsa-miR-181d | -       | ZNF487  | ZNF487  |
| hsa-miR-181d | -       | ZNF514  | ZNF514  |
| hsa-miR-181d | ZNF527  | ZNF527  | -       |
| hsa-miR-181d | -       | ZNF550  | ZNF550  |
| hsa-miR-181d | ZNF563  | ZNF563  | -       |
| hsa-miR-181d | ZNF568  | ZNF568  | -       |
| hsa-miR-181d | -       | ZNF569  | ZNF569  |
| hsa-miR-181d | ZNF571  | ZNF571  | -       |
| hsa-miR-181d | -       | ZNF586  | ZNF586  |
| hsa-miR-181d | ZNF654  | ZNF654  | -       |
| hsa-miR-181d | ZNF655  | ZNF655  | -       |
| hsa-miR-181d | ZNF664  | ZNF664  | -       |
| hsa-miR-181d | -       | ZNF677  | ZNF677  |
| hsa-miR-181d | -       | ZNF678  | ZNF678  |
| hsa-miR-181d | ZNF697  | ZNF697  | -       |
| hsa-miR-181d | -       | ZNF700  | ZNF700  |
| hsa-miR-181d | ZNF704  | ZNF704  | -       |
| hsa-miR-181d | -       | ZNF750  | ZNF750  |
| hsa-miR-181d | ZNF780A | ZNF780A | -       |
| hsa-miR-181d | ZNF780B | ZNF780B | -       |
| hsa-miR-181d | -       | ZNF799  | ZNF799  |
| hsa-miR-181d | ZNF800  | ZNF800  | -       |
| hsa-miR-181d | ZNF814  | ZNF814  | -       |
| hsa-miR-181d | -       | ZNRF2   | ZNRF2   |
| hsa-miR-181d | -       | ZSCAN23 | ZSCAN23 |
| hsa-miR-181d | -       | ZSWIM2  | ZSWIM2  |
| hsa-miR-18a  | -       | ABCC3   | ABCC3   |
| hsa-miR-18a  | -       | ACAD11  | ACAD11  |
| hsa-miR-18a  | -       | ACAD8   | ACAD8   |
| hsa-miR-18a  | -       | ACTL6A  | ACTL6A  |
| hsa-miR-18a  | -       | ADAMTS4 | ADAMTS4 |
| hsa-miR-18a  | ADAMTS9 | ADAMTS9 | -       |
| hsa-miR-18a  | ADAT2   | ADAT2   | -       |
| hsa-miR-18a  | ADD3    | ADD3    | -       |
| hsa-miR-18a  | AEBP2   | AEBP2   | -       |
| hsa-miR-18a  | AKR1D1  | AKR1D1  | -       |
| hsa-miR-18a  | ALCAM   | ALCAM   | -       |

|             |          |          |          |
|-------------|----------|----------|----------|
| hsa-miR-18a | -        | ALDH1L1  | ALDH1L1  |
| hsa-miR-18a | ANK3     | ANK3     | -        |
| hsa-miR-18a | -        | ANKMY1   | ANKMY1   |
| hsa-miR-18a | -        | ANKRD10  | ANKRD10  |
| hsa-miR-18a | ANKRD13C | ANKRD13C | -        |
| hsa-miR-18a | -        | ANKRD44  | ANKRD44  |
| hsa-miR-18a | ANKRD50  | ANKRD50  | -        |
| hsa-miR-18a | -        | ANUBL1   | ANUBL1   |
| hsa-miR-18a | -        | ANXA13   | ANXA13   |
| hsa-miR-18a | -        | ANXA7    | ANXA7    |
| hsa-miR-18a | -        | AP3S1    | AP3S1    |
| hsa-miR-18a | -        | AQP1     | AQP1     |
| hsa-miR-18a | -        | AS3MT    | AS3MT    |
| hsa-miR-18a | ASXL2    | ASXL2    | -        |
| hsa-miR-18a | ATM      | ATM      | -        |
| hsa-miR-18a | -        | ATP12A   | ATP12A   |
| hsa-miR-18a | -        | ATP2C2   | ATP2C2   |
| hsa-miR-18a | ATP8A1   | ATP8A1   | -        |
| hsa-miR-18a | ATXN1    | ATXN1    | -        |
| hsa-miR-18a | ATXN7L1  | ATXN7L1  | -        |
| hsa-miR-18a | -        | BBS9     | BBS9     |
| hsa-miR-18a | BBX      | BBX      | -        |
| hsa-miR-18a | -        | BCCIP    | BCCIP    |
| hsa-miR-18a | -        | BCKDK    | BCKDK    |
| hsa-miR-18a | -        | BCL2L10  | BCL2L10  |
| hsa-miR-18a | BEND3    | BEND3    | -        |
| hsa-miR-18a | -        | BEX1     | BEX1     |
| hsa-miR-18a | BHLHE22  | BHLHE22  | -        |
| hsa-miR-18a | -        | BHMT2    | BHMT2    |
| hsa-miR-18a | -        | BNIP1    | BNIP1    |
| hsa-miR-18a | BRWD1    | BRWD1    | -        |
| hsa-miR-18a | BRWD3    | BRWD3    | -        |
| hsa-miR-18a | -        | BTG4     | BTG4     |
| hsa-miR-18a | -        | BTN1A1   | BTN1A1   |
| hsa-miR-18a | -        | BUB3     | BUB3     |
| hsa-miR-18a | -        | C10orf95 | C10orf95 |
| hsa-miR-18a | C13orf30 | C13orf30 | -        |
| hsa-miR-18a | -        | C18orf20 | C18orf20 |
| hsa-miR-18a | -        | C19orf10 | C19orf10 |
| hsa-miR-18a | -        | C1orf105 | C1orf105 |
| hsa-miR-18a | C1orf9   | C1orf9   | -        |
| hsa-miR-18a | -        | C1orf93  | C1orf93  |
| hsa-miR-18a | -        | C20orf30 | C20orf30 |
| hsa-miR-18a | C5orf13  | C5orf13  | -        |
| hsa-miR-18a | C5orf30  | C5orf30  | -        |
| hsa-miR-18a | -        | C6orf154 | C6orf154 |
| hsa-miR-18a | C6orf225 | C6orf225 | -        |
| hsa-miR-18a | -        | C6orf48  | C6orf48  |
| hsa-miR-18a | CACNB3   | -        | CACNB3   |
| hsa-miR-18a | -        | CAD      | CAD      |
| hsa-miR-18a | CADM2    | CADM2    | -        |

|             |         |         |         |
|-------------|---------|---------|---------|
| hsa-miR-18a | -       | CALCB   | CALCB   |
| hsa-miR-18a | -       | CAMK2N1 | CAMK2N1 |
| hsa-miR-18a | CAMKK2  | CAMKK2  | -       |
| hsa-miR-18a | -       | CASP4   | CASP4   |
| hsa-miR-18a | -       | CBX2    | CBX2    |
| hsa-miR-18a | CCDC88A | CCDC88A | -       |
| hsa-miR-18a | CCND2   | CCND2   | -       |
| hsa-miR-18a | -       | CCPG1   | CCPG1   |
| hsa-miR-18a | -       | CCR3    | CCR3    |
| hsa-miR-18a | CDK19   | CDK19   | -       |
| hsa-miR-18a | -       | CEP72   | CEP72   |
| hsa-miR-18a | CLCC1   | CLCC1   | -       |
| hsa-miR-18a | CLCN4   | CLCN4   | -       |
| hsa-miR-18a | -       | CNOT6L  | CNOT6L  |
| hsa-miR-18a | -       | CNTN4   | CNTN4   |
| hsa-miR-18a | CNTNAP1 | CNTNAP1 | -       |
| hsa-miR-18a | -       | CPXM1   | CPXM1   |
| hsa-miR-18a | CREBL2  | CREBL2  | -       |
| hsa-miR-18a | CRIM1   | CRIM1   | -       |
| hsa-miR-18a | CSDA    | CSDA    | -       |
| hsa-miR-18a | CSRNP3  | CSRNP3  | -       |
| hsa-miR-18a | CTDSPL  | CTDSPL  | -       |
| hsa-miR-18a | CTGF    | CTGF    | -       |
| hsa-miR-18a | -       | CTNNA3  | CTNNA3  |
| hsa-miR-18a | -       | CTNBL1  | CTNBL1  |
| hsa-miR-18a | -       | CTSF    | CTSF    |
| hsa-miR-18a | -       | CYP39A1 | CYP39A1 |
| hsa-miR-18a | DAAM2   | DAAM2   | -       |
| hsa-miR-18a | -       | DACT2   | DACT2   |
| hsa-miR-18a | -       | DAK     | DAK     |
| hsa-miR-18a | DDX18   | DDX18   | -       |
| hsa-miR-18a | DICER1  | DICER1  | -       |
| hsa-miR-18a | DIP2C   | DIP2C   | -       |
| hsa-miR-18a | DIRAS2  | DIRAS2  | -       |
| hsa-miR-18a | -       | DNAI1   | DNAI1   |
| hsa-miR-18a | -       | DNAJC1  | DNAJC1  |
| hsa-miR-18a | -       | DNAJC8  | DNAJC8  |
| hsa-miR-18a | DOCK4   | DOCK4   | -       |
| hsa-miR-18a | -       | DOK2    | DOK2    |
| hsa-miR-18a | DPP10   | DPP10   | -       |
| hsa-miR-18a | -       | DPPA3   | DPPA3   |
| hsa-miR-18a | -       | DR1     | DR1     |
| hsa-miR-18a | -       | DRG1    | DRG1    |
| hsa-miR-18a | -       | DSG4    | DSG4    |
| hsa-miR-18a | -       | DTNB    | DTNB    |
| hsa-miR-18a | -       | ECHS1   | ECHS1   |
| hsa-miR-18a | -       | EGLN2   | EGLN2   |
| hsa-miR-18a | EHMT1   | EHMT1   | -       |
| hsa-miR-18a | -       | EIF4G3  | EIF4G3  |
| hsa-miR-18a | ENC1    | ENC1    | -       |
| hsa-miR-18a | ENDOD1  | ENDOD1  | -       |

|             |         |         |        |
|-------------|---------|---------|--------|
| hsa-miR-18a | EPB41L1 | EPB41L1 | -      |
| hsa-miR-18a | -       | EPDR1   | EPDR1  |
| hsa-miR-18a | ERI1    | ERI1    | -      |
| hsa-miR-18a | -       | ESCO2   | ESCO2  |
| hsa-miR-18a | ETV6    | ETV6    | -      |
| hsa-miR-18a | -       | EXOSC9  | EXOSC9 |
| hsa-miR-18a | EXPH5   | EXPH5   | -      |
| hsa-miR-18a | FAM136A | FAM136A | -      |
| hsa-miR-18a | FAM166B | FAM166B | -      |
| hsa-miR-18a | FAM192A | FAM192A | -      |
| hsa-miR-18a | -       | FAM26D  | FAM26D |
| hsa-miR-18a | FAM3C   | FAM3C   | -      |
| hsa-miR-18a | -       | FANCG   | FANCG  |
| hsa-miR-18a | -       | FBP1    | FBP1   |
| hsa-miR-18a | -       | FBP2    | FBP2   |
| hsa-miR-18a | FBXL3   | FBXL3   | -      |
| hsa-miR-18a | -       | FBXL7   | FBXL7  |
| hsa-miR-18a | FBXO28  | FBXO28  | -      |
| hsa-miR-18a | FCHSD2  | FCHSD2  | -      |
| hsa-miR-18a | -       | FGD4    | FGD4   |
| hsa-miR-18a | FGF1    | FGF1    | -      |
| hsa-miR-18a | -       | FGFR2   | FGFR2  |
| hsa-miR-18a | FGFR3   | FGFR3   | -      |
| hsa-miR-18a | FNBP1   | FNBP1   | -      |
| hsa-miR-18a | FNDC3B  | FNDC3B  | -      |
| hsa-miR-18a | FRYL    | FRYL    | -      |
| hsa-miR-18a | -       | GAPDH   | GAPDH  |
| hsa-miR-18a | GCLC    | GCLC    | -      |
| hsa-miR-18a | -       | GCM2    | GCM2   |
| hsa-miR-18a | GIGYF1  | GIGYF1  | -      |
| hsa-miR-18a | GIGYF2  | GIGYF2  | -      |
| hsa-miR-18a | -       | GJB5    | GJB5   |
| hsa-miR-18a | -       | GLI3    | GLI3   |
| hsa-miR-18a | -       | GNA11   | GNA11  |
| hsa-miR-18a | -       | GNAS    | GNAS   |
| hsa-miR-18a | -       | GNG2    | GNG2   |
| hsa-miR-18a | -       | GNL3L   | GNL3L  |
| hsa-miR-18a | -       | GPR173  | GPR173 |
| hsa-miR-18a | -       | GPRIN2  | GPRIN2 |
| hsa-miR-18a | -       | HAGH    | HAGH   |
| hsa-miR-18a | HCFC2   | HCFC2   | -      |
| hsa-miR-18a | -       | HHLA3   | HHLA3  |
| hsa-miR-18a | -       | HIVEP2  | HIVEP2 |
| hsa-miR-18a | HLF     | HLF     | -      |
| hsa-miR-18a | HMBOX1  | HMBOX1  | -      |
| hsa-miR-18a | HMG20B  | HMG20B  | -      |
| hsa-miR-18a | HMGCS1  | HMGCS1  | -      |
| hsa-miR-18a | HSF5    | HSF5    | -      |
| hsa-miR-18a | HTR1D   | HTR1D   | -      |
| hsa-miR-18a | -       | IDH3G   | IDH3G  |
| hsa-miR-18a | -       | IFNA1   | IFNA1  |



|             |           |           |          |
|-------------|-----------|-----------|----------|
| hsa-miR-18a | -         | IFNA2     | IFNA2    |
| hsa-miR-18a | IGF2BP2   | IGF2BP2   | -        |
| hsa-miR-18a | -         | IGF2R     | IGF2R    |
| hsa-miR-18a | -         | IL10RB    | IL10RB   |
| hsa-miR-18a | -         | IL17B     | IL17B    |
| hsa-miR-18a | -         | IL9R      | IL9R     |
| hsa-miR-18a | INADL     | INADL     | -        |
| hsa-miR-18a | -         | INPP5F    | INPP5F   |
| hsa-miR-18a | INPPL1    | INPPL1    | -        |
| hsa-miR-18a | -         | IPO7      | IPO7     |
| hsa-miR-18a | -         | IQSEC3    | IQSEC3   |
| hsa-miR-18a | ISM1      | ISM1      | -        |
| hsa-miR-18a | -         | ITGA2     | ITGA2    |
| hsa-miR-18a | -         | ITGAD     | ITGAD    |
| hsa-miR-18a | -         | ITSN1     | ITSN1    |
| hsa-miR-18a | JAKMIP3   | JAKMIP3   | -        |
| hsa-miR-18a | JMY       | JMY       | -        |
| hsa-miR-18a | -         | KAAG1     | KAAG1    |
| hsa-miR-18a | KCNA1     | KCNA1     | -        |
| hsa-miR-18a | KCNJ2     | KCNJ2     | -        |
| hsa-miR-18a | KDM2A     | KDM2A     | -        |
| hsa-miR-18a | KDM5B     | KDM5B     | -        |
| hsa-miR-18a | KIAA0513  | KIAA0513  | -        |
| hsa-miR-18a | KIAA0907  | KIAA0907  | -        |
| hsa-miR-18a | -         | KIAA1012  | KIAA1012 |
| hsa-miR-18a | -         | KIAA1324  | KIAA1324 |
| hsa-miR-18a | -         | KIAA1407  | KIAA1407 |
| hsa-miR-18a | KIT       | KIT       | -        |
| hsa-miR-18a | KLHL15    | KLHL15    | -        |
| hsa-miR-18a | KLHL20    | KLHL20    | -        |
| hsa-miR-18a | KPNA6     | KPNA6     | -        |
| hsa-miR-18a | -         | KRTAP4-3  | KRTAP4-3 |
| hsa-miR-18a | -         | LAMA3     | LAMA3    |
| hsa-miR-18a | LAT       | LAT       | -        |
| hsa-miR-18a | -         | LCK       | LCK      |
| hsa-miR-18a | -         | LGALS12   | LGALS12  |
| hsa-miR-18a | LIF       | LIF       | -        |
| hsa-miR-18a | LIN28A    | LIN28A    | -        |
| hsa-miR-18a | LIN54     | LIN54     | -        |
| hsa-miR-18a | LMO4      | LMO4      | -        |
| hsa-miR-18a | LPP       | LPP       | -        |
| hsa-miR-18a | LRRFIP1   | LRRFIP1   | -        |
| hsa-miR-18a | -         | MAGI3     | MAGI3    |
| hsa-miR-18a | MAP3K1    | MAP3K1    | -        |
| hsa-miR-18a | MAPK1IP1L | MAPK1IP1L | -        |
| hsa-miR-18a | MAPK4     | MAPK4     | -        |
| hsa-miR-18a | -         | MARCH2    | MARCH2   |
| hsa-miR-18a | MARCH5    | MARCH5    | -        |
| hsa-miR-18a | -         | MASP1     | MASP1    |
| hsa-miR-18a | -         | MASTL     | MASTL    |
| hsa-miR-18a | MBNL1     | MBNL1     | -        |

|             |         |           |           |
|-------------|---------|-----------|-----------|
| hsa-miR-18a | MBOAT2  | MBOAT2    | -         |
| hsa-miR-18a | MEF2D   | MEF2D     | -         |
| hsa-miR-18a | -       | MESP1     | MESP1     |
| hsa-miR-18a | -       | MMP3      | MMP3      |
| hsa-miR-18a | -       | MORC2     | MORC2     |
| hsa-miR-18a | -       | MUSTN1    | MUSTN1    |
| hsa-miR-18a | -       | MYADM     | MYADM     |
| hsa-miR-18a | MYO1C   | MYO1C     | -         |
| hsa-miR-18a | -       | MYPN      | MYPN      |
| hsa-miR-18a | NAA50   | NAA50     | -         |
| hsa-miR-18a | NACC1   | NACC1     | -         |
| hsa-miR-18a | -       | NBEA      | NBEA      |
| hsa-miR-18a | NCOA1   | NCOA1     | -         |
| hsa-miR-18a | NCOA2   | NCOA2     | -         |
| hsa-miR-18a | NDFIP1  | NDFIP1    | -         |
| hsa-miR-18a | NEDD4   | NEDD4     | -         |
| hsa-miR-18a | NEDD9   | NEDD9     | -         |
| hsa-miR-18a | NEO1    | NEO1      | -         |
| hsa-miR-18a | NIPAL3  | NIPAL3    | -         |
| hsa-miR-18a | -       | NIPSNAP3B | NIPSNAP3B |
| hsa-miR-18a | -       | NKIRAS1   | NKIRAS1   |
| hsa-miR-18a | NOTCH2  | NOTCH2    | -         |
| hsa-miR-18a | -       | NPL       | NPL       |
| hsa-miR-18a | -       | NR2C1     | NR2C1     |
| hsa-miR-18a | NR3C1   | NR3C1     | -         |
| hsa-miR-18a | NRG1    | NRG1      | -         |
| hsa-miR-18a | -       | NT5C3L    | NT5C3L    |
| hsa-miR-18a | -       | NTAN1     | NTAN1     |
| hsa-miR-18a | OCRL    | OCRL      | -         |
| hsa-miR-18a | ODZ3    | ODZ3      | -         |
| hsa-miR-18a | ODZ4    | ODZ4      | -         |
| hsa-miR-18a | OLFML2B | OLFML2B   | -         |
| hsa-miR-18a | ORAI3   | ORAI3     | -         |
| hsa-miR-18a | OSBP2   | OSBP2     | -         |
| hsa-miR-18a | OSTM1   | OSTM1     | -         |
| hsa-miR-18a | PARD6B  | PARD6B    | -         |
| hsa-miR-18a | -       | PCID2     | PCID2     |
| hsa-miR-18a | -       | PCK2      | PCK2      |
| hsa-miR-18a | -       | PCYT1A    | PCYT1A    |
| hsa-miR-18a | PDE1B   | PDE1B     | -         |
| hsa-miR-18a | PDZD2   | PDZD2     | -         |
| hsa-miR-18a | PHC3    | PHC3      | -         |
| hsa-miR-18a | PHF19   | PHF19     | -         |
| hsa-miR-18a | PHF2    | PHF2      | -         |
| hsa-miR-18a | PHF20L1 | PHF20L1   | -         |
| hsa-miR-18a | PIAS3   | PIAS3     | -         |
| hsa-miR-18a | -       | PIK3C2A   | PIK3C2A   |
| hsa-miR-18a | PKNOX1  | PKNOX1    | -         |
| hsa-miR-18a | -       | PLA2G1B   | PLA2G1B   |
| hsa-miR-18a | -       | PLA2G2F   | PLA2G2F   |
| hsa-miR-18a | PLEKHA6 | PLEKHA6   | -         |

|             |           |           |          |
|-------------|-----------|-----------|----------|
| hsa-miR-18a | -         | PLLP      | PLLP     |
| hsa-miR-18a | -         | PNLIPRP3  | PNLIPRP3 |
| hsa-miR-18a | -         | PODNL1    | PODNL1   |
| hsa-miR-18a | -         | PPAP2A    | PPAP2A   |
| hsa-miR-18a | -         | PRDM6     | PRDM6    |
| hsa-miR-18a | -         | PRPF4B    | PRPF4B   |
| hsa-miR-18a | PTGFRN    | PTGFRN    | -        |
| hsa-miR-18a | -         | PYHIN1    | PYHIN1   |
| hsa-miR-18a | -         | R3HDML    | R3HDML   |
| hsa-miR-18a | RAB11FIP2 | RAB11FIP2 | -        |
| hsa-miR-18a | RAB5C     | RAB5C     | -        |
| hsa-miR-18a | -         | RAB9A     | RAB9A    |
| hsa-miR-18a | RABGAP1   | RABGAP1   | -        |
| hsa-miR-18a | -         | RAD51AP1  | RAD51AP1 |
| hsa-miR-18a | -         | RAD51L1   | RAD51L1  |
| hsa-miR-18a | -         | RAG1AP1   | RAG1AP1  |
| hsa-miR-18a | -         | RASSF3    | RASSF3   |
| hsa-miR-18a | -         | RBBP8     | RBBP8    |
| hsa-miR-18a | -         | RBM3      | RBM3     |
| hsa-miR-18a | RCOR1     | RCOR1     | -        |
| hsa-miR-18a | -         | REXO2     | REXO2    |
| hsa-miR-18a | -         | RFC4      | RFC4     |
| hsa-miR-18a | RGS4      | RGS4      | -        |
| hsa-miR-18a | -         | RIC3      | RIC3     |
| hsa-miR-18a | -         | RIPK3     | RIPK3    |
| hsa-miR-18a | -         | RLF       | RLF      |
| hsa-miR-18a | -         | RNF157    | RNF157   |
| hsa-miR-18a | RNF4      | RNF4      | -        |
| hsa-miR-18a | RORA      | RORA      | -        |
| hsa-miR-18a | -         | RPS6KA5   | RPS6KA5  |
| hsa-miR-18a | -         | RRAS      | RRAS     |
| hsa-miR-18a | -         | RRP12     | RRP12    |
| hsa-miR-18a | -         | RSU1      | RSU1     |
| hsa-miR-18a | -         | RTN2      | RTN2     |
| hsa-miR-18a | RUNX1     | RUNX1     | -        |
| hsa-miR-18a | SAR1A     | SAR1A     | -        |
| hsa-miR-18a | SATB1     | SATB1     | -        |
| hsa-miR-18a | -         | SCLY      | SCLY     |
| hsa-miR-18a | -         | SEC23IP   | SEC23IP  |
| hsa-miR-18a | -         | SFTPB     | SFTPB    |
| hsa-miR-18a | SH3BP4    | SH3BP4    | -        |
| hsa-miR-18a | SH3KBP1   | SH3KBP1   | -        |
| hsa-miR-18a | SIK3      | SIK3      | -        |
| hsa-miR-18a | SIM2      | SIM2      | -        |
| hsa-miR-18a | -         | SIPA1L1   | SIPA1L1  |
| hsa-miR-18a | -         | SIRPB1    | SIRPB1   |
| hsa-miR-18a | SLC12A6   | SLC12A6   | -        |
| hsa-miR-18a | -         | SLC12A8   | SLC12A8  |
| hsa-miR-18a | -         | SLC22A16  | SLC22A16 |
| hsa-miR-18a | -         | SLC22A8   | SLC22A8  |
| hsa-miR-18a | -         | SLC22A9   | SLC22A9  |

|             |         |          |          |
|-------------|---------|----------|----------|
| hsa-miR-18a | -       | SLC25A28 | SLC25A28 |
| hsa-miR-18a | -       | SLC27A2  | SLC27A2  |
| hsa-miR-18a | -       | SLC35D2  | SLC35D2  |
| hsa-miR-18a | -       | SLC46A3  | SLC46A3  |
| hsa-miR-18a | SMAP2   | SMAP2    | -        |
| hsa-miR-18a | SMARCC2 | SMARCC2  | -        |
| hsa-miR-18a | SMG1    | SMG1     | -        |
| hsa-miR-18a | -       | SMPX     | SMPX     |
| hsa-miR-18a | SNRK    | SNRK     | -        |
| hsa-miR-18a | SORBS2  | SORBS2   | -        |
| hsa-miR-18a | -       | SREBF1   | SREBF1   |
| hsa-miR-18a | -       | SRP19    | SRP19    |
| hsa-miR-18a | STAM2   | STAM2    | -        |
| hsa-miR-18a | -       | STAT6    | STAT6    |
| hsa-miR-18a | -       | SYN2     | SYN2     |
| hsa-miR-18a | SYNCRIP | SYNCRIP  | -        |
| hsa-miR-18a | -       | TAOK2    | TAOK2    |
| hsa-miR-18a | -       | TCEA2    | TCEA2    |
| hsa-miR-18a | TEX2    | TEX2     | -        |
| hsa-miR-18a | THBD    | THBD     | -        |
| hsa-miR-18a | THBS1   | THBS1    | -        |
| hsa-miR-18a | TLL1    | TLL1     | -        |
| hsa-miR-18a | TLL2    | TLL2     | -        |
| hsa-miR-18a | TMEM2   | TMEM2    | -        |
| hsa-miR-18a | -       | TOR1B    | TOR1B    |
| hsa-miR-18a | -       | TRADD    | TRADD    |
| hsa-miR-18a | TRIB2   | TRIB2    | -        |
| hsa-miR-18a | TRIM2   | TRIM2    | -        |
| hsa-miR-18a | TRIOBP  | TRIOBP   | -        |
| hsa-miR-18a | -       | TRPC4    | TRPC4    |
| hsa-miR-18a | -       | TRUB2    | TRUB2    |
| hsa-miR-18a | -       | TTC24    | TTC24    |
| hsa-miR-18a | -       | TTC8     | TTC8     |
| hsa-miR-18a | TTPAL   | TTPAL    | -        |
| hsa-miR-18a | TWF1    | TWF1     | -        |
| hsa-miR-18a | -       | TXK      | TXK      |
| hsa-miR-18a | -       | UBAP2L   | UBAP2L   |
| hsa-miR-18a | -       | UBQLNL   | UBQLNL   |
| hsa-miR-18a | -       | UFM1     | UFM1     |
| hsa-miR-18a | UNG     | UNG      | -        |
| hsa-miR-18a | -       | UPP1     | UPP1     |
| hsa-miR-18a | UQCRB   | UQCRB    | -        |
| hsa-miR-18a | USP24   | USP24    | -        |
| hsa-miR-18a | -       | USP35    | USP35    |
| hsa-miR-18a | -       | VAX2     | VAX2     |
| hsa-miR-18a | VMA21   | VMA21    | -        |
| hsa-miR-18a | -       | VPS52    | VPS52    |
| hsa-miR-18a | -       | WBSCR22  | WBSCR22  |
| hsa-miR-18a | -       | WEE1     | WEE1     |
| hsa-miR-18a | -       | WIPF1    | WIPF1    |
| hsa-miR-18a | XYLT1   | XYLT1    | -        |

|             |          |          |         |
|-------------|----------|----------|---------|
| hsa-miR-18a | XYLT2    | XYLT2    | -       |
| hsa-miR-18a | -        | YIPF7    | YIPF7   |
| hsa-miR-18a | YWHAB    | YWHAB    | -       |
| hsa-miR-18a | -        | ZBTB3    | ZBTB3   |
| hsa-miR-18a | ZBTB4    | ZBTB4    | -       |
| hsa-miR-18a | ZBTB47   | ZBTB47   | -       |
| hsa-miR-18a | ZC3H12C  | ZC3H12C  | -       |
| hsa-miR-18a | ZCCHC24  | ZCCHC24  | -       |
| hsa-miR-18a | ZCCHC3   | ZCCHC3   | -       |
| hsa-miR-18a | ZFP62    | ZFP62    | -       |
| hsa-miR-18a | -        | ZNF154   | ZNF154  |
| hsa-miR-18a | -        | ZNF341   | ZNF341  |
| hsa-miR-18a | ZNF367   | ZNF367   | -       |
| hsa-miR-18a | -        | ZNF491   | ZNF491  |
| hsa-miR-18a | -        | ZNF536   | ZNF536  |
| hsa-miR-18a | -        | ZNF627   | ZNF627  |
| hsa-miR-18a | ZNF704   | ZNF704   | -       |
| hsa-miR-18b | -        | ABCC3    | ABCC3   |
| hsa-miR-18b | -        | ACAD11   | ACAD11  |
| hsa-miR-18b | -        | ACTL6A   | ACTL6A  |
| hsa-miR-18b | -        | ADAL     | ADAL    |
| hsa-miR-18b | -        | ADAMTS4  | ADAMTS4 |
| hsa-miR-18b | ADAMTS9  | ADAMTS9  | -       |
| hsa-miR-18b | ADAT2    | ADAT2    | -       |
| hsa-miR-18b | ADD3     | ADD3     | -       |
| hsa-miR-18b | AKR1D1   | AKR1D1   | -       |
| hsa-miR-18b | ALCAM    | ALCAM    | -       |
| hsa-miR-18b | -        | ALDH1L1  | ALDH1L1 |
| hsa-miR-18b | ANK3     | ANK3     | -       |
| hsa-miR-18b | -        | ANKMY1   | ANKMY1  |
| hsa-miR-18b | -        | ANKRD10  | ANKRD10 |
| hsa-miR-18b | ANKRD13C | ANKRD13C | -       |
| hsa-miR-18b | -        | ANKRD44  | ANKRD44 |
| hsa-miR-18b | ANKRD50  | ANKRD50  | -       |
| hsa-miR-18b | -        | ANUBL1   | ANUBL1  |
| hsa-miR-18b | -        | ANXA13   | ANXA13  |
| hsa-miR-18b | -        | ANXA7    | ANXA7   |
| hsa-miR-18b | -        | AP3S1    | AP3S1   |
| hsa-miR-18b | -        | AS3MT    | AS3MT   |
| hsa-miR-18b | ASXL2    | ASXL2    | -       |
| hsa-miR-18b | ATM      | ATM      | -       |
| hsa-miR-18b | -        | ATP12A   | ATP12A  |
| hsa-miR-18b | -        | ATP2C2   | ATP2C2  |
| hsa-miR-18b | ATP8A1   | ATP8A1   | -       |
| hsa-miR-18b | ATXN1    | ATXN1    | -       |
| hsa-miR-18b | -        | BBS9     | BBS9    |
| hsa-miR-18b | BBX      | BBX      | -       |
| hsa-miR-18b | -        | BCCIP    | BCCIP   |
| hsa-miR-18b | -        | BCKDK    | BCKDK   |
| hsa-miR-18b | -        | BCL2L10  | BCL2L10 |
| hsa-miR-18b | BEND3    | BEND3    | -       |

|             |          |          |          |
|-------------|----------|----------|----------|
| hsa-miR-18b | -        | BEX1     | BEX1     |
| hsa-miR-18b | BHLHE22  | BHLHE22  | -        |
| hsa-miR-18b | -        | BHMT2    | BHMT2    |
| hsa-miR-18b | BRWD1    | BRWD1    | -        |
| hsa-miR-18b | BRWD3    | BRWD3    | -        |
| hsa-miR-18b | -        | BTG4     | BTG4     |
| hsa-miR-18b | -        | BUB3     | BUB3     |
| hsa-miR-18b | -        | C10orf95 | C10orf95 |
| hsa-miR-18b | C13orf30 | C13orf30 | -        |
| hsa-miR-18b | -        | C18orf20 | C18orf20 |
| hsa-miR-18b | -        | C19orf10 | C19orf10 |
| hsa-miR-18b | -        | C1QC     | C1QC     |
| hsa-miR-18b | -        | C1orf105 | C1orf105 |
| hsa-miR-18b | C1orf9   | C1orf9   | -        |
| hsa-miR-18b | -        | C1orf93  | C1orf93  |
| hsa-miR-18b | -        | C20orf30 | C20orf30 |
| hsa-miR-18b | C5orf13  | C5orf13  | -        |
| hsa-miR-18b | C5orf30  | C5orf30  | -        |
| hsa-miR-18b | -        | C6orf154 | C6orf154 |
| hsa-miR-18b | C6orf225 | C6orf225 | -        |
| hsa-miR-18b | -        | C6orf48  | C6orf48  |
| hsa-miR-18b | -        | CAD      | CAD      |
| hsa-miR-18b | CADM2    | CADM2    | -        |
| hsa-miR-18b | -        | CALCB    | CALCB    |
| hsa-miR-18b | -        | CAMK2N1  | CAMK2N1  |
| hsa-miR-18b | CAMKK2   | CAMKK2   | -        |
| hsa-miR-18b | -        | CASP4    | CASP4    |
| hsa-miR-18b | -        | CBX2     | CBX2     |
| hsa-miR-18b | CCDC88A  | CCDC88A  | -        |
| hsa-miR-18b | CCND2    | CCND2    | -        |
| hsa-miR-18b | -        | CCPG1    | CCPG1    |
| hsa-miR-18b | -        | CCR3     | CCR3     |
| hsa-miR-18b | CDK19    | CDK19    | -        |
| hsa-miR-18b | -        | CEP72    | CEP72    |
| hsa-miR-18b | -        | CHCHD1   | CHCHD1   |
| hsa-miR-18b | CLCC1    | CLCC1    | -        |
| hsa-miR-18b | -        | CNTN4    | CNTN4    |
| hsa-miR-18b | CNTNAP1  | CNTNAP1  | -        |
| hsa-miR-18b | -        | COMMD4   | COMMD4   |
| hsa-miR-18b | CORO2A   | CORO2A   | -        |
| hsa-miR-18b | -        | CPXM1    | CPXM1    |
| hsa-miR-18b | CREBL2   | CREBL2   | -        |
| hsa-miR-18b | CRIM1    | CRIM1    | -        |
| hsa-miR-18b | CSDA     | CSDA     | -        |
| hsa-miR-18b | CSRNP3   | CSRNP3   | -        |
| hsa-miR-18b | CTDSPL   | CTDSPL   | -        |
| hsa-miR-18b | CTGF     | CTGF     | -        |
| hsa-miR-18b | -        | CTNNBL1  | CTNNBL1  |
| hsa-miR-18b | -        | CTSF     | CTSF     |
| hsa-miR-18b | -        | CXorf40B | CXorf40B |
| hsa-miR-18b | -        | CYP39A1  | CYP39A1  |

|             |         |         |         |
|-------------|---------|---------|---------|
| hsa-miR-18b | DAAM2   | DAAM2   | -       |
| hsa-miR-18b | -       | DAB2    | DAB2    |
| hsa-miR-18b | -       | DACT2   | DACT2   |
| hsa-miR-18b | -       | DAK     | DAK     |
| hsa-miR-18b | DDX18   | DDX18   | -       |
| hsa-miR-18b | DICER1  | DICER1  | -       |
| hsa-miR-18b | DIP2C   | DIP2C   | -       |
| hsa-miR-18b | DIRAS2  | DIRAS2  | -       |
| hsa-miR-18b | -       | DNAI1   | DNAI1   |
| hsa-miR-18b | -       | DNAI2   | DNAI2   |
| hsa-miR-18b | -       | DNAJC1  | DNAJC1  |
| hsa-miR-18b | -       | DNAJC8  | DNAJC8  |
| hsa-miR-18b | DOCK4   | DOCK4   | -       |
| hsa-miR-18b | -       | DOK2    | DOK2    |
| hsa-miR-18b | DPP10   | DPP10   | -       |
| hsa-miR-18b | -       | DPPA3   | DPPA3   |
| hsa-miR-18b | -       | DR1     | DR1     |
| hsa-miR-18b | -       | DRG1    | DRG1    |
| hsa-miR-18b | -       | DSG4    | DSG4    |
| hsa-miR-18b | -       | DTNB    | DTNB    |
| hsa-miR-18b | -       | ECHS1   | ECHS1   |
| hsa-miR-18b | -       | EGLN2   | EGLN2   |
| hsa-miR-18b | EHMT1   | EHMT1   | -       |
| hsa-miR-18b | -       | EIF4G3  | EIF4G3  |
| hsa-miR-18b | ENC1    | ENC1    | -       |
| hsa-miR-18b | ENDOD1  | ENDOD1  | -       |
| hsa-miR-18b | EPB41L1 | EPB41L1 | -       |
| hsa-miR-18b | -       | EPDR1   | EPDR1   |
| hsa-miR-18b | -       | EPHA5   | EPHA5   |
| hsa-miR-18b | ERI1    | ERI1    | -       |
| hsa-miR-18b | -       | ESCO2   | ESCO2   |
| hsa-miR-18b | ESR1    | ESR1    | -       |
| hsa-miR-18b | ETV6    | ETV6    | -       |
| hsa-miR-18b | EXPH5   | EXPH5   | -       |
| hsa-miR-18b | F3      | F3      | -       |
| hsa-miR-18b | -       | FAM120C | FAM120C |
| hsa-miR-18b | FAM136A | FAM136A | -       |
| hsa-miR-18b | FAM166B | FAM166B | -       |
| hsa-miR-18b | FAM192A | FAM192A | -       |
| hsa-miR-18b | -       | FAM26D  | FAM26D  |
| hsa-miR-18b | FAM3C   | FAM3C   | -       |
| hsa-miR-18b | -       | FANCG   | FANCG   |
| hsa-miR-18b | -       | FBP1    | FBP1    |
| hsa-miR-18b | -       | FBP2    | FBP2    |
| hsa-miR-18b | -       | FBXL12  | FBXL12  |
| hsa-miR-18b | -       | FBXL7   | FBXL7   |
| hsa-miR-18b | FBXO28  | FBXO28  | -       |
| hsa-miR-18b | -       | FBXO9   | FBXO9   |
| hsa-miR-18b | FCHSD2  | FCHSD2  | -       |
| hsa-miR-18b | -       | FGD4    | FGD4    |
| hsa-miR-18b | FGF1    | FGF1    | -       |

|             |         |         |        |
|-------------|---------|---------|--------|
| hsa-miR-18b | -       | FGFR2   | FGFR2  |
| hsa-miR-18b | FGFR3   | FGFR3   | -      |
| hsa-miR-18b | FNBP1   | FNBP1   | -      |
| hsa-miR-18b | FNDC3B  | FNDC3B  | -      |
| hsa-miR-18b | FOXH1   | FOXH1   | -      |
| hsa-miR-18b | FRYL    | FRYL    | -      |
| hsa-miR-18b | -       | GAB1    | GAB1   |
| hsa-miR-18b | -       | GAPDH   | GAPDH  |
| hsa-miR-18b | GCLC    | GCLC    | -      |
| hsa-miR-18b | -       | GCM2    | GCM2   |
| hsa-miR-18b | GIGYF1  | GIGYF1  | -      |
| hsa-miR-18b | GIGYF2  | GIGYF2  | -      |
| hsa-miR-18b | -       | GJB5    | GJB5   |
| hsa-miR-18b | -       | GLRB    | GLRB   |
| hsa-miR-18b | -       | GNA11   | GNA11  |
| hsa-miR-18b | -       | GNG2    | GNG2   |
| hsa-miR-18b | -       | GNL3L   | GNL3L  |
| hsa-miR-18b | -       | GPR173  | GPR173 |
| hsa-miR-18b | -       | GPR6    | GPR6   |
| hsa-miR-18b | -       | GPRIN2  | GPRIN2 |
| hsa-miR-18b | -       | GPX2    | GPX2   |
| hsa-miR-18b | -       | H2AFV   | H2AFV  |
| hsa-miR-18b | -       | HAGH    | HAGH   |
| hsa-miR-18b | HCFC2   | HCFC2   | -      |
| hsa-miR-18b | -       | HHLA3   | HHLA3  |
| hsa-miR-18b | HIF1A   | HIF1A   | -      |
| hsa-miR-18b | HLF     | HLF     | -      |
| hsa-miR-18b | HMG20B  | HMG20B  | -      |
| hsa-miR-18b | HMGCS1  | HMGCS1  | -      |
| hsa-miR-18b | HSF5    | HSF5    | -      |
| hsa-miR-18b | -       | HSPA8   | HSPA8  |
| hsa-miR-18b | HTR1D   | HTR1D   | -      |
| hsa-miR-18b | -       | IDH3G   | IDH3G  |
| hsa-miR-18b | -       | IFNA1   | IFNA1  |
| hsa-miR-18b | -       | IFNA2   | IFNA2  |
| hsa-miR-18b | IGF2BP2 | IGF2BP2 | -      |
| hsa-miR-18b | -       | IGF2R   | IGF2R  |
| hsa-miR-18b | -       | IL10RB  | IL10RB |
| hsa-miR-18b | -       | IL17B   | IL17B  |
| hsa-miR-18b | -       | IL9R    | IL9R   |
| hsa-miR-18b | INADL   | INADL   | -      |
| hsa-miR-18b | -       | INPP5F  | INPP5F |
| hsa-miR-18b | INPPL1  | INPPL1  | -      |
| hsa-miR-18b | -       | IPO7    | IPO7   |
| hsa-miR-18b | -       | IQSEC3  | IQSEC3 |
| hsa-miR-18b | IRF2    | IRF2    | -      |
| hsa-miR-18b | ISM1    | ISM1    | -      |
| hsa-miR-18b | -       | ITGAD   | ITGAD  |
| hsa-miR-18b | JAKMIP3 | JAKMIP3 | -      |
| hsa-miR-18b | JMY     | JMY     | -      |
| hsa-miR-18b | -       | KAAG1   | KAAG1  |



|             |           |           |          |
|-------------|-----------|-----------|----------|
| hsa-miR-18b | KCMF1     | KCMF1     | -        |
| hsa-miR-18b | KCNA1     | KCNA1     | -        |
| hsa-miR-18b | KCNJ2     | KCNJ2     | -        |
| hsa-miR-18b | -         | KCNN2     | KCNN2    |
| hsa-miR-18b | KDM2A     | KDM2A     | -        |
| hsa-miR-18b | KDM5B     | KDM5B     | -        |
| hsa-miR-18b | -         | KIAA0427  | KIAA0427 |
| hsa-miR-18b | KIAA0513  | KIAA0513  | -        |
| hsa-miR-18b | KIAA0907  | KIAA0907  | -        |
| hsa-miR-18b | -         | KIAA1012  | KIAA1012 |
| hsa-miR-18b | -         | KIAA1324  | KIAA1324 |
| hsa-miR-18b | -         | KIAA1407  | KIAA1407 |
| hsa-miR-18b | KIF3B     | KIF3B     | -        |
| hsa-miR-18b | KIT       | KIT       | -        |
| hsa-miR-18b | -         | KLHDC2    | KLHDC2   |
| hsa-miR-18b | KLHL15    | KLHL15    | -        |
| hsa-miR-18b | KLHL20    | KLHL20    | -        |
| hsa-miR-18b | KPNA6     | KPNA6     | -        |
| hsa-miR-18b | -         | KRTAP4-3  | KRTAP4-3 |
| hsa-miR-18b | -         | LACTB2    | LACTB2   |
| hsa-miR-18b | -         | LAMA3     | LAMA3    |
| hsa-miR-18b | LAT       | LAT       | -        |
| hsa-miR-18b | -         | LCK       | LCK      |
| hsa-miR-18b | -         | LGALS12   | LGALS12  |
| hsa-miR-18b | LIF       | LIF       | -        |
| hsa-miR-18b | LIN28A    | LIN28A    | -        |
| hsa-miR-18b | LIN54     | LIN54     | -        |
| hsa-miR-18b | LPP       | LPP       | -        |
| hsa-miR-18b | -         | MAEL      | MAEL     |
| hsa-miR-18b | -         | MAGI3     | MAGI3    |
| hsa-miR-18b | MAP3K1    | MAP3K1    | -        |
| hsa-miR-18b | MAPK1IP1L | MAPK1IP1L | -        |
| hsa-miR-18b | MAPK4     | MAPK4     | -        |
| hsa-miR-18b | MARCH5    | MARCH5    | -        |
| hsa-miR-18b | -         | MASP1     | MASP1    |
| hsa-miR-18b | -         | MASTL     | MASTL    |
| hsa-miR-18b | MBNL1     | MBNL1     | -        |
| hsa-miR-18b | MBOAT2    | MBOAT2    | -        |
| hsa-miR-18b | MEF2D     | MEF2D     | -        |
| hsa-miR-18b | -         | MESP1     | MESP1    |
| hsa-miR-18b | -         | MMP3      | MMP3     |
| hsa-miR-18b | -         | MORC2     | MORC2    |
| hsa-miR-18b | -         | MORN2     | MORN2    |
| hsa-miR-18b | -         | MUSTN1    | MUSTN1   |
| hsa-miR-18b | -         | MYADM     | MYADM    |
| hsa-miR-18b | MYO1C     | MYO1C     | -        |
| hsa-miR-18b | -         | MYPN      | MYPN     |
| hsa-miR-18b | NAA50     | NAA50     | -        |
| hsa-miR-18b | NACC1     | NACC1     | -        |
| hsa-miR-18b | -         | NBEA      | NBEA     |
| hsa-miR-18b | NCOA1     | NCOA1     | -        |

|             |           |           |           |
|-------------|-----------|-----------|-----------|
| hsa-miR-18b | NCOA2     | NCOA2     | -         |
| hsa-miR-18b | NDFIP1    | NDFIP1    | -         |
| hsa-miR-18b | NEDD4     | NEDD4     | -         |
| hsa-miR-18b | NEDD9     | NEDD9     | -         |
| hsa-miR-18b | NEO1      | NEO1      | -         |
| hsa-miR-18b | NIPAL3    | NIPAL3    | -         |
| hsa-miR-18b | -         | NIPSNAP3B | NIPSNAP3B |
| hsa-miR-18b | NOTCH2    | NOTCH2    | -         |
| hsa-miR-18b | -         | NPL       | NPL       |
| hsa-miR-18b | -         | NR2C1     | NR2C1     |
| hsa-miR-18b | NR3C1     | NR3C1     | -         |
| hsa-miR-18b | NRG1      | NRG1      | -         |
| hsa-miR-18b | -         | NT5C3L    | NT5C3L    |
| hsa-miR-18b | -         | NTAN1     | NTAN1     |
| hsa-miR-18b | NXT2      | NXT2      | -         |
| hsa-miR-18b | OCRL      | OCRL      | -         |
| hsa-miR-18b | ODZ3      | ODZ3      | -         |
| hsa-miR-18b | ODZ4      | ODZ4      | -         |
| hsa-miR-18b | OLFML2B   | OLFML2B   | -         |
| hsa-miR-18b | ORAI3     | ORAI3     | -         |
| hsa-miR-18b | OSBP2     | OSBP2     | -         |
| hsa-miR-18b | OSTM1     | OSTM1     | -         |
| hsa-miR-18b | PARD6B    | PARD6B    | -         |
| hsa-miR-18b | -         | PCDHA3    | PCDHA3    |
| hsa-miR-18b | -         | PCID2     | PCID2     |
| hsa-miR-18b | -         | PCK2      | PCK2      |
| hsa-miR-18b | -         | PCYT1A    | PCYT1A    |
| hsa-miR-18b | PDE1B     | PDE1B     | -         |
| hsa-miR-18b | PDE4D     | PDE4D     | -         |
| hsa-miR-18b | PDZD2     | PDZD2     | -         |
| hsa-miR-18b | PHC3      | PHC3      | -         |
| hsa-miR-18b | PHF19     | PHF19     | -         |
| hsa-miR-18b | PHF2      | PHF2      | -         |
| hsa-miR-18b | PHF20L1   | PHF20L1   | -         |
| hsa-miR-18b | PIAS3     | PIAS3     | -         |
| hsa-miR-18b | PKNOX1    | PKNOX1    | -         |
| hsa-miR-18b | -         | PLA2G1B   | PLA2G1B   |
| hsa-miR-18b | -         | PLA2G2F   | PLA2G2F   |
| hsa-miR-18b | PLEKHA6   | PLEKHA6   | -         |
| hsa-miR-18b | -         | PLLP      | PLLP      |
| hsa-miR-18b | -         | PNLIPRP3  | PNLIPRP3  |
| hsa-miR-18b | -         | PODNL1    | PODNL1    |
| hsa-miR-18b | -         | POLE3     | POLE3     |
| hsa-miR-18b | -         | POU6F1    | POU6F1    |
| hsa-miR-18b | -         | PPAP2A    | PPAP2A    |
| hsa-miR-18b | -         | PRDM6     | PRDM6     |
| hsa-miR-18b | PTGFRN    | PTGFRN    | -         |
| hsa-miR-18b | -         | PYHIN1    | PYHIN1    |
| hsa-miR-18b | -         | R3HDML    | R3HDML    |
| hsa-miR-18b | RAB11FIP2 | RAB11FIP2 | -         |
| hsa-miR-18b | RAB5C     | RAB5C     | -         |

|             |         |          |          |
|-------------|---------|----------|----------|
| hsa-miR-18b | -       | RAB9A    | RAB9A    |
| hsa-miR-18b | RABGAP1 | RABGAP1  | -        |
| hsa-miR-18b | -       | RAD51AP1 | RAD51AP1 |
| hsa-miR-18b | -       | RAD51L1  | RAD51L1  |
| hsa-miR-18b | -       | RAG1AP1  | RAG1AP1  |
| hsa-miR-18b | -       | RASSF3   | RASSF3   |
| hsa-miR-18b | -       | RBBP8    | RBBP8    |
| hsa-miR-18b | -       | RBM3     | RBM3     |
| hsa-miR-18b | RCOR1   | RCOR1    | -        |
| hsa-miR-18b | -       | REXO2    | REXO2    |
| hsa-miR-18b | -       | RFC4     | RFC4     |
| hsa-miR-18b | RGS4    | RGS4     | -        |
| hsa-miR-18b | -       | RIC3     | RIC3     |
| hsa-miR-18b | -       | RIPK3    | RIPK3    |
| hsa-miR-18b | -       | RLF      | RLF      |
| hsa-miR-18b | -       | RNF157   | RNF157   |
| hsa-miR-18b | RNF4    | RNF4     | -        |
| hsa-miR-18b | RORA    | RORA     | -        |
| hsa-miR-18b | -       | RRAS     | RRAS     |
| hsa-miR-18b | -       | RRP12    | RRP12    |
| hsa-miR-18b | -       | RSU1     | RSU1     |
| hsa-miR-18b | -       | RTN2     | RTN2     |
| hsa-miR-18b | RUNX1   | RUNX1    | -        |
| hsa-miR-18b | -       | S100Z    | S100Z    |
| hsa-miR-18b | SAR1A   | SAR1A    | -        |
| hsa-miR-18b | SATB1   | SATB1    | -        |
| hsa-miR-18b | -       | SCLY     | SCLY     |
| hsa-miR-18b | SEC14L3 | SEC14L3  | -        |
| hsa-miR-18b | -       | SEC23IP  | SEC23IP  |
| hsa-miR-18b | -       | SERTAD3  | SERTAD3  |
| hsa-miR-18b | -       | SFTPB    | SFTPB    |
| hsa-miR-18b | SH3KBP1 | SH3KBP1  | -        |
| hsa-miR-18b | SIK3    | SIK3     | -        |
| hsa-miR-18b | -       | SIPA1L1  | SIPA1L1  |
| hsa-miR-18b | -       | SIRPB1   | SIRPB1   |
| hsa-miR-18b | SLC12A6 | SLC12A6  | -        |
| hsa-miR-18b | -       | SLC12A8  | SLC12A8  |
| hsa-miR-18b | -       | SLC22A16 | SLC22A16 |
| hsa-miR-18b | -       | SLC22A8  | SLC22A8  |
| hsa-miR-18b | -       | SLC22A9  | SLC22A9  |
| hsa-miR-18b | -       | SLC25A28 | SLC25A28 |
| hsa-miR-18b | -       | SLC27A2  | SLC27A2  |
| hsa-miR-18b | -       | SLC35D2  | SLC35D2  |
| hsa-miR-18b | -       | SLC46A3  | SLC46A3  |
| hsa-miR-18b | -       | SLFNL1   | SLFNL1   |
| hsa-miR-18b | SMAP2   | SMAP2    | -        |
| hsa-miR-18b | SMARCC2 | SMARCC2  | -        |
| hsa-miR-18b | SMG1    | SMG1     | -        |
| hsa-miR-18b | SNRK    | SNRK     | -        |
| hsa-miR-18b | SORBS2  | SORBS2   | -        |
| hsa-miR-18b | -       | SPG20    | SPG20    |

|             |         |          |          |
|-------------|---------|----------|----------|
| hsa-miR-18b | -       | SRD5A1   | SRD5A1   |
| hsa-miR-18b | -       | SREBF1   | SREBF1   |
| hsa-miR-18b | -       | SRP19    | SRP19    |
| hsa-miR-18b | STAM2   | STAM2    | -        |
| hsa-miR-18b | -       | STAT6    | STAT6    |
| hsa-miR-18b | -       | SYN2     | SYN2     |
| hsa-miR-18b | SYNCRIP | SYNCRIP  | -        |
| hsa-miR-18b | -       | TAGLN3   | TAGLN3   |
| hsa-miR-18b | -       | TAOK2    | TAOK2    |
| hsa-miR-18b | -       | TCEA2    | TCEA2    |
| hsa-miR-18b | -       | TCP1     | TCP1     |
| hsa-miR-18b | TEX2    | TEX2     | -        |
| hsa-miR-18b | THBS1   | THBS1    | -        |
| hsa-miR-18b | TLL1    | TLL1     | -        |
| hsa-miR-18b | TLL2    | TLL2     | -        |
| hsa-miR-18b | -       | TMEM106A | TMEM106A |
| hsa-miR-18b | TMEM2   | TMEM2    | -        |
| hsa-miR-18b | TNFAIP3 | TNFAIP3  | -        |
| hsa-miR-18b | -       | TRADD    | TRADD    |
| hsa-miR-18b | TRIB2   | TRIB2    | -        |
| hsa-miR-18b | TRIM2   | TRIM2    | -        |
| hsa-miR-18b | TRIOBP  | TRIOBP   | -        |
| hsa-miR-18b | -       | TRPC4    | TRPC4    |
| hsa-miR-18b | -       | TRUB2    | TRUB2    |
| hsa-miR-18b | -       | TTC24    | TTC24    |
| hsa-miR-18b | -       | TTC8     | TTC8     |
| hsa-miR-18b | -       | TLL11    | TLL11    |
| hsa-miR-18b | TTPAL   | TTPAL    | -        |
| hsa-miR-18b | TWF1    | TWF1     | -        |
| hsa-miR-18b | -       | TXK      | TXK      |
| hsa-miR-18b | -       | UBAP2L   | UBAP2L   |
| hsa-miR-18b | -       | UBQLNL   | UBQLNL   |
| hsa-miR-18b | -       | UFM1     | UFM1     |
| hsa-miR-18b | UNG     | UNG      | -        |
| hsa-miR-18b | UQCRB   | UQCRB    | -        |
| hsa-miR-18b | -       | USH2A    | USH2A    |
| hsa-miR-18b | USP24   | USP24    | -        |
| hsa-miR-18b | -       | USP35    | USP35    |
| hsa-miR-18b | -       | VAX2     | VAX2     |
| hsa-miR-18b | VMA21   | VMA21    | -        |
| hsa-miR-18b | -       | VPS52    | VPS52    |
| hsa-miR-18b | -       | WBSCR22  | WBSCR22  |
| hsa-miR-18b | -       | WEE1     | WEE1     |
| hsa-miR-18b | XYLT1   | XYLT1    | -        |
| hsa-miR-18b | XYLT2   | XYLT2    | -        |
| hsa-miR-18b | -       | YIPF7    | YIPF7    |
| hsa-miR-18b | YWHAB   | YWHAB    | -        |
| hsa-miR-18b | -       | ZBTB3    | ZBTB3    |
| hsa-miR-18b | ZBTB4   | ZBTB4    | -        |
| hsa-miR-18b | ZBTB47  | ZBTB47   | -        |
| hsa-miR-18b | ZC3H12C | ZC3H12C  | -        |

|                 |         |           |           |
|-----------------|---------|-----------|-----------|
| hsa-miR-18b     | ZCCHC24 | ZCCHC24   | -         |
| hsa-miR-18b     | ZCCHC3  | ZCCHC3    | -         |
| hsa-miR-18b     | ZFP62   | ZFP62     | -         |
| hsa-miR-18b     | -       | ZNF341    | ZNF341    |
| hsa-miR-18b     | ZNF367  | ZNF367    | -         |
| hsa-miR-18b     | -       | ZNF491    | ZNF491    |
| hsa-miR-18b     | -       | ZNF536    | ZNF536    |
| hsa-miR-18b     | -       | ZNF627    | ZNF627    |
| hsa-miR-18b     | ZNF704  | ZNF704    | -         |
| hsa-miR-199a-5p | -       | A2ML1     | A2ML1     |
| hsa-miR-199a-5p | -       | AADAT     | AADAT     |
| hsa-miR-199a-5p | -       | ABCC3     | ABCC3     |
| hsa-miR-199a-5p | -       | ACP2      | ACP2      |
| hsa-miR-199a-5p | -       | ACPT      | ACPT      |
| hsa-miR-199a-5p | -       | AGBL5     | AGBL5     |
| hsa-miR-199a-5p | -       | AKAP1     | AKAP1     |
| hsa-miR-199a-5p | -       | ANXA4     | ANXA4     |
| hsa-miR-199a-5p | -       | APBB1     | APBB1     |
| hsa-miR-199a-5p | -       | APOL2     | APOL2     |
| hsa-miR-199a-5p | -       | ARIH2     | ARIH2     |
| hsa-miR-199a-5p | -       | ASPHD1    | ASPHD1    |
| hsa-miR-199a-5p | -       | ATP13A2   | ATP13A2   |
| hsa-miR-199a-5p | -       | B3GALT1   | B3GALT1   |
| hsa-miR-199a-5p | -       | B3GNT1    | B3GNT1    |
| hsa-miR-199a-5p | -       | BAG1      | BAG1      |
| hsa-miR-199a-5p | -       | BCAM      | BCAM      |
| hsa-miR-199a-5p | -       | BMP3      | BMP3      |
| hsa-miR-199a-5p | -       | BTBD7     | BTBD7     |
| hsa-miR-199a-5p | -       | C11orf9   | C11orf9   |
| hsa-miR-199a-5p | -       | C14orf159 | C14orf159 |
| hsa-miR-199a-5p | -       | C14orf93  | C14orf93  |
| hsa-miR-199a-5p | -       | C15orf24  | C15orf24  |

|                 |   |          |          |
|-----------------|---|----------|----------|
| hsa-miR-199a-5p | - | C17orf63 | C17orf63 |
| hsa-miR-199a-5p | - | C1GALT1  | C1GALT1  |
| hsa-miR-199a-5p | - | C1QL3    | C1QL3    |
| hsa-miR-199a-5p | - | C1orf105 | C1orf105 |
| hsa-miR-199a-5p | - | C20orf3  | C20orf3  |
| hsa-miR-199a-5p | - | C4orf35  | C4orf35  |
| hsa-miR-199a-5p | - | C9orf5   | C9orf5   |
| hsa-miR-199a-5p | - | C9orf66  | C9orf66  |
| hsa-miR-199a-5p | - | CACNA1S  | CACNA1S  |
| hsa-miR-199a-5p | - | CADPS    | CADPS    |
| hsa-miR-199a-5p | - | CCDC104  | CCDC104  |
| hsa-miR-199a-5p | - | CCNL1    | CCNL1    |
| hsa-miR-199a-5p | - | CD40     | CD40     |
| hsa-miR-199a-5p | - | CD48     | CD48     |
| hsa-miR-199a-5p | - | CD5L     | CD5L     |
| hsa-miR-199a-5p | - | CDCA7L   | CDCA7L   |
| hsa-miR-199a-5p | - | CDH2     | CDH2     |
| hsa-miR-199a-5p | - | CDK7     | CDK7     |
| hsa-miR-199a-5p | - | CDK9     | CDK9     |
| hsa-miR-199a-5p | - | CDKN1C   | CDKN1C   |
| hsa-miR-199a-5p | - | CEACAM3  | CEACAM3  |
| hsa-miR-199a-5p | - | CGRRF1   | CGRRF1   |
| hsa-miR-199a-5p | - | CHCHD7   | CHCHD7   |
| hsa-miR-199a-5p | - | CHRM5    | CHRM5    |
| hsa-miR-199a-5p | - | CLDN22   | CLDN22   |
| hsa-miR-199a-5p | - | CLK2     | CLK2     |
| hsa-miR-199a-5p | - | CNTNAP3B | CNTNAP3B |
| hsa-miR-199a-5p | - | COPS6    | COPS6    |

|                 |   |          |          |
|-----------------|---|----------|----------|
| hsa-miR-199a-5p | - | CRCT1    | CRCT1    |
| hsa-miR-199a-5p | - | CREM     | CREM     |
| hsa-miR-199a-5p | - | CTSL1    | CTSL1    |
| hsa-miR-199a-5p | - | CXCL16   | CXCL16   |
| hsa-miR-199a-5p | - | CXCL6    | CXCL6    |
| hsa-miR-199a-5p | - | CYB5R2   | CYB5R2   |
| hsa-miR-199a-5p | - | DACH2    | DACH2    |
| hsa-miR-199a-5p | - | DDR1     | DDR1     |
| hsa-miR-199a-5p | - | DERL2    | DERL2    |
| hsa-miR-199a-5p | - | DMRTB1   | DMRTB1   |
| hsa-miR-199a-5p | - | DNAH7    | DNAH7    |
| hsa-miR-199a-5p | - | DPP8     | DPP8     |
| hsa-miR-199a-5p | - | DTNBP1   | DTNBP1   |
| hsa-miR-199a-5p | - | DULLARD  | DULLARD  |
| hsa-miR-199a-5p | - | DUSP14   | DUSP14   |
| hsa-miR-199a-5p | - | DYNC2LI1 | DYNC2LI1 |
| hsa-miR-199a-5p | - | DYNLRB2  | DYNLRB2  |
| hsa-miR-199a-5p | - | EBP      | EBP      |
| hsa-miR-199a-5p | - | ECE1     | ECE1     |
| hsa-miR-199a-5p | - | EEA1     | EEA1     |
| hsa-miR-199a-5p | - | EGF      | EGF      |
| hsa-miR-199a-5p | - | EHD4     | EHD4     |
| hsa-miR-199a-5p | - | EIF5B    | EIF5B    |
| hsa-miR-199a-5p | - | ELAVL4   | ELAVL4   |
| hsa-miR-199a-5p | - | ENO3     | ENO3     |
| hsa-miR-199a-5p | - | EPAS1    | EPAS1    |
| hsa-miR-199a-5p | - | EPB41L1  | EPB41L1  |
| hsa-miR-199a-5p | - | EPB41L3  | EPB41L3  |

|                 |   |          |          |
|-----------------|---|----------|----------|
| hsa-miR-199a-5p | - | EPHA10   | EPHA10   |
| hsa-miR-199a-5p | - | EPHB6    | EPHB6    |
| hsa-miR-199a-5p | - | ESD      | ESD      |
| hsa-miR-199a-5p | - | FAM107B  | FAM107B  |
| hsa-miR-199a-5p | - | FAM108C1 | FAM108C1 |
| hsa-miR-199a-5p | - | FAM43B   | FAM43B   |
| hsa-miR-199a-5p | - | FAM5B    | FAM5B    |
| hsa-miR-199a-5p | - | FCAMR    | FCAMR    |
| hsa-miR-199a-5p | - | FCGRT    | FCGRT    |
| hsa-miR-199a-5p | - | FGFBP2   | FGFBP2   |
| hsa-miR-199a-5p | - | FHAD1    | FHAD1    |
| hsa-miR-199a-5p | - | FKBP15   | FKBP15   |
| hsa-miR-199a-5p | - | FSD1     | FSD1     |
| hsa-miR-199a-5p | - | FUT10    | FUT10    |
| hsa-miR-199a-5p | - | FXVD3    | FXVD3    |
| hsa-miR-199a-5p | - | GALE     | GALE     |
| hsa-miR-199a-5p | - | GJB3     | GJB3     |
| hsa-miR-199a-5p | - | GNG5     | GNG5     |
| hsa-miR-199a-5p | - | GON4L    | GON4L    |
| hsa-miR-199a-5p | - | GPBP1L1  | GPBP1L1  |
| hsa-miR-199a-5p | - | GPR39    | GPR39    |
| hsa-miR-199a-5p | - | GRIN3B   | GRIN3B   |
| hsa-miR-199a-5p | - | GRTP1    | GRTP1    |
| hsa-miR-199a-5p | - | GSK3B    | GSK3B    |
| hsa-miR-199a-5p | - | GSS      | GSS      |
| hsa-miR-199a-5p | - | GZMB     | GZMB     |
| hsa-miR-199a-5p | - | HDDC2    | HDDC2    |
| hsa-miR-199a-5p | - | HDHD1A   | HDHD1A   |



|                 |   |          |          |
|-----------------|---|----------|----------|
| hsa-miR-199a-5p | - | HEPH     | HEPH     |
| hsa-miR-199a-5p | - | HERC6    | HERC6    |
| hsa-miR-199a-5p | - | HIAT1    | HIAT1    |
| hsa-miR-199a-5p | - | HIF1A    | HIF1A    |
| hsa-miR-199a-5p | - | HIRA     | HIRA     |
| hsa-miR-199a-5p | - | HMGA2    | HMGA2    |
| hsa-miR-199a-5p | - | IGFBP1   | IGFBP1   |
| hsa-miR-199a-5p | - | IKBKB    | IKBKB    |
| hsa-miR-199a-5p | - | IL13     | IL13     |
| hsa-miR-199a-5p | - | IL20RB   | IL20RB   |
| hsa-miR-199a-5p | - | IMPG2    | IMPG2    |
| hsa-miR-199a-5p | - | KCNC3    | KCNC3    |
| hsa-miR-199a-5p | - | KCNH2    | KCNH2    |
| hsa-miR-199a-5p | - | KCTD21   | KCTD21   |
| hsa-miR-199a-5p | - | KIAA0355 | KIAA0355 |
| hsa-miR-199a-5p | - | KIAA0748 | KIAA0748 |
| hsa-miR-199a-5p | - | KIF9     | KIF9     |
| hsa-miR-199a-5p | - | KLK7     | KLK7     |
| hsa-miR-199a-5p | - | KRT37    | KRT37    |
| hsa-miR-199a-5p | - | LHX4     | LHX4     |
| hsa-miR-199a-5p | - | LILRA5   | LILRA5   |
| hsa-miR-199a-5p | - | LMAN2    | LMAN2    |
| hsa-miR-199a-5p | - | LRRC17   | LRRC17   |
| hsa-miR-199a-5p | - | LRRC61   | LRRC61   |
| hsa-miR-199a-5p | - | LUZP1    | LUZP1    |
| hsa-miR-199a-5p | - | LXN      | LXN      |
| hsa-miR-199a-5p | - | LY6K     | LY6K     |
| hsa-miR-199a-5p | - | LYRM2    | LYRM2    |

|                 |   |         |         |
|-----------------|---|---------|---------|
| hsa-miR-199a-5p | - | M6PR    | M6PR    |
| hsa-miR-199a-5p | - | MAP3K11 | MAP3K11 |
| hsa-miR-199a-5p | - | MAP3K12 | MAP3K12 |
| hsa-miR-199a-5p | - | MAP7D2  | MAP7D2  |
| hsa-miR-199a-5p | - | MCTP1   | MCTP1   |
| hsa-miR-199a-5p | - | MED4    | MED4    |
| hsa-miR-199a-5p | - | MGAT4B  | MGAT4B  |
| hsa-miR-199a-5p | - | MPP4    | MPP4    |
| hsa-miR-199a-5p | - | MRPS35  | MRPS35  |
| hsa-miR-199a-5p | - | MYRIP   | MYRIP   |
| hsa-miR-199a-5p | - | NAB2    | NAB2    |
| hsa-miR-199a-5p | - | NAT1    | NAT1    |
| hsa-miR-199a-5p | - | NCR1    | NCR1    |
| hsa-miR-199a-5p | - | NDFIP1  | NDFIP1  |
| hsa-miR-199a-5p | - | NFE2L3  | NFE2L3  |
| hsa-miR-199a-5p | - | NLRC3   | NLRC3   |
| hsa-miR-199a-5p | - | NLRP7   | NLRP7   |
| hsa-miR-199a-5p | - | NPEPPS  | NPEPPS  |
| hsa-miR-199a-5p | - | NPY2R   | NPY2R   |
| hsa-miR-199a-5p | - | NT5C3   | NT5C3   |
| hsa-miR-199a-5p | - | NTNG1   | NTNG1   |
| hsa-miR-199a-5p | - | NUDT5   | NUDT5   |
| hsa-miR-199a-5p | - | NXT2    | NXT2    |
| hsa-miR-199a-5p | - | OAS1    | OAS1    |
| hsa-miR-199a-5p | - | ODZ2    | ODZ2    |
| hsa-miR-199a-5p | - | ORC5L   | ORC5L   |
| hsa-miR-199a-5p | - | OTX1    | OTX1    |
| hsa-miR-199a-5p | - | PCDHB18 | PCDHB18 |

|                 |   |          |          |
|-----------------|---|----------|----------|
| hsa-miR-199a-5p | - | PCK1     | PCK1     |
| hsa-miR-199a-5p | - | PDE4DIP  | PDE4DIP  |
| hsa-miR-199a-5p | - | PDSS1    | PDSS1    |
| hsa-miR-199a-5p | - | PIGB     | PIGB     |
| hsa-miR-199a-5p | - | PIGG     | PIGG     |
| hsa-miR-199a-5p | - | PIGS     | PIGS     |
| hsa-miR-199a-5p | - | PIK3CD   | PIK3CD   |
| hsa-miR-199a-5p | - | PLEK2    | PLEK2    |
| hsa-miR-199a-5p | - | PLEKHA4  | PLEKHA4  |
| hsa-miR-199a-5p | - | PLEKHA5  | PLEKHA5  |
| hsa-miR-199a-5p | - | PLEKHG4  | PLEKHG4  |
| hsa-miR-199a-5p | - | PLXNB1   | PLXNB1   |
| hsa-miR-199a-5p | - | PNLIPRP1 | PNLIPRP1 |
| hsa-miR-199a-5p | - | POMT1    | POMT1    |
| hsa-miR-199a-5p | - | POP4     | POP4     |
| hsa-miR-199a-5p | - | POU3F2   | POU3F2   |
| hsa-miR-199a-5p | - | PPP2R1A  | PPP2R1A  |
| hsa-miR-199a-5p | - | PRG4     | PRG4     |
| hsa-miR-199a-5p | - | PRKAG2   | PRKAG2   |
| hsa-miR-199a-5p | - | PRPF3    | PRPF3    |
| hsa-miR-199a-5p | - | PTPN9    | PTPN9    |
| hsa-miR-199a-5p | - | PVRL2    | PVRL2    |
| hsa-miR-199a-5p | - | RAB21    | RAB21    |
| hsa-miR-199a-5p | - | RANBP2   | RANBP2   |
| hsa-miR-199a-5p | - | RCCD1    | RCCD1    |
| hsa-miR-199a-5p | - | RCSD1    | RCSD1    |
| hsa-miR-199a-5p | - | RGS10    | RGS10    |
| hsa-miR-199a-5p | - | RHBDF2   | RHBDF2   |

|                 |   |         |         |
|-----------------|---|---------|---------|
| hsa-miR-199a-5p | - | RHEB    | RHEB    |
| hsa-miR-199a-5p | - | RHEBL1  | RHEBL1  |
| hsa-miR-199a-5p | - | RHOG    | RHOG    |
| hsa-miR-199a-5p | - | RIN2    | RIN2    |
| hsa-miR-199a-5p | - | RND1    | RND1    |
| hsa-miR-199a-5p | - | RNF113B | RNF113B |
| hsa-miR-199a-5p | - | ROGDI   | ROGDI   |
| hsa-miR-199a-5p | - | RPL13   | RPL13   |
| hsa-miR-199a-5p | - | RPS20   | RPS20   |
| hsa-miR-199a-5p | - | RTP4    | RTP4    |
| hsa-miR-199a-5p | - | SAT1    | SAT1    |
| hsa-miR-199a-5p | - | SCIN    | SCIN    |
| hsa-miR-199a-5p | - | SEC61A2 | SEC61A2 |
| hsa-miR-199a-5p | - | SELP    | SELP    |
| hsa-miR-199a-5p | - | SEMA4D  | SEMA4D  |
| hsa-miR-199a-5p | - | SESN1   | SESN1   |
| hsa-miR-199a-5p | - | SLAMF1  | SLAMF1  |
| hsa-miR-199a-5p | - | SLC10A4 | SLC10A4 |
| hsa-miR-199a-5p | - | SLC1A5  | SLC1A5  |
| hsa-miR-199a-5p | - | SLC24A2 | SLC24A2 |
| hsa-miR-199a-5p | - | SLC2A4  | SLC2A4  |
| hsa-miR-199a-5p | - | SLC35A2 | SLC35A2 |
| hsa-miR-199a-5p | - | SLC3A1  | SLC3A1  |
| hsa-miR-199a-5p | - | SLC46A2 | SLC46A2 |
| hsa-miR-199a-5p | - | SMARCA2 | SMARCA2 |
| hsa-miR-199a-5p | - | SOS2    | SOS2    |
| hsa-miR-199a-5p | - | SPA17   | SPA17   |
| hsa-miR-199a-5p | - | SPTB    | SPTB    |

|                 |   |          |          |
|-----------------|---|----------|----------|
| hsa-miR-199a-5p | - | SRRM1    | SRRM1    |
| hsa-miR-199a-5p | - | STOX2    | STOX2    |
| hsa-miR-199a-5p | - | SUCLG1   | SUCLG1   |
| hsa-miR-199a-5p | - | SUGT1    | SUGT1    |
| hsa-miR-199a-5p | - | SULF1    | SULF1    |
| hsa-miR-199a-5p | - | TANC2    | TANC2    |
| hsa-miR-199a-5p | - | TBC1D8   | TBC1D8   |
| hsa-miR-199a-5p | - | TCP10L   | TCP10L   |
| hsa-miR-199a-5p | - | TCTA     | TCTA     |
| hsa-miR-199a-5p | - | TELO2    | TELO2    |
| hsa-miR-199a-5p | - | TIMM10   | TIMM10   |
| hsa-miR-199a-5p | - | TLCD1    | TLCD1    |
| hsa-miR-199a-5p | - | TMEM132B | TMEM132B |
| hsa-miR-199a-5p | - | TMEM44   | TMEM44   |
| hsa-miR-199a-5p | - | TMEM63B  | TMEM63B  |
| hsa-miR-199a-5p | - | TMEM66   | TMEM66   |
| hsa-miR-199a-5p | - | TMEM97   | TMEM97   |
| hsa-miR-199a-5p | - | TMPRSS5  | TMPRSS5  |
| hsa-miR-199a-5p | - | TNK1     | TNK1     |
| hsa-miR-199a-5p | - | TNR      | TNR      |
| hsa-miR-199a-5p | - | TRIB3    | TRIB3    |
| hsa-miR-199a-5p | - | TRIM36   | TRIM36   |
| hsa-miR-199a-5p | - | TRPM4    | TRPM4    |
| hsa-miR-199a-5p | - | TRPV1    | TRPV1    |
| hsa-miR-199a-5p | - | TSPAN5   | TSPAN5   |
| hsa-miR-199a-5p | - | TSPYL6   | TSPYL6   |
| hsa-miR-199a-5p | - | TST      | TST      |
| hsa-miR-199a-5p | - | TTL2     | TTL2     |

|                 |   |         |         |
|-----------------|---|---------|---------|
| hsa-miR-199a-5p | - | TTLL9   | TTLL9   |
| hsa-miR-199a-5p | - | TXNDC11 | TXNDC11 |
| hsa-miR-199a-5p | - | TXNL1   | TXNL1   |
| hsa-miR-199a-5p | - | TXNRD1  | TXNRD1  |
| hsa-miR-199a-5p | - | UBAP1   | UBAP1   |
| hsa-miR-199a-5p | - | UBL5    | UBL5    |
| hsa-miR-199a-5p | - | USP19   | USP19   |
| hsa-miR-199a-5p | - | USP27X  | USP27X  |
| hsa-miR-199a-5p | - | USP29   | USP29   |
| hsa-miR-199a-5p | - | USPL1   | USPL1   |
| hsa-miR-199a-5p | - | VSIG4   | VSIG4   |
| hsa-miR-199a-5p | - | WAPAL   | WAPAL   |
| hsa-miR-199a-5p | - | WDR78   | WDR78   |
| hsa-miR-199a-5p | - | WNK4    | WNK4    |
| hsa-miR-199a-5p | - | WT1     | WT1     |
| hsa-miR-199a-5p | - | YAF2    | YAF2    |
| hsa-miR-199a-5p | - | ZCCHC11 | ZCCHC11 |
| hsa-miR-199a-5p | - | ZFAND2A | ZFAND2A |
| hsa-miR-199a-5p | - | ZFP2    | ZFP2    |
| hsa-miR-199a-5p | - | ZNF177  | ZNF177  |
| hsa-miR-199a-5p | - | ZNF335  | ZNF335  |
| hsa-miR-199a-5p | - | ZNF419  | ZNF419  |
| hsa-miR-199a-5p | - | ZNF479  | ZNF479  |
| hsa-miR-199a-5p | - | ZNF503  | ZNF503  |
| hsa-miR-199a-5p | - | ZNF562  | ZNF562  |
| hsa-miR-199a-5p | - | ZNF572  | ZNF572  |
| hsa-miR-199a-5p | - | ZNF573  | ZNF573  |
| hsa-miR-199a-5p | - | ZNF579  | ZNF579  |

|                 |   |          |          |
|-----------------|---|----------|----------|
| hsa-miR-199a-5p | - | ZNF611   | ZNF611   |
| hsa-miR-199a-5p | - | ZNF700   | ZNF700   |
| hsa-miR-199a-5p | - | ZNF710   | ZNF710   |
| hsa-miR-199b-5p | - | A2ML1    | A2ML1    |
| hsa-miR-199b-5p | - | AADAT    | AADAT    |
| hsa-miR-199b-5p | - | ABCC3    | ABCC3    |
| hsa-miR-199b-5p | - | ACP2     | ACP2     |
| hsa-miR-199b-5p | - | ACPP     | ACPP     |
| hsa-miR-199b-5p | - | ACPT     | ACPT     |
| hsa-miR-199b-5p | - | AGBL5    | AGBL5    |
| hsa-miR-199b-5p | - | ALOX12P2 | ALOX12P2 |
| hsa-miR-199b-5p | - | ALS2     | ALS2     |
| hsa-miR-199b-5p | - | APBB1    | APBB1    |
| hsa-miR-199b-5p | - | APOL2    | APOL2    |
| hsa-miR-199b-5p | - | ARHGAP21 | ARHGAP21 |
| hsa-miR-199b-5p | - | ARIH2    | ARIH2    |
| hsa-miR-199b-5p | - | ARL6IP1  | ARL6IP1  |
| hsa-miR-199b-5p | - | ARRB2    | ARRB2    |
| hsa-miR-199b-5p | - | ARRDC2   | ARRDC2   |
| hsa-miR-199b-5p | - | ASPHD1   | ASPHD1   |
| hsa-miR-199b-5p | - | ATAD3A   | ATAD3A   |
| hsa-miR-199b-5p | - | ATP13A2  | ATP13A2  |
| hsa-miR-199b-5p | - | ATP6V1D  | ATP6V1D  |
| hsa-miR-199b-5p | - | ATP6V1H  | ATP6V1H  |
| hsa-miR-199b-5p | - | ATXN7L1  | ATXN7L1  |
| hsa-miR-199b-5p | - | AVPR1B   | AVPR1B   |
| hsa-miR-199b-5p | - | B3GALT1  | B3GALT1  |
| hsa-miR-199b-5p | - | B3GNT1   | B3GNT1   |

|                 |   |           |           |
|-----------------|---|-----------|-----------|
| hsa-miR-199b-5p | - | BAG1      | BAG1      |
| hsa-miR-199b-5p | - | BCAM      | BCAM      |
| hsa-miR-199b-5p | - | BCHE      | BCHE      |
| hsa-miR-199b-5p | - | BMP3      | BMP3      |
| hsa-miR-199b-5p | - | BPIL2     | BPIL2     |
| hsa-miR-199b-5p | - | BTN2A2    | BTN2A2    |
| hsa-miR-199b-5p | - | BTN2A3    | BTN2A3    |
| hsa-miR-199b-5p | - | C11orf9   | C11orf9   |
| hsa-miR-199b-5p | - | C14orf159 | C14orf159 |
| hsa-miR-199b-5p | - | C14orf179 | C14orf179 |
| hsa-miR-199b-5p | - | C15orf24  | C15orf24  |
| hsa-miR-199b-5p | - | C17orf63  | C17orf63  |
| hsa-miR-199b-5p | - | C1QL3     | C1QL3     |
| hsa-miR-199b-5p | - | C1orf105  | C1orf105  |
| hsa-miR-199b-5p | - | C20orf3   | C20orf3   |
| hsa-miR-199b-5p | - | C4orf35   | C4orf35   |
| hsa-miR-199b-5p | - | C9orf5    | C9orf5    |
| hsa-miR-199b-5p | - | CACNA1S   | CACNA1S   |
| hsa-miR-199b-5p | - | CADPS     | CADPS     |
| hsa-miR-199b-5p | - | CAP1      | CAP1      |
| hsa-miR-199b-5p | - | CAPS2     | CAPS2     |
| hsa-miR-199b-5p | - | CCDC104   | CCDC104   |
| hsa-miR-199b-5p | - | CCNL1     | CCNL1     |
| hsa-miR-199b-5p | - | CCR7      | CCR7      |
| hsa-miR-199b-5p | - | CD48      | CD48      |
| hsa-miR-199b-5p | - | CD5L      | CD5L      |
| hsa-miR-199b-5p | - | CDCA7L    | CDCA7L    |
| hsa-miR-199b-5p | - | CDH17     | CDH17     |



|                 |   |          |          |
|-----------------|---|----------|----------|
| hsa-miR-199b-5p | - | CDH2     | CDH2     |
| hsa-miR-199b-5p | - | CDK7     | CDK7     |
| hsa-miR-199b-5p | - | CDK9     | CDK9     |
| hsa-miR-199b-5p | - | CEACAM3  | CEACAM3  |
| hsa-miR-199b-5p | - | CGRRF1   | CGRRF1   |
| hsa-miR-199b-5p | - | CHCHD7   | CHCHD7   |
| hsa-miR-199b-5p | - | CLK2     | CLK2     |
| hsa-miR-199b-5p | - | CNKSR2   | CNKSR2   |
| hsa-miR-199b-5p | - | CNTNAP3B | CNTNAP3B |
| hsa-miR-199b-5p | - | COPS6    | COPS6    |
| hsa-miR-199b-5p | - | CRCT1    | CRCT1    |
| hsa-miR-199b-5p | - | CREM     | CREM     |
| hsa-miR-199b-5p | - | CSTF2    | CSTF2    |
| hsa-miR-199b-5p | - | CTSL1    | CTSL1    |
| hsa-miR-199b-5p | - | CXCL16   | CXCL16   |
| hsa-miR-199b-5p | - | CXorf48  | CXorf48  |
| hsa-miR-199b-5p | - | CYB5R2   | CYB5R2   |
| hsa-miR-199b-5p | - | DDR1     | DDR1     |
| hsa-miR-199b-5p | - | DEPDC1B  | DEPDC1B  |
| hsa-miR-199b-5p | - | DERL2    | DERL2    |
| hsa-miR-199b-5p | - | DNAH7    | DNAH7    |
| hsa-miR-199b-5p | - | DNASE1L1 | DNASE1L1 |
| hsa-miR-199b-5p | - | DPP8     | DPP8     |
| hsa-miR-199b-5p | - | DTNBP1   | DTNBP1   |
| hsa-miR-199b-5p | - | DUSP14   | DUSP14   |
| hsa-miR-199b-5p | - | DYNLRB2  | DYNLRB2  |
| hsa-miR-199b-5p | - | EBP      | EBP      |
| hsa-miR-199b-5p | - | ECE1     | ECE1     |

|                 |   |         |         |
|-----------------|---|---------|---------|
| hsa-miR-199b-5p | - | EEA1    | EEA1    |
| hsa-miR-199b-5p | - | EFNA5   | EFNA5   |
| hsa-miR-199b-5p | - | EGF     | EGF     |
| hsa-miR-199b-5p | - | EHD4    | EHD4    |
| hsa-miR-199b-5p | - | EIF5B   | EIF5B   |
| hsa-miR-199b-5p | - | ELAVL4  | ELAVL4  |
| hsa-miR-199b-5p | - | ENO3    | ENO3    |
| hsa-miR-199b-5p | - | EPB41L1 | EPB41L1 |
| hsa-miR-199b-5p | - | EPB41L3 | EPB41L3 |
| hsa-miR-199b-5p | - | EPHB6   | EPHB6   |
| hsa-miR-199b-5p | - | ESD     | ESD     |
| hsa-miR-199b-5p | - | FAM104B | FAM104B |
| hsa-miR-199b-5p | - | FAM26F  | FAM26F  |
| hsa-miR-199b-5p | - | FAM5B   | FAM5B   |
| hsa-miR-199b-5p | - | FCAMR   | FCAMR   |
| hsa-miR-199b-5p | - | FCGRT   | FCGRT   |
| hsa-miR-199b-5p | - | FGF23   | FGF23   |
| hsa-miR-199b-5p | - | FGFBP2  | FGFBP2  |
| hsa-miR-199b-5p | - | FHAD1   | FHAD1   |
| hsa-miR-199b-5p | - | FKBP15  | FKBP15  |
| hsa-miR-199b-5p | - | FSD1    | FSD1    |
| hsa-miR-199b-5p | - | FUBP1   | FUBP1   |
| hsa-miR-199b-5p | - | FXYD3   | FXYD3   |
| hsa-miR-199b-5p | - | GABRE   | GABRE   |
| hsa-miR-199b-5p | - | GALE    | GALE    |
| hsa-miR-199b-5p | - | GARNL3  | GARNL3  |
| hsa-miR-199b-5p | - | GAS2L2  | GAS2L2  |
| hsa-miR-199b-5p | - | GFRAL   | GFRAL   |

|                 |   |         |         |
|-----------------|---|---------|---------|
| hsa-miR-199b-5p | - | GJA5    | GJA5    |
| hsa-miR-199b-5p | - | GJB3    | GJB3    |
| hsa-miR-199b-5p | - | GNG5    | GNG5    |
| hsa-miR-199b-5p | - | GON4L   | GON4L   |
| hsa-miR-199b-5p | - | GPBP1L1 | GPBP1L1 |
| hsa-miR-199b-5p | - | GPLD1   | GPLD1   |
| hsa-miR-199b-5p | - | GPR39   | GPR39   |
| hsa-miR-199b-5p | - | GPR89A  | GPR89A  |
| hsa-miR-199b-5p | - | GPR89B  | GPR89B  |
| hsa-miR-199b-5p | - | GRIN3B  | GRIN3B  |
| hsa-miR-199b-5p | - | GRTP1   | GRTP1   |
| hsa-miR-199b-5p | - | GSK3B   | GSK3B   |
| hsa-miR-199b-5p | - | GSS     | GSS     |
| hsa-miR-199b-5p | - | GSTM2   | GSTM2   |
| hsa-miR-199b-5p | - | GZMB    | GZMB    |
| hsa-miR-199b-5p | - | HDAC9   | HDAC9   |
| hsa-miR-199b-5p | - | HDDC2   | HDDC2   |
| hsa-miR-199b-5p | - | HDHD1A  | HDHD1A  |
| hsa-miR-199b-5p | - | HECTD3  | HECTD3  |
| hsa-miR-199b-5p | - | HERC6   | HERC6   |
| hsa-miR-199b-5p | - | HIAT1   | HIAT1   |
| hsa-miR-199b-5p | - | HIRA    | HIRA    |
| hsa-miR-199b-5p | - | HMGA2   | HMGA2   |
| hsa-miR-199b-5p | - | HSPA8   | HSPA8   |
| hsa-miR-199b-5p | - | IFIT2   | IFIT2   |
| hsa-miR-199b-5p | - | IGFBP1  | IGFBP1  |
| hsa-miR-199b-5p | - | IKBKB   | IKBKB   |
| hsa-miR-199b-5p | - | IL12RB2 | IL12RB2 |

|                 |   |          |          |
|-----------------|---|----------|----------|
| hsa-miR-199b-5p | - | IL13     | IL13     |
| hsa-miR-199b-5p | - | IL20RB   | IL20RB   |
| hsa-miR-199b-5p | - | IMPG2    | IMPG2    |
| hsa-miR-199b-5p | - | INPP4B   | INPP4B   |
| hsa-miR-199b-5p | - | KCNC3    | KCNC3    |
| hsa-miR-199b-5p | - | KCNH2    | KCNH2    |
| hsa-miR-199b-5p | - | KCTD21   | KCTD21   |
| hsa-miR-199b-5p | - | KIAA0748 | KIAA0748 |
| hsa-miR-199b-5p | - | KIF9     | KIF9     |
| hsa-miR-199b-5p | - | KLHL32   | KLHL32   |
| hsa-miR-199b-5p | - | KLK7     | KLK7     |
| hsa-miR-199b-5p | - | KRT37    | KRT37    |
| hsa-miR-199b-5p | - | LARGE    | LARGE    |
| hsa-miR-199b-5p | - | LHX4     | LHX4     |
| hsa-miR-199b-5p | - | LILRA5   | LILRA5   |
| hsa-miR-199b-5p | - | LMAN2    | LMAN2    |
| hsa-miR-199b-5p | - | LRRC17   | LRRC17   |
| hsa-miR-199b-5p | - | LRRC61   | LRRC61   |
| hsa-miR-199b-5p | - | LUZP1    | LUZP1    |
| hsa-miR-199b-5p | - | LXN      | LXN      |
| hsa-miR-199b-5p | - | LY6K     | LY6K     |
| hsa-miR-199b-5p | - | LYRM2    | LYRM2    |
| hsa-miR-199b-5p | - | M6PR     | M6PR     |
| hsa-miR-199b-5p | - | MAP2K5   | MAP2K5   |
| hsa-miR-199b-5p | - | MAP3K11  | MAP3K11  |
| hsa-miR-199b-5p | - | MAP3K12  | MAP3K12  |
| hsa-miR-199b-5p | - | MAP7D2   | MAP7D2   |
| hsa-miR-199b-5p | - | MARCH7   | MARCH7   |

|                 |   |         |         |
|-----------------|---|---------|---------|
| hsa-miR-199b-5p | - | MCTP1   | MCTP1   |
| hsa-miR-199b-5p | - | MDGA2   | MDGA2   |
| hsa-miR-199b-5p | - | MED4    | MED4    |
| hsa-miR-199b-5p | - | MGAT4B  | MGAT4B  |
| hsa-miR-199b-5p | - | MGLL    | MGLL    |
| hsa-miR-199b-5p | - | MPP4    | MPP4    |
| hsa-miR-199b-5p | - | MYRIP   | MYRIP   |
| hsa-miR-199b-5p | - | NAB2    | NAB2    |
| hsa-miR-199b-5p | - | NAT1    | NAT1    |
| hsa-miR-199b-5p | - | NF2     | NF2     |
| hsa-miR-199b-5p | - | NFE2L3  | NFE2L3  |
| hsa-miR-199b-5p | - | NFX1    | NFX1    |
| hsa-miR-199b-5p | - | NHLH2   | NHLH2   |
| hsa-miR-199b-5p | - | NLRC3   | NLRC3   |
| hsa-miR-199b-5p | - | NLRP7   | NLRP7   |
| hsa-miR-199b-5p | - | NPEPPS  | NPEPPS  |
| hsa-miR-199b-5p | - | NPY2R   | NPY2R   |
| hsa-miR-199b-5p | - | NUDT5   | NUDT5   |
| hsa-miR-199b-5p | - | NXT2    | NXT2    |
| hsa-miR-199b-5p | - | ODZ2    | ODZ2    |
| hsa-miR-199b-5p | - | OTX1    | OTX1    |
| hsa-miR-199b-5p | - | PAN3    | PAN3    |
| hsa-miR-199b-5p | - | PCDHB18 | PCDHB18 |
| hsa-miR-199b-5p | - | PCK1    | PCK1    |
| hsa-miR-199b-5p | - | PDCD10  | PDCD10  |
| hsa-miR-199b-5p | - | PDE4DIP | PDE4DIP |
| hsa-miR-199b-5p | - | PDXDC1  | PDXDC1  |
| hsa-miR-199b-5p | - | PHTF2   | PHTF2   |

|                 |   |          |          |
|-----------------|---|----------|----------|
| hsa-miR-199b-5p | - | PIGB     | PIGB     |
| hsa-miR-199b-5p | - | PIGG     | PIGG     |
| hsa-miR-199b-5p | - | PIGS     | PIGS     |
| hsa-miR-199b-5p | - | PIK3CD   | PIK3CD   |
| hsa-miR-199b-5p | - | PLEK2    | PLEK2    |
| hsa-miR-199b-5p | - | PLEKHA4  | PLEKHA4  |
| hsa-miR-199b-5p | - | PLEKHA5  | PLEKHA5  |
| hsa-miR-199b-5p | - | PLXNB1   | PLXNB1   |
| hsa-miR-199b-5p | - | PNLIPRP1 | PNLIPRP1 |
| hsa-miR-199b-5p | - | POMGNT1  | POMGNT1  |
| hsa-miR-199b-5p | - | POP4     | POP4     |
| hsa-miR-199b-5p | - | POU3F2   | POU3F2   |
| hsa-miR-199b-5p | - | PPM1L    | PPM1L    |
| hsa-miR-199b-5p | - | PPP2R1A  | PPP2R1A  |
| hsa-miR-199b-5p | - | PPP6C    | PPP6C    |
| hsa-miR-199b-5p | - | PRG4     | PRG4     |
| hsa-miR-199b-5p | - | PRKAG2   | PRKAG2   |
| hsa-miR-199b-5p | - | PRPF3    | PRPF3    |
| hsa-miR-199b-5p | - | PRY      | PRY      |
| hsa-miR-199b-5p | - | PVRL2    | PVRL2    |
| hsa-miR-199b-5p | - | RAB10    | RAB10    |
| hsa-miR-199b-5p | - | RAB21    | RAB21    |
| hsa-miR-199b-5p | - | RANBP2   | RANBP2   |
| hsa-miR-199b-5p | - | RCCD1    | RCCD1    |
| hsa-miR-199b-5p | - | RCSD1    | RCSD1    |
| hsa-miR-199b-5p | - | REG4     | REG4     |
| hsa-miR-199b-5p | - | RFPL1    | RFPL1    |
| hsa-miR-199b-5p | - | RFX3     | RFX3     |

|                 |   |          |          |
|-----------------|---|----------|----------|
| hsa-miR-199b-5p | - | RFXAP    | RFXAP    |
| hsa-miR-199b-5p | - | RGS10    | RGS10    |
| hsa-miR-199b-5p | - | RHBDF2   | RHBDF2   |
| hsa-miR-199b-5p | - | RHEBL1   | RHEBL1   |
| hsa-miR-199b-5p | - | RND1     | RND1     |
| hsa-miR-199b-5p | - | RNF113B  | RNF113B  |
| hsa-miR-199b-5p | - | ROGDI    | ROGDI    |
| hsa-miR-199b-5p | - | RPL15    | RPL15    |
| hsa-miR-199b-5p | - | RTP4     | RTP4     |
| hsa-miR-199b-5p | - | SAT1     | SAT1     |
| hsa-miR-199b-5p | - | SCIN     | SCIN     |
| hsa-miR-199b-5p | - | SELP     | SELP     |
| hsa-miR-199b-5p | - | SEMA3F   | SEMA3F   |
| hsa-miR-199b-5p | - | SEMA4D   | SEMA4D   |
| hsa-miR-199b-5p | - | SERPINE2 | SERPINE2 |
| hsa-miR-199b-5p | - | SIRT1    | SIRT1    |
| hsa-miR-199b-5p | - | SLAMF1   | SLAMF1   |
| hsa-miR-199b-5p | - | SLC10A4  | SLC10A4  |
| hsa-miR-199b-5p | - | SLC1A5   | SLC1A5   |
| hsa-miR-199b-5p | - | SLC24A2  | SLC24A2  |
| hsa-miR-199b-5p | - | SLC2A4   | SLC2A4   |
| hsa-miR-199b-5p | - | SLC35A2  | SLC35A2  |
| hsa-miR-199b-5p | - | SLC3A1   | SLC3A1   |
| hsa-miR-199b-5p | - | SLC46A2  | SLC46A2  |
| hsa-miR-199b-5p | - | SMARCA2  | SMARCA2  |
| hsa-miR-199b-5p | - | SOD1     | SOD1     |
| hsa-miR-199b-5p | - | SORCS3   | SORCS3   |
| hsa-miR-199b-5p | - | SOS2     | SOS2     |

|                 |   |         |         |
|-----------------|---|---------|---------|
| hsa-miR-199b-5p | - | SPTB    | SPTB    |
| hsa-miR-199b-5p | - | SRRM1   | SRRM1   |
| hsa-miR-199b-5p | - | STOX2   | STOX2   |
| hsa-miR-199b-5p | - | SUCLG1  | SUCLG1  |
| hsa-miR-199b-5p | - | TANC2   | TANC2   |
| hsa-miR-199b-5p | - | TARSL2  | TARSL2  |
| hsa-miR-199b-5p | - | TBC1D8  | TBC1D8  |
| hsa-miR-199b-5p | - | TCF3    | TCF3    |
| hsa-miR-199b-5p | - | TCP10L  | TCP10L  |
| hsa-miR-199b-5p | - | TCTA    | TCTA    |
| hsa-miR-199b-5p | - | TELO2   | TELO2   |
| hsa-miR-199b-5p | - | TEP1    | TEP1    |
| hsa-miR-199b-5p | - | TIMM10  | TIMM10  |
| hsa-miR-199b-5p | - | TLCD1   | TLCD1   |
| hsa-miR-199b-5p | - | TMEFF1  | TMEFF1  |
| hsa-miR-199b-5p | - | TMEM44  | TMEM44  |
| hsa-miR-199b-5p | - | TMEM63B | TMEM63B |
| hsa-miR-199b-5p | - | TMEM66  | TMEM66  |
| hsa-miR-199b-5p | - | TMEM97  | TMEM97  |
| hsa-miR-199b-5p | - | TMPO    | TMPO    |
| hsa-miR-199b-5p | - | TMPRSS5 | TMPRSS5 |
| hsa-miR-199b-5p | - | TNK1    | TNK1    |
| hsa-miR-199b-5p | - | TNR     | TNR     |
| hsa-miR-199b-5p | - | TOX3    | TOX3    |
| hsa-miR-199b-5p | - | TRIB3   | TRIB3   |
| hsa-miR-199b-5p | - | TRPM4   | TRPM4   |
| hsa-miR-199b-5p | - | TRPV1   | TRPV1   |
| hsa-miR-199b-5p | - | TSPAN5  | TSPAN5  |



|                 |   |         |         |
|-----------------|---|---------|---------|
| hsa-miR-199b-5p | - | TSPYL6  | TSPYL6  |
| hsa-miR-199b-5p | - | TST     | TST     |
| hsa-miR-199b-5p | - | TTLL2   | TTLL2   |
| hsa-miR-199b-5p | - | TXNDC11 | TXNDC11 |
| hsa-miR-199b-5p | - | TXNL1   | TXNL1   |
| hsa-miR-199b-5p | - | TXNRD1  | TXNRD1  |
| hsa-miR-199b-5p | - | UBAP1   | UBAP1   |
| hsa-miR-199b-5p | - | UBL5    | UBL5    |
| hsa-miR-199b-5p | - | UMODL1  | UMODL1  |
| hsa-miR-199b-5p | - | UNC50   | UNC50   |
| hsa-miR-199b-5p | - | USP19   | USP19   |
| hsa-miR-199b-5p | - | USP27X  | USP27X  |
| hsa-miR-199b-5p | - | USP29   | USP29   |
| hsa-miR-199b-5p | - | USPL1   | USPL1   |
| hsa-miR-199b-5p | - | WNK4    | WNK4    |
| hsa-miR-199b-5p | - | ZDHHC5  | ZDHHC5  |
| hsa-miR-199b-5p | - | ZEB1    | ZEB1    |
| hsa-miR-199b-5p | - | ZFAND2A | ZFAND2A |
| hsa-miR-199b-5p | - | ZFP2    | ZFP2    |
| hsa-miR-199b-5p | - | ZNF335  | ZNF335  |
| hsa-miR-199b-5p | - | ZNF41   | ZNF41   |
| hsa-miR-199b-5p | - | ZNF419  | ZNF419  |
| hsa-miR-199b-5p | - | ZNF462  | ZNF462  |
| hsa-miR-199b-5p | - | ZNF479  | ZNF479  |
| hsa-miR-199b-5p | - | ZNF503  | ZNF503  |
| hsa-miR-199b-5p | - | ZNF547  | ZNF547  |
| hsa-miR-199b-5p | - | ZNF562  | ZNF562  |
| hsa-miR-199b-5p | - | ZNF572  | ZNF572  |

|                 |          |          |         |
|-----------------|----------|----------|---------|
| hsa-miR-199b-5p | -        | ZNF573   | ZNF573  |
| hsa-miR-199b-5p | -        | ZNF579   | ZNF579  |
| hsa-miR-199b-5p | -        | ZNF611   | ZNF611  |
| hsa-miR-199b-5p | -        | ZNF700   | ZNF700  |
| hsa-miR-199b-5p | -        | ZNF710   | ZNF710  |
| hsa-miR-19a     | ABCA1    | ABCA1    | -       |
| hsa-miR-19a     | -        | ABCB1    | ABCB1   |
| hsa-miR-19a     | -        | ABCB7    | ABCB7   |
| hsa-miR-19a     | -        | ABCC3    | ABCC3   |
| hsa-miR-19a     | ABCE1    | ABCE1    | -       |
| hsa-miR-19a     | ABR      | ABR      | -       |
| hsa-miR-19a     | ACADSB   | ACADSB   | -       |
| hsa-miR-19a     | ACCN4    | ACCN4    | -       |
| hsa-miR-19a     | -        | ACOX3    | ACOX3   |
| hsa-miR-19a     | ACSL1    | ACSL1    | -       |
| hsa-miR-19a     | ACSL4    | ACSL4    | -       |
| hsa-miR-19a     | -        | ACTL6A   | ACTL6A  |
| hsa-miR-19a     | ADAM12   | ADAM12   | -       |
| hsa-miR-19a     | ADAMTS18 | ADAMTS18 | -       |
| hsa-miR-19a     | ADAMTSL3 | ADAMTSL3 | -       |
| hsa-miR-19a     | ADCY7    | ADCY7    | -       |
| hsa-miR-19a     | ADIPOR2  | ADIPOR2  | -       |
| hsa-miR-19a     | ADNP     | ADNP     | -       |
| hsa-miR-19a     | ADRB1    | ADRB1    | -       |
| hsa-miR-19a     | AFF1     | AFF1     | -       |
| hsa-miR-19a     | AGPAT5   | AGPAT5   | -       |
| hsa-miR-19a     | AKAP1    | AKAP1    | -       |
| hsa-miR-19a     | AKAP7    | AKAP7    | -       |
| hsa-miR-19a     | ALG13    | -        | ALG13   |
| hsa-miR-19a     | ALG2     | ALG2     | -       |
| hsa-miR-19a     | -        | ALPK1    | ALPK1   |
| hsa-miR-19a     | AMMECR1L | AMMECR1L | -       |
| hsa-miR-19a     | ANKIB1   | ANKIB1   | -       |
| hsa-miR-19a     | -        | ANKRD10  | ANKRD10 |
| hsa-miR-19a     | ANKRD12  | ANKRD12  | -       |
| hsa-miR-19a     | ANKRD13C | ANKRD13C | -       |
| hsa-miR-19a     | ANKRD34A | ANKRD34A | -       |
| hsa-miR-19a     | ANO1     | ANO1     | -       |
| hsa-miR-19a     | ANO5     | ANO5     | -       |
| hsa-miR-19a     | ANTXR1   | ANTXR1   | -       |
| hsa-miR-19a     | -        | AP1G2    | AP1G2   |
| hsa-miR-19a     | APAF1    | APAF1    | -       |
| hsa-miR-19a     | APOLD1   | APOLD1   | -       |
| hsa-miR-19a     | APPL1    | APPL1    | -       |
| hsa-miR-19a     | ARAP2    | ARAP2    | -       |
| hsa-miR-19a     | ARC      | ARC      | -       |
| hsa-miR-19a     | ARFIP1   | ARFIP1   | -       |

|             |           |           |          |
|-------------|-----------|-----------|----------|
| hsa-miR-19a | ARHGAP1   | ARHGAP1   | -        |
| hsa-miR-19a | ARHGAP11A | ARHGAP11A | -        |
| hsa-miR-19a | ARHGAP12  | ARHGAP12  | -        |
| hsa-miR-19a | -         | ARHGAP21  | ARHGAP21 |
| hsa-miR-19a | ARHGAP5   | ARHGAP5   | -        |
| hsa-miR-19a | ARHGEF12  | ARHGEF12  | -        |
| hsa-miR-19a | -         | ARHGEF5   | ARHGEF5  |
| hsa-miR-19a | ARID4B    | ARID4B    | -        |
| hsa-miR-19a | ARIH2     | ARIH2     | -        |
| hsa-miR-19a | ARPP19    | ARPP19    | -        |
| hsa-miR-19a | ARRDC3    | ARRDC3    | -        |
| hsa-miR-19a | ARRDC4    | ARRDC4    | -        |
| hsa-miR-19a | ASAP2     | ASAP2     | -        |
| hsa-miR-19a | ASCL1     | ASCL1     | -        |
| hsa-miR-19a | ASXL2     | ASXL2     | -        |
| hsa-miR-19a | -         | ATF7IP2   | ATF7IP2  |
| hsa-miR-19a | ATG16L1   | ATG16L1   | -        |
| hsa-miR-19a | ATL2      | ATL2      | -        |
| hsa-miR-19a | ATP11A    | ATP11A    | -        |
| hsa-miR-19a | -         | ATP12A    | ATP12A   |
| hsa-miR-19a | ATP1A2    | ATP1A2    | -        |
| hsa-miR-19a | ATP2C1    | ATP2C1    | -        |
| hsa-miR-19a | -         | ATP6V0E1  | ATP6V0E1 |
| hsa-miR-19a | ATP6V1B2  | ATP6V1B2  | -        |
| hsa-miR-19a | ATRX      | ATRX      | -        |
| hsa-miR-19a | ATXN1     | ATXN1     | -        |
| hsa-miR-19a | ATXN7     | ATXN7     | -        |
| hsa-miR-19a | ATXN7L1   | ATXN7L1   | -        |
| hsa-miR-19a | B4GALT5   | B4GALT5   | -        |
| hsa-miR-19a | BACE1     | BACE1     | -        |
| hsa-miR-19a | -         | BANK1     | BANK1    |
| hsa-miR-19a | -         | BARD1     | BARD1    |
| hsa-miR-19a | BCAR3     | BCAR3     | -        |
| hsa-miR-19a | BCAT1     | BCAT1     | -        |
| hsa-miR-19a | BCL2L11   | BCL2L11   | -        |
| hsa-miR-19a | -         | BCL2L14   | BCL2L14  |
| hsa-miR-19a | -         | BCMO1     | BCMO1    |
| hsa-miR-19a | BEND3     | BEND3     | -        |
| hsa-miR-19a | BEND4     | BEND4     | -        |
| hsa-miR-19a | BLCAP     | BLCAP     | -        |
| hsa-miR-19a | BMP3      | BMP3      | -        |
| hsa-miR-19a | BMPR2     | BMPR2     | -        |
| hsa-miR-19a | BNC2      | BNC2      | -        |
| hsa-miR-19a | BPTF      | BPTF      | -        |
| hsa-miR-19a | BRWD1     | BRWD1     | -        |
| hsa-miR-19a | BTBD7     | BTBD7     | -        |
| hsa-miR-19a | BTF3L4    | BTF3L4    | -        |
| hsa-miR-19a | BZRAP1    | BZRAP1    | -        |
| hsa-miR-19a | C10orf140 | C10orf140 | -        |
| hsa-miR-19a | C10orf26  | C10orf26  | -        |
| hsa-miR-19a | C10orf46  | C10orf46  | -        |

|             |           |           |          |
|-------------|-----------|-----------|----------|
| hsa-miR-19a | -         | C10orf71  | C10orf71 |
| hsa-miR-19a | C11orf30  | C11orf30  | -        |
| hsa-miR-19a | C12orf12  | C12orf12  | -        |
| hsa-miR-19a | -         | C12orf48  | C12orf48 |
| hsa-miR-19a | C12orf53  | C12orf53  | -        |
| hsa-miR-19a | -         | C13orf18  | C13orf18 |
| hsa-miR-19a | -         | C13orf33  | C13orf33 |
| hsa-miR-19a | C14orf147 | C14orf147 | -        |
| hsa-miR-19a | C16orf52  | C16orf52  | -        |
| hsa-miR-19a | C16orf70  | C16orf70  | -        |
| hsa-miR-19a | C17orf80  | C17orf80  | -        |
| hsa-miR-19a | -         | C17orf86  | C17orf86 |
| hsa-miR-19a | -         | C19orf52  | C19orf52 |
| hsa-miR-19a | -         | C1orf63   | C1orf63  |
| hsa-miR-19a | C20orf194 | C20orf194 | -        |
| hsa-miR-19a | C21orf91  | C21orf91  | -        |
| hsa-miR-19a | -         | C2orf15   | C2orf15  |
| hsa-miR-19a | -         | C2orf43   | C2orf43  |
| hsa-miR-19a | C3orf64   | C3orf64   | -        |
| hsa-miR-19a | C3orf70   | C3orf70   | -        |
| hsa-miR-19a | -         | C5        | C5       |
| hsa-miR-19a | C5orf30   | C5orf30   | -        |
| hsa-miR-19a | C5orf41   | C5orf41   | -        |
| hsa-miR-19a | -         | C6orf120  | C6orf120 |
| hsa-miR-19a | -         | C6orf142  | C6orf142 |
| hsa-miR-19a | C6orf222  | C6orf222  | -        |
| hsa-miR-19a | C7orf60   | C7orf60   | -        |
| hsa-miR-19a | C8orf4    | C8orf4    | -        |
| hsa-miR-19a | -         | C9orf103  | C9orf103 |
| hsa-miR-19a | C9orf5    | C9orf5    | -        |
| hsa-miR-19a | C9orf69   | C9orf69   | -        |
| hsa-miR-19a | -         | CA5B      | CA5B     |
| hsa-miR-19a | CAB39     | CAB39     | -        |
| hsa-miR-19a | -         | CABP7     | CABP7    |
| hsa-miR-19a | CACNA1C   | CACNA1C   | -        |
| hsa-miR-19a | CALD1     | CALD1     | -        |
| hsa-miR-19a | CALM1     | CALM1     | -        |
| hsa-miR-19a | -         | CAMK2N1   | CAMK2N1  |
| hsa-miR-19a | CAMSAP1   | CAMSAP1   | -        |
| hsa-miR-19a | CAMSAP1L1 | CAMSAP1L1 | -        |
| hsa-miR-19a | CAND1     | CAND1     | -        |
| hsa-miR-19a | -         | CAPRIN2   | CAPRIN2  |
| hsa-miR-19a | CASK      | CASK      | -        |
| hsa-miR-19a | -         | CASP8     | CASP8    |
| hsa-miR-19a | CASZ1     | CASZ1     | -        |
| hsa-miR-19a | CBFA2T2   | CBFA2T2   | -        |
| hsa-miR-19a | CBFB      | CBFB      | -        |
| hsa-miR-19a | CBLN2     | CBLN2     | -        |
| hsa-miR-19a | CBX7      | CBX7      | -        |
| hsa-miR-19a | CCDC152   | CCDC152   | -        |
| hsa-miR-19a | CCDC47    | CCDC47    | -        |

|             |          |          |         |
|-------------|----------|----------|---------|
| hsa-miR-19a | CCDC6    | CCDC6    | -       |
| hsa-miR-19a | CCDC88A  | CCDC88A  | -       |
| hsa-miR-19a | -        | CCNA2    | CCNA2   |
| hsa-miR-19a | CCND1    | CCND1    | -       |
| hsa-miR-19a | CCND2    | CCND2    | -       |
| hsa-miR-19a | -        | CCPG1    | CCPG1   |
| hsa-miR-19a | CD164    | CD164    | -       |
| hsa-miR-19a | -        | CD69     | CD69    |
| hsa-miR-19a | -        | CD72     | CD72    |
| hsa-miR-19a | CDC42BPA | CDC42BPA | -       |
| hsa-miR-19a | -        | CDH11    | CDH11   |
| hsa-miR-19a | -        | CDH2     | CDH2    |
| hsa-miR-19a | CDK13    | CDK13    | -       |
| hsa-miR-19a | CDK19    | CDK19    | -       |
| hsa-miR-19a | -        | CDK2AP1  | CDK2AP1 |
| hsa-miR-19a | CEP170   | CEP170   | -       |
| hsa-miR-19a | -        | CEP192   | CEP192  |
| hsa-miR-19a | CEP350   | CEP350   | -       |
| hsa-miR-19a | CEP55    | CEP55    | -       |
| hsa-miR-19a | CGN      | CGN      | -       |
| hsa-miR-19a | CHD2     | CHD2     | -       |
| hsa-miR-19a | CHIC1    | CHIC1    | -       |
| hsa-miR-19a | -        | CHIC2    | CHIC2   |
| hsa-miR-19a | CISD3    | CISD3    | -       |
| hsa-miR-19a | CIT      | CIT      | -       |
| hsa-miR-19a | -        | CKAP5    | CKAP5   |
| hsa-miR-19a | CLCN6    | CLCN6    | -       |
| hsa-miR-19a | CLIP1    | CLIP1    | -       |
| hsa-miR-19a | CLIP4    | CLIP4    | -       |
| hsa-miR-19a | CLOCK    | CLOCK    | -       |
| hsa-miR-19a | CLTC     | CLTC     | -       |
| hsa-miR-19a | -        | CLUL1    | CLUL1   |
| hsa-miR-19a | CNGA3    | CNGA3    | -       |
| hsa-miR-19a | CNOT6    | CNOT6    | -       |
| hsa-miR-19a | CNOT6L   | CNOT6L   | -       |
| hsa-miR-19a | CNOT7    | CNOT7    | -       |
| hsa-miR-19a | CNR1     | CNR1     | -       |
| hsa-miR-19a | -        | COL16A1  | COL16A1 |
| hsa-miR-19a | COL19A1  | COL19A1  | -       |
| hsa-miR-19a | -        | COL1A2   | COL1A2  |
| hsa-miR-19a | -        | COPS4    | COPS4   |
| hsa-miR-19a | COQ10B   | COQ10B   | -       |
| hsa-miR-19a | COX15    | COX15    | -       |
| hsa-miR-19a | -        | COX8C    | COX8C   |
| hsa-miR-19a | CPD      | CPD      | -       |
| hsa-miR-19a | CPEB1    | CPEB1    | -       |
| hsa-miR-19a | CPEB3    | CPEB3    | -       |
| hsa-miR-19a | CPEB4    | CPEB4    | -       |
| hsa-miR-19a | -        | CRABP1   | CRABP1  |
| hsa-miR-19a | CREBL2   | CREBL2   | -       |
| hsa-miR-19a | -        | CRTC3    | CRTC3   |

|             |          |          |         |
|-------------|----------|----------|---------|
| hsa-miR-19a | -        | CRY1     | CRY1    |
| hsa-miR-19a | CS       | CS       | -       |
| hsa-miR-19a | -        | CSE1L    | CSE1L   |
| hsa-miR-19a | -        | CSF1     | CSF1    |
| hsa-miR-19a | CSF2RB   | CSF2RB   | -       |
| hsa-miR-19a | CSMD1    | CSMD1    | -       |
| hsa-miR-19a | CSNK1G1  | CSNK1G1  | -       |
| hsa-miR-19a | CSRNP3   | CSRNP3   | -       |
| hsa-miR-19a | CTGF     | CTGF     | -       |
| hsa-miR-19a | CUX1     | CUX1     | -       |
| hsa-miR-19a | CXCL12   | CXCL12   | -       |
| hsa-miR-19a | CYB561D1 | CYB561D1 | -       |
| hsa-miR-19a | CYLD     | CYLD     | -       |
| hsa-miR-19a | -        | CYP4F8   | CYP4F8  |
| hsa-miR-19a | DAAM1    | DAAM1    | -       |
| hsa-miR-19a | -        | DAD1     | DAD1    |
| hsa-miR-19a | DAG1     | DAG1     | -       |
| hsa-miR-19a | DBN1     | DBN1     | -       |
| hsa-miR-19a | DCAF7    | DCAF7    | -       |
| hsa-miR-19a | DCAF8    | DCAF8    | -       |
| hsa-miR-19a | DCBLD2   | DCBLD2   | -       |
| hsa-miR-19a | DCUN1D1  | DCUN1D1  | -       |
| hsa-miR-19a | DCUN1D3  | DCUN1D3  | -       |
| hsa-miR-19a | -        | DDX26B   | DDX26B  |
| hsa-miR-19a | DDX3X    | DDX3X    | -       |
| hsa-miR-19a | DDX3Y    | DDX3Y    | -       |
| hsa-miR-19a | DDX6     | DDX6     | -       |
| hsa-miR-19a | DENND1A  | DENND1A  | -       |
| hsa-miR-19a | -        | DENND1B  | DENND1B |
| hsa-miR-19a | -        | DET1     | DET1    |
| hsa-miR-19a | DGKE     | DGKE     | -       |
| hsa-miR-19a | DICER1   | DICER1   | -       |
| hsa-miR-19a | DIP2A    | DIP2A    | -       |
| hsa-miR-19a | DIRAS2   | DIRAS2   | -       |
| hsa-miR-19a | DIRC2    | -        | DIRC2   |
| hsa-miR-19a | -        | DIS3L2   | DIS3L2  |
| hsa-miR-19a | DKK3     | DKK3     | -       |
| hsa-miR-19a | DLG5     | DLG5     | -       |
| hsa-miR-19a | DLX1     | DLX1     | -       |
| hsa-miR-19a | DLX3     | DLX3     | -       |
| hsa-miR-19a | DMXL2    | DMXL2    | -       |
| hsa-miR-19a | DNAJB1   | DNAJB1   | -       |
| hsa-miR-19a | -        | DNAJC1   | DNAJC1  |
| hsa-miR-19a | DNAJC16  | DNAJC16  | -       |
| hsa-miR-19a | DNAL1    | DNAL1    | -       |
| hsa-miR-19a | -        | DNM1L    | DNM1L   |
| hsa-miR-19a | -        | DNPEP    | DNPEP   |
| hsa-miR-19a | DOCK3    | DOCK3    | -       |
| hsa-miR-19a | DOCK4    | DOCK4    | -       |
| hsa-miR-19a | DOCK5    | DOCK5    | -       |
| hsa-miR-19a | DPYSL5   | DPYSL5   | -       |

|             |          |          |          |
|-------------|----------|----------|----------|
| hsa-miR-19a | DSCAM    | DSCAM    | -        |
| hsa-miR-19a | DTNA     | DTNA     | -        |
| hsa-miR-19a | -        | DUSP11   | DUSP11   |
| hsa-miR-19a | DUSP7    | DUSP7    | -        |
| hsa-miR-19a | -        | DUT      | DUT      |
| hsa-miR-19a | -        | DYNC1LI1 | DYNC1LI1 |
| hsa-miR-19a | DYNC1LI2 | DYNC1LI2 | -        |
| hsa-miR-19a | -        | DYNLL2   | DYNLL2   |
| hsa-miR-19a | EBF1     | EBF1     | -        |
| hsa-miR-19a | -        | ECM2     | ECM2     |
| hsa-miR-19a | EDARADD  | EDARADD  | -        |
| hsa-miR-19a | EDNRB    | EDNRB    | -        |
| hsa-miR-19a | EFNB2    | EFNB2    | -        |
| hsa-miR-19a | EFR3A    | EFR3A    | -        |
| hsa-miR-19a | EGR3     | EGR3     | -        |
| hsa-miR-19a | -        | EGR4     | EGR4     |
| hsa-miR-19a | EIF2C1   | EIF2C1   | -        |
| hsa-miR-19a | EIF4A2   | EIF4A2   | -        |
| hsa-miR-19a | EIF4E3   | EIF4E3   | -        |
| hsa-miR-19a | EIF4G2   | EIF4G2   | -        |
| hsa-miR-19a | ELAVL1   | ELAVL1   | -        |
| hsa-miR-19a | ELK4     | -        | ELK4     |
| hsa-miR-19a | ELL2     | ELL2     | -        |
| hsa-miR-19a | ELMOD2   | ELMOD2   | -        |
| hsa-miR-19a | ELOVL5   | ELOVL5   | -        |
| hsa-miR-19a | EMX2     | EMX2     | -        |
| hsa-miR-19a | ENC1     | ENC1     | -        |
| hsa-miR-19a | -        | ENPP2    | ENPP2    |
| hsa-miR-19a | ENPP4    | ENPP4    | -        |
| hsa-miR-19a | EPB41L5  | EPB41L5  | -        |
| hsa-miR-19a | EPC2     | EPC2     | -        |
| hsa-miR-19a | EPHB3    | EPHB3    | -        |
| hsa-miR-19a | EPHX4    | EPHX4    | -        |
| hsa-miR-19a | EPN2     | EPN2     | -        |
| hsa-miR-19a | EPS15    | EPS15    | -        |
| hsa-miR-19a | ERBB3    | ERBB3    | -        |
| hsa-miR-19a | -        | ERCC4    | ERCC4    |
| hsa-miR-19a | EREG     | EREG     | -        |
| hsa-miR-19a | -        | ERICH1   | ERICH1   |
| hsa-miR-19a | -        | ESAM     | ESAM     |
| hsa-miR-19a | ESR1     | ESR1     | -        |
| hsa-miR-19a | ESRP2    | ESRP2    | -        |
| hsa-miR-19a | ESYT1    | ESYT1    | -        |
| hsa-miR-19a | ETNK1    | ETNK1    | -        |
| hsa-miR-19a | ETV1     | ETV1     | -        |
| hsa-miR-19a | EVI5     | EVI5     | -        |
| hsa-miR-19a | EVI5L    | EVI5L    | -        |
| hsa-miR-19a | EXOC5    | EXOC5    | -        |
| hsa-miR-19a | -        | EXOSC7   | EXOSC7   |
| hsa-miR-19a | F3       | F3       | -        |
| hsa-miR-19a | FAM108C1 | FAM108C1 | -        |

|             |           |           |         |
|-------------|-----------|-----------|---------|
| hsa-miR-19a | FAM116A   | FAM116A   | -       |
| hsa-miR-19a | -         | FAM129C   | FAM129C |
| hsa-miR-19a | FAM160A1  | FAM160A1  | -       |
| hsa-miR-19a | FAM168A   | FAM168A   | -       |
| hsa-miR-19a | FAM177B   | FAM177B   | -       |
| hsa-miR-19a | FAM178A   | FAM178A   | -       |
| hsa-miR-19a | FAM190B   | FAM190B   | -       |
| hsa-miR-19a | FAM196A   | FAM196A   | -       |
| hsa-miR-19a | FAM46A    | FAM46A    | -       |
| hsa-miR-19a | FAM73B    | FAM73B    | -       |
| hsa-miR-19a | FAM76B    | FAM76B    | -       |
| hsa-miR-19a | FBXO10    | FBXO10    | -       |
| hsa-miR-19a | -         | FBXO16    | FBXO16  |
| hsa-miR-19a | FBXO28    | FBXO28    | -       |
| hsa-miR-19a | FBXO48    | FBXO48    | -       |
| hsa-miR-19a | -         | FBXO9     | FBXO9   |
| hsa-miR-19a | FBXW11    | FBXW11    | -       |
| hsa-miR-19a | -         | FCAR      | FCAR    |
| hsa-miR-19a | FEM1C     | FEM1C     | -       |
| hsa-miR-19a | FIBIN     | FIBIN     | -       |
| hsa-miR-19a | -         | FMR1      | FMR1    |
| hsa-miR-19a | FNDC3A    | FNDC3A    | -       |
| hsa-miR-19a | FNDC3B    | FNDC3B    | -       |
| hsa-miR-19a | FOXP1     | FOXP1     | -       |
| hsa-miR-19a | FRAS1     | FRAS1     | -       |
| hsa-miR-19a | FRK       | FRK       | -       |
| hsa-miR-19a | FRMD4A    | FRMD4A    | -       |
| hsa-miR-19a | FRMD6     | FRMD6     | -       |
| hsa-miR-19a | FRMPD2    | FRMPD2    | -       |
| hsa-miR-19a | -         | FUNDC1    | FUNDC1  |
| hsa-miR-19a | FURIN     | FURIN     | -       |
| hsa-miR-19a | FUT4      | FUT4      | -       |
| hsa-miR-19a | FXR1      | FXR1      | -       |
| hsa-miR-19a | FZD6      | FZD6      | -       |
| hsa-miR-19a | G3BP2     | G3BP2     | -       |
| hsa-miR-19a | GABARAPL1 | GABARAPL1 | -       |
| hsa-miR-19a | GATAD2B   | GATAD2B   | -       |
| hsa-miR-19a | GATSL3    | GATSL3    | -       |
| hsa-miR-19a | GCC2      | GCC2      | -       |
| hsa-miR-19a | GDA       | GDA       | -       |
| hsa-miR-19a | -         | GDPD4     | GDPD4   |
| hsa-miR-19a | GGA1      | GGA1      | -       |
| hsa-miR-19a | GIGYF1    | GIGYF1    | -       |
| hsa-miR-19a | GIT2      | GIT2      | -       |
| hsa-miR-19a | GJA1      | GJA1      | -       |
| hsa-miR-19a | GLRA3     | GLRA3     | -       |
| hsa-miR-19a | GMFB      | GMFB      | -       |
| hsa-miR-19a | -         | GNPTAB    | GNPTAB  |
| hsa-miR-19a | GPBP1     | GPBP1     | -       |
| hsa-miR-19a | GPCPD1    | GPCPD1    | -       |
| hsa-miR-19a | -         | GPR110    | GPR110  |



|             |          |          |          |
|-------------|----------|----------|----------|
| hsa-miR-19a | GPR153   | GPR153   | -        |
| hsa-miR-19a | -        | GPR39    | GPR39    |
| hsa-miR-19a | GRB10    | GRB10    | -        |
| hsa-miR-19a | GRIN2A   | GRIN2A   | -        |
| hsa-miR-19a | GRSF1    | GRSF1    | -        |
| hsa-miR-19a | -        | GSTA2    | GSTA2    |
| hsa-miR-19a | -        | GTF2IRD1 | GTF2IRD1 |
| hsa-miR-19a | GULP1    | GULP1    | -        |
| hsa-miR-19a | -        | HADHA    | HADHA    |
| hsa-miR-19a | -        | HADHB    | HADHB    |
| hsa-miR-19a | HBP1     | HBP1     | -        |
| hsa-miR-19a | -        | HBS1L    | HBS1L    |
| hsa-miR-19a | HCFC2    | HCFC2    | -        |
| hsa-miR-19a | HDAC4    | HDAC4    | -        |
| hsa-miR-19a | HDAC7    | HDAC7    | -        |
| hsa-miR-19a | HDLBP    | HDLBP    | -        |
| hsa-miR-19a | HECTD3   | HECTD3   | -        |
| hsa-miR-19a | HECW2    | HECW2    | -        |
| hsa-miR-19a | HIC1     | HIC1     | -        |
| hsa-miR-19a | HIPK1    | HIPK1    | -        |
| hsa-miR-19a | -        | HIVEP2   | HIVEP2   |
| hsa-miR-19a | HLF      | HLF      | -        |
| hsa-miR-19a | HNRNPA1  | HNRNPA1  | -        |
| hsa-miR-19a | HNRNPD   | HNRNPD   | -        |
| hsa-miR-19a | HNRNPF   | HNRNPF   | -        |
| hsa-miR-19a | HNRNPU   | HNRNPU   | -        |
| hsa-miR-19a | HNRNPUL1 | HNRNPUL1 | -        |
| hsa-miR-19a | HNRNPUL2 | HNRNPUL2 | -        |
| hsa-miR-19a | HOMER1   | HOMER1   | -        |
| hsa-miR-19a | HOXA9    | HOXA9    | -        |
| hsa-miR-19a | -        | HSD11B1  | HSD11B1  |
| hsa-miR-19a | -        | HSD17B11 | HSD17B11 |
| hsa-miR-19a | -        | HSP90B1  | HSP90B1  |
| hsa-miR-19a | -        | HSPBAP1  | HSPBAP1  |
| hsa-miR-19a | HSPC159  | HSPC159  | -        |
| hsa-miR-19a | -        | HTR4     | HTR4     |
| hsa-miR-19a | ICA1L    | ICA1L    | -        |
| hsa-miR-19a | ID2      | ID2      | -        |
| hsa-miR-19a | -        | IFITM1   | IFITM1   |
| hsa-miR-19a | -        | IFNA2    | IFNA2    |
| hsa-miR-19a | IGDCC4   | IGDCC4   | -        |
| hsa-miR-19a | IGF1     | IGF1     | -        |
| hsa-miR-19a | IGF2R    | IGF2R    | -        |
| hsa-miR-19a | IGFBP3   | IGFBP3   | -        |
| hsa-miR-19a | IGSF3    | IGSF3    | -        |
| hsa-miR-19a | -        | IL18R1   | IL18R1   |
| hsa-miR-19a | IL1R1    | IL1R1    | -        |
| hsa-miR-19a | -        | IL26     | IL26     |
| hsa-miR-19a | ILF3     | ILF3     | -        |
| hsa-miR-19a | INHBB    | INHBB    | -        |
| hsa-miR-19a | INO80    | INO80    | -        |

|             |          |          |          |
|-------------|----------|----------|----------|
| hsa-miR-19a | INSIG1   | INSIG1   | -        |
| hsa-miR-19a | INSIG2   | INSIG2   | -        |
| hsa-miR-19a | ITFG3    | ITFG3    | -        |
| hsa-miR-19a | ITGA2    | ITGA2    | -        |
| hsa-miR-19a | ITGA6    | ITGA6    | -        |
| hsa-miR-19a | ITGB8    | ITGB8    | -        |
| hsa-miR-19a | -        | ITPR1    | ITPR1    |
| hsa-miR-19a | ITPRIPL2 | ITPRIPL2 | -        |
| hsa-miR-19a | ITSN1    | ITSN1    | -        |
| hsa-miR-19a | -        | IWS1     | IWS1     |
| hsa-miR-19a | JARID2   | JARID2   | -        |
| hsa-miR-19a | -        | JMJD1C   | JMJD1C   |
| hsa-miR-19a | -        | JTB      | JTB      |
| hsa-miR-19a | KATNAL1  | KATNAL1  | -        |
| hsa-miR-19a | KBTBD8   | KBTBD8   | -        |
| hsa-miR-19a | KCNC4    | KCNC4    | -        |
| hsa-miR-19a | -        | KCND2    | KCND2    |
| hsa-miR-19a | -        | KCNE4    | KCNE4    |
| hsa-miR-19a | KCNH1    | KCNH1    | -        |
| hsa-miR-19a | KCNJ2    | KCNJ2    | -        |
| hsa-miR-19a | -        | KCNK1    | KCNK1    |
| hsa-miR-19a | KCNK10   | KCNK10   | -        |
| hsa-miR-19a | -        | KCNK17   | KCNK17   |
| hsa-miR-19a | KCNQ5    | KCNQ5    | -        |
| hsa-miR-19a | KCNS2    | KCNS2    | -        |
| hsa-miR-19a | KCNT2    | KCNT2    | -        |
| hsa-miR-19a | -        | KCTD4    | KCTD4    |
| hsa-miR-19a | KDM2A    | KDM2A    | -        |
| hsa-miR-19a | KDM6A    | KDM6A    | -        |
| hsa-miR-19a | KIAA0101 | KIAA0101 | -        |
| hsa-miR-19a | KIAA0528 | KIAA0528 | -        |
| hsa-miR-19a | -        | KIAA0802 | KIAA0802 |
| hsa-miR-19a | KIAA0907 | KIAA0907 | -        |
| hsa-miR-19a | KIAA1210 | KIAA1210 | -        |
| hsa-miR-19a | KIAA1211 | KIAA1211 | -        |
| hsa-miR-19a | KIAA1217 | KIAA1217 | -        |
| hsa-miR-19a | KIAA1244 | KIAA1244 | -        |
| hsa-miR-19a | KIAA1462 | KIAA1462 | -        |
| hsa-miR-19a | KIAA1468 | KIAA1468 | -        |
| hsa-miR-19a | KIAA1598 | KIAA1598 | -        |
| hsa-miR-19a | KIAA2026 | KIAA2026 | -        |
| hsa-miR-19a | KIF13A   | KIF13A   | -        |
| hsa-miR-19a | KIF1B    | KIF1B    | -        |
| hsa-miR-19a | KIF3A    | KIF3A    | -        |
| hsa-miR-19a | KIT      | KIT      | -        |
| hsa-miR-19a | KLF10    | KLF10    | -        |
| hsa-miR-19a | -        | KLF4     | KLF4     |
| hsa-miR-19a | -        | KLHDC2   | KLHDC2   |
| hsa-miR-19a | KLHDC5   | KLHDC5   | -        |
| hsa-miR-19a | KLHL20   | KLHL20   | -        |
| hsa-miR-19a | KLHL28   | KLHL28   | -        |

|             |         |         |        |
|-------------|---------|---------|--------|
| hsa-miR-19a | KLHL3   | KLHL3   | -      |
| hsa-miR-19a | KPNA3   | KPNA3   | -      |
| hsa-miR-19a | KPNA4   | KPNA4   | -      |
| hsa-miR-19a | KPNA6   | KPNA6   | -      |
| hsa-miR-19a | KRAS    | KRAS    | -      |
| hsa-miR-19a | -       | KRT15   | KRT15  |
| hsa-miR-19a | -       | KRT23   | KRT23  |
| hsa-miR-19a | L3MBTL3 | L3MBTL3 | -      |
| hsa-miR-19a | LBH     | LBH     | -      |
| hsa-miR-19a | -       | LCE2B   | LCE2B  |
| hsa-miR-19a | LCLAT1  | LCLAT1  | -      |
| hsa-miR-19a | LDLR    | LDLR    | -      |
| hsa-miR-19a | -       | LHX8    | LHX8   |
| hsa-miR-19a | LIF     | LIF     | -      |
| hsa-miR-19a | LIMCH1  | LIMCH1  | -      |
| hsa-miR-19a | LMBR1   | LMBR1   | -      |
| hsa-miR-19a | LMLN    | LMLN    | -      |
| hsa-miR-19a | LNPEP   | LNPEP   | -      |
| hsa-miR-19a | -       | LOR     | LOR    |
| hsa-miR-19a | LPGAT1  | LPGAT1  | -      |
| hsa-miR-19a | LPHN2   | LPHN2   | -      |
| hsa-miR-19a | LPPR1   | LPPR1   | -      |
| hsa-miR-19a | LRCH1   | LRCH1   | -      |
| hsa-miR-19a | LRCH2   | LRCH2   | -      |
| hsa-miR-19a | LRIG1   | LRIG1   | -      |
| hsa-miR-19a | LRP12   | LRP12   | -      |
| hsa-miR-19a | -       | LRP2BP  | LRP2BP |
| hsa-miR-19a | LRRC16A | LRRC16A | -      |
| hsa-miR-19a | -       | LRRC45  | LRRC45 |
| hsa-miR-19a | LRRC8B  | LRRC8B  | -      |
| hsa-miR-19a | LRRK1   | LRRK1   | -      |
| hsa-miR-19a | LRRK2   | LRRK2   | -      |
| hsa-miR-19a | LSM12   | LSM12   | -      |
| hsa-miR-19a | -       | LSM3    | LSM3   |
| hsa-miR-19a | LY75    | LY75    | -      |
| hsa-miR-19a | MACF1   | MACF1   | -      |
| hsa-miR-19a | -       | MAEA    | MAEA   |
| hsa-miR-19a | MAGI2   | MAGI2   | -      |
| hsa-miR-19a | MAML1   | MAML1   | -      |
| hsa-miR-19a | -       | MAN1C1  | MAN1C1 |
| hsa-miR-19a | MAP1B   | MAP1B   | -      |
| hsa-miR-19a | MAPK1   | MAPK1   | -      |
| hsa-miR-19a | MAPK14  | MAPK14  | -      |
| hsa-miR-19a | MAPK6   | MAPK6   | -      |
| hsa-miR-19a | -       | MARCH7  | MARCH7 |
| hsa-miR-19a | MATN2   | MATN2   | -      |
| hsa-miR-19a | -       | MATN3   | MATN3  |
| hsa-miR-19a | MBD2    | MBD2    | -      |
| hsa-miR-19a | MBNL1   | MBNL1   | -      |
| hsa-miR-19a | MBNL2   | MBNL2   | -      |
| hsa-miR-19a | MDFIC   | MDFIC   | -      |

|             |          |          |        |
|-------------|----------|----------|--------|
| hsa-miR-19a | MDM4     | MDM4     | -      |
| hsa-miR-19a | MECOM    | MECOM    | -      |
| hsa-miR-19a | MED12L   | MED12L   | -      |
| hsa-miR-19a | MED13    | MED13    | -      |
| hsa-miR-19a | MED13L   | MED13L   | -      |
| hsa-miR-19a | MED26    | MED26    | -      |
| hsa-miR-19a | MEF2A    | MEF2A    | -      |
| hsa-miR-19a | MEX3C    | MEX3C    | -      |
| hsa-miR-19a | -        | MFN1     | MFN1   |
| hsa-miR-19a | MFSD6    | MFSD6    | -      |
| hsa-miR-19a | MIB1     | MIB1     | -      |
| hsa-miR-19a | MICAL3   | MICAL3   | -      |
| hsa-miR-19a | MINK1    | MINK1    | -      |
| hsa-miR-19a | MKL2     | MKL2     | -      |
| hsa-miR-19a | MLEC     | MLEC     | -      |
| hsa-miR-19a | MLLT6    | MLLT6    | -      |
| hsa-miR-19a | MMGT1    | MMGT1    | -      |
| hsa-miR-19a | -        | MMP1     | MMP1   |
| hsa-miR-19a | MN1      | MN1      | -      |
| hsa-miR-19a | -        | MNS1     | MNS1   |
| hsa-miR-19a | MOBKL1A  | MOBKL1A  | -      |
| hsa-miR-19a | MPHOSPH9 | MPHOSPH9 | -      |
| hsa-miR-19a | MPRIP    | MPRIP    | -      |
| hsa-miR-19a | MPZL1    | MPZL1    | -      |
| hsa-miR-19a | -        | MREG     | MREG   |
| hsa-miR-19a | MRPL17   | MRPL17   | -      |
| hsa-miR-19a | -        | MRPL44   | MRPL44 |
| hsa-miR-19a | MST4     | MST4     | -      |
| hsa-miR-19a | MTF2     | MTF2     | -      |
| hsa-miR-19a | MTMR10   | MTMR10   | -      |
| hsa-miR-19a | MTMR12   | MTMR12   | -      |
| hsa-miR-19a | MTMR6    | MTMR6    | -      |
| hsa-miR-19a | MXD1     | MXD1     | -      |
| hsa-miR-19a | MYBL1    | MYBL1    | -      |
| hsa-miR-19a | MYCL1    | MYCL1    | -      |
| hsa-miR-19a | MYCN     | MYCN     | -      |
| hsa-miR-19a | -        | MYH11    | MYH11  |
| hsa-miR-19a | MYLIP    | MYLIP    | -      |
| hsa-miR-19a | -        | MYO9B    | MYO9B  |
| hsa-miR-19a | MYT1L    | MYT1L    | -      |
| hsa-miR-19a | NAALADL2 | NAALADL2 | -      |
| hsa-miR-19a | -        | NAB2     | NAB2   |
| hsa-miR-19a | NANP     | NANP     | -      |
| hsa-miR-19a | -        | NAP1L2   | NAP1L2 |
| hsa-miR-19a | NAPB     | NAPB     | -      |
| hsa-miR-19a | NAV1     | NAV1     | -      |
| hsa-miR-19a | NAV3     | NAV3     | -      |
| hsa-miR-19a | NBEA     | NBEA     | -      |
| hsa-miR-19a | NBEAL2   | NBEAL2   | -      |
| hsa-miR-19a | NCALD    | NCALD    | -      |
| hsa-miR-19a | -        | NCBP2    | NCBP2  |

|             |         |         |         |
|-------------|---------|---------|---------|
| hsa-miR-19a | NCKAP5  | NCKAP5  | -       |
| hsa-miR-19a | NCKIPSD | NCKIPSD | -       |
| hsa-miR-19a | NDFIP2  | NDFIP2  | -       |
| hsa-miR-19a | -       | NDUFC1  | NDUFC1  |
| hsa-miR-19a | NEK9    | NEK9    | -       |
| hsa-miR-19a | NEURL1B | NEURL1B | -       |
| hsa-miR-19a | NEUROD1 | NEUROD1 | -       |
| hsa-miR-19a | NEUROD4 | NEUROD4 | -       |
| hsa-miR-19a | NEUROG1 | NEUROG1 | -       |
| hsa-miR-19a | NF1     | NF1     | -       |
| hsa-miR-19a | NFIA    | NFIA    | -       |
| hsa-miR-19a | NFIB    | NFIB    | -       |
| hsa-miR-19a | -       | NFKBIA  | NFKBIA  |
| hsa-miR-19a | NGDN    | NGDN    | -       |
| hsa-miR-19a | -       | NGFRAP1 | NGFRAP1 |
| hsa-miR-19a | NHS     | NHS     | -       |
| hsa-miR-19a | NIPA1   | NIPA1   | -       |
| hsa-miR-19a | NIPAL2  | NIPAL2  | -       |
| hsa-miR-19a | -       | NKTR    | NKTR    |
| hsa-miR-19a | NLK     | NLK     | -       |
| hsa-miR-19a | -       | NME4    | NME4    |
| hsa-miR-19a | NOL4    | NOL4    | -       |
| hsa-miR-19a | NPAS2   | NPAS2   | -       |
| hsa-miR-19a | NPEPL1  | NPEPL1  | -       |
| hsa-miR-19a | -       | NPFFR2  | NPFFR2  |
| hsa-miR-19a | NPTN    | NPTN    | -       |
| hsa-miR-19a | NR3C2   | NR3C2   | -       |
| hsa-miR-19a | NRARP   | NRARP   | -       |
| hsa-miR-19a | NRK     | NRK     | -       |
| hsa-miR-19a | NUAK1   | NUAK1   | -       |
| hsa-miR-19a | NUDCD3  | NUDCD3  | -       |
| hsa-miR-19a | -       | NUP133  | NUP133  |
| hsa-miR-19a | NUP54   | NUP54   | -       |
| hsa-miR-19a | NUS1    | NUS1    | -       |
| hsa-miR-19a | OCRL    | OCRL    | -       |
| hsa-miR-19a | -       | ODF4    | ODF4    |
| hsa-miR-19a | -       | OGG1    | OGG1    |
| hsa-miR-19a | -       | OLFML1  | OLFML1  |
| hsa-miR-19a | -       | OSGEPL1 | OSGEPL1 |
| hsa-miR-19a | -       | OTOR    | OTOR    |
| hsa-miR-19a | OTUD1   | OTUD1   | -       |
| hsa-miR-19a | OTUD7B  | OTUD7B  | -       |
| hsa-miR-19a | PACS1   | PACS1   | -       |
| hsa-miR-19a | -       | PAFAH2  | PAFAH2  |
| hsa-miR-19a | PAPD4   | PAPD4   | -       |
| hsa-miR-19a | PARM1   | PARM1   | -       |
| hsa-miR-19a | PATL1   | PATL1   | -       |
| hsa-miR-19a | -       | PAXIP1  | PAXIP1  |
| hsa-miR-19a | -       | PBX2    | PBX2    |
| hsa-miR-19a | -       | PCDH11X | PCDH11X |
| hsa-miR-19a | -       | PCDH8   | PCDH8   |

|             |         |         |         |
|-------------|---------|---------|---------|
| hsa-miR-19a | PCDHA1  | PCDHA1  | -       |
| hsa-miR-19a | PCDHA10 | PCDHA10 | -       |
| hsa-miR-19a | PCDHA11 | PCDHA11 | -       |
| hsa-miR-19a | PCDHA12 | PCDHA12 | -       |
| hsa-miR-19a | PCDHA13 | PCDHA13 | -       |
| hsa-miR-19a | PCDHA2  | PCDHA2  | -       |
| hsa-miR-19a | PCDHA3  | PCDHA3  | -       |
| hsa-miR-19a | PCDHA4  | PCDHA4  | -       |
| hsa-miR-19a | PCDHA5  | PCDHA5  | -       |
| hsa-miR-19a | PCDHA6  | PCDHA6  | -       |
| hsa-miR-19a | PCDHA8  | PCDHA8  | -       |
| hsa-miR-19a | PCDHA9  | PCDHA9  | -       |
| hsa-miR-19a | PCDHAC1 | PCDHAC1 | -       |
| hsa-miR-19a | PCDHAC2 | PCDHAC2 | -       |
| hsa-miR-19a | PCGF5   | PCGF5   | -       |
| hsa-miR-19a | -       | PCSK6   | PCSK6   |
| hsa-miR-19a | -       | PDE4DIP | PDE4DIP |
| hsa-miR-19a | PDE5A   | PDE5A   | -       |
| hsa-miR-19a | PDE7B   | PDE7B   | -       |
| hsa-miR-19a | -       | PDHB    | PDHB    |
| hsa-miR-19a | PDIK1L  | PDIK1L  | -       |
| hsa-miR-19a | PEX5L   | PEX5L   | -       |
| hsa-miR-19a | PFKFB3  | PFKFB3  | -       |
| hsa-miR-19a | -       | PFN1    | PFN1    |
| hsa-miR-19a | PFN2    | PFN2    | -       |
| hsa-miR-19a | -       | PGM2    | PGM2    |
| hsa-miR-19a | PGM2L1  | PGM2L1  | -       |
| hsa-miR-19a | PHACTR4 | PHACTR4 | -       |
| hsa-miR-19a | PHAX    | PHAX    | -       |
| hsa-miR-19a | -       | PHC3    | PHC3    |
| hsa-miR-19a | -       | PHF11   | PHF11   |
| hsa-miR-19a | PHF13   | PHF13   | -       |
| hsa-miR-19a | PHF17   | PHF17   | -       |
| hsa-miR-19a | PHF20   | PHF20   | -       |
| hsa-miR-19a | PHLDA1  | PHLDA1  | -       |
| hsa-miR-19a | PHLDA3  | PHLDA3  | -       |
| hsa-miR-19a | PHLPP2  | PHLPP2  | -       |
| hsa-miR-19a | PHTF2   | PHTF2   | -       |
| hsa-miR-19a | PI15    | PI15    | -       |
| hsa-miR-19a | PI4KA   | PI4KA   | -       |
| hsa-miR-19a | PIK3R3  | PIK3R3  | -       |
| hsa-miR-19a | PIKFYVE | PIKFYVE | -       |
| hsa-miR-19a | PITPNM2 | PITPNM2 | -       |
| hsa-miR-19a | PKHD1   | PKHD1   | -       |
| hsa-miR-19a | PKNOX1  | PKNOX1  | -       |
| hsa-miR-19a | -       | PLAU    | PLAU    |
| hsa-miR-19a | PLCL1   | PLCL1   | -       |
| hsa-miR-19a | PLEKHM3 | PLEKHM3 | -       |
| hsa-miR-19a | PLXNA4  | PLXNA4  | -       |
| hsa-miR-19a | PMEPA1  | PMEPA1  | -       |
| hsa-miR-19a | -       | POLE4   | POLE4   |

|             |          |          |         |
|-------------|----------|----------|---------|
| hsa-miR-19a | POU3F2   | POU3F2   | -       |
| hsa-miR-19a | POU4F1   | POU4F1   | -       |
| hsa-miR-19a | -        | PPIL1    | PPIL1   |
| hsa-miR-19a | PPM1A    | PPM1A    | -       |
| hsa-miR-19a | -        | PPP1R10  | PPP1R10 |
| hsa-miR-19a | PPP1R12A | PPP1R12A | -       |
| hsa-miR-19a | PPP1R13L | PPP1R13L | -       |
| hsa-miR-19a | PPP1R15B | PPP1R15B | -       |
| hsa-miR-19a | PPP2R4   | PPP2R4   | -       |
| hsa-miR-19a | PPP2R5A  | PPP2R5A  | -       |
| hsa-miR-19a | PPP2R5E  | PPP2R5E  | -       |
| hsa-miR-19a | PPTC7    | PPTC7    | -       |
| hsa-miR-19a | PRC1     | PRC1     | -       |
| hsa-miR-19a | -        | PRCP     | PRCP    |
| hsa-miR-19a | PRICKLE2 | PRICKLE2 | -       |
| hsa-miR-19a | PRKACB   | PRKACB   | -       |
| hsa-miR-19a | PROM2    | PROM2    | -       |
| hsa-miR-19a | -        | PRPF39   | PRPF39  |
| hsa-miR-19a | -        | PRPF40A  | PRPF40A |
| hsa-miR-19a | PRR5L    | PRR5L    | -       |
| hsa-miR-19a | PRRT3    | PRRT3    | -       |
| hsa-miR-19a | -        | PRSS16   | PRSS16  |
| hsa-miR-19a | PRUNE2   | PRUNE2   | -       |
| hsa-miR-19a | -        | PSG1     | PSG1    |
| hsa-miR-19a | -        | PSG2     | PSG2    |
| hsa-miR-19a | -        | PSG6     | PSG6    |
| hsa-miR-19a | -        | PSG9     | PSG9    |
| hsa-miR-19a | PTEN     | PTEN     | -       |
| hsa-miR-19a | -        | PTGER2   | PTGER2  |
| hsa-miR-19a | PTGES3   | PTGES3   | -       |
| hsa-miR-19a | PTP4A1   | PTP4A1   | -       |
| hsa-miR-19a | PTPN21   | -        | PTPN21  |
| hsa-miR-19a | PTPRD    | PTPRD    | -       |
| hsa-miR-19a | PXDN     | PXDN     | -       |
| hsa-miR-19a | QKI      | QKI      | -       |
| hsa-miR-19a | R3HDM2   | R3HDM2   | -       |
| hsa-miR-19a | RAB14    | RAB14    | -       |
| hsa-miR-19a | RAB18    | RAB18    | -       |
| hsa-miR-19a | RAB1A    | RAB1A    | -       |
| hsa-miR-19a | -        | RAB2A    | RAB2A   |
| hsa-miR-19a | RAB33B   | RAB33B   | -       |
| hsa-miR-19a | RAB5B    | RAB5B    | -       |
| hsa-miR-19a | RAB8B    | RAB8B    | -       |
| hsa-miR-19a | RABGAP1  | RABGAP1  | -       |
| hsa-miR-19a | RACGAP1  | RACGAP1  | -       |
| hsa-miR-19a | RAD23B   | RAD23B   | -       |
| hsa-miR-19a | RAF1     | RAF1     | -       |
| hsa-miR-19a | -        | RAI2     | RAI2    |
| hsa-miR-19a | RALGPS1  | RALGPS1  | -       |
| hsa-miR-19a | RAP1B    | RAP1B    | -       |
| hsa-miR-19a | RAP2C    | RAP2C    | -       |

|             |          |          |         |
|-------------|----------|----------|---------|
| hsa-miR-19a | RAPGEFL1 | RAPGEFL1 | -       |
| hsa-miR-19a | RAPH1    | RAPH1    | -       |
| hsa-miR-19a | RASGEF1A | RASGEF1A | -       |
| hsa-miR-19a | -        | RBBP8    | RBBP8   |
| hsa-miR-19a | -        | RBKS     | RBKS    |
| hsa-miR-19a | RBM20    | RBM20    | -       |
| hsa-miR-19a | -        | RBM38    | RBM38   |
| hsa-miR-19a | RBMS3    | RBMS3    | -       |
| hsa-miR-19a | -        | RBP1     | RBP1    |
| hsa-miR-19a | RCOR3    | RCOR3    | -       |
| hsa-miR-19a | REEP1    | REEP1    | -       |
| hsa-miR-19a | RGL1     | RGL1     | -       |
| hsa-miR-19a | RGMB     | RGMB     | -       |
| hsa-miR-19a | -        | RGPD6    | RGPD6   |
| hsa-miR-19a | RGS21    | RGS21    | -       |
| hsa-miR-19a | RIC3     | RIC3     | -       |
| hsa-miR-19a | RICTOR   | RICTOR   | -       |
| hsa-miR-19a | RIMBP2   | RIMBP2   | -       |
| hsa-miR-19a | RIN2     | RIN2     | -       |
| hsa-miR-19a | RNF11    | RNF11    | -       |
| hsa-miR-19a | RNF19A   | RNF19A   | -       |
| hsa-miR-19a | RNF2     | RNF2     | -       |
| hsa-miR-19a | RNF216   | RNF216   | -       |
| hsa-miR-19a | RNF38    | RNF38    | -       |
| hsa-miR-19a | -        | RNMT     | RNMT    |
| hsa-miR-19a | ROBO2    | ROBO2    | -       |
| hsa-miR-19a | -        | ROGDI    | ROGDI   |
| hsa-miR-19a | RORA     | RORA     | -       |
| hsa-miR-19a | -        | RPAIN    | RPAIN   |
| hsa-miR-19a | RPAP3    | RPAP3    | -       |
| hsa-miR-19a | -        | RPL26L1  | RPL26L1 |
| hsa-miR-19a | RPS6KA2  | RPS6KA2  | -       |
| hsa-miR-19a | -        | RPS6KA5  | RPS6KA5 |
| hsa-miR-19a | RRAGD    | RRAGD    | -       |
| hsa-miR-19a | RTN1     | RTN1     | -       |
| hsa-miR-19a | RTN4RL1  | RTN4RL1  | -       |
| hsa-miR-19a | RUFY3    | RUFY3    | -       |
| hsa-miR-19a | RUNX1T1  | RUNX1T1  | -       |
| hsa-miR-19a | -        | RUNX2    | RUNX2   |
| hsa-miR-19a | RUNX3    | RUNX3    | -       |
| hsa-miR-19a | -        | RWDD3    | RWDD3   |
| hsa-miR-19a | S100PBP  | S100PBP  | -       |
| hsa-miR-19a | S1PR1    | S1PR1    | -       |
| hsa-miR-19a | S1PR2    | S1PR2    | -       |
| hsa-miR-19a | SAMD4A   | SAMD4A   | -       |
| hsa-miR-19a | SAMD8    | SAMD8    | -       |
| hsa-miR-19a | SAR1A    | SAR1A    | -       |
| hsa-miR-19a | SATB1    | SATB1    | -       |
| hsa-miR-19a | SBF2     | SBF2     | -       |
| hsa-miR-19a | SCML2    | SCML2    | -       |
| hsa-miR-19a | -        | SCN9A    | SCN9A   |



|             |           |           |          |
|-------------|-----------|-----------|----------|
| hsa-miR-19a | SDC1      | SDC1      | -        |
| hsa-miR-19a | -         | SEC14L1   | SEC14L1  |
| hsa-miR-19a | SEC22A    | SEC22A    | -        |
| hsa-miR-19a | SEC22B    | SEC22B    | -        |
| hsa-miR-19a | SECISBP2L | SECISBP2L | -        |
| hsa-miR-19a | SEL1L3    | SEL1L3    | -        |
| hsa-miR-19a | SEMA6D    | SEMA6D    | -        |
| hsa-miR-19a | SERINC3   | SERINC3   | -        |
| hsa-miR-19a | -         | SERPINC1  | SERPINC1 |
| hsa-miR-19a | -         | SERPINE2  | SERPINE2 |
| hsa-miR-19a | -         | SETX      | SETX     |
| hsa-miR-19a | -         | SF3B3     | SF3B3    |
| hsa-miR-19a | SGCB      | SGCB      | -        |
| hsa-miR-19a | SGK1      | SGK1      | -        |
| hsa-miR-19a | SGMS2     | SGMS2     | -        |
| hsa-miR-19a | SH3D19    | SH3D19    | -        |
| hsa-miR-19a | SH3RF3    | SH3RF3    | -        |
| hsa-miR-19a | SHANK2    | SHANK2    | -        |
| hsa-miR-19a | SHCBP1    | SHCBP1    | -        |
| hsa-miR-19a | SIK3      | SIK3      | -        |
| hsa-miR-19a | SIVA1     | SIVA1     | -        |
| hsa-miR-19a | SIX4      | SIX4      | -        |
| hsa-miR-19a | -         | SLAIN1    | SLAIN1   |
| hsa-miR-19a | -         | SLC10A4   | SLC10A4  |
| hsa-miR-19a | -         | SLC13A1   | SLC13A1  |
| hsa-miR-19a | SLC24A3   | SLC24A3   | -        |
| hsa-miR-19a | SLC24A4   | SLC24A4   | -        |
| hsa-miR-19a | SLC25A34  | SLC25A34  | -        |
| hsa-miR-19a | -         | SLC26A10  | SLC26A10 |
| hsa-miR-19a | -         | SLC27A2   | SLC27A2  |
| hsa-miR-19a | SLC2A1    | SLC2A1    | -        |
| hsa-miR-19a | SLC2A13   | SLC2A13   | -        |
| hsa-miR-19a | SLC2A4RG  | SLC2A4RG  | -        |
| hsa-miR-19a | SLC30A7   | SLC30A7   | -        |
| hsa-miR-19a | SLC31A2   | SLC31A2   | -        |
| hsa-miR-19a | -         | SLC34A1   | SLC34A1  |
| hsa-miR-19a | SLC35F1   | SLC35F1   | -        |
| hsa-miR-19a | SLC37A1   | SLC37A1   | -        |
| hsa-miR-19a | SLC48A1   | SLC48A1   | -        |
| hsa-miR-19a | SLC5A7    | SLC5A7    | -        |
| hsa-miR-19a | SLC6A6    | SLC6A6    | -        |
| hsa-miR-19a | SLC6A8    | SLC6A8    | -        |
| hsa-miR-19a | SLC8A1    | SLC8A1    | -        |
| hsa-miR-19a | SLC9A1    | SLC9A1    | -        |
| hsa-miR-19a | SLC9A2    | SLC9A2    | -        |
| hsa-miR-19a | SLMAP     | SLMAP     | -        |
| hsa-miR-19a | -         | SLTM      | SLTM     |
| hsa-miR-19a | SMAD4     | SMAD4     | -        |
| hsa-miR-19a | SMAD5     | SMAD5     | -        |
| hsa-miR-19a | SMARCD2   | SMARCD2   | -        |
| hsa-miR-19a | SMCR8     | SMCR8     | -        |

|             |         |         |         |
|-------------|---------|---------|---------|
| hsa-miR-19a | SMG1    | SMG1    | -       |
| hsa-miR-19a | SMOC1   | SMOC1   | -       |
| hsa-miR-19a | SMOC2   | SMOC2   | -       |
| hsa-miR-19a | -       | SMUG1   | SMUG1   |
| hsa-miR-19a | SMURF1  | SMURF1  | -       |
| hsa-miR-19a | -       | SNAPC3  | SNAPC3  |
| hsa-miR-19a | SNIP1   | SNIP1   | -       |
| hsa-miR-19a | SNX18   | SNX18   | -       |
| hsa-miR-19a | SNX27   | SNX27   | -       |
| hsa-miR-19a | -       | SNX3    | SNX3    |
| hsa-miR-19a | -       | SNX5    | SNX5    |
| hsa-miR-19a | SOCS3   | SOCS3   | -       |
| hsa-miR-19a | SOCS5   | SOCS5   | -       |
| hsa-miR-19a | SOCS6   | SOCS6   | -       |
| hsa-miR-19a | SOX4    | SOX4    | -       |
| hsa-miR-19a | SOX5    | SOX5    | -       |
| hsa-miR-19a | SOX6    | SOX6    | -       |
| hsa-miR-19a | SPATA2  | SPATA2  | -       |
| hsa-miR-19a | SPATS2L | SPATS2L | -       |
| hsa-miR-19a | SPEN    | SPEN    | -       |
| hsa-miR-19a | SPG20   | SPG20   | -       |
| hsa-miR-19a | SPIRE1  | SPIRE1  | -       |
| hsa-miR-19a | -       | SPTA1   | SPTA1   |
| hsa-miR-19a | -       | SQLE    | SQLE    |
| hsa-miR-19a | SRGAP2  | SRGAP2  | -       |
| hsa-miR-19a | SRGAP3  | SRGAP3  | -       |
| hsa-miR-19a | -       | ST7     | ST7     |
| hsa-miR-19a | ST8SIA3 | -       | ST8SIA3 |
| hsa-miR-19a | ST8SIA4 | ST8SIA4 | -       |
| hsa-miR-19a | STAM2   | STAM2   | -       |
| hsa-miR-19a | STAT2   | STAT2   | -       |
| hsa-miR-19a | STK35   | STK35   | -       |
| hsa-miR-19a | STK38   | STK38   | -       |
| hsa-miR-19a | STK39   | STK39   | -       |
| hsa-miR-19a | STRN3   | STRN3   | -       |
| hsa-miR-19a | STX12   | STX12   | -       |
| hsa-miR-19a | STXBP4  | STXBP4  | -       |
| hsa-miR-19a | SULF1   | SULF1   | -       |
| hsa-miR-19a | SUZ12   | SUZ12   | -       |
| hsa-miR-19a | -       | SUZ12P  | SUZ12P  |
| hsa-miR-19a | SV2A    | SV2A    | -       |
| hsa-miR-19a | SYBU    | SYBU    | -       |
| hsa-miR-19a | SYN1    | SYN1    | -       |
| hsa-miR-19a | SYNCRIP | SYNCRIP | -       |
| hsa-miR-19a | SYNM    | SYNM    | -       |
| hsa-miR-19a | SYNPO2  | SYNPO2  | -       |
| hsa-miR-19a | SYNPR   | SYNPR   | -       |
| hsa-miR-19a | SYT1    | SYT1    | -       |
| hsa-miR-19a | SYT11   | SYT11   | -       |
| hsa-miR-19a | -       | TACR2   | TACR2   |
| hsa-miR-19a | -       | TAF4B   | TAF4B   |

|             |          |          |          |
|-------------|----------|----------|----------|
| hsa-miR-19a | -        | TARSL2   | TARSL2   |
| hsa-miR-19a | TBC1D25  | TBC1D25  | -        |
| hsa-miR-19a | TBC1D8   | TBC1D8   | -        |
| hsa-miR-19a | -        | TBCA     | TBCA     |
| hsa-miR-19a | TBR1     | TBR1     | -        |
| hsa-miR-19a | TBX18    | TBX18    | -        |
| hsa-miR-19a | -        | TCEA1    | TCEA1    |
| hsa-miR-19a | TCEB3    | TCEB3    | -        |
| hsa-miR-19a | TESK2    | TESK2    | -        |
| hsa-miR-19a | TET3     | TET3     | -        |
| hsa-miR-19a | -        | TFB1M    | TFB1M    |
| hsa-miR-19a | TFCP2L1  | TFCP2L1  | -        |
| hsa-miR-19a | TFDP2    | -        | TFDP2    |
| hsa-miR-19a | TFPI     | TFPI     | -        |
| hsa-miR-19a | TGFBR2   | TGFBR2   | -        |
| hsa-miR-19a | -        | TGFBR3   | TGFBR3   |
| hsa-miR-19a | TGM2     | TGM2     | -        |
| hsa-miR-19a | -        | THEG     | THEG     |
| hsa-miR-19a | THSD7A   | THSD7A   | -        |
| hsa-miR-19a | TIA1     | TIA1     | -        |
| hsa-miR-19a | -        | TLE1     | TLE1     |
| hsa-miR-19a | -        | TLR5     | TLR5     |
| hsa-miR-19a | TMBIM6   | TMBIM6   | -        |
| hsa-miR-19a | TMEM167B | TMEM167B | -        |
| hsa-miR-19a | -        | TMEM182  | TMEM182  |
| hsa-miR-19a | TMEM196  | TMEM196  | -        |
| hsa-miR-19a | TMEM25   | TMEM25   | -        |
| hsa-miR-19a | -        | TMEM45B  | TMEM45B  |
| hsa-miR-19a | TMEM47   | TMEM47   | -        |
| hsa-miR-19a | TMEM63B  | TMEM63B  | -        |
| hsa-miR-19a | TMEM64   | TMEM64   | -        |
| hsa-miR-19a | TMEM9B   | TMEM9B   | -        |
| hsa-miR-19a | -        | TMPRSS12 | TMPRSS12 |
| hsa-miR-19a | TNFAIP3  | TNFAIP3  | -        |
| hsa-miR-19a | TNFRSF1B | TNFRSF1B | -        |
| hsa-miR-19a | TNKS     | TNKS     | -        |
| hsa-miR-19a | TNPO2    | TNPO2    | -        |
| hsa-miR-19a | TNRC6A   | TNRC6A   | -        |
| hsa-miR-19a | TNRC6C   | TNRC6C   | -        |
| hsa-miR-19a | -        | TNS1     | TNS1     |
| hsa-miR-19a | TOM1L1   | TOM1L1   | -        |
| hsa-miR-19a | TOM1L2   | TOM1L2   | -        |
| hsa-miR-19a | -        | TOMM34   | TOMM34   |
| hsa-miR-19a | TPRG1L   | TPRG1L   | -        |
| hsa-miR-19a | TRAK2    | TRAK2    | -        |
| hsa-miR-19a | TRERF1   | TRERF1   | -        |
| hsa-miR-19a | TRIM2    | TRIM2    | -        |
| hsa-miR-19a | TRIM23   | TRIM23   | -        |
| hsa-miR-19a | TRIM33   | TRIM33   | -        |
| hsa-miR-19a | TRIM37   | TRIM37   | -        |
| hsa-miR-19a | -        | TRO      | TRO      |

|             |         |         |        |
|-------------|---------|---------|--------|
| hsa-miR-19a | TRPC3   | TRPC3   | -      |
| hsa-miR-19a | TRPM6   | TRPM6   | -      |
| hsa-miR-19a | -       | TRPM8   | TRPM8  |
| hsa-miR-19a | TRPS1   | TRPS1   | -      |
| hsa-miR-19a | TSC1    | TSC1    | -      |
| hsa-miR-19a | TSHZ3   | TSHZ3   | -      |
| hsa-miR-19a | TSPAN18 | TSPAN18 | -      |
| hsa-miR-19a | -       | TSPAN6  | TSPAN6 |
| hsa-miR-19a | TTC9    | TTC9    | -      |
| hsa-miR-19a | TUB     | TUB     | -      |
| hsa-miR-19a | -       | TUSC2   | TUSC2  |
| hsa-miR-19a | -       | TUSC3   | TUSC3  |
| hsa-miR-19a | TXLNA   | TXLNA   | -      |
| hsa-miR-19a | TXLNG   | TXLNG   | -      |
| hsa-miR-19a | UBE2A   | UBE2A   | -      |
| hsa-miR-19a | UBE2D2  | UBE2D2  | -      |
| hsa-miR-19a | UBFD1   | UBFD1   | -      |
| hsa-miR-19a | UBL3    | UBL3    | -      |
| hsa-miR-19a | UBN1    | UBN1    | -      |
| hsa-miR-19a | UBXN2B  | UBXN2B  | -      |
| hsa-miR-19a | UCP3    | UCP3    | -      |
| hsa-miR-19a | -       | UFD1L   | UFD1L  |
| hsa-miR-19a | UHMK1   | UHMK1   | -      |
| hsa-miR-19a | -       | UHRF2   | UHRF2  |
| hsa-miR-19a | ULK2    | ULK2    | -      |
| hsa-miR-19a | UNC13A  | UNC13A  | -      |
| hsa-miR-19a | USP12   | USP12   | -      |
| hsa-miR-19a | USP13   | USP13   | -      |
| hsa-miR-19a | USP33   | USP33   | -      |
| hsa-miR-19a | USP37   | USP37   | -      |
| hsa-miR-19a | UTY     | UTY     | -      |
| hsa-miR-19a | VAMP3   | VAMP3   | -      |
| hsa-miR-19a | VAT1L   | VAT1L   | -      |
| hsa-miR-19a | VAV2    | VAV2    | -      |
| hsa-miR-19a | VCPIP1  | VCPIP1  | -      |
| hsa-miR-19a | VGLL4   | VGLL4   | -      |
| hsa-miR-19a | -       | VPS13A  | VPS13A |
| hsa-miR-19a | VPS13D  | VPS13D  | -      |
| hsa-miR-19a | -       | VRK1    | VRK1   |
| hsa-miR-19a | VSIG10  | VSIG10  | -      |
| hsa-miR-19a | VSIG10L | VSIG10L | -      |
| hsa-miR-19a | VSTM2B  | VSTM2B  | -      |
| hsa-miR-19a | VSTM2L  | VSTM2L  | -      |
| hsa-miR-19a | VTI1A   | VTI1A   | -      |
| hsa-miR-19a | -       | VWA2    | VWA2   |
| hsa-miR-19a | WAC     | WAC     | -      |
| hsa-miR-19a | WBP2    | WBP2    | -      |
| hsa-miR-19a | -       | WBP4    | WBP4   |
| hsa-miR-19a | WDFY3   | WDFY3   | -      |
| hsa-miR-19a | WDR1    | WDR1    | -      |
| hsa-miR-19a | WDR26   | WDR26   | -      |

|             |         |          |          |
|-------------|---------|----------|----------|
| hsa-miR-19a | WDR44   | WDR44    | -        |
| hsa-miR-19a | WDR45L  | WDR45L   | -        |
| hsa-miR-19a | WHSC1L1 | WHSC1L1  | -        |
| hsa-miR-19a | WNK1    | WNK1     | -        |
| hsa-miR-19a | WNT10A  | WNT10A   | -        |
| hsa-miR-19a | -       | WNT2B    | WNT2B    |
| hsa-miR-19a | WWP1    | WWP1     | -        |
| hsa-miR-19a | -       | XG       | XG       |
| hsa-miR-19a | XYLT1   | XYLT1    | -        |
| hsa-miR-19a | YAF2    | YAF2     | -        |
| hsa-miR-19a | YTHDF2  | YTHDF2   | -        |
| hsa-miR-19a | ZAK     | ZAK      | -        |
| hsa-miR-19a | -       | ZBED5    | ZBED5    |
| hsa-miR-19a | ZBTB11  | ZBTB11   | -        |
| hsa-miR-19a | ZBTB4   | ZBTB4    | -        |
| hsa-miR-19a | ZBTB47  | ZBTB47   | -        |
| hsa-miR-19a | ZBTB7B  | ZBTB7B   | -        |
| hsa-miR-19a | -       | ZC3HAV1L | ZC3HAV1L |
| hsa-miR-19a | -       | ZCCHC7   | ZCCHC7   |
| hsa-miR-19a | ZDHHC18 | ZDHHC18  | -        |
| hsa-miR-19a | ZDHHC23 | ZDHHC23  | -        |
| hsa-miR-19a | ZEB2    | ZEB2     | -        |
| hsa-miR-19a | ZER1    | ZER1     | -        |
| hsa-miR-19a | ZFAND6  | ZFAND6   | -        |
| hsa-miR-19a | ZFP161  | ZFP161   | -        |
| hsa-miR-19a | ZFP91   | ZFP91    | -        |
| hsa-miR-19a | ZFYVE26 | ZFYVE26  | -        |
| hsa-miR-19a | -       | ZIC5     | ZIC5     |
| hsa-miR-19a | ZMAT3   | ZMAT3    | -        |
| hsa-miR-19a | ZMYM2   | ZMYM2    | -        |
| hsa-miR-19a | ZNF238  | ZNF238   | -        |
| hsa-miR-19a | ZNF3    | ZNF3     | -        |
| hsa-miR-19a | -       | ZNF322B  | ZNF322B  |
| hsa-miR-19a | ZNF367  | ZNF367   | -        |
| hsa-miR-19a | ZNF469  | ZNF469   | -        |
| hsa-miR-19a | ZNF516  | ZNF516   | -        |
| hsa-miR-19a | ZNF518A | ZNF518A  | -        |
| hsa-miR-19a | ZNF521  | ZNF521   | -        |
| hsa-miR-19a | ZNF654  | ZNF654   | -        |
| hsa-miR-19a | -       | ZNF682   | ZNF682   |
| hsa-miR-19a | ZNF704  | -        | ZNF704   |
| hsa-miR-19a | ZNF710  | ZNF710   | -        |
| hsa-miR-19a | ZNF711  | ZNF711   | -        |
| hsa-miR-19a | -       | ZNF804A  | ZNF804A  |
| hsa-miR-19a | ZNF831  | ZNF831   | -        |
| hsa-miR-19a | ZNF862  | ZNF862   | -        |
| hsa-miR-19a | ZNRF3   | ZNRF3    | -        |
| hsa-miR-19a | ZPLD1   | ZPLD1    | -        |
| hsa-miR-19b | ABCA1   | ABCA1    | -        |
| hsa-miR-19b | -       | ABCB1    | ABCB1    |
| hsa-miR-19b | -       | ABCB7    | ABCB7    |

|             |           |           |          |
|-------------|-----------|-----------|----------|
| hsa-miR-19b | -         | ABCC3     | ABCC3    |
| hsa-miR-19b | ABCE1     | ABCE1     | -        |
| hsa-miR-19b | ABR       | ABR       | -        |
| hsa-miR-19b | ACADSB    | ACADSB    | -        |
| hsa-miR-19b | ACBD5     | ACBD5     | -        |
| hsa-miR-19b | -         | ACOX3     | ACOX3    |
| hsa-miR-19b | ACSL1     | ACSL1     | -        |
| hsa-miR-19b | ACSL3     | ACSL3     | -        |
| hsa-miR-19b | ACSL4     | ACSL4     | -        |
| hsa-miR-19b | -         | ACTL6A    | ACTL6A   |
| hsa-miR-19b | ADAM12    | ADAM12    | -        |
| hsa-miR-19b | ADAMTS18  | ADAMTS18  | -        |
| hsa-miR-19b | -         | ADAMTS20  | ADAMTS20 |
| hsa-miR-19b | ADAMTSL3  | ADAMTSL3  | -        |
| hsa-miR-19b | ADCY7     | ADCY7     | -        |
| hsa-miR-19b | ADIPOR2   | ADIPOR2   | -        |
| hsa-miR-19b | ADNP      | ADNP      | -        |
| hsa-miR-19b | ADRB1     | ADRB1     | -        |
| hsa-miR-19b | ADSS      | ADSS      | -        |
| hsa-miR-19b | AFF1      | AFF1      | -        |
| hsa-miR-19b | AGPAT5    | AGPAT5    | -        |
| hsa-miR-19b | AKAP1     | AKAP1     | -        |
| hsa-miR-19b | AKAP7     | AKAP7     | -        |
| hsa-miR-19b | ALG2      | ALG2      | -        |
| hsa-miR-19b | -         | ALPK1     | ALPK1    |
| hsa-miR-19b | AMMECR1L  | AMMECR1L  | -        |
| hsa-miR-19b | ANKIB1    | ANKIB1    | -        |
| hsa-miR-19b | -         | ANKRD10   | ANKRD10  |
| hsa-miR-19b | ANKRD12   | ANKRD12   | -        |
| hsa-miR-19b | ANKRD13C  | ANKRD13C  | -        |
| hsa-miR-19b | ANKRD34A  | ANKRD34A  | -        |
| hsa-miR-19b | ANO1      | ANO1      | -        |
| hsa-miR-19b | ANO5      | ANO5      | -        |
| hsa-miR-19b | ANTXR1    | ANTXR1    | -        |
| hsa-miR-19b | -         | AP1G2     | AP1G2    |
| hsa-miR-19b | APAF1     | APAF1     | -        |
| hsa-miR-19b | APOLD1    | APOLD1    | -        |
| hsa-miR-19b | APPL1     | APPL1     | -        |
| hsa-miR-19b | ARAP2     | ARAP2     | -        |
| hsa-miR-19b | ARC       | ARC       | -        |
| hsa-miR-19b | ARFGEF1   | ARFGEF1   | -        |
| hsa-miR-19b | ARFIP1    | ARFIP1    | -        |
| hsa-miR-19b | ARHGAP1   | ARHGAP1   | -        |
| hsa-miR-19b | ARHGAP11A | ARHGAP11A | -        |
| hsa-miR-19b | ARHGAP12  | ARHGAP12  | -        |
| hsa-miR-19b | -         | ARHGAP21  | ARHGAP21 |
| hsa-miR-19b | ARHGAP5   | ARHGAP5   | -        |
| hsa-miR-19b | ARHGEF12  | ARHGEF12  | -        |
| hsa-miR-19b | -         | ARHGEF5   | ARHGEF5  |
| hsa-miR-19b | ARID4B    | ARID4B    | -        |
| hsa-miR-19b | ARIH2     | ARIH2     | -        |

|             |           |           |          |
|-------------|-----------|-----------|----------|
| hsa-miR-19b | ARPP19    | ARPP19    | -        |
| hsa-miR-19b | ARRDC3    | ARRDC3    | -        |
| hsa-miR-19b | ARRDC4    | ARRDC4    | -        |
| hsa-miR-19b | ASAP2     | ASAP2     | -        |
| hsa-miR-19b | ASCL1     | ASCL1     | -        |
| hsa-miR-19b | -         | ASPM      | ASPM     |
| hsa-miR-19b | ASXL2     | ASXL2     | -        |
| hsa-miR-19b | -         | ATF7IP2   | ATF7IP2  |
| hsa-miR-19b | ATG16L1   | ATG16L1   | -        |
| hsa-miR-19b | ATL2      | ATL2      | -        |
| hsa-miR-19b | ATP11A    | ATP11A    | -        |
| hsa-miR-19b | -         | ATP12A    | ATP12A   |
| hsa-miR-19b | ATP1A2    | ATP1A2    | -        |
| hsa-miR-19b | ATP2B2    | ATP2B2    | -        |
| hsa-miR-19b | ATP2C1    | ATP2C1    | -        |
| hsa-miR-19b | -         | ATP6V0E1  | ATP6V0E1 |
| hsa-miR-19b | ATP6V1B2  | ATP6V1B2  | -        |
| hsa-miR-19b | ATRX      | ATRX      | -        |
| hsa-miR-19b | ATXN1     | ATXN1     | -        |
| hsa-miR-19b | ATXN7     | ATXN7     | -        |
| hsa-miR-19b | ATXN7L1   | ATXN7L1   | -        |
| hsa-miR-19b | B4GALT5   | B4GALT5   | -        |
| hsa-miR-19b | BACE1     | BACE1     | -        |
| hsa-miR-19b | -         | BANK1     | BANK1    |
| hsa-miR-19b | -         | BARD1     | BARD1    |
| hsa-miR-19b | BCAR3     | BCAR3     | -        |
| hsa-miR-19b | BCAT1     | BCAT1     | -        |
| hsa-miR-19b | BCL2L11   | BCL2L11   | -        |
| hsa-miR-19b | -         | BCL2L14   | BCL2L14  |
| hsa-miR-19b | BCL7A     | BCL7A     | -        |
| hsa-miR-19b | -         | BCMO1     | BCMO1    |
| hsa-miR-19b | BEND3     | BEND3     | -        |
| hsa-miR-19b | BEND4     | BEND4     | -        |
| hsa-miR-19b | BLCAP     | BLCAP     | -        |
| hsa-miR-19b | BMP3      | BMP3      | -        |
| hsa-miR-19b | BMPR2     | BMPR2     | -        |
| hsa-miR-19b | BPTF      | BPTF      | -        |
| hsa-miR-19b | -         | BRE       | BRE      |
| hsa-miR-19b | BRWD1     | BRWD1     | -        |
| hsa-miR-19b | BTBD7     | BTBD7     | -        |
| hsa-miR-19b | BTF3L4    | BTF3L4    | -        |
| hsa-miR-19b | BZRAP1    | BZRAP1    | -        |
| hsa-miR-19b | C10orf140 | C10orf140 | -        |
| hsa-miR-19b | C10orf26  | C10orf26  | -        |
| hsa-miR-19b | C10orf46  | C10orf46  | -        |
| hsa-miR-19b | -         | C10orf71  | C10orf71 |
| hsa-miR-19b | C11orf30  | C11orf30  | -        |
| hsa-miR-19b | C12orf12  | C12orf12  | -        |
| hsa-miR-19b | -         | C12orf48  | C12orf48 |
| hsa-miR-19b | C12orf53  | C12orf53  | -        |
| hsa-miR-19b | -         | C13orf18  | C13orf18 |

|             |           |           |          |
|-------------|-----------|-----------|----------|
| hsa-miR-19b | -         | C13orf33  | C13orf33 |
| hsa-miR-19b | C14orf129 | C14orf129 | -        |
| hsa-miR-19b | C14orf147 | C14orf147 | -        |
| hsa-miR-19b | C16orf52  | C16orf52  | -        |
| hsa-miR-19b | C16orf70  | C16orf70  | -        |
| hsa-miR-19b | C17orf80  | C17orf80  | -        |
| hsa-miR-19b | -         | C17orf86  | C17orf86 |
| hsa-miR-19b | -         | C19orf52  | C19orf52 |
| hsa-miR-19b | C20orf194 | C20orf194 | -        |
| hsa-miR-19b | C21orf91  | C21orf91  | -        |
| hsa-miR-19b | -         | C2orf15   | C2orf15  |
| hsa-miR-19b | -         | C2orf43   | C2orf43  |
| hsa-miR-19b | C3orf64   | C3orf64   | -        |
| hsa-miR-19b | C3orf70   | C3orf70   | -        |
| hsa-miR-19b | -         | C4orf19   | C4orf19  |
| hsa-miR-19b | -         | C5        | C5       |
| hsa-miR-19b | C5orf30   | C5orf30   | -        |
| hsa-miR-19b | C5orf41   | C5orf41   | -        |
| hsa-miR-19b | -         | C6orf142  | C6orf142 |
| hsa-miR-19b | C6orf222  | C6orf222  | -        |
| hsa-miR-19b | C7orf60   | C7orf60   | -        |
| hsa-miR-19b | C8orf4    | C8orf4    | -        |
| hsa-miR-19b | -         | C9orf103  | C9orf103 |
| hsa-miR-19b | C9orf5    | C9orf5    | -        |
| hsa-miR-19b | C9orf69   | C9orf69   | -        |
| hsa-miR-19b | -         | CA5B      | CA5B     |
| hsa-miR-19b | CAB39     | CAB39     | -        |
| hsa-miR-19b | -         | CABP7     | CABP7    |
| hsa-miR-19b | CADM4     | CADM4     | -        |
| hsa-miR-19b | CALD1     | CALD1     | -        |
| hsa-miR-19b | CALM1     | CALM1     | -        |
| hsa-miR-19b | -         | CAMK2N1   | CAMK2N1  |
| hsa-miR-19b | CAMSAP1   | CAMSAP1   | -        |
| hsa-miR-19b | CAMSAP1L1 | CAMSAP1L1 | -        |
| hsa-miR-19b | CAND1     | CAND1     | -        |
| hsa-miR-19b | -         | CAPRIN2   | CAPRIN2  |
| hsa-miR-19b | CASK      | CASK      | -        |
| hsa-miR-19b | -         | CASP8     | CASP8    |
| hsa-miR-19b | CAST      | CAST      | -        |
| hsa-miR-19b | CASZ1     | CASZ1     | -        |
| hsa-miR-19b | CBFA2T2   | CBFA2T2   | -        |
| hsa-miR-19b | CBFB      | CBFB      | -        |
| hsa-miR-19b | CBLN2     | CBLN2     | -        |
| hsa-miR-19b | CBX1      | CBX1      | -        |
| hsa-miR-19b | CBX7      | CBX7      | -        |
| hsa-miR-19b | CCDC152   | CCDC152   | -        |
| hsa-miR-19b | CCDC47    | CCDC47    | -        |
| hsa-miR-19b | CCDC6     | CCDC6     | -        |
| hsa-miR-19b | CCDC88A   | CCDC88A   | -        |
| hsa-miR-19b | -         | CCL2      | CCL2     |
| hsa-miR-19b | CCND1     | CCND1     | -        |



|             |          |          |         |
|-------------|----------|----------|---------|
| hsa-miR-19b | CCND2    | CCND2    | -       |
| hsa-miR-19b | CCNT2    | CCNT2    | -       |
| hsa-miR-19b | -        | CCPG1    | CCPG1   |
| hsa-miR-19b | CD164    | CD164    | -       |
| hsa-miR-19b | -        | CD207    | CD207   |
| hsa-miR-19b | -        | CD69     | CD69    |
| hsa-miR-19b | -        | CD72     | CD72    |
| hsa-miR-19b | CDC42BPA | CDC42BPA | -       |
| hsa-miR-19b | -        | CDH11    | CDH11   |
| hsa-miR-19b | -        | CDH2     | CDH2    |
| hsa-miR-19b | CDK13    | CDK13    | -       |
| hsa-miR-19b | CDK19    | CDK19    | -       |
| hsa-miR-19b | -        | CDK2AP1  | CDK2AP1 |
| hsa-miR-19b | CEP170   | CEP170   | -       |
| hsa-miR-19b | -        | CEP192   | CEP192  |
| hsa-miR-19b | CEP350   | CEP350   | -       |
| hsa-miR-19b | CEP55    | CEP55    | -       |
| hsa-miR-19b | CGN      | CGN      | -       |
| hsa-miR-19b | CHD2     | CHD2     | -       |
| hsa-miR-19b | CHD5     | -        | CHD5    |
| hsa-miR-19b | CHIC1    | CHIC1    | -       |
| hsa-miR-19b | -        | CHIC2    | CHIC2   |
| hsa-miR-19b | CISD3    | CISD3    | -       |
| hsa-miR-19b | CIT      | CIT      | -       |
| hsa-miR-19b | -        | CKAP5    | CKAP5   |
| hsa-miR-19b | CLCN6    | CLCN6    | -       |
| hsa-miR-19b | -        | CLDN16   | CLDN16  |
| hsa-miR-19b | CLIP4    | CLIP4    | -       |
| hsa-miR-19b | CLOCK    | CLOCK    | -       |
| hsa-miR-19b | CLTC     | CLTC     | -       |
| hsa-miR-19b | -        | CLU      | CLU     |
| hsa-miR-19b | -        | CLUL1    | CLUL1   |
| hsa-miR-19b | -        | CMYA5    | CMYA5   |
| hsa-miR-19b | CNOT6    | CNOT6    | -       |
| hsa-miR-19b | CNOT6L   | CNOT6L   | -       |
| hsa-miR-19b | CNOT7    | CNOT7    | -       |
| hsa-miR-19b | CNR1     | CNR1     | -       |
| hsa-miR-19b | -        | COL16A1  | COL16A1 |
| hsa-miR-19b | COL19A1  | COL19A1  | -       |
| hsa-miR-19b | -        | COPS4    | COPS4   |
| hsa-miR-19b | COQ10B   | COQ10B   | -       |
| hsa-miR-19b | COX15    | COX15    | -       |
| hsa-miR-19b | -        | COX8C    | COX8C   |
| hsa-miR-19b | CPD      | CPD      | -       |
| hsa-miR-19b | CPEB1    | CPEB1    | -       |
| hsa-miR-19b | CPEB3    | CPEB3    | -       |
| hsa-miR-19b | CPEB4    | CPEB4    | -       |
| hsa-miR-19b | -        | CRABP1   | CRABP1  |
| hsa-miR-19b | CREBL2   | CREBL2   | -       |
| hsa-miR-19b | CS       | CS       | -       |
| hsa-miR-19b | -        | CSE1L    | CSE1L   |

|             |          |          |         |
|-------------|----------|----------|---------|
| hsa-miR-19b | -        | CSF1     | CSF1    |
| hsa-miR-19b | CSF2RB   | CSF2RB   | -       |
| hsa-miR-19b | CSMD1    | CSMD1    | -       |
| hsa-miR-19b | CSNK1G1  | CSNK1G1  | -       |
| hsa-miR-19b | CSPP1    | CSPP1    | -       |
| hsa-miR-19b | CSRNP3   | CSRNP3   | -       |
| hsa-miR-19b | CTGF     | CTGF     | -       |
| hsa-miR-19b | -        | CTR9     | CTR9    |
| hsa-miR-19b | CUX1     | CUX1     | -       |
| hsa-miR-19b | CXCL12   | CXCL12   | -       |
| hsa-miR-19b | CYB561D1 | CYB561D1 | -       |
| hsa-miR-19b | CYLD     | CYLD     | -       |
| hsa-miR-19b | DAAM1    | DAAM1    | -       |
| hsa-miR-19b | -        | DAD1     | DAD1    |
| hsa-miR-19b | DAG1     | DAG1     | -       |
| hsa-miR-19b | DBN1     | DBN1     | -       |
| hsa-miR-19b | DCAF7    | DCAF7    | -       |
| hsa-miR-19b | DCAF8    | DCAF8    | -       |
| hsa-miR-19b | DCBLD2   | DCBLD2   | -       |
| hsa-miR-19b | DCUN1D3  | DCUN1D3  | -       |
| hsa-miR-19b | -        | DDX26B   | DDX26B  |
| hsa-miR-19b | DDX3X    | DDX3X    | -       |
| hsa-miR-19b | DDX3Y    | DDX3Y    | -       |
| hsa-miR-19b | DDX6     | DDX6     | -       |
| hsa-miR-19b | DENND1A  | DENND1A  | -       |
| hsa-miR-19b | -        | DENND1B  | DENND1B |
| hsa-miR-19b | -        | DET1     | DET1    |
| hsa-miR-19b | DGKE     | DGKE     | -       |
| hsa-miR-19b | DHX40    | DHX40    | -       |
| hsa-miR-19b | DICER1   | DICER1   | -       |
| hsa-miR-19b | DIP2A    | DIP2A    | -       |
| hsa-miR-19b | DIRAS2   | DIRAS2   | -       |
| hsa-miR-19b | DKK3     | DKK3     | -       |
| hsa-miR-19b | DLC1     | DLC1     | -       |
| hsa-miR-19b | DLG5     | DLG5     | -       |
| hsa-miR-19b | DLX1     | DLX1     | -       |
| hsa-miR-19b | DLX3     | DLX3     | -       |
| hsa-miR-19b | DMXL2    | DMXL2    | -       |
| hsa-miR-19b | DNAJB1   | DNAJB1   | -       |
| hsa-miR-19b | -        | DNAJC1   | DNAJC1  |
| hsa-miR-19b | DNAJC16  | DNAJC16  | -       |
| hsa-miR-19b | -        | DNAJC3   | DNAJC3  |
| hsa-miR-19b | DNAL1    | DNAL1    | -       |
| hsa-miR-19b | -        | DNM1L    | DNM1L   |
| hsa-miR-19b | -        | DNPEP    | DNPEP   |
| hsa-miR-19b | DOCK3    | DOCK3    | -       |
| hsa-miR-19b | DOCK4    | DOCK4    | -       |
| hsa-miR-19b | DOCK5    | DOCK5    | -       |
| hsa-miR-19b | DPYSL5   | DPYSL5   | -       |
| hsa-miR-19b | DSCAM    | DSCAM    | -       |
| hsa-miR-19b | DTNA     | DTNA     | -       |

|             |          |          |          |
|-------------|----------|----------|----------|
| hsa-miR-19b | DUSP7    | DUSP7    | -        |
| hsa-miR-19b | -        | DUT      | DUT      |
| hsa-miR-19b | -        | DYNC1LI1 | DYNC1LI1 |
| hsa-miR-19b | DYNC1LI2 | DYNC1LI2 | -        |
| hsa-miR-19b | -        | DYNLL2   | DYNLL2   |
| hsa-miR-19b | EBF1     | EBF1     | -        |
| hsa-miR-19b | EDARADD  | EDARADD  | -        |
| hsa-miR-19b | EDNRB    | EDNRB    | -        |
| hsa-miR-19b | EFNB2    | EFNB2    | -        |
| hsa-miR-19b | EFR3A    | EFR3A    | -        |
| hsa-miR-19b | EGR3     | EGR3     | -        |
| hsa-miR-19b | -        | EGR4     | EGR4     |
| hsa-miR-19b | EIF2C1   | EIF2C1   | -        |
| hsa-miR-19b | EIF4A2   | EIF4A2   | -        |
| hsa-miR-19b | EIF4G2   | EIF4G2   | -        |
| hsa-miR-19b | ELAVL1   | ELAVL1   | -        |
| hsa-miR-19b | ELK4     | -        | ELK4     |
| hsa-miR-19b | ELL2     | ELL2     | -        |
| hsa-miR-19b | ELMOD2   | ELMOD2   | -        |
| hsa-miR-19b | ELOVL5   | ELOVL5   | -        |
| hsa-miR-19b | EMX2     | EMX2     | -        |
| hsa-miR-19b | ENC1     | ENC1     | -        |
| hsa-miR-19b | -        | ENPP2    | ENPP2    |
| hsa-miR-19b | ENPP4    | ENPP4    | -        |
| hsa-miR-19b | EPB41L5  | EPB41L5  | -        |
| hsa-miR-19b | EPC2     | EPC2     | -        |
| hsa-miR-19b | EPHB3    | EPHB3    | -        |
| hsa-miR-19b | EPHX4    | EPHX4    | -        |
| hsa-miR-19b | EPN2     | EPN2     | -        |
| hsa-miR-19b | EPS15    | EPS15    | -        |
| hsa-miR-19b | ERBB3    | ERBB3    | -        |
| hsa-miR-19b | EREG     | EREG     | -        |
| hsa-miR-19b | -        | ERICH1   | ERICH1   |
| hsa-miR-19b | -        | ESAM     | ESAM     |
| hsa-miR-19b | ESR1     | ESR1     | -        |
| hsa-miR-19b | ESRP2    | ESRP2    | -        |
| hsa-miR-19b | ESYT1    | ESYT1    | -        |
| hsa-miR-19b | ETV1     | ETV1     | -        |
| hsa-miR-19b | -        | EVC2     | EVC2     |
| hsa-miR-19b | EVI5     | EVI5     | -        |
| hsa-miR-19b | EVI5L    | EVI5L    | -        |
| hsa-miR-19b | EXOC5    | EXOC5    | -        |
| hsa-miR-19b | -        | EXOSC7   | EXOSC7   |
| hsa-miR-19b | F3       | F3       | -        |
| hsa-miR-19b | FAM108C1 | FAM108C1 | -        |
| hsa-miR-19b | FAM116A  | FAM116A  | -        |
| hsa-miR-19b | -        | FAM129C  | FAM129C  |
| hsa-miR-19b | FAM160A1 | FAM160A1 | -        |
| hsa-miR-19b | FAM168A  | FAM168A  | -        |
| hsa-miR-19b | FAM177B  | FAM177B  | -        |
| hsa-miR-19b | FAM190B  | FAM190B  | -        |

|             |           |           |        |
|-------------|-----------|-----------|--------|
| hsa-miR-19b | FAM196A   | FAM196A   | -      |
| hsa-miR-19b | FAM46A    | FAM46A    | -      |
| hsa-miR-19b | FAM73B    | FAM73B    | -      |
| hsa-miR-19b | FAM76B    | FAM76B    | -      |
| hsa-miR-19b | FBXO10    | FBXO10    | -      |
| hsa-miR-19b | -         | FBXO16    | FBXO16 |
| hsa-miR-19b | FBXO28    | FBXO28    | -      |
| hsa-miR-19b | FBXO48    | FBXO48    | -      |
| hsa-miR-19b | FBXW11    | FBXW11    | -      |
| hsa-miR-19b | -         | FCAR      | FCAR   |
| hsa-miR-19b | FEM1C     | FEM1C     | -      |
| hsa-miR-19b | FIBIN     | FIBIN     | -      |
| hsa-miR-19b | -         | FMR1      | FMR1   |
| hsa-miR-19b | FNDC3A    | FNDC3A    | -      |
| hsa-miR-19b | FNDC3B    | FNDC3B    | -      |
| hsa-miR-19b | FOSL1     | FOSL1     | -      |
| hsa-miR-19b | -         | FOXD4     | FOXD4  |
| hsa-miR-19b | FOXP1     | FOXP1     | -      |
| hsa-miR-19b | FRAS1     | FRAS1     | -      |
| hsa-miR-19b | FRK       | FRK       | -      |
| hsa-miR-19b | FRMD4A    | FRMD4A    | -      |
| hsa-miR-19b | FRMD6     | FRMD6     | -      |
| hsa-miR-19b | -         | FUNDC1    | FUNDC1 |
| hsa-miR-19b | FURIN     | FURIN     | -      |
| hsa-miR-19b | -         | FUT2      | FUT2   |
| hsa-miR-19b | FUT4      | FUT4      | -      |
| hsa-miR-19b | FXR1      | FXR1      | -      |
| hsa-miR-19b | FZD6      | FZD6      | -      |
| hsa-miR-19b | -         | G0S2      | G0S2   |
| hsa-miR-19b | G3BP2     | G3BP2     | -      |
| hsa-miR-19b | GABARAPL1 | GABARAPL1 | -      |
| hsa-miR-19b | -         | GATA6     | GATA6  |
| hsa-miR-19b | GATAD2B   | GATAD2B   | -      |
| hsa-miR-19b | GATSL3    | GATSL3    | -      |
| hsa-miR-19b | GCC2      | GCC2      | -      |
| hsa-miR-19b | GDA       | GDA       | -      |
| hsa-miR-19b | -         | GDPD4     | GDPD4  |
| hsa-miR-19b | GFPT1     | GFPT1     | -      |
| hsa-miR-19b | GGA1      | GGA1      | -      |
| hsa-miR-19b | GIGYF1    | GIGYF1    | -      |
| hsa-miR-19b | GIT2      | GIT2      | -      |
| hsa-miR-19b | GJA1      | GJA1      | -      |
| hsa-miR-19b | GLRA3     | GLRA3     | -      |
| hsa-miR-19b | GMFB      | GMFB      | -      |
| hsa-miR-19b | GPBP1     | GPBP1     | -      |
| hsa-miR-19b | GPCPD1    | GPCPD1    | -      |
| hsa-miR-19b | GPR153    | GPR153    | -      |
| hsa-miR-19b | -         | GPR39     | GPR39  |
| hsa-miR-19b | GRB10     | GRB10     | -      |
| hsa-miR-19b | GRIN2A    | GRIN2A    | -      |
| hsa-miR-19b | GRSF1     | GRSF1     | -      |

|             |          |          |          |
|-------------|----------|----------|----------|
| hsa-miR-19b | -        | GTF2IRD1 | GTF2IRD1 |
| hsa-miR-19b | GULP1    | GULP1    | -        |
| hsa-miR-19b | -        | HADHA    | HADHA    |
| hsa-miR-19b | -        | HADHB    | HADHB    |
| hsa-miR-19b | HBP1     | HBP1     | -        |
| hsa-miR-19b | -        | HBS1L    | HBS1L    |
| hsa-miR-19b | HCFC2    | HCFC2    | -        |
| hsa-miR-19b | HDAC4    | HDAC4    | -        |
| hsa-miR-19b | HDAC7    | HDAC7    | -        |
| hsa-miR-19b | HDLBP    | HDLBP    | -        |
| hsa-miR-19b | HECTD3   | HECTD3   | -        |
| hsa-miR-19b | HECW2    | HECW2    | -        |
| hsa-miR-19b | HIC1     | HIC1     | -        |
| hsa-miR-19b | HIPK1    | HIPK1    | -        |
| hsa-miR-19b | -        | HIVEP2   | HIVEP2   |
| hsa-miR-19b | HLF      | HLF      | -        |
| hsa-miR-19b | HNRNPA1  | HNRNPA1  | -        |
| hsa-miR-19b | HNRNPD   | HNRNPD   | -        |
| hsa-miR-19b | HNRNPF   | HNRNPF   | -        |
| hsa-miR-19b | HNRNPU   | HNRNPU   | -        |
| hsa-miR-19b | HNRNPUL1 | HNRNPUL1 | -        |
| hsa-miR-19b | HNRNPUL2 | HNRNPUL2 | -        |
| hsa-miR-19b | HOMER1   | HOMER1   | -        |
| hsa-miR-19b | HOXA9    | HOXA9    | -        |
| hsa-miR-19b | HS2ST1   | HS2ST1   | -        |
| hsa-miR-19b | -        | HSD17B11 | HSD17B11 |
| hsa-miR-19b | -        | HSP90B1  | HSP90B1  |
| hsa-miR-19b | -        | HSPBAP1  | HSPBAP1  |
| hsa-miR-19b | HSPC159  | HSPC159  | -        |
| hsa-miR-19b | ICA1L    | ICA1L    | -        |
| hsa-miR-19b | ID2      | ID2      | -        |
| hsa-miR-19b | -        | IFNA2    | IFNA2    |
| hsa-miR-19b | IGDCC4   | IGDCC4   | -        |
| hsa-miR-19b | IGF1     | IGF1     | -        |
| hsa-miR-19b | IGF2R    | IGF2R    | -        |
| hsa-miR-19b | IGFBP3   | IGFBP3   | -        |
| hsa-miR-19b | IGSF3    | IGSF3    | -        |
| hsa-miR-19b | -        | IL18R1   | IL18R1   |
| hsa-miR-19b | IL1R1    | IL1R1    | -        |
| hsa-miR-19b | -        | IL26     | IL26     |
| hsa-miR-19b | ILF3     | ILF3     | -        |
| hsa-miR-19b | INHBB    | INHBB    | -        |
| hsa-miR-19b | INO80    | INO80    | -        |
| hsa-miR-19b | INSIG1   | INSIG1   | -        |
| hsa-miR-19b | INSIG2   | INSIG2   | -        |
| hsa-miR-19b | ITFG3    | ITFG3    | -        |
| hsa-miR-19b | ITGA2    | ITGA2    | -        |
| hsa-miR-19b | ITGA6    | ITGA6    | -        |
| hsa-miR-19b | ITGB8    | ITGB8    | -        |
| hsa-miR-19b | -        | ITPR1    | ITPR1    |
| hsa-miR-19b | ITPRIPL2 | ITPRIPL2 | -        |

|             |          |          |        |
|-------------|----------|----------|--------|
| hsa-miR-19b | ITSN1    | ITSN1    | -      |
| hsa-miR-19b | JARID2   | JARID2   | -      |
| hsa-miR-19b | JAZF1    | JAZF1    | -      |
| hsa-miR-19b | -        | JMJD1C   | JMJD1C |
| hsa-miR-19b | -        | JTB      | JTB    |
| hsa-miR-19b | KATNAL1  | KATNAL1  | -      |
| hsa-miR-19b | KBTBD8   | KBTBD8   | -      |
| hsa-miR-19b | -        | KCNE4    | KCNE4  |
| hsa-miR-19b | KCNH1    | KCNH1    | -      |
| hsa-miR-19b | KCNJ2    | KCNJ2    | -      |
| hsa-miR-19b | KCNK10   | KCNK10   | -      |
| hsa-miR-19b | -        | KCNK17   | KCNK17 |
| hsa-miR-19b | KCNS2    | KCNS2    | -      |
| hsa-miR-19b | KCNT2    | KCNT2    | -      |
| hsa-miR-19b | -        | KCTD4    | KCTD4  |
| hsa-miR-19b | KDM2A    | KDM2A    | -      |
| hsa-miR-19b | KDM6A    | KDM6A    | -      |
| hsa-miR-19b | KIAA0101 | KIAA0101 | -      |
| hsa-miR-19b | KIAA0528 | KIAA0528 | -      |
| hsa-miR-19b | KIAA0907 | KIAA0907 | -      |
| hsa-miR-19b | KIAA1210 | KIAA1210 | -      |
| hsa-miR-19b | KIAA1211 | KIAA1211 | -      |
| hsa-miR-19b | KIAA1217 | KIAA1217 | -      |
| hsa-miR-19b | KIAA1244 | KIAA1244 | -      |
| hsa-miR-19b | KIAA1462 | KIAA1462 | -      |
| hsa-miR-19b | KIAA1468 | KIAA1468 | -      |
| hsa-miR-19b | KIAA1598 | KIAA1598 | -      |
| hsa-miR-19b | KIAA2026 | KIAA2026 | -      |
| hsa-miR-19b | KIF13A   | KIF13A   | -      |
| hsa-miR-19b | KIF1B    | KIF1B    | -      |
| hsa-miR-19b | KIT      | KIT      | -      |
| hsa-miR-19b | KLF10    | KLF10    | -      |
| hsa-miR-19b | -        | KLF4     | KLF4   |
| hsa-miR-19b | -        | KLHDC2   | KLHDC2 |
| hsa-miR-19b | KLHDC5   | KLHDC5   | -      |
| hsa-miR-19b | KLHL20   | KLHL20   | -      |
| hsa-miR-19b | KLHL28   | KLHL28   | -      |
| hsa-miR-19b | KLHL3    | KLHL3    | -      |
| hsa-miR-19b | KPNA3    | KPNA3    | -      |
| hsa-miR-19b | KPNA4    | KPNA4    | -      |
| hsa-miR-19b | KPNA6    | KPNA6    | -      |
| hsa-miR-19b | KRAS     | KRAS     | -      |
| hsa-miR-19b | -        | KRT15    | KRT15  |
| hsa-miR-19b | -        | KRT23    | KRT23  |
| hsa-miR-19b | L3MBTL3  | L3MBTL3  | -      |
| hsa-miR-19b | LBH      | LBH      | -      |
| hsa-miR-19b | LCLAT1   | LCLAT1   | -      |
| hsa-miR-19b | LDLR     | LDLR     | -      |
| hsa-miR-19b | -        | LHX8     | LHX8   |
| hsa-miR-19b | LIF      | LIF      | -      |
| hsa-miR-19b | LIMCH1   | LIMCH1   | -      |

|             |         |         |        |
|-------------|---------|---------|--------|
| hsa-miR-19b | LMBR1   | LMBR1   | -      |
| hsa-miR-19b | LMLN    | LMLN    | -      |
| hsa-miR-19b | LNPEP   | LNPEP   | -      |
| hsa-miR-19b | LPGAT1  | LPGAT1  | -      |
| hsa-miR-19b | LPHN2   | LPHN2   | -      |
| hsa-miR-19b | LPP     | LPP     | -      |
| hsa-miR-19b | LPPR1   | LPPR1   | -      |
| hsa-miR-19b | LRCH1   | LRCH1   | -      |
| hsa-miR-19b | LRCH2   | LRCH2   | -      |
| hsa-miR-19b | LRIG1   | LRIG1   | -      |
| hsa-miR-19b | -       | LRP2BP  | LRP2BP |
| hsa-miR-19b | LRRC16A | LRRC16A | -      |
| hsa-miR-19b | -       | LRRC45  | LRRC45 |
| hsa-miR-19b | LRRC8B  | LRRC8B  | -      |
| hsa-miR-19b | LRRK1   | LRRK1   | -      |
| hsa-miR-19b | LRRK2   | LRRK2   | -      |
| hsa-miR-19b | LSM12   | LSM12   | -      |
| hsa-miR-19b | -       | LSM3    | LSM3   |
| hsa-miR-19b | LY75    | LY75    | -      |
| hsa-miR-19b | MACF1   | MACF1   | -      |
| hsa-miR-19b | -       | MADD    | MADD   |
| hsa-miR-19b | MAGI2   | MAGI2   | -      |
| hsa-miR-19b | MAML1   | MAML1   | -      |
| hsa-miR-19b | -       | MAN1C1  | MAN1C1 |
| hsa-miR-19b | MAP1B   | MAP1B   | -      |
| hsa-miR-19b | MAP3K12 | MAP3K12 | -      |
| hsa-miR-19b | MAP3K2  | MAP3K2  | -      |
| hsa-miR-19b | MAPK1   | MAPK1   | -      |
| hsa-miR-19b | MAPK14  | MAPK14  | -      |
| hsa-miR-19b | MAPK6   | MAPK6   | -      |
| hsa-miR-19b | -       | MARCH7  | MARCH7 |
| hsa-miR-19b | MATN2   | MATN2   | -      |
| hsa-miR-19b | -       | MATN3   | MATN3  |
| hsa-miR-19b | MBD2    | MBD2    | -      |
| hsa-miR-19b | MBNL1   | MBNL1   | -      |
| hsa-miR-19b | MBNL2   | MBNL2   | -      |
| hsa-miR-19b | -       | MCOLN3  | MCOLN3 |
| hsa-miR-19b | MDFIC   | MDFIC   | -      |
| hsa-miR-19b | MDM4    | MDM4    | -      |
| hsa-miR-19b | MECOM   | MECOM   | -      |
| hsa-miR-19b | MED12L  | MED12L  | -      |
| hsa-miR-19b | MED13   | MED13   | -      |
| hsa-miR-19b | MED13L  | MED13L  | -      |
| hsa-miR-19b | MED26   | MED26   | -      |
| hsa-miR-19b | MEF2A   | MEF2A   | -      |
| hsa-miR-19b | MEX3C   | MEX3C   | -      |
| hsa-miR-19b | -       | MFN1    | MFN1   |
| hsa-miR-19b | MFSD6   | MFSD6   | -      |
| hsa-miR-19b | MIB1    | MIB1    | -      |
| hsa-miR-19b | MICAL3  | -       | MICAL3 |
| hsa-miR-19b | MINK1   | MINK1   | -      |

|             |          |          |         |
|-------------|----------|----------|---------|
| hsa-miR-19b | MKL2     | MKL2     | -       |
| hsa-miR-19b | MLEC     | MLEC     | -       |
| hsa-miR-19b | MLLT6    | MLLT6    | -       |
| hsa-miR-19b | -        | MLYCD    | MLYCD   |
| hsa-miR-19b | MMGT1    | MMGT1    | -       |
| hsa-miR-19b | -        | MMP1     | MMP1    |
| hsa-miR-19b | MN1      | MN1      | -       |
| hsa-miR-19b | MOBKL1A  | MOBKL1A  | -       |
| hsa-miR-19b | MPHOSPH9 | MPHOSPH9 | -       |
| hsa-miR-19b | MPRIP    | MPRIP    | -       |
| hsa-miR-19b | -        | MREG     | MREG    |
| hsa-miR-19b | MRPL17   | MRPL17   | -       |
| hsa-miR-19b | -        | MRPL45   | MRPL45  |
| hsa-miR-19b | MST4     | MST4     | -       |
| hsa-miR-19b | MTF2     | MTF2     | -       |
| hsa-miR-19b | MTMR10   | MTMR10   | -       |
| hsa-miR-19b | MTMR12   | MTMR12   | -       |
| hsa-miR-19b | MTMR6    | MTMR6    | -       |
| hsa-miR-19b | MXD1     | MXD1     | -       |
| hsa-miR-19b | MYBL1    | MYBL1    | -       |
| hsa-miR-19b | MYCL1    | MYCL1    | -       |
| hsa-miR-19b | MYCN     | MYCN     | -       |
| hsa-miR-19b | -        | MYH11    | MYH11   |
| hsa-miR-19b | MYLIP    | MYLIP    | -       |
| hsa-miR-19b | MYT1L    | MYT1L    | -       |
| hsa-miR-19b | NAALADL2 | NAALADL2 | -       |
| hsa-miR-19b | -        | NAB2     | NAB2    |
| hsa-miR-19b | NANP     | NANP     | -       |
| hsa-miR-19b | -        | NAP1L2   | NAP1L2  |
| hsa-miR-19b | NAPB     | NAPB     | -       |
| hsa-miR-19b | NAV1     | NAV1     | -       |
| hsa-miR-19b | NAV3     | NAV3     | -       |
| hsa-miR-19b | NBEA     | NBEA     | -       |
| hsa-miR-19b | NBEAL2   | NBEAL2   | -       |
| hsa-miR-19b | NCALD    | NCALD    | -       |
| hsa-miR-19b | -        | NCBP1    | NCBP1   |
| hsa-miR-19b | -        | NCBP2    | NCBP2   |
| hsa-miR-19b | NCKAP5   | NCKAP5   | -       |
| hsa-miR-19b | NCKIPSD  | NCKIPSD  | -       |
| hsa-miR-19b | -        | NDUFC1   | NDUFC1  |
| hsa-miR-19b | NEK9     | NEK9     | -       |
| hsa-miR-19b | NEURL1B  | NEURL1B  | -       |
| hsa-miR-19b | NEUROD4  | NEUROD4  | -       |
| hsa-miR-19b | NEUROG1  | NEUROG1  | -       |
| hsa-miR-19b | NF1      | NF1      | -       |
| hsa-miR-19b | NFIA     | NFIA     | -       |
| hsa-miR-19b | NFIB     | NFIB     | -       |
| hsa-miR-19b | -        | NFKBIA   | NFKBIA  |
| hsa-miR-19b | NGDN     | NGDN     | -       |
| hsa-miR-19b | -        | NGFRAP1  | NGFRAP1 |
| hsa-miR-19b | NHS      | NHS      | -       |



|             |         |         |         |
|-------------|---------|---------|---------|
| hsa-miR-19b | NIPA1   | NIPA1   | -       |
| hsa-miR-19b | NIPAL2  | NIPAL2  | -       |
| hsa-miR-19b | -       | NIPBL   | NIPBL   |
| hsa-miR-19b | NLK     | NLK     | -       |
| hsa-miR-19b | -       | NLRC5   | NLRC5   |
| hsa-miR-19b | -       | NME4    | NME4    |
| hsa-miR-19b | NOL4    | NOL4    | -       |
| hsa-miR-19b | NPAS2   | NPAS2   | -       |
| hsa-miR-19b | NPEPL1  | NPEPL1  | -       |
| hsa-miR-19b | -       | NPFFR2  | NPFFR2  |
| hsa-miR-19b | -       | NPL     | NPL     |
| hsa-miR-19b | NPTN    | NPTN    | -       |
| hsa-miR-19b | NR3C2   | NR3C2   | -       |
| hsa-miR-19b | NRARP   | NRARP   | -       |
| hsa-miR-19b | NRK     | NRK     | -       |
| hsa-miR-19b | NUDCD3  | NUDCD3  | -       |
| hsa-miR-19b | -       | NUDT8   | NUDT8   |
| hsa-miR-19b | NUFIP2  | NUFIP2  | -       |
| hsa-miR-19b | NUP54   | NUP54   | -       |
| hsa-miR-19b | NUS1    | NUS1    | -       |
| hsa-miR-19b | OCRL    | OCRL    | -       |
| hsa-miR-19b | -       | ODF4    | ODF4    |
| hsa-miR-19b | -       | OGG1    | OGG1    |
| hsa-miR-19b | -       | OLFML1  | OLFML1  |
| hsa-miR-19b | -       | OSGEPL1 | OSGEPL1 |
| hsa-miR-19b | -       | OTOR    | OTOR    |
| hsa-miR-19b | OTUD1   | OTUD1   | -       |
| hsa-miR-19b | OTUD7B  | OTUD7B  | -       |
| hsa-miR-19b | PACS1   | PACS1   | -       |
| hsa-miR-19b | -       | PAFAH2  | PAFAH2  |
| hsa-miR-19b | PAK6    | PAK6    | -       |
| hsa-miR-19b | PAPD4   | PAPD4   | -       |
| hsa-miR-19b | -       | PARK2   | PARK2   |
| hsa-miR-19b | PARM1   | PARM1   | -       |
| hsa-miR-19b | PATL1   | PATL1   | -       |
| hsa-miR-19b | -       | PAXIP1  | PAXIP1  |
| hsa-miR-19b | -       | PBX2    | PBX2    |
| hsa-miR-19b | PCDH15  | PCDH15  | -       |
| hsa-miR-19b | -       | PCDH8   | PCDH8   |
| hsa-miR-19b | PCDHA1  | PCDHA1  | -       |
| hsa-miR-19b | PCDHA10 | PCDHA10 | -       |
| hsa-miR-19b | PCDHA11 | PCDHA11 | -       |
| hsa-miR-19b | PCDHA12 | PCDHA12 | -       |
| hsa-miR-19b | PCDHA13 | PCDHA13 | -       |
| hsa-miR-19b | PCDHA2  | PCDHA2  | -       |
| hsa-miR-19b | PCDHA3  | PCDHA3  | -       |
| hsa-miR-19b | PCDHA4  | PCDHA4  | -       |
| hsa-miR-19b | PCDHA5  | PCDHA5  | -       |
| hsa-miR-19b | PCDHA6  | PCDHA6  | -       |
| hsa-miR-19b | PCDHA8  | PCDHA8  | -       |
| hsa-miR-19b | PCDHA9  | PCDHA9  | -       |

|             |          |          |          |
|-------------|----------|----------|----------|
| hsa-miR-19b | PCDHAC1  | PCDHAC1  | -        |
| hsa-miR-19b | PCDHAC2  | PCDHAC2  | -        |
| hsa-miR-19b | -        | PCSK6    | PCSK6    |
| hsa-miR-19b | -        | PDCD1LG2 | PDCD1LG2 |
| hsa-miR-19b | PDE5A    | PDE5A    | -        |
| hsa-miR-19b | PDE7B    | PDE7B    | -        |
| hsa-miR-19b | -        | PDHB     | PDHB     |
| hsa-miR-19b | PDIK1L   | PDIK1L   | -        |
| hsa-miR-19b | -        | PDZRN3   | PDZRN3   |
| hsa-miR-19b | PEX5L    | PEX5L    | -        |
| hsa-miR-19b | PFKFB3   | PFKFB3   | -        |
| hsa-miR-19b | -        | PFN1     | PFN1     |
| hsa-miR-19b | PFN2     | PFN2     | -        |
| hsa-miR-19b | -        | PGM2     | PGM2     |
| hsa-miR-19b | PGM2L1   | PGM2L1   | -        |
| hsa-miR-19b | PHACTR4  | PHACTR4  | -        |
| hsa-miR-19b | PHAX     | PHAX     | -        |
| hsa-miR-19b | -        | PHC3     | PHC3     |
| hsa-miR-19b | -        | PHF11    | PHF11    |
| hsa-miR-19b | PHF13    | PHF13    | -        |
| hsa-miR-19b | PHF14    | PHF14    | -        |
| hsa-miR-19b | PHF17    | PHF17    | -        |
| hsa-miR-19b | PHF20    | PHF20    | -        |
| hsa-miR-19b | PHLDA1   | PHLDA1   | -        |
| hsa-miR-19b | PHLDA3   | PHLDA3   | -        |
| hsa-miR-19b | PHLPP2   | PHLPP2   | -        |
| hsa-miR-19b | PHTF2    | PHTF2    | -        |
| hsa-miR-19b | PI15     | PI15     | -        |
| hsa-miR-19b | PI4KA    | PI4KA    | -        |
| hsa-miR-19b | PIK3R3   | PIK3R3   | -        |
| hsa-miR-19b | PIKFYVE  | PIKFYVE  | -        |
| hsa-miR-19b | PITPNM2  | PITPNM2  | -        |
| hsa-miR-19b | PKHD1    | PKHD1    | -        |
| hsa-miR-19b | PKNOX1   | PKNOX1   | -        |
| hsa-miR-19b | -        | PLAU     | PLAU     |
| hsa-miR-19b | PLCL1    | PLCL1    | -        |
| hsa-miR-19b | PLEKHM3  | PLEKHM3  | -        |
| hsa-miR-19b | PLXNA4   | PLXNA4   | -        |
| hsa-miR-19b | PMEPA1   | PMEPA1   | -        |
| hsa-miR-19b | -        | POLE4    | POLE4    |
| hsa-miR-19b | POU3F2   | POU3F2   | -        |
| hsa-miR-19b | POU4F1   | POU4F1   | -        |
| hsa-miR-19b | -        | PPIL1    | PPIL1    |
| hsa-miR-19b | PPM1A    | PPM1A    | -        |
| hsa-miR-19b | -        | PPP1R10  | PPP1R10  |
| hsa-miR-19b | PPP1R12A | PPP1R12A | -        |
| hsa-miR-19b | PPP1R13L | PPP1R13L | -        |
| hsa-miR-19b | PPP1R15B | PPP1R15B | -        |
| hsa-miR-19b | PPP2R4   | PPP2R4   | -        |
| hsa-miR-19b | PPP2R5A  | PPP2R5A  | -        |
| hsa-miR-19b | PPP2R5E  | PPP2R5E  | -        |

|             |          |          |         |
|-------------|----------|----------|---------|
| hsa-miR-19b | -        | PPP3CB   | PPP3CB  |
| hsa-miR-19b | PPTC7    | PPTC7    | -       |
| hsa-miR-19b | PRC1     | PRC1     | -       |
| hsa-miR-19b | -        | PRCP     | PRCP    |
| hsa-miR-19b | PRICKLE2 | PRICKLE2 | -       |
| hsa-miR-19b | PRKACB   | PRKACB   | -       |
| hsa-miR-19b | PROM2    | PROM2    | -       |
| hsa-miR-19b | -        | PRPF19   | PRPF19  |
| hsa-miR-19b | -        | PRPF39   | PRPF39  |
| hsa-miR-19b | -        | PRPF40A  | PRPF40A |
| hsa-miR-19b | PRR5L    | PRR5L    | -       |
| hsa-miR-19b | PRRT3    | PRRT3    | -       |
| hsa-miR-19b | -        | PRSS16   | PRSS16  |
| hsa-miR-19b | -        | PRSS23   | PRSS23  |
| hsa-miR-19b | PRUNE2   | PRUNE2   | -       |
| hsa-miR-19b | -        | PSG1     | PSG1    |
| hsa-miR-19b | -        | PSG2     | PSG2    |
| hsa-miR-19b | -        | PSG6     | PSG6    |
| hsa-miR-19b | -        | PSG9     | PSG9    |
| hsa-miR-19b | PTEN     | PTEN     | -       |
| hsa-miR-19b | -        | PTGER2   | PTGER2  |
| hsa-miR-19b | -        | PTGER3   | PTGER3  |
| hsa-miR-19b | PTGES3   | PTGES3   | -       |
| hsa-miR-19b | PTP4A1   | PTP4A1   | -       |
| hsa-miR-19b | PTPN21   | -        | PTPN21  |
| hsa-miR-19b | PTPRD    | PTPRD    | -       |
| hsa-miR-19b | PXDN     | PXDN     | -       |
| hsa-miR-19b | QKI      | QKI      | -       |
| hsa-miR-19b | R3HDM2   | R3HDM2   | -       |
| hsa-miR-19b | RAB14    | RAB14    | -       |
| hsa-miR-19b | RAB18    | RAB18    | -       |
| hsa-miR-19b | RAB1A    | RAB1A    | -       |
| hsa-miR-19b | -        | RAB2A    | RAB2A   |
| hsa-miR-19b | RAB2B    | RAB2B    | -       |
| hsa-miR-19b | RAB33B   | RAB33B   | -       |
| hsa-miR-19b | RAB5B    | RAB5B    | -       |
| hsa-miR-19b | RAB8B    | RAB8B    | -       |
| hsa-miR-19b | RABGAP1  | RABGAP1  | -       |
| hsa-miR-19b | RACGAP1  | RACGAP1  | -       |
| hsa-miR-19b | RAD23B   | RAD23B   | -       |
| hsa-miR-19b | RAF1     | RAF1     | -       |
| hsa-miR-19b | -        | RAI2     | RAI2    |
| hsa-miR-19b | RALGPS1  | RALGPS1  | -       |
| hsa-miR-19b | RAP1B    | RAP1B    | -       |
| hsa-miR-19b | RAP2C    | RAP2C    | -       |
| hsa-miR-19b | RAPGEFL1 | RAPGEFL1 | -       |
| hsa-miR-19b | RAPH1    | RAPH1    | -       |
| hsa-miR-19b | -        | RASA1    | RASA1   |
| hsa-miR-19b | RASGEF1A | RASGEF1A | -       |
| hsa-miR-19b | -        | RBBP7    | RBBP7   |
| hsa-miR-19b | -        | RBBP8    | RBBP8   |

|             |         |         |         |
|-------------|---------|---------|---------|
| hsa-miR-19b | -       | RBKS    | RBKS    |
| hsa-miR-19b | RBM20   | RBM20   | -       |
| hsa-miR-19b | -       | RBM26   | RBM26   |
| hsa-miR-19b | -       | RBM38   | RBM38   |
| hsa-miR-19b | RBMS1   | RBMS1   | -       |
| hsa-miR-19b | RBMS3   | RBMS3   | -       |
| hsa-miR-19b | -       | RBP1    | RBP1    |
| hsa-miR-19b | RCOR3   | RCOR3   | -       |
| hsa-miR-19b | REEP1   | REEP1   | -       |
| hsa-miR-19b | -       | RFTN1   | RFTN1   |
| hsa-miR-19b | RGL1    | RGL1    | -       |
| hsa-miR-19b | RGMB    | RGMB    | -       |
| hsa-miR-19b | -       | RGPD6   | RGPD6   |
| hsa-miR-19b | RGS21   | RGS21   | -       |
| hsa-miR-19b | RIC3    | RIC3    | -       |
| hsa-miR-19b | RICTOR  | RICTOR  | -       |
| hsa-miR-19b | RIMBP2  | RIMBP2  | -       |
| hsa-miR-19b | RIN2    | RIN2    | -       |
| hsa-miR-19b | RNF145  | RNF145  | -       |
| hsa-miR-19b | RNF19A  | RNF19A  | -       |
| hsa-miR-19b | RNF2    | RNF2    | -       |
| hsa-miR-19b | RNF216  | RNF216  | -       |
| hsa-miR-19b | RNF38   | RNF38   | -       |
| hsa-miR-19b | ROBO2   | ROBO2   | -       |
| hsa-miR-19b | -       | ROGDI   | ROGDI   |
| hsa-miR-19b | RORA    | RORA    | -       |
| hsa-miR-19b | -       | RPAIN   | RPAIN   |
| hsa-miR-19b | RPAP3   | RPAP3   | -       |
| hsa-miR-19b | -       | RPL26L1 | RPL26L1 |
| hsa-miR-19b | RPS6KA2 | RPS6KA2 | -       |
| hsa-miR-19b | -       | RPS6KA5 | RPS6KA5 |
| hsa-miR-19b | RRAGD   | RRAGD   | -       |
| hsa-miR-19b | RTN1    | RTN1    | -       |
| hsa-miR-19b | RTN4RL1 | RTN4RL1 | -       |
| hsa-miR-19b | RUFY3   | RUFY3   | -       |
| hsa-miR-19b | RUNX1T1 | RUNX1T1 | -       |
| hsa-miR-19b | RUNX3   | RUNX3   | -       |
| hsa-miR-19b | -       | RWDD3   | RWDD3   |
| hsa-miR-19b | S100PBP | S100PBP | -       |
| hsa-miR-19b | S1PR1   | S1PR1   | -       |
| hsa-miR-19b | S1PR2   | S1PR2   | -       |
| hsa-miR-19b | SAMD4A  | SAMD4A  | -       |
| hsa-miR-19b | SAMD8   | SAMD8   | -       |
| hsa-miR-19b | SAR1A   | SAR1A   | -       |
| hsa-miR-19b | SATB1   | SATB1   | -       |
| hsa-miR-19b | SBF2    | SBF2    | -       |
| hsa-miR-19b | SCML2   | SCML2   | -       |
| hsa-miR-19b | SCN4B   | -       | SCN4B   |
| hsa-miR-19b | SDC1    | SDC1    | -       |
| hsa-miR-19b | -       | SEC14L1 | SEC14L1 |
| hsa-miR-19b | SEC22B  | SEC22B  | -       |

|             |           |           |          |
|-------------|-----------|-----------|----------|
| hsa-miR-19b | SECISBP2L | SECISBP2L | -        |
| hsa-miR-19b | SEL1L3    | SEL1L3    | -        |
| hsa-miR-19b | SEMA6D    | SEMA6D    | -        |
| hsa-miR-19b | SERINC3   | SERINC3   | -        |
| hsa-miR-19b | -         | SERPINC1  | SERPINC1 |
| hsa-miR-19b | -         | SERPINE2  | SERPINE2 |
| hsa-miR-19b | -         | SETX      | SETX     |
| hsa-miR-19b | -         | SF3B3     | SF3B3    |
| hsa-miR-19b | SGCB      | SGCB      | -        |
| hsa-miR-19b | SGK1      | SGK1      | -        |
| hsa-miR-19b | SGMS2     | SGMS2     | -        |
| hsa-miR-19b | SH3D19    | SH3D19    | -        |
| hsa-miR-19b | SH3KBP1   | SH3KBP1   | -        |
| hsa-miR-19b | SH3RF3    | SH3RF3    | -        |
| hsa-miR-19b | SHANK2    | SHANK2    | -        |
| hsa-miR-19b | SHCBP1    | SHCBP1    | -        |
| hsa-miR-19b | SIK3      | SIK3      | -        |
| hsa-miR-19b | SIVA1     | SIVA1     | -        |
| hsa-miR-19b | SIX4      | SIX4      | -        |
| hsa-miR-19b | -         | SLC10A4   | SLC10A4  |
| hsa-miR-19b | -         | SLC13A1   | SLC13A1  |
| hsa-miR-19b | SLC24A3   | SLC24A3   | -        |
| hsa-miR-19b | SLC24A4   | SLC24A4   | -        |
| hsa-miR-19b | SLC25A12  | SLC25A12  | -        |
| hsa-miR-19b | SLC25A34  | SLC25A34  | -        |
| hsa-miR-19b | -         | SLC26A10  | SLC26A10 |
| hsa-miR-19b | SLC26A4   | SLC26A4   | -        |
| hsa-miR-19b | -         | SLC27A2   | SLC27A2  |
| hsa-miR-19b | SLC2A1    | SLC2A1    | -        |
| hsa-miR-19b | SLC2A13   | SLC2A13   | -        |
| hsa-miR-19b | SLC2A4RG  | SLC2A4RG  | -        |
| hsa-miR-19b | SLC30A7   | SLC30A7   | -        |
| hsa-miR-19b | SLC31A2   | SLC31A2   | -        |
| hsa-miR-19b | -         | SLC34A1   | SLC34A1  |
| hsa-miR-19b | SLC35F1   | SLC35F1   | -        |
| hsa-miR-19b | SLC37A1   | SLC37A1   | -        |
| hsa-miR-19b | SLC48A1   | SLC48A1   | -        |
| hsa-miR-19b | SLC5A7    | SLC5A7    | -        |
| hsa-miR-19b | SLC6A6    | SLC6A6    | -        |
| hsa-miR-19b | SLC6A8    | SLC6A8    | -        |
| hsa-miR-19b | SLC8A1    | SLC8A1    | -        |
| hsa-miR-19b | SLC9A1    | SLC9A1    | -        |
| hsa-miR-19b | SLC9A2    | SLC9A2    | -        |
| hsa-miR-19b | SLC9A6    | SLC9A6    | -        |
| hsa-miR-19b | SLMAP     | SLMAP     | -        |
| hsa-miR-19b | SMAD4     | SMAD4     | -        |
| hsa-miR-19b | SMAD5     | SMAD5     | -        |
| hsa-miR-19b | SMCR8     | SMCR8     | -        |
| hsa-miR-19b | SMG1      | SMG1      | -        |
| hsa-miR-19b | SMOC1     | SMOC1     | -        |
| hsa-miR-19b | SMOC2     | SMOC2     | -        |

|             |         |         |         |
|-------------|---------|---------|---------|
| hsa-miR-19b | -       | SMUG1   | SMUG1   |
| hsa-miR-19b | SMURF1  | SMURF1  | -       |
| hsa-miR-19b | -       | SNAPC3  | SNAPC3  |
| hsa-miR-19b | SNIP1   | SNIP1   | -       |
| hsa-miR-19b | SNX18   | SNX18   | -       |
| hsa-miR-19b | SNX27   | SNX27   | -       |
| hsa-miR-19b | -       | SNX3    | SNX3    |
| hsa-miR-19b | -       | SNX5    | SNX5    |
| hsa-miR-19b | SOCS3   | SOCS3   | -       |
| hsa-miR-19b | SOCS5   | SOCS5   | -       |
| hsa-miR-19b | SOCS6   | SOCS6   | -       |
| hsa-miR-19b | SOX5    | SOX5    | -       |
| hsa-miR-19b | SOX6    | SOX6    | -       |
| hsa-miR-19b | -       | SPATA12 | SPATA12 |
| hsa-miR-19b | SPATA2  | SPATA2  | -       |
| hsa-miR-19b | SPATS2L | SPATS2L | -       |
| hsa-miR-19b | SPEN    | SPEN    | -       |
| hsa-miR-19b | SPG20   | SPG20   | -       |
| hsa-miR-19b | SPIRE1  | SPIRE1  | -       |
| hsa-miR-19b | -       | SPTA1   | SPTA1   |
| hsa-miR-19b | -       | SQLE    | SQLE    |
| hsa-miR-19b | SRGAP2  | SRGAP2  | -       |
| hsa-miR-19b | SRGAP3  | SRGAP3  | -       |
| hsa-miR-19b | -       | ST7     | ST7     |
| hsa-miR-19b | -       | ST7L    | ST7L    |
| hsa-miR-19b | ST8SIA3 | -       | ST8SIA3 |
| hsa-miR-19b | ST8SIA4 | ST8SIA4 | -       |
| hsa-miR-19b | STAM2   | STAM2   | -       |
| hsa-miR-19b | STAT2   | STAT2   | -       |
| hsa-miR-19b | -       | STEAP2  | STEAP2  |
| hsa-miR-19b | STK35   | STK35   | -       |
| hsa-miR-19b | STK38   | STK38   | -       |
| hsa-miR-19b | STK39   | STK39   | -       |
| hsa-miR-19b | STRN3   | STRN3   | -       |
| hsa-miR-19b | STX12   | STX12   | -       |
| hsa-miR-19b | STXBP4  | STXBP4  | -       |
| hsa-miR-19b | SULF1   | SULF1   | -       |
| hsa-miR-19b | SUN1    | SUN1    | -       |
| hsa-miR-19b | SUZ12   | SUZ12   | -       |
| hsa-miR-19b | SV2A    | SV2A    | -       |
| hsa-miR-19b | SYBU    | SYBU    | -       |
| hsa-miR-19b | SYN1    | SYN1    | -       |
| hsa-miR-19b | SYNCRIP | SYNCRIP | -       |
| hsa-miR-19b | SYNM    | SYNM    | -       |
| hsa-miR-19b | SYNPO2  | SYNPO2  | -       |
| hsa-miR-19b | SYNPR   | SYNPR   | -       |
| hsa-miR-19b | SYT1    | SYT1    | -       |
| hsa-miR-19b | SYT11   | SYT11   | -       |
| hsa-miR-19b | -       | TACR2   | TACR2   |
| hsa-miR-19b | -       | TAF4B   | TAF4B   |
| hsa-miR-19b | -       | TARSL2  | TARSL2  |

|             |          |          |         |
|-------------|----------|----------|---------|
| hsa-miR-19b | TBC1D25  | TBC1D25  | -       |
| hsa-miR-19b | TBC1D8   | TBC1D8   | -       |
| hsa-miR-19b | -        | TBCA     | TBCA    |
| hsa-miR-19b | TBR1     | TBR1     | -       |
| hsa-miR-19b | TBX18    | TBX18    | -       |
| hsa-miR-19b | -        | TCEA1    | TCEA1   |
| hsa-miR-19b | TCEB3    | TCEB3    | -       |
| hsa-miR-19b | TESK2    | TESK2    | -       |
| hsa-miR-19b | TET3     | TET3     | -       |
| hsa-miR-19b | -        | TFB1M    | TFB1M   |
| hsa-miR-19b | TFCP2L1  | TFCP2L1  | -       |
| hsa-miR-19b | TFDP2    | -        | TFDP2   |
| hsa-miR-19b | TFPI     | TFPI     | -       |
| hsa-miR-19b | TGFBR2   | TGFBR2   | -       |
| hsa-miR-19b | -        | TGFBR3   | TGFBR3  |
| hsa-miR-19b | TGM2     | TGM2     | -       |
| hsa-miR-19b | TGM5     | -        | TGM5    |
| hsa-miR-19b | THBS1    | THBS1    | -       |
| hsa-miR-19b | THSD7A   | THSD7A   | -       |
| hsa-miR-19b | TIA1     | TIA1     | -       |
| hsa-miR-19b | -        | TLE1     | TLE1    |
| hsa-miR-19b | -        | TLR5     | TLR5    |
| hsa-miR-19b | TMBIM6   | TMBIM6   | -       |
| hsa-miR-19b | TMEM167B | TMEM167B | -       |
| hsa-miR-19b | -        | TMEM182  | TMEM182 |
| hsa-miR-19b | TMEM196  | TMEM196  | -       |
| hsa-miR-19b | TMEM25   | TMEM25   | -       |
| hsa-miR-19b | TMEM47   | TMEM47   | -       |
| hsa-miR-19b | TMEM63B  | TMEM63B  | -       |
| hsa-miR-19b | TMEM64   | TMEM64   | -       |
| hsa-miR-19b | TMEM9B   | TMEM9B   | -       |
| hsa-miR-19b | TNF      | TNF      | -       |
| hsa-miR-19b | TNFAIP3  | TNFAIP3  | -       |
| hsa-miR-19b | TNFRSF1B | TNFRSF1B | -       |
| hsa-miR-19b | TNKS     | TNKS     | -       |
| hsa-miR-19b | TNPO2    | TNPO2    | -       |
| hsa-miR-19b | TNRC6A   | TNRC6A   | -       |
| hsa-miR-19b | TNRC6C   | TNRC6C   | -       |
| hsa-miR-19b | -        | TNS1     | TNS1    |
| hsa-miR-19b | TOM1L1   | TOM1L1   | -       |
| hsa-miR-19b | TOM1L2   | TOM1L2   | -       |
| hsa-miR-19b | -        | TP53     | TP53    |
| hsa-miR-19b | TPRG1L   | TPRG1L   | -       |
| hsa-miR-19b | TRAK2    | TRAK2    | -       |
| hsa-miR-19b | TRERF1   | TRERF1   | -       |
| hsa-miR-19b | TRIM2    | TRIM2    | -       |
| hsa-miR-19b | TRIM23   | TRIM23   | -       |
| hsa-miR-19b | TRIM33   | TRIM33   | -       |
| hsa-miR-19b | TRIM37   | TRIM37   | -       |
| hsa-miR-19b | -        | TRO      | TRO     |
| hsa-miR-19b | TRPC3    | TRPC3    | -       |

|             |         |         |        |
|-------------|---------|---------|--------|
| hsa-miR-19b | TRPS1   | TRPS1   | -      |
| hsa-miR-19b | TSC1    | TSC1    | -      |
| hsa-miR-19b | TSHZ3   | TSHZ3   | -      |
| hsa-miR-19b | TSPAN18 | TSPAN18 | -      |
| hsa-miR-19b | -       | TSPAN6  | TSPAN6 |
| hsa-miR-19b | TTC9    | TTC9    | -      |
| hsa-miR-19b | TUB     | TUB     | -      |
| hsa-miR-19b | -       | TUSC2   | TUSC2  |
| hsa-miR-19b | -       | TUSC3   | TUSC3  |
| hsa-miR-19b | TXLNA   | TXLNA   | -      |
| hsa-miR-19b | TXLNG   | TXLNG   | -      |
| hsa-miR-19b | UBE2A   | UBE2A   | -      |
| hsa-miR-19b | UBE2D2  | UBE2D2  | -      |
| hsa-miR-19b | UBFD1   | UBFD1   | -      |
| hsa-miR-19b | UBL3    | UBL3    | -      |
| hsa-miR-19b | UBN1    | UBN1    | -      |
| hsa-miR-19b | UBXN2B  | UBXN2B  | -      |
| hsa-miR-19b | UCP3    | UCP3    | -      |
| hsa-miR-19b | -       | UFD1L   | UFD1L  |
| hsa-miR-19b | UHMK1   | UHMK1   | -      |
| hsa-miR-19b | -       | UHRF2   | UHRF2  |
| hsa-miR-19b | ULK2    | ULK2    | -      |
| hsa-miR-19b | UNC13A  | UNC13A  | -      |
| hsa-miR-19b | USP12   | USP12   | -      |
| hsa-miR-19b | USP13   | USP13   | -      |
| hsa-miR-19b | USP33   | USP33   | -      |
| hsa-miR-19b | USP37   | USP37   | -      |
| hsa-miR-19b | UTY     | UTY     | -      |
| hsa-miR-19b | VAMP3   | VAMP3   | -      |
| hsa-miR-19b | VAT1L   | VAT1L   | -      |
| hsa-miR-19b | VAV2    | VAV2    | -      |
| hsa-miR-19b | VCPIP1  | VCPIP1  | -      |
| hsa-miR-19b | VGLL4   | VGLL4   | -      |
| hsa-miR-19b | -       | VPS13A  | VPS13A |
| hsa-miR-19b | VPS13D  | VPS13D  | -      |
| hsa-miR-19b | VPS37B  | -       | VPS37B |
| hsa-miR-19b | VSIG10  | VSIG10  | -      |
| hsa-miR-19b | VSIG10L | VSIG10L | -      |
| hsa-miR-19b | VSTM2B  | VSTM2B  | -      |
| hsa-miR-19b | VSTM2L  | VSTM2L  | -      |
| hsa-miR-19b | VTI1A   | VTI1A   | -      |
| hsa-miR-19b | -       | VWA2    | VWA2   |
| hsa-miR-19b | WAC     | WAC     | -      |
| hsa-miR-19b | WBP2    | WBP2    | -      |
| hsa-miR-19b | WDFY3   | WDFY3   | -      |
| hsa-miR-19b | WDR1    | WDR1    | -      |
| hsa-miR-19b | WDR26   | WDR26   | -      |
| hsa-miR-19b | WDR44   | WDR44   | -      |
| hsa-miR-19b | WDR45L  | WDR45L  | -      |
| hsa-miR-19b | WHSC1L1 | WHSC1L1 | -      |
| hsa-miR-19b | WNK1    | WNK1    | -      |



|              |         |          |          |
|--------------|---------|----------|----------|
| hsa-miR-19b  | WNT10A  | WNT10A   | -        |
| hsa-miR-19b  | -       | WNT2B    | WNT2B    |
| hsa-miR-19b  | WWP1    | WWP1     | -        |
| hsa-miR-19b  | -       | XG       | XG       |
| hsa-miR-19b  | XYLT1   | XYLT1    | -        |
| hsa-miR-19b  | YAF2    | YAF2     | -        |
| hsa-miR-19b  | YTHDF2  | YTHDF2   | -        |
| hsa-miR-19b  | ZAK     | ZAK      | -        |
| hsa-miR-19b  | -       | ZBED5    | ZBED5    |
| hsa-miR-19b  | ZBTB11  | ZBTB11   | -        |
| hsa-miR-19b  | ZBTB4   | ZBTB4    | -        |
| hsa-miR-19b  | ZBTB47  | ZBTB47   | -        |
| hsa-miR-19b  | ZBTB7B  | ZBTB7B   | -        |
| hsa-miR-19b  | -       | ZC3HAV1L | ZC3HAV1L |
| hsa-miR-19b  | -       | ZCCHC7   | ZCCHC7   |
| hsa-miR-19b  | ZDHHC18 | ZDHHC18  | -        |
| hsa-miR-19b  | ZDHHC23 | ZDHHC23  | -        |
| hsa-miR-19b  | ZEB2    | ZEB2     | -        |
| hsa-miR-19b  | ZER1    | ZER1     | -        |
| hsa-miR-19b  | ZFAND6  | ZFAND6   | -        |
| hsa-miR-19b  | ZFP161  | ZFP161   | -        |
| hsa-miR-19b  | ZFP91   | ZFP91    | -        |
| hsa-miR-19b  | ZFPM2   | ZFPM2    | -        |
| hsa-miR-19b  | ZFYVE26 | ZFYVE26  | -        |
| hsa-miR-19b  | -       | ZIC5     | ZIC5     |
| hsa-miR-19b  | ZMAT3   | ZMAT3    | -        |
| hsa-miR-19b  | ZMYM2   | ZMYM2    | -        |
| hsa-miR-19b  | ZNF238  | ZNF238   | -        |
| hsa-miR-19b  | -       | ZNF254   | ZNF254   |
| hsa-miR-19b  | -       | ZNF322B  | ZNF322B  |
| hsa-miR-19b  | ZNF367  | ZNF367   | -        |
| hsa-miR-19b  | ZNF469  | ZNF469   | -        |
| hsa-miR-19b  | ZNF516  | ZNF516   | -        |
| hsa-miR-19b  | ZNF518A | ZNF518A  | -        |
| hsa-miR-19b  | ZNF521  | ZNF521   | -        |
| hsa-miR-19b  | ZNF654  | ZNF654   | -        |
| hsa-miR-19b  | ZNF710  | ZNF710   | -        |
| hsa-miR-19b  | ZNF711  | ZNF711   | -        |
| hsa-miR-19b  | -       | ZNF804A  | ZNF804A  |
| hsa-miR-19b  | ZNF831  | ZNF831   | -        |
| hsa-miR-19b  | ZNF862  | ZNF862   | -        |
| hsa-miR-19b  | ZNRF3   | ZNRF3    | -        |
| hsa-miR-19b  | ZPLD1   | ZPLD1    | -        |
| hsa-miR-202* | -       | ABCC10   | ABCC10   |
| hsa-miR-202* | -       | ACPP     | ACPP     |
| hsa-miR-202* | -       | ADD2     | ADD2     |
| hsa-miR-202* | -       | ADRA1A   | ADRA1A   |
| hsa-miR-202* | -       | AGBL5    | AGBL5    |
| hsa-miR-202* | -       | ANAPC4   | ANAPC4   |
| hsa-miR-202* | -       | ANKRD23  | ANKRD23  |
| hsa-miR-202* | -       | ANLN     | ANLN     |

|              |   |           |           |
|--------------|---|-----------|-----------|
| hsa-miR-202* | - | ANP32E    | ANP32E    |
| hsa-miR-202* | - | ARMC2     | ARMC2     |
| hsa-miR-202* | - | ASMTL     | ASMTL     |
| hsa-miR-202* | - | ASZ1      | ASZ1      |
| hsa-miR-202* | - | ATG12     | ATG12     |
| hsa-miR-202* | - | ATP12A    | ATP12A    |
| hsa-miR-202* | - | ATP5G3    | ATP5G3    |
| hsa-miR-202* | - | B3GNT5    | B3GNT5    |
| hsa-miR-202* | - | B4GALNT2  | B4GALNT2  |
| hsa-miR-202* | - | BCL6B     | BCL6B     |
| hsa-miR-202* | - | BMP1      | BMP1      |
| hsa-miR-202* | - | BPGM      | BPGM      |
| hsa-miR-202* | - | BTLA      | BTLA      |
| hsa-miR-202* | - | C11orf46  | C11orf46  |
| hsa-miR-202* | - | C11orf72  | C11orf72  |
| hsa-miR-202* | - | C12orf48  | C12orf48  |
| hsa-miR-202* | - | C13orf34  | C13orf34  |
| hsa-miR-202* | - | C14orf101 | C14orf101 |
| hsa-miR-202* | - | C17orf75  | C17orf75  |
| hsa-miR-202* | - | C18orf21  | C18orf21  |
| hsa-miR-202* | - | C1QL3     | C1QL3     |
| hsa-miR-202* | - | C1orf26   | C1orf26   |
| hsa-miR-202* | - | C21orf34  | C21orf34  |
| hsa-miR-202* | - | C21orf67  | C21orf67  |
| hsa-miR-202* | - | C22orf25  | C22orf25  |
| hsa-miR-202* | - | C2orf29   | C2orf29   |
| hsa-miR-202* | - | C2orf34   | C2orf34   |
| hsa-miR-202* | - | C3orf19   | C3orf19   |
| hsa-miR-202* | - | C3orf63   | C3orf63   |
| hsa-miR-202* | - | C4orf33   | C4orf33   |
| hsa-miR-202* | - | C5orf20   | C5orf20   |
| hsa-miR-202* | - | CAMTA2    | CAMTA2    |
| hsa-miR-202* | - | CAPN10    | CAPN10    |
| hsa-miR-202* | - | CASP10    | CASP10    |
| hsa-miR-202* | - | CCDC129   | CCDC129   |
| hsa-miR-202* | - | CD300LB   | CD300LB   |
| hsa-miR-202* | - | CD80      | CD80      |
| hsa-miR-202* | - | CDC123    | CDC123    |
| hsa-miR-202* | - | CNOT10    | CNOT10    |
| hsa-miR-202* | - | CNOT2     | CNOT2     |
| hsa-miR-202* | - | COIL      | COIL      |
| hsa-miR-202* | - | COPG      | COPG      |
| hsa-miR-202* | - | COX10     | COX10     |
| hsa-miR-202* | - | CPA6      | CPA6      |
| hsa-miR-202* | - | CRISP2    | CRISP2    |
| hsa-miR-202* | - | CRLS1     | CRLS1     |
| hsa-miR-202* | - | CSAD      | CSAD      |
| hsa-miR-202* | - | CTNNBIP1  | CTNNBIP1  |
| hsa-miR-202* | - | CWF19L2   | CWF19L2   |
| hsa-miR-202* | - | DBC1      | DBC1      |
| hsa-miR-202* | - | DIRC1     | DIRC1     |

|              |   |           |           |
|--------------|---|-----------|-----------|
| hsa-miR-202* | - | DMC1      | DMC1      |
| hsa-miR-202* | - | DMRTA1    | DMRTA1    |
| hsa-miR-202* | - | DNTT      | DNTT      |
| hsa-miR-202* | - | DPY19L1   | DPY19L1   |
| hsa-miR-202* | - | DUSP27    | DUSP27    |
| hsa-miR-202* | - | ECHDC1    | ECHDC1    |
| hsa-miR-202* | - | EGR1      | EGR1      |
| hsa-miR-202* | - | EIF2C2    | EIF2C2    |
| hsa-miR-202* | - | EIF4E     | EIF4E     |
| hsa-miR-202* | - | EIF4G3    | EIF4G3    |
| hsa-miR-202* | - | ERBB2IP   | ERBB2IP   |
| hsa-miR-202* | - | EWSR1     | EWSR1     |
| hsa-miR-202* | - | FAHD2A    | FAHD2A    |
| hsa-miR-202* | - | FAHD2B    | FAHD2B    |
| hsa-miR-202* | - | FAM64A    | FAM64A    |
| hsa-miR-202* | - | FBXO8     | FBXO8     |
| hsa-miR-202* | - | FGFR2     | FGFR2     |
| hsa-miR-202* | - | FNBP1L    | FNBP1L    |
| hsa-miR-202* | - | GCET2     | GCET2     |
| hsa-miR-202* | - | GDA       | GDA       |
| hsa-miR-202* | - | GDF9      | GDF9      |
| hsa-miR-202* | - | GLRX      | GLRX      |
| hsa-miR-202* | - | GMEB1     | GMEB1     |
| hsa-miR-202* | - | GMNN      | GMNN      |
| hsa-miR-202* | - | GPM6B     | GPM6B     |
| hsa-miR-202* | - | GPR137B   | GPR137B   |
| hsa-miR-202* | - | GPR172A   | GPR172A   |
| hsa-miR-202* | - | GRM7      | GRM7      |
| hsa-miR-202* | - | HBXIP     | HBXIP     |
| hsa-miR-202* | - | HDAC8     | HDAC8     |
| hsa-miR-202* | - | HES5      | HES5      |
| hsa-miR-202* | - | HIST1H2BC | HIST1H2BC |
| hsa-miR-202* | - | HLA-DPB1  | HLA-DPB1  |
| hsa-miR-202* | - | HMGCLL1   | HMGCLL1   |
| hsa-miR-202* | - | HOMER1    | HOMER1    |
| hsa-miR-202* | - | HRH1      | HRH1      |
| hsa-miR-202* | - | HSPA2     | HSPA2     |
| hsa-miR-202* | - | IRAK1BP1  | IRAK1BP1  |
| hsa-miR-202* | - | ITGB3     | ITGB3     |
| hsa-miR-202* | - | IWS1      | IWS1      |
| hsa-miR-202* | - | KBTBD8    | KBTBD8    |
| hsa-miR-202* | - | KIAA1468  | KIAA1468  |
| hsa-miR-202* | - | KIAA1529  | KIAA1529  |
| hsa-miR-202* | - | KIRREL2   | KIRREL2   |
| hsa-miR-202* | - | LANCL3    | LANCL3    |
| hsa-miR-202* | - | LHFPL1    | LHFPL1    |
| hsa-miR-202* | - | LIF       | LIF       |
| hsa-miR-202* | - | LRP6      | LRP6      |
| hsa-miR-202* | - | LRRC7     | LRRC7     |
| hsa-miR-202* | - | LYN       | LYN       |
| hsa-miR-202* | - | MATN2     | MATN2     |

|              |   |          |          |
|--------------|---|----------|----------|
| hsa-miR-202* | - | MCC      | MCC      |
| hsa-miR-202* | - | MEIS2    | MEIS2    |
| hsa-miR-202* | - | METRNL   | METRNL   |
| hsa-miR-202* | - | MMP20    | MMP20    |
| hsa-miR-202* | - | MMP21    | MMP21    |
| hsa-miR-202* | - | MOCS3    | MOCS3    |
| hsa-miR-202* | - | MRPS12   | MRPS12   |
| hsa-miR-202* | - | MRPS36   | MRPS36   |
| hsa-miR-202* | - | MYO1B    | MYO1B    |
| hsa-miR-202* | - | MYO1E    | MYO1E    |
| hsa-miR-202* | - | NAGPA    | NAGPA    |
| hsa-miR-202* | - | NDFIP1   | NDFIP1   |
| hsa-miR-202* | - | NEUROG2  | NEUROG2  |
| hsa-miR-202* | - | NME1     | NME1     |
| hsa-miR-202* | - | NOTCH1   | NOTCH1   |
| hsa-miR-202* | - | NSUN2    | NSUN2    |
| hsa-miR-202* | - | OCA2     | OCA2     |
| hsa-miR-202* | - | ODF1     | ODF1     |
| hsa-miR-202* | - | ODZ3     | ODZ3     |
| hsa-miR-202* | - | OXNAD1   | OXNAD1   |
| hsa-miR-202* | - | PALMD    | PALMD    |
| hsa-miR-202* | - | PDE6A    | PDE6A    |
| hsa-miR-202* | - | PDHX     | PDHX     |
| hsa-miR-202* | - | PELI3    | PELI3    |
| hsa-miR-202* | - | PHYH     | PHYH     |
| hsa-miR-202* | - | PIGS     | PIGS     |
| hsa-miR-202* | - | PIK3CA   | PIK3CA   |
| hsa-miR-202* | - | PPIC     | PPIC     |
| hsa-miR-202* | - | PPP5C    | PPP5C    |
| hsa-miR-202* | - | PRKDC    | PRKDC    |
| hsa-miR-202* | - | PSMD8    | PSMD8    |
| hsa-miR-202* | - | PTPN3    | PTPN3    |
| hsa-miR-202* | - | RARRES1  | RARRES1  |
| hsa-miR-202* | - | RFESD    | RFESD    |
| hsa-miR-202* | - | RFPL1    | RFPL1    |
| hsa-miR-202* | - | RFPL3    | RFPL3    |
| hsa-miR-202* | - | RNF6     | RNF6     |
| hsa-miR-202* | - | RPL13A   | RPL13A   |
| hsa-miR-202* | - | RPL7L1   | RPL7L1   |
| hsa-miR-202* | - | RTKN     | RTKN     |
| hsa-miR-202* | - | RTN3     | RTN3     |
| hsa-miR-202* | - | SALL2    | SALL2    |
| hsa-miR-202* | - | SCGB1C1  | SCGB1C1  |
| hsa-miR-202* | - | SCLY     | SCLY     |
| hsa-miR-202* | - | SCML4    | SCML4    |
| hsa-miR-202* | - | SCO1     | SCO1     |
| hsa-miR-202* | - | SERPINA7 | SERPINA7 |
| hsa-miR-202* | - | SFRS4    | SFRS4    |
| hsa-miR-202* | - | SGTA     | SGTA     |
| hsa-miR-202* | - | SLC22A7  | SLC22A7  |
| hsa-miR-202* | - | SLC30A9  | SLC30A9  |

|              |       |           |           |
|--------------|-------|-----------|-----------|
| hsa-miR-202* | -     | SLC4A8    | SLC4A8    |
| hsa-miR-202* | -     | SLITRK6   | SLITRK6   |
| hsa-miR-202* | -     | SMAD9     | SMAD9     |
| hsa-miR-202* | -     | SORCS1    | SORCS1    |
| hsa-miR-202* | -     | SPINT1    | SPINT1    |
| hsa-miR-202* | -     | SRFBP1    | SRFBP1    |
| hsa-miR-202* | -     | STOX2     | STOX2     |
| hsa-miR-202* | -     | SUCLA2    | SUCLA2    |
| hsa-miR-202* | -     | TACC2     | TACC2     |
| hsa-miR-202* | -     | TCEAL8    | TCEAL8    |
| hsa-miR-202* | -     | TDRD10    | TDRD10    |
| hsa-miR-202* | -     | TDRKH     | TDRKH     |
| hsa-miR-202* | -     | TEK       | TEK       |
| hsa-miR-202* | -     | TGFB2     | TGFB2     |
| hsa-miR-202* | -     | TMEM163   | TMEM163   |
| hsa-miR-202* | -     | TMUB2     | TMUB2     |
| hsa-miR-202* | -     | TNFAIP8L2 | TNFAIP8L2 |
| hsa-miR-202* | -     | TOX3      | TOX3      |
| hsa-miR-202* | -     | TRAK1     | TRAK1     |
| hsa-miR-202* | -     | TRIM34    | TRIM34    |
| hsa-miR-202* | -     | TRIM9     | TRIM9     |
| hsa-miR-202* | -     | TRIT1     | TRIT1     |
| hsa-miR-202* | -     | TRNT1     | TRNT1     |
| hsa-miR-202* | -     | TRPM3     | TRPM3     |
| hsa-miR-202* | -     | TSPAN12   | TSPAN12   |
| hsa-miR-202* | -     | TSPAN31   | TSPAN31   |
| hsa-miR-202* | -     | TTC25     | TTC25     |
| hsa-miR-202* | -     | TTC4      | TTC4      |
| hsa-miR-202* | -     | USP15     | USP15     |
| hsa-miR-202* | -     | VANGL1    | VANGL1    |
| hsa-miR-202* | -     | VPS36     | VPS36     |
| hsa-miR-202* | -     | WIP1      | WIP1      |
| hsa-miR-202* | -     | XPNPEP2   | XPNPEP2   |
| hsa-miR-202* | -     | ZBTB10    | ZBTB10    |
| hsa-miR-202* | -     | ZNF131    | ZNF131    |
| hsa-miR-202* | -     | ZNF207    | ZNF207    |
| hsa-miR-202* | -     | ZNF354C   | ZNF354C   |
| hsa-miR-202* | -     | ZNF41     | ZNF41     |
| hsa-miR-202* | -     | ZNF460    | ZNF460    |
| hsa-miR-202* | -     | ZNF487    | ZNF487    |
| hsa-miR-202* | -     | ZNF529    | ZNF529    |
| hsa-miR-202* | -     | ZNF611    | ZNF611    |
| hsa-miR-202* | -     | ZNF622    | ZNF622    |
| hsa-miR-202* | -     | ZNF660    | ZNF660    |
| hsa-miR-202* | -     | ZNF665    | ZNF665    |
| hsa-miR-20b  | -     | AADAC     | AADAC     |
| hsa-miR-20b  | -     | AADAT     | AADAT     |
| hsa-miR-20b  | -     | AARS2     | AARS2     |
| hsa-miR-20b  | ABCA1 | ABCA1     | -         |
| hsa-miR-20b  | -     | ABCB9     | ABCB9     |
| hsa-miR-20b  | -     | ABCD3     | ABCD3     |

|             |          |          |          |
|-------------|----------|----------|----------|
| hsa-miR-20b | ABCG4    | ABCG4    | -        |
| hsa-miR-20b | -        | ABHD11   | ABHD11   |
| hsa-miR-20b | ABHD5    | ABHD5    | -        |
| hsa-miR-20b | ABL2     | ABL2     | -        |
| hsa-miR-20b | ACAP2    | ACAP2    | -        |
| hsa-miR-20b | ACBD5    | ACBD5    | -        |
| hsa-miR-20b | ACSL4    | ACSL4    | -        |
| hsa-miR-20b | -        | ACTL6A   | ACTL6A   |
| hsa-miR-20b | ACTR1A   | ACTR1A   | -        |
| hsa-miR-20b | ADAM9    | ADAM9    | -        |
| hsa-miR-20b | -        | ADAMTS9  | ADAMTS9  |
| hsa-miR-20b | ADAR     | ADAR     | -        |
| hsa-miR-20b | ADIPOR2  | ADIPOR2  | -        |
| hsa-miR-20b | AEN      | AEN      | -        |
| hsa-miR-20b | AFF1     | AFF1     | -        |
| hsa-miR-20b | AFF4     | AFF4     | -        |
| hsa-miR-20b | AGFG2    | AGFG2    | -        |
| hsa-miR-20b | -        | AHI1     | AHI1     |
| hsa-miR-20b | AHNAK    | AHNAK    | -        |
| hsa-miR-20b | AHRR     | AHRR     | -        |
| hsa-miR-20b | -        | AIG1     | AIG1     |
| hsa-miR-20b | AKAP11   | AKAP11   | -        |
| hsa-miR-20b | AKAP13   | AKAP13   | -        |
| hsa-miR-20b | AKT3     | AKT3     | -        |
| hsa-miR-20b | AKTIP    | AKTIP    | -        |
| hsa-miR-20b | ALDH1A3  | ALDH1A3  | -        |
| hsa-miR-20b | -        | ALDH8A1  | ALDH8A1  |
| hsa-miR-20b | -        | ALDH9A1  | ALDH9A1  |
| hsa-miR-20b | -        | ALPK1    | ALPK1    |
| hsa-miR-20b | ALX4     | ALX4     | -        |
| hsa-miR-20b | ANKFY1   | ANKFY1   | -        |
| hsa-miR-20b | ANKH     | ANKH     | -        |
| hsa-miR-20b | ANKIB1   | ANKIB1   | -        |
| hsa-miR-20b | -        | ANKK1    | ANKK1    |
| hsa-miR-20b | ANKRD12  | ANKRD12  | -        |
| hsa-miR-20b | ANKRD13C | ANKRD13C | -        |
| hsa-miR-20b | ANKRD29  | ANKRD29  | -        |
| hsa-miR-20b | -        | ANKRD44  | ANKRD44  |
| hsa-miR-20b | ANKRD50  | ANKRD50  | -        |
| hsa-miR-20b | ANKRD52  | ANKRD52  | -        |
| hsa-miR-20b | ANKRD57  | ANKRD57  | -        |
| hsa-miR-20b | ANO6     | ANO6     | -        |
| hsa-miR-20b | ANUBL1   | ANUBL1   | -        |
| hsa-miR-20b | AP2B1    | AP2B1    | -        |
| hsa-miR-20b | APBB2    | APBB2    | -        |
| hsa-miR-20b | APCDD1   | APCDD1   | -        |
| hsa-miR-20b | -        | APOBEC3H | APOBEC3H |
| hsa-miR-20b | ARAP2    | ARAP2    | -        |
| hsa-miR-20b | ARHGAP1  | ARHGAP1  | -        |
| hsa-miR-20b | ARHGAP12 | ARHGAP12 | -        |
| hsa-miR-20b | ARHGAP26 | ARHGAP26 | -        |

|             |          |          |          |
|-------------|----------|----------|----------|
| hsa-miR-20b | ARHGEF10 | ARHGEF10 | -        |
| hsa-miR-20b | ARHGEF11 | ARHGEF11 | -        |
| hsa-miR-20b | ARHGEF18 | ARHGEF18 | -        |
| hsa-miR-20b | ARHGEF3  | ARHGEF3  | -        |
| hsa-miR-20b | ARHGEF7  | ARHGEF7  | -        |
| hsa-miR-20b | ARID4A   | ARID4A   | -        |
| hsa-miR-20b | ARL1     | ARL1     | -        |
| hsa-miR-20b | ARL4A    | ARL4A    | -        |
| hsa-miR-20b | ARL4C    | ARL4C    | -        |
| hsa-miR-20b | -        | ARSE     | ARSE     |
| hsa-miR-20b | ARSJ     | ARSJ     | -        |
| hsa-miR-20b | -        | ASB9     | ASB9     |
| hsa-miR-20b | ASF1A    | ASF1A    | -        |
| hsa-miR-20b | -        | ASL      | ASL      |
| hsa-miR-20b | -        | ATG10    | ATG10    |
| hsa-miR-20b | ATG16L1  | ATG16L1  | -        |
| hsa-miR-20b | ATG2A    | ATG2A    | -        |
| hsa-miR-20b | ATG2B    | ATG2B    | -        |
| hsa-miR-20b | ATG7     | ATG7     | -        |
| hsa-miR-20b | ATL3     | ATL3     | -        |
| hsa-miR-20b | ATP11A   | ATP11A   | -        |
| hsa-miR-20b | -        | ATP12A   | ATP12A   |
| hsa-miR-20b | ATP1A2   | ATP1A2   | -        |
| hsa-miR-20b | ATP2B2   | ATP2B2   | -        |
| hsa-miR-20b | -        | ATP6V0E1 | ATP6V0E1 |
| hsa-miR-20b | ATXN1    | ATXN1    | -        |
| hsa-miR-20b | ATXN1L   | ATXN1L   | -        |
| hsa-miR-20b | -        | B3GALNT2 | B3GALNT2 |
| hsa-miR-20b | B3GALT2  | B3GALT2  | -        |
| hsa-miR-20b | B4GALT6  | B4GALT6  | -        |
| hsa-miR-20b | BAHD1    | BAHD1    | -        |
| hsa-miR-20b | BBX      | BBX      | -        |
| hsa-miR-20b | BCL11B   | BCL11B   | -        |
| hsa-miR-20b | BCL2L11  | -        | BCL2L11  |
| hsa-miR-20b | BCL2L2   | BCL2L2   | -        |
| hsa-miR-20b | BCL6B    | BCL6B    | -        |
| hsa-miR-20b | BCR      | BCR      | -        |
| hsa-miR-20b | BECN1    | BECN1    | -        |
| hsa-miR-20b | BHLHE41  | BHLHE41  | -        |
| hsa-miR-20b | -        | BHMT2    | BHMT2    |
| hsa-miR-20b | BICD2    | BICD2    | -        |
| hsa-miR-20b | -        | BLZF1    | BLZF1    |
| hsa-miR-20b | BMP2     | BMP2     | -        |
| hsa-miR-20b | BMPR2    | BMPR2    | -        |
| hsa-miR-20b | BNIP3L   | BNIP3L   | -        |
| hsa-miR-20b | -        | BNIPL    | BNIPL    |
| hsa-miR-20b | -        | BPHL     | BPHL     |
| hsa-miR-20b | BRMS1L   | BRMS1L   | -        |
| hsa-miR-20b | BTBD10   | BTBD10   | -        |
| hsa-miR-20b | BTBD7    | BTBD7    | -        |
| hsa-miR-20b | -        | BTBD8    | BTBD8    |

|             |           |           |           |
|-------------|-----------|-----------|-----------|
| hsa-miR-20b | -         | BTN1A1    | BTN1A1    |
| hsa-miR-20b | BVES      | BVES      | -         |
| hsa-miR-20b | -         | C10orf58  | C10orf58  |
| hsa-miR-20b | -         | C10orf76  | C10orf76  |
| hsa-miR-20b | C11orf30  | C11orf30  | -         |
| hsa-miR-20b | -         | C11orf63  | C11orf63  |
| hsa-miR-20b | C11orf82  | C11orf82  | -         |
| hsa-miR-20b | C11orf95  | C11orf95  | -         |
| hsa-miR-20b | -         | C12orf24  | C12orf24  |
| hsa-miR-20b | -         | C14orf177 | C14orf177 |
| hsa-miR-20b | C14orf28  | C14orf28  | -         |
| hsa-miR-20b | C15orf17  | C15orf17  | -         |
| hsa-miR-20b | C16orf52  | C16orf52  | -         |
| hsa-miR-20b | C16orf72  | C16orf72  | -         |
| hsa-miR-20b | C17orf39  | C17orf39  | -         |
| hsa-miR-20b | -         | C17orf69  | C17orf69  |
| hsa-miR-20b | C18orf19  | C18orf19  | -         |
| hsa-miR-20b | C19orf2   | C19orf2   | -         |
| hsa-miR-20b | -         | C19orf40  | C19orf40  |
| hsa-miR-20b | C1orf173  | C1orf173  | -         |
| hsa-miR-20b | C1orf9    | C1orf9    | -         |
| hsa-miR-20b | C20orf103 | C20orf103 | -         |
| hsa-miR-20b | -         | C21orf58  | C21orf58  |
| hsa-miR-20b | -         | C21orf63  | C21orf63  |
| hsa-miR-20b | C2CD2     | C2CD2     | -         |
| hsa-miR-20b | -         | C2orf15   | C2orf15   |
| hsa-miR-20b | -         | C2orf48   | C2orf48   |
| hsa-miR-20b | C2orf69   | C2orf69   | -         |
| hsa-miR-20b | C3orf38   | C3orf38   | -         |
| hsa-miR-20b | C3orf70   | C3orf70   | -         |
| hsa-miR-20b | C5orf41   | C5orf41   | -         |
| hsa-miR-20b | C6orf120  | C6orf120  | -         |
| hsa-miR-20b | C7orf41   | C7orf41   | -         |
| hsa-miR-20b | C7orf60   | C7orf60   | -         |
| hsa-miR-20b | -         | C8A       | C8A       |
| hsa-miR-20b | -         | C8orf44   | C8orf44   |
| hsa-miR-20b | C9orf40   | C9orf40   | -         |
| hsa-miR-20b | C9orf5    | C9orf5    | -         |
| hsa-miR-20b | -         | C9orf64   | C9orf64   |
| hsa-miR-20b | -         | C9orf78   | C9orf78   |
| hsa-miR-20b | -         | C9orf80   | C9orf80   |
| hsa-miR-20b | CADM2     | CADM2     | -         |
| hsa-miR-20b | CALD1     | CALD1     | -         |
| hsa-miR-20b | CAMK2N2   | CAMK2N2   | -         |
| hsa-miR-20b | -         | CAMKK1    | CAMKK1    |
| hsa-miR-20b | CAMTA1    | CAMTA1    | -         |
| hsa-miR-20b | CANT1     | CANT1     | -         |
| hsa-miR-20b | -         | CAPN13    | CAPN13    |
| hsa-miR-20b | CAPRIN1   | CAPRIN1   | -         |
| hsa-miR-20b | CASP2     | CASP2     | -         |
| hsa-miR-20b | -         | CASP6     | CASP6     |



|             |         |         |        |
|-------------|---------|---------|--------|
| hsa-miR-20b | CASP7   | CASP7   | -      |
| hsa-miR-20b | CCDC25  | CCDC25  | -      |
| hsa-miR-20b | CCND1   | CCND1   | -      |
| hsa-miR-20b | CCND2   | CCND2   | -      |
| hsa-miR-20b | CCNG2   | CCNG2   | -      |
| hsa-miR-20b | CCNJ    | CCNJ    | -      |
| hsa-miR-20b | CCNT2   | CCNT2   | -      |
| hsa-miR-20b | -       | CD68    | CD68   |
| hsa-miR-20b | CD69    | CD69    | -      |
| hsa-miR-20b | -       | CDAN1   | CDAN1  |
| hsa-miR-20b | CDC23   | CDC23   | -      |
| hsa-miR-20b | CDC25A  | CDC25A  | -      |
| hsa-miR-20b | CDC40   | CDC40   | -      |
| hsa-miR-20b | CDCA7   | CDCA7   | -      |
| hsa-miR-20b | CDH24   | CDH24   | -      |
| hsa-miR-20b | CDKN1A  | CDKN1A  | -      |
| hsa-miR-20b | CELF2   | CELF2   | -      |
| hsa-miR-20b | CELSR2  | CELSR2  | -      |
| hsa-miR-20b | -       | CENPL   | CENPL  |
| hsa-miR-20b | CENPO   | CENPO   | -      |
| hsa-miR-20b | CENPQ   | CENPQ   | -      |
| hsa-miR-20b | CEP120  | CEP120  | -      |
| hsa-miR-20b | -       | CEP152  | CEP152 |
| hsa-miR-20b | CEP170  | CEP170  | -      |
| hsa-miR-20b | CEP57   | CEP57   | -      |
| hsa-miR-20b | CEP97   | CEP97   | -      |
| hsa-miR-20b | CFL2    | CFL2    | -      |
| hsa-miR-20b | -       | CFLAR   | CFLAR  |
| hsa-miR-20b | CHD9    | CHD9    | -      |
| hsa-miR-20b | CHIC1   | CHIC1   | -      |
| hsa-miR-20b | -       | CHMP4C  | CHMP4C |
| hsa-miR-20b | CHRM2   | CHRM2   | -      |
| hsa-miR-20b | -       | CHRNA5  | CHRNA5 |
| hsa-miR-20b | CIC     | CIC     | -      |
| hsa-miR-20b | CIT     | CIT     | -      |
| hsa-miR-20b | -       | CLDN15  | CLDN15 |
| hsa-miR-20b | CLIP4   | CLIP4   | -      |
| hsa-miR-20b | CLOCK   | CLOCK   | -      |
| hsa-miR-20b | CMPK1   | CMPK1   | -      |
| hsa-miR-20b | -       | CNDP2   | CNDP2  |
| hsa-miR-20b | CNGB3   | CNGB3   | -      |
| hsa-miR-20b | CNOT6L  | CNOT6L  | -      |
| hsa-miR-20b | CNOT7   | CNOT7   | -      |
| hsa-miR-20b | COL19A1 | COL19A1 | -      |
| hsa-miR-20b | COL4A1  | COL4A1  | -      |
| hsa-miR-20b | -       | COMMD4  | COMMD4 |
| hsa-miR-20b | CORO2B  | CORO2B  | -      |
| hsa-miR-20b | COX7A2L | COX7A2L | -      |
| hsa-miR-20b | CPEB3   | CPEB3   | -      |
| hsa-miR-20b | -       | CPNE4   | CPNE4  |
| hsa-miR-20b | -       | CR1L    | CR1L   |

|             |            |            |         |
|-------------|------------|------------|---------|
| hsa-miR-20b | CRAMP1L    | CRAMP1L    | -       |
| hsa-miR-20b | CRCT1      | CRCT1      | -       |
| hsa-miR-20b | CREB5      | CREB5      | -       |
| hsa-miR-20b | CRIM1      | CRIM1      | -       |
| hsa-miR-20b | CRIPT      | CRIPT      | -       |
| hsa-miR-20b | CRK        | CRK        | -       |
| hsa-miR-20b | CRTC3      | CRTC3      | -       |
| hsa-miR-20b | CRY2       | CRY2       | -       |
| hsa-miR-20b | -          | CSF2RA     | CSF2RA  |
| hsa-miR-20b | CSGALNACT1 | CSGALNACT1 | -       |
| hsa-miR-20b | CSNK1G1    | CSNK1G1    | -       |
| hsa-miR-20b | CSRNP3     | CSRNP3     | -       |
| hsa-miR-20b | CTDSPL2    | CTDSPL2    | -       |
| hsa-miR-20b | -          | CUBN       | CUBN    |
| hsa-miR-20b | -          | CUL1       | CUL1    |
| hsa-miR-20b | CUL3       | CUL3       | -       |
| hsa-miR-20b | CX3CL1     | CX3CL1     | -       |
| hsa-miR-20b | CXCL14     | CXCL14     | -       |
| hsa-miR-20b | CYBB       | CYBB       | -       |
| hsa-miR-20b | CYBRD1     | CYBRD1     | -       |
| hsa-miR-20b | CYLD       | CYLD       | -       |
| hsa-miR-20b | CYP26B1    | CYP26B1    | -       |
| hsa-miR-20b | -          | CYP2W1     | CYP2W1  |
| hsa-miR-20b | DAB2       | DAB2       | -       |
| hsa-miR-20b | DAPK2      | DAPK2      | -       |
| hsa-miR-20b | DCAF8      | DCAF8      | -       |
| hsa-miR-20b | DCBLD2     | DCBLD2     | -       |
| hsa-miR-20b | -          | DCLRE1C    | DCLRE1C |
| hsa-miR-20b | DCUN1D3    | DCUN1D3    | -       |
| hsa-miR-20b | -          | DDOST      | DDOST   |
| hsa-miR-20b | DEDD       | DEDD       | -       |
| hsa-miR-20b | DEF8       | DEF8       | -       |
| hsa-miR-20b | DENND5B    | DENND5B    | -       |
| hsa-miR-20b | DERL2      | DERL2      | -       |
| hsa-miR-20b | -          | DHODH      | DHODH   |
| hsa-miR-20b | DIP2C      | DIP2C      | -       |
| hsa-miR-20b | DIRC2      | DIRC2      | -       |
| hsa-miR-20b | DLC1       | DLC1       | -       |
| hsa-miR-20b | -          | DMC1       | DMC1    |
| hsa-miR-20b | DMRTA2     | DMRTA2     | -       |
| hsa-miR-20b | DMTF1      | DMTF1      | -       |
| hsa-miR-20b | DNAJB6     | DNAJB6     | -       |
| hsa-miR-20b | DNAJB9     | DNAJB9     | -       |
| hsa-miR-20b | DNAJC16    | DNAJC16    | -       |
| hsa-miR-20b | DNAJC27    | DNAJC27    | -       |
| hsa-miR-20b | DNAL1      | DNAL1      | -       |
| hsa-miR-20b | DOCK4      | DOCK4      | -       |
| hsa-miR-20b | -          | DOPEY2     | DOPEY2  |
| hsa-miR-20b | DPF3       | DPF3       | -       |
| hsa-miR-20b | DPP3       | DPP3       | -       |
| hsa-miR-20b | DPYSL2     | DPYSL2     | -       |

|             |          |          |         |
|-------------|----------|----------|---------|
| hsa-miR-20b | DRD1     | DRD1     | -       |
| hsa-miR-20b | DSG4     | DSG4     | -       |
| hsa-miR-20b | -        | DTWD2    | DTWD2   |
| hsa-miR-20b | DUSP2    | DUSP2    | -       |
| hsa-miR-20b | DUSP8    | DUSP8    | -       |
| hsa-miR-20b | DYNC1LI2 | DYNC1LI2 | -       |
| hsa-miR-20b | -        | DYNLT1   | DYNLT1  |
| hsa-miR-20b | DYRK1A   | DYRK1A   | -       |
| hsa-miR-20b | -        | DYRK4    | DYRK4   |
| hsa-miR-20b | E2F1     | E2F1     | -       |
| hsa-miR-20b | E2F2     | E2F2     | -       |
| hsa-miR-20b | E2F3     | E2F3     | -       |
| hsa-miR-20b | -        | EDA      | EDA     |
| hsa-miR-20b | EEA1     | EEA1     | -       |
| hsa-miR-20b | EFNB1    | EFNB1    | -       |
| hsa-miR-20b | EGLN1    | EGLN1    | -       |
| hsa-miR-20b | EGLN3    | EGLN3    | -       |
| hsa-miR-20b | EGR2     | EGR2     | -       |
| hsa-miR-20b | EHD3     | EHD3     | -       |
| hsa-miR-20b | -        | EIF2AK4  | EIF2AK4 |
| hsa-miR-20b | EIF2C1   | EIF2C1   | -       |
| hsa-miR-20b | -        | EIF2C3   | EIF2C3  |
| hsa-miR-20b | EIF4G2   | EIF4G2   | -       |
| hsa-miR-20b | -        | EIF4G3   | EIF4G3  |
| hsa-miR-20b | EIF4H    | EIF4H    | -       |
| hsa-miR-20b | EIF5A2   | EIF5A2   | -       |
| hsa-miR-20b | ELAVL2   | ELAVL2   | -       |
| hsa-miR-20b | ELK3     | ELK3     | -       |
| hsa-miR-20b | ENPP5    | ENPP5    | -       |
| hsa-miR-20b | EPB41L5  | EPB41L5  | -       |
| hsa-miR-20b | EPHA4    | EPHA4    | -       |
| hsa-miR-20b | EPHA7    | EPHA7    | -       |
| hsa-miR-20b | EPHB4    | EPHB4    | -       |
| hsa-miR-20b | ERC1     | ERC1     | -       |
| hsa-miR-20b | EREG     | EREG     | -       |
| hsa-miR-20b | ERI1     | ERI1     | -       |
| hsa-miR-20b | ERO1LB   | ERO1LB   | -       |
| hsa-miR-20b | ETV1     | ETV1     | -       |
| hsa-miR-20b | EXPH5    | EXPH5    | -       |
| hsa-miR-20b | EZH1     | EZH1     | -       |
| hsa-miR-20b | F2R      | F2R      | -       |
| hsa-miR-20b | -        | F2RL1    | F2RL1   |
| hsa-miR-20b | F3       | F3       | -       |
| hsa-miR-20b | FAF2     | FAF2     | -       |
| hsa-miR-20b | FAM102A  | FAM102A  | -       |
| hsa-miR-20b | FAM117A  | FAM117A  | -       |
| hsa-miR-20b | FAM117B  | FAM117B  | -       |
| hsa-miR-20b | -        | FAM120B  | FAM120B |
| hsa-miR-20b | FAM123A  | FAM123A  | -       |
| hsa-miR-20b | FAM129A  | FAM129A  | -       |
| hsa-miR-20b | FAM129B  | FAM129B  | -       |

|             |          |          |        |
|-------------|----------|----------|--------|
| hsa-miR-20b | FAM131B  | FAM131B  | -      |
| hsa-miR-20b | FAM134A  | FAM134A  | -      |
| hsa-miR-20b | FAM134C  | FAM134C  | -      |
| hsa-miR-20b | FAM13A   | FAM13A   | -      |
| hsa-miR-20b | FAM13C   | FAM13C   | -      |
| hsa-miR-20b | FAM160B1 | FAM160B1 | -      |
| hsa-miR-20b | FAM189A1 | FAM189A1 | -      |
| hsa-miR-20b | FAM18B2  | FAM18B2  | -      |
| hsa-miR-20b | FAM190B  | FAM190B  | -      |
| hsa-miR-20b | FAM19A1  | FAM19A1  | -      |
| hsa-miR-20b | FAM3C    | FAM3C    | -      |
| hsa-miR-20b | -        | FAM40A   | FAM40A |
| hsa-miR-20b | FAM40B   | FAM40B   | -      |
| hsa-miR-20b | FAM45A   | FAM45A   | -      |
| hsa-miR-20b | FAM46C   | FAM46C   | -      |
| hsa-miR-20b | FAM57A   | FAM57A   | -      |
| hsa-miR-20b | FAM60A   | FAM60A   | -      |
| hsa-miR-20b | -        | FANCD2   | FANCD2 |
| hsa-miR-20b | FAT2     | FAT2     | -      |
| hsa-miR-20b | FAT4     | FAT4     | -      |
| hsa-miR-20b | -        | FBXL22   | FBXL22 |
| hsa-miR-20b | FBXL3    | FBXL3    | -      |
| hsa-miR-20b | FBXL5    | FBXL5    | -      |
| hsa-miR-20b | -        | FBXO18   | FBXO18 |
| hsa-miR-20b | FBXO21   | FBXO21   | -      |
| hsa-miR-20b | FBXO28   | FBXO28   | -      |
| hsa-miR-20b | FBXO31   | FBXO31   | -      |
| hsa-miR-20b | FBXO48   | FBXO48   | -      |
| hsa-miR-20b | -        | FBXO6    | FBXO6  |
| hsa-miR-20b | FBXW11   | FBXW11   | -      |
| hsa-miR-20b | FCHO2    | FCHO2    | -      |
| hsa-miR-20b | FEM1C    | FEM1C    | -      |
| hsa-miR-20b | FGD5     | FGD5     | -      |
| hsa-miR-20b | FGF5     | FGF5     | -      |
| hsa-miR-20b | -        | FGFR2    | FGFR2  |
| hsa-miR-20b | -        | FGL2     | FGL2   |
| hsa-miR-20b | -        | FHAD1    | FHAD1  |
| hsa-miR-20b | FIBIN    | FIBIN    | -      |
| hsa-miR-20b | FJX1     | FJX1     | -      |
| hsa-miR-20b | FLJ36031 | FLJ36031 | -      |
| hsa-miR-20b | FLT1     | FLT1     | -      |
| hsa-miR-20b | FNBP1L   | FNBP1L   | -      |
| hsa-miR-20b | FNDC3B   | FNDC3B   | -      |
| hsa-miR-20b | FOXA1    | FOXA1    | -      |
| hsa-miR-20b | FOXF1    | FOXF1    | -      |
| hsa-miR-20b | FOXJ2    | FOXJ2    | -      |
| hsa-miR-20b | FOXJ3    | FOXJ3    | -      |
| hsa-miR-20b | FOXK2    | FOXK2    | -      |
| hsa-miR-20b | FOXL2    | FOXL2    | -      |
| hsa-miR-20b | -        | FPR1     | FPR1   |
| hsa-miR-20b | FRMD4A   | FRMD4A   | -      |

|             |         |          |          |
|-------------|---------|----------|----------|
| hsa-miR-20b | FRMD4B  | FRMD4B   | -        |
| hsa-miR-20b | FRMD6   | FRMD6    | -        |
| hsa-miR-20b | FRS2    | FRS2     | -        |
| hsa-miR-20b | FTSJD1  | FTSJD1   | -        |
| hsa-miR-20b | FURIN   | FURIN    | -        |
| hsa-miR-20b | FXR1    | FXR1     | -        |
| hsa-miR-20b | FYCO1   | FYCO1    | -        |
| hsa-miR-20b | GAB1    | GAB1     | -        |
| hsa-miR-20b | GABBR1  | GABBR1   | -        |
| hsa-miR-20b | GABBR2  | GABBR2   | -        |
| hsa-miR-20b | GABPB1  | GABPB1   | -        |
| hsa-miR-20b | -       | GAK      | GAK      |
| hsa-miR-20b | GALNT4  | GALNT4   | -        |
| hsa-miR-20b | -       | GALNTL2  | GALNTL2  |
| hsa-miR-20b | -       | GATAD1   | GATAD1   |
| hsa-miR-20b | GATAD2B | GATAD2B  | -        |
| hsa-miR-20b | GBF1    | GBF1     | -        |
| hsa-miR-20b | GCC2    | GCC2     | -        |
| hsa-miR-20b | -       | GCNT4    | GCNT4    |
| hsa-miR-20b | GDA     | GDA      | -        |
| hsa-miR-20b | GDF11   | GDF11    | -        |
| hsa-miR-20b | -       | GDPD1    | GDPD1    |
| hsa-miR-20b | -       | GGT6     | GGT6     |
| hsa-miR-20b | GIGYF1  | GIGYF1   | -        |
| hsa-miR-20b | GIT2    | GIT2     | -        |
| hsa-miR-20b | -       | GKAP1    | GKAP1    |
| hsa-miR-20b | -       | GLA      | GLA      |
| hsa-miR-20b | -       | GLB1L    | GLB1L    |
| hsa-miR-20b | GLIS3   | GLIS3    | -        |
| hsa-miR-20b | GMCL1   | GMCL1    | -        |
| hsa-miR-20b | -       | GNL3L    | GNL3L    |
| hsa-miR-20b | GNPDA2  | GNPDA2   | -        |
| hsa-miR-20b | GNS     | GNS      | -        |
| hsa-miR-20b | GOLGA1  | GOLGA1   | -        |
| hsa-miR-20b | -       | GOLGA2   | GOLGA2   |
| hsa-miR-20b | GOSR1   | GOSR1    | -        |
| hsa-miR-20b | GPC6    | GPC6     | -        |
| hsa-miR-20b | GP2     | GP2      | -        |
| hsa-miR-20b | GPR133  | GPR133   | -        |
| hsa-miR-20b | GPR137B | GPR137B  | -        |
| hsa-miR-20b | GPR137C | GPR137C  | -        |
| hsa-miR-20b | -       | GPR157   | GPR157   |
| hsa-miR-20b | -       | GPR176   | GPR176   |
| hsa-miR-20b | -       | GPR82    | GPR82    |
| hsa-miR-20b | -       | GPR97    | GPR97    |
| hsa-miR-20b | GRHL2   | GRHL2    | -        |
| hsa-miR-20b | -       | GRIK3    | GRIK3    |
| hsa-miR-20b | -       | GRTP1    | GRTP1    |
| hsa-miR-20b | GTDC1   | GTDC1    | -        |
| hsa-miR-20b | -       | GTF2IRD2 | GTF2IRD2 |
| hsa-miR-20b | -       | GTPBP10  | GTPBP10  |

|             |         |           |           |
|-------------|---------|-----------|-----------|
| hsa-miR-20b | GUCY1A3 | GUCY1A3   | -         |
| hsa-miR-20b | HABP4   | HABP4     | -         |
| hsa-miR-20b | -       | HARS      | HARS      |
| hsa-miR-20b | HAS2    | HAS2      | -         |
| hsa-miR-20b | HAUS8   | HAUS8     | -         |
| hsa-miR-20b | HBP1    | HBP1      | -         |
| hsa-miR-20b | -       | HBXIP     | HBXIP     |
| hsa-miR-20b | HCN4    | HCN4      | -         |
| hsa-miR-20b | -       | HEATR2    | HEATR2    |
| hsa-miR-20b | HECA    | HECA      | -         |
| hsa-miR-20b | HECTD2  | HECTD2    | -         |
| hsa-miR-20b | HEG1    | HEG1      | -         |
| hsa-miR-20b | HIF1A   | HIF1A     | -         |
| hsa-miR-20b | HLF     | HLF       | -         |
| hsa-miR-20b | HMBOX1  | HMBOX1    | -         |
| hsa-miR-20b | HMGA2   | HMGA2     | -         |
| hsa-miR-20b | HMGB3   | HMGB3     | -         |
| hsa-miR-20b | -       | HMGCL     | HMGCL     |
| hsa-miR-20b | HN1     | HN1       | -         |
| hsa-miR-20b | -       | HNF4G     | HNF4G     |
| hsa-miR-20b | HOXB13  | HOXB13    | -         |
| hsa-miR-20b | HP1BP3  | HP1BP3    | -         |
| hsa-miR-20b | -       | HRH2      | HRH2      |
| hsa-miR-20b | HS2ST1  | HS2ST1    | -         |
| hsa-miR-20b | HS3ST5  | HS3ST5    | -         |
| hsa-miR-20b | -       | HSCB      | HSCB      |
| hsa-miR-20b | -       | HSD17B7P2 | HSD17B7P2 |
| hsa-miR-20b | HSPA8   | HSPA8     | -         |
| hsa-miR-20b | -       | ICAM4     | ICAM4     |
| hsa-miR-20b | IKZF4   | IKZF4     | -         |
| hsa-miR-20b | -       | IL23R     | IL23R     |
| hsa-miR-20b | IL25    | IL25      | -         |
| hsa-miR-20b | IL8     | IL8       | -         |
| hsa-miR-20b | -       | IMPAD1    | IMPAD1    |
| hsa-miR-20b | INO80   | INO80     | -         |
| hsa-miR-20b | INTS6   | INTS6     | -         |
| hsa-miR-20b | IP6K1   | IP6K1     | -         |
| hsa-miR-20b | IPO7    | IPO7      | -         |
| hsa-miR-20b | -       | IPP       | IPP       |
| hsa-miR-20b | IQSEC1  | IQSEC1    | -         |
| hsa-miR-20b | IQSEC2  | IQSEC2    | -         |
| hsa-miR-20b | IRAK4   | IRAK4     | -         |
| hsa-miR-20b | IRF1    | IRF1      | -         |
| hsa-miR-20b | IRF2BP2 | IRF2BP2   | -         |
| hsa-miR-20b | IRF9    | IRF9      | -         |
| hsa-miR-20b | ISM1    | ISM1      | -         |
| hsa-miR-20b | ISM2    | ISM2      | -         |
| hsa-miR-20b | ITCH    | ITCH      | -         |
| hsa-miR-20b | ITGA4   | ITGA4     | -         |
| hsa-miR-20b | -       | ITIH5     | ITIH5     |
| hsa-miR-20b | ITPKB   | ITPKB     | -         |

|             |          |          |          |
|-------------|----------|----------|----------|
| hsa-miR-20b | ITPR2    | ITPR2    | -        |
| hsa-miR-20b | ITPRIPL2 | ITPRIPL2 | -        |
| hsa-miR-20b | JAK1     | JAK1     | -        |
| hsa-miR-20b | JAZF1    | JAZF1    | -        |
| hsa-miR-20b | JOSD1    | JOSD1    | -        |
| hsa-miR-20b | JRKL     | JRKL     | -        |
| hsa-miR-20b | JUB      | JUB      | -        |
| hsa-miR-20b | KAT2B    | KAT2B    | -        |
| hsa-miR-20b | KCNJ10   | KCNJ10   | -        |
| hsa-miR-20b | KCNJ8    | KCNJ8    | -        |
| hsa-miR-20b | KCNK10   | KCNK10   | -        |
| hsa-miR-20b | KCNMA1   | KCNMA1   | -        |
| hsa-miR-20b | KDM2A    | KDM2A    | -        |
| hsa-miR-20b | KDM6B    | KDM6B    | -        |
| hsa-miR-20b | KIAA0226 | KIAA0226 | -        |
| hsa-miR-20b | KIAA0240 | KIAA0240 | -        |
| hsa-miR-20b | KIAA0247 | KIAA0247 | -        |
| hsa-miR-20b | KIAA0494 | KIAA0494 | -        |
| hsa-miR-20b | KIAA0513 | KIAA0513 | -        |
| hsa-miR-20b | KIAA0664 | KIAA0664 | -        |
| hsa-miR-20b | -        | KIAA0831 | KIAA0831 |
| hsa-miR-20b | KIAA1522 | KIAA1522 | -        |
| hsa-miR-20b | KIF23    | KIF23    | -        |
| hsa-miR-20b | KIF26B   | KIF26B   | -        |
| hsa-miR-20b | KIF3B    | KIF3B    | -        |
| hsa-miR-20b | KIF5A    | KIF5A    | -        |
| hsa-miR-20b | -        | KIF9     | KIF9     |
| hsa-miR-20b | -        | KLB      | KLB      |
| hsa-miR-20b | KLF10    | KLF10    | -        |
| hsa-miR-20b | KLF11    | KLF11    | -        |
| hsa-miR-20b | KLF12    | KLF12    | -        |
| hsa-miR-20b | KLF3     | KLF3     | -        |
| hsa-miR-20b | KLHL12   | KLHL12   | -        |
| hsa-miR-20b | KLHL15   | KLHL15   | -        |
| hsa-miR-20b | KLHL20   | KLHL20   | -        |
| hsa-miR-20b | KLHL28   | KLHL28   | -        |
| hsa-miR-20b | -        | KLHL5    | KLHL5    |
| hsa-miR-20b | KLRAQ1   | KLRAQ1   | -        |
| hsa-miR-20b | KPNA3    | KPNA3    | -        |
| hsa-miR-20b | KPNA4    | KPNA4    | -        |
| hsa-miR-20b | -        | KRBA2    | KRBA2    |
| hsa-miR-20b | -        | KREMEN1  | KREMEN1  |
| hsa-miR-20b | KRT81    | KRT81    | -        |
| hsa-miR-20b | L3MBTL3  | L3MBTL3  | -        |
| hsa-miR-20b | LACE1    | LACE1    | -        |
| hsa-miR-20b | -        | LALBA    | LALBA    |
| hsa-miR-20b | LASP1    | LASP1    | -        |
| hsa-miR-20b | LDLR     | LDLR     | -        |
| hsa-miR-20b | LDLRAD3  | LDLRAD3  | -        |
| hsa-miR-20b | LDLRAP1  | LDLRAP1  | -        |
| hsa-miR-20b | LHX6     | LHX6     | -        |

|             |         |          |          |
|-------------|---------|----------|----------|
| hsa-miR-20b | -       | LIAS     | LIAS     |
| hsa-miR-20b | LIF     | LIF      | -        |
| hsa-miR-20b | -       | LILRB1   | LILRB1   |
| hsa-miR-20b | LIMA1   | LIMA1    | -        |
| hsa-miR-20b | LIMK1   | LIMK1    | -        |
| hsa-miR-20b | LITAF   | LITAF    | -        |
| hsa-miR-20b | -       | LMO2     | LMO2     |
| hsa-miR-20b | LMO3    | LMO3     | -        |
| hsa-miR-20b | -       | LMOD3    | LMOD3    |
| hsa-miR-20b | LPGAT1  | LPGAT1   | -        |
| hsa-miR-20b | LRCH1   | LRCH1    | -        |
| hsa-miR-20b | LRIG1   | LRIG1    | -        |
| hsa-miR-20b | LRP1B   | LRP1B    | -        |
| hsa-miR-20b | LRP8    | LRP8     | -        |
| hsa-miR-20b | LRRC20  | LRRC20   | -        |
| hsa-miR-20b | -       | LRRC45   | LRRC45   |
| hsa-miR-20b | LRRC55  | LRRC55   | -        |
| hsa-miR-20b | -       | LRRK1    | LRRK1    |
| hsa-miR-20b | LYPD6   | LYPD6    | -        |
| hsa-miR-20b | LYSMD3  | LYSMD3   | -        |
| hsa-miR-20b | LYST    | LYST     | -        |
| hsa-miR-20b | M6PR    | M6PR     | -        |
| hsa-miR-20b | -       | MAGI3    | MAGI3    |
| hsa-miR-20b | MAP3K1  | MAP3K1   | -        |
| hsa-miR-20b | MAP3K11 | MAP3K11  | -        |
| hsa-miR-20b | MAP3K12 | MAP3K12  | -        |
| hsa-miR-20b | MAP3K13 | MAP3K13  | -        |
| hsa-miR-20b | MAP3K14 | MAP3K14  | -        |
| hsa-miR-20b | MAP3K2  | MAP3K2   | -        |
| hsa-miR-20b | MAP3K3  | MAP3K3   | -        |
| hsa-miR-20b | MAP3K5  | MAP3K5   | -        |
| hsa-miR-20b | -       | MAP3K7   | MAP3K7   |
| hsa-miR-20b | MAP3K8  | MAP3K8   | -        |
| hsa-miR-20b | -       | MAP4     | MAP4     |
| hsa-miR-20b | MAP7    | MAP7     | -        |
| hsa-miR-20b | MAPK4   | MAPK4    | -        |
| hsa-miR-20b | MAPRE1  | MAPRE1   | -        |
| hsa-miR-20b | MAPRE3  | MAPRE3   | -        |
| hsa-miR-20b | MARCH6  | MARCH6   | -        |
| hsa-miR-20b | MARCH8  | MARCH8   | -        |
| hsa-miR-20b | MARS    | MARS     | -        |
| hsa-miR-20b | -       | MARVELD3 | MARVELD3 |
| hsa-miR-20b | MAST3   | MAST3    | -        |
| hsa-miR-20b | MASTL   | MASTL    | -        |
| hsa-miR-20b | MAT2B   | MAT2B    | -        |
| hsa-miR-20b | MBD5    | MBD5     | -        |
| hsa-miR-20b | MBTPS1  | MBTPS1   | -        |
| hsa-miR-20b | MCC     | MCC      | -        |
| hsa-miR-20b | MCF2L   | MCF2L    | -        |
| hsa-miR-20b | -       | MCHR2    | MCHR2    |
| hsa-miR-20b | MCL1    | MCL1     | -        |



|             |         |         |         |
|-------------|---------|---------|---------|
| hsa-miR-20b | MED12L  | MED12L  | -       |
| hsa-miR-20b | MED17   | MED17   | -       |
| hsa-miR-20b | -       | MED6    | MED6    |
| hsa-miR-20b | MEX3D   | MEX3D   | -       |
| hsa-miR-20b | MFAP3L  | MFAP3L  | -       |
| hsa-miR-20b | -       | MFAP5   | MFAP5   |
| hsa-miR-20b | MFN2    | MFN2    | -       |
| hsa-miR-20b | -       | MFSD8   | MFSD8   |
| hsa-miR-20b | MGEA5   | MGEA5   | -       |
| hsa-miR-20b | MGLL    | MGLL    | -       |
| hsa-miR-20b | -       | MICA    | MICA    |
| hsa-miR-20b | MICAL3  | MICAL3  | -       |
| hsa-miR-20b | MID1    | MID1    | -       |
| hsa-miR-20b | MIDN    | MIDN    | -       |
| hsa-miR-20b | MIER2   | MIER2   | -       |
| hsa-miR-20b | MINK1   | MINK1   | -       |
| hsa-miR-20b | -       | MKL1    | MKL1    |
| hsa-miR-20b | MKL2    | MKL2    | -       |
| hsa-miR-20b | MKNK2   | MKNK2   | -       |
| hsa-miR-20b | MKRN1   | MKRN1   | -       |
| hsa-miR-20b | MLL     | MLL     | -       |
| hsa-miR-20b | MLL3    | MLL3    | -       |
| hsa-miR-20b | MLL4    | MLL4    | -       |
| hsa-miR-20b | MMP2    | MMP2    | -       |
| hsa-miR-20b | MMP24   | MMP24   | -       |
| hsa-miR-20b | -       | MMP3    | MMP3    |
| hsa-miR-20b | -       | MOG     | MOG     |
| hsa-miR-20b | -       | MOGAT3  | MOGAT3  |
| hsa-miR-20b | MORF4L1 | MORF4L1 | -       |
| hsa-miR-20b | MPDZ    | MPDZ    | -       |
| hsa-miR-20b | -       | MR1     | MR1     |
| hsa-miR-20b | -       | MRPL24  | MRPL24  |
| hsa-miR-20b | -       | MRRF    | MRRF    |
| hsa-miR-20b | -       | MSH3    | MSH3    |
| hsa-miR-20b | MSL1    | MSL1    | -       |
| hsa-miR-20b | MTF1    | MTF1    | -       |
| hsa-miR-20b | MTMR3   | MTMR3   | -       |
| hsa-miR-20b | MXD1    | MXD1    | -       |
| hsa-miR-20b | MYCL1   | MYCL1   | -       |
| hsa-miR-20b | MYF5    | MYF5    | -       |
| hsa-miR-20b | MYNN    | MYNN    | -       |
| hsa-miR-20b | MYO1D   | MYO1D   | -       |
| hsa-miR-20b | -       | MYO3A   | MYO3A   |
| hsa-miR-20b | MYO5B   | MYO5B   | -       |
| hsa-miR-20b | -       | MYPN    | MYPN    |
| hsa-miR-20b | MYT1L   | MYT1L   | -       |
| hsa-miR-20b | NAA30   | NAA30   | -       |
| hsa-miR-20b | NAGK    | NAGK    | -       |
| hsa-miR-20b | -       | NALCN   | NALCN   |
| hsa-miR-20b | -       | NANOGP1 | NANOGP1 |
| hsa-miR-20b | NANOS1  | NANOS1  | -       |

|             |         |         |        |
|-------------|---------|---------|--------|
| hsa-miR-20b | NAPEPLD | NAPEPLD | -      |
| hsa-miR-20b | NAV2    | NAV2    | -      |
| hsa-miR-20b | NBEA    | NBEA    | -      |
| hsa-miR-20b | NBEAL1  | NBEAL1  | -      |
| hsa-miR-20b | NBL1    | NBL1    | -      |
| hsa-miR-20b | -       | NCAPD2  | NCAPD2 |
| hsa-miR-20b | NCEH1   | NCEH1   | -      |
| hsa-miR-20b | -       | NCF2    | NCF2   |
| hsa-miR-20b | NCKAP5  | NCKAP5  | -      |
| hsa-miR-20b | NCOA3   | NCOA3   | -      |
| hsa-miR-20b | NDEL1   | NDEL1   | -      |
| hsa-miR-20b | -       | NDUFC2  | NDUFC2 |
| hsa-miR-20b | NEDD4L  | NEDD4L  | -      |
| hsa-miR-20b | NEK9    | NEK9    | -      |
| hsa-miR-20b | NEURL1B | NEURL1B | -      |
| hsa-miR-20b | NEUROG1 | NEUROG1 | -      |
| hsa-miR-20b | -       | NF2     | NF2    |
| hsa-miR-20b | NFAT5   | NFAT5   | -      |
| hsa-miR-20b | -       | NFATC3  | NFATC3 |
| hsa-miR-20b | NFIB    | NFIB    | -      |
| hsa-miR-20b | -       | NFX1    | NFX1   |
| hsa-miR-20b | NHLH1   | NHLH1   | -      |
| hsa-miR-20b | NHLRC3  | NHLRC3  | -      |
| hsa-miR-20b | NIN     | NIN     | -      |
| hsa-miR-20b | NKIRAS1 | NKIRAS1 | -      |
| hsa-miR-20b | NKX2-2  | NKX2-2  | -      |
| hsa-miR-20b | NKX3-2  | NKX3-2  | -      |
| hsa-miR-20b | NOL4    | NOL4    | -      |
| hsa-miR-20b | NPAS2   | NPAS2   | -      |
| hsa-miR-20b | NPAT    | NPAT    | -      |
| hsa-miR-20b | NR2C1   | NR2C1   | -      |
| hsa-miR-20b | NR2C2   | NR2C2   | -      |
| hsa-miR-20b | NR4A2   | NR4A2   | -      |
| hsa-miR-20b | NR4A3   | NR4A3   | -      |
| hsa-miR-20b | -       | NRBP1   | NRBP1  |
| hsa-miR-20b | NRIP3   | NRIP3   | -      |
| hsa-miR-20b | NRP2    | NRP2    | -      |
| hsa-miR-20b | NRSN1   | NRSN1   | -      |
| hsa-miR-20b | NTN4    | NTN4    | -      |
| hsa-miR-20b | NTRK3   | NTRK3   | -      |
| hsa-miR-20b | NUFIP2  | NUFIP2  | -      |
| hsa-miR-20b | NUP35   | NUP35   | -      |
| hsa-miR-20b | OBFC2A  | OBFC2A  | -      |
| hsa-miR-20b | OCRL    | OCRL    | -      |
| hsa-miR-20b | ODZ1    | ODZ1    | -      |
| hsa-miR-20b | ORAI1   | ORAI1   | -      |
| hsa-miR-20b | ORMDL3  | ORMDL3  | -      |
| hsa-miR-20b | OSBPL5  | OSBPL5  | -      |
| hsa-miR-20b | OSM     | OSM     | -      |
| hsa-miR-20b | OSR1    | OSR1    | -      |
| hsa-miR-20b | -       | OTOG    | OTOG   |

|             |          |          |         |
|-------------|----------|----------|---------|
| hsa-miR-20b | OTUD1    | OTUD1    | -       |
| hsa-miR-20b | OTUD3    | OTUD3    | -       |
| hsa-miR-20b | OXR1     | OXR1     | -       |
| hsa-miR-20b | P2RX4    | P2RX4    | -       |
| hsa-miR-20b | -        | P2RX7    | P2RX7   |
| hsa-miR-20b | -        | PAF1     | PAF1    |
| hsa-miR-20b | PAFAH1B1 | PAFAH1B1 | -       |
| hsa-miR-20b | PAFAH1B2 | PAFAH1B2 | -       |
| hsa-miR-20b | PAK7     | PAK7     | -       |
| hsa-miR-20b | PANK3    | PANK3    | -       |
| hsa-miR-20b | PANX2    | PANX2    | -       |
| hsa-miR-20b | PAPOLA   | PAPOLA   | -       |
| hsa-miR-20b | PAPOLB   | PAPOLB   | -       |
| hsa-miR-20b | PARD6B   | PARD6B   | -       |
| hsa-miR-20b | -        | PARP1    | PARP1   |
| hsa-miR-20b | -        | PBLD     | PBLD    |
| hsa-miR-20b | PBX3     | PBX3     | -       |
| hsa-miR-20b | PCBP2    | PCBP2    | -       |
| hsa-miR-20b | PCDHA1   | PCDHA1   | -       |
| hsa-miR-20b | PCDHA10  | PCDHA10  | -       |
| hsa-miR-20b | PCDHA11  | PCDHA11  | -       |
| hsa-miR-20b | PCDHA12  | PCDHA12  | -       |
| hsa-miR-20b | PCDHA13  | PCDHA13  | -       |
| hsa-miR-20b | PCDHA2   | PCDHA2   | -       |
| hsa-miR-20b | PCDHA3   | PCDHA3   | -       |
| hsa-miR-20b | PCDHA4   | PCDHA4   | -       |
| hsa-miR-20b | PCDHA5   | PCDHA5   | -       |
| hsa-miR-20b | PCDHA6   | PCDHA6   | -       |
| hsa-miR-20b | PCDHA7   | PCDHA7   | -       |
| hsa-miR-20b | PCDHA8   | PCDHA8   | -       |
| hsa-miR-20b | PCDHA9   | PCDHA9   | -       |
| hsa-miR-20b | PCDHAC1  | PCDHAC1  | -       |
| hsa-miR-20b | PCDHAC2  | PCDHAC2  | -       |
| hsa-miR-20b | PCMTD1   | PCMTD1   | -       |
| hsa-miR-20b | PDCD1LG2 | PDCD1LG2 | -       |
| hsa-miR-20b | PDE3B    | PDE3B    | -       |
| hsa-miR-20b | PDGFRA   | PDGFRA   | -       |
| hsa-miR-20b | PDLIM5   | PDLIM5   | -       |
| hsa-miR-20b | PDPR     | PDPR     | -       |
| hsa-miR-20b | -        | PECR     | PECR    |
| hsa-miR-20b | PEX5L    | PEX5L    | -       |
| hsa-miR-20b | -        | PF4V1    | PF4V1   |
| hsa-miR-20b | PFKFB3   | PFKFB3   | -       |
| hsa-miR-20b | PFN2     | PFN2     | -       |
| hsa-miR-20b | PGAP1    | PGAP1    | -       |
| hsa-miR-20b | PGBD5    | PGBD5    | -       |
| hsa-miR-20b | PGM2L1   | PGM2L1   | -       |
| hsa-miR-20b | PGP      | PGP      | -       |
| hsa-miR-20b | -        | PHACTR4  | PHACTR4 |
| hsa-miR-20b | PHF1     | PHF1     | -       |
| hsa-miR-20b | -        | PHF12    | PHF12   |

|             |          |          |          |
|-------------|----------|----------|----------|
| hsa-miR-20b | PHF6     | PHF6     | -        |
| hsa-miR-20b | PHIP     | PHIP     | -        |
| hsa-miR-20b | -        | PHLDB3   | PHLDB3   |
| hsa-miR-20b | PHLPP2   | PHLPP2   | -        |
| hsa-miR-20b | PHTF2    | PHTF2    | -        |
| hsa-miR-20b | -        | PIGM     | PIGM     |
| hsa-miR-20b | -        | PIGO     | PIGO     |
| hsa-miR-20b | PIKFYVE  | PIKFYVE  | -        |
| hsa-miR-20b | PIP4K2A  | PIP4K2A  | -        |
| hsa-miR-20b | PIP4K2C  | PIP4K2C  | -        |
| hsa-miR-20b | PITPNA   | PITPNA   | -        |
| hsa-miR-20b | -        | PIWIL2   | PIWIL2   |
| hsa-miR-20b | PKD1     | PKD1     | -        |
| hsa-miR-20b | PKD2     | PKD2     | -        |
| hsa-miR-20b | PKIA     | PKIA     | -        |
| hsa-miR-20b | -        | PKMYT1   | PKMYT1   |
| hsa-miR-20b | PKN2     | PKN2     | -        |
| hsa-miR-20b | PKNOX1   | PKNOX1   | -        |
| hsa-miR-20b | PLA2G6   | PLA2G6   | -        |
| hsa-miR-20b | -        | PLAC1    | PLAC1    |
| hsa-miR-20b | PLAG1    | PLAG1    | -        |
| hsa-miR-20b | PLAGL2   | PLAGL2   | -        |
| hsa-miR-20b | -        | PLAUR    | PLAUR    |
| hsa-miR-20b | PLCB1    | PLCB1    | -        |
| hsa-miR-20b | PLCXD3   | PLCXD3   | -        |
| hsa-miR-20b | PLEKHA3  | PLEKHA3  | -        |
| hsa-miR-20b | PLEKHG1  | PLEKHG1  | -        |
| hsa-miR-20b | -        | PLEKHG6  | PLEKHG6  |
| hsa-miR-20b | PLEKHM1  | -        | PLEKHM1  |
| hsa-miR-20b | PLEKHO2  | PLEKHO2  | -        |
| hsa-miR-20b | PLS1     | PLS1     | -        |
| hsa-miR-20b | PLSCR4   | PLSCR4   | -        |
| hsa-miR-20b | PLXNA1   | PLXNA1   | -        |
| hsa-miR-20b | -        | PNLIPRP1 | PNLIPRP1 |
| hsa-miR-20b | -        | POFUT1   | POFUT1   |
| hsa-miR-20b | POLR3G   | POLR3G   | -        |
| hsa-miR-20b | -        | PON2     | PON2     |
| hsa-miR-20b | POU6F1   | -        | POU6F1   |
| hsa-miR-20b | -        | PPA2     | PPA2     |
| hsa-miR-20b | PPARD    | -        | PPARD    |
| hsa-miR-20b | PPARGC1B | PPARGC1B | -        |
| hsa-miR-20b | PPM1A    | PPM1A    | -        |
| hsa-miR-20b | PPP1R15B | PPP1R15B | -        |
| hsa-miR-20b | PPP1R3B  | PPP1R3B  | -        |
| hsa-miR-20b | PPP2CA   | PPP2CA   | -        |
| hsa-miR-20b | PPP2R2A  | PPP2R2A  | -        |
| hsa-miR-20b | PPP2R3A  | PPP2R3A  | -        |
| hsa-miR-20b | PPP6C    | PPP6C    | -        |
| hsa-miR-20b | -        | PQLC2    | PQLC2    |
| hsa-miR-20b | -        | PRAP1    | PRAP1    |
| hsa-miR-20b | PRDM10   | PRDM10   | -        |

|             |           |           |         |
|-------------|-----------|-----------|---------|
| hsa-miR-20b | PRDM2     | PRDM2     | -       |
| hsa-miR-20b | PREX1     | PREX1     | -       |
| hsa-miR-20b | PRKACB    | PRKACB    | -       |
| hsa-miR-20b | -         | PRPF4     | PRPF4   |
| hsa-miR-20b | -         | PRR11     | PRR11   |
| hsa-miR-20b | PRR15     | PRR15     | -       |
| hsa-miR-20b | PRR16     | PRR16     | -       |
| hsa-miR-20b | PRRG1     | PRRG1     | -       |
| hsa-miR-20b | PRRX1     | PRRX1     | -       |
| hsa-miR-20b | PSD       | PSD       | -       |
| hsa-miR-20b | -         | PSMC6     | PSMC6   |
| hsa-miR-20b | PTEN      | PTEN      | -       |
| hsa-miR-20b | PTGDR     | PTGDR     | -       |
| hsa-miR-20b | -         | PTGER4    | PTGER4  |
| hsa-miR-20b | PTGFRN    | PTGFRN    | -       |
| hsa-miR-20b | PTHLH     | PTHLH     | -       |
| hsa-miR-20b | PTP4A2    | PTP4A2    | -       |
| hsa-miR-20b | PTPDC1    | PTPDC1    | -       |
| hsa-miR-20b | PTPN21    | PTPN21    | -       |
| hsa-miR-20b | PTPN3     | PTPN3     | -       |
| hsa-miR-20b | PTPRD     | PTPRD     | -       |
| hsa-miR-20b | -         | PTPRF     | PTPRF   |
| hsa-miR-20b | PTPRJ     | PTPRJ     | -       |
| hsa-miR-20b | PTPRO     | PTPRO     | -       |
| hsa-miR-20b | PURA      | PURA      | -       |
| hsa-miR-20b | PURB      | PURB      | -       |
| hsa-miR-20b | QKI       | QKI       | -       |
| hsa-miR-20b | -         | QPRT      | QPRT    |
| hsa-miR-20b | RAB10     | RAB10     | -       |
| hsa-miR-20b | RAB11FIP1 | RAB11FIP1 | -       |
| hsa-miR-20b | RAB11FIP5 | RAB11FIP5 | -       |
| hsa-miR-20b | RAB12     | RAB12     | -       |
| hsa-miR-20b | RAB5B     | RAB5B     | -       |
| hsa-miR-20b | RAB8B     | RAB8B     | -       |
| hsa-miR-20b | RABEP1    | RABEP1    | -       |
| hsa-miR-20b | RACGAP1   | RACGAP1   | -       |
| hsa-miR-20b | RAD23B    | RAD23B    | -       |
| hsa-miR-20b | -         | RAG1AP1   | RAG1AP1 |
| hsa-miR-20b | RANBP6    | RANBP6    | -       |
| hsa-miR-20b | RAP2C     | RAP2C     | -       |
| hsa-miR-20b | RAPGEF2   | RAPGEF2   | -       |
| hsa-miR-20b | RAPGEF4   | RAPGEF4   | -       |
| hsa-miR-20b | RAPGEF5   | -         | RAPGEF5 |
| hsa-miR-20b | RAPGEFL1  | RAPGEFL1  | -       |
| hsa-miR-20b | RARB      | RARB      | -       |
| hsa-miR-20b | RASD1     | RASD1     | -       |
| hsa-miR-20b | RASGEF1A  | RASGEF1A  | -       |
| hsa-miR-20b | RASL11B   | RASL11B   | -       |
| hsa-miR-20b | RASL12    | RASL12    | -       |
| hsa-miR-20b | RASSF2    | RASSF2    | -       |
| hsa-miR-20b | -         | RASSF8    | RASSF8  |

|             |         |         |         |
|-------------|---------|---------|---------|
| hsa-miR-20b | RB1     | RB1     | -       |
| hsa-miR-20b | RB1CC1  | RB1CC1  | -       |
| hsa-miR-20b | RBL1    | RBL1    | -       |
| hsa-miR-20b | RBL2    | RBL2    | -       |
| hsa-miR-20b | RBM15B  | RBM15B  | -       |
| hsa-miR-20b | RBM20   | RBM20   | -       |
| hsa-miR-20b | RBM24   | RBM24   | -       |
| hsa-miR-20b | RBMS1   | RBMS1   | -       |
| hsa-miR-20b | RBMS2   | RBMS2   | -       |
| hsa-miR-20b | -       | RCCD1   | RCCD1   |
| hsa-miR-20b | REEP3   | REEP3   | -       |
| hsa-miR-20b | -       | REL     | REL     |
| hsa-miR-20b | RELL1   | RELL1   | -       |
| hsa-miR-20b | REPS2   | REPS2   | -       |
| hsa-miR-20b | RGL1    | RGL1    | -       |
| hsa-miR-20b | RGMA    | RGMA    | -       |
| hsa-miR-20b | RGMB    | RGMB    | -       |
| hsa-miR-20b | RGNEF   | RGNEF   | -       |
| hsa-miR-20b | RHO     | RHO     | -       |
| hsa-miR-20b | RHOC    | RHOC    | -       |
| hsa-miR-20b | -       | RIMS1   | RIMS1   |
| hsa-miR-20b | -       | RMND1   | RMND1   |
| hsa-miR-20b | RND3    | RND3    | -       |
| hsa-miR-20b | -       | RNF125  | RNF125  |
| hsa-miR-20b | RNF128  | RNF128  | -       |
| hsa-miR-20b | RNF2    | RNF2    | -       |
| hsa-miR-20b | RNF38   | RNF38   | -       |
| hsa-miR-20b | RNF6    | RNF6    | -       |
| hsa-miR-20b | -       | RNH1    | RNH1    |
| hsa-miR-20b | -       | RNMTL1  | RNMTL1  |
| hsa-miR-20b | RORC    | RORC    | -       |
| hsa-miR-20b | RPA2    | RPA2    | -       |
| hsa-miR-20b | RPS6KA1 | RPS6KA1 | -       |
| hsa-miR-20b | RPS6KA2 | RPS6KA2 | -       |
| hsa-miR-20b | RPS6KA3 | -       | RPS6KA3 |
| hsa-miR-20b | RPS6KA5 | RPS6KA5 | -       |
| hsa-miR-20b | RRAGD   | RRAGD   | -       |
| hsa-miR-20b | RRM2    | RRM2    | -       |
| hsa-miR-20b | RSBN1   | RSBN1   | -       |
| hsa-miR-20b | RSRC2   | RSRC2   | -       |
| hsa-miR-20b | RUFY2   | RUFY2   | -       |
| hsa-miR-20b | RUNDC1  | RUNDC1  | -       |
| hsa-miR-20b | -       | RUNDC2A | RUNDC2A |
| hsa-miR-20b | -       | RUNDC2B | RUNDC2B |
| hsa-miR-20b | RUNX1   | RUNX1   | -       |
| hsa-miR-20b | RUNX3   | RUNX3   | -       |
| hsa-miR-20b | RYBP    | RYBP    | -       |
| hsa-miR-20b | S1PR1   | S1PR1   | -       |
| hsa-miR-20b | SALL1   | SALL1   | -       |
| hsa-miR-20b | SAMD12  | SAMD12  | -       |
| hsa-miR-20b | SAMD8   | SAMD8   | -       |

|             |          |          |         |
|-------------|----------|----------|---------|
| hsa-miR-20b | SAR1B    | SAR1B    | -       |
| hsa-miR-20b | -        | SART1    | SART1   |
| hsa-miR-20b | SASH1    | SASH1    | -       |
| hsa-miR-20b | SCD5     | SCD5     | -       |
| hsa-miR-20b | -        | SCIN     | SCIN    |
| hsa-miR-20b | SCML2    | SCML2    | -       |
| hsa-miR-20b | -        | SCN11A   | SCN11A  |
| hsa-miR-20b | SCN1A    | SCN1A    | -       |
| hsa-miR-20b | SCN2A    | SCN2A    | -       |
| hsa-miR-20b | SEMA4B   | SEMA4B   | -       |
| hsa-miR-20b | SEMA4G   | SEMA4G   | -       |
| hsa-miR-20b | SEMA7A   | SEMA7A   | -       |
| hsa-miR-20b | SENP5    | SENP5    | -       |
| hsa-miR-20b | SEPT2    | SEPT2    | -       |
| hsa-miR-20b | SERP1    | SERP1    | -       |
| hsa-miR-20b | SERTAD2  | SERTAD2  | -       |
| hsa-miR-20b | SESN2    | SESN2    | -       |
| hsa-miR-20b | -        | SFPQ     | SFPQ    |
| hsa-miR-20b | SFXN5    | SFXN5    | -       |
| hsa-miR-20b | -        | SGCE     | SGCE    |
| hsa-miR-20b | SGTB     | SGTB     | -       |
| hsa-miR-20b | -        | SH2D3A   | SH2D3A  |
| hsa-miR-20b | SH2D5    | SH2D5    | -       |
| hsa-miR-20b | SH3BP5   | SH3BP5   | -       |
| hsa-miR-20b | SH3PXD2A | SH3PXD2A | -       |
| hsa-miR-20b | SHANK2   | SHANK2   | -       |
| hsa-miR-20b | SHOC2    | SHOC2    | -       |
| hsa-miR-20b | SIK1     | SIK1     | -       |
| hsa-miR-20b | SIKE1    | SIKE1    | -       |
| hsa-miR-20b | SIPA1L3  | SIPA1L3  | -       |
| hsa-miR-20b | SIRPA    | SIRPA    | -       |
| hsa-miR-20b | SIRT7    | -        | SIRT7   |
| hsa-miR-20b | SKI      | SKI      | -       |
| hsa-miR-20b | SLAIN2   | SLAIN2   | -       |
| hsa-miR-20b | SLC11A1  | SLC11A1  | -       |
| hsa-miR-20b | SLC16A9  | SLC16A9  | -       |
| hsa-miR-20b | SLC17A7  | SLC17A7  | -       |
| hsa-miR-20b | SLC22A23 | SLC22A23 | -       |
| hsa-miR-20b | SLC24A4  | SLC24A4  | -       |
| hsa-miR-20b | SLC25A27 | SLC25A27 | -       |
| hsa-miR-20b | SLC25A36 | SLC25A36 | -       |
| hsa-miR-20b | -        | SLC28A2  | SLC28A2 |
| hsa-miR-20b | SLC29A2  | SLC29A2  | -       |
| hsa-miR-20b | -        | SLC2A11  | SLC2A11 |
| hsa-miR-20b | SLC2A4   | SLC2A4   | -       |
| hsa-miR-20b | SLC30A3  | SLC30A3  | -       |
| hsa-miR-20b | SLC30A7  | SLC30A7  | -       |
| hsa-miR-20b | -        | SLC35E2  | SLC35E2 |
| hsa-miR-20b | -        | SLC35F5  | SLC35F5 |
| hsa-miR-20b | SLC39A6  | SLC39A6  | -       |
| hsa-miR-20b | SLC39A9  | SLC39A9  | -       |

|             |            |            |        |
|-------------|------------|------------|--------|
| hsa-miR-20b | SLC41A1    | SLC41A1    | -      |
| hsa-miR-20b | SLC45A4    | SLC45A4    | -      |
| hsa-miR-20b | SLC48A1    | SLC48A1    | -      |
| hsa-miR-20b | SLC4A4     | SLC4A4     | -      |
| hsa-miR-20b | SLC4A7     | SLC4A7     | -      |
| hsa-miR-20b | SLC6A9     | SLC6A9     | -      |
| hsa-miR-20b | SLC7A2     | SLC7A2     | -      |
| hsa-miR-20b | SLC9A2     | SLC9A2     | -      |
| hsa-miR-20b | SLITRK2    | SLITRK2    | -      |
| hsa-miR-20b | SLITRK3    | SLITRK3    | -      |
| hsa-miR-20b | -          | SLMAP      | SLMAP  |
| hsa-miR-20b | SMAD4      | SMAD4      | -      |
| hsa-miR-20b | SMAD5      | SMAD5      | -      |
| hsa-miR-20b | SMAD6      | SMAD6      | -      |
| hsa-miR-20b | SMAD7      | SMAD7      | -      |
| hsa-miR-20b | SMOC1      | SMOC1      | -      |
| hsa-miR-20b | SMOC2      | SMOC2      | -      |
| hsa-miR-20b | -          | SNAPC4     | SNAPC4 |
| hsa-miR-20b | -          | SNRPD3     | SNRPD3 |
| hsa-miR-20b | SNX16      | SNX16      | -      |
| hsa-miR-20b | SNX21      | SNX21      | -      |
| hsa-miR-20b | -          | SNX22      | SNX22  |
| hsa-miR-20b | SNX9       | SNX9       | -      |
| hsa-miR-20b | SOBP       | SOBP       | -      |
| hsa-miR-20b | SOCS6      | SOCS6      | -      |
| hsa-miR-20b | SOCS7      | SOCS7      | -      |
| hsa-miR-20b | SOLH       | SOLH       | -      |
| hsa-miR-20b | SOS1       | SOS1       | -      |
| hsa-miR-20b | SOX4       | SOX4       | -      |
| hsa-miR-20b | -          | SPACA4     | SPACA4 |
| hsa-miR-20b | -          | SPATS2     | SPATS2 |
| hsa-miR-20b | SPG20      | SPG20      | -      |
| hsa-miR-20b | -          | SPIRE2     | SPIRE2 |
| hsa-miR-20b | SPOPL      | SPOPL      | -      |
| hsa-miR-20b | SPRED1     | SPRED1     | -      |
| hsa-miR-20b | -          | SPTLC1     | SPTLC1 |
| hsa-miR-20b | SQSTM1     | SQSTM1     | -      |
| hsa-miR-20b | SRCIN1     | SRCIN1     | -      |
| hsa-miR-20b | SRGAP1     | SRGAP1     | -      |
| hsa-miR-20b | SRPK2      | SRPK2      | -      |
| hsa-miR-20b | SS18L1     | SS18L1     | -      |
| hsa-miR-20b | SSH1       | SSH1       | -      |
| hsa-miR-20b | SSH2       | SSH2       | -      |
| hsa-miR-20b | SSX2IP     | SSX2IP     | -      |
| hsa-miR-20b | ST3GAL1    | ST3GAL1    | -      |
| hsa-miR-20b | ST6GALNAC3 | ST6GALNAC3 | -      |
| hsa-miR-20b | ST6GALNAC6 | ST6GALNAC6 | -      |
| hsa-miR-20b | ST8SIA2    | ST8SIA2    | -      |
| hsa-miR-20b | STC1       | STC1       | -      |
| hsa-miR-20b | STK11      | STK11      | -      |
| hsa-miR-20b | STK38      | STK38      | -      |



|             |          |          |         |
|-------------|----------|----------|---------|
| hsa-miR-20b | -        | STRBP    | STRBP   |
| hsa-miR-20b | STX6     | STX6     | -       |
| hsa-miR-20b | STXBP5   | STXBP5   | -       |
| hsa-miR-20b | STYX     | STYX     | -       |
| hsa-miR-20b | SULF1    | SULF1    | -       |
| hsa-miR-20b | SUMF1    | SUMF1    | -       |
| hsa-miR-20b | SV2B     | SV2B     | -       |
| hsa-miR-20b | SYAP1    | SYAP1    | -       |
| hsa-miR-20b | SYNE1    | SYNE1    | -       |
| hsa-miR-20b | SYNM     | SYNM     | -       |
| hsa-miR-20b | SYNRG    | SYNRG    | -       |
| hsa-miR-20b | SYTL4    | SYTL4    | -       |
| hsa-miR-20b | TACC1    | TACC1    | -       |
| hsa-miR-20b | TAGAP    | TAGAP    | -       |
| hsa-miR-20b | TANC1    | TANC1    | -       |
| hsa-miR-20b | TANC2    | TANC2    | -       |
| hsa-miR-20b | TAOK3    | TAOK3    | -       |
| hsa-miR-20b | TAPT1    | TAPT1    | -       |
| hsa-miR-20b | TBC1D10C | TBC1D10C | -       |
| hsa-miR-20b | TBC1D15  | TBC1D15  | -       |
| hsa-miR-20b | TBC1D17  | -        | TBC1D17 |
| hsa-miR-20b | -        | TBC1D2   | TBC1D2  |
| hsa-miR-20b | TBC1D20  | TBC1D20  | -       |
| hsa-miR-20b | TBC1D8B  | TBC1D8B  | -       |
| hsa-miR-20b | TBC1D9   | TBC1D9   | -       |
| hsa-miR-20b | TBL1X    | TBL1X    | -       |
| hsa-miR-20b | -        | TBL3     | TBL3    |
| hsa-miR-20b | -        | TBX19    | TBX19   |
| hsa-miR-20b | TBX3     | TBX3     | -       |
| hsa-miR-20b | -        | TCEAL7   | TCEAL7  |
| hsa-miR-20b | TCEB3    | TCEB3    | -       |
| hsa-miR-20b | TCF4     | TCF4     | -       |
| hsa-miR-20b | TCF7L1   | TCF7L1   | -       |
| hsa-miR-20b | -        | TCFL5    | TCFL5   |
| hsa-miR-20b | TCTEX1D1 | TCTEX1D1 | -       |
| hsa-miR-20b | -        | TESC     | TESC    |
| hsa-miR-20b | TET1     | TET1     | -       |
| hsa-miR-20b | TET2     | TET2     | -       |
| hsa-miR-20b | TET3     | TET3     | -       |
| hsa-miR-20b | TGFBR2   | TGFBR2   | -       |
| hsa-miR-20b | TGOLN2   | TGOLN2   | -       |
| hsa-miR-20b | THRA     | THRA     | -       |
| hsa-miR-20b | TIAM1    | TIAM1    | -       |
| hsa-miR-20b | TIMM17A  | TIMM17A  | -       |
| hsa-miR-20b | TIMP2    | TIMP2    | -       |
| hsa-miR-20b | -        | TLN1     | TLN1    |
| hsa-miR-20b | TMBIM6   | TMBIM6   | -       |
| hsa-miR-20b | -        | TMC8     | TMC8    |
| hsa-miR-20b | TMCC1    | TMCC1    | -       |
| hsa-miR-20b | TMEM100  | TMEM100  | -       |
| hsa-miR-20b | TMEM123  | TMEM123  | -       |

|             |          |           |           |
|-------------|----------|-----------|-----------|
| hsa-miR-20b | TMEM127  | TMEM127   | -         |
| hsa-miR-20b | TMEM133  | TMEM133   | -         |
| hsa-miR-20b | TMEM135  | TMEM135   | -         |
| hsa-miR-20b | -        | TMEM156   | TMEM156   |
| hsa-miR-20b | TMEM167A | TMEM167A  | -         |
| hsa-miR-20b | TMEM168  | TMEM168   | -         |
| hsa-miR-20b | -        | TMEM17    | TMEM17    |
| hsa-miR-20b | -        | TMEM188   | TMEM188   |
| hsa-miR-20b | TMEM25   | TMEM25    | -         |
| hsa-miR-20b | -        | TMEM38A   | TMEM38A   |
| hsa-miR-20b | TMEM50B  | TMEM50B   | -         |
| hsa-miR-20b | TMEM64   | TMEM64    | -         |
| hsa-miR-20b | -        | TMPRSS11B | TMPRSS11B |
| hsa-miR-20b | TMTC1    | TMTC1     | -         |
| hsa-miR-20b | TMX3     | TMX3      | -         |
| hsa-miR-20b | TNFAIP1  | TNFAIP1   | -         |
| hsa-miR-20b | TNFAIP3  | TNFAIP3   | -         |
| hsa-miR-20b | -        | TNFAIP8L1 | TNFAIP8L1 |
| hsa-miR-20b | -        | TNFRSF10A | TNFRSF10A |
| hsa-miR-20b | -        | TNFRSF10B | TNFRSF10B |
| hsa-miR-20b | TNFRSF21 | TNFRSF21  | -         |
| hsa-miR-20b | TNFSF11  | TNFSF11   | -         |
| hsa-miR-20b | -        | TNFSF14   | TNFSF14   |
| hsa-miR-20b | -        | TNIP3     | TNIP3     |
| hsa-miR-20b | TNKS2    | TNKS2     | -         |
| hsa-miR-20b | TNRC6A   | TNRC6A    | -         |
| hsa-miR-20b | TNRC6C   | TNRC6C    | -         |
| hsa-miR-20b | TNS1     | TNS1      | -         |
| hsa-miR-20b | TOLLIP   | TOLLIP    | -         |
| hsa-miR-20b | -        | TOMM7     | TOMM7     |
| hsa-miR-20b | TOPORS   | TOPORS    | -         |
| hsa-miR-20b | TP53INP1 | TP53INP1  | -         |
| hsa-miR-20b | TP53INP2 | TP53INP2  | -         |
| hsa-miR-20b | TPRG1L   | TPRG1L    | -         |
| hsa-miR-20b | -        | TRDMT1    | TRDMT1    |
| hsa-miR-20b | -        | TRIM14    | TRIM14    |
| hsa-miR-20b | TRIM36   | TRIM36    | -         |
| hsa-miR-20b | TRIM37   | TRIM37    | -         |
| hsa-miR-20b | TRIM44   | TRIM44    | -         |
| hsa-miR-20b | TRIM66   | TRIM66    | -         |
| hsa-miR-20b | TRIOBP   | TRIOBP    | -         |
| hsa-miR-20b | TRIP10   | TRIP10    | -         |
| hsa-miR-20b | -        | TRPM1     | TRPM1     |
| hsa-miR-20b | TRPS1    | TRPS1     | -         |
| hsa-miR-20b | TSC22D2  | TSC22D2   | -         |
| hsa-miR-20b | TSPAN9   | TSPAN9    | -         |
| hsa-miR-20b | TTC39C   | TTC39C    | -         |
| hsa-miR-20b | TTC9     | TTC9      | -         |
| hsa-miR-20b | -        | TTPA      | TTPA      |
| hsa-miR-20b | TTPAL    | TTPAL     | -         |
| hsa-miR-20b | TUSC2    | TUSC2     | -         |

|             |         |         |         |
|-------------|---------|---------|---------|
| hsa-miR-20b | TWF1    | TWF1    | -       |
| hsa-miR-20b | TXLNA   | TXLNA   | -       |
| hsa-miR-20b | -       | TXNDC6  | TXNDC6  |
| hsa-miR-20b | TXNIP   | TXNIP   | -       |
| hsa-miR-20b | UBASH3B | UBASH3B | -       |
| hsa-miR-20b | UBC     | UBC     | -       |
| hsa-miR-20b | -       | UBE2B   | UBE2B   |
| hsa-miR-20b | UBE2J1  | UBE2J1  | -       |
| hsa-miR-20b | UBE2Q2  | UBE2Q2  | -       |
| hsa-miR-20b | UBE2W   | UBE2W   | -       |
| hsa-miR-20b | UBE3C   | UBE3C   | -       |
| hsa-miR-20b | UBFD1   | UBFD1   | -       |
| hsa-miR-20b | UBQLN4  | UBQLN4  | -       |
| hsa-miR-20b | UBR5    | UBR5    | -       |
| hsa-miR-20b | UBXN2A  | UBXN2A  | -       |
| hsa-miR-20b | UCP3    | UCP3    | -       |
| hsa-miR-20b | UEVLD   | UEVLD   | -       |
| hsa-miR-20b | -       | UGP2    | UGP2    |
| hsa-miR-20b | ULK1    | ULK1    | -       |
| hsa-miR-20b | UNC80   | UNC80   | -       |
| hsa-miR-20b | UNK     | UNK     | -       |
| hsa-miR-20b | UPF3A   | UPF3A   | -       |
| hsa-miR-20b | -       | USP16   | USP16   |
| hsa-miR-20b | USP24   | USP24   | -       |
| hsa-miR-20b | USP28   | USP28   | -       |
| hsa-miR-20b | USP3    | USP3    | -       |
| hsa-miR-20b | USP31   | USP31   | -       |
| hsa-miR-20b | USP32   | USP32   | -       |
| hsa-miR-20b | USP37   | USP37   | -       |
| hsa-miR-20b | USP46   | USP46   | -       |
| hsa-miR-20b | USP53   | USP53   | -       |
| hsa-miR-20b | USP6    | USP6    | -       |
| hsa-miR-20b | UXS1    | UXS1    | -       |
| hsa-miR-20b | VANGL1  | VANGL1  | -       |
| hsa-miR-20b | VASH2   | VASH2   | -       |
| hsa-miR-20b | VASP    | VASP    | -       |
| hsa-miR-20b | VEGFA   | VEGFA   | -       |
| hsa-miR-20b | VPS13C  | VPS13C  | -       |
| hsa-miR-20b | -       | VRK1    | VRK1    |
| hsa-miR-20b | WAC     | WAC     | -       |
| hsa-miR-20b | WASF3   | WASF3   | -       |
| hsa-miR-20b | -       | WBSCR22 | WBSCR22 |
| hsa-miR-20b | WDFY2   | WDFY2   | -       |
| hsa-miR-20b | WDFY3   | WDFY3   | -       |
| hsa-miR-20b | -       | WDR19   | WDR19   |
| hsa-miR-20b | WDR37   | WDR37   | -       |
| hsa-miR-20b | -       | WDR45   | WDR45   |
| hsa-miR-20b | -       | WDR73   | WDR73   |
| hsa-miR-20b | WDR82   | WDR82   | -       |
| hsa-miR-20b | WFS1    | WFS1    | -       |
| hsa-miR-20b | WHSC1   | WHSC1   | -       |

|             |         |         |        |
|-------------|---------|---------|--------|
| hsa-miR-20b | WIPF2   | WIPF2   | -      |
| hsa-miR-20b | WNK1    | WNK1    | -      |
| hsa-miR-20b | WNK3    | WNK3    | -      |
| hsa-miR-20b | WWC2    | WWC2    | -      |
| hsa-miR-20b | XRN1    | XRN1    | -      |
| hsa-miR-20b | XRRA1   | XRRA1   | -      |
| hsa-miR-20b | YES1    | YES1    | -      |
| hsa-miR-20b | YOD1    | YOD1    | -      |
| hsa-miR-20b | YPEL2   | YPEL2   | -      |
| hsa-miR-20b | YPEL4   | YPEL4   | -      |
| hsa-miR-20b | YTHDF3  | YTHDF3  | -      |
| hsa-miR-20b | ZADH2   | ZADH2   | -      |
| hsa-miR-20b | ZBTB33  | ZBTB33  | -      |
| hsa-miR-20b | ZBTB4   | ZBTB4   | -      |
| hsa-miR-20b | ZBTB41  | ZBTB41  | -      |
| hsa-miR-20b | ZBTB43  | ZBTB43  | -      |
| hsa-miR-20b | ZBTB47  | ZBTB47  | -      |
| hsa-miR-20b | ZBTB6   | ZBTB6   | -      |
| hsa-miR-20b | ZBTB7A  | ZBTB7A  | -      |
| hsa-miR-20b | ZBTB8A  | ZBTB8A  | -      |
| hsa-miR-20b | ZBTB9   | ZBTB9   | -      |
| hsa-miR-20b | ZC3H12C | ZC3H12C | -      |
| hsa-miR-20b | ZC3H7B  | ZC3H7B  | -      |
| hsa-miR-20b | ZDHHC8  | ZDHHC8  | -      |
| hsa-miR-20b | ZDHHC9  | ZDHHC9  | -      |
| hsa-miR-20b | ZFP161  | ZFP161  | -      |
| hsa-miR-20b | ZFP3    | ZFP3    | -      |
| hsa-miR-20b | ZFP91   | ZFP91   | -      |
| hsa-miR-20b | ZFPM2   | ZFPM2   | -      |
| hsa-miR-20b | ZFY     | ZFY     | -      |
| hsa-miR-20b | ZFYVE16 | ZFYVE16 | -      |
| hsa-miR-20b | ZFYVE26 | ZFYVE26 | -      |
| hsa-miR-20b | ZHX2    | ZHX2    | -      |
| hsa-miR-20b | -       | ZIM3    | ZIM3   |
| hsa-miR-20b | ZMAT3   | -       | ZMAT3  |
| hsa-miR-20b | -       | ZNF101  | ZNF101 |
| hsa-miR-20b | ZNF148  | ZNF148  | -      |
| hsa-miR-20b | -       | ZNF197  | ZNF197 |
| hsa-miR-20b | ZNF2    | ZNF2    | -      |
| hsa-miR-20b | ZNF202  | ZNF202  | -      |
| hsa-miR-20b | ZNF217  | ZNF217  | -      |
| hsa-miR-20b | ZNF236  | ZNF236  | -      |
| hsa-miR-20b | ZNF238  | ZNF238  | -      |
| hsa-miR-20b | -       | ZNF239  | ZNF239 |
| hsa-miR-20b | ZNF25   | ZNF25   | -      |
| hsa-miR-20b | ZNF280B | ZNF280B | -      |
| hsa-miR-20b | ZNF295  | ZNF295  | -      |
| hsa-miR-20b | ZNF362  | ZNF362  | -      |
| hsa-miR-20b | ZNF367  | ZNF367  | -      |
| hsa-miR-20b | ZNF385A | ZNF385A | -      |
| hsa-miR-20b | -       | ZNF454  | ZNF454 |

|             |          |          |          |
|-------------|----------|----------|----------|
| hsa-miR-20b | ZNF498   | ZNF498   | -        |
| hsa-miR-20b | ZNF512B  | ZNF512B  | -        |
| hsa-miR-20b | ZNF532   | ZNF532   | -        |
| hsa-miR-20b | -        | ZNF611   | ZNF611   |
| hsa-miR-20b | ZNF652   | ZNF652   | -        |
| hsa-miR-20b | -        | ZNF695   | ZNF695   |
| hsa-miR-20b | ZNF697   | ZNF697   | -        |
| hsa-miR-20b | ZNF704   | ZNF704   | -        |
| hsa-miR-20b | -        | ZNF724P  | ZNF724P  |
| hsa-miR-20b | -        | ZNF749   | ZNF749   |
| hsa-miR-20b | -        | ZNF791   | ZNF791   |
| hsa-miR-20b | ZNF800   | ZNF800   | -        |
| hsa-miR-20b | ZNF862   | ZNF862   | -        |
| hsa-miR-20b | ZRANB1   | ZRANB1   | -        |
| hsa-miR-20b | ZSCAN20  | ZSCAN20  | -        |
| hsa-miR-212 | ABCG4    | ABCG4    | -        |
| hsa-miR-212 | ABHD5    | ABHD5    | -        |
| hsa-miR-212 | ABR      | ABR      | -        |
| hsa-miR-212 | -        | ACAD11   | ACAD11   |
| hsa-miR-212 | -        | ACAD9    | ACAD9    |
| hsa-miR-212 | -        | ACO2     | ACO2     |
| hsa-miR-212 | ACOT11   | ACOT11   | -        |
| hsa-miR-212 | ACVR1    | ACVR1    | -        |
| hsa-miR-212 | ACVR2B   | -        | ACVR2B   |
| hsa-miR-212 | -        | ADAL     | ADAL     |
| hsa-miR-212 | ADAM22   | ADAM22   | -        |
| hsa-miR-212 | ADAMTS18 | ADAMTS18 | -        |
| hsa-miR-212 | ADAMTS5  | ADAMTS5  | -        |
| hsa-miR-212 | -        | ADAMTSL1 | ADAMTSL1 |
| hsa-miR-212 | ADCY3    | ADCY3    | -        |
| hsa-miR-212 | ADCY9    | ADCY9    | -        |
| hsa-miR-212 | ADD1     | ADD1     | -        |
| hsa-miR-212 | ADORA2B  | ADORA2B  | -        |
| hsa-miR-212 | AFF4     | -        | AFF4     |
| hsa-miR-212 | AGBL4    | AGBL4    | -        |
| hsa-miR-212 | AGPAT3   | -        | AGPAT3   |
| hsa-miR-212 | -        | AHCY     | AHCY     |
| hsa-miR-212 | AHCYL1   | AHCYL1   | -        |
| hsa-miR-212 | AHCYL2   | AHCYL2   | -        |
| hsa-miR-212 | AHNAK    | AHNAK    | -        |
| hsa-miR-212 | ALDH3B1  | ALDH3B1  | -        |
| hsa-miR-212 | AMD1     | AMD1     | -        |
| hsa-miR-212 | ANKFY1   | ANKFY1   | -        |
| hsa-miR-212 | ANKRD29  | ANKRD29  | -        |
| hsa-miR-212 | ANKRD34C | ANKRD34C | -        |
| hsa-miR-212 | ANKRD40  | ANKRD40  | -        |
| hsa-miR-212 | ANO1     | ANO1     | -        |
| hsa-miR-212 | ANP32A   | ANP32A   | -        |
| hsa-miR-212 | -        | ANXA4    | ANXA4    |
| hsa-miR-212 | APAF1    | APAF1    | -        |
| hsa-miR-212 | APH1B    | APH1B    | -        |

|             |          |          |          |
|-------------|----------|----------|----------|
| hsa-miR-212 | APLP2    | APLP2    | -        |
| hsa-miR-212 | -        | APOA1BP  | APOA1BP  |
| hsa-miR-212 | ARF3     | ARF3     | -        |
| hsa-miR-212 | ARFGAP2  | ARFGAP2  | -        |
| hsa-miR-212 | ARGFX    | ARGFX    | -        |
| hsa-miR-212 | ARHGAP17 | ARHGAP17 | -        |
| hsa-miR-212 | ARHGAP29 | ARHGAP29 | -        |
| hsa-miR-212 | ARHGEF11 | ARHGEF11 | -        |
| hsa-miR-212 | -        | ARID1A   | ARID1A   |
| hsa-miR-212 | ARID2    | ARID2    | -        |
| hsa-miR-212 | ARIH1    | ARIH1    | -        |
| hsa-miR-212 | ARL3     | ARL3     | -        |
| hsa-miR-212 | -        | ARMC1    | ARMC1    |
| hsa-miR-212 | ASB1     | -        | ASB1     |
| hsa-miR-212 | ATM      | ATM      | -        |
| hsa-miR-212 | ATN1     | -        | ATN1     |
| hsa-miR-212 | ATP2B4   | ATP2B4   | -        |
| hsa-miR-212 | ATXN3    | ATXN3    | -        |
| hsa-miR-212 | ATXN7    | ATXN7    | -        |
| hsa-miR-212 | -        | AVPI1    | AVPI1    |
| hsa-miR-212 | AXIN1    | AXIN1    | -        |
| hsa-miR-212 | -        | AXIN2    | AXIN2    |
| hsa-miR-212 | -        | AZIN1    | AZIN1    |
| hsa-miR-212 | -        | B3GNT8   | B3GNT8   |
| hsa-miR-212 | B4GALT6  | B4GALT6  | -        |
| hsa-miR-212 | BBS7     | BBS7     | -        |
| hsa-miR-212 | BBX      | BBX      | -        |
| hsa-miR-212 | BCAN     | BCAN     | -        |
| hsa-miR-212 | BCL2L1   | BCL2L1   | -        |
| hsa-miR-212 | -        | BCL2L11  | BCL2L11  |
| hsa-miR-212 | BCL2L15  | BCL2L15  | -        |
| hsa-miR-212 | BCL2L2   | BCL2L2   | -        |
| hsa-miR-212 | BDH1     | BDH1     | -        |
| hsa-miR-212 | BICD2    | BICD2    | -        |
| hsa-miR-212 | BLCAP    | BLCAP    | -        |
| hsa-miR-212 | -        | BMI1     | BMI1     |
| hsa-miR-212 | BMS1     | -        | BMS1     |
| hsa-miR-212 | BNIP2    | BNIP2    | -        |
| hsa-miR-212 | BOLL     | BOLL     | -        |
| hsa-miR-212 | -        | BRAP     | BRAP     |
| hsa-miR-212 | BRCA1    | BRCA1    | -        |
| hsa-miR-212 | BRD3     | BRD3     | -        |
| hsa-miR-212 | -        | BRI3     | BRI3     |
| hsa-miR-212 | BRSK1    | BRSK1    | -        |
| hsa-miR-212 | BRWD1    | BRWD1    | -        |
| hsa-miR-212 | BTAF1    | BTAF1    | -        |
| hsa-miR-212 | BTBD7    | BTBD7    | -        |
| hsa-miR-212 | BTRC     | BTRC     | -        |
| hsa-miR-212 | C11orf87 | C11orf87 | -        |
| hsa-miR-212 | -        | C12orf26 | C12orf26 |
| hsa-miR-212 | -        | C12orf48 | C12orf48 |

|             |           |           |           |
|-------------|-----------|-----------|-----------|
| hsa-miR-212 | -         | C13orf18  | C13orf18  |
| hsa-miR-212 | C14orf147 | C14orf147 | -         |
| hsa-miR-212 | -         | C14orf148 | C14orf148 |
| hsa-miR-212 | -         | C14orf149 | C14orf149 |
| hsa-miR-212 | C14orf43  | C14orf43  | -         |
| hsa-miR-212 | C15orf2   | C15orf2   | -         |
| hsa-miR-212 | C16orf57  | C16orf57  | -         |
| hsa-miR-212 | -         | C16orf68  | C16orf68  |
| hsa-miR-212 | C16orf87  | C16orf87  | -         |
| hsa-miR-212 | -         | C18orf34  | C18orf34  |
| hsa-miR-212 | -         | C19orf21  | C19orf21  |
| hsa-miR-212 | -         | C1QL1     | C1QL1     |
| hsa-miR-212 | C1orf115  | C1orf115  | -         |
| hsa-miR-212 | -         | C1orf129  | C1orf129  |
| hsa-miR-212 | C1orf88   | -         | C1orf88   |
| hsa-miR-212 | -         | C21orf119 | C21orf119 |
| hsa-miR-212 | C21orf91  | C21orf91  | -         |
| hsa-miR-212 | C2orf29   | C2orf29   | -         |
| hsa-miR-212 | C2orf44   | C2orf44   | -         |
| hsa-miR-212 | -         | C3orf1    | C3orf1    |
| hsa-miR-212 | -         | C3orf24   | C3orf24   |
| hsa-miR-212 | C3orf43   | C3orf43   | -         |
| hsa-miR-212 | C5orf13   | C5orf13   | -         |
| hsa-miR-212 | C5orf41   | C5orf41   | -         |
| hsa-miR-212 | C6orf132  | C6orf132  | -         |
| hsa-miR-212 | C7orf41   | C7orf41   | -         |
| hsa-miR-212 | C7orf60   | C7orf60   | -         |
| hsa-miR-212 | -         | C8A       | C8A       |
| hsa-miR-212 | C8orf46   | C8orf46   | -         |
| hsa-miR-212 | -         | C8orf47   | C8orf47   |
| hsa-miR-212 | CABLES1   | CABLES1   | -         |
| hsa-miR-212 | CACNA1A   | -         | CACNA1A   |
| hsa-miR-212 | CACNA1B   | CACNA1B   | -         |
| hsa-miR-212 | CACNA1G   | CACNA1G   | -         |
| hsa-miR-212 | CADM2     | CADM2     | -         |
| hsa-miR-212 | CAMKK1    | -         | CAMKK1    |
| hsa-miR-212 | CAMSAP1L1 | CAMSAP1L1 | -         |
| hsa-miR-212 | CAMTA1    | CAMTA1    | -         |
| hsa-miR-212 | -         | CAND1     | CAND1     |
| hsa-miR-212 | CAPN2     | CAPN2     | -         |
| hsa-miR-212 | CAPRIN1   | CAPRIN1   | -         |
| hsa-miR-212 | CASP7     | CASP7     | -         |
| hsa-miR-212 | CBFA2T2   | CBFA2T2   | -         |
| hsa-miR-212 | CBLN2     | CBLN2     | -         |
| hsa-miR-212 | -         | CBWD1     | CBWD1     |
| hsa-miR-212 | -         | CBWD2     | CBWD2     |
| hsa-miR-212 | -         | CBWD3     | CBWD3     |
| hsa-miR-212 | -         | CBWD5     | CBWD5     |
| hsa-miR-212 | -         | CBWD6     | CBWD6     |
| hsa-miR-212 | CCBE1     | CCBE1     | -         |
| hsa-miR-212 | CCDC117   | CCDC117   | -         |

|             |          |          |          |
|-------------|----------|----------|----------|
| hsa-miR-212 | -        | CCDC73   | CCDC73   |
| hsa-miR-212 | CCDC76   | CCDC76   | -        |
| hsa-miR-212 | CCDC88A  | CCDC88A  | -        |
| hsa-miR-212 | CCDC93   | CCDC93   | -        |
| hsa-miR-212 | -        | CCNG1    | CCNG1    |
| hsa-miR-212 | CD300LG  | -        | CD300LG  |
| hsa-miR-212 | -        | CD72     | CD72     |
| hsa-miR-212 | CDC25B   | CDC25B   | -        |
| hsa-miR-212 | CDC40    | CDC40    | -        |
| hsa-miR-212 | CDC42BPA | -        | CDC42BPA |
| hsa-miR-212 | CDC42SE2 | CDC42SE2 | -        |
| hsa-miR-212 | CDHR3    | CDHR3    | -        |
| hsa-miR-212 | CDK14    | CDK14    | -        |
| hsa-miR-212 | CDK19    | CDK19    | -        |
| hsa-miR-212 | -        | CDKL4    | CDKL4    |
| hsa-miR-212 | CDKN1A   | CDKN1A   | -        |
| hsa-miR-212 | CDV3     | CDV3     | -        |
| hsa-miR-212 | CECR6    | CECR6    | -        |
| hsa-miR-212 | CELF1    | CELF1    | -        |
| hsa-miR-212 | CELF2    | CELF2    | -        |
| hsa-miR-212 | CELSR3   | CELSR3   | -        |
| hsa-miR-212 | -        | CENPO    | CENPO    |
| hsa-miR-212 | -        | CENPQ    | CENPQ    |
| hsa-miR-212 | CEP63    | CEP63    | -        |
| hsa-miR-212 | CFL2     | CFL2     | -        |
| hsa-miR-212 | CGGBP1   | CGGBP1   | -        |
| hsa-miR-212 | CHD1     | CHD1     | -        |
| hsa-miR-212 | CHM      | CHM      | -        |
| hsa-miR-212 | CHTF8    | CHTF8    | -        |
| hsa-miR-212 | CIT      | CIT      | -        |
| hsa-miR-212 | CLASP2   | CLASP2   | -        |
| hsa-miR-212 | CLDN14   | -        | CLDN14   |
| hsa-miR-212 | CLEC12B  | CLEC12B  | -        |
| hsa-miR-212 | -        | CLP1     | CLP1     |
| hsa-miR-212 | -        | CMTM3    | CMTM3    |
| hsa-miR-212 | -        | CNO      | CNO      |
| hsa-miR-212 | CNOT2    | CNOT2    | -        |
| hsa-miR-212 | CNR1     | CNR1     | -        |
| hsa-miR-212 | CNTLN    | CNTLN    | -        |
| hsa-miR-212 | CNTNAP3B | CNTNAP3B | -        |
| hsa-miR-212 | COG5     | COG5     | -        |
| hsa-miR-212 | -        | COL1A1   | COL1A1   |
| hsa-miR-212 | COL5A2   | COL5A2   | -        |
| hsa-miR-212 | COL6A2   | COL6A2   | -        |
| hsa-miR-212 | -        | COMMD10  | COMMD10  |
| hsa-miR-212 | -        | COMMD8   | COMMD8   |
| hsa-miR-212 | -        | CORO7    | CORO7    |
| hsa-miR-212 | COX7A2L  | COX7A2L  | -        |
| hsa-miR-212 | CPNE3    | CPNE3    | -        |
| hsa-miR-212 | CPSF7    | CPSF7    | -        |
| hsa-miR-212 | CREB5    | CREB5    | -        |



|             |            |            |         |
|-------------|------------|------------|---------|
| hsa-miR-212 | CRK        | CRK        | -       |
| hsa-miR-212 | -          | CRLS1      | CRLS1   |
| hsa-miR-212 | CRNKL1     | CRNKL1     | -       |
| hsa-miR-212 | CRTC1      | -          | CRTC1   |
| hsa-miR-212 | CSDE1      | CSDE1      | -       |
| hsa-miR-212 | CSGALNACT1 | CSGALNACT1 | -       |
| hsa-miR-212 | -          | CSN1S1     | CSN1S1  |
| hsa-miR-212 | CSRNP3     | CSRNP3     | -       |
| hsa-miR-212 | CTDSPL2    | CTDSPL2    | -       |
| hsa-miR-212 | CTGF       | CTGF       | -       |
| hsa-miR-212 | CWC25      | CWC25      | -       |
| hsa-miR-212 | CXCL10     | CXCL10     | -       |
| hsa-miR-212 | CXorf1     | CXorf1     | -       |
| hsa-miR-212 | -          | CXorf26    | CXorf26 |
| hsa-miR-212 | CXorf36    | CXorf36    | -       |
| hsa-miR-212 | CYLD       | CYLD       | -       |
| hsa-miR-212 | CYP19A1    | CYP19A1    | -       |
| hsa-miR-212 | CYP27C1    | CYP27C1    | -       |
| hsa-miR-212 | CYYR1      | CYYR1      | -       |
| hsa-miR-212 | DAPK1      | DAPK1      | -       |
| hsa-miR-212 | DAPP1      | DAPP1      | -       |
| hsa-miR-212 | DAZAP2     | DAZAP2     | -       |
| hsa-miR-212 | DBN1       | DBN1       | -       |
| hsa-miR-212 | DCAF8      | DCAF8      | -       |
| hsa-miR-212 | DCDC2      | DCDC2      | -       |
| hsa-miR-212 | DCLK1      | DCLK1      | -       |
| hsa-miR-212 | DCLRE1C    | -          | DCLRE1C |
| hsa-miR-212 | DCUN1D4    | DCUN1D4    | -       |
| hsa-miR-212 | DDI1       | DDI1       | -       |
| hsa-miR-212 | DDX17      | DDX17      | -       |
| hsa-miR-212 | DDX19A     | DDX19A     | -       |
| hsa-miR-212 | -          | DDX23      | DDX23   |
| hsa-miR-212 | DDX3X      | DDX3X      | -       |
| hsa-miR-212 | DDX3Y      | DDX3Y      | -       |
| hsa-miR-212 | DDX51      | DDX51      | -       |
| hsa-miR-212 | -          | DEDD       | DEDD    |
| hsa-miR-212 | DENND1A    | DENND1A    | -       |
| hsa-miR-212 | DENND1B    | DENND1B    | -       |
| hsa-miR-212 | DENND5B    | DENND5B    | -       |
| hsa-miR-212 | DFFA       | DFFA       | -       |
| hsa-miR-212 | DHH        | -          | DHH     |
| hsa-miR-212 | DHX57      | DHX57      | -       |
| hsa-miR-212 | DLC1       | DLC1       | -       |
| hsa-miR-212 | DLG2       | DLG2       | -       |
| hsa-miR-212 | DLL1       | DLL1       | -       |
| hsa-miR-212 | DLX3       | DLX3       | -       |
| hsa-miR-212 | DMD        | DMD        | -       |
| hsa-miR-212 | -          | DNAH2      | DNAH2   |
| hsa-miR-212 | DNAJA2     | DNAJA2     | -       |
| hsa-miR-212 | DNM3       | DNM3       | -       |
| hsa-miR-212 | DNMT3A     | DNMT3A     | -       |

|             |          |          |         |
|-------------|----------|----------|---------|
| hsa-miR-212 | -        | DNTT     | DNTT    |
| hsa-miR-212 | DOK4     | DOK4     | -       |
| hsa-miR-212 | DPH3     | DPH3     | -       |
| hsa-miR-212 | DPYSL3   | DPYSL3   | -       |
| hsa-miR-212 | -        | DSCR6    | DSCR6   |
| hsa-miR-212 | DTNA     | DTNA     | -       |
| hsa-miR-212 | DYNC1LI2 | DYNC1LI2 | -       |
| hsa-miR-212 | E2F3     | E2F3     | -       |
| hsa-miR-212 | -        | ECT2     | ECT2    |
| hsa-miR-212 | -        | EFEMP2   | EFEMP2  |
| hsa-miR-212 | EFR3B    | EFR3B    | -       |
| hsa-miR-212 | EGR1     | EGR1     | -       |
| hsa-miR-212 | EGR4     | EGR4     | -       |
| hsa-miR-212 | EHF      | EHF      | -       |
| hsa-miR-212 | EIF2A    | EIF2A    | -       |
| hsa-miR-212 | EIF2AK4  | EIF2AK4  | -       |
| hsa-miR-212 | EIF2C1   | EIF2C1   | -       |
| hsa-miR-212 | EIF2S1   | EIF2S1   | -       |
| hsa-miR-212 | EIF2S3   | EIF2S3   | -       |
| hsa-miR-212 | EIF3J    | EIF3J    | -       |
| hsa-miR-212 | -        | EIF4A3   | EIF4A3  |
| hsa-miR-212 | ELOVL2   | ELOVL2   | -       |
| hsa-miR-212 | -        | EMILIN2  | EMILIN2 |
| hsa-miR-212 | EN1      | EN1      | -       |
| hsa-miR-212 | -        | ENPEP    | ENPEP   |
| hsa-miR-212 | ENPP4    | ENPP4    | -       |
| hsa-miR-212 | EP300    | EP300    | -       |
| hsa-miR-212 | EPB41L4B | EPB41L4B | -       |
| hsa-miR-212 | EPHB2    | EPHB2    | -       |
| hsa-miR-212 | -        | EPHX2    | EPHX2   |
| hsa-miR-212 | EPM2AIP1 | EPM2AIP1 | -       |
| hsa-miR-212 | EPT1     | EPT1     | -       |
| hsa-miR-212 | ERCC1    | -        | ERCC1   |
| hsa-miR-212 | ESRRG    | ESRRG    | -       |
| hsa-miR-212 | ETNK1    | ETNK1    | -       |
| hsa-miR-212 | ETNK2    | ETNK2    | -       |
| hsa-miR-212 | ETV1     | ETV1     | -       |
| hsa-miR-212 | EXD2     | EXD2     | -       |
| hsa-miR-212 | EXTL1    | EXTL1    | -       |
| hsa-miR-212 | EXTL2    | EXTL2    | -       |
| hsa-miR-212 | -        | EZH1     | EZH1    |
| hsa-miR-212 | FADS2    | FADS2    | -       |
| hsa-miR-212 | FAM105B  | FAM105B  | -       |
| hsa-miR-212 | FAM134A  | FAM134A  | -       |
| hsa-miR-212 | FAM13A   | FAM13A   | -       |
| hsa-miR-212 | FAM167A  | FAM167A  | -       |
| hsa-miR-212 | FAM198B  | FAM198B  | -       |
| hsa-miR-212 | FAM199X  | FAM199X  | -       |
| hsa-miR-212 | -        | FAM54A   | FAM54A  |
| hsa-miR-212 | FAM65B   | FAM65B   | -       |
| hsa-miR-212 | FAM81A   | FAM81A   | -       |

|             |           |           |          |
|-------------|-----------|-----------|----------|
| hsa-miR-212 | FAM91A1   | FAM91A1   | -        |
| hsa-miR-212 | -         | FANK1     | FANK1    |
| hsa-miR-212 | -         | FARP2     | FARP2    |
| hsa-miR-212 | FAS       | FAS       | -        |
| hsa-miR-212 | FAT2      | FAT2      | -        |
| hsa-miR-212 | FBXO21    | FBXO21    | -        |
| hsa-miR-212 | FBXO28    | FBXO28    | -        |
| hsa-miR-212 | FBXO9     | FBXO9     | -        |
| hsa-miR-212 | FBXW11    | FBXW11    | -        |
| hsa-miR-212 | FBXW2     | FBXW2     | -        |
| hsa-miR-212 | FBXW7     | FBXW7     | -        |
| hsa-miR-212 | FEM1C     | FEM1C     | -        |
| hsa-miR-212 | -         | FGD5      | FGD5     |
| hsa-miR-212 | FGF7      | FGF7      | -        |
| hsa-miR-212 | -         | FHL3      | FHL3     |
| hsa-miR-212 | FIGF      | FIGF      | -        |
| hsa-miR-212 | FLI1      | FLI1      | -        |
| hsa-miR-212 | FLJ36031  | FLJ36031  | -        |
| hsa-miR-212 | -         | FLOT1     | FLOT1    |
| hsa-miR-212 | FLT1      | FLT1      | -        |
| hsa-miR-212 | FLT4      | FLT4      | -        |
| hsa-miR-212 | -         | FNBP1     | FNBP1    |
| hsa-miR-212 | -         | FOLR2     | FOLR2    |
| hsa-miR-212 | FOXA1     | FOXA1     | -        |
| hsa-miR-212 | FOXO1     | FOXO1     | -        |
| hsa-miR-212 | FOXO3     | FOXO3     | -        |
| hsa-miR-212 | FREM2     | FREM2     | -        |
| hsa-miR-212 | -         | FRK       | FRK      |
| hsa-miR-212 | FRS2      | FRS2      | -        |
| hsa-miR-212 | -         | FTSJ2     | FTSJ2    |
| hsa-miR-212 | -         | FUCA2     | FUCA2    |
| hsa-miR-212 | FXR1      | FXR1      | -        |
| hsa-miR-212 | FYCO1     | FYCO1     | -        |
| hsa-miR-212 | GAB2      | GAB2      | -        |
| hsa-miR-212 | GABARAPL1 | GABARAPL1 | -        |
| hsa-miR-212 | GABBR1    | GABBR1    | -        |
| hsa-miR-212 | GABRA5    | GABRA5    | -        |
| hsa-miR-212 | GAD1      | GAD1      | -        |
| hsa-miR-212 | GALNT10   | GALNT10   | -        |
| hsa-miR-212 | GALNT6    | GALNT6    | -        |
| hsa-miR-212 | GALNTL1   | GALNTL1   | -        |
| hsa-miR-212 | GATA2     | GATA2     | -        |
| hsa-miR-212 | -         | GBA       | GBA      |
| hsa-miR-212 | -         | GCNT4     | GCNT4    |
| hsa-miR-212 | -         | GHRL      | GHRL     |
| hsa-miR-212 | GINS3     | GINS3     | -        |
| hsa-miR-212 | -         | GLIPR1L2  | GLIPR1L2 |
| hsa-miR-212 | GMFB      | GMFB      | -        |
| hsa-miR-212 | -         | GMNN      | GMNN     |
| hsa-miR-212 | GNA12     | GNA12     | -        |
| hsa-miR-212 | GNB1      | GNB1      | -        |

|             |          |          |         |
|-------------|----------|----------|---------|
| hsa-miR-212 | GNL1     | -        | GNL1    |
| hsa-miR-212 | GOLGA3   | GOLGA3   | -       |
| hsa-miR-212 | GOLM1    | GOLM1    | -       |
| hsa-miR-212 | GOSR1    | GOSR1    | -       |
| hsa-miR-212 | GPD2     | GPD2     | -       |
| hsa-miR-212 | GPR126   | GPR126   | -       |
| hsa-miR-212 | GPR133   | GPR133   | -       |
| hsa-miR-212 | -        | GPR144   | GPR144  |
| hsa-miR-212 | -        | GPR17    | GPR17   |
| hsa-miR-212 | GPR180   | GPR180   | -       |
| hsa-miR-212 | -        | GPR89A   | GPR89A  |
| hsa-miR-212 | -        | GPR89B   | GPR89B  |
| hsa-miR-212 | GPR98    | -        | GPR98   |
| hsa-miR-212 | GRASP    | -        | GRASP   |
| hsa-miR-212 | -        | GRINL1A  | GRINL1A |
| hsa-miR-212 | GRM1     | -        | GRM1    |
| hsa-miR-212 | GRM5     | GRM5     | -       |
| hsa-miR-212 | -        | GSK3A    | GSK3A   |
| hsa-miR-212 | GTF2F2   | GTF2F2   | -       |
| hsa-miR-212 | GTPBP10  | GTPBP10  | -       |
| hsa-miR-212 | -        | GUCA1B   | GUCA1B  |
| hsa-miR-212 | GXYLT2   | GXYLT2   | -       |
| hsa-miR-212 | H2AFV    | H2AFV    | -       |
| hsa-miR-212 | H3F3B    | H3F3B    | -       |
| hsa-miR-212 | HAO1     | HAO1     | -       |
| hsa-miR-212 | HAPLN1   | HAPLN1   | -       |
| hsa-miR-212 | -        | HAVCR2   | HAVCR2  |
| hsa-miR-212 | -        | HBS1L    | HBS1L   |
| hsa-miR-212 | HDAC3    | HDAC3    | -       |
| hsa-miR-212 | HEG1     | -        | HEG1    |
| hsa-miR-212 | -        | HEXB     | HEXB    |
| hsa-miR-212 | HEY1     | -        | HEY1    |
| hsa-miR-212 | HIP1R    | HIP1R    | -       |
| hsa-miR-212 | -        | HIRA     | HIRA    |
| hsa-miR-212 | HLA-DOB  | HLA-DOB  | -       |
| hsa-miR-212 | HLA-DQA1 | HLA-DQA1 | -       |
| hsa-miR-212 | HMGGA2   | HMGGA2   | -       |
| hsa-miR-212 | HMGXB4   | HMGXB4   | -       |
| hsa-miR-212 | HN1      | HN1      | -       |
| hsa-miR-212 | HNRNPH1  | HNRNPH1  | -       |
| hsa-miR-212 | HNRNPU   | HNRNPU   | -       |
| hsa-miR-212 | -        | HOMER1   | HOMER1  |
| hsa-miR-212 | HOXB13   | -        | HOXB13  |
| hsa-miR-212 | HPS1     | -        | HPS1    |
| hsa-miR-212 | HS2ST1   | HS2ST1   | -       |
| hsa-miR-212 | HSF5     | HSF5     | -       |
| hsa-miR-212 | HSPC159  | HSPC159  | -       |
| hsa-miR-212 | HSPH1    | HSPH1    | -       |
| hsa-miR-212 | -        | IDH3B    | IDH3B   |
| hsa-miR-212 | IDS      | IDS      | -       |
| hsa-miR-212 | -        | IER3IP1  | IER3IP1 |

|             |          |          |          |
|-------------|----------|----------|----------|
| hsa-miR-212 | IGSF11   | IGSF11   | -        |
| hsa-miR-212 | -        | IHH      | IHH      |
| hsa-miR-212 | IL16     | -        | IL16     |
| hsa-miR-212 | IL6R     | IL6R     | -        |
| hsa-miR-212 | IMPACT   | IMPACT   | -        |
| hsa-miR-212 | -        | IMPG1    | IMPG1    |
| hsa-miR-212 | IMPG2    | IMPG2    | -        |
| hsa-miR-212 | INA      | INA      | -        |
| hsa-miR-212 | INHBB    | INHBB    | -        |
| hsa-miR-212 | INMT     | INMT     | -        |
| hsa-miR-212 | INSL5    | INSL5    | -        |
| hsa-miR-212 | -        | INTU     | INTU     |
| hsa-miR-212 | -        | IPO11    | IPO11    |
| hsa-miR-212 | -        | IQCH     | IQCH     |
| hsa-miR-212 | IQSEC1   | IQSEC1   | -        |
| hsa-miR-212 | -        | IRAK4    | IRAK4    |
| hsa-miR-212 | IRF1     | -        | IRF1     |
| hsa-miR-212 | ISL1     | ISL1     | -        |
| hsa-miR-212 | ITPKB    | ITPKB    | -        |
| hsa-miR-212 | IVD      | -        | IVD      |
| hsa-miR-212 | JOSD1    | JOSD1    | -        |
| hsa-miR-212 | JRK      | JRK      | -        |
| hsa-miR-212 | KCMF1    | KCMF1    | -        |
| hsa-miR-212 | KCNA6    | KCNA6    | -        |
| hsa-miR-212 | KCNC2    | KCNC2    | -        |
| hsa-miR-212 | KCNE4    | KCNE4    | -        |
| hsa-miR-212 | KCNK2    | KCNK2    | -        |
| hsa-miR-212 | -        | KCTD14   | KCTD14   |
| hsa-miR-212 | KCTD21   | KCTD21   | -        |
| hsa-miR-212 | KDM5A    | KDM5A    | -        |
| hsa-miR-212 | KDM5B    | KDM5B    | -        |
| hsa-miR-212 | KDM5C    | KDM5C    | -        |
| hsa-miR-212 | KHDRBS2  | KHDRBS2  | -        |
| hsa-miR-212 | KIAA0240 | KIAA0240 | -        |
| hsa-miR-212 | KIAA0284 | KIAA0284 | -        |
| hsa-miR-212 | -        | KIAA0586 | KIAA0586 |
| hsa-miR-212 | KIAA1211 | KIAA1211 | -        |
| hsa-miR-212 | KIAA1310 | KIAA1310 | -        |
| hsa-miR-212 | KIAA1549 | KIAA1549 | -        |
| hsa-miR-212 | -        | KIAA2026 | KIAA2026 |
| hsa-miR-212 | KIF21B   | KIF21B   | -        |
| hsa-miR-212 | KIF4A    | -        | KIF4A    |
| hsa-miR-212 | -        | KIF5C    | KIF5C    |
| hsa-miR-212 | KIN      | KIN      | -        |
| hsa-miR-212 | KITLG    | KITLG    | -        |
| hsa-miR-212 | KLB      | KLB      | -        |
| hsa-miR-212 | KLHDC10  | KLHDC10  | -        |
| hsa-miR-212 | KLHL29   | KLHL29   | -        |
| hsa-miR-212 | KLK2     | KLK2     | -        |
| hsa-miR-212 | KRIT1    | KRIT1    | -        |
| hsa-miR-212 | -        | KRT83    | KRT83    |

|             |              |              |        |
|-------------|--------------|--------------|--------|
| hsa-miR-212 | L3MBTL3      | L3MBTL3      | -      |
| hsa-miR-212 | LAIR1        | LAIR1        | -      |
| hsa-miR-212 | LAMP2        | LAMP2        | -      |
| hsa-miR-212 | LARGE        | LARGE        | -      |
| hsa-miR-212 | -            | LCK          | LCK    |
| hsa-miR-212 | LEMD3        | LEMD3        | -      |
| hsa-miR-212 | -            | LGR4         | LGR4   |
| hsa-miR-212 | -            | LIMS1        | LIMS1  |
| hsa-miR-212 | LIN28B       | LIN28B       | -      |
| hsa-miR-212 | LMO2         | LMO2         | -      |
| hsa-miR-212 | LOC100329135 | LOC100329135 | -      |
| hsa-miR-212 | LRFN5        | LRFN5        | -      |
| hsa-miR-212 | LRIT2        | LRIT2        | -      |
| hsa-miR-212 | LRP2         | LRP2         | -      |
| hsa-miR-212 | LRRC10       | LRRC10       | -      |
| hsa-miR-212 | LRRC32       | LRRC32       | -      |
| hsa-miR-212 | LRRC55       | LRRC55       | -      |
| hsa-miR-212 | LRRC57       | LRRC57       | -      |
| hsa-miR-212 | LRRC8E       | LRRC8E       | -      |
| hsa-miR-212 | LRRTM2       | LRRTM2       | -      |
| hsa-miR-212 | LRRTM3       | LRRTM3       | -      |
| hsa-miR-212 | LRTM2        | LRTM2        | -      |
| hsa-miR-212 | -            | LSM1         | LSM1   |
| hsa-miR-212 | LSM11        | LSM11        | -      |
| hsa-miR-212 | LSM12        | LSM12        | -      |
| hsa-miR-212 | -            | LTB          | LTB    |
| hsa-miR-212 | -            | LYSMD1       | LYSMD1 |
| hsa-miR-212 | MAF          | MAF          | -      |
| hsa-miR-212 | -            | MAGI3        | MAGI3  |
| hsa-miR-212 | MAML1        | MAML1        | -      |
| hsa-miR-212 | -            | MAN1C1       | MAN1C1 |
| hsa-miR-212 | MAN2A2       | MAN2A2       | -      |
| hsa-miR-212 | MAP3K3       | MAP3K3       | -      |
| hsa-miR-212 | -            | MAP3K8       | MAP3K8 |
| hsa-miR-212 | MAPK1        | MAPK1        | -      |
| hsa-miR-212 | MAPKAP1      | MAPKAP1      | -      |
| hsa-miR-212 | MAPKBP1      | MAPKBP1      | -      |
| hsa-miR-212 | MAPT         | MAPT         | -      |
| hsa-miR-212 | MARK3        | MARK3        | -      |
| hsa-miR-212 | MAST3        | MAST3        | -      |
| hsa-miR-212 | MATN3        | MATN3        | -      |
| hsa-miR-212 | -            | MCM2         | MCM2   |
| hsa-miR-212 | MCM9         | -            | MCM9   |
| hsa-miR-212 | -            | MCOLN3       | MCOLN3 |
| hsa-miR-212 | -            | MDC1         | MDC1   |
| hsa-miR-212 | MECOM        | MECOM        | -      |
| hsa-miR-212 | MED17        | MED17        | -      |
| hsa-miR-212 | MED19        | MED19        | -      |
| hsa-miR-212 | MEF2A        | MEF2A        | -      |
| hsa-miR-212 | MEIS1        | MEIS1        | -      |
| hsa-miR-212 | -            | MELK         | MELK   |

|             |         |         |         |
|-------------|---------|---------|---------|
| hsa-miR-212 | MEPCE   | MEPCE   | -       |
| hsa-miR-212 | MET     | MET     | -       |
| hsa-miR-212 | METTL2A | METTL2A | -       |
| hsa-miR-212 | MEX3A   | MEX3A   | -       |
| hsa-miR-212 | MEX3C   | MEX3C   | -       |
| hsa-miR-212 | -       | MFAP1   | MFAP1   |
| hsa-miR-212 | -       | MFSD11  | MFSD11  |
| hsa-miR-212 | MFSD2A  | MFSD2A  | -       |
| hsa-miR-212 | MFSD8   | MFSD8   | -       |
| hsa-miR-212 | MGA     | MGA     | -       |
| hsa-miR-212 | -       | MICAL2  | MICAL2  |
| hsa-miR-212 | MID1IP1 | MID1IP1 | -       |
| hsa-miR-212 | -       | MIER1   | MIER1   |
| hsa-miR-212 | MIER3   | MIER3   | -       |
| hsa-miR-212 | MIS12   | MIS12   | -       |
| hsa-miR-212 | MITF    | MITF    | -       |
| hsa-miR-212 | -       | MLF1IP  | MLF1IP  |
| hsa-miR-212 | MLKL    | MLKL    | -       |
| hsa-miR-212 | MLLT10  | MLLT10  | -       |
| hsa-miR-212 | MLLT3   | MLLT3   | -       |
| hsa-miR-212 | MMGT1   | MMGT1   | -       |
| hsa-miR-212 | MMP14   | -       | MMP14   |
| hsa-miR-212 | MMP16   | MMP16   | -       |
| hsa-miR-212 | MMP8    | MMP8    | -       |
| hsa-miR-212 | MPEG1   | MPEG1   | -       |
| hsa-miR-212 | MRAS    | MRAS    | -       |
| hsa-miR-212 | MRPL35  | MRPL35  | -       |
| hsa-miR-212 | -       | MSH2    | MSH2    |
| hsa-miR-212 | MSL1    | MSL1    | -       |
| hsa-miR-212 | MSRB3   | MSRB3   | -       |
| hsa-miR-212 | -       | MTERFD3 | MTERFD3 |
| hsa-miR-212 | MTM1    | MTM1    | -       |
| hsa-miR-212 | -       | MTMR1   | MTMR1   |
| hsa-miR-212 | MTMR10  | MTMR10  | -       |
| hsa-miR-212 | -       | MX2     | MX2     |
| hsa-miR-212 | MXI1    | MXI1    | -       |
| hsa-miR-212 | MYD88   | MYD88   | -       |
| hsa-miR-212 | MYL9    | -       | MYL9    |
| hsa-miR-212 | MYLK3   | MYLK3   | -       |
| hsa-miR-212 | MYO1D   | MYO1D   | -       |
| hsa-miR-212 | MYO6    | MYO6    | -       |
| hsa-miR-212 | NAA25   | NAA25   | -       |
| hsa-miR-212 | NAB1    | NAB1    | -       |
| hsa-miR-212 | -       | NAT10   | NAT10   |
| hsa-miR-212 | NBEA    | NBEA    | -       |
| hsa-miR-212 | NCALD   | NCALD   | -       |
| hsa-miR-212 | NCKAP5L | NCKAP5L | -       |
| hsa-miR-212 | NCOA5   | -       | NCOA5   |
| hsa-miR-212 | NDE1    | NDE1    | -       |
| hsa-miR-212 | NDRG3   | NDRG3   | -       |
| hsa-miR-212 | NDRG4   | NDRG4   | -       |

|             |          |          |         |
|-------------|----------|----------|---------|
| hsa-miR-212 | -        | NDUFA5   | NDUFA5  |
| hsa-miR-212 | -        | NDUFB10  | NDUFB10 |
| hsa-miR-212 | -        | NEIL2    | NEIL2   |
| hsa-miR-212 | NET1     | NET1     | -       |
| hsa-miR-212 | NF1      | NF1      | -       |
| hsa-miR-212 | NFASC    | NFASC    | -       |
| hsa-miR-212 | NFIB     | -        | NFIB    |
| hsa-miR-212 | NFYA     | NFYA     | -       |
| hsa-miR-212 | NFYB     | NFYB     | -       |
| hsa-miR-212 | NGFR     | NGFR     | -       |
| hsa-miR-212 | NIPAL3   | NIPAL3   | -       |
| hsa-miR-212 | NIPAL4   | NIPAL4   | -       |
| hsa-miR-212 | NLRC5    | NLRC5    | -       |
| hsa-miR-212 | NMNAT2   | NMNAT2   | -       |
| hsa-miR-212 | NMT2     | NMT2     | -       |
| hsa-miR-212 | NOM1     | NOM1     | -       |
| hsa-miR-212 | NOVA1    | NOVA1    | -       |
| hsa-miR-212 | NPNT     | NPNT     | -       |
| hsa-miR-212 | NPY1R    | NPY1R    | -       |
| hsa-miR-212 | NR2C2    | NR2C2    | -       |
| hsa-miR-212 | NR2F2    | NR2F2    | -       |
| hsa-miR-212 | NR4A2    | NR4A2    | -       |
| hsa-miR-212 | NRBF2    | NRBF2    | -       |
| hsa-miR-212 | -        | NRG3     | NRG3    |
| hsa-miR-212 | -        | NTF3     | NTF3    |
| hsa-miR-212 | NTRK2    | NTRK2    | -       |
| hsa-miR-212 | NUDCD3   | NUDCD3   | -       |
| hsa-miR-212 | -        | NVL      | NVL     |
| hsa-miR-212 | OBFC1    | -        | OBFC1   |
| hsa-miR-212 | OCA2     | OCA2     | -       |
| hsa-miR-212 | OLFM1    | OLFM1    | -       |
| hsa-miR-212 | OPRL1    | -        | OPRL1   |
| hsa-miR-212 | -        | ORC6L    | ORC6L   |
| hsa-miR-212 | OSBPL8   | OSBPL8   | -       |
| hsa-miR-212 | OTUD3    | OTUD3    | -       |
| hsa-miR-212 | -        | OTUD4    | OTUD4   |
| hsa-miR-212 | P2RY11   | -        | P2RY11  |
| hsa-miR-212 | -        | PACRG    | PACRG   |
| hsa-miR-212 | PAFAH1B2 | PAFAH1B2 | -       |
| hsa-miR-212 | PALM2    | PALM2    | -       |
| hsa-miR-212 | PAM      | PAM      | -       |
| hsa-miR-212 | PAN3     | -        | PAN3    |
| hsa-miR-212 | -        | PANX1    | PANX1   |
| hsa-miR-212 | -        | PAPD5    | PAPD5   |
| hsa-miR-212 | PAPOLA   | PAPOLA   | -       |
| hsa-miR-212 | PARP14   | PARP14   | -       |
| hsa-miR-212 | PBOV1    | PBOV1    | -       |
| hsa-miR-212 | PCBD2    | PCBD2    | -       |
| hsa-miR-212 | PCDH10   | PCDH10   | -       |
| hsa-miR-212 | -        | PCDH15   | PCDH15  |
| hsa-miR-212 | PCGF3    | PCGF3    | -       |



|             |          |          |         |
|-------------|----------|----------|---------|
| hsa-miR-212 | PCYOX1   | PCYOX1   | -       |
| hsa-miR-212 | PDCL     | PDCL     | -       |
| hsa-miR-212 | PDE11A   | -        | PDE11A  |
| hsa-miR-212 | -        | PDE1C    | PDE1C   |
| hsa-miR-212 | PDE5A    | PDE5A    | -       |
| hsa-miR-212 | PDE6A    | -        | PDE6A   |
| hsa-miR-212 | PDE7A    | PDE7A    | -       |
| hsa-miR-212 | PDE7B    | PDE7B    | -       |
| hsa-miR-212 | PDIA3    | PDIA3    | -       |
| hsa-miR-212 | PDLIM2   | PDLIM2   | -       |
| hsa-miR-212 | -        | PDLIM4   | PDLIM4  |
| hsa-miR-212 | -        | PDSS1    | PDSS1   |
| hsa-miR-212 | PELI3    | PELI3    | -       |
| hsa-miR-212 | PEX5L    | PEX5L    | -       |
| hsa-miR-212 | PFN2     | PFN2     | -       |
| hsa-miR-212 | -        | PGA3     | PGA3    |
| hsa-miR-212 | -        | PGA4     | PGA4    |
| hsa-miR-212 | -        | PGA5     | PGA5    |
| hsa-miR-212 | PGF      | -        | PGF     |
| hsa-miR-212 | PGM3     | PGM3     | -       |
| hsa-miR-212 | PHACTR1  | -        | PHACTR1 |
| hsa-miR-212 | PHACTR4  | PHACTR4  | -       |
| hsa-miR-212 | PHC3     | PHC3     | -       |
| hsa-miR-212 | PHF20L1  | PHF20L1  | -       |
| hsa-miR-212 | PHF21B   | -        | PHF21B  |
| hsa-miR-212 | -        | PIGW     | PIGW    |
| hsa-miR-212 | -        | PIK3AP1  | PIK3AP1 |
| hsa-miR-212 | -        | PIK3CA   | PIK3CA  |
| hsa-miR-212 | PIK3R3   | PIK3R3   | -       |
| hsa-miR-212 | PIKFYVE  | PIKFYVE  | -       |
| hsa-miR-212 | -        | PKD1L1   | PKD1L1  |
| hsa-miR-212 | -        | PKN3     | PKN3    |
| hsa-miR-212 | PLA2G12A | PLA2G12A | -       |
| hsa-miR-212 | PLEKHA5  | PLEKHA5  | -       |
| hsa-miR-212 | PLIN1    | PLIN1    | -       |
| hsa-miR-212 | PLP1     | PLP1     | -       |
| hsa-miR-212 | PLXDC1   | PLXDC1   | -       |
| hsa-miR-212 | PML      | PML      | -       |
| hsa-miR-212 | -        | PMPCB    | PMPCB   |
| hsa-miR-212 | -        | PNN      | PNN     |
| hsa-miR-212 | -        | PNRC2    | PNRC2   |
| hsa-miR-212 | POFUT1   | POFUT1   | -       |
| hsa-miR-212 | POGZ     | POGZ     | -       |
| hsa-miR-212 | POLH     | POLH     | -       |
| hsa-miR-212 | POM121C  | POM121C  | -       |
| hsa-miR-212 | POU4F1   | POU4F1   | -       |
| hsa-miR-212 | PPAPDC3  | PPAPDC3  | -       |
| hsa-miR-212 | -        | PPIL5    | PPIL5   |
| hsa-miR-212 | PPM1B    | PPM1B    | -       |
| hsa-miR-212 | -        | PPM1G    | PPM1G   |
| hsa-miR-212 | PPM1K    | PPM1K    | -       |

|             |           |           |         |
|-------------|-----------|-----------|---------|
| hsa-miR-212 | PPP1R15B  | PPP1R15B  | -       |
| hsa-miR-212 | PPP2R5C   | PPP2R5C   | -       |
| hsa-miR-212 | PPP2R5E   | PPP2R5E   | -       |
| hsa-miR-212 | PPP3CA    | PPP3CA    | -       |
| hsa-miR-212 | PPPDE1    | PPPDE1    | -       |
| hsa-miR-212 | -         | PPRC1     | PPRC1   |
| hsa-miR-212 | -         | PRAME     | PRAME   |
| hsa-miR-212 | PRAMEF1   | -         | PRAMEF1 |
| hsa-miR-212 | -         | PRKAG2    | PRKAG2  |
| hsa-miR-212 | PRKD1     | PRKD1     | -       |
| hsa-miR-212 | PRPF19    | -         | PRPF19  |
| hsa-miR-212 | -         | PRPF4B    | PRPF4B  |
| hsa-miR-212 | PRPS2     | PRPS2     | -       |
| hsa-miR-212 | PRR11     | PRR11     | -       |
| hsa-miR-212 | PRR15     | -         | PRR15   |
| hsa-miR-212 | PRR5L     | PRR5L     | -       |
| hsa-miR-212 | PRRX2     | -         | PRRX2   |
| hsa-miR-212 | PSMA2     | PSMA2     | -       |
| hsa-miR-212 | PSMB8     | PSMB8     | -       |
| hsa-miR-212 | -         | PSMD1     | PSMD1   |
| hsa-miR-212 | -         | PSMD13    | PSMD13  |
| hsa-miR-212 | PTBP2     | PTBP2     | -       |
| hsa-miR-212 | PTCHD1    | PTCHD1    | -       |
| hsa-miR-212 | -         | PTCHD3    | PTCHD3  |
| hsa-miR-212 | -         | PTPN12    | PTPN12  |
| hsa-miR-212 | -         | PTPN4     | PTPN4   |
| hsa-miR-212 | PTPRD     | PTPRD     | -       |
| hsa-miR-212 | -         | PTRH1     | PTRH1   |
| hsa-miR-212 | PVRL1     | -         | PVRL1   |
| hsa-miR-212 | PVRL2     | PVRL2     | -       |
| hsa-miR-212 | PWWP2A    | PWWP2A    | -       |
| hsa-miR-212 | PXN       | PXN       | -       |
| hsa-miR-212 | ProSAPiP1 | ProSAPiP1 | -       |
| hsa-miR-212 | -         | QDPR      | QDPR    |
| hsa-miR-212 | QRSL1     | QRSL1     | -       |
| hsa-miR-212 | -         | RAB25     | RAB25   |
| hsa-miR-212 | -         | RAB28     | RAB28   |
| hsa-miR-212 | -         | RAB34     | RAB34   |
| hsa-miR-212 | RAB36     | RAB36     | -       |
| hsa-miR-212 | RAB6B     | RAB6B     | -       |
| hsa-miR-212 | RAD21     | RAD21     | -       |
| hsa-miR-212 | RAG1      | RAG1      | -       |
| hsa-miR-212 | RALGAPB   | RALGAPB   | -       |
| hsa-miR-212 | RALYL     | RALYL     | -       |
| hsa-miR-212 | RAP2B     | RAP2B     | -       |
| hsa-miR-212 | RAPGEF6   | RAPGEF6   | -       |
| hsa-miR-212 | RARB      | RARB      | -       |
| hsa-miR-212 | RASSF8    | RASSF8    | -       |
| hsa-miR-212 | RB1       | RB1       | -       |
| hsa-miR-212 | RBL1      | RBL1      | -       |
| hsa-miR-212 | RBM12     | RBM12     | -       |

|             |         |          |          |
|-------------|---------|----------|----------|
| hsa-miR-212 | -       | RBM14    | RBM14    |
| hsa-miR-212 | RBM20   | RBM20    | -        |
| hsa-miR-212 | RCOR3   | RCOR3    | -        |
| hsa-miR-212 | RFX3    | RFX3     | -        |
| hsa-miR-212 | RGS20   | RGS20    | -        |
| hsa-miR-212 | RGS6    | RGS6     | -        |
| hsa-miR-212 | RGS7BP  | RGS7BP   | -        |
| hsa-miR-212 | RHOBTB1 | RHOBTB1  | -        |
| hsa-miR-212 | RHOQ    | RHOQ     | -        |
| hsa-miR-212 | RIC3    | -        | RIC3     |
| hsa-miR-212 | RIF1    | RIF1     | -        |
| hsa-miR-212 | RIMS3   | -        | RIMS3    |
| hsa-miR-212 | -       | RIPK2    | RIPK2    |
| hsa-miR-212 | -       | RNASEH2B | RNASEH2B |
| hsa-miR-212 | -       | RNASEN   | RNASEN   |
| hsa-miR-212 | RND3    | RND3     | -        |
| hsa-miR-212 | RNF111  | RNF111   | -        |
| hsa-miR-212 | RNF150  | RNF150   | -        |
| hsa-miR-212 | RNF24   | RNF24    | -        |
| hsa-miR-212 | ROGDI   | -        | ROGDI    |
| hsa-miR-212 | RPE     | RPE      | -        |
| hsa-miR-212 | -       | RPH3A    | RPH3A    |
| hsa-miR-212 | -       | RPS14    | RPS14    |
| hsa-miR-212 | RS1     | RS1      | -        |
| hsa-miR-212 | RSL1D1  | RSL1D1   | -        |
| hsa-miR-212 | RTF1    | RTF1     | -        |
| hsa-miR-212 | RTN4IP1 | RTN4IP1  | -        |
| hsa-miR-212 | RUFY2   | RUFY2    | -        |
| hsa-miR-212 | RUFY3   | RUFY3    | -        |
| hsa-miR-212 | RUNX1   | RUNX1    | -        |
| hsa-miR-212 | -       | S100A2   | S100A2   |
| hsa-miR-212 | S100PBP | S100PBP  | -        |
| hsa-miR-212 | SALL1   | SALL1    | -        |
| hsa-miR-212 | SALL3   | SALL3    | -        |
| hsa-miR-212 | SAMD12  | SAMD12   | -        |
| hsa-miR-212 | SAP18   | SAP18    | -        |
| hsa-miR-212 | -       | SART3    | SART3    |
| hsa-miR-212 | SATB2   | SATB2    | -        |
| hsa-miR-212 | SCAMP1  | SCAMP1   | -        |
| hsa-miR-212 | -       | SCCPDH   | SCCPDH   |
| hsa-miR-212 | SCN11A  | SCN11A   | -        |
| hsa-miR-212 | SCN1A   | SCN1A    | -        |
| hsa-miR-212 | SCN3A   | SCN3A    | -        |
| hsa-miR-212 | -       | SDCBP    | SDCBP    |
| hsa-miR-212 | -       | SDF2     | SDF2     |
| hsa-miR-212 | SDK2    | SDK2     | -        |
| hsa-miR-212 | SEC14L2 | SEC14L2  | -        |
| hsa-miR-212 | SEC14L5 | SEC14L5  | -        |
| hsa-miR-212 | SEC16A  | SEC16A   | -        |
| hsa-miR-212 | SEC22C  | SEC22C   | -        |
| hsa-miR-212 | SEC61A1 | SEC61A1  | -        |

|             |          |          |          |
|-------------|----------|----------|----------|
| hsa-miR-212 | -        | SEMA4A   | SEMA4A   |
| hsa-miR-212 | SEMA6A   | SEMA6A   | -        |
| hsa-miR-212 | SEPSECS  | SEPSECS  | -        |
| hsa-miR-212 | SEPT11   | SEPT11   | -        |
| hsa-miR-212 | SERBP1   | SERBP1   | -        |
| hsa-miR-212 | SERP1    | SERP1    | -        |
| hsa-miR-212 | SERPINB8 | SERPINB8 | -        |
| hsa-miR-212 | SETD5    | SETD5    | -        |
| hsa-miR-212 | -        | SFMBT1   | SFMBT1   |
| hsa-miR-212 | SGK3     | SGK3     | -        |
| hsa-miR-212 | SHANK2   | SHANK2   | -        |
| hsa-miR-212 | -        | SHOX     | SHOX     |
| hsa-miR-212 | SIRT1    | SIRT1    | -        |
| hsa-miR-212 | SIRT5    | SIRT5    | -        |
| hsa-miR-212 | -        | SIT1     | SIT1     |
| hsa-miR-212 | SIX4     | SIX4     | -        |
| hsa-miR-212 | SKAP2    | SKAP2    | -        |
| hsa-miR-212 | -        | SLBP     | SLBP     |
| hsa-miR-212 | -        | SLC10A4  | SLC10A4  |
| hsa-miR-212 | SLC15A1  | SLC15A1  | -        |
| hsa-miR-212 | -        | SLC17A8  | SLC17A8  |
| hsa-miR-212 | SLC1A4   | SLC1A4   | -        |
| hsa-miR-212 | SLC22A23 | SLC22A23 | -        |
| hsa-miR-212 | SLC22A3  | SLC22A3  | -        |
| hsa-miR-212 | -        | SLC25A20 | SLC25A20 |
| hsa-miR-212 | -        | SLC25A25 | SLC25A25 |
| hsa-miR-212 | SLC25A36 | SLC25A36 | -        |
| hsa-miR-212 | SLC26A7  | SLC26A7  | -        |
| hsa-miR-212 | SLC28A1  | SLC28A1  | -        |
| hsa-miR-212 | SLC30A6  | SLC30A6  | -        |
| hsa-miR-212 | SLC31A1  | SLC31A1  | -        |
| hsa-miR-212 | -        | SLC35A1  | SLC35A1  |
| hsa-miR-212 | -        | SLC35B3  | SLC35B3  |
| hsa-miR-212 | -        | SLC35D2  | SLC35D2  |
| hsa-miR-212 | SLC35E3  | SLC35E3  | -        |
| hsa-miR-212 | SLC39A1  | SLC39A1  | -        |
| hsa-miR-212 | SLC5A9   | SLC5A9   | -        |
| hsa-miR-212 | SLC6A1   | SLC6A1   | -        |
| hsa-miR-212 | SLC6A3   | SLC6A3   | -        |
| hsa-miR-212 | SLC7A1   | SLC7A1   | -        |
| hsa-miR-212 | -        | SLC9A10  | SLC9A10  |
| hsa-miR-212 | SLFN5    | SLFN5    | -        |
| hsa-miR-212 | SMAD4    | SMAD4    | -        |
| hsa-miR-212 | SMAD5    | SMAD5    | -        |
| hsa-miR-212 | SMAD9    | SMAD9    | -        |
| hsa-miR-212 | -        | SMARCA4  | SMARCA4  |
| hsa-miR-212 | -        | SMOC2    | SMOC2    |
| hsa-miR-212 | SMPD3    | SMPD3    | -        |
| hsa-miR-212 | -        | SNX25    | SNX25    |
| hsa-miR-212 | -        | SNX7     | SNX7     |
| hsa-miR-212 | -        | SOD2     | SOD2     |

|             |         |         |        |
|-------------|---------|---------|--------|
| hsa-miR-212 | -       | SOS1    | SOS1   |
| hsa-miR-212 | SOX11   | SOX11   | -      |
| hsa-miR-212 | SOX4    | SOX4    | -      |
| hsa-miR-212 | SOX5    | SOX5    | -      |
| hsa-miR-212 | SOX6    | SOX6    | -      |
| hsa-miR-212 | SP100   | -       | SP100  |
| hsa-miR-212 | -       | SP110   | SP110  |
| hsa-miR-212 | SP8     | SP8     | -      |
| hsa-miR-212 | SPAST   | SPAST   | -      |
| hsa-miR-212 | -       | SPATS1  | SPATS1 |
| hsa-miR-212 | SPEN    | SPEN    | -      |
| hsa-miR-212 | SPIN1   | SPIN1   | -      |
| hsa-miR-212 | SPIN3   | SPIN3   | -      |
| hsa-miR-212 | SPNS2   | -       | SPNS2  |
| hsa-miR-212 | SPPL3   | SPPL3   | -      |
| hsa-miR-212 | SPRED1  | SPRED1  | -      |
| hsa-miR-212 | SPRY1   | SPRY1   | -      |
| hsa-miR-212 | SPTLC2  | SPTLC2  | -      |
| hsa-miR-212 | SRGAP1  | SRGAP1  | -      |
| hsa-miR-212 | SRGAP2  | SRGAP2  | -      |
| hsa-miR-212 | -       | SRP72   | SRP72  |
| hsa-miR-212 | SS18    | SS18    | -      |
| hsa-miR-212 | SSH1    | -       | SSH1   |
| hsa-miR-212 | SSH2    | SSH2    | -      |
| hsa-miR-212 | ST6GAL2 | ST6GAL2 | -      |
| hsa-miR-212 | ST8SIA2 | ST8SIA2 | -      |
| hsa-miR-212 | STAT2   | -       | STAT2  |
| hsa-miR-212 | -       | STAT4   | STAT4  |
| hsa-miR-212 | -       | STIM2   | STIM2  |
| hsa-miR-212 | STK19   | -       | STK19  |
| hsa-miR-212 | -       | STK39   | STK39  |
| hsa-miR-212 | STRA6   | STRA6   | -      |
| hsa-miR-212 | SUCLA2  | SUCLA2  | -      |
| hsa-miR-212 | SUFU    | SUFU    | -      |
| hsa-miR-212 | SUMO2   | SUMO2   | -      |
| hsa-miR-212 | SUPT7L  | SUPT7L  | -      |
| hsa-miR-212 | SV2A    | SV2A    | -      |
| hsa-miR-212 | SYNRG   | SYNRG   | -      |
| hsa-miR-212 | SYT15   | SYT15   | -      |
| hsa-miR-212 | SYT9    | SYT9    | -      |
| hsa-miR-212 | -       | SYTL4   | SYTL4  |
| hsa-miR-212 | TADA2B  | TADA2B  | -      |
| hsa-miR-212 | -       | TAF15   | TAF15  |
| hsa-miR-212 | TAF4B   | TAF4B   | -      |
| hsa-miR-212 | TAF8    | TAF8    | -      |
| hsa-miR-212 | TAF9B   | TAF9B   | -      |
| hsa-miR-212 | TANC2   | TANC2   | -      |
| hsa-miR-212 | TAOK3   | TAOK3   | -      |
| hsa-miR-212 | -       | TBC1D8  | TBC1D8 |
| hsa-miR-212 | TBC1D8B | TBC1D8B | -      |
| hsa-miR-212 | -       | TBC1D9  | TBC1D9 |

|             |          |          |         |
|-------------|----------|----------|---------|
| hsa-miR-212 | -        | TBCA     | TBCA    |
| hsa-miR-212 | TCEB1    | TCEB1    | -       |
| hsa-miR-212 | TCF7L2   | TCF7L2   | -       |
| hsa-miR-212 | TCP11L1  | TCP11L1  | -       |
| hsa-miR-212 | TECPR2   | TECPR2   | -       |
| hsa-miR-212 | -        | TEX11    | TEX11   |
| hsa-miR-212 | -        | TGFBI    | TGFBI   |
| hsa-miR-212 | -        | TGM3     | TGM3    |
| hsa-miR-212 | -        | THOC2    | THOC2   |
| hsa-miR-212 | TIFA     | TIFA     | -       |
| hsa-miR-212 | TLE4     | -        | TLE4    |
| hsa-miR-212 | TMEM106B | TMEM106B | -       |
| hsa-miR-212 | TMEM115  | TMEM115  | -       |
| hsa-miR-212 | TMEM117  | TMEM117  | -       |
| hsa-miR-212 | TMEM127  | TMEM127  | -       |
| hsa-miR-212 | TMEM132D | TMEM132D | -       |
| hsa-miR-212 | TMEM185B | TMEM185B | -       |
| hsa-miR-212 | TMEM42   | -        | TMEM42  |
| hsa-miR-212 | TMEM43   | TMEM43   | -       |
| hsa-miR-212 | TNP1     | -        | TNP1    |
| hsa-miR-212 | TNR      | -        | TNR     |
| hsa-miR-212 | TOLLIP   | TOLLIP   | -       |
| hsa-miR-212 | TOMM40L  | TOMM40L  | -       |
| hsa-miR-212 | TOX3     | TOX3     | -       |
| hsa-miR-212 | TPBG     | TPBG     | -       |
| hsa-miR-212 | -        | TPO      | TPO     |
| hsa-miR-212 | -        | TRIB1    | TRIB1   |
| hsa-miR-212 | TRIL     | TRIL     | -       |
| hsa-miR-212 | TRPM7    | TRPM7    | -       |
| hsa-miR-212 | TSC22D3  | TSC22D3  | -       |
| hsa-miR-212 | -        | TSHZ3    | TSHZ3   |
| hsa-miR-212 | TSN      | TSN      | -       |
| hsa-miR-212 | -        | TSPAN16  | TSPAN16 |
| hsa-miR-212 | TTC14    | TTC14    | -       |
| hsa-miR-212 | TTC39A   | TTC39A   | -       |
| hsa-miR-212 | TTLL2    | TTLL2    | -       |
| hsa-miR-212 | TTPAL    | TTPAL    | -       |
| hsa-miR-212 | TULP4    | TULP4    | -       |
| hsa-miR-212 | TUSC3    | TUSC3    | -       |
| hsa-miR-212 | TXLNA    | TXLNA    | -       |
| hsa-miR-212 | TXNDC15  | TXNDC15  | -       |
| hsa-miR-212 | -        | TXNL1    | TXNL1   |
| hsa-miR-212 | -        | UBAC2    | UBAC2   |
| hsa-miR-212 | -        | UBE2E2   | UBE2E2  |
| hsa-miR-212 | UBE2G2   | UBE2G2   | -       |
| hsa-miR-212 | UBE2H    | UBE2H    | -       |
| hsa-miR-212 | UBE2QL1  | UBE2QL1  | -       |
| hsa-miR-212 | UBE2R2   | UBE2R2   | -       |
| hsa-miR-212 | UBE2Z    | UBE2Z    | -       |
| hsa-miR-212 | UBN1     | UBN1     | -       |
| hsa-miR-212 | -        | UFD1L    | UFD1L   |

|             |         |         |         |
|-------------|---------|---------|---------|
| hsa-miR-212 | UNC13A  | UNC13A  | -       |
| hsa-miR-212 | UNC5CL  | UNC5CL  | -       |
| hsa-miR-212 | USP13   | USP13   | -       |
| hsa-miR-212 | USP38   | USP38   | -       |
| hsa-miR-212 | USP9Y   | USP9Y   | -       |
| hsa-miR-212 | UVRAG   | UVRAG   | -       |
| hsa-miR-212 | -       | VDAC2   | VDAC2   |
| hsa-miR-212 | -       | VEZT    | VEZT    |
| hsa-miR-212 | VGLL4   | VGLL4   | -       |
| hsa-miR-212 | VHL     | VHL     | -       |
| hsa-miR-212 | VOPP1   | VOPP1   | -       |
| hsa-miR-212 | VPS41   | VPS41   | -       |
| hsa-miR-212 | -       | WDR19   | WDR19   |
| hsa-miR-212 | WDR33   | WDR33   | -       |
| hsa-miR-212 | WDR37   | WDR37   | -       |
| hsa-miR-212 | WDR43   | WDR43   | -       |
| hsa-miR-212 | WDR5B   | WDR5B   | -       |
| hsa-miR-212 | WDR7    | WDR7    | -       |
| hsa-miR-212 | WHSC1L1 | WHSC1L1 | -       |
| hsa-miR-212 | -       | WTAP    | WTAP    |
| hsa-miR-212 | WWP2    | WWP2    | -       |
| hsa-miR-212 | XPNPEP3 | XPNPEP3 | -       |
| hsa-miR-212 | -       | YIF1A   | YIF1A   |
| hsa-miR-212 | YIPF5   | YIPF5   | -       |
| hsa-miR-212 | YKT6    | YKT6    | -       |
| hsa-miR-212 | YWHAG   | YWHAG   | -       |
| hsa-miR-212 | ZAK     | ZAK     | -       |
| hsa-miR-212 | -       | ZBTB10  | ZBTB10  |
| hsa-miR-212 | -       | ZBTB17  | ZBTB17  |
| hsa-miR-212 | ZBTB24  | ZBTB24  | -       |
| hsa-miR-212 | ZBTB34  | ZBTB34  | -       |
| hsa-miR-212 | ZBTB8B  | ZBTB8B  | -       |
| hsa-miR-212 | -       | ZC3H8   | ZC3H8   |
| hsa-miR-212 | -       | ZCCHC17 | ZCCHC17 |
| hsa-miR-212 | ZCCHC3  | ZCCHC3  | -       |
| hsa-miR-212 | -       | ZCCHC5  | ZCCHC5  |
| hsa-miR-212 | ZDHHC15 | ZDHHC15 | -       |
| hsa-miR-212 | ZDHHC2  | ZDHHC2  | -       |
| hsa-miR-212 | ZEB2    | ZEB2    | -       |
| hsa-miR-212 | ZFC3H1  | ZFC3H1  | -       |
| hsa-miR-212 | ZFP3    | ZFP3    | -       |
| hsa-miR-212 | ZKSCAN2 | ZKSCAN2 | -       |
| hsa-miR-212 | ZMIZ2   | ZMIZ2   | -       |
| hsa-miR-212 | -       | ZMYND8  | ZMYND8  |
| hsa-miR-212 | ZNF12   | ZNF12   | -       |
| hsa-miR-212 | -       | ZNF133  | ZNF133  |
| hsa-miR-212 | ZNF202  | ZNF202  | -       |
| hsa-miR-212 | ZNF236  | ZNF236  | -       |
| hsa-miR-212 | ZNF238  | ZNF238  | -       |
| hsa-miR-212 | ZNF24   | ZNF24   | -       |
| hsa-miR-212 | ZNF280C | ZNF280C | -       |

|              |         |           |           |
|--------------|---------|-----------|-----------|
| hsa-miR-212  | ZNF292  | ZNF292    | -         |
| hsa-miR-212  | ZNF322A | ZNF322A   | -         |
| hsa-miR-212  | ZNF362  | ZNF362    | -         |
| hsa-miR-212  | ZNF395  | ZNF395    | -         |
| hsa-miR-212  | ZNF507  | ZNF507    | -         |
| hsa-miR-212  | ZNF518A | ZNF518A   | -         |
| hsa-miR-212  | ZNF566  | ZNF566    | -         |
| hsa-miR-212  | ZNF609  | ZNF609    | -         |
| hsa-miR-212  | ZNF621  | -         | ZNF621    |
| hsa-miR-212  | ZNF655  | ZNF655    | -         |
| hsa-miR-212  | -       | ZNF695    | ZNF695    |
| hsa-miR-212  | ZNF706  | ZNF706    | -         |
| hsa-miR-212  | ZSWIM6  | ZSWIM6    | -         |
| hsa-miR-212  | ZXDC    | ZXDC      | -         |
| hsa-miR-212  | ZYG11A  | ZYG11A    | -         |
| hsa-miR-221* | -       | ACACB     | ACACB     |
| hsa-miR-221* | -       | ACY3      | ACY3      |
| hsa-miR-221* | -       | ADAMTS9   | ADAMTS9   |
| hsa-miR-221* | -       | ADCY5     | ADCY5     |
| hsa-miR-221* | -       | ADM       | ADM       |
| hsa-miR-221* | -       | ADORA2B   | ADORA2B   |
| hsa-miR-221* | -       | ADRA1B    | ADRA1B    |
| hsa-miR-221* | -       | ALDH3B2   | ALDH3B2   |
| hsa-miR-221* | -       | ANKRD18A  | ANKRD18A  |
| hsa-miR-221* | -       | ANKS3     | ANKS3     |
| hsa-miR-221* | -       | AP1S1     | AP1S1     |
| hsa-miR-221* | -       | ATE1      | ATE1      |
| hsa-miR-221* | -       | ATXN7L1   | ATXN7L1   |
| hsa-miR-221* | -       | ATXN7L3   | ATXN7L3   |
| hsa-miR-221* | -       | BAALC     | BAALC     |
| hsa-miR-221* | -       | BBS9      | BBS9      |
| hsa-miR-221* | -       | BRPF3     | BRPF3     |
| hsa-miR-221* | -       | C10orf110 | C10orf110 |
| hsa-miR-221* | -       | C10orf58  | C10orf58  |
| hsa-miR-221* | -       | C10orf79  | C10orf79  |
| hsa-miR-221* | -       | C12orf54  | C12orf54  |
| hsa-miR-221* | -       | C12orf57  | C12orf57  |
| hsa-miR-221* | -       | C1QTNF2   | C1QTNF2   |
| hsa-miR-221* | -       | C1orf57   | C1orf57   |
| hsa-miR-221* | -       | C20orf103 | C20orf103 |
| hsa-miR-221* | -       | C6orf204  | C6orf204  |
| hsa-miR-221* | -       | C9        | C9        |
| hsa-miR-221* | -       | CABP1     | CABP1     |
| hsa-miR-221* | -       | CABP5     | CABP5     |
| hsa-miR-221* | -       | CADPS2    | CADPS2    |
| hsa-miR-221* | -       | CAMK1D    | CAMK1D    |
| hsa-miR-221* | -       | CAMK1G    | CAMK1G    |
| hsa-miR-221* | -       | CASP7     | CASP7     |
| hsa-miR-221* | -       | CBWD3     | CBWD3     |
| hsa-miR-221* | -       | CBWD5     | CBWD5     |
| hsa-miR-221* | -       | CBWD6     | CBWD6     |



|              |   |         |         |
|--------------|---|---------|---------|
| hsa-miR-221* | - | CBX6    | CBX6    |
| hsa-miR-221* | - | CCDC33  | CCDC33  |
| hsa-miR-221* | - | CCDC75  | CCDC75  |
| hsa-miR-221* | - | CCDC99  | CCDC99  |
| hsa-miR-221* | - | CCT3    | CCT3    |
| hsa-miR-221* | - | CD68    | CD68    |
| hsa-miR-221* | - | CECR2   | CECR2   |
| hsa-miR-221* | - | CFH     | CFH     |
| hsa-miR-221* | - | CHRM5   | CHRM5   |
| hsa-miR-221* | - | CHST5   | CHST5   |
| hsa-miR-221* | - | CKAP2L  | CKAP2L  |
| hsa-miR-221* | - | CLCNKA  | CLCNKA  |
| hsa-miR-221* | - | CNGA3   | CNGA3   |
| hsa-miR-221* | - | COIL    | COIL    |
| hsa-miR-221* | - | COL5A3  | COL5A3  |
| hsa-miR-221* | - | CPN1    | CPN1    |
| hsa-miR-221* | - | CST2    | CST2    |
| hsa-miR-221* | - | CSTF2   | CSTF2   |
| hsa-miR-221* | - | DDX17   | DDX17   |
| hsa-miR-221* | - | DDX31   | DDX31   |
| hsa-miR-221* | - | DIS3L2  | DIS3L2  |
| hsa-miR-221* | - | DNAJC16 | DNAJC16 |
| hsa-miR-221* | - | DPEP1   | DPEP1   |
| hsa-miR-221* | - | DTD1    | DTD1    |
| hsa-miR-221* | - | EI24    | EI24    |
| hsa-miR-221* | - | EPO     | EPO     |
| hsa-miR-221* | - | EXOC6   | EXOC6   |
| hsa-miR-221* | - | FAM46B  | FAM46B  |
| hsa-miR-221* | - | FAM64A  | FAM64A  |
| hsa-miR-221* | - | FGF1    | FGF1    |
| hsa-miR-221* | - | FNTB    | FNTB    |
| hsa-miR-221* | - | FOXQ1   | FOXQ1   |
| hsa-miR-221* | - | FOXRED1 | FOXRED1 |
| hsa-miR-221* | - | FPGS    | FPGS    |
| hsa-miR-221* | - | GEMIN6  | GEMIN6  |
| hsa-miR-221* | - | GEMIN8  | GEMIN8  |
| hsa-miR-221* | - | GFOD2   | GFOD2   |
| hsa-miR-221* | - | GGT2    | GGT2    |
| hsa-miR-221* | - | GGT6    | GGT6    |
| hsa-miR-221* | - | GLTSCR1 | GLTSCR1 |
| hsa-miR-221* | - | GNA15   | GNA15   |
| hsa-miR-221* | - | GOLT1A  | GOLT1A  |
| hsa-miR-221* | - | GRIK2   | GRIK2   |
| hsa-miR-221* | - | GRIK3   | GRIK3   |
| hsa-miR-221* | - | GSG1    | GSG1    |
| hsa-miR-221* | - | GTDC1   | GTDC1   |
| hsa-miR-221* | - | HCG9    | HCG9    |
| hsa-miR-221* | - | HDAC1   | HDAC1   |
| hsa-miR-221* | - | HES3    | HES3    |
| hsa-miR-221* | - | IFI27   | IFI27   |
| hsa-miR-221* | - | IGLL1   | IGLL1   |

|              |   |          |          |
|--------------|---|----------|----------|
| hsa-miR-221* | - | IGSF1    | IGSF1    |
| hsa-miR-221* | - | IQCH     | IQCH     |
| hsa-miR-221* | - | ITGB1    | ITGB1    |
| hsa-miR-221* | - | KCNH3    | KCNH3    |
| hsa-miR-221* | - | KCNJ4    | KCNJ4    |
| hsa-miR-221* | - | KIAA0100 | KIAA0100 |
| hsa-miR-221* | - | KIAA0141 | KIAA0141 |
| hsa-miR-221* | - | KNDC1    | KNDC1    |
| hsa-miR-221* | - | KRT35    | KRT35    |
| hsa-miR-221* | - | KRT75    | KRT75    |
| hsa-miR-221* | - | KRT84    | KRT84    |
| hsa-miR-221* | - | KRTAP4-5 | KRTAP4-5 |
| hsa-miR-221* | - | LAMC2    | LAMC2    |
| hsa-miR-221* | - | LEPREL2  | LEPREL2  |
| hsa-miR-221* | - | LILRA1   | LILRA1   |
| hsa-miR-221* | - | LRP1     | LRP1     |
| hsa-miR-221* | - | LRRTM2   | LRRTM2   |
| hsa-miR-221* | - | LYPD3    | LYPD3    |
| hsa-miR-221* | - | MANBA    | MANBA    |
| hsa-miR-221* | - | MBTD1    | MBTD1    |
| hsa-miR-221* | - | MEIS1    | MEIS1    |
| hsa-miR-221* | - | MEIS2    | MEIS2    |
| hsa-miR-221* | - | METT11D1 | METT11D1 |
| hsa-miR-221* | - | MGAM     | MGAM     |
| hsa-miR-221* | - | MKI67IP  | MKI67IP  |
| hsa-miR-221* | - | MST1R    | MST1R    |
| hsa-miR-221* | - | MT3      | MT3      |
| hsa-miR-221* | - | MXD3     | MXD3     |
| hsa-miR-221* | - | NCR3     | NCR3     |
| hsa-miR-221* | - | NDUFS2   | NDUFS2   |
| hsa-miR-221* | - | NEFH     | NEFH     |
| hsa-miR-221* | - | NFASC    | NFASC    |
| hsa-miR-221* | - | NFATC3   | NFATC3   |
| hsa-miR-221* | - | NGFRAP1  | NGFRAP1  |
| hsa-miR-221* | - | NINJ2    | NINJ2    |
| hsa-miR-221* | - | NME3     | NME3     |
| hsa-miR-221* | - | NOB1     | NOB1     |
| hsa-miR-221* | - | NOTCH4   | NOTCH4   |
| hsa-miR-221* | - | NPDC1    | NPDC1    |
| hsa-miR-221* | - | NPVF     | NPVF     |
| hsa-miR-221* | - | NR2F6    | NR2F6    |
| hsa-miR-221* | - | NRIP3    | NRIP3    |
| hsa-miR-221* | - | NXF1     | NXF1     |
| hsa-miR-221* | - | PABPC1   | PABPC1   |
| hsa-miR-221* | - | PAXIP1   | PAXIP1   |
| hsa-miR-221* | - | PCBD1    | PCBD1    |
| hsa-miR-221* | - | PCBP2    | PCBP2    |
| hsa-miR-221* | - | PCSK9    | PCSK9    |
| hsa-miR-221* | - | PDLIM2   | PDLIM2   |
| hsa-miR-221* | - | PDLIM7   | PDLIM7   |
| hsa-miR-221* | - | PHF21A   | PHF21A   |

|              |   |          |          |
|--------------|---|----------|----------|
| hsa-miR-221* | - | PMM2     | PMM2     |
| hsa-miR-221* | - | PPHLN1   | PPHLN1   |
| hsa-miR-221* | - | PPIL4    | PPIL4    |
| hsa-miR-221* | - | PPM1B    | PPM1B    |
| hsa-miR-221* | - | PPP1R1B  | PPP1R1B  |
| hsa-miR-221* | - | PRDX1    | PRDX1    |
| hsa-miR-221* | - | PRICKLE1 | PRICKLE1 |
| hsa-miR-221* | - | PRKCZ    | PRKCZ    |
| hsa-miR-221* | - | PRUNE    | PRUNE    |
| hsa-miR-221* | - | PRY      | PRY      |
| hsa-miR-221* | - | PTGER3   | PTGER3   |
| hsa-miR-221* | - | PUS3     | PUS3     |
| hsa-miR-221* | - | QSOX1    | QSOX1    |
| hsa-miR-221* | - | RAB17    | RAB17    |
| hsa-miR-221* | - | RAPGEF3  | RAPGEF3  |
| hsa-miR-221* | - | RASIP1   | RASIP1   |
| hsa-miR-221* | - | RBP5     | RBP5     |
| hsa-miR-221* | - | REC8     | REC8     |
| hsa-miR-221* | - | RGN      | RGN      |
| hsa-miR-221* | - | RGS3     | RGS3     |
| hsa-miR-221* | - | RPH3A    | RPH3A    |
| hsa-miR-221* | - | RSU1     | RSU1     |
| hsa-miR-221* | - | RUSC2    | RUSC2    |
| hsa-miR-221* | - | RWDD3    | RWDD3    |
| hsa-miR-221* | - | SCO1     | SCO1     |
| hsa-miR-221* | - | SEMA5B   | SEMA5B   |
| hsa-miR-221* | - | SEMA7A   | SEMA7A   |
| hsa-miR-221* | - | SLC27A3  | SLC27A3  |
| hsa-miR-221* | - | SLC35D2  | SLC35D2  |
| hsa-miR-221* | - | SLC39A10 | SLC39A10 |
| hsa-miR-221* | - | SLC9A5   | SLC9A5   |
| hsa-miR-221* | - | SLN      | SLN      |
| hsa-miR-221* | - | SORCS1   | SORCS1   |
| hsa-miR-221* | - | SOX18    | SOX18    |
| hsa-miR-221* | - | SPATA4   | SPATA4   |
| hsa-miR-221* | - | SRRM1    | SRRM1    |
| hsa-miR-221* | - | STRN4    | STRN4    |
| hsa-miR-221* | - | SVEP1    | SVEP1    |
| hsa-miR-221* | - | SYNGR1   | SYNGR1   |
| hsa-miR-221* | - | T        | T        |
| hsa-miR-221* | - | TAOK2    | TAOK2    |
| hsa-miR-221* | - | TAPT1    | TAPT1    |
| hsa-miR-221* | - | TBC1D7   | TBC1D7   |
| hsa-miR-221* | - | TCEAL3   | TCEAL3   |
| hsa-miR-221* | - | TCEAL6   | TCEAL6   |
| hsa-miR-221* | - | TCF7     | TCF7     |
| hsa-miR-221* | - | TDH      | TDH      |
| hsa-miR-221* | - | TFF3     | TFF3     |
| hsa-miR-221* | - | TGFBRAP1 | TGFBRAP1 |
| hsa-miR-221* | - | TGM1     | TGM1     |
| hsa-miR-221* | - | TGM2     | TGM2     |

|              |         |          |          |
|--------------|---------|----------|----------|
| hsa-miR-221* | -       | TIMM10   | TIMM10   |
| hsa-miR-221* | -       | TM7SF4   | TM7SF4   |
| hsa-miR-221* | -       | TMED1    | TMED1    |
| hsa-miR-221* | -       | TMEM101  | TMEM101  |
| hsa-miR-221* | -       | TMEM161A | TMEM161A |
| hsa-miR-221* | -       | TMEM165  | TMEM165  |
| hsa-miR-221* | -       | TMEM17   | TMEM17   |
| hsa-miR-221* | -       | TMEM95   | TMEM95   |
| hsa-miR-221* | -       | TNPO2    | TNPO2    |
| hsa-miR-221* | -       | TRAF4    | TRAF4    |
| hsa-miR-221* | -       | TRAPPC3  | TRAPPC3  |
| hsa-miR-221* | -       | TRIM46   | TRIM46   |
| hsa-miR-221* | -       | TRIM9    | TRIM9    |
| hsa-miR-221* | -       | TSPAN16  | TSPAN16  |
| hsa-miR-221* | -       | TTC12    | TTC12    |
| hsa-miR-221* | -       | UBQLN2   | UBQLN2   |
| hsa-miR-221* | -       | UPP1     | UPP1     |
| hsa-miR-221* | -       | USH1C    | USH1C    |
| hsa-miR-221* | -       | VAC14    | VAC14    |
| hsa-miR-221* | -       | VTI1B    | VTI1B    |
| hsa-miR-221* | -       | VWA2     | VWA2     |
| hsa-miR-221* | -       | WARS2    | WARS2    |
| hsa-miR-221* | -       | WDR45    | WDR45    |
| hsa-miR-221* | -       | ZCCHC11  | ZCCHC11  |
| hsa-miR-221* | -       | ZDHHC24  | ZDHHC24  |
| hsa-miR-221* | -       | ZMYND17  | ZMYND17  |
| hsa-miR-221* | -       | ZNF337   | ZNF337   |
| hsa-miR-221* | -       | ZNF397   | ZNF397   |
| hsa-miR-221* | -       | ZNF695   | ZNF695   |
| hsa-miR-221* | -       | ZNHIT1   | ZNHIT1   |
| hsa-miR-221* | -       | ZNRF2    | ZNRF2    |
| hsa-miR-224  | -       | AACS     | AACS     |
| hsa-miR-224  | -       | AADAT    | AADAT    |
| hsa-miR-224  | -       | AATF     | AATF     |
| hsa-miR-224  | -       | ABCA3    | ABCA3    |
| hsa-miR-224  | -       | ABHD5    | ABHD5    |
| hsa-miR-224  | -       | ACAT1    | ACAT1    |
| hsa-miR-224  | ACIN1   | ACIN1    | -        |
| hsa-miR-224  | ACSL4   | ACSL4    | -        |
| hsa-miR-224  | -       | ACTR3B   | ACTR3B   |
| hsa-miR-224  | ADAM17  | ADAM17   | -        |
| hsa-miR-224  | -       | ADAMDEC1 | ADAMDEC1 |
| hsa-miR-224  | ADAMTS5 | ADAMTS5  | -        |
| hsa-miR-224  | -       | ADAMTSL4 | ADAMTSL4 |
| hsa-miR-224  | ADD2    | ADD2     | -        |
| hsa-miR-224  | -       | ADRA1B   | ADRA1B   |
| hsa-miR-224  | AFF3    | AFF3     | -        |
| hsa-miR-224  | AFF4    | AFF4     | -        |
| hsa-miR-224  | AGRN    | AGRN     | -        |
| hsa-miR-224  | -       | AHSG     | AHSG     |
| hsa-miR-224  | -       | AK7      | AK7      |

|             |          |          |          |
|-------------|----------|----------|----------|
| hsa-miR-224 | AKIRIN1  | AKIRIN1  | -        |
| hsa-miR-224 | -        | ALS2CR8  | ALS2CR8  |
| hsa-miR-224 | AMMECR1  | AMMECR1  | -        |
| hsa-miR-224 | -        | ANAPC1   | ANAPC1   |
| hsa-miR-224 | -        | ANGPTL1  | ANGPTL1  |
| hsa-miR-224 | ANKRD12  | ANKRD12  | -        |
| hsa-miR-224 | ANKRD40  | ANKRD40  | -        |
| hsa-miR-224 | -        | ANKRD49  | ANKRD49  |
| hsa-miR-224 | -        | AP3M1    | AP3M1    |
| hsa-miR-224 | APBA2    | APBA2    | -        |
| hsa-miR-224 | -        | APOL2    | APOL2    |
| hsa-miR-224 | -        | APOL3    | APOL3    |
| hsa-miR-224 | -        | ARHGAP9  | ARHGAP9  |
| hsa-miR-224 | ARHGEF12 | ARHGEF12 | -        |
| hsa-miR-224 | -        | ARHGEF9  | ARHGEF9  |
| hsa-miR-224 | ARL1     | ARL1     | -        |
| hsa-miR-224 | -        | ARL4D    | ARL4D    |
| hsa-miR-224 | ASB7     | ASB7     | -        |
| hsa-miR-224 | -        | ASCC1    | ASCC1    |
| hsa-miR-224 | ASCL4    | ASCL4    | -        |
| hsa-miR-224 | -        | ASH2L    | ASH2L    |
| hsa-miR-224 | -        | ASS1     | ASS1     |
| hsa-miR-224 | -        | ATF2     | ATF2     |
| hsa-miR-224 | -        | ATP1B3   | ATP1B3   |
| hsa-miR-224 | ATP2B4   | ATP2B4   | -        |
| hsa-miR-224 | -        | ATP6V0E2 | ATP6V0E2 |
| hsa-miR-224 | -        | ATPAF2   | ATPAF2   |
| hsa-miR-224 | AZIN1    | AZIN1    | -        |
| hsa-miR-224 | -        | BARX1    | BARX1    |
| hsa-miR-224 | BAZ2A    | BAZ2A    | -        |
| hsa-miR-224 | -        | BEST3    | BEST3    |
| hsa-miR-224 | -        | BRCA1    | BRCA1    |
| hsa-miR-224 | BRPF3    | BRPF3    | -        |
| hsa-miR-224 | -        | BTBD8    | BTBD8    |
| hsa-miR-224 | -        | BTN2A3   | BTN2A3   |
| hsa-miR-224 | -        | C12orf11 | C12orf11 |
| hsa-miR-224 | -        | C12orf57 | C12orf57 |
| hsa-miR-224 | C12orf73 | C12orf73 | -        |
| hsa-miR-224 | -        | C14orf49 | C14orf49 |
| hsa-miR-224 | -        | C15orf43 | C15orf43 |
| hsa-miR-224 | C17orf39 | C17orf39 | -        |
| hsa-miR-224 | -        | C17orf80 | C17orf80 |
| hsa-miR-224 | C18orf25 | C18orf25 | -        |
| hsa-miR-224 | -        | C19orf24 | C19orf24 |
| hsa-miR-224 | C19orf47 | C19orf47 | -        |
| hsa-miR-224 | -        | C19orf57 | C19orf57 |
| hsa-miR-224 | -        | C1orf128 | C1orf128 |
| hsa-miR-224 | -        | C1orf51  | C1orf51  |
| hsa-miR-224 | C1orf52  | C1orf52  | -        |
| hsa-miR-224 | C1orf9   | C1orf9   | -        |
| hsa-miR-224 | -        | C2orf34  | C2orf34  |

|             |         |         |         |
|-------------|---------|---------|---------|
| hsa-miR-224 | -       | C3orf57 | C3orf57 |
| hsa-miR-224 | -       | C5orf32 | C5orf32 |
| hsa-miR-224 | -       | C5orf34 | C5orf34 |
| hsa-miR-224 | C5orf41 | C5orf41 | -       |
| hsa-miR-224 | -       | C6      | C6      |
| hsa-miR-224 | -       | C8orf40 | C8orf40 |
| hsa-miR-224 | C8orf44 | C8orf44 | -       |
| hsa-miR-224 | -       | C9orf11 | C9orf11 |
| hsa-miR-224 | -       | C9orf6  | C9orf6  |
| hsa-miR-224 | -       | C9orf84 | C9orf84 |
| hsa-miR-224 | -       | CA2     | CA2     |
| hsa-miR-224 | CASC3   | CASC3   | -       |
| hsa-miR-224 | CBX6    | CBX6    | -       |
| hsa-miR-224 | CBX7    | CBX7    | -       |
| hsa-miR-224 | -       | CCDC99  | CCDC99  |
| hsa-miR-224 | -       | CDADC1  | CDADC1  |
| hsa-miR-224 | -       | CDH23   | CDH23   |
| hsa-miR-224 | -       | CDKN1A  | CDKN1A  |
| hsa-miR-224 | CDS2    | CDS2    | -       |
| hsa-miR-224 | -       | CENPI   | CENPI   |
| hsa-miR-224 | -       | CER1    | CER1    |
| hsa-miR-224 | -       | CFHR5   | CFHR5   |
| hsa-miR-224 | -       | CHKA    | CHKA    |
| hsa-miR-224 | -       | CHN1    | CHN1    |
| hsa-miR-224 | CHP2    | CHP2    | -       |
| hsa-miR-224 | -       | CHRN1   | CHRN1   |
| hsa-miR-224 | -       | CKS1B   | CKS1B   |
| hsa-miR-224 | -       | CLDN14  | CLDN14  |
| hsa-miR-224 | COBLL1  | COBLL1  | -       |
| hsa-miR-224 | -       | COL5A3  | COL5A3  |
| hsa-miR-224 | -       | COL7A1  | COL7A1  |
| hsa-miR-224 | -       | COMMD10 | COMMD10 |
| hsa-miR-224 | CORO1C  | CORO1C  | -       |
| hsa-miR-224 | -       | CPNE6   | CPNE6   |
| hsa-miR-224 | CPNE8   | CPNE8   | -       |
| hsa-miR-224 | CREBZF  | CREBZF  | -       |
| hsa-miR-224 | -       | CRIPAK  | CRIPAK  |
| hsa-miR-224 | CRKL    | CRKL    | -       |
| hsa-miR-224 | -       | CRYAB   | CRYAB   |
| hsa-miR-224 | -       | CTHRC1  | CTHRC1  |
| hsa-miR-224 | -       | CUTC    | CUTC    |
| hsa-miR-224 | CYBASC3 | CYBASC3 | -       |
| hsa-miR-224 | -       | CYP2J2  | CYP2J2  |
| hsa-miR-224 | -       | CYP4A11 | CYP4A11 |
| hsa-miR-224 | -       | CYP4A22 | CYP4A22 |
| hsa-miR-224 | -       | DDIT3   | DDIT3   |
| hsa-miR-224 | -       | DDX28   | DDX28   |
| hsa-miR-224 | DDX3X   | DDX3X   | -       |
| hsa-miR-224 | DDX42   | DDX42   | -       |
| hsa-miR-224 | -       | DDX5    | DDX5    |
| hsa-miR-224 | -       | DEC1    | DEC1    |

|             |          |          |        |
|-------------|----------|----------|--------|
| hsa-miR-224 | -        | DEGS1    | DEGS1  |
| hsa-miR-224 | DENND5B  | DENND5B  | -      |
| hsa-miR-224 | -        | DGAT2    | DGAT2  |
| hsa-miR-224 | -        | DHX38    | DHX38  |
| hsa-miR-224 | DIO1     | DIO1     | -      |
| hsa-miR-224 | -        | DLGAP1   | DLGAP1 |
| hsa-miR-224 | -        | DNAH17   | DNAH17 |
| hsa-miR-224 | DPP8     | DPP8     | -      |
| hsa-miR-224 | -        | DSG2     | DSG2   |
| hsa-miR-224 | -        | DUSP16   | DUSP16 |
| hsa-miR-224 | -        | ECHDC3   | ECHDC3 |
| hsa-miR-224 | ECT2     | ECT2     | -      |
| hsa-miR-224 | EFNA3    | EFNA3    | -      |
| hsa-miR-224 | -        | EFNB3    | EFNB3  |
| hsa-miR-224 | EGR2     | EGR2     | -      |
| hsa-miR-224 | EIF5A2   | EIF5A2   | -      |
| hsa-miR-224 | -        | ELMO2    | ELMO2  |
| hsa-miR-224 | -        | ELOVL4   | ELOVL4 |
| hsa-miR-224 | -        | ELOVL5   | ELOVL5 |
| hsa-miR-224 | ENC1     | ENC1     | -      |
| hsa-miR-224 | -        | EPGN     | EPGN   |
| hsa-miR-224 | -        | ESX1     | ESX1   |
| hsa-miR-224 | EXOC5    | EXOC5    | -      |
| hsa-miR-224 | EYA4     | EYA4     | -      |
| hsa-miR-224 | -        | F2RL1    | F2RL1  |
| hsa-miR-224 | FAM120C  | FAM120C  | -      |
| hsa-miR-224 | FAM135B  | FAM135B  | -      |
| hsa-miR-224 | FAM177A1 | FAM177A1 | -      |
| hsa-miR-224 | -        | FAM38B   | FAM38B |
| hsa-miR-224 | -        | FAM46D   | FAM46D |
| hsa-miR-224 | -        | FAM64A   | FAM64A |
| hsa-miR-224 | -        | FAS      | FAS    |
| hsa-miR-224 | FBXL5    | FBXL5    | -      |
| hsa-miR-224 | -        | FGD3     | FGD3   |
| hsa-miR-224 | -        | FGD4     | FGD4   |
| hsa-miR-224 | -        | FHL2     | FHL2   |
| hsa-miR-224 | -        | FLRT1    | FLRT1  |
| hsa-miR-224 | FNDC5    | FNDC5    | -      |
| hsa-miR-224 | FOSB     | -        | FOSB   |
| hsa-miR-224 | FZD5     | FZD5     | -      |
| hsa-miR-224 | GABRE    | GABRE    | -      |
| hsa-miR-224 | GALNT2   | GALNT2   | -      |
| hsa-miR-224 | -        | GCC1     | GCC1   |
| hsa-miR-224 | GCH1     | GCH1     | -      |
| hsa-miR-224 | GDF11    | GDF11    | -      |
| hsa-miR-224 | -        | GDF5     | GDF5   |
| hsa-miR-224 | GGA3     | GGA3     | -      |
| hsa-miR-224 | GGNBP2   | GGNBP2   | -      |
| hsa-miR-224 | GIGYF2   | GIGYF2   | -      |
| hsa-miR-224 | -        | GLS2     | GLS2   |
| hsa-miR-224 | GNAI3    | GNAI3    | -      |

|             |         |          |          |
|-------------|---------|----------|----------|
| hsa-miR-224 | GPC4    | GPC4     | -        |
| hsa-miR-224 | -       | GPC5     | GPC5     |
| hsa-miR-224 | GPM6A   | GPM6A    | -        |
| hsa-miR-224 | -       | GPR109A  | GPR109A  |
| hsa-miR-224 | -       | GPR109B  | GPR109B  |
| hsa-miR-224 | -       | GPR137C  | GPR137C  |
| hsa-miR-224 | GPR180  | GPR180   | -        |
| hsa-miR-224 | -       | GRB14    | GRB14    |
| hsa-miR-224 | GRIA4   | GRIA4    | -        |
| hsa-miR-224 | -       | GRRP1    | GRRP1    |
| hsa-miR-224 | -       | GSPT2    | GSPT2    |
| hsa-miR-224 | GTPBP2  | GTPBP2   | -        |
| hsa-miR-224 | GTSF1   | GTSF1    | -        |
| hsa-miR-224 | -       | GZMA     | GZMA     |
| hsa-miR-224 | -       | H2BFWT   | H2BFWT   |
| hsa-miR-224 | H3F3B   | H3F3B    | -        |
| hsa-miR-224 | HERC4   | HERC4    | -        |
| hsa-miR-224 | HHLA1   | HHLA1    | -        |
| hsa-miR-224 | HHLA2   | HHLA2    | -        |
| hsa-miR-224 | HIPK3   | HIPK3    | -        |
| hsa-miR-224 | -       | HLA-B    | HLA-B    |
| hsa-miR-224 | -       | HLA-C    | HLA-C    |
| hsa-miR-224 | -       | HLA-G    | HLA-G    |
| hsa-miR-224 | -       | HLA-J    | HLA-J    |
| hsa-miR-224 | -       | HMGCLL1  | HMGCLL1  |
| hsa-miR-224 | HNRNPC  | HNRNPC   | -        |
| hsa-miR-224 | HNRNPF  | HNRNPF   | -        |
| hsa-miR-224 | HNRNPU  | HNRNPU   | -        |
| hsa-miR-224 | -       | HPDL     | HPDL     |
| hsa-miR-224 | -       | HS3ST2   | HS3ST2   |
| hsa-miR-224 | -       | HSD17B11 | HSD17B11 |
| hsa-miR-224 | HSPC159 | HSPC159  | -        |
| hsa-miR-224 | ID3     | ID3      | -        |
| hsa-miR-224 | IGDCC3  | IGDCC3   | -        |
| hsa-miR-224 | -       | IL11     | IL11     |
| hsa-miR-224 | -       | IL1F9    | IL1F9    |
| hsa-miR-224 | IL1RN   | IL1RN    | -        |
| hsa-miR-224 | -       | INPP5F   | INPP5F   |
| hsa-miR-224 | IRF2BP2 | IRF2BP2  | -        |
| hsa-miR-224 | IRS2    | IRS2     | -        |
| hsa-miR-224 | IRX2    | IRX2     | -        |
| hsa-miR-224 | ISM1    | ISM1     | -        |
| hsa-miR-224 | -       | ITM2B    | ITM2B    |
| hsa-miR-224 | ITSN1   | ITSN1    | -        |
| hsa-miR-224 | JHDM1D  | JHDM1D   | -        |
| hsa-miR-224 | KAL1    | KAL1     | -        |
| hsa-miR-224 | KBTBD8  | KBTBD8   | -        |
| hsa-miR-224 | -       | KCNMA1   | KCNMA1   |
| hsa-miR-224 | KCTD12  | KCTD12   | -        |
| hsa-miR-224 | KCTD2   | KCTD2    | -        |
| hsa-miR-224 | KCTD21  | KCTD21   | -        |



|             |          |          |          |
|-------------|----------|----------|----------|
| hsa-miR-224 | KDM2A    | KDM2A    | -        |
| hsa-miR-224 | KIAA0430 | KIAA0430 | -        |
| hsa-miR-224 | KIAA1239 | KIAA1239 | -        |
| hsa-miR-224 | KIAA1244 | KIAA1244 | -        |
| hsa-miR-224 | -        | KIAA1524 | KIAA1524 |
| hsa-miR-224 | KIF23    | KIF23    | -        |
| hsa-miR-224 | -        | KIF5C    | KIF5C    |
| hsa-miR-224 | -        | KIF6     | KIF6     |
| hsa-miR-224 | -        | KLF8     | KLF8     |
| hsa-miR-224 | KLHL23   | -        | KLHL23   |
| hsa-miR-224 | -        | KLK10    | KLK10    |
| hsa-miR-224 | -        | KLRF1    | KLRF1    |
| hsa-miR-224 | -        | LAMP2    | LAMP2    |
| hsa-miR-224 | -        | LAPTM4A  | LAPTM4A  |
| hsa-miR-224 | LBR      | LBR      | -        |
| hsa-miR-224 | LCOR     | LCOR     | -        |
| hsa-miR-224 | LMBR1    | LMBR1    | -        |
| hsa-miR-224 | -        | LMO2     | LMO2     |
| hsa-miR-224 | LPAR5    | LPAR5    | -        |
| hsa-miR-224 | LPP      | LPP      | -        |
| hsa-miR-224 | -        | LRRC33   | LRRC33   |
| hsa-miR-224 | LRRC58   | LRRC58   | -        |
| hsa-miR-224 | LRRTM3   | LRRTM3   | -        |
| hsa-miR-224 | -        | LSM6     | LSM6     |
| hsa-miR-224 | LYPLA1   | LYPLA1   | -        |
| hsa-miR-224 | -        | MAD2L1BP | MAD2L1BP |
| hsa-miR-224 | MAFF     | MAFF     | -        |
| hsa-miR-224 | MAFG     | MAFG     | -        |
| hsa-miR-224 | -        | MAGEA1   | MAGEA1   |
| hsa-miR-224 | -        | MAGEA11  | MAGEA11  |
| hsa-miR-224 | MAP1B    | MAP1B    | -        |
| hsa-miR-224 | -        | MAP3K7   | MAP3K7   |
| hsa-miR-224 | MAP4     | MAP4     | -        |
| hsa-miR-224 | MAPK14   | MAPK14   | -        |
| hsa-miR-224 | MARCH5   | MARCH5   | -        |
| hsa-miR-224 | -        | MARCH9   | MARCH9   |
| hsa-miR-224 | MARCKS   | MARCKS   | -        |
| hsa-miR-224 | -        | MASP1    | MASP1    |
| hsa-miR-224 | MBD2     | MBD2     | -        |
| hsa-miR-224 | MBNL1    | MBNL1    | -        |
| hsa-miR-224 | MBNL2    | MBNL2    | -        |
| hsa-miR-224 | MBNL3    | MBNL3    | -        |
| hsa-miR-224 | -        | MBOAT4   | MBOAT4   |
| hsa-miR-224 | -        | MCF2L    | MCF2L    |
| hsa-miR-224 | -        | MCTP2    | MCTP2    |
| hsa-miR-224 | -        | MDK      | MDK      |
| hsa-miR-224 | -        | MEGF11   | MEGF11   |
| hsa-miR-224 | -        | MF12     | MF12     |
| hsa-miR-224 | -        | MGAT4B   | MGAT4B   |
| hsa-miR-224 | -        | MGEA5    | MGEA5    |
| hsa-miR-224 | -        | MINPP1   | MINPP1   |

|             |        |         |         |
|-------------|--------|---------|---------|
| hsa-miR-224 | -      | MLKL    | MLKL    |
| hsa-miR-224 | -      | MLPH    | MLPH    |
| hsa-miR-224 | -      | MOCS2   | MOCS2   |
| hsa-miR-224 | -      | MPDU1   | MPDU1   |
| hsa-miR-224 | MPEG1  | MPEG1   | -       |
| hsa-miR-224 | -      | MRPL47  | MRPL47  |
| hsa-miR-224 | -      | MRVI1   | MRVI1   |
| hsa-miR-224 | -      | MXRA8   | MXRA8   |
| hsa-miR-224 | -      | MYH15   | MYH15   |
| hsa-miR-224 | MYLIP  | MYLIP   | -       |
| hsa-miR-224 | MYO5A  | MYO5A   | -       |
| hsa-miR-224 | -      | MYOM1   | MYOM1   |
| hsa-miR-224 | NAP1L1 | NAP1L1  | -       |
| hsa-miR-224 | NAPB   | NAPB    | -       |
| hsa-miR-224 | NAV2   | NAV2    | -       |
| hsa-miR-224 | -      | NCKAP1L | NCKAP1L |
| hsa-miR-224 | -      | NCOA6   | NCOA6   |
| hsa-miR-224 | -      | NCOR1   | NCOR1   |
| hsa-miR-224 | NCS1   | NCS1    | -       |
| hsa-miR-224 | -      | NDUFB2  | NDUFB2  |
| hsa-miR-224 | -      | NECAP1  | NECAP1  |
| hsa-miR-224 | -      | NECAP2  | NECAP2  |
| hsa-miR-224 | NEDD4L | NEDD4L  | -       |
| hsa-miR-224 | -      | NELL1   | NELL1   |
| hsa-miR-224 | NFIA   | NFIA    | -       |
| hsa-miR-224 | NFIB   | NFIB    | -       |
| hsa-miR-224 | -      | NIT1    | NIT1    |
| hsa-miR-224 | NKX3-1 | NKX3-1  | -       |
| hsa-miR-224 | -      | NOL3    | NOL3    |
| hsa-miR-224 | -      | NOLC1   | NOLC1   |
| hsa-miR-224 | NOTUM  | NOTUM   | -       |
| hsa-miR-224 | -      | NOX1    | NOX1    |
| hsa-miR-224 | -      | NPC2    | NPC2    |
| hsa-miR-224 | -      | NPFFR2  | NPFFR2  |
| hsa-miR-224 | -      | NPL     | NPL     |
| hsa-miR-224 | -      | NPPA    | NPPA    |
| hsa-miR-224 | NR4A1  | NR4A1   | -       |
| hsa-miR-224 | NR4A3  | NR4A3   | -       |
| hsa-miR-224 | -      | NRIP3   | NRIP3   |
| hsa-miR-224 | NRP2   | NRP2    | -       |
| hsa-miR-224 | -      | NRSN1   | NRSN1   |
| hsa-miR-224 | NUAK1  | NUAK1   | -       |
| hsa-miR-224 | -      | NUP133  | NUP133  |
| hsa-miR-224 | -      | OCIAD2  | OCIAD2  |
| hsa-miR-224 | OCLN   | OCLN    | -       |
| hsa-miR-224 | OPHN1  | OPHN1   | -       |
| hsa-miR-224 | -      | ORC4L   | ORC4L   |
| hsa-miR-224 | -      | ORMDL1  | ORMDL1  |
| hsa-miR-224 | OTUB2  | OTUB2   | -       |
| hsa-miR-224 | -      | PACRG   | PACRG   |
| hsa-miR-224 | -      | PANX1   | PANX1   |

|             |         |         |         |
|-------------|---------|---------|---------|
| hsa-miR-224 | PAPOLA  | PAPOLA  | -       |
| hsa-miR-224 | -       | PARS2   | PARS2   |
| hsa-miR-224 | -       | PBX3    | PBX3    |
| hsa-miR-224 | PCNX    | PCNX    | -       |
| hsa-miR-224 | PCSK9   | PCSK9   | -       |
| hsa-miR-224 | PCYT1B  | -       | PCYT1B  |
| hsa-miR-224 | PDCD7   | PDCD7   | -       |
| hsa-miR-224 | PDCL    | PDCL    | -       |
| hsa-miR-224 | -       | PDSS2   | PDSS2   |
| hsa-miR-224 | PDZD11  | PDZD11  | -       |
| hsa-miR-224 | -       | PEX11A  | PEX11A  |
| hsa-miR-224 | -       | PGAM4   | PGAM4   |
| hsa-miR-224 | -       | PGBD2   | PGBD2   |
| hsa-miR-224 | PHF6    | PHF6    | -       |
| hsa-miR-224 | PHLPP1  | PHLPP1  | -       |
| hsa-miR-224 | PHLPP2  | PHLPP2  | -       |
| hsa-miR-224 | -       | PHOX2B  | PHOX2B  |
| hsa-miR-224 | PIK3R3  | PIK3R3  | -       |
| hsa-miR-224 | PIP4K2B | PIP4K2B | -       |
| hsa-miR-224 | PJA2    | PJA2    | -       |
| hsa-miR-224 | PLAG1   | PLAG1   | -       |
| hsa-miR-224 | -       | POLR2K  | POLR2K  |
| hsa-miR-224 | -       | POPDC2  | POPDC2  |
| hsa-miR-224 | PPAP2B  | PPAP2B  | -       |
| hsa-miR-224 | PPP1R2  | PPP1R2  | -       |
| hsa-miR-224 | PPPDE1  | PPPDE1  | -       |
| hsa-miR-224 | PRDM4   | PRDM4   | -       |
| hsa-miR-224 | -       | PRDM5   | PRDM5   |
| hsa-miR-224 | PRKCQ   | PRKCQ   | -       |
| hsa-miR-224 | PRPF4B  | PRPF4B  | -       |
| hsa-miR-224 | PRPS2   | PRPS2   | -       |
| hsa-miR-224 | PSD2    | PSD2    | -       |
| hsa-miR-224 | -       | PSMD3   | PSMD3   |
| hsa-miR-224 | -       | PSPC1   | PSPC1   |
| hsa-miR-224 | -       | PTS     | PTS     |
| hsa-miR-224 | PUS10   | PUS10   | -       |
| hsa-miR-224 | -       | PWP2    | PWP2    |
| hsa-miR-224 | QTRTD1  | QTRTD1  | -       |
| hsa-miR-224 | -       | RABGGTB | RABGGTB |
| hsa-miR-224 | RAD23B  | RAD23B  | -       |
| hsa-miR-224 | -       | RAD51L1 | RAD51L1 |
| hsa-miR-224 | RALA    | RALA    | -       |
| hsa-miR-224 | RALGPS1 | RALGPS1 | -       |
| hsa-miR-224 | RANBP17 | RANBP17 | -       |
| hsa-miR-224 | -       | RASD1   | RASD1   |
| hsa-miR-224 | -       | RASEF   | RASEF   |
| hsa-miR-224 | RASSF8  | RASSF8  | -       |
| hsa-miR-224 | RBBP5   | RBBP5   | -       |
| hsa-miR-224 | RBM18   | RBM18   | -       |
| hsa-miR-224 | -       | RBM27   | RBM27   |
| hsa-miR-224 | RECQL5  | RECQL5  | -       |

|             |         |          |          |
|-------------|---------|----------|----------|
| hsa-miR-224 | REPS2   | REPS2    | -        |
| hsa-miR-224 | RERE    | RERE     | -        |
| hsa-miR-224 | -       | RFC2     | RFC2     |
| hsa-miR-224 | -       | RFTN1    | RFTN1    |
| hsa-miR-224 | -       | RIOK3    | RIOK3    |
| hsa-miR-224 | -       | RNASEH1  | RNASEH1  |
| hsa-miR-224 | RNF144B | RNF144B  | -        |
| hsa-miR-224 | -       | RNMT     | RNMT     |
| hsa-miR-224 | -       | ROCK1    | ROCK1    |
| hsa-miR-224 | -       | RP9      | RP9      |
| hsa-miR-224 | RPRD1A  | RPRD1A   | -        |
| hsa-miR-224 | RTCD1   | RTCD1    | -        |
| hsa-miR-224 | -       | RUFY1    | RUFY1    |
| hsa-miR-224 | RUFY3   | RUFY3    | -        |
| hsa-miR-224 | SAR1A   | SAR1A    | -        |
| hsa-miR-224 | -       | SCG3     | SCG3     |
| hsa-miR-224 | SDC4    | SDC4     | -        |
| hsa-miR-224 | SEC14L5 | SEC14L5  | -        |
| hsa-miR-224 | SEMA4D  | SEMA4D   | -        |
| hsa-miR-224 | -       | SENP2    | SENP2    |
| hsa-miR-224 | -       | SENP6    | SENP6    |
| hsa-miR-224 | -       | SERPINB7 | SERPINB7 |
| hsa-miR-224 | SETD7   | SETD7    | -        |
| hsa-miR-224 | -       | SF3A3    | SF3A3    |
| hsa-miR-224 | SGTA    | SGTA     | -        |
| hsa-miR-224 | -       | SIAH2    | SIAH2    |
| hsa-miR-224 | SIK3    | SIK3     | -        |
| hsa-miR-224 | -       | SIX2     | SIX2     |
| hsa-miR-224 | SLC12A2 | SLC12A2  | -        |
| hsa-miR-224 | SLC12A5 | SLC12A5  | -        |
| hsa-miR-224 | -       | SLC16A3  | SLC16A3  |
| hsa-miR-224 | -       | SLC16A7  | SLC16A7  |
| hsa-miR-224 | SLC17A5 | SLC17A5  | -        |
| hsa-miR-224 | -       | SLC25A16 | SLC25A16 |
| hsa-miR-224 | -       | SLC25A3  | SLC25A3  |
| hsa-miR-224 | -       | SLC25A4  | SLC25A4  |
| hsa-miR-224 | -       | SLC37A4  | SLC37A4  |
| hsa-miR-224 | -       | SLC46A3  | SLC46A3  |
| hsa-miR-224 | SLC4A4  | SLC4A4   | -        |
| hsa-miR-224 | -       | SLC5A9   | SLC5A9   |
| hsa-miR-224 | SLCO2B1 | SLCO2B1  | -        |
| hsa-miR-224 | -       | SLMO2    | SLMO2    |
| hsa-miR-224 | SMAD4   | SMAD4    | -        |
| hsa-miR-224 | SMAD5   | SMAD5    | -        |
| hsa-miR-224 | SMCHD1  | SMCHD1   | -        |
| hsa-miR-224 | -       | SNUPN    | SNUPN    |
| hsa-miR-224 | -       | SOD1     | SOD1     |
| hsa-miR-224 | SORD    | SORD     | -        |
| hsa-miR-224 | SP7     | SP7      | -        |
| hsa-miR-224 | -       | SPAG8    | SPAG8    |
| hsa-miR-224 | -       | SPEN     | SPEN     |

|             |          |           |           |
|-------------|----------|-----------|-----------|
| hsa-miR-224 | -        | SPINK2    | SPINK2    |
| hsa-miR-224 | -        | SPINK6    | SPINK6    |
| hsa-miR-224 | SPOPL    | SPOPL     | -         |
| hsa-miR-224 | SPPL3    | SPPL3     | -         |
| hsa-miR-224 | SPRYD3   | SPRYD3    | -         |
| hsa-miR-224 | -        | STMN1     | STMN1     |
| hsa-miR-224 | SUPT16H  | SUPT16H   | -         |
| hsa-miR-224 | -        | SYT15     | SYT15     |
| hsa-miR-224 | -        | T         | T         |
| hsa-miR-224 | -        | TACR1     | TACR1     |
| hsa-miR-224 | -        | TAF4B     | TAF4B     |
| hsa-miR-224 | -        | TANK      | TANK      |
| hsa-miR-224 | -        | TARSL2    | TARSL2    |
| hsa-miR-224 | TBL1X    | TBL1X     | -         |
| hsa-miR-224 | -        | TBX1      | TBX1      |
| hsa-miR-224 | TBX5     | TBX5      | -         |
| hsa-miR-224 | -        | TCERG1    | TCERG1    |
| hsa-miR-224 | -        | TFB1M     | TFB1M     |
| hsa-miR-224 | -        | TFPI2     | TFPI2     |
| hsa-miR-224 | -        | TIMM23    | TIMM23    |
| hsa-miR-224 | -        | TIPRL     | TIPRL     |
| hsa-miR-224 | TMC7     | TMC7      | -         |
| hsa-miR-224 | TMEM110  | TMEM110   | -         |
| hsa-miR-224 | -        | TMEM117   | TMEM117   |
| hsa-miR-224 | -        | TMEM128   | TMEM128   |
| hsa-miR-224 | TMEM132B | TMEM132B  | -         |
| hsa-miR-224 | TMEM135  | TMEM135   | -         |
| hsa-miR-224 | -        | TMEM164   | TMEM164   |
| hsa-miR-224 | -        | TMEM51    | TMEM51    |
| hsa-miR-224 | TMF1     | TMF1      | -         |
| hsa-miR-224 | -        | TMPRSS11A | TMPRSS11A |
| hsa-miR-224 | -        | TMPRSS13  | TMPRSS13  |
| hsa-miR-224 | TMX1     | TMX1      | -         |
| hsa-miR-224 | TNRC6A   | TNRC6A    | -         |
| hsa-miR-224 | -        | TOX3      | TOX3      |
| hsa-miR-224 | -        | TPD52     | TPD52     |
| hsa-miR-224 | -        | TPRX1     | TPRX1     |
| hsa-miR-224 | TRA2B    | TRA2B     | -         |
| hsa-miR-224 | TRAPPC10 | TRAPPC10  | -         |
| hsa-miR-224 | -        | TRIM10    | TRIM10    |
| hsa-miR-224 | TRIM40   | TRIM40    | -         |
| hsa-miR-224 | -        | TRIP10    | TRIP10    |
| hsa-miR-224 | TSN      | TSN       | -         |
| hsa-miR-224 | TSPYL5   | -         | TSPYL5    |
| hsa-miR-224 | TTC3     | TTC3      | -         |
| hsa-miR-224 | -        | TXNDC6    | TXNDC6    |
| hsa-miR-224 | UBE2G1   | UBE2G1    | -         |
| hsa-miR-224 | -        | UBL4B     | UBL4B     |
| hsa-miR-224 | UBQLN1   | UBQLN1    | -         |
| hsa-miR-224 | UBQLN2   | UBQLN2    | -         |
| hsa-miR-224 | -        | UBTD2     | UBTD2     |

|              |         |            |            |
|--------------|---------|------------|------------|
| hsa-miR-224  | -       | UGT3A2     | UGT3A2     |
| hsa-miR-224  | UNC119B | UNC119B    | -          |
| hsa-miR-224  | UNC13A  | UNC13A     | -          |
| hsa-miR-224  | -       | UPB1       | UPB1       |
| hsa-miR-224  | USP3    | USP3       | -          |
| hsa-miR-224  | USP37   | USP37      | -          |
| hsa-miR-224  | -       | VEGFB      | VEGFB      |
| hsa-miR-224  | -       | VSX1       | VSX1       |
| hsa-miR-224  | -       | VWA2       | VWA2       |
| hsa-miR-224  | -       | WDR20      | WDR20      |
| hsa-miR-224  | -       | WDR4       | WDR4       |
| hsa-miR-224  | -       | WDR86      | WDR86      |
| hsa-miR-224  | -       | WFDC1      | WFDC1      |
| hsa-miR-224  | WTAP    | WTAP       | -          |
| hsa-miR-224  | WTIP    | WTIP       | -          |
| hsa-miR-224  | WWC3    | WWC3       | -          |
| hsa-miR-224  | -       | XKR3       | XKR3       |
| hsa-miR-224  | XPO5    | XPO5       | -          |
| hsa-miR-224  | YOD1    | YOD1       | -          |
| hsa-miR-224  | -       | ZBED3      | ZBED3      |
| hsa-miR-224  | ZBTB34  | ZBTB34     | -          |
| hsa-miR-224  | -       | ZC3HC1     | ZC3HC1     |
| hsa-miR-224  | ZFHX4   | ZFHX4      | -          |
| hsa-miR-224  | ZFP161  | ZFP161     | -          |
| hsa-miR-224  | -       | ZFP36L1    | ZFP36L1    |
| hsa-miR-224  | ZNF192  | ZNF192     | -          |
| hsa-miR-224  | ZNF2    | ZNF2       | -          |
| hsa-miR-224  | -       | ZNF317     | ZNF317     |
| hsa-miR-224  | -       | ZNF347     | ZNF347     |
| hsa-miR-224  | -       | ZNF407     | ZNF407     |
| hsa-miR-224  | ZNF423  | ZNF423     | -          |
| hsa-miR-224  | ZNF507  | ZNF507     | -          |
| hsa-miR-224  | -       | ZNF616     | ZNF616     |
| hsa-miR-224  | ZNF618  | -          | ZNF618     |
| hsa-miR-224  | -       | ZNF8       | ZNF8       |
| hsa-miR-23a* | -       | ADAM33     | ADAM33     |
| hsa-miR-23a* | -       | ADAMTS10   | ADAMTS10   |
| hsa-miR-23a* | -       | ALPL       | ALPL       |
| hsa-miR-23a* | -       | AP4S1      | AP4S1      |
| hsa-miR-23a* | -       | APPL2      | APPL2      |
| hsa-miR-23a* | -       | B4GALT2    | B4GALT2    |
| hsa-miR-23a* | -       | BAI2       | BAI2       |
| hsa-miR-23a* | -       | BCKDK      | BCKDK      |
| hsa-miR-23a* | -       | BEST1      | BEST1      |
| hsa-miR-23a* | -       | BRD3       | BRD3       |
| hsa-miR-23a* | -       | C12orf52   | C12orf52   |
| hsa-miR-23a* | -       | C14orf166B | C14orf166B |
| hsa-miR-23a* | -       | C1QTNF1    | C1QTNF1    |
| hsa-miR-23a* | -       | C1QTNF3    | C1QTNF3    |
| hsa-miR-23a* | -       | C20orf112  | C20orf112  |
| hsa-miR-23a* | -       | C20orf24   | C20orf24   |

|              |   |          |          |
|--------------|---|----------|----------|
| hsa-miR-23a* | - | C21orf58 | C21orf58 |
| hsa-miR-23a* | - | C3orf35  | C3orf35  |
| hsa-miR-23a* | - | C9orf11  | C9orf11  |
| hsa-miR-23a* | - | C9orf71  | C9orf71  |
| hsa-miR-23a* | - | CAMK2N2  | CAMK2N2  |
| hsa-miR-23a* | - | CAPN1    | CAPN1    |
| hsa-miR-23a* | - | CCL11    | CCL11    |
| hsa-miR-23a* | - | CD40     | CD40     |
| hsa-miR-23a* | - | CD58     | CD58     |
| hsa-miR-23a* | - | CEP250   | CEP250   |
| hsa-miR-23a* | - | CETP     | CETP     |
| hsa-miR-23a* | - | CHD3     | CHD3     |
| hsa-miR-23a* | - | CHD4     | CHD4     |
| hsa-miR-23a* | - | CKM      | CKM      |
| hsa-miR-23a* | - | CLDN9    | CLDN9    |
| hsa-miR-23a* | - | CNTN1    | CNTN1    |
| hsa-miR-23a* | - | CPNE5    | CPNE5    |
| hsa-miR-23a* | - | CPNE9    | CPNE9    |
| hsa-miR-23a* | - | CREB3L4  | CREB3L4  |
| hsa-miR-23a* | - | CRHR1    | CRHR1    |
| hsa-miR-23a* | - | CRYBB2   | CRYBB2   |
| hsa-miR-23a* | - | CRYGC    | CRYGC    |
| hsa-miR-23a* | - | CTDP1    | CTDP1    |
| hsa-miR-23a* | - | CTSA     | CTSA     |
| hsa-miR-23a* | - | DALRD3   | DALRD3   |
| hsa-miR-23a* | - | DGKE     | DGKE     |
| hsa-miR-23a* | - | DYNLRB1  | DYNLRB1  |
| hsa-miR-23a* | - | ENSA     | ENSA     |
| hsa-miR-23a* | - | EWSR1    | EWSR1    |
| hsa-miR-23a* | - | FAM27A   | FAM27A   |
| hsa-miR-23a* | - | FAM27C   | FAM27C   |
| hsa-miR-23a* | - | FBXW4    | FBXW4    |
| hsa-miR-23a* | - | FCRLB    | FCRLB    |
| hsa-miR-23a* | - | FRMPD2   | FRMPD2   |
| hsa-miR-23a* | - | GGA1     | GGA1     |
| hsa-miR-23a* | - | GIPC3    | GIPC3    |
| hsa-miR-23a* | - | GJA4     | GJA4     |
| hsa-miR-23a* | - | GNGT2    | GNGT2    |
| hsa-miR-23a* | - | GRAP     | GRAP     |
| hsa-miR-23a* | - | HCG9     | HCG9     |
| hsa-miR-23a* | - | HDGF     | HDGF     |
| hsa-miR-23a* | - | HRAS     | HRAS     |
| hsa-miR-23a* | - | HSD11B1L | HSD11B1L |
| hsa-miR-23a* | - | HTR4     | HTR4     |
| hsa-miR-23a* | - | ITLN1    | ITLN1    |
| hsa-miR-23a* | - | KCNN2    | KCNN2    |
| hsa-miR-23a* | - | KIRREL2  | KIRREL2  |
| hsa-miR-23a* | - | KLC4     | KLC4     |
| hsa-miR-23a* | - | KLK4     | KLK4     |
| hsa-miR-23a* | - | KRT80    | KRT80    |
| hsa-miR-23a* | - | LGMN     | LGMN     |

|              |   |         |         |
|--------------|---|---------|---------|
| hsa-miR-23a* | - | LHCGR   | LHCGR   |
| hsa-miR-23a* | - | LRRC41  | LRRC41  |
| hsa-miR-23a* | - | MBD6    | MBD6    |
| hsa-miR-23a* | - | ME2     | ME2     |
| hsa-miR-23a* | - | MPV17   | MPV17   |
| hsa-miR-23a* | - | MSH4    | MSH4    |
| hsa-miR-23a* | - | MXRA5   | MXRA5   |
| hsa-miR-23a* | - | MYO1D   | MYO1D   |
| hsa-miR-23a* | - | MYO3A   | MYO3A   |
| hsa-miR-23a* | - | N6AMT2  | N6AMT2  |
| hsa-miR-23a* | - | NDUFA10 | NDUFA10 |
| hsa-miR-23a* | - | OCM     | OCM     |
| hsa-miR-23a* | - | ODF1    | ODF1    |
| hsa-miR-23a* | - | ORC5L   | ORC5L   |
| hsa-miR-23a* | - | OSGEP   | OSGEP   |
| hsa-miR-23a* | - | P2RX2   | P2RX2   |
| hsa-miR-23a* | - | PCYT1A  | PCYT1A  |
| hsa-miR-23a* | - | PHC1    | PHC1    |
| hsa-miR-23a* | - | PLEKHA4 | PLEKHA4 |
| hsa-miR-23a* | - | PLOD1   | PLOD1   |
| hsa-miR-23a* | - | POLD4   | POLD4   |
| hsa-miR-23a* | - | POU2F2  | POU2F2  |
| hsa-miR-23a* | - | PPA2    | PPA2    |
| hsa-miR-23a* | - | PPYR1   | PPYR1   |
| hsa-miR-23a* | - | PRKCZ   | PRKCZ   |
| hsa-miR-23a* | - | PRRT1   | PRRT1   |
| hsa-miR-23a* | - | PYGM    | PYGM    |
| hsa-miR-23a* | - | RARRES2 | RARRES2 |
| hsa-miR-23a* | - | RBM4B   | RBM4B   |
| hsa-miR-23a* | - | RHOJ    | RHOJ    |
| hsa-miR-23a* | - | RNF166  | RNF166  |
| hsa-miR-23a* | - | RNGTT   | RNGTT   |
| hsa-miR-23a* | - | RPS6KA1 | RPS6KA1 |
| hsa-miR-23a* | - | SETD1A  | SETD1A  |
| hsa-miR-23a* | - | SFRS14  | SFRS14  |
| hsa-miR-23a* | - | SGCA    | SGCA    |
| hsa-miR-23a* | - | SIX6    | SIX6    |
| hsa-miR-23a* | - | SLAMF9  | SLAMF9  |
| hsa-miR-23a* | - | SMPD1   | SMPD1   |
| hsa-miR-23a* | - | SNX21   | SNX21   |
| hsa-miR-23a* | - | SPATA2L | SPATA2L |
| hsa-miR-23a* | - | STK19   | STK19   |
| hsa-miR-23a* | - | STX4    | STX4    |
| hsa-miR-23a* | - | SYCP2   | SYCP2   |
| hsa-miR-23a* | - | SYN1    | SYN1    |
| hsa-miR-23a* | - | SYN3    | SYN3    |
| hsa-miR-23a* | - | SYNGAP1 | SYNGAP1 |
| hsa-miR-23a* | - | TESK1   | TESK1   |
| hsa-miR-23a* | - | TH1L    | TH1L    |
| hsa-miR-23a* | - | TMEM95  | TMEM95  |
| hsa-miR-23a* | - | TNFSF10 | TNFSF10 |



|              |   |          |          |
|--------------|---|----------|----------|
| hsa-miR-23a* | - | TNFSF8   | TNFSF8   |
| hsa-miR-23a* | - | TOR2A    | TOR2A    |
| hsa-miR-23a* | - | TRIM48   | TRIM48   |
| hsa-miR-23a* | - | TRIM49   | TRIM49   |
| hsa-miR-23a* | - | TRPV1    | TRPV1    |
| hsa-miR-23a* | - | TSC22D4  | TSC22D4  |
| hsa-miR-23a* | - | TSPAN16  | TSPAN16  |
| hsa-miR-23a* | - | TSPYL5   | TSPYL5   |
| hsa-miR-23a* | - | TXK      | TXK      |
| hsa-miR-23a* | - | UROD     | UROD     |
| hsa-miR-23a* | - | WBP1     | WBP1     |
| hsa-miR-23a* | - | WDR33    | WDR33    |
| hsa-miR-23a* | - | ZFP36L2  | ZFP36L2  |
| hsa-miR-23a* | - | ZFYVE28  | ZFYVE28  |
| hsa-miR-23a* | - | ZMYM3    | ZMYM3    |
| hsa-miR-27a* | - | AFF3     | AFF3     |
| hsa-miR-27a* | - | AGBL1    | AGBL1    |
| hsa-miR-27a* | - | AKR1C2   | AKR1C2   |
| hsa-miR-27a* | - | ANGPT2   | ANGPT2   |
| hsa-miR-27a* | - | APEX1    | APEX1    |
| hsa-miR-27a* | - | ARG1     | ARG1     |
| hsa-miR-27a* | - | ARHGAP29 | ARHGAP29 |
| hsa-miR-27a* | - | ASH2L    | ASH2L    |
| hsa-miR-27a* | - | ATM      | ATM      |
| hsa-miR-27a* | - | BLK      | BLK      |
| hsa-miR-27a* | - | BPNT1    | BPNT1    |
| hsa-miR-27a* | - | BTF3     | BTF3     |
| hsa-miR-27a* | - | BUB3     | BUB3     |
| hsa-miR-27a* | - | C10orf95 | C10orf95 |
| hsa-miR-27a* | - | C19orf51 | C19orf51 |
| hsa-miR-27a* | - | C19orf61 | C19orf61 |
| hsa-miR-27a* | - | C1orf59  | C1orf59  |
| hsa-miR-27a* | - | C20orf3  | C20orf3  |
| hsa-miR-27a* | - | C9orf86  | C9orf86  |
| hsa-miR-27a* | - | CA10     | CA10     |
| hsa-miR-27a* | - | CABP4    | CABP4    |
| hsa-miR-27a* | - | CALM2    | CALM2    |
| hsa-miR-27a* | - | CCDC115  | CCDC115  |
| hsa-miR-27a* | - | CCDC45   | CCDC45   |
| hsa-miR-27a* | - | CCDC71   | CCDC71   |
| hsa-miR-27a* | - | CCDC81   | CCDC81   |
| hsa-miR-27a* | - | CD1C     | CD1C     |
| hsa-miR-27a* | - | CD1D     | CD1D     |
| hsa-miR-27a* | - | CD40LG   | CD40LG   |
| hsa-miR-27a* | - | CD99     | CD99     |
| hsa-miR-27a* | - | CDS2     | CDS2     |
| hsa-miR-27a* | - | CGREF1   | CGREF1   |
| hsa-miR-27a* | - | CLIP3    | CLIP3    |
| hsa-miR-27a* | - | COL4A3BP | COL4A3BP |
| hsa-miR-27a* | - | COL9A3   | COL9A3   |
| hsa-miR-27a* | - | COMMD9   | COMMD9   |

|              |   |           |           |
|--------------|---|-----------|-----------|
| hsa-miR-27a* | - | COPS7B    | COPS7B    |
| hsa-miR-27a* | - | CPA3      | CPA3      |
| hsa-miR-27a* | - | CPNE4     | CPNE4     |
| hsa-miR-27a* | - | CPSF2     | CPSF2     |
| hsa-miR-27a* | - | CSF3R     | CSF3R     |
| hsa-miR-27a* | - | CSTF2T    | CSTF2T    |
| hsa-miR-27a* | - | CTR9      | CTR9      |
| hsa-miR-27a* | - | CXorf56   | CXorf56   |
| hsa-miR-27a* | - | DCAKD     | DCAKD     |
| hsa-miR-27a* | - | DEPDC1    | DEPDC1    |
| hsa-miR-27a* | - | DLL3      | DLL3      |
| hsa-miR-27a* | - | DNM3      | DNM3      |
| hsa-miR-27a* | - | DPY19L2   | DPY19L2   |
| hsa-miR-27a* | - | DPY19L2P1 | DPY19L2P1 |
| hsa-miR-27a* | - | DRG2      | DRG2      |
| hsa-miR-27a* | - | DSG4      | DSG4      |
| hsa-miR-27a* | - | EFEMP2    | EFEMP2    |
| hsa-miR-27a* | - | EIF4A2    | EIF4A2    |
| hsa-miR-27a* | - | ENPP2     | ENPP2     |
| hsa-miR-27a* | - | ERP27     | ERP27     |
| hsa-miR-27a* | - | FAM5B     | FAM5B     |
| hsa-miR-27a* | - | FBLN1     | FBLN1     |
| hsa-miR-27a* | - | FHAD1     | FHAD1     |
| hsa-miR-27a* | - | FKBP2     | FKBP2     |
| hsa-miR-27a* | - | FOXN1     | FOXN1     |
| hsa-miR-27a* | - | FXYD3     | FXYD3     |
| hsa-miR-27a* | - | GAD2      | GAD2      |
| hsa-miR-27a* | - | GAL3ST3   | GAL3ST3   |
| hsa-miR-27a* | - | GALM      | GALM      |
| hsa-miR-27a* | - | GBA       | GBA       |
| hsa-miR-27a* | - | GBF1      | GBF1      |
| hsa-miR-27a* | - | GINS2     | GINS2     |
| hsa-miR-27a* | - | GPR125    | GPR125    |
| hsa-miR-27a* | - | GTF2F1    | GTF2F1    |
| hsa-miR-27a* | - | GTF3C5    | GTF3C5    |
| hsa-miR-27a* | - | GZMB      | GZMB      |
| hsa-miR-27a* | - | HECW2     | HECW2     |
| hsa-miR-27a* | - | HERC6     | HERC6     |
| hsa-miR-27a* | - | HOXB7     | HOXB7     |
| hsa-miR-27a* | - | HSD17B14  | HSD17B14  |
| hsa-miR-27a* | - | IL2       | IL2       |
| hsa-miR-27a* | - | INPP5B    | INPP5B    |
| hsa-miR-27a* | - | IPPK      | IPPK      |
| hsa-miR-27a* | - | IRX6      | IRX6      |
| hsa-miR-27a* | - | JAK3      | JAK3      |
| hsa-miR-27a* | - | KIAA1586  | KIAA1586  |
| hsa-miR-27a* | - | KRT32     | KRT32     |
| hsa-miR-27a* | - | LCE1C     | LCE1C     |
| hsa-miR-27a* | - | LGALS4    | LGALS4    |
| hsa-miR-27a* | - | MAP3K4    | MAP3K4    |
| hsa-miR-27a* | - | MBD1      | MBD1      |

|              |   |         |         |
|--------------|---|---------|---------|
| hsa-miR-27a* | - | MELK    | MELK    |
| hsa-miR-27a* | - | MRPL35  | MRPL35  |
| hsa-miR-27a* | - | MTMR14  | MTMR14  |
| hsa-miR-27a* | - | NALCN   | NALCN   |
| hsa-miR-27a* | - | NEFM    | NEFM    |
| hsa-miR-27a* | - | NR4A1   | NR4A1   |
| hsa-miR-27a* | - | NUDT5   | NUDT5   |
| hsa-miR-27a* | - | OCM     | OCM     |
| hsa-miR-27a* | - | ODZ2    | ODZ2    |
| hsa-miR-27a* | - | PCDHB4  | PCDHB4  |
| hsa-miR-27a* | - | PCNA    | PCNA    |
| hsa-miR-27a* | - | PDXDC1  | PDXDC1  |
| hsa-miR-27a* | - | PDZK1   | PDZK1   |
| hsa-miR-27a* | - | PEX16   | PEX16   |
| hsa-miR-27a* | - | PML     | PML     |
| hsa-miR-27a* | - | PNO1    | PNO1    |
| hsa-miR-27a* | - | POLR3E  | POLR3E  |
| hsa-miR-27a* | - | PPOX    | PPOX    |
| hsa-miR-27a* | - | PRCC    | PRCC    |
| hsa-miR-27a* | - | PRELID1 | PRELID1 |
| hsa-miR-27a* | - | PRF1    | PRF1    |
| hsa-miR-27a* | - | PRKCDBP | PRKCDBP |
| hsa-miR-27a* | - | PRRX2   | PRRX2   |
| hsa-miR-27a* | - | PTK7    | PTK7    |
| hsa-miR-27a* | - | PYGM    | PYGM    |
| hsa-miR-27a* | - | RASSF5  | RASSF5  |
| hsa-miR-27a* | - | RNGTT   | RNGTT   |
| hsa-miR-27a* | - | RPS6KB2 | RPS6KB2 |
| hsa-miR-27a* | - | RUSC2   | RUSC2   |
| hsa-miR-27a* | - | SAMD3   | SAMD3   |
| hsa-miR-27a* | - | SAP30L  | SAP30L  |
| hsa-miR-27a* | - | SARDH   | SARDH   |
| hsa-miR-27a* | - | SEMA4G  | SEMA4G  |
| hsa-miR-27a* | - | SGOL1   | SGOL1   |
| hsa-miR-27a* | - | SLC23A2 | SLC23A2 |
| hsa-miR-27a* | - | SLC8A3  | SLC8A3  |
| hsa-miR-27a* | - | SMARCD1 | SMARCD1 |
| hsa-miR-27a* | - | SNRPD3  | SNRPD3  |
| hsa-miR-27a* | - | SOD3    | SOD3    |
| hsa-miR-27a* | - | SP140   | SP140   |
| hsa-miR-27a* | - | SPI1    | SPI1    |
| hsa-miR-27a* | - | SPRR3   | SPRR3   |
| hsa-miR-27a* | - | STAT3   | STAT3   |
| hsa-miR-27a* | - | SYCE1   | SYCE1   |
| hsa-miR-27a* | - | TAPBPL  | TAPBPL  |
| hsa-miR-27a* | - | TBPL2   | TBPL2   |
| hsa-miR-27a* | - | TCP10   | TCP10   |
| hsa-miR-27a* | - | TFR2    | TFR2    |
| hsa-miR-27a* | - | TGM6    | TGM6    |
| hsa-miR-27a* | - | TLN1    | TLN1    |
| hsa-miR-27a* | - | TMCO6   | TMCO6   |

|              |   |          |          |
|--------------|---|----------|----------|
| hsa-miR-27a* | - | TMEM143  | TMEM143  |
| hsa-miR-27a* | - | TMEM144  | TMEM144  |
| hsa-miR-27a* | - | TMEM85   | TMEM85   |
| hsa-miR-27a* | - | TRH      | TRH      |
| hsa-miR-27a* | - | TSGA14   | TSGA14   |
| hsa-miR-27a* | - | TTLL1    | TTLL1    |
| hsa-miR-27a* | - | TYR      | TYR      |
| hsa-miR-27a* | - | USP21    | USP21    |
| hsa-miR-27a* | - | VAPB     | VAPB     |
| hsa-miR-27a* | - | ZNF394   | ZNF394   |
| hsa-miR-27a* | - | ZNF433   | ZNF433   |
| hsa-miR-27a* | - | ZNF485   | ZNF485   |
| hsa-miR-29a* | - | ABCA10   | ABCA10   |
| hsa-miR-29a* | - | ABI2     | ABI2     |
| hsa-miR-29a* | - | ACAA2    | ACAA2    |
| hsa-miR-29a* | - | ACAT2    | ACAT2    |
| hsa-miR-29a* | - | ACBD6    | ACBD6    |
| hsa-miR-29a* | - | ACPP     | ACPP     |
| hsa-miR-29a* | - | ACSL6    | ACSL6    |
| hsa-miR-29a* | - | ADAMTS6  | ADAMTS6  |
| hsa-miR-29a* | - | ADAMTS9  | ADAMTS9  |
| hsa-miR-29a* | - | ADD2     | ADD2     |
| hsa-miR-29a* | - | ADD3     | ADD3     |
| hsa-miR-29a* | - | ADRA1A   | ADRA1A   |
| hsa-miR-29a* | - | AEBP2    | AEBP2    |
| hsa-miR-29a* | - | AGBL2    | AGBL2    |
| hsa-miR-29a* | - | AGXT2L1  | AGXT2L1  |
| hsa-miR-29a* | - | AHI1     | AHI1     |
| hsa-miR-29a* | - | AK7      | AK7      |
| hsa-miR-29a* | - | ALDOB    | ALDOB    |
| hsa-miR-29a* | - | ALOX5    | ALOX5    |
| hsa-miR-29a* | - | ALS2CR11 | ALS2CR11 |
| hsa-miR-29a* | - | AMICA1   | AMICA1   |
| hsa-miR-29a* | - | ANKRD1   | ANKRD1   |
| hsa-miR-29a* | - | ANKRD44  | ANKRD44  |
| hsa-miR-29a* | - | ANKRD56  | ANKRD56  |
| hsa-miR-29a* | - | ANXA13   | ANXA13   |
| hsa-miR-29a* | - | AP3S1    | AP3S1    |
| hsa-miR-29a* | - | AP4B1    | AP4B1    |
| hsa-miR-29a* | - | APOB     | APOB     |
| hsa-miR-29a* | - | APOO     | APOO     |
| hsa-miR-29a* | - | ARID4B   | ARID4B   |
| hsa-miR-29a* | - | ARR3     | ARR3     |
| hsa-miR-29a* | - | ASCL2    | ASCL2    |
| hsa-miR-29a* | - | ATP13A4  | ATP13A4  |
| hsa-miR-29a* | - | ATP2A2   | ATP2A2   |
| hsa-miR-29a* | - | ATRX     | ATRX     |
| hsa-miR-29a* | - | B3GNT1   | B3GNT1   |
| hsa-miR-29a* | - | BBS2     | BBS2     |
| hsa-miR-29a* | - | BCCIP    | BCCIP    |
| hsa-miR-29a* | - | BET3L    | BET3L    |

|              |   |          |          |
|--------------|---|----------|----------|
| hsa-miR-29a* | - | BPTF     | BPTF     |
| hsa-miR-29a* | - | BRCA2    | BRCA2    |
| hsa-miR-29a* | - | BTBD8    | BTBD8    |
| hsa-miR-29a* | - | C10orf18 | C10orf18 |
| hsa-miR-29a* | - | C10orf79 | C10orf79 |
| hsa-miR-29a* | - | C11orf54 | C11orf54 |
| hsa-miR-29a* | - | C13orf15 | C13orf15 |
| hsa-miR-29a* | - | C13orf31 | C13orf31 |
| hsa-miR-29a* | - | C16orf68 | C16orf68 |
| hsa-miR-29a* | - | C18orf19 | C18orf19 |
| hsa-miR-29a* | - | C1orf103 | C1orf103 |
| hsa-miR-29a* | - | C2       | C2       |
| hsa-miR-29a* | - | C20orf24 | C20orf24 |
| hsa-miR-29a* | - | C2orf47  | C2orf47  |
| hsa-miR-29a* | - | C6orf192 | C6orf192 |
| hsa-miR-29a* | - | C9orf135 | C9orf135 |
| hsa-miR-29a* | - | C9orf3   | C9orf3   |
| hsa-miR-29a* | - | C9orf85  | C9orf85  |
| hsa-miR-29a* | - | C9orf86  | C9orf86  |
| hsa-miR-29a* | - | CA2      | CA2      |
| hsa-miR-29a* | - | CA3      | CA3      |
| hsa-miR-29a* | - | CACNA2D1 | CACNA2D1 |
| hsa-miR-29a* | - | CACNB2   | CACNB2   |
| hsa-miR-29a* | - | CASC1    | CASC1    |
| hsa-miR-29a* | - | CAST     | CAST     |
| hsa-miR-29a* | - | CBWD1    | CBWD1    |
| hsa-miR-29a* | - | CBWD3    | CBWD3    |
| hsa-miR-29a* | - | CBWD5    | CBWD5    |
| hsa-miR-29a* | - | CBWD6    | CBWD6    |
| hsa-miR-29a* | - | CCBL2    | CCBL2    |
| hsa-miR-29a* | - | CCDC23   | CCDC23   |
| hsa-miR-29a* | - | CCDC58   | CCDC58   |
| hsa-miR-29a* | - | CCDC69   | CCDC69   |
| hsa-miR-29a* | - | CCNI     | CCNI     |
| hsa-miR-29a* | - | CCT2     | CCT2     |
| hsa-miR-29a* | - | CD160    | CD160    |
| hsa-miR-29a* | - | CD1B     | CD1B     |
| hsa-miR-29a* | - | CD1D     | CD1D     |
| hsa-miR-29a* | - | CDS1     | CDS1     |
| hsa-miR-29a* | - | CEP76    | CEP76    |
| hsa-miR-29a* | - | CFH      | CFH      |
| hsa-miR-29a* | - | CFHR1    | CFHR1    |
| hsa-miR-29a* | - | CHAF1B   | CHAF1B   |
| hsa-miR-29a* | - | CHCHD2   | CHCHD2   |
| hsa-miR-29a* | - | CHD1L    | CHD1L    |
| hsa-miR-29a* | - | CHIA     | CHIA     |
| hsa-miR-29a* | - | CLGN     | CLGN     |
| hsa-miR-29a* | - | COL11A2  | COL11A2  |
| hsa-miR-29a* | - | COMMD6   | COMMD6   |
| hsa-miR-29a* | - | COPG     | COPG     |
| hsa-miR-29a* | - | CORO1A   | CORO1A   |

|              |   |           |           |
|--------------|---|-----------|-----------|
| hsa-miR-29a* | - | CREB3L2   | CREB3L2   |
| hsa-miR-29a* | - | CSE1L     | CSE1L     |
| hsa-miR-29a* | - | CSF2      | CSF2      |
| hsa-miR-29a* | - | CSTF2     | CSTF2     |
| hsa-miR-29a* | - | CTPS      | CTPS      |
| hsa-miR-29a* | - | CXorf22   | CXorf22   |
| hsa-miR-29a* | - | CXorf38   | CXorf38   |
| hsa-miR-29a* | - | CYP2E1    | CYP2E1    |
| hsa-miR-29a* | - | CYR61     | CYR61     |
| hsa-miR-29a* | - | DDAH1     | DDAH1     |
| hsa-miR-29a* | - | DENND1B   | DENND1B   |
| hsa-miR-29a* | - | DHRS4     | DHRS4     |
| hsa-miR-29a* | - | DHRS4L2   | DHRS4L2   |
| hsa-miR-29a* | - | DNMT3A    | DNMT3A    |
| hsa-miR-29a* | - | DONSON    | DONSON    |
| hsa-miR-29a* | - | DPY19L2P1 | DPY19L2P1 |
| hsa-miR-29a* | - | DPYD      | DPYD      |
| hsa-miR-29a* | - | DPYS      | DPYS      |
| hsa-miR-29a* | - | DUSP2     | DUSP2     |
| hsa-miR-29a* | - | EBP       | EBP       |
| hsa-miR-29a* | - | EDF1      | EDF1      |
| hsa-miR-29a* | - | EEF1A1    | EEF1A1    |
| hsa-miR-29a* | - | EFHC1     | EFHC1     |
| hsa-miR-29a* | - | EGF       | EGF       |
| hsa-miR-29a* | - | EIF2A     | EIF2A     |
| hsa-miR-29a* | - | EIF5B     | EIF5B     |
| hsa-miR-29a* | - | ELOVL5    | ELOVL5    |
| hsa-miR-29a* | - | EMB       | EMB       |
| hsa-miR-29a* | - | EMR1      | EMR1      |
| hsa-miR-29a* | - | ENG       | ENG       |
| hsa-miR-29a* | - | ENPP3     | ENPP3     |
| hsa-miR-29a* | - | ENTPD4    | ENTPD4    |
| hsa-miR-29a* | - | ENTPD5    | ENTPD5    |
| hsa-miR-29a* | - | EPHX2     | EPHX2     |
| hsa-miR-29a* | - | EXOSC7    | EXOSC7    |
| hsa-miR-29a* | - | FAM133B   | FAM133B   |
| hsa-miR-29a* | - | FAM45A    | FAM45A    |
| hsa-miR-29a* | - | FAM49B    | FAM49B    |
| hsa-miR-29a* | - | FAM65A    | FAM65A    |
| hsa-miR-29a* | - | FAM86B1   | FAM86B1   |
| hsa-miR-29a* | - | FAP       | FAP       |
| hsa-miR-29a* | - | FCGR2B    | FCGR2B    |
| hsa-miR-29a* | - | FCRL2     | FCRL2     |
| hsa-miR-29a* | - | FCRL3     | FCRL3     |
| hsa-miR-29a* | - | FGD4      | FGD4      |
| hsa-miR-29a* | - | FLOT1     | FLOT1     |
| hsa-miR-29a* | - | FLT3LG    | FLT3LG    |
| hsa-miR-29a* | - | FMO6P     | FMO6P     |
| hsa-miR-29a* | - | FOXP2     | FOXP2     |
| hsa-miR-29a* | - | GABRA6    | GABRA6    |
| hsa-miR-29a* | - | GANAB     | GANAB     |

|              |   |           |           |
|--------------|---|-----------|-----------|
| hsa-miR-29a* | - | GARNL3    | GARNL3    |
| hsa-miR-29a* | - | GATM      | GATM      |
| hsa-miR-29a* | - | GDI2      | GDI2      |
| hsa-miR-29a* | - | GDPD1     | GDPD1     |
| hsa-miR-29a* | - | GGT6      | GGT6      |
| hsa-miR-29a* | - | GINS4     | GINS4     |
| hsa-miR-29a* | - | GLUD2     | GLUD2     |
| hsa-miR-29a* | - | GLYAT     | GLYAT     |
| hsa-miR-29a* | - | GMCL1L    | GMCL1L    |
| hsa-miR-29a* | - | GNA15     | GNA15     |
| hsa-miR-29a* | - | GPR172B   | GPR172B   |
| hsa-miR-29a* | - | GRHL1     | GRHL1     |
| hsa-miR-29a* | - | GRIA3     | GRIA3     |
| hsa-miR-29a* | - | GRM5      | GRM5      |
| hsa-miR-29a* | - | GSTT2     | GSTT2     |
| hsa-miR-29a* | - | HIBCH     | HIBCH     |
| hsa-miR-29a* | - | HMX2      | HMX2      |
| hsa-miR-29a* | - | HSF2BP    | HSF2BP    |
| hsa-miR-29a* | - | HSPD1     | HSPD1     |
| hsa-miR-29a* | - | HTR2C     | HTR2C     |
| hsa-miR-29a* | - | IAPP      | IAPP      |
| hsa-miR-29a* | - | ICT1      | ICT1      |
| hsa-miR-29a* | - | IGJ       | IGJ       |
| hsa-miR-29a* | - | IL22RA1   | IL22RA1   |
| hsa-miR-29a* | - | IL9       | IL9       |
| hsa-miR-29a* | - | IMMT      | IMMT      |
| hsa-miR-29a* | - | IQCH      | IQCH      |
| hsa-miR-29a* | - | IQGAP2    | IQGAP2    |
| hsa-miR-29a* | - | KCNMA1    | KCNMA1    |
| hsa-miR-29a* | - | KHDRBS3   | KHDRBS3   |
| hsa-miR-29a* | - | KIAA0196  | KIAA0196  |
| hsa-miR-29a* | - | KIAA1529  | KIAA1529  |
| hsa-miR-29a* | - | KIF20A    | KIF20A    |
| hsa-miR-29a* | - | KLHL28    | KLHL28    |
| hsa-miR-29a* | - | KLK11     | KLK11     |
| hsa-miR-29a* | - | KLK3      | KLK3      |
| hsa-miR-29a* | - | KRCC1     | KRCC1     |
| hsa-miR-29a* | - | KRT20     | KRT20     |
| hsa-miR-29a* | - | LOC286238 | LOC286238 |
| hsa-miR-29a* | - | LOC645332 | LOC645332 |
| hsa-miR-29a* | - | LOC728660 | LOC728660 |
| hsa-miR-29a* | - | LOX       | LOX       |
| hsa-miR-29a* | - | LOXL4     | LOXL4     |
| hsa-miR-29a* | - | LPHN3     | LPHN3     |
| hsa-miR-29a* | - | LSS       | LSS       |
| hsa-miR-29a* | - | LTBP3     | LTBP3     |
| hsa-miR-29a* | - | LUM       | LUM       |
| hsa-miR-29a* | - | LYPD3     | LYPD3     |
| hsa-miR-29a* | - | MAGEA11   | MAGEA11   |
| hsa-miR-29a* | - | MAPK10    | MAPK10    |
| hsa-miR-29a* | - | MAPK9     | MAPK9     |

|              |   |          |          |
|--------------|---|----------|----------|
| hsa-miR-29a* | - | MARK1    | MARK1    |
| hsa-miR-29a* | - | MCCC2    | MCCC2    |
| hsa-miR-29a* | - | MEOX1    | MEOX1    |
| hsa-miR-29a* | - | MEOX2    | MEOX2    |
| hsa-miR-29a* | - | MGAT4C   | MGAT4C   |
| hsa-miR-29a* | - | MLF1     | MLF1     |
| hsa-miR-29a* | - | MPPED2   | MPPED2   |
| hsa-miR-29a* | - | MSH2     | MSH2     |
| hsa-miR-29a* | - | MTCP1    | MTCP1    |
| hsa-miR-29a* | - | MTHFD1   | MTHFD1   |
| hsa-miR-29a* | - | MTMR14   | MTMR14   |
| hsa-miR-29a* | - | MYLK     | MYLK     |
| hsa-miR-29a* | - | NDUFB9   | NDUFB9   |
| hsa-miR-29a* | - | NDUFS1   | NDUFS1   |
| hsa-miR-29a* | - | NETO1    | NETO1    |
| hsa-miR-29a* | - | NFATC2   | NFATC2   |
| hsa-miR-29a* | - | NIF3L1   | NIF3L1   |
| hsa-miR-29a* | - | NIN      | NIN      |
| hsa-miR-29a* | - | NNT      | NNT      |
| hsa-miR-29a* | - | NR2C1    | NR2C1    |
| hsa-miR-29a* | - | NTF3     | NTF3     |
| hsa-miR-29a* | - | NUDT13   | NUDT13   |
| hsa-miR-29a* | - | ODF3     | ODF3     |
| hsa-miR-29a* | - | OSGEP    | OSGEP    |
| hsa-miR-29a* | - | PARP9    | PARP9    |
| hsa-miR-29a* | - | PCCA     | PCCA     |
| hsa-miR-29a* | - | PCNP     | PCNP     |
| hsa-miR-29a* | - | PDDC1    | PDDC1    |
| hsa-miR-29a* | - | PDZD11   | PDZD11   |
| hsa-miR-29a* | - | PEA15    | PEA15    |
| hsa-miR-29a* | - | PEX3     | PEX3     |
| hsa-miR-29a* | - | PGBD1    | PGBD1    |
| hsa-miR-29a* | - | PKHD1L1  | PKHD1L1  |
| hsa-miR-29a* | - | PLD3     | PLD3     |
| hsa-miR-29a* | - | PLLP     | PLLP     |
| hsa-miR-29a* | - | PMP22    | PMP22    |
| hsa-miR-29a* | - | PNLDC1   | PNLDC1   |
| hsa-miR-29a* | - | PNLIPRP1 | PNLIPRP1 |
| hsa-miR-29a* | - | POLR2H   | POLR2H   |
| hsa-miR-29a* | - | POP4     | POP4     |
| hsa-miR-29a* | - | PPBP     | PPBP     |
| hsa-miR-29a* | - | PPIE     | PPIE     |
| hsa-miR-29a* | - | PRDM14   | PRDM14   |
| hsa-miR-29a* | - | PRM1     | PRM1     |
| hsa-miR-29a* | - | PRSS12   | PRSS12   |
| hsa-miR-29a* | - | PSG11    | PSG11    |
| hsa-miR-29a* | - | PSMA1    | PSMA1    |
| hsa-miR-29a* | - | PSMC6    | PSMC6    |
| hsa-miR-29a* | - | PSMD14   | PSMD14   |
| hsa-miR-29a* | - | PSMD5    | PSMD5    |
| hsa-miR-29a* | - | PSMD7    | PSMD7    |



|              |   |          |          |
|--------------|---|----------|----------|
| hsa-miR-29a* | - | PSPC1    | PSPC1    |
| hsa-miR-29a* | - | PTBP1    | PTBP1    |
| hsa-miR-29a* | - | PTPRH    | PTPRH    |
| hsa-miR-29a* | - | PTPRK    | PTPRK    |
| hsa-miR-29a* | - | QPCT     | QPCT     |
| hsa-miR-29a* | - | RAB3IP   | RAB3IP   |
| hsa-miR-29a* | - | RAD51L1  | RAD51L1  |
| hsa-miR-29a* | - | RASGRF2  | RASGRF2  |
| hsa-miR-29a* | - | RASSF5   | RASSF5   |
| hsa-miR-29a* | - | RB1      | RB1      |
| hsa-miR-29a* | - | RBBP6    | RBBP6    |
| hsa-miR-29a* | - | RBBP8    | RBBP8    |
| hsa-miR-29a* | - | RBMY1J   | RBMY1J   |
| hsa-miR-29a* | - | RDH16    | RDH16    |
| hsa-miR-29a* | - | RMND1    | RMND1    |
| hsa-miR-29a* | - | RNF213   | RNF213   |
| hsa-miR-29a* | - | RNF34    | RNF34    |
| hsa-miR-29a* | - | RQCD1    | RQCD1    |
| hsa-miR-29a* | - | RSAD1    | RSAD1    |
| hsa-miR-29a* | - | RSU1     | RSU1     |
| hsa-miR-29a* | - | SAP30L   | SAP30L   |
| hsa-miR-29a* | - | SASH1    | SASH1    |
| hsa-miR-29a* | - | SCFD1    | SCFD1    |
| hsa-miR-29a* | - | SCML4    | SCML4    |
| hsa-miR-29a* | - | SEC23B   | SEC23B   |
| hsa-miR-29a* | - | SEC23IP  | SEC23IP  |
| hsa-miR-29a* | - | SEC61A2  | SEC61A2  |
| hsa-miR-29a* | - | SEC61B   | SEC61B   |
| hsa-miR-29a* | - | SEMA4F   | SEMA4F   |
| hsa-miR-29a* | - | SERF2    | SERF2    |
| hsa-miR-29a* | - | SESN3    | SESN3    |
| hsa-miR-29a* | - | SFRS9    | SFRS9    |
| hsa-miR-29a* | - | SH3YL1   | SH3YL1   |
| hsa-miR-29a* | - | SIGLEC5  | SIGLEC5  |
| hsa-miR-29a* | - | SIX1     | SIX1     |
| hsa-miR-29a* | - | SIX3     | SIX3     |
| hsa-miR-29a* | - | SKIL     | SKIL     |
| hsa-miR-29a* | - | SLA      | SLA      |
| hsa-miR-29a* | - | SLC25A37 | SLC25A37 |
| hsa-miR-29a* | - | SLC26A3  | SLC26A3  |
| hsa-miR-29a* | - | SLC2A11  | SLC2A11  |
| hsa-miR-29a* | - | SLC2A8   | SLC2A8   |
| hsa-miR-29a* | - | SLC6A16  | SLC6A16  |
| hsa-miR-29a* | - | SLCO6A1  | SLCO6A1  |
| hsa-miR-29a* | - | SNTB2    | SNTB2    |
| hsa-miR-29a* | - | SNX2     | SNX2     |
| hsa-miR-29a* | - | SPACA1   | SPACA1   |
| hsa-miR-29a* | - | SPI1     | SPI1     |
| hsa-miR-29a* | - | SPINK2   | SPINK2   |
| hsa-miR-29a* | - | SPO11    | SPO11    |
| hsa-miR-29a* | - | SRFBP1   | SRFBP1   |

|                |   |         |         |
|----------------|---|---------|---------|
| hsa-miR-29a*   | - | SRP72   | SRP72   |
| hsa-miR-29a*   | - | SSX2IP  | SSX2IP  |
| hsa-miR-29a*   | - | SUMF1   | SUMF1   |
| hsa-miR-29a*   | - | TARBP2  | TARBP2  |
| hsa-miR-29a*   | - | TDRD9   | TDRD9   |
| hsa-miR-29a*   | - | TFPI    | TFPI    |
| hsa-miR-29a*   | - | THSD7A  | THSD7A  |
| hsa-miR-29a*   | - | TMEM100 | TMEM100 |
| hsa-miR-29a*   | - | TMEM14B | TMEM14B |
| hsa-miR-29a*   | - | TMEM14C | TMEM14C |
| hsa-miR-29a*   | - | TMEM59  | TMEM59  |
| hsa-miR-29a*   | - | TNNI1   | TNNI1   |
| hsa-miR-29a*   | - | TNPO3   | TNPO3   |
| hsa-miR-29a*   | - | TOMM70A | TOMM70A |
| hsa-miR-29a*   | - | TPO     | TPO     |
| hsa-miR-29a*   | - | TRDN    | TRDN    |
| hsa-miR-29a*   | - | TRIM48  | TRIM48  |
| hsa-miR-29a*   | - | TSPAN1  | TSPAN1  |
| hsa-miR-29a*   | - | TSPAN31 | TSPAN31 |
| hsa-miR-29a*   | - | TTBK2   | TTBK2   |
| hsa-miR-29a*   | - | TTC21B  | TTC21B  |
| hsa-miR-29a*   | - | TTC8    | TTC8    |
| hsa-miR-29a*   | - | TUBAL3  | TUBAL3  |
| hsa-miR-29a*   | - | TXNDC11 | TXNDC11 |
| hsa-miR-29a*   | - | TXNDC12 | TXNDC12 |
| hsa-miR-29a*   | - | UFM1    | UFM1    |
| hsa-miR-29a*   | - | UNKL    | UNKL    |
| hsa-miR-29a*   | - | UPP1    | UPP1    |
| hsa-miR-29a*   | - | USP15   | USP15   |
| hsa-miR-29a*   | - | USP16   | USP16   |
| hsa-miR-29a*   | - | VPS13D  | VPS13D  |
| hsa-miR-29a*   | - | WDFY2   | WDFY2   |
| hsa-miR-29a*   | - | WDR64   | WDR64   |
| hsa-miR-29a*   | - | WDR67   | WDR67   |
| hsa-miR-29a*   | - | WIBG    | WIBG    |
| hsa-miR-29a*   | - | WIPI1   | WIPI1   |
| hsa-miR-29a*   | - | YARS2   | YARS2   |
| hsa-miR-29a*   | - | ZCCHC11 | ZCCHC11 |
| hsa-miR-29a*   | - | ZCCHC8  | ZCCHC8  |
| hsa-miR-29a*   | - | ZNF222  | ZNF222  |
| hsa-miR-29a*   | - | ZNF322A | ZNF322A |
| hsa-miR-29a*   | - | ZNF322B | ZNF322B |
| hsa-miR-29a*   | - | ZNF643  | ZNF643  |
| hsa-miR-29a*   | - | ZNF667  | ZNF667  |
| hsa-miR-29a*   | - | ZNF713  | ZNF713  |
| hsa-miR-29a*   | - | ZPBP2   | ZPBP2   |
| hsa-miR-29b-2* | - | AATF    | AATF    |
| hsa-miR-29b-2* | - | ABCA4   | ABCA4   |
| hsa-miR-29b-2* | - | ABCB11  | ABCB11  |

|                |   |           |           |
|----------------|---|-----------|-----------|
| hsa-miR-29b-2* | - | ABCC1     | ABCC1     |
| hsa-miR-29b-2* | - | ACAT2     | ACAT2     |
| hsa-miR-29b-2* | - | ACSM3     | ACSM3     |
| hsa-miR-29b-2* | - | ADAMTS9   | ADAMTS9   |
| hsa-miR-29b-2* | - | AKAP8L    | AKAP8L    |
| hsa-miR-29b-2* | - | ALDH6A1   | ALDH6A1   |
| hsa-miR-29b-2* | - | ALG5      | ALG5      |
| hsa-miR-29b-2* | - | ALKBH3    | ALKBH3    |
| hsa-miR-29b-2* | - | ALS2CR11  | ALS2CR11  |
| hsa-miR-29b-2* | - | ANK1      | ANK1      |
| hsa-miR-29b-2* | - | ANKRD6    | ANKRD6    |
| hsa-miR-29b-2* | - | ANKZF1    | ANKZF1    |
| hsa-miR-29b-2* | - | ANUBL1    | ANUBL1    |
| hsa-miR-29b-2* | - | ARMCX5    | ARMCX5    |
| hsa-miR-29b-2* | - | ASB5      | ASB5      |
| hsa-miR-29b-2* | - | ASB7      | ASB7      |
| hsa-miR-29b-2* | - | ASH2L     | ASH2L     |
| hsa-miR-29b-2* | - | ATP2B2    | ATP2B2    |
| hsa-miR-29b-2* | - | ATP6V1G3  | ATP6V1G3  |
| hsa-miR-29b-2* | - | B4GALT7   | B4GALT7   |
| hsa-miR-29b-2* | - | BAG1      | BAG1      |
| hsa-miR-29b-2* | - | BPTF      | BPTF      |
| hsa-miR-29b-2* | - | C10orf119 | C10orf119 |
| hsa-miR-29b-2* | - | C12orf54  | C12orf54  |
| hsa-miR-29b-2* | - | C14orf148 | C14orf148 |
| hsa-miR-29b-2* | - | C14orf37  | C14orf37  |
| hsa-miR-29b-2* | - | C14orf48  | C14orf48  |
| hsa-miR-29b-2* | - | C14orf79  | C14orf79  |

|                |   |          |          |
|----------------|---|----------|----------|
| hsa-miR-29b-2* | - | C15orf29 | C15orf29 |
| hsa-miR-29b-2* | - | C15orf33 | C15orf33 |
| hsa-miR-29b-2* | - | C17orf50 | C17orf50 |
| hsa-miR-29b-2* | - | C18orf56 | C18orf56 |
| hsa-miR-29b-2* | - | C1orf97  | C1orf97  |
| hsa-miR-29b-2* | - | C20orf26 | C20orf26 |
| hsa-miR-29b-2* | - | C4orf6   | C4orf6   |
| hsa-miR-29b-2* | - | C8G      | C8G      |
| hsa-miR-29b-2* | - | C8orf47  | C8orf47  |
| hsa-miR-29b-2* | - | C9orf3   | C9orf3   |
| hsa-miR-29b-2* | - | CA6      | CA6      |
| hsa-miR-29b-2* | - | CACNA1E  | CACNA1E  |
| hsa-miR-29b-2* | - | CACNA2D3 | CACNA2D3 |
| hsa-miR-29b-2* | - | CCDC115  | CCDC115  |
| hsa-miR-29b-2* | - | CCDC40   | CCDC40   |
| hsa-miR-29b-2* | - | CCDC48   | CCDC48   |
| hsa-miR-29b-2* | - | CCDC56   | CCDC56   |
| hsa-miR-29b-2* | - | CCDC71   | CCDC71   |
| hsa-miR-29b-2* | - | CCL11    | CCL11    |
| hsa-miR-29b-2* | - | CD300LF  | CD300LF  |
| hsa-miR-29b-2* | - | CD79B    | CD79B    |
| hsa-miR-29b-2* | - | CDC123   | CDC123   |
| hsa-miR-29b-2* | - | CDC14A   | CDC14A   |
| hsa-miR-29b-2* | - | CDH22    | CDH22    |
| hsa-miR-29b-2* | - | CDKN3    | CDKN3    |
| hsa-miR-29b-2* | - | CECR2    | CECR2    |
| hsa-miR-29b-2* | - | CFLAR    | CFLAR    |
| hsa-miR-29b-2* | - | CHDH     | CHDH     |

|                |   |          |          |
|----------------|---|----------|----------|
| hsa-miR-29b-2* | - | CHEK1    | CHEK1    |
| hsa-miR-29b-2* | - | CMTM3    | CMTM3    |
| hsa-miR-29b-2* | - | CNGA3    | CNGA3    |
| hsa-miR-29b-2* | - | COMMD1   | COMMD1   |
| hsa-miR-29b-2* | - | COPG     | COPG     |
| hsa-miR-29b-2* | - | COQ9     | COQ9     |
| hsa-miR-29b-2* | - | CRIPT    | CRIPT    |
| hsa-miR-29b-2* | - | CSN3     | CSN3     |
| hsa-miR-29b-2* | - | CTPS     | CTPS     |
| hsa-miR-29b-2* | - | CXorf40B | CXorf40B |
| hsa-miR-29b-2* | - | CYP2J2   | CYP2J2   |
| hsa-miR-29b-2* | - | DDX27    | DDX27    |
| hsa-miR-29b-2* | - | DDX59    | DDX59    |
| hsa-miR-29b-2* | - | DFFB     | DFFB     |
| hsa-miR-29b-2* | - | DMGDH    | DMGDH    |
| hsa-miR-29b-2* | - | DMRT1    | DMRT1    |
| hsa-miR-29b-2* | - | DNAH9    | DNAH9    |
| hsa-miR-29b-2* | - | DNASE1L1 | DNASE1L1 |
| hsa-miR-29b-2* | - | DUSP27   | DUSP27   |
| hsa-miR-29b-2* | - | EBPL     | EBPL     |
| hsa-miR-29b-2* | - | EDA      | EDA      |
| hsa-miR-29b-2* | - | EIF2AK4  | EIF2AK4  |
| hsa-miR-29b-2* | - | EIF2C3   | EIF2C3   |
| hsa-miR-29b-2* | - | EIF5B    | EIF5B    |
| hsa-miR-29b-2* | - | EMG1     | EMG1     |
| hsa-miR-29b-2* | - | ENG      | ENG      |
| hsa-miR-29b-2* | - | ENOX1    | ENOX1    |
| hsa-miR-29b-2* | - | ENPP2    | ENPP2    |

|                |   |         |         |
|----------------|---|---------|---------|
| hsa-miR-29b-2* | - | ENTPD4  | ENTPD4  |
| hsa-miR-29b-2* | - | EPB41   | EPB41   |
| hsa-miR-29b-2* | - | ESAM    | ESAM    |
| hsa-miR-29b-2* | - | FAIM    | FAIM    |
| hsa-miR-29b-2* | - | FAM102A | FAM102A |
| hsa-miR-29b-2* | - | FAM105A | FAM105A |
| hsa-miR-29b-2* | - | FAM50B  | FAM50B  |
| hsa-miR-29b-2* | - | FAM53B  | FAM53B  |
| hsa-miR-29b-2* | - | FANCA   | FANCA   |
| hsa-miR-29b-2* | - | FANCD2  | FANCD2  |
| hsa-miR-29b-2* | - | FCER1A  | FCER1A  |
| hsa-miR-29b-2* | - | FEZF2   | FEZF2   |
| hsa-miR-29b-2* | - | FGF18   | FGF18   |
| hsa-miR-29b-2* | - | FMR1NB  | FMR1NB  |
| hsa-miR-29b-2* | - | FNDCC8  | FNDCC8  |
| hsa-miR-29b-2* | - | FRY     | FRY     |
| hsa-miR-29b-2* | - | FUCA2   | FUCA2   |
| hsa-miR-29b-2* | - | GDA     | GDA     |
| hsa-miR-29b-2* | - | GIPC3   | GIPC3   |
| hsa-miR-29b-2* | - | GNAS    | GNAS    |
| hsa-miR-29b-2* | - | GPR161  | GPR161  |
| hsa-miR-29b-2* | - | GPR172B | GPR172B |
| hsa-miR-29b-2* | - | GPR3    | GPR3    |
| hsa-miR-29b-2* | - | GRHL1   | GRHL1   |
| hsa-miR-29b-2* | - | GRIK2   | GRIK2   |
| hsa-miR-29b-2* | - | HEATR3  | HEATR3  |
| hsa-miR-29b-2* | - | HERC1   | HERC1   |
| hsa-miR-29b-2* | - | HIF3A   | HIF3A   |

|                |   |           |           |
|----------------|---|-----------|-----------|
| hsa-miR-29b-2* | - | HIST1H2AE | HIST1H2AE |
| hsa-miR-29b-2* | - | HKDC1     | HKDC1     |
| hsa-miR-29b-2* | - | HLA-E     | HLA-E     |
| hsa-miR-29b-2* | - | HMCN2     | HMCN2     |
| hsa-miR-29b-2* | - | HSPA9     | HSPA9     |
| hsa-miR-29b-2* | - | IGJ       | IGJ       |
| hsa-miR-29b-2* | - | IL15      | IL15      |
| hsa-miR-29b-2* | - | IL15RA    | IL15RA    |
| hsa-miR-29b-2* | - | IL22      | IL22      |
| hsa-miR-29b-2* | - | INPP5B    | INPP5B    |
| hsa-miR-29b-2* | - | INPP5E    | INPP5E    |
| hsa-miR-29b-2* | - | INSL5     | INSL5     |
| hsa-miR-29b-2* | - | KCNN3     | KCNN3     |
| hsa-miR-29b-2* | - | KIF12     | KIF12     |
| hsa-miR-29b-2* | - | KLB       | KLB       |
| hsa-miR-29b-2* | - | KRT10     | KRT10     |
| hsa-miR-29b-2* | - | KRT75     | KRT75     |
| hsa-miR-29b-2* | - | LCE1B     | LCE1B     |
| hsa-miR-29b-2* | - | LELP1     | LELP1     |
| hsa-miR-29b-2* | - | LENG8     | LENG8     |
| hsa-miR-29b-2* | - | LHX5      | LHX5      |
| hsa-miR-29b-2* | - | LIN52     | LIN52     |
| hsa-miR-29b-2* | - | LRAT      | LRAT      |
| hsa-miR-29b-2* | - | LRMP      | LRMP      |
| hsa-miR-29b-2* | - | LRRC18    | LRRC18    |
| hsa-miR-29b-2* | - | LRRC46    | LRRC46    |
| hsa-miR-29b-2* | - | LRRTM2    | LRRTM2    |
| hsa-miR-29b-2* | - | MAP3K1    | MAP3K1    |

|                |   |          |          |
|----------------|---|----------|----------|
| hsa-miR-29b-2* | - | MAP3K6   | MAP3K6   |
| hsa-miR-29b-2* | - | MARVELD2 | MARVELD2 |
| hsa-miR-29b-2* | - | MARVELD3 | MARVELD3 |
| hsa-miR-29b-2* | - | MAST2    | MAST2    |
| hsa-miR-29b-2* | - | MCF2     | MCF2     |
| hsa-miR-29b-2* | - | MDGA2    | MDGA2    |
| hsa-miR-29b-2* | - | MFSD8    | MFSD8    |
| hsa-miR-29b-2* | - | MGAT4A   | MGAT4A   |
| hsa-miR-29b-2* | - | MPPED2   | MPPED2   |
| hsa-miR-29b-2* | - | MRPL30   | MRPL30   |
| hsa-miR-29b-2* | - | MS4A8B   | MS4A8B   |
| hsa-miR-29b-2* | - | MTMR10   | MTMR10   |
| hsa-miR-29b-2* | - | MYO16    | MYO16    |
| hsa-miR-29b-2* | - | NCOA3    | NCOA3    |
| hsa-miR-29b-2* | - | NET1     | NET1     |
| hsa-miR-29b-2* | - | NEU3     | NEU3     |
| hsa-miR-29b-2* | - | NEXN     | NEXN     |
| hsa-miR-29b-2* | - | NFX1     | NFX1     |
| hsa-miR-29b-2* | - | NOMO3    | NOMO3    |
| hsa-miR-29b-2* | - | NR2F6    | NR2F6    |
| hsa-miR-29b-2* | - | NT5DC4   | NT5DC4   |
| hsa-miR-29b-2* | - | NUDT13   | NUDT13   |
| hsa-miR-29b-2* | - | OFD1     | OFD1     |
| hsa-miR-29b-2* | - | OVGP1    | OVGP1    |
| hsa-miR-29b-2* | - | PAFAH1B2 | PAFAH1B2 |
| hsa-miR-29b-2* | - | PAGE3    | PAGE3    |
| hsa-miR-29b-2* | - | PAPOLA   | PAPOLA   |
| hsa-miR-29b-2* | - | PCSK6    | PCSK6    |



|                |   |         |         |
|----------------|---|---------|---------|
| hsa-miR-29b-2* | - | PDXDC1  | PDXDC1  |
| hsa-miR-29b-2* | - | PHTF1   | PHTF1   |
| hsa-miR-29b-2* | - | PKD1L1  | PKD1L1  |
| hsa-miR-29b-2* | - | PKN2    | PKN2    |
| hsa-miR-29b-2* | - | PLCB4   | PLCB4   |
| hsa-miR-29b-2* | - | PLLP    | PLLP    |
| hsa-miR-29b-2* | - | POLR1E  | POLR1E  |
| hsa-miR-29b-2* | - | POU2F1  | POU2F1  |
| hsa-miR-29b-2* | - | POU2F2  | POU2F2  |
| hsa-miR-29b-2* | - | PPIE    | PPIE    |
| hsa-miR-29b-2* | - | PPIL5   | PPIL5   |
| hsa-miR-29b-2* | - | PRIMA1  | PRIMA1  |
| hsa-miR-29b-2* | - | PRMT2   | PRMT2   |
| hsa-miR-29b-2* | - | PRTFDC1 | PRTFDC1 |
| hsa-miR-29b-2* | - | PTPRH   | PTPRH   |
| hsa-miR-29b-2* | - | PXDNL   | PXDNL   |
| hsa-miR-29b-2* | - | QRICH1  | QRICH1  |
| hsa-miR-29b-2* | - | RAB27B  | RAB27B  |
| hsa-miR-29b-2* | - | RAD51C  | RAD51C  |
| hsa-miR-29b-2* | - | RAP1A   | RAP1A   |
| hsa-miR-29b-2* | - | REEP4   | REEP4   |
| hsa-miR-29b-2* | - | RETNLB  | RETNLB  |
| hsa-miR-29b-2* | - | RMND1   | RMND1   |
| hsa-miR-29b-2* | - | RPL23A  | RPL23A  |
| hsa-miR-29b-2* | - | RPN1    | RPN1    |
| hsa-miR-29b-2* | - | RPS27   | RPS27   |
| hsa-miR-29b-2* | - | RSAD1   | RSAD1   |
| hsa-miR-29b-2* | - | RTTN    | RTTN    |

|                |   |          |          |
|----------------|---|----------|----------|
| hsa-miR-29b-2* | - | SAMD7    | SAMD7    |
| hsa-miR-29b-2* | - | SAPS2    | SAPS2    |
| hsa-miR-29b-2* | - | SARS     | SARS     |
| hsa-miR-29b-2* | - | SATB1    | SATB1    |
| hsa-miR-29b-2* | - | SCG2     | SCG2     |
| hsa-miR-29b-2* | - | SCGB2A1  | SCGB2A1  |
| hsa-miR-29b-2* | - | SCGB2A2  | SCGB2A2  |
| hsa-miR-29b-2* | - | SEC61A2  | SEC61A2  |
| hsa-miR-29b-2* | - | SETDB2   | SETDB2   |
| hsa-miR-29b-2* | - | SH3GL3   | SH3GL3   |
| hsa-miR-29b-2* | - | SHARPIN  | SHARPIN  |
| hsa-miR-29b-2* | - | SIAH1    | SIAH1    |
| hsa-miR-29b-2* | - | SLC10A1  | SLC10A1  |
| hsa-miR-29b-2* | - | SLC13A3  | SLC13A3  |
| hsa-miR-29b-2* | - | SLC23A2  | SLC23A2  |
| hsa-miR-29b-2* | - | SLC25A11 | SLC25A11 |
| hsa-miR-29b-2* | - | SLC2A11  | SLC2A11  |
| hsa-miR-29b-2* | - | SLC39A4  | SLC39A4  |
| hsa-miR-29b-2* | - | SLC4A11  | SLC4A11  |
| hsa-miR-29b-2* | - | SNX2     | SNX2     |
| hsa-miR-29b-2* | - | SNX30    | SNX30    |
| hsa-miR-29b-2* | - | SORL1    | SORL1    |
| hsa-miR-29b-2* | - | SPAG11B  | SPAG11B  |
| hsa-miR-29b-2* | - | SPANXN2  | SPANXN2  |
| hsa-miR-29b-2* | - | SPANXN3  | SPANXN3  |
| hsa-miR-29b-2* | - | SPANXN5  | SPANXN5  |
| hsa-miR-29b-2* | - | SPIN3    | SPIN3    |
| hsa-miR-29b-2* | - | SRPRB    | SRPRB    |

|                |   |          |          |
|----------------|---|----------|----------|
| hsa-miR-29b-2* | - | SSRP1    | SSRP1    |
| hsa-miR-29b-2* | - | SSTR2    | SSTR2    |
| hsa-miR-29b-2* | - | ST7L     | ST7L     |
| hsa-miR-29b-2* | - | STARD8   | STARD8   |
| hsa-miR-29b-2* | - | STAT4    | STAT4    |
| hsa-miR-29b-2* | - | STXBP5L  | STXBP5L  |
| hsa-miR-29b-2* | - | SUSD3    | SUSD3    |
| hsa-miR-29b-2* | - | SV2A     | SV2A     |
| hsa-miR-29b-2* | - | SYN2     | SYN2     |
| hsa-miR-29b-2* | - | TAF13    | TAF13    |
| hsa-miR-29b-2* | - | TARDBP   | TARDBP   |
| hsa-miR-29b-2* | - | TBC1D8   | TBC1D8   |
| hsa-miR-29b-2* | - | TESK2    | TESK2    |
| hsa-miR-29b-2* | - | TFAM     | TFAM     |
| hsa-miR-29b-2* | - | TFAP2A   | TFAP2A   |
| hsa-miR-29b-2* | - | TFF2     | TFF2     |
| hsa-miR-29b-2* | - | THBS2    | THBS2    |
| hsa-miR-29b-2* | - | TLR6     | TLR6     |
| hsa-miR-29b-2* | - | TM7SF2   | TM7SF2   |
| hsa-miR-29b-2* | - | TMEM128  | TMEM128  |
| hsa-miR-29b-2* | - | TMEM132A | TMEM132A |
| hsa-miR-29b-2* | - | TMEM136  | TMEM136  |
| hsa-miR-29b-2* | - | TRIM41   | TRIM41   |
| hsa-miR-29b-2* | - | TRPT1    | TRPT1    |
| hsa-miR-29b-2* | - | TYK2     | TYK2     |
| hsa-miR-29b-2* | - | UBAP2L   | UBAP2L   |
| hsa-miR-29b-2* | - | UCHL5    | UCHL5    |
| hsa-miR-29b-2* | - | UCP3     | UCP3     |

|                |   |          |          |
|----------------|---|----------|----------|
| hsa-miR-29b-2* | - | UMODL1   | UMODL1   |
| hsa-miR-29b-2* | - | USH1C    | USH1C    |
| hsa-miR-29b-2* | - | VPS45    | VPS45    |
| hsa-miR-29b-2* | - | WDR64    | WDR64    |
| hsa-miR-29b-2* | - | WFDC12   | WFDC12   |
| hsa-miR-29b-2* | - | WHSC1L1  | WHSC1L1  |
| hsa-miR-29b-2* | - | WWC1     | WWC1     |
| hsa-miR-29b-2* | - | XRN2     | XRN2     |
| hsa-miR-29b-2* | - | YTHDF1   | YTHDF1   |
| hsa-miR-29b-2* | - | YWHAE    | YWHAE    |
| hsa-miR-29b-2* | - | ZHX3     | ZHX3     |
| hsa-miR-29b-2* | - | ZMYND15  | ZMYND15  |
| hsa-miR-29b-2* | - | ZNF12    | ZNF12    |
| hsa-miR-29b-2* | - | ZNF169   | ZNF169   |
| hsa-miR-29b-2* | - | ZNF266   | ZNF266   |
| hsa-miR-29b-2* | - | ZNF321   | ZNF321   |
| hsa-miR-29b-2* | - | ZNF394   | ZNF394   |
| hsa-miR-29b-2* | - | ZNF462   | ZNF462   |
| hsa-miR-29b-2* | - | ZNF568   | ZNF568   |
| hsa-miR-29b-2* | - | ZNF574   | ZNF574   |
| hsa-miR-29b-2* | - | ZNF611   | ZNF611   |
| hsa-miR-29b-2* | - | ZNF808   | ZNF808   |
| hsa-miR-29b-2* | - | ZNF83    | ZNF83    |
| hsa-miR-29c*   | - | AARS     | AARS     |
| hsa-miR-29c*   | - | ABCA10   | ABCA10   |
| hsa-miR-29c*   | - | ADAMTSL4 | ADAMTSL4 |
| hsa-miR-29c*   | - | ALPK1    | ALPK1    |
| hsa-miR-29c*   | - | ANKRD13C | ANKRD13C |
| hsa-miR-29c*   | - | ATP8B4   | ATP8B4   |
| hsa-miR-29c*   | - | ATXN7L1  | ATXN7L1  |
| hsa-miR-29c*   | - | BCL9     | BCL9     |
| hsa-miR-29c*   | - | C20orf85 | C20orf85 |

|              |      |          |          |
|--------------|------|----------|----------|
| hsa-miR-29c* | -    | C8orf42  | C8orf42  |
| hsa-miR-29c* | -    | CACNA1D  | CACNA1D  |
| hsa-miR-29c* | -    | CAPN3    | CAPN3    |
| hsa-miR-29c* | -    | CAPRN2   | CAPRN2   |
| hsa-miR-29c* | -    | CD8B     | CD8B     |
| hsa-miR-29c* | -    | CHRFAM7A | CHRFAM7A |
| hsa-miR-29c* | -    | CHRNA7   | CHRNA7   |
| hsa-miR-29c* | -    | CLASP1   | CLASP1   |
| hsa-miR-29c* | -    | CPNE2    | CPNE2    |
| hsa-miR-29c* | -    | CTPS     | CTPS     |
| hsa-miR-29c* | -    | EPHA7    | EPHA7    |
| hsa-miR-29c* | -    | FAHD1    | FAHD1    |
| hsa-miR-29c* | -    | GMEB2    | GMEB2    |
| hsa-miR-29c* | -    | GNPAT    | GNPAT    |
| hsa-miR-29c* | -    | GPR113   | GPR113   |
| hsa-miR-29c* | -    | HEBP2    | HEBP2    |
| hsa-miR-29c* | -    | HTATIP2  | HTATIP2  |
| hsa-miR-29c* | -    | ITCH     | ITCH     |
| hsa-miR-29c* | -    | KCNJ5    | KCNJ5    |
| hsa-miR-29c* | -    | MEA1     | MEA1     |
| hsa-miR-29c* | -    | MEIS1    | MEIS1    |
| hsa-miR-29c* | -    | MLF1IP   | MLF1IP   |
| hsa-miR-29c* | -    | MLL      | MLL      |
| hsa-miR-29c* | -    | MRPL3    | MRPL3    |
| hsa-miR-29c* | -    | MYCL1    | MYCL1    |
| hsa-miR-29c* | -    | MYCN     | MYCN     |
| hsa-miR-29c* | -    | NDUFA10  | NDUFA10  |
| hsa-miR-29c* | -    | NEK11    | NEK11    |
| hsa-miR-29c* | -    | PNLDC1   | PNLDC1   |
| hsa-miR-29c* | -    | PRELP    | PRELP    |
| hsa-miR-29c* | -    | PRR12    | PRR12    |
| hsa-miR-29c* | -    | RAP1A    | RAP1A    |
| hsa-miR-29c* | -    | RASGRF2  | RASGRF2  |
| hsa-miR-29c* | -    | RHBDD1   | RHBDD1   |
| hsa-miR-29c* | -    | SIGLEC11 | SIGLEC11 |
| hsa-miR-29c* | -    | SIGLEC12 | SIGLEC12 |
| hsa-miR-29c* | -    | SIGLEC7  | SIGLEC7  |
| hsa-miR-29c* | -    | SMC3     | SMC3     |
| hsa-miR-29c* | -    | SNRPC    | SNRPC    |
| hsa-miR-29c* | -    | SRR      | SRR      |
| hsa-miR-29c* | -    | SURF4    | SURF4    |
| hsa-miR-29c* | -    | TCEA3    | TCEA3    |
| hsa-miR-29c* | -    | TMEM98   | TMEM98   |
| hsa-miR-29c* | -    | TNC      | TNC      |
| hsa-miR-29c* | -    | YTHDF1   | YTHDF1   |
| hsa-miR-29c* | -    | ZBTB22   | ZBTB22   |
| hsa-miR-29c* | -    | ZNF232   | ZNF232   |
| hsa-miR-29c* | -    | ZNF696   | ZNF696   |
| hsa-miR-29c* | -    | ZSWIM3   | ZSWIM3   |
| hsa-miR-32   | -    | AADA3L3  | AADA3L3  |
| hsa-miR-32   | AATK | AATK     | -        |

|            |          |          |         |
|------------|----------|----------|---------|
| hsa-miR-32 | ABCG4    | ABCG4    | -       |
| hsa-miR-32 | ABHD13   | ABHD13   | -       |
| hsa-miR-32 | ABI3BP   | ABI3BP   | -       |
| hsa-miR-32 | -        | ACAA1    | ACAA1   |
| hsa-miR-32 | ACAN     | ACAN     | -       |
| hsa-miR-32 | ACOX1    | ACOX1    | -       |
| hsa-miR-32 | -        | ACTR3    | ACTR3   |
| hsa-miR-32 | ADAM10   | ADAM10   | -       |
| hsa-miR-32 | ADAM19   | ADAM19   | -       |
| hsa-miR-32 | ADAM23   | ADAM23   | -       |
| hsa-miR-32 | ADAMTS9  | ADAMTS9  | -       |
| hsa-miR-32 | ADAMTSL1 | ADAMTSL1 | -       |
| hsa-miR-32 | ADAMTSL3 | ADAMTSL3 | -       |
| hsa-miR-32 | -        | ADARB2   | ADARB2  |
| hsa-miR-32 | ADO      | ADO      | -       |
| hsa-miR-32 | AFF1     | AFF1     | -       |
| hsa-miR-32 | AFF3     | AFF3     | -       |
| hsa-miR-32 | AFF4     | AFF4     | -       |
| hsa-miR-32 | AGFG2    | AGFG2    | -       |
| hsa-miR-32 | AGGF1    | AGGF1    | -       |
| hsa-miR-32 | -        | AGR3     | AGR3    |
| hsa-miR-32 | AHCYL1   | AHCYL1   | -       |
| hsa-miR-32 | AIFM2    | AIFM2    | -       |
| hsa-miR-32 | -        | ANAPC13  | ANAPC13 |
| hsa-miR-32 | ANGPTL2  | ANGPTL2  | -       |
| hsa-miR-32 | ANKIB1   | ANKIB1   | -       |
| hsa-miR-32 | ANKRD13C | ANKRD13C | -       |
| hsa-miR-32 | ANO4     | ANO4     | -       |
| hsa-miR-32 | ANO8     | ANO8     | -       |
| hsa-miR-32 | -        | ANXA7    | ANXA7   |
| hsa-miR-32 | -        | AOAH     | AOAH    |
| hsa-miR-32 | AP1AR    | AP1AR    | -       |
| hsa-miR-32 | APPL1    | APPL1    | -       |
| hsa-miR-32 | ARF1     | ARF1     | -       |
| hsa-miR-32 | ARFGEF2  | ARFGEF2  | -       |
| hsa-miR-32 | ARHGAP29 | ARHGAP29 | -       |
| hsa-miR-32 | ARID5B   | ARID5B   | -       |
| hsa-miR-32 | -        | ARL1     | ARL1    |
| hsa-miR-32 | ARMC1    | ARMC1    | -       |
| hsa-miR-32 | -        | ARMC2    | ARMC2   |
| hsa-miR-32 | -        | ARMCX5   | ARMCX5  |
| hsa-miR-32 | ARRDC3   | ARRDC3   | -       |
| hsa-miR-32 | ARRDC4   | ARRDC4   | -       |
| hsa-miR-32 | -        | ASB5     | ASB5    |
| hsa-miR-32 | ASB7     | ASB7     | -       |
| hsa-miR-32 | ASPH     | ASPH     | -       |
| hsa-miR-32 | ASTN1    | ASTN1    | -       |
| hsa-miR-32 | -        | ATG3     | ATG3    |
| hsa-miR-32 | ATOX1    | ATOX1    | -       |
| hsa-miR-32 | ATP2A2   | ATP2A2   | -       |
| hsa-miR-32 | ATP2B4   | ATP2B4   | -       |

|            |           |           |           |
|------------|-----------|-----------|-----------|
| hsa-miR-32 | ATP7A     | ATP7A     | -         |
| hsa-miR-32 | ATP8B1    | ATP8B1    | -         |
| hsa-miR-32 | ATRX      | ATRX      | -         |
| hsa-miR-32 | ATXN1     | ATXN1     | -         |
| hsa-miR-32 | ATXN3     | ATXN3     | -         |
| hsa-miR-32 | ATXN7     | ATXN7     | -         |
| hsa-miR-32 | AXL       | AXL       | -         |
| hsa-miR-32 | AZIN1     | AZIN1     | -         |
| hsa-miR-32 | B3GALT2   | B3GALT2   | -         |
| hsa-miR-32 | BACH1     | BACH1     | -         |
| hsa-miR-32 | BAHCC1    | BAHCC1    | -         |
| hsa-miR-32 | BAI3      | BAI3      | -         |
| hsa-miR-32 | BAZ2A     | BAZ2A     | -         |
| hsa-miR-32 | BAZ2B     | BAZ2B     | -         |
| hsa-miR-32 | -         | BCAR3     | BCAR3     |
| hsa-miR-32 | BCL11A    | BCL11A    | -         |
| hsa-miR-32 | BCL11B    | BCL11B    | -         |
| hsa-miR-32 | BCL2L11   | BCL2L11   | -         |
| hsa-miR-32 | -         | BRI3      | BRI3      |
| hsa-miR-32 | BSDC1     | BSDC1     | -         |
| hsa-miR-32 | BSN       | BSN       | -         |
| hsa-miR-32 | -         | BTBD12    | BTBD12    |
| hsa-miR-32 | BTG2      | BTG2      | -         |
| hsa-miR-32 | C10orf118 | C10orf118 | -         |
| hsa-miR-32 | -         | C10orf137 | C10orf137 |
| hsa-miR-32 | C11orf41  | C11orf41  | -         |
| hsa-miR-32 | C11orf87  | C11orf87  | -         |
| hsa-miR-32 | -         | C12orf65  | C12orf65  |
| hsa-miR-32 | C17orf39  | C17orf39  | -         |
| hsa-miR-32 | C18orf25  | C18orf25  | -         |
| hsa-miR-32 | -         | C19orf12  | C19orf12  |
| hsa-miR-32 | -         | C1orf125  | C1orf125  |
| hsa-miR-32 | C20orf111 | C20orf111 | -         |
| hsa-miR-32 | C20orf194 | C20orf194 | -         |
| hsa-miR-32 | C21orf91  | C21orf91  | -         |
| hsa-miR-32 | C2CD4C    | C2CD4C    | -         |
| hsa-miR-32 | C2orf69   | C2orf69   | -         |
| hsa-miR-32 | -         | C4orf35   | C4orf35   |
| hsa-miR-32 | C5orf24   | C5orf24   | -         |
| hsa-miR-32 | C5orf30   | C5orf30   | -         |
| hsa-miR-32 | -         | C6orf167  | C6orf167  |
| hsa-miR-32 | CACNA1H   | CACNA1H   | -         |
| hsa-miR-32 | CACNA1I   | CACNA1I   | -         |
| hsa-miR-32 | CAMK2A    | CAMK2A    | -         |
| hsa-miR-32 | CASD1     | CASD1     | -         |
| hsa-miR-32 | CASK      | CASK      | -         |
| hsa-miR-32 | CBFA2T3   | CBFA2T3   | -         |
| hsa-miR-32 | CCDC113   | CCDC113   | -         |
| hsa-miR-32 | CCDC6     | CCDC6     | -         |
| hsa-miR-32 | -         | CCDC67    | CCDC67    |
| hsa-miR-32 | -         | CCDC89    | CCDC89    |

|            |         |         |         |
|------------|---------|---------|---------|
| hsa-miR-32 | CCNC    | CCNC    | -       |
| hsa-miR-32 | CCNE2   | CCNE2   | -       |
| hsa-miR-32 | CCNJL   | CCNJL   | -       |
| hsa-miR-32 | -       | CCR9    | CCR9    |
| hsa-miR-32 | CCT6A   | CCT6A   | -       |
| hsa-miR-32 | CD2AP   | CD2AP   | -       |
| hsa-miR-32 | CDC27   | CDC27   | -       |
| hsa-miR-32 | CDCA7L  | CDCA7L  | -       |
| hsa-miR-32 | -       | CDH10   | CDH10   |
| hsa-miR-32 | -       | CDH9    | CDH9    |
| hsa-miR-32 | CDK16   | CDK16   | -       |
| hsa-miR-32 | CDK5R1  | CDK5R1  | -       |
| hsa-miR-32 | -       | CDKL4   | CDKL4   |
| hsa-miR-32 | CEBPA   | CEBPA   | -       |
| hsa-miR-32 | CELF2   | CELF2   | -       |
| hsa-miR-32 | CEP350  | CEP350  | -       |
| hsa-miR-32 | -       | CES7    | CES7    |
| hsa-miR-32 | -       | CETN1   | CETN1   |
| hsa-miR-32 | CHCHD10 | CHCHD10 | -       |
| hsa-miR-32 | -       | CHCHD4  | CHCHD4  |
| hsa-miR-32 | CHD9    | CHD9    | -       |
| hsa-miR-32 | CHGA    | CHGA    | -       |
| hsa-miR-32 | CHMP7   | CHMP7   | -       |
| hsa-miR-32 | CHRM2   | CHRM2   | -       |
| hsa-miR-32 | -       | CKS2    | CKS2    |
| hsa-miR-32 | CLDN11  | CLDN11  | -       |
| hsa-miR-32 | CLIP4   | CLIP4   | -       |
| hsa-miR-32 | -       | CLK3    | CLK3    |
| hsa-miR-32 | -       | CNDP1   | CNDP1   |
| hsa-miR-32 | -       | CNGA1   | CNGA1   |
| hsa-miR-32 | CNIH    | CNIH    | -       |
| hsa-miR-32 | -       | CNKSR2  | CNKSR2  |
| hsa-miR-32 | CNNM4   | CNNM4   | -       |
| hsa-miR-32 | CNOT2   | CNOT2   | -       |
| hsa-miR-32 | -       | CNTNAP4 | CNTNAP4 |
| hsa-miR-32 | COL19A1 | COL19A1 | -       |
| hsa-miR-32 | -       | COL4A6  | COL4A6  |
| hsa-miR-32 | COL5A1  | COL5A1  | -       |
| hsa-miR-32 | CPEB3   | CPEB3   | -       |
| hsa-miR-32 | CPEB4   | CPEB4   | -       |
| hsa-miR-32 | CPNE8   | CPNE8   | -       |
| hsa-miR-32 | CREB1   | -       | CREB1   |
| hsa-miR-32 | -       | CRHBP   | CRHBP   |
| hsa-miR-32 | -       | CRLS1   | CRLS1   |
| hsa-miR-32 | CRTAM   | CRTAM   | -       |
| hsa-miR-32 | -       | CSDA    | CSDA    |
| hsa-miR-32 | CSMD1   | CSMD1   | -       |
| hsa-miR-32 | CSMD3   | CSMD3   | -       |
| hsa-miR-32 | CSRNP3  | CSRNP3  | -       |
| hsa-miR-32 | -       | CTCFL   | CTCFL   |
| hsa-miR-32 | CTTNBP2 | CTTNBP2 | -       |



|            |         |         |         |
|------------|---------|---------|---------|
| hsa-miR-32 | CUL3    | CUL3    | -       |
| hsa-miR-32 | CXADR   | CXADR   | -       |
| hsa-miR-32 | CXXC5   | CXXC5   | -       |
| hsa-miR-32 | -       | CXorf58 | CXorf58 |
| hsa-miR-32 | -       | CYB5A   | CYB5A   |
| hsa-miR-32 | D4S234E | D4S234E | -       |
| hsa-miR-32 | DAB2IP  | DAB2IP  | -       |
| hsa-miR-32 | DACT1   | DACT1   | -       |
| hsa-miR-32 | DAG1    | DAG1    | -       |
| hsa-miR-32 | -       | DBR1    | DBR1    |
| hsa-miR-32 | DCAF10  | DCAF10  | -       |
| hsa-miR-32 | DCAF6   | DCAF6   | -       |
| hsa-miR-32 | DCAF8   | DCAF8   | -       |
| hsa-miR-32 | DCC     | DCC     | -       |
| hsa-miR-32 | -       | DCP1B   | DCP1B   |
| hsa-miR-32 | DDHD2   | DDHD2   | -       |
| hsa-miR-32 | DDIT4   | DDIT4   | -       |
| hsa-miR-32 | DDX3X   | DDX3X   | -       |
| hsa-miR-32 | DDX3Y   | DDX3Y   | -       |
| hsa-miR-32 | DENND4B | DENND4B | -       |
| hsa-miR-32 | DLG5    | DLG5    | -       |
| hsa-miR-32 | DLGAP2  | DLGAP2  | -       |
| hsa-miR-32 | DMP1    | DMP1    | -       |
| hsa-miR-32 | -       | DMRT1   | DMRT1   |
| hsa-miR-32 | -       | DMRT2   | DMRT2   |
| hsa-miR-32 | DMXL1   | DMXL1   | -       |
| hsa-miR-32 | DNAJB12 | DNAJB12 | -       |
| hsa-miR-32 | DNAJC27 | DNAJC27 | -       |
| hsa-miR-32 | DNAJC30 | DNAJC30 | -       |
| hsa-miR-32 | -       | DOCK11  | DOCK11  |
| hsa-miR-32 | -       | DOCK4   | DOCK4   |
| hsa-miR-32 | DOCK5   | DOCK5   | -       |
| hsa-miR-32 | DOK5    | DOK5    | -       |
| hsa-miR-32 | DPYD    | DPYD    | -       |
| hsa-miR-32 | DSC2    | DSC2    | -       |
| hsa-miR-32 | DSTYK   | DSTYK   | -       |
| hsa-miR-32 | DTX2    | DTX2    | -       |
| hsa-miR-32 | DUSP10  | DUSP10  | -       |
| hsa-miR-32 | DYNLT3  | DYNLT3  | -       |
| hsa-miR-32 | DYRK2   | DYRK2   | -       |
| hsa-miR-32 | EDNRB   | EDNRB   | -       |
| hsa-miR-32 | EFR3A   | EFR3A   | -       |
| hsa-miR-32 | EFR3B   | EFR3B   | -       |
| hsa-miR-32 | -       | EGR1    | EGR1    |
| hsa-miR-32 | EGR2    | EGR2    | -       |
| hsa-miR-32 | -       | EID2B   | EID2B   |
| hsa-miR-32 | -       | EIF2AK4 | EIF2AK4 |
| hsa-miR-32 | EIF2C3  | EIF2C3  | -       |
| hsa-miR-32 | EIF4G2  | EIF4G2  | -       |
| hsa-miR-32 | ELFN2   | ELFN2   | -       |
| hsa-miR-32 | ELOVL4  | ELOVL4  | -       |

|            |          |          |         |
|------------|----------|----------|---------|
| hsa-miR-32 | ELOVL6   | ELOVL6   | -       |
| hsa-miR-32 | -        | EP300    | EP300   |
| hsa-miR-32 | EPB41L4A | EPB41L4A | -       |
| hsa-miR-32 | EPC2     | EPC2     | -       |
| hsa-miR-32 | EPS8     | EPS8     | -       |
| hsa-miR-32 | ERBB2IP  | ERBB2IP  | -       |
| hsa-miR-32 | ERC2     | ERC2     | -       |
| hsa-miR-32 | ERGIC2   | ERGIC2   | -       |
| hsa-miR-32 | -        | ESCO1    | ESCO1   |
| hsa-miR-32 | ESRP1    | ESRP1    | -       |
| hsa-miR-32 | EVI5     | EVI5     | -       |
| hsa-miR-32 | EXOC5    | EXOC5    | -       |
| hsa-miR-32 | -        | FAAH2    | FAAH2   |
| hsa-miR-32 | FAM117B  | FAM117B  | -       |
| hsa-miR-32 | FAM126B  | -        | FAM126B |
| hsa-miR-32 | FAM133B  | FAM133B  | -       |
| hsa-miR-32 | FAM135A  | FAM135A  | -       |
| hsa-miR-32 | FAM150B  | FAM150B  | -       |
| hsa-miR-32 | FAM160A2 | FAM160A2 | -       |
| hsa-miR-32 | FAM160B1 | FAM160B1 | -       |
| hsa-miR-32 | FAM164A  | FAM164A  | -       |
| hsa-miR-32 | FAM190B  | FAM190B  | -       |
| hsa-miR-32 | FAM196A  | FAM196A  | -       |
| hsa-miR-32 | FAM19A1  | FAM19A1  | -       |
| hsa-miR-32 | FAM20C   | FAM20C   | -       |
| hsa-miR-32 | -        | FAM24A   | FAM24A  |
| hsa-miR-32 | -        | FAM26D   | FAM26D  |
| hsa-miR-32 | -        | FAM49B   | FAM49B  |
| hsa-miR-32 | FAM70A   | FAM70A   | -       |
| hsa-miR-32 | FAM81A   | FAM81A   | -       |
| hsa-miR-32 | -        | FAM91A1  | FAM91A1 |
| hsa-miR-32 | FAR1     | FAR1     | -       |
| hsa-miR-32 | FARP1    | FARP1    | -       |
| hsa-miR-32 | FBN2     | FBN2     | -       |
| hsa-miR-32 | -        | FBN3     | FBN3    |
| hsa-miR-32 | FBXL17   | -        | FBXL17  |
| hsa-miR-32 | FBXO33   | FBXO33   | -       |
| hsa-miR-32 | FBXW7    | FBXW7    | -       |
| hsa-miR-32 | FCHO2    | FCHO2    | -       |
| hsa-miR-32 | -        | FCRL2    | FCRL2   |
| hsa-miR-32 | FGB      | FGB      | -       |
| hsa-miR-32 | -        | FGD5     | FGD5    |
| hsa-miR-32 | -        | FGFBP1   | FGFBP1  |
| hsa-miR-32 | -        | FGFBP2   | FGFBP2  |
| hsa-miR-32 | -        | FHL2     | FHL2    |
| hsa-miR-32 | -        | FKBP14   | FKBP14  |
| hsa-miR-32 | FKBP1A   | FKBP1A   | -       |
| hsa-miR-32 | FMN2     | FMN2     | -       |
| hsa-miR-32 | FMR1     | FMR1     | -       |
| hsa-miR-32 | FNBP4    | FNBP4    | -       |
| hsa-miR-32 | FNDC3B   | FNDC3B   | -       |

|            |         |         |         |
|------------|---------|---------|---------|
| hsa-miR-32 | FNIP1   | FNIP1   | -       |
| hsa-miR-32 | FNIP2   | FNIP2   | -       |
| hsa-miR-32 | FOSL2   | FOSL2   | -       |
| hsa-miR-32 | FOXG1   | FOXG1   | -       |
| hsa-miR-32 | FOXN2   | FOXN2   | -       |
| hsa-miR-32 | FRS2    | FRS2    | -       |
| hsa-miR-32 | G3BP2   | G3BP2   | -       |
| hsa-miR-32 | -       | GAA     | GAA     |
| hsa-miR-32 | -       | GABBR1  | GABBR1  |
| hsa-miR-32 | GALNT7  | GALNT7  | -       |
| hsa-miR-32 | -       | GALNTL5 | GALNTL5 |
| hsa-miR-32 | GATA2   | GATA2   | -       |
| hsa-miR-32 | GATA6   | GATA6   | -       |
| hsa-miR-32 | GATAD2B | GATAD2B | -       |
| hsa-miR-32 | GCFC1   | GCFC1   | -       |
| hsa-miR-32 | GCLM    | GCLM    | -       |
| hsa-miR-32 | GIT2    | GIT2    | -       |
| hsa-miR-32 | GLCE    | GLCE    | -       |
| hsa-miR-32 | GLRA1   | GLRA1   | -       |
| hsa-miR-32 | GLYR1   | GLYR1   | -       |
| hsa-miR-32 | GNPDA2  | GNPDA2  | -       |
| hsa-miR-32 | GNS     | GNS     | -       |
| hsa-miR-32 | GOLGA1  | GOLGA1  | -       |
| hsa-miR-32 | GOLGA3  | GOLGA3  | -       |
| hsa-miR-32 | GOLGA4  | GOLGA4  | -       |
| hsa-miR-32 | -       | GP6     | GP6     |
| hsa-miR-32 | -       | GPATCH1 | GPATCH1 |
| hsa-miR-32 | GPATCH8 | GPATCH8 | -       |
| hsa-miR-32 | -       | GPBP1   | GPBP1   |
| hsa-miR-32 | GPC6    | GPC6    | -       |
| hsa-miR-32 | GPM6A   | GPM6A   | -       |
| hsa-miR-32 | GPR158  | GPR158  | -       |
| hsa-miR-32 | -       | GPR172B | GPR172B |
| hsa-miR-32 | GPR180  | GPR180  | -       |
| hsa-miR-32 | GPR85   | GPR85   | -       |
| hsa-miR-32 | GRIA4   | GRIA4   | -       |
| hsa-miR-32 | -       | GRIN3B  | GRIN3B  |
| hsa-miR-32 | GRIP2   | -       | GRIP2   |
| hsa-miR-32 | HAND1   | HAND1   | -       |
| hsa-miR-32 | HAND2   | HAND2   | -       |
| hsa-miR-32 | HAS2    | HAS2    | -       |
| hsa-miR-32 | HAS3    | HAS3    | -       |
| hsa-miR-32 | -       | HBS1L   | HBS1L   |
| hsa-miR-32 | -       | HDAC9   | HDAC9   |
| hsa-miR-32 | HDLBP   | -       | HDLBP   |
| hsa-miR-32 | -       | HEATR1  | HEATR1  |
| hsa-miR-32 | HECW1   | HECW1   | -       |
| hsa-miR-32 | HEG1    | HEG1    | -       |
| hsa-miR-32 | HERC3   | HERC3   | -       |
| hsa-miR-32 | -       | HGSNAT  | HGSNAT  |
| hsa-miR-32 | -       | HHIP    | HHIP    |

|            |          |          |          |
|------------|----------|----------|----------|
| hsa-miR-32 | HIPK1    | HIPK1    | -        |
| hsa-miR-32 | HIPK3    | HIPK3    | -        |
| hsa-miR-32 | HMGA2    | HMGA2    | -        |
| hsa-miR-32 | HNF1B    | HNF1B    | -        |
| hsa-miR-32 | HNRNPU   | HNRNPU   | -        |
| hsa-miR-32 | HOXB8    | HOXB8    | -        |
| hsa-miR-32 | HOXC4    | HOXC4    | -        |
| hsa-miR-32 | HOXC8    | HOXC8    | -        |
| hsa-miR-32 | -        | HOXD1    | HOXD1    |
| hsa-miR-32 | -        | HS3ST1   | HS3ST1   |
| hsa-miR-32 | -        | IBSP     | IBSP     |
| hsa-miR-32 | ICK      | ICK      | -        |
| hsa-miR-32 | -        | IFNAR2   | IFNAR2   |
| hsa-miR-32 | IKZF1    | IKZF1    | -        |
| hsa-miR-32 | IKZF2    | IKZF2    | -        |
| hsa-miR-32 | IKZF4    | IKZF4    | -        |
| hsa-miR-32 | -        | IL12RB1  | IL12RB1  |
| hsa-miR-32 | -        | IL1F8    | IL1F8    |
| hsa-miR-32 | -        | IL1RL1   | IL1RL1   |
| hsa-miR-32 | -        | IL20RB   | IL20RB   |
| hsa-miR-32 | IL6ST    | -        | IL6ST    |
| hsa-miR-32 | IMPA2    | IMPA2    | -        |
| hsa-miR-32 | ING2     | ING2     | -        |
| hsa-miR-32 | INSIG1   | INSIG1   | -        |
| hsa-miR-32 | INSL5    | INSL5    | -        |
| hsa-miR-32 | IQGAP2   | IQGAP2   | -        |
| hsa-miR-32 | IRS2     | IRS2     | -        |
| hsa-miR-32 | ITGA6    | ITGA6    | -        |
| hsa-miR-32 | -        | ITGAE    | ITGAE    |
| hsa-miR-32 | ITGAV    | ITGAV    | -        |
| hsa-miR-32 | JAKMIP1  | JAKMIP1  | -        |
| hsa-miR-32 | JARID2   | JARID2   | -        |
| hsa-miR-32 | JMY      | JMY      | -        |
| hsa-miR-32 | JOSD1    | JOSD1    | -        |
| hsa-miR-32 | JPH2     | JPH2     | -        |
| hsa-miR-32 | KALRN    | KALRN    | -        |
| hsa-miR-32 | KAT2B    | KAT2B    | -        |
| hsa-miR-32 | KBTBD8   | KBTBD8   | -        |
| hsa-miR-32 | KCNA1    | KCNA1    | -        |
| hsa-miR-32 | KCNC4    | KCNC4    | -        |
| hsa-miR-32 | KCND2    | KCND2    | -        |
| hsa-miR-32 | -        | KCNMB2   | KCNMB2   |
| hsa-miR-32 | KIAA0240 | KIAA0240 | -        |
| hsa-miR-32 | KIAA1024 | KIAA1024 | -        |
| hsa-miR-32 | KIAA1211 | KIAA1211 | -        |
| hsa-miR-32 | KIAA1383 | KIAA1383 | -        |
| hsa-miR-32 | -        | KIAA1409 | KIAA1409 |
| hsa-miR-32 | KIAA1432 | KIAA1432 | -        |
| hsa-miR-32 | -        | KIAA1704 | KIAA1704 |
| hsa-miR-32 | KIF1B    | KIF1B    | -        |
| hsa-miR-32 | KIF3B    | KIF3B    | -        |

|            |         |           |           |
|------------|---------|-----------|-----------|
| hsa-miR-32 | KLF3    | KLF3      | -         |
| hsa-miR-32 | KLHDC10 | KLHDC10   | -         |
| hsa-miR-32 | KLHL14  | KLHL14    | -         |
| hsa-miR-32 | KLHL15  | KLHL15    | -         |
| hsa-miR-32 | KLHL18  | KLHL18    | -         |
| hsa-miR-32 | KLHL29  | KLHL29    | -         |
| hsa-miR-32 | KLHL31  | KLHL31    | -         |
| hsa-miR-32 | -       | KLK12     | KLK12     |
| hsa-miR-32 | -       | KLRF1     | KLRF1     |
| hsa-miR-32 | LATS2   | LATS2     | -         |
| hsa-miR-32 | LCOR    | LCOR      | -         |
| hsa-miR-32 | -       | LEO1      | LEO1      |
| hsa-miR-32 | LHFPL2  | LHFPL2    | -         |
| hsa-miR-32 | LIMCH1  | LIMCH1    | -         |
| hsa-miR-32 | LIN54   | LIN54     | -         |
| hsa-miR-32 | -       | LOC197350 | LOC197350 |
| hsa-miR-32 | LONRF3  | LONRF3    | -         |
| hsa-miR-32 | LPP     | LPP       | -         |
| hsa-miR-32 | LRCH1   | LRCH1     | -         |
| hsa-miR-32 | -       | LRRC1     | LRRC1     |
| hsa-miR-32 | -       | LRRC38    | LRRC38    |
| hsa-miR-32 | LRRC68  | LRRC68    | -         |
| hsa-miR-32 | LRRC8B  | LRRC8B    | -         |
| hsa-miR-32 | -       | LRRC9     | LRRC9     |
| hsa-miR-32 | LRRFIP2 | LRRFIP2   | -         |
| hsa-miR-32 | LUZP1   | LUZP1     | -         |
| hsa-miR-32 | LYST    | LYST      | -         |
| hsa-miR-32 | -       | MAGEC2    | MAGEC2    |
| hsa-miR-32 | MAP1B   | MAP1B     | -         |
| hsa-miR-32 | MAP2K4  | MAP2K4    | -         |
| hsa-miR-32 | MARCH4  | MARCH4    | -         |
| hsa-miR-32 | MARK1   | MARK1     | -         |
| hsa-miR-32 | MBD2    | MBD2      | -         |
| hsa-miR-32 | MBOAT2  | MBOAT2    | -         |
| hsa-miR-32 | MCL1    | MCL1      | -         |
| hsa-miR-32 | MED29   | MED29     | -         |
| hsa-miR-32 | MEF2D   | MEF2D     | -         |
| hsa-miR-32 | MFHAS1  | MFHAS1    | -         |
| hsa-miR-32 | -       | MIER1     | MIER1     |
| hsa-miR-32 | MIER3   | MIER3     | -         |
| hsa-miR-32 | MKL2    | MKL2      | -         |
| hsa-miR-32 | -       | MKRN2     | MKRN2     |
| hsa-miR-32 | MMD     | MMD       | -         |
| hsa-miR-32 | -       | MMP10     | MMP10     |
| hsa-miR-32 | MMP16   | MMP16     | -         |
| hsa-miR-32 | -       | MOAP1     | MOAP1     |
| hsa-miR-32 | -       | MPDZ      | MPDZ      |
| hsa-miR-32 | -       | MRFAP1L1  | MRFAP1L1  |
| hsa-miR-32 | -       | MRPL37    | MRPL37    |
| hsa-miR-32 | MS4A2   | MS4A2     | -         |
| hsa-miR-32 | -       | MS4A4A    | MS4A4A    |

|            |          |          |        |
|------------|----------|----------|--------|
| hsa-miR-32 | -        | MSR1     | MSR1   |
| hsa-miR-32 | MSRB3    | MSRB3    | -      |
| hsa-miR-32 | MTF1     | MTF1     | -      |
| hsa-miR-32 | MTHFD2   | MTHFD2   | -      |
| hsa-miR-32 | MTMR9    | MTMR9    | -      |
| hsa-miR-32 | MYH9     | MYH9     | -      |
| hsa-miR-32 | MYLIP    | MYLIP    | -      |
| hsa-miR-32 | -        | MYO18A   | MYO18A |
| hsa-miR-32 | MYO5A    | MYO5A    | -      |
| hsa-miR-32 | MYT1L    | MYT1L    | -      |
| hsa-miR-32 | NAA15    | NAA15    | -      |
| hsa-miR-32 | NAV3     | NAV3     | -      |
| hsa-miR-32 | NCKAP5   | NCKAP5   | -      |
| hsa-miR-32 | NCOA1    | NCOA1    | -      |
| hsa-miR-32 | -        | NCOA6    | NCOA6  |
| hsa-miR-32 | -        | NDUFS4   | NDUFS4 |
| hsa-miR-32 | NECAP1   | NECAP1   | -      |
| hsa-miR-32 | NELF     | NELF     | -      |
| hsa-miR-32 | NEO1     | NEO1     | -      |
| hsa-miR-32 | NF1      | NF1      | -      |
| hsa-miR-32 | NF2      | NF2      | -      |
| hsa-miR-32 | NFATC2IP | NFATC2IP | -      |
| hsa-miR-32 | NFIB     | NFIB     | -      |
| hsa-miR-32 | NFIX     | NFIX     | -      |
| hsa-miR-32 | NFYB     | NFYB     | -      |
| hsa-miR-32 | NFYC     | NFYC     | -      |
| hsa-miR-32 | NINL     | NINL     | -      |
| hsa-miR-32 | NIPBL    | NIPBL    | -      |
| hsa-miR-32 | -        | NKX2-5   | NKX2-5 |
| hsa-miR-32 | NLK      | NLK      | -      |
| hsa-miR-32 | -        | NNT      | NNT    |
| hsa-miR-32 | -        | NOB1     | NOB1   |
| hsa-miR-32 | -        | NOM1     | NOM1   |
| hsa-miR-32 | NOTCH1   | NOTCH1   | -      |
| hsa-miR-32 | NOVA1    | NOVA1    | -      |
| hsa-miR-32 | NPC1     | NPC1     | -      |
| hsa-miR-32 | NPHP3    | NPHP3    | -      |
| hsa-miR-32 | NPNT     | NPNT     | -      |
| hsa-miR-32 | NR4A3    | NR4A3    | -      |
| hsa-miR-32 | NRK      | NRK      | -      |
| hsa-miR-32 | NSF      | NSF      | -      |
| hsa-miR-32 | NUP43    | NUP43    | -      |
| hsa-miR-32 | -        | OIT3     | OIT3   |
| hsa-miR-32 | -        | OR9Q1    | OR9Q1  |
| hsa-miR-32 | OTUD3    | OTUD3    | -      |
| hsa-miR-32 | OTUD4    | OTUD4    | -      |
| hsa-miR-32 | OXSRI    | OXSRI    | -      |
| hsa-miR-32 | PAIP1    | PAIP1    | -      |
| hsa-miR-32 | PALLD    | PALLD    | -      |
| hsa-miR-32 | PAPD5    | -        | PAPD5  |
| hsa-miR-32 | PAPD7    | PAPD7    | -      |

|            |          |          |         |
|------------|----------|----------|---------|
| hsa-miR-32 | -        | PARK2    | PARK2   |
| hsa-miR-32 | -        | PAXIP1   | PAXIP1  |
| hsa-miR-32 | -        | PBLD     | PBLD    |
| hsa-miR-32 | PCDH10   | PCDH10   | -       |
| hsa-miR-32 | PCDH11Y  | PCDH11Y  | -       |
| hsa-miR-32 | PCDH7    | PCDH7    | -       |
| hsa-miR-32 | PCDH9    | PCDH9    | -       |
| hsa-miR-32 | -        | PCF11    | PCF11   |
| hsa-miR-32 | PCGF3    | PCGF3    | -       |
| hsa-miR-32 | PCMTD1   | PCMTD1   | -       |
| hsa-miR-32 | PCYT1B   | PCYT1B   | -       |
| hsa-miR-32 | -        | PDC      | PDC     |
| hsa-miR-32 | PDCD6IP  | PDCD6IP  | -       |
| hsa-miR-32 | PDE10A   | PDE10A   | -       |
| hsa-miR-32 | PDE4D    | PDE4D    | -       |
| hsa-miR-32 | PDS5A    | PDS5A    | -       |
| hsa-miR-32 | PDS5B    | PDS5B    | -       |
| hsa-miR-32 | -        | PDSS1    | PDSS1   |
| hsa-miR-32 | PDXDC1   | PDXDC1   | -       |
| hsa-miR-32 | PDZD2    | PDZD2    | -       |
| hsa-miR-32 | PER2     | PER2     | -       |
| hsa-miR-32 | PEX3     | PEX3     | -       |
| hsa-miR-32 | PFKFB4   | PFKFB4   | -       |
| hsa-miR-32 | -        | PGAM4    | PGAM4   |
| hsa-miR-32 | -        | PGBD2    | PGBD2   |
| hsa-miR-32 | PHF15    | PHF15    | -       |
| hsa-miR-32 | PHF17    | PHF17    | -       |
| hsa-miR-32 | PHF3     | PHF3     | -       |
| hsa-miR-32 | PHLPP2   | PHLPP2   | -       |
| hsa-miR-32 | PHTF2    | PHTF2    | -       |
| hsa-miR-32 | PIK3AP1  | PIK3AP1  | -       |
| hsa-miR-32 | PIK3R3   | PIK3R3   | -       |
| hsa-miR-32 | PIKFYVE  | PIKFYVE  | -       |
| hsa-miR-32 | PIP5K1C  | PIP5K1C  | -       |
| hsa-miR-32 | PITPNA   | PITPNA   | -       |
| hsa-miR-32 | PITPNC1  | PITPNC1  | -       |
| hsa-miR-32 | PITPNM2  | PITPNM2  | -       |
| hsa-miR-32 | PKDCC    | PKDCC    | -       |
| hsa-miR-32 | -        | PKN2     | PKN2    |
| hsa-miR-32 | PLEKHA1  | PLEKHA1  | -       |
| hsa-miR-32 | -        | PLEKHA5  | PLEKHA5 |
| hsa-miR-32 | PLEKHA6  | PLEKHA6  | -       |
| hsa-miR-32 | PLEKHB2  | PLEKHB2  | -       |
| hsa-miR-32 | PMEPA1   | PMEPA1   | -       |
| hsa-miR-32 | -        | POLR3E   | POLR3E  |
| hsa-miR-32 | PPAP2B   | PPAP2B   | -       |
| hsa-miR-32 | PPM1H    | PPM1H    | -       |
| hsa-miR-32 | PPP1R12A | PPP1R12A | -       |
| hsa-miR-32 | PPP1R3D  | PPP1R3D  | -       |
| hsa-miR-32 | PRDM13   | PRDM13   | -       |
| hsa-miR-32 | PRDM15   | PRDM15   | -       |

|            |         |         |         |
|------------|---------|---------|---------|
| hsa-miR-32 | PRKAB2  | PRKAB2  | -       |
| hsa-miR-32 | PRKAR2B | PRKAR2B | -       |
| hsa-miR-32 | PRKCE   | PRKCE   | -       |
| hsa-miR-32 | -       | PSG9    | PSG9    |
| hsa-miR-32 | -       | PSMD5   | PSMD5   |
| hsa-miR-32 | PTEN    | PTEN    | -       |
| hsa-miR-32 | PTF1A   | PTF1A   | -       |
| hsa-miR-32 | PTGER4  | PTGER4  | -       |
| hsa-miR-32 | -       | PTPRC   | PTPRC   |
| hsa-miR-32 | PTPRD   | PTPRD   | -       |
| hsa-miR-32 | PTPRJ   | PTPRJ   | -       |
| hsa-miR-32 | PTPRK   | PTPRK   | -       |
| hsa-miR-32 | PTPRO   | PTPRO   | -       |
| hsa-miR-32 | PVRL1   | PVRL1   | -       |
| hsa-miR-32 | QSER1   | QSER1   | -       |
| hsa-miR-32 | -       | RAB7A   | RAB7A   |
| hsa-miR-32 | RAB8B   | RAB8B   | -       |
| hsa-miR-32 | RAG1    | RAG1    | -       |
| hsa-miR-32 | -       | RAG1AP1 | RAG1AP1 |
| hsa-miR-32 | RAP1A   | RAP1A   | -       |
| hsa-miR-32 | RAP1B   | RAP1B   | -       |
| hsa-miR-32 | -       | RAPGEF3 | RAPGEF3 |
| hsa-miR-32 | RBL2    | RBL2    | -       |
| hsa-miR-32 | RBM47   | RBM47   | -       |
| hsa-miR-32 | RBPM2   | RBPM2   | -       |
| hsa-miR-32 | RECK    | RECK    | -       |
| hsa-miR-32 | REXO1   | REXO1   | -       |
| hsa-miR-32 | RGL1    | RGL1    | -       |
| hsa-miR-32 | RIMS2   | RIMS2   | -       |
| hsa-miR-32 | -       | RIT1    | RIT1    |
| hsa-miR-32 | -       | RNF103  | RNF103  |
| hsa-miR-32 | RNF11   | RNF11   | -       |
| hsa-miR-32 | RNF141  | RNF141  | -       |
| hsa-miR-32 | RNF166  | RNF166  | -       |
| hsa-miR-32 | -       | RNF17   | RNF17   |
| hsa-miR-32 | RNF38   | RNF38   | -       |
| hsa-miR-32 | RNF4    | RNF4    | -       |
| hsa-miR-32 | RNF44   | RNF44   | -       |
| hsa-miR-32 | -       | RNF6    | RNF6    |
| hsa-miR-32 | ROBO1   | ROBO1   | -       |
| hsa-miR-32 | ROBO2   | ROBO2   | -       |
| hsa-miR-32 | -       | RPE65   | RPE65   |
| hsa-miR-32 | RPL15   | RPL15   | -       |
| hsa-miR-32 | RPS6KA4 | RPS6KA4 | -       |
| hsa-miR-32 | RRBP1   | RRBP1   | -       |
| hsa-miR-32 | RRN3    | RRN3    | -       |
| hsa-miR-32 | RSBN1   | RSBN1   | -       |
| hsa-miR-32 | -       | S100G   | S100G   |
| hsa-miR-32 | S1PR1   | S1PR1   | -       |
| hsa-miR-32 | -       | SAP30L  | SAP30L  |
| hsa-miR-32 | SAR1B   | SAR1B   | -       |



|            |          |          |          |
|------------|----------|----------|----------|
| hsa-miR-32 | -        | SCD5     | SCD5     |
| hsa-miR-32 | SCRG1    | SCRG1    | -        |
| hsa-miR-32 | SCUBE3   | SCUBE3   | -        |
| hsa-miR-32 | SDC2     | SDC2     | -        |
| hsa-miR-32 | -        | SDS      | SDS      |
| hsa-miR-32 | SEL1L3   | SEL1L3   | -        |
| hsa-miR-32 | SELT     | SELT     | -        |
| hsa-miR-32 | SEMA3A   | SEMA3A   | -        |
| hsa-miR-32 | SEMA6D   | SEMA6D   | -        |
| hsa-miR-32 | SERTAD2  | SERTAD2  | -        |
| hsa-miR-32 | -        | SFRS2IP  | SFRS2IP  |
| hsa-miR-32 | -        | SFRS3    | SFRS3    |
| hsa-miR-32 | SGK1     | SGK1     | -        |
| hsa-miR-32 | SGK3     | SGK3     | -        |
| hsa-miR-32 | SH3D19   | SH3D19   | -        |
| hsa-miR-32 | SH3PXD2A | SH3PXD2A | -        |
| hsa-miR-32 | SIK1     | SIK1     | -        |
| hsa-miR-32 | SIM2     | SIM2     | -        |
| hsa-miR-32 | -        | SIP1     | SIP1     |
| hsa-miR-32 | SIRPA    | SIRPA    | -        |
| hsa-miR-32 | SKI      | SKI      | -        |
| hsa-miR-32 | SLC12A2  | SLC12A2  | -        |
| hsa-miR-32 | SLC12A5  | SLC12A5  | -        |
| hsa-miR-32 | SLC17A6  | SLC17A6  | -        |
| hsa-miR-32 | SLC24A3  | SLC24A3  | -        |
| hsa-miR-32 | SLC24A4  | SLC24A4  | -        |
| hsa-miR-32 | -        | SLC25A16 | SLC25A16 |
| hsa-miR-32 | SLC25A32 | SLC25A32 | -        |
| hsa-miR-32 | SLC25A36 | SLC25A36 | -        |
| hsa-miR-32 | -        | SLC2A13  | SLC2A13  |
| hsa-miR-32 | SLC2A3   | SLC2A3   | -        |
| hsa-miR-32 | SLC30A7  | SLC30A7  | -        |
| hsa-miR-32 | SLC37A3  | SLC37A3  | -        |
| hsa-miR-32 | SLC4A10  | SLC4A10  | -        |
| hsa-miR-32 | SLC6A1   | SLC6A1   | -        |
| hsa-miR-32 | SLC9A2   | SLC9A2   | -        |
| hsa-miR-32 | SLC9A3R2 | SLC9A3R2 | -        |
| hsa-miR-32 | -        | SMAD9    | SMAD9    |
| hsa-miR-32 | SNAP91   | SNAP91   | -        |
| hsa-miR-32 | SNAPC1   | SNAPC1   | -        |
| hsa-miR-32 | SNN      | SNN      | -        |
| hsa-miR-32 | SOBP     | SOBP     | -        |
| hsa-miR-32 | SOCS6    | SOCS6    | -        |
| hsa-miR-32 | SORCS3   | SORCS3   | -        |
| hsa-miR-32 | SOSTDC1  | SOSTDC1  | -        |
| hsa-miR-32 | SOX11    | SOX11    | -        |
| hsa-miR-32 | SOX4     | SOX4     | -        |
| hsa-miR-32 | SPHK2    | SPHK2    | -        |
| hsa-miR-32 | -        | SPRR2E   | SPRR2E   |
| hsa-miR-32 | SPRYD4   | SPRYD4   | -        |
| hsa-miR-32 | SRPK2    | SRPK2    | -        |

|            |          |            |            |
|------------|----------|------------|------------|
| hsa-miR-32 | SSBP3    | SSBP3      | -          |
| hsa-miR-32 | -        | SSX9       | SSX9       |
| hsa-miR-32 | ST6GAL2  | ST6GAL2    | -          |
| hsa-miR-32 | -        | ST6GALNAC5 | ST6GALNAC5 |
| hsa-miR-32 | STAG2    | STAG2      | -          |
| hsa-miR-32 | STARD13  | STARD13    | -          |
| hsa-miR-32 | -        | STARD3NL   | STARD3NL   |
| hsa-miR-32 | STK39    | STK39      | -          |
| hsa-miR-32 | STRN     | STRN       | -          |
| hsa-miR-32 | STX17    | STX17      | -          |
| hsa-miR-32 | SUDS3    | SUDS3      | -          |
| hsa-miR-32 | SUN1     | SUN1       | -          |
| hsa-miR-32 | -        | SUSD1      | SUSD1      |
| hsa-miR-32 | SUV420H1 | SUV420H1   | -          |
| hsa-miR-32 | SYN2     | SYN2       | -          |
| hsa-miR-32 | SYT1     | SYT1       | -          |
| hsa-miR-32 | TAF1     | TAF1       | -          |
| hsa-miR-32 | TBC1D12  | TBC1D12    | -          |
| hsa-miR-32 | TBC1D30  | TBC1D30    | -          |
| hsa-miR-32 | TBL1XR1  | TBL1XR1    | -          |
| hsa-miR-32 | TBX3     | TBX3       | -          |
| hsa-miR-32 | TCEB3    | TCEB3      | -          |
| hsa-miR-32 | TCF21    | TCF21      | -          |
| hsa-miR-32 | TCF4     | TCF4       | -          |
| hsa-miR-32 | -        | TCFL5      | TCFL5      |
| hsa-miR-32 | -        | TCP11      | TCP11      |
| hsa-miR-32 | TEAD1    | TEAD1      | -          |
| hsa-miR-32 | TECPR2   | TECPR2     | -          |
| hsa-miR-32 | TEF      | TEF        | -          |
| hsa-miR-32 | -        | TESK1      | TESK1      |
| hsa-miR-32 | TEX2     | TEX2       | -          |
| hsa-miR-32 | TFAP2A   | -          | TFAP2A     |
| hsa-miR-32 | -        | TLE1       | TLE1       |
| hsa-miR-32 | TMCC3    | TMCC3      | -          |
| hsa-miR-32 | TMEM143  | TMEM143    | -          |
| hsa-miR-32 | TMEM229A | TMEM229A   | -          |
| hsa-miR-32 | -        | TMEM50A    | TMEM50A    |
| hsa-miR-32 | TMEM50B  | TMEM50B    | -          |
| hsa-miR-32 | -        | TMEM62     | TMEM62     |
| hsa-miR-32 | TMEM87A  | TMEM87A    | -          |
| hsa-miR-32 | -        | TNFRSF13B  | TNFRSF13B  |
| hsa-miR-32 | TNPO1    | TNPO1      | -          |
| hsa-miR-32 | TOB2     | TOB2       | -          |
| hsa-miR-32 | TOP1     | TOP1       | -          |
| hsa-miR-32 | TPPP     | TPPP       | -          |
| hsa-miR-32 | TRAF3    | TRAF3      | -          |
| hsa-miR-32 | TRAK2    | TRAK2      | -          |
| hsa-miR-32 | -        | TRIP13     | TRIP13     |
| hsa-miR-32 | TSC1     | TSC1       | -          |
| hsa-miR-32 | TTC9     | TTC9       | -          |
| hsa-miR-32 | TULP4    | TULP4      | -          |

|            |          |          |         |
|------------|----------|----------|---------|
| hsa-miR-32 | TWF1     | TWF1     | -       |
| hsa-miR-32 | TWIST1   | TWIST1   | -       |
| hsa-miR-32 | UBASH3B  | UBASH3B  | -       |
| hsa-miR-32 | UBE2W    | UBE2W    | -       |
| hsa-miR-32 | UBE2Z    | UBE2Z    | -       |
| hsa-miR-32 | UBXN4    | UBXN4    | -       |
| hsa-miR-32 | UHRF1BP1 | UHRF1BP1 | -       |
| hsa-miR-32 | UQCRB    | UQCRB    | -       |
| hsa-miR-32 | -        | UQCRFS1  | UQCRFS1 |
| hsa-miR-32 | USF2     | USF2     | -       |
| hsa-miR-32 | -        | USP15    | USP15   |
| hsa-miR-32 | USP45    | USP45    | -       |
| hsa-miR-32 | -        | USP49    | USP49   |
| hsa-miR-32 | UVRAG    | UVRAG    | -       |
| hsa-miR-32 | VCL      | VCL      | -       |
| hsa-miR-32 | -        | VDAC2    | VDAC2   |
| hsa-miR-32 | VPS4B    | VPS4B    | -       |
| hsa-miR-32 | -        | VRK3     | VRK3    |
| hsa-miR-32 | VWA5B2   | VWA5B2   | -       |
| hsa-miR-32 | WASL     | WASL     | -       |
| hsa-miR-32 | WDFY3    | WDFY3    | -       |
| hsa-miR-32 | -        | WDR20    | WDR20   |
| hsa-miR-32 | -        | WDR76    | WDR76   |
| hsa-miR-32 | WDR81    | WDR81    | -       |
| hsa-miR-32 | -        | WIPI1    | WIPI1   |
| hsa-miR-32 | WNT5A    | WNT5A    | -       |
| hsa-miR-32 | WWP2     | WWP2     | -       |
| hsa-miR-32 | XRN1     | XRN1     | -       |
| hsa-miR-32 | ZBTB40   | ZBTB40   | -       |
| hsa-miR-32 | -        | ZC3H8    | ZC3H8   |
| hsa-miR-32 | ZCCHC2   | ZCCHC2   | -       |
| hsa-miR-32 | -        | ZCCHC4   | ZCCHC4  |
| hsa-miR-32 | ZDHHC3   | ZDHHC3   | -       |
| hsa-miR-32 | ZDHHC5   | ZDHHC5   | -       |
| hsa-miR-32 | ZEB2     | ZEB2     | -       |
| hsa-miR-32 | ZFC3H1   | ZFC3H1   | -       |
| hsa-miR-32 | ZFHX3    | ZFHX3    | -       |
| hsa-miR-32 | ZFPM2    | ZFPM2    | -       |
| hsa-miR-32 | -        | ZNF224   | ZNF224  |
| hsa-miR-32 | ZNF238   | ZNF238   | -       |
| hsa-miR-32 | ZNF385B  | ZNF385B  | -       |
| hsa-miR-32 | ZNF385D  | ZNF385D  | -       |
| hsa-miR-32 | ZNF469   | ZNF469   | -       |
| hsa-miR-32 | ZNF512B  | ZNF512B  | -       |
| hsa-miR-32 | ZNF521   | ZNF521   | -       |
| hsa-miR-32 | -        | ZNF530   | ZNF530  |
| hsa-miR-32 | -        | ZNF536   | ZNF536  |
| hsa-miR-32 | -        | ZNF595   | ZNF595  |
| hsa-miR-32 | -        | ZNF626   | ZNF626  |
| hsa-miR-32 | ZNF654   | ZNF654   | -       |
| hsa-miR-32 | -        | ZNF804A  | ZNF804A |

|             |           |           |           |
|-------------|-----------|-----------|-----------|
| hsa-miR-32  | -         | ZNF808    | ZNF808    |
| hsa-miR-32  | -         | ZNRF4     | ZNRF4     |
| hsa-miR-329 | -         | AAMP      | AAMP      |
| hsa-miR-329 | ABCA12    | ABCA12    | -         |
| hsa-miR-329 | -         | ABCC5     | ABCC5     |
| hsa-miR-329 | ADAMTS4   | ADAMTS4   | -         |
| hsa-miR-329 | -         | ADC       | ADC       |
| hsa-miR-329 | -         | ADD2      | ADD2      |
| hsa-miR-329 | ADRA2B    | ADRA2B    | -         |
| hsa-miR-329 | AGAP3     | AGAP3     | -         |
| hsa-miR-329 | AKAP1     | AKAP1     | -         |
| hsa-miR-329 | -         | AKAP7     | AKAP7     |
| hsa-miR-329 | -         | ALDOA     | ALDOA     |
| hsa-miR-329 | -         | ALKBH3    | ALKBH3    |
| hsa-miR-329 | ALKBH5    | ALKBH5    | -         |
| hsa-miR-329 | -         | ANAPC11   | ANAPC11   |
| hsa-miR-329 | -         | ANKDD1A   | ANKDD1A   |
| hsa-miR-329 | -         | ANKRD13A  | ANKRD13A  |
| hsa-miR-329 | -         | APBA1     | APBA1     |
| hsa-miR-329 | APBA2     | APBA2     | -         |
| hsa-miR-329 | -         | APOBEC2   | APOBEC2   |
| hsa-miR-329 | -         | AQP3      | AQP3      |
| hsa-miR-329 | -         | ARHGAP21  | ARHGAP21  |
| hsa-miR-329 | -         | ARHGAP27  | ARHGAP27  |
| hsa-miR-329 | ARHGEF10L | ARHGEF10L | -         |
| hsa-miR-329 | ARL4A     | ARL4A     | -         |
| hsa-miR-329 | -         | ASB16     | ASB16     |
| hsa-miR-329 | -         | ASCC3     | ASCC3     |
| hsa-miR-329 | -         | ASNS      | ASNS      |
| hsa-miR-329 | -         | ASPH      | ASPH      |
| hsa-miR-329 | -         | ATAD3B    | ATAD3B    |
| hsa-miR-329 | -         | ATF3      | ATF3      |
| hsa-miR-329 | -         | ATG4B     | ATG4B     |
| hsa-miR-329 | -         | ATP5G1    | ATP5G1    |
| hsa-miR-329 | ATP6V1C1  | ATP6V1C1  | -         |
| hsa-miR-329 | -         | ATP6V1G3  | ATP6V1G3  |
| hsa-miR-329 | -         | ATRX      | ATRX      |
| hsa-miR-329 | B4GALT5   | B4GALT5   | -         |
| hsa-miR-329 | BAHCC1    | BAHCC1    | -         |
| hsa-miR-329 | -         | BCAP31    | BCAP31    |
| hsa-miR-329 | -         | BCAR1     | BCAR1     |
| hsa-miR-329 | BCL7A     | BCL7A     | -         |
| hsa-miR-329 | BMF       | BMF       | -         |
| hsa-miR-329 | BMPR2     | BMPR2     | -         |
| hsa-miR-329 | -         | BPI       | BPI       |
| hsa-miR-329 | -         | BRD3      | BRD3      |
| hsa-miR-329 | -         | BTK       | BTK       |
| hsa-miR-329 | -         | C10orf137 | C10orf137 |
| hsa-miR-329 | -         | C10orf35  | C10orf35  |
| hsa-miR-329 | -         | C11orf53  | C11orf53  |
| hsa-miR-329 | -         | C14orf102 | C14orf102 |

|             |          |          |          |
|-------------|----------|----------|----------|
| hsa-miR-329 | C16orf70 | C16orf70 | -        |
| hsa-miR-329 | -        | C1orf103 | C1orf103 |
| hsa-miR-329 | C1orf216 | C1orf216 | -        |
| hsa-miR-329 | -        | C20orf62 | C20orf62 |
| hsa-miR-329 | -        | C22orf26 | C22orf26 |
| hsa-miR-329 | -        | C3orf39  | C3orf39  |
| hsa-miR-329 | C9orf5   | C9orf5   | -        |
| hsa-miR-329 | -        | CABC1    | CABC1    |
| hsa-miR-329 | -        | CABLES1  | CABLES1  |
| hsa-miR-329 | -        | CADM1    | CADM1    |
| hsa-miR-329 | -        | CADPS2   | CADPS2   |
| hsa-miR-329 | -        | CAMK1D   | CAMK1D   |
| hsa-miR-329 | -        | CAMKV    | CAMKV    |
| hsa-miR-329 | -        | CAP1     | CAP1     |
| hsa-miR-329 | -        | CARD11   | CARD11   |
| hsa-miR-329 | -        | CARD14   | CARD14   |
| hsa-miR-329 | -        | CARD8    | CARD8    |
| hsa-miR-329 | -        | CASP8AP2 | CASP8AP2 |
| hsa-miR-329 | CASZ1    | CASZ1    | -        |
| hsa-miR-329 | -        | CBX8     | CBX8     |
| hsa-miR-329 | -        | CCDC28A  | CCDC28A  |
| hsa-miR-329 | CCDC85A  | CCDC85A  | -        |
| hsa-miR-329 | -        | CCDC91   | CCDC91   |
| hsa-miR-329 | -        | CDADC1   | CDADC1   |
| hsa-miR-329 | -        | CDAN1    | CDAN1    |
| hsa-miR-329 | -        | CDC42EP5 | CDC42EP5 |
| hsa-miR-329 | -        | CDCA4    | CDCA4    |
| hsa-miR-329 | -        | CDH10    | CDH10    |
| hsa-miR-329 | -        | CDYL2    | CDYL2    |
| hsa-miR-329 | CELF6    | CELF6    | -        |
| hsa-miR-329 | -        | CFLAR    | CFLAR    |
| hsa-miR-329 | -        | CHD7     | CHD7     |
| hsa-miR-329 | -        | CHMP7    | CHMP7    |
| hsa-miR-329 | CHRD1    | CHRD1    | -        |
| hsa-miR-329 | -        | CLDN16   | CLDN16   |
| hsa-miR-329 | -        | CLN6     | CLN6     |
| hsa-miR-329 | CNTN3    | CNTN3    | -        |
| hsa-miR-329 | -        | COL13A1  | COL13A1  |
| hsa-miR-329 | -        | COL17A1  | COL17A1  |
| hsa-miR-329 | -        | COL9A3   | COL9A3   |
| hsa-miR-329 | CPA4     | CPA4     | -        |
| hsa-miR-329 | CPEB4    | CPEB4    | -        |
| hsa-miR-329 | -        | CR2      | CR2      |
| hsa-miR-329 | CRY2     | CRY2     | -        |
| hsa-miR-329 | -        | CRYBA4   | CRYBA4   |
| hsa-miR-329 | CSNK1G3  | CSNK1G3  | -        |
| hsa-miR-329 | CSNK2A1  | CSNK2A1  | -        |
| hsa-miR-329 | -        | CTDP1    | CTDP1    |
| hsa-miR-329 | CTNND1   | CTNND1   | -        |
| hsa-miR-329 | -        | CXCL12   | CXCL12   |
| hsa-miR-329 | -        | CYP4X1   | CYP4X1   |

|             |          |           |           |
|-------------|----------|-----------|-----------|
| hsa-miR-329 | D4S234E  | D4S234E   | -         |
| hsa-miR-329 | DAPK1    | DAPK1     | -         |
| hsa-miR-329 | -        | DKK3      | DKK3      |
| hsa-miR-329 | -        | DLC1      | DLC1      |
| hsa-miR-329 | -        | DLST      | DLST      |
| hsa-miR-329 | -        | DOHH      | DOHH      |
| hsa-miR-329 | -        | DPY19L2P1 | DPY19L2P1 |
| hsa-miR-329 | DPYSL3   | DPYSL3    | -         |
| hsa-miR-329 | -        | DUSP2     | DUSP2     |
| hsa-miR-329 | -        | EFNA5     | EFNA5     |
| hsa-miR-329 | -        | EGFLAM    | EGFLAM    |
| hsa-miR-329 | -        | EIF4G1    | EIF4G1    |
| hsa-miR-329 | -        | EIF4G3    | EIF4G3    |
| hsa-miR-329 | -        | ENDOG     | ENDOG     |
| hsa-miR-329 | -        | ENSA      | ENSA      |
| hsa-miR-329 | -        | EPB41L3   | EPB41L3   |
| hsa-miR-329 | -        | EPO       | EPO       |
| hsa-miR-329 | ERC2     | ERC2      | -         |
| hsa-miR-329 | ERI3     | ERI3      | -         |
| hsa-miR-329 | ESRRG    | ESRRG     | -         |
| hsa-miR-329 | -        | F2RL1     | F2RL1     |
| hsa-miR-329 | FAM120A  | FAM120A   | -         |
| hsa-miR-329 | FAM178A  | FAM178A   | -         |
| hsa-miR-329 | -        | FAM90A1   | FAM90A1   |
| hsa-miR-329 | -        | FANCM     | FANCM     |
| hsa-miR-329 | -        | FARSA     | FARSA     |
| hsa-miR-329 | FBN1     | FBN1      | -         |
| hsa-miR-329 | -        | FEV       | FEV       |
| hsa-miR-329 | -        | FGF4      | FGF4      |
| hsa-miR-329 | FLJ36031 | FLJ36031  | -         |
| hsa-miR-329 | -        | FNDC7     | FNDC7     |
| hsa-miR-329 | FOX12    | FOX12     | -         |
| hsa-miR-329 | -        | FOXR2     | FOXR2     |
| hsa-miR-329 | -        | FRMD6     | FRMD6     |
| hsa-miR-329 | -        | FSTL3     | FSTL3     |
| hsa-miR-329 | GABRB2   | GABRB2    | -         |
| hsa-miR-329 | GIGYF1   | GIGYF1    | -         |
| hsa-miR-329 | -        | GLUD2     | GLUD2     |
| hsa-miR-329 | -        | GPR4      | GPR4      |
| hsa-miR-329 | -        | GPR77     | GPR77     |
| hsa-miR-329 | -        | GRIA3     | GRIA3     |
| hsa-miR-329 | GRIK2    | GRIK2     | -         |
| hsa-miR-329 | -        | GRIN2A    | GRIN2A    |
| hsa-miR-329 | -        | GSTM3     | GSTM3     |
| hsa-miR-329 | H3F3B    | H3F3B     | -         |
| hsa-miR-329 | -        | HACE1     | HACE1     |
| hsa-miR-329 | -        | HAPLN3    | HAPLN3    |
| hsa-miR-329 | -        | HCST      | HCST      |
| hsa-miR-329 | -        | HERC2     | HERC2     |
| hsa-miR-329 | -        | HIF3A     | HIF3A     |
| hsa-miR-329 | HIPK1    | HIPK1     | -         |

|             |        |           |           |
|-------------|--------|-----------|-----------|
| hsa-miR-329 | -      | HIST2H2BF | HIST2H2BF |
| hsa-miR-329 | -      | HLA-DMA   | HLA-DMA   |
| hsa-miR-329 | -      | HSD17B6   | HSD17B6   |
| hsa-miR-329 | HSPA5  | HSPA5     | -         |
| hsa-miR-329 | -      | IARS      | IARS      |
| hsa-miR-329 | IGDCC3 | IGDCC3    | -         |
| hsa-miR-329 | -      | IGF2      | IGF2      |
| hsa-miR-329 | -      | IGFBP4    | IGFBP4    |
| hsa-miR-329 | -      | IGLL1     | IGLL1     |
| hsa-miR-329 | -      | IL11RA    | IL11RA    |
| hsa-miR-329 | INHBB  | INHBB     | -         |
| hsa-miR-329 | -      | JAGN1     | JAGN1     |
| hsa-miR-329 | KCNC1  | KCNC1     | -         |
| hsa-miR-329 | -      | KCNH2     | KCNH2     |
| hsa-miR-329 | -      | KCNH8     | KCNH8     |
| hsa-miR-329 | -      | KCNJ6     | KCNJ6     |
| hsa-miR-329 | KCNS2  | KCNS2     | -         |
| hsa-miR-329 | KCTD11 | KCTD11    | -         |
| hsa-miR-329 | KDEL2  | KDEL2     | -         |
| hsa-miR-329 | KDM5C  | KDM5C     | -         |
| hsa-miR-329 | KHNYN  | KHNYN     | -         |
| hsa-miR-329 | -      | KLRG1     | KLRG1     |
| hsa-miR-329 | KRIT1  | KRIT1     | -         |
| hsa-miR-329 | -      | LAMB3     | LAMB3     |
| hsa-miR-329 | LARP4B | LARP4B    | -         |
| hsa-miR-329 | -      | LASS3     | LASS3     |
| hsa-miR-329 | LBH    | LBH       | -         |
| hsa-miR-329 | -      | LDOC1L    | LDOC1L    |
| hsa-miR-329 | LHFPL3 | LHFPL3    | -         |
| hsa-miR-329 | -      | LHX4      | LHX4      |
| hsa-miR-329 | -      | LIG1      | LIG1      |
| hsa-miR-329 | LLGL1  | -         | LLGL1     |
| hsa-miR-329 | LMO2   | LMO2      | -         |
| hsa-miR-329 | -      | LOH12CR1  | LOH12CR1  |
| hsa-miR-329 | -      | LRRC27    | LRRC27    |
| hsa-miR-329 | -      | LRRC47    | LRRC47    |
| hsa-miR-329 | -      | LRRC57    | LRRC57    |
| hsa-miR-329 | -      | LRRTM4    | LRRTM4    |
| hsa-miR-329 | -      | LYRM1     | LYRM1     |
| hsa-miR-329 | MAPRE1 | MAPRE1    | -         |
| hsa-miR-329 | -      | MARK2     | MARK2     |
| hsa-miR-329 | MATR3  | MATR3     | -         |
| hsa-miR-329 | -      | MCAM      | MCAM      |
| hsa-miR-329 | -      | MCM5      | MCM5      |
| hsa-miR-329 | MED14  | MED14     | -         |
| hsa-miR-329 | -      | MESDC1    | MESDC1    |
| hsa-miR-329 | -      | METTL2B   | METTL2B   |
| hsa-miR-329 | MGAT3  | MGAT3     | -         |
| hsa-miR-329 | MICAL3 | MICAL3    | -         |
| hsa-miR-329 | -      | MIOX      | MIOX      |
| hsa-miR-329 | -      | MKRN1     | MKRN1     |

|             |         |         |        |
|-------------|---------|---------|--------|
| hsa-miR-329 | -       | MLYCD   | MLYCD  |
| hsa-miR-329 | MON2    | MON2    | -      |
| hsa-miR-329 | -       | MRAS    | MRAS   |
| hsa-miR-329 | MYCL1   | MYCL1   | -      |
| hsa-miR-329 | -       | MYH15   | MYH15  |
| hsa-miR-329 | -       | MYOZ2   | MYOZ2  |
| hsa-miR-329 | N4BP3   | N4BP3   | -      |
| hsa-miR-329 | NAA15   | NAA15   | -      |
| hsa-miR-329 | -       | NALCN   | NALCN  |
| hsa-miR-329 | NCOA1   | NCOA1   | -      |
| hsa-miR-329 | -       | NDEL1   | NDEL1  |
| hsa-miR-329 | NDUFAF3 | NDUFAF3 | -      |
| hsa-miR-329 | -       | NF2     | NF2    |
| hsa-miR-329 | -       | NFE2    | NFE2   |
| hsa-miR-329 | NHS     | NHS     | -      |
| hsa-miR-329 | NLGN2   | NLGN2   | -      |
| hsa-miR-329 | -       | NLRP9   | NLRP9  |
| hsa-miR-329 | -       | NME1    | NME1   |
| hsa-miR-329 | NOG     | NOG     | -      |
| hsa-miR-329 | NOS1AP  | NOS1AP  | -      |
| hsa-miR-329 | -       | NOVA2   | NOVA2  |
| hsa-miR-329 | -       | NPC1    | NPC1   |
| hsa-miR-329 | NPNT    | NPNT    | -      |
| hsa-miR-329 | -       | NR2E3   | NR2E3  |
| hsa-miR-329 | -       | NRBF2   | NRBF2  |
| hsa-miR-329 | -       | NRG1    | NRG1   |
| hsa-miR-329 | -       | NRP2    | NRP2   |
| hsa-miR-329 | -       | NSMAF   | NSMAF  |
| hsa-miR-329 | -       | NT5C1B  | NT5C1B |
| hsa-miR-329 | -       | NTHL1   | NTHL1  |
| hsa-miR-329 | -       | NUDT3   | NUDT3  |
| hsa-miR-329 | NUMBL   | NUMBL   | -      |
| hsa-miR-329 | -       | NYX     | NYX    |
| hsa-miR-329 | OLA1    | OLA1    | -      |
| hsa-miR-329 | OPCML   | OPCML   | -      |
| hsa-miR-329 | -       | PANX2   | PANX2  |
| hsa-miR-329 | PAPD5   | PAPD5   | -      |
| hsa-miR-329 | PCDHA1  | PCDHA1  | -      |
| hsa-miR-329 | PCDHA10 | PCDHA10 | -      |
| hsa-miR-329 | PCDHA11 | PCDHA11 | -      |
| hsa-miR-329 | PCDHA12 | PCDHA12 | -      |
| hsa-miR-329 | PCDHA13 | PCDHA13 | -      |
| hsa-miR-329 | PCDHA2  | PCDHA2  | -      |
| hsa-miR-329 | PCDHA3  | PCDHA3  | -      |
| hsa-miR-329 | PCDHA4  | PCDHA4  | -      |
| hsa-miR-329 | PCDHA5  | PCDHA5  | -      |
| hsa-miR-329 | PCDHA6  | PCDHA6  | -      |
| hsa-miR-329 | PCDHA7  | PCDHA7  | -      |
| hsa-miR-329 | PCDHA8  | PCDHA8  | -      |
| hsa-miR-329 | PCDHA9  | PCDHA9  | -      |
| hsa-miR-329 | PCDHAC1 | PCDHAC1 | -      |



|             |         |         |        |
|-------------|---------|---------|--------|
| hsa-miR-329 | PCDHAC2 | PCDHAC2 | -      |
| hsa-miR-329 | PCGF2   | PCGF2   | -      |
| hsa-miR-329 | PCGF3   | PCGF3   | -      |
| hsa-miR-329 | PCSK2   | PCSK2   | -      |
| hsa-miR-329 | PDE3A   | PDE3A   | -      |
| hsa-miR-329 | PDE4D   | PDE4D   | -      |
| hsa-miR-329 | PDE4DIP | PDE4DIP | -      |
| hsa-miR-329 | PDE5A   | PDE5A   | -      |
| hsa-miR-329 | -       | PDGFB   | PDGFB  |
| hsa-miR-329 | PDS5A   | PDS5A   | -      |
| hsa-miR-329 | -       | PEX14   | PEX14  |
| hsa-miR-329 | PHF21A  | -       | PHF21A |
| hsa-miR-329 | -       | PHF5A   | PHF5A  |
| hsa-miR-329 | -       | PIF1    | PIF1   |
| hsa-miR-329 | PLAA    | PLAA    | -      |
| hsa-miR-329 | -       | PLP1    | PLP1   |
| hsa-miR-329 | -       | PNLDC1  | PNLDC1 |
| hsa-miR-329 | -       | POMT1   | POMT1  |
| hsa-miR-329 | -       | PPCS    | PPCS   |
| hsa-miR-329 | PPFIA4  | PPFIA4  | -      |
| hsa-miR-329 | PRDM11  | PRDM11  | -      |
| hsa-miR-329 | PRDM16  | -       | PRDM16 |
| hsa-miR-329 | -       | PRKD1   | PRKD1  |
| hsa-miR-329 | -       | PROCR   | PROCR  |
| hsa-miR-329 | -       | PROK2   | PROK2  |
| hsa-miR-329 | -       | PRPF18  | PRPF18 |
| hsa-miR-329 | -       | PRPF4B  | PRPF4B |
| hsa-miR-329 | PRR12   | -       | PRR12  |
| hsa-miR-329 | PRUNE2  | PRUNE2  | -      |
| hsa-miR-329 | -       | PSAPL1  | PSAPL1 |
| hsa-miR-329 | PTBP2   | PTBP2   | -      |
| hsa-miR-329 | -       | PTDSS1  | PTDSS1 |
| hsa-miR-329 | -       | PTPLA   | PTPLA  |
| hsa-miR-329 | PTPN1   | PTPN1   | -      |
| hsa-miR-329 | PTPN9   | PTPN9   | -      |
| hsa-miR-329 | -       | PTPRF   | PTPRF  |
| hsa-miR-329 | PTPRG   | PTPRG   | -      |
| hsa-miR-329 | PTPRJ   | PTPRJ   | -      |
| hsa-miR-329 | RAB1A   | RAB1A   | -      |
| hsa-miR-329 | RAB6B   | RAB6B   | -      |
| hsa-miR-329 | RABEP1  | RABEP1  | -      |
| hsa-miR-329 | RABGAP1 | RABGAP1 | -      |
| hsa-miR-329 | -       | RABL5   | RABL5  |
| hsa-miR-329 | RAI1    | RAI1    | -      |
| hsa-miR-329 | RBPMS   | RBPMS   | -      |
| hsa-miR-329 | -       | REEP4   | REEP4  |
| hsa-miR-329 | -       | RELA    | RELA   |
| hsa-miR-329 | RGAG4   | RGAG4   | -      |
| hsa-miR-329 | -       | RHPN2   | RHPN2  |
| hsa-miR-329 | -       | RLN1    | RLN1   |
| hsa-miR-329 | -       | RMND1   | RMND1  |

|             |          |            |            |
|-------------|----------|------------|------------|
| hsa-miR-329 | RNF139   | RNF139     | -          |
| hsa-miR-329 | RNF165   | RNF165     | -          |
| hsa-miR-329 | RNF214   | RNF214     | -          |
| hsa-miR-329 | -        | RNF7       | RNF7       |
| hsa-miR-329 | -        | ROBO4      | ROBO4      |
| hsa-miR-329 | -        | RPL15      | RPL15      |
| hsa-miR-329 | -        | RPL26L1    | RPL26L1    |
| hsa-miR-329 | -        | RTN4R      | RTN4R      |
| hsa-miR-329 | -        | RUVBL1     | RUVBL1     |
| hsa-miR-329 | -        | SCGB1D4    | SCGB1D4    |
| hsa-miR-329 | -        | SCGN       | SCGN       |
| hsa-miR-329 | -        | SCN8A      | SCN8A      |
| hsa-miR-329 | -        | SEC14L3    | SEC14L3    |
| hsa-miR-329 | SEC63    | SEC63      | -          |
| hsa-miR-329 | -        | SERPINA7   | SERPINA7   |
| hsa-miR-329 | -        | SFN        | SFN        |
| hsa-miR-329 | -        | SIAH2      | SIAH2      |
| hsa-miR-329 | -        | SIGLECP3   | SIGLECP3   |
| hsa-miR-329 | -        | SIM1       | SIM1       |
| hsa-miR-329 | -        | SLC26A11   | SLC26A11   |
| hsa-miR-329 | SLC26A2  | SLC26A2    | -          |
| hsa-miR-329 | -        | SLC34A1    | SLC34A1    |
| hsa-miR-329 | -        | SLC35A1    | SLC35A1    |
| hsa-miR-329 | SLC39A10 | SLC39A10   | -          |
| hsa-miR-329 | -        | SLC41A3    | SLC41A3    |
| hsa-miR-329 | -        | SLC4A11    | SLC4A11    |
| hsa-miR-329 | -        | SLC5A6     | SLC5A6     |
| hsa-miR-329 | SLC6A6   | SLC6A6     | -          |
| hsa-miR-329 | -        | SLTM       | SLTM       |
| hsa-miR-329 | SMARCAD1 | SMARCAD1   | -          |
| hsa-miR-329 | -        | SMCR7      | SMCR7      |
| hsa-miR-329 | -        | SNAI3      | SNAI3      |
| hsa-miR-329 | SOCS6    | SOCS6      | -          |
| hsa-miR-329 | -        | SOHLH2     | SOHLH2     |
| hsa-miR-329 | SP4      | SP4        | -          |
| hsa-miR-329 | SPCS2    | SPCS2      | -          |
| hsa-miR-329 | SPEN     | SPEN       | -          |
| hsa-miR-329 | -        | SPIN2B     | SPIN2B     |
| hsa-miR-329 | -        | SPRYD4     | SPRYD4     |
| hsa-miR-329 | -        | SPTBN2     | SPTBN2     |
| hsa-miR-329 | -        | SQSTM1     | SQSTM1     |
| hsa-miR-329 | SRGAP3   | SRGAP3     | -          |
| hsa-miR-329 | SSH1     | SSH1       | -          |
| hsa-miR-329 | -        | ST6GALNAC6 | ST6GALNAC6 |
| hsa-miR-329 | STAG3L4  | STAG3L4    | -          |
| hsa-miR-329 | -        | STUB1      | STUB1      |
| hsa-miR-329 | -        | SVOP       | SVOP       |
| hsa-miR-329 | SYNGAP1  | SYNGAP1    | -          |
| hsa-miR-329 | -        | SYT15      | SYT15      |
| hsa-miR-329 | TARDBP   | TARDBP     | -          |
| hsa-miR-329 | -        | TATDN2     | TATDN2     |

|             |         |          |          |
|-------------|---------|----------|----------|
| hsa-miR-329 | TBC1D9  | TBC1D9   | -        |
| hsa-miR-329 | TBX5    | TBX5     | -        |
| hsa-miR-329 | TCF7L1  | TCF7L1   | -        |
| hsa-miR-329 | -       | TDRD6    | TDRD6    |
| hsa-miR-329 | -       | TENC1    | TENC1    |
| hsa-miR-329 | -       | TIE1     | TIE1     |
| hsa-miR-329 | -       | TMCO7    | TMCO7    |
| hsa-miR-329 | -       | TMED1    | TMED1    |
| hsa-miR-329 | -       | TMEM126B | TMEM126B |
| hsa-miR-329 | -       | TMEM62   | TMEM62   |
| hsa-miR-329 | -       | TNFSF10  | TNFSF10  |
| hsa-miR-329 | -       | TNFSF11  | TNFSF11  |
| hsa-miR-329 | TOB2    | TOB2     | -        |
| hsa-miR-329 | -       | TOR1AIP1 | TOR1AIP1 |
| hsa-miR-329 | TOR3A   | TOR3A    | -        |
| hsa-miR-329 | -       | TPCN2    | TPCN2    |
| hsa-miR-329 | -       | TRAFD1   | TRAFD1   |
| hsa-miR-329 | TRERF1  | TRERF1   | -        |
| hsa-miR-329 | TRIM33  | TRIM33   | -        |
| hsa-miR-329 | -       | TRIM48   | TRIM48   |
| hsa-miR-329 | -       | TRIM7    | TRIM7    |
| hsa-miR-329 | -       | TRPM3    | TRPM3    |
| hsa-miR-329 | TTC7A   | TTC7A    | -        |
| hsa-miR-329 | -       | UBE2D2   | UBE2D2   |
| hsa-miR-329 | UNC45B  | UNC45B   | -        |
| hsa-miR-329 | UQCC    | UQCC     | -        |
| hsa-miR-329 | -       | USF1     | USF1     |
| hsa-miR-329 | USF2    | USF2     | -        |
| hsa-miR-329 | -       | USP19    | USP19    |
| hsa-miR-329 | -       | USP30    | USP30    |
| hsa-miR-329 | -       | USP7     | USP7     |
| hsa-miR-329 | USP9X   | USP9X    | -        |
| hsa-miR-329 | VAMP7   | VAMP7    | -        |
| hsa-miR-329 | VANGL2  | VANGL2   | -        |
| hsa-miR-329 | -       | VENTX    | VENTX    |
| hsa-miR-329 | -       | VPS4B    | VPS4B    |
| hsa-miR-329 | VSX2    | VSX2     | -        |
| hsa-miR-329 | WAPAL   | WAPAL    | -        |
| hsa-miR-329 | -       | WDR66    | WDR66    |
| hsa-miR-329 | -       | WDR69    | WDR69    |
| hsa-miR-329 | WDR82   | WDR82    | -        |
| hsa-miR-329 | -       | WFDC3    | WFDC3    |
| hsa-miR-329 | WIPF2   | WIPF2    | -        |
| hsa-miR-329 | WNT1    | WNT1     | -        |
| hsa-miR-329 | -       | XKR9     | XKR9     |
| hsa-miR-329 | ZBTB39  | ZBTB39   | -        |
| hsa-miR-329 | -       | ZC3HC1   | ZC3HC1   |
| hsa-miR-329 | -       | ZCCHC10  | ZCCHC10  |
| hsa-miR-329 | ZCCHC24 | ZCCHC24  | -        |
| hsa-miR-329 | ZER1    | ZER1     | -        |
| hsa-miR-329 | ZNF238  | ZNF238   | -        |

|                |          |          |         |
|----------------|----------|----------|---------|
| hsa-miR-329    | -        | ZNF304   | ZNF304  |
| hsa-miR-329    | -        | ZNF425   | ZNF425  |
| hsa-miR-329    | -        | ZNF786   | ZNF786  |
| hsa-miR-329    | -        | ZNF81    | ZNF81   |
| hsa-miR-329    | -        | ZSCAN20  | ZSCAN20 |
| hsa-miR-329    | ZZZ3     | ZZZ3     | -       |
| hsa-miR-337-3p | ABCA5    | ABCA5    | -       |
| hsa-miR-337-3p | -        | ABCG8    | ABCG8   |
| hsa-miR-337-3p | ABHD5    | ABHD5    | -       |
| hsa-miR-337-3p | -        | ABHD6    | ABHD6   |
| hsa-miR-337-3p | -        | ACAA1    | ACAA1   |
| hsa-miR-337-3p | ACAN     | ACAN     | -       |
| hsa-miR-337-3p | ACBD5    | ACBD5    | -       |
| hsa-miR-337-3p | ACBD7    | ACBD7    | -       |
| hsa-miR-337-3p | ACPP     | ACPP     | -       |
| hsa-miR-337-3p | ACSL3    | ACSL3    | -       |
| hsa-miR-337-3p | ACSL6    | ACSL6    | -       |
| hsa-miR-337-3p | ACTN1    | ACTN1    | -       |
| hsa-miR-337-3p | ACVR1    | ACVR1    | -       |
| hsa-miR-337-3p | ACVR1B   | ACVR1B   | -       |
| hsa-miR-337-3p | ACVR1C   | ACVR1C   | -       |
| hsa-miR-337-3p | ADAM28   | ADAM28   | -       |
| hsa-miR-337-3p | ADAMTS19 | ADAMTS19 | -       |
| hsa-miR-337-3p | ADARB1   | ADARB1   | -       |
| hsa-miR-337-3p | ADD2     | ADD2     | -       |
| hsa-miR-337-3p | ADO      | ADO      | -       |
| hsa-miR-337-3p | -        | ADRA1A   | ADRA1A  |
| hsa-miR-337-3p | AFAP1L2  | AFAP1L2  | -       |
| hsa-miR-337-3p | AFF4     | AFF4     | -       |
| hsa-miR-337-3p | AGPAT5   | AGPAT5   | -       |
| hsa-miR-337-   | AGTR2    | AGTR2    | -       |

|                |          |          |         |
|----------------|----------|----------|---------|
| 3p             |          |          |         |
| hsa-miR-337-3p | -        | AIM1L    | AIM1L   |
| hsa-miR-337-3p | AK2      | AK2      | -       |
| hsa-miR-337-3p | AK3      | AK3      | -       |
| hsa-miR-337-3p | AKAP11   | AKAP11   | -       |
| hsa-miR-337-3p | AKAP6    | AKAP6    | -       |
| hsa-miR-337-3p | AKAP8    | AKAP8    | -       |
| hsa-miR-337-3p | ALCAM    | ALCAM    | -       |
| hsa-miR-337-3p | ALG13    | ALG13    | -       |
| hsa-miR-337-3p | ALG9     | ALG9     | -       |
| hsa-miR-337-3p | ALS2     | ALS2     | -       |
| hsa-miR-337-3p | AMMECR1L | AMMECR1L | -       |
| hsa-miR-337-3p | AMOT     | AMOT     | -       |
| hsa-miR-337-3p | ANAPC16  | ANAPC16  | -       |
| hsa-miR-337-3p | ANGPT2   | ANGPT2   | -       |
| hsa-miR-337-3p | ANKFY1   | ANKFY1   | -       |
| hsa-miR-337-3p | -        | ANKRA2   | ANKRA2  |
| hsa-miR-337-3p | ANKRD12  | ANKRD12  | -       |
| hsa-miR-337-3p | -        | ANKRD17  | ANKRD17 |
| hsa-miR-337-3p | ANKRD36B | ANKRD36B | -       |
| hsa-miR-337-3p | ANKRD7   | ANKRD7   | -       |
| hsa-miR-337-3p | ANXA1    | ANXA1    | -       |
| hsa-miR-337-3p | AOX1     | AOX1     | -       |
| hsa-miR-337-3p | AP1AR    | AP1AR    | -       |
| hsa-miR-337-3p | AP1S3    | -        | AP1S3   |
| hsa-miR-337-3p | AP3M2    | AP3M2    | -       |
| hsa-miR-337-3p | APBB2    | APBB2    | -       |
| hsa-miR-337-3p | API5     | API5     | -       |
| hsa-miR-337-3p | APLF     | APLF     | -       |

|                |          |          |       |
|----------------|----------|----------|-------|
| 3p             |          |          |       |
| hsa-miR-337-3p | APOBEC3F | APOBEC3F | -     |
| hsa-miR-337-3p | APOLD1   | APOLD1   | -     |
| hsa-miR-337-3p | APPBP2   | APPBP2   | -     |
| hsa-miR-337-3p | APPL1    | APPL1    | -     |
| hsa-miR-337-3p | ARFGEF1  | ARFGEF1  | -     |
| hsa-miR-337-3p | ARFIP2   | ARFIP2   | -     |
| hsa-miR-337-3p | ARHGAP6  | ARHGAP6  | -     |
| hsa-miR-337-3p | ARHGEF6  | ARHGEF6  | -     |
| hsa-miR-337-3p | ARID2    | ARID2    | -     |
| hsa-miR-337-3p | ARID4A   | ARID4A   | -     |
| hsa-miR-337-3p | ARIH2    | ARIH2    | -     |
| hsa-miR-337-3p | ARL4A    | ARL4A    | -     |
| hsa-miR-337-3p | ARL5B    | ARL5B    | -     |
| hsa-miR-337-3p | ARL6     | ARL6     | -     |
| hsa-miR-337-3p | ARL6IP5  | ARL6IP5  | -     |
| hsa-miR-337-3p | ARMC1    | ARMC1    | -     |
| hsa-miR-337-3p | ARPP21   | ARPP21   | -     |
| hsa-miR-337-3p | ARSB     | ARSB     | -     |
| hsa-miR-337-3p | ARSK     | ARSK     | -     |
| hsa-miR-337-3p | ASAP1    | ASAP1    | -     |
| hsa-miR-337-3p | ASCL1    | ASCL1    | -     |
| hsa-miR-337-3p | ASMTL    | -        | ASMTL |
| hsa-miR-337-3p | ASRGL1   | ASRGL1   | -     |
| hsa-miR-337-3p | ASXL2    | ASXL2    | -     |
| hsa-miR-337-3p | ASZ1     | ASZ1     | -     |
| hsa-miR-337-3p | ATAD2B   | ATAD2B   | -     |
| hsa-miR-337-3p | ATG10    | ATG10    | -     |
| hsa-miR-337-3p | ATL2     | ATL2     | -     |

|                |         |         |         |
|----------------|---------|---------|---------|
| 3p             |         |         |         |
| hsa-miR-337-3p | ATMIN   | ATMIN   | -       |
| hsa-miR-337-3p | -       | ATP12A  | ATP12A  |
| hsa-miR-337-3p | -       | ATP13A4 | ATP13A4 |
| hsa-miR-337-3p | -       | ATP1B1  | ATP1B1  |
| hsa-miR-337-3p | ATP1B2  | ATP1B2  | -       |
| hsa-miR-337-3p | ATP2B1  | ATP2B1  | -       |
| hsa-miR-337-3p | ATP5F1  | ATP5F1  | -       |
| hsa-miR-337-3p | ATP5G3  | ATP5G3  | -       |
| hsa-miR-337-3p | ATP5J2  | ATP5J2  | -       |
| hsa-miR-337-3p | ATP6V1A | ATP6V1A | -       |
| hsa-miR-337-3p | ATP7A   | ATP7A   | -       |
| hsa-miR-337-3p | ATPAF1  | ATPAF1  | -       |
| hsa-miR-337-3p | ATPBD4  | ATPBD4  | -       |
| hsa-miR-337-3p | ATRNL1  | ATRNL1  | -       |
| hsa-miR-337-3p | ATXN1L  | ATXN1L  | -       |
| hsa-miR-337-3p | ATXN2   | ATXN2   | -       |
| hsa-miR-337-3p | AVPR1A  | AVPR1A  | -       |
| hsa-miR-337-3p | AZGP1   | -       | AZGP1   |
| hsa-miR-337-3p | B4GALT4 | B4GALT4 | -       |
| hsa-miR-337-3p | BAALC   | BAALC   | -       |
| hsa-miR-337-3p | BAG4    | BAG4    | -       |
| hsa-miR-337-3p | BBS9    | BBS9    | -       |
| hsa-miR-337-3p | BCHE    | BCHE    | -       |
| hsa-miR-337-3p | BCL11B  | BCL11B  | -       |
| hsa-miR-337-3p | BCL2L15 | BCL2L15 | -       |
| hsa-miR-337-3p | BCLAF1  | BCLAF1  | -       |
| hsa-miR-337-3p | BLZF1   | BLZF1   | -       |
| hsa-miR-337-3p | BRWD1   | BRWD1   | -       |

|                |           |           |           |
|----------------|-----------|-----------|-----------|
| 3p             |           |           |           |
| hsa-miR-337-3p | BTBD10    | BTBD10    | -         |
| hsa-miR-337-3p | BTBD7     | BTBD7     | -         |
| hsa-miR-337-3p | -         | BTBD8     | BTBD8     |
| hsa-miR-337-3p | BTN3A3    | BTN3A3    | -         |
| hsa-miR-337-3p | BVES      | BVES      | -         |
| hsa-miR-337-3p | -         | C10orf4   | C10orf4   |
| hsa-miR-337-3p | C10orf76  | -         | C10orf76  |
| hsa-miR-337-3p | C10orf81  | C10orf81  | -         |
| hsa-miR-337-3p | C12orf29  | C12orf29  | -         |
| hsa-miR-337-3p | -         | C12orf48  | C12orf48  |
| hsa-miR-337-3p | C14orf101 | C14orf101 | -         |
| hsa-miR-337-3p | C14orf129 | C14orf129 | -         |
| hsa-miR-337-3p | C15orf54  | C15orf54  | -         |
| hsa-miR-337-3p | C17orf99  | C17orf99  | -         |
| hsa-miR-337-3p | -         | C18orf56  | C18orf56  |
| hsa-miR-337-3p | -         | C1GALT1C1 | C1GALT1C1 |
| hsa-miR-337-3p | C1QL3     | C1QL3     | -         |
| hsa-miR-337-3p | C1QTNF3   | -         | C1QTNF3   |
| hsa-miR-337-3p | C1orf109  | C1orf109  | -         |
| hsa-miR-337-3p | -         | C1orf125  | C1orf125  |
| hsa-miR-337-3p | C1orf150  | C1orf150  | -         |
| hsa-miR-337-3p | C1orf173  | C1orf173  | -         |
| hsa-miR-337-3p | C1orf55   | C1orf55   | -         |
| hsa-miR-337-3p | -         | C20orf123 | C20orf123 |
| hsa-miR-337-3p | C21orf7   | C21orf7   | -         |
| hsa-miR-337-3p | C22orf25  | C22orf25  | -         |
| hsa-miR-337-3p | C22orf46  | C22orf46  | -         |
| hsa-miR-337-3p | C2CD2     | C2CD2     | -         |



|                |          |          |         |
|----------------|----------|----------|---------|
| 3p             |          |          |         |
| hsa-miR-337-3p | C3orf15  | C3orf15  | -       |
| hsa-miR-337-3p | C4orf46  | C4orf46  | -       |
| hsa-miR-337-3p | C5orf22  | C5orf22  | -       |
| hsa-miR-337-3p | C5orf24  | C5orf24  | -       |
| hsa-miR-337-3p | C5orf35  | C5orf35  | -       |
| hsa-miR-337-3p | C5orf41  | C5orf41  | -       |
| hsa-miR-337-3p | C5orf42  | C5orf42  | -       |
| hsa-miR-337-3p | C6orf201 | C6orf201 | -       |
| hsa-miR-337-3p | C7       | C7       | -       |
| hsa-miR-337-3p | -        | C7orf46  | C7orf46 |
| hsa-miR-337-3p | C7orf55  | C7orf55  | -       |
| hsa-miR-337-3p | C7orf63  | C7orf63  | -       |
| hsa-miR-337-3p | C8orf83  | C8orf83  | -       |
| hsa-miR-337-3p | C9orf152 | C9orf152 | -       |
| hsa-miR-337-3p | C9orf170 | C9orf170 | -       |
| hsa-miR-337-3p | C9orf5   | C9orf5   | -       |
| hsa-miR-337-3p | C9orf64  | C9orf64  | -       |
| hsa-miR-337-3p | C9orf72  | C9orf72  | -       |
| hsa-miR-337-3p | C9orf80  | C9orf80  | -       |
| hsa-miR-337-3p | CA13     | CA13     | -       |
| hsa-miR-337-3p | CACNB4   | CACNB4   | -       |
| hsa-miR-337-3p | CALCA    | -        | CALCA   |
| hsa-miR-337-3p | CALU     | CALU     | -       |
| hsa-miR-337-3p | CAMKK1   | -        | CAMKK1  |
| hsa-miR-337-3p | CAMSAP1  | CAMSAP1  | -       |
| hsa-miR-337-3p | CARD8    | CARD8    | -       |
| hsa-miR-337-3p | -        | CASD1    | CASD1   |
| hsa-miR-337-   | CASP3    | CASP3    | -       |

|                |          |          |       |
|----------------|----------|----------|-------|
| 3p             |          |          |       |
| hsa-miR-337-3p | CASS4    | CASS4    | -     |
| hsa-miR-337-3p | CAT      | CAT      | -     |
| hsa-miR-337-3p | CATSPER2 | CATSPER2 | -     |
| hsa-miR-337-3p | CBX6     | CBX6     | -     |
| hsa-miR-337-3p | CCBL2    | CCBL2    | -     |
| hsa-miR-337-3p | CCDC110  | CCDC110  | -     |
| hsa-miR-337-3p | CCDC122  | CCDC122  | -     |
| hsa-miR-337-3p | CCDC127  | CCDC127  | -     |
| hsa-miR-337-3p | CCDC47   | CCDC47   | -     |
| hsa-miR-337-3p | CCDC50   | CCDC50   | -     |
| hsa-miR-337-3p | CCDC68   | CCDC68   | -     |
| hsa-miR-337-3p | CCDC88A  | CCDC88A  | -     |
| hsa-miR-337-3p | CCDC91   | CCDC91   | -     |
| hsa-miR-337-3p | CCDC93   | CCDC93   | -     |
| hsa-miR-337-3p | CCDC99   | CCDC99   | -     |
| hsa-miR-337-3p | -        | CCL13    | CCL13 |
| hsa-miR-337-3p | CCNY     | CCNY     | -     |
| hsa-miR-337-3p | CCPG1    | CCPG1    | -     |
| hsa-miR-337-3p | CD109    | CD109    | -     |
| hsa-miR-337-3p | CD226    | CD226    | -     |
| hsa-miR-337-3p | CD28     | CD28     | -     |
| hsa-miR-337-3p | CD2AP    | CD2AP    | -     |
| hsa-miR-337-3p | CD302    | CD302    | -     |
| hsa-miR-337-3p | CD36     | CD36     | -     |
| hsa-miR-337-3p | CD82     | -        | CD82  |
| hsa-miR-337-3p | CD84     | CD84     | -     |
| hsa-miR-337-3p | CDC123   | CDC123   | -     |
| hsa-miR-337-3p | CDC73    | CDC73    | -     |

|                |         |         |        |
|----------------|---------|---------|--------|
| 3p             |         |         |        |
| hsa-miR-337-3p | CDCA4   | CDCA4   | -      |
| hsa-miR-337-3p | CDH9    | CDH9    | -      |
| hsa-miR-337-3p | CDK14   | CDK14   | -      |
| hsa-miR-337-3p | CDS1    | CDS1    | -      |
| hsa-miR-337-3p | CEBPG   | CEBPG   | -      |
| hsa-miR-337-3p | CECR2   | CECR2   | -      |
| hsa-miR-337-3p | CENPF   | -       | CENPF  |
| hsa-miR-337-3p | CENPN   | CENPN   | -      |
| hsa-miR-337-3p | CENPO   | CENPO   | -      |
| hsa-miR-337-3p | CENPQ   | CENPQ   | -      |
| hsa-miR-337-3p | CEP120  | CEP120  | -      |
| hsa-miR-337-3p | CEP135  | CEP135  | -      |
| hsa-miR-337-3p | CEP170  | CEP170  | -      |
| hsa-miR-337-3p | CEP63   | CEP63   | -      |
| hsa-miR-337-3p | CEP97   | CEP97   | -      |
| hsa-miR-337-3p | -       | CHAF1A  | CHAF1A |
| hsa-miR-337-3p | -       | CHD1L   | CHD1L  |
| hsa-miR-337-3p | CHIC1   | CHIC1   | -      |
| hsa-miR-337-3p | CHL1    | CHL1    | -      |
| hsa-miR-337-3p | CHM     | CHM     | -      |
| hsa-miR-337-3p | -       | CHMP5   | CHMP5  |
| hsa-miR-337-3p | CHORDC1 | CHORDC1 | -      |
| hsa-miR-337-3p | CHP     | CHP     | -      |
| hsa-miR-337-3p | CLDN1   | CLDN1   | -      |
| hsa-miR-337-3p | CLEC7A  | -       | CLEC7A |
| hsa-miR-337-3p | CLIC4   | CLIC4   | -      |
| hsa-miR-337-3p | CLIC5   | -       | CLIC5  |
| hsa-miR-337-   | CLRN1   | CLRN1   | -      |

|                |          |          |         |
|----------------|----------|----------|---------|
| 3p             |          |          |         |
| hsa-miR-337-3p | CMPK2    | CMPK2    | -       |
| hsa-miR-337-3p | CNGB3    | CNGB3    | -       |
| hsa-miR-337-3p | CNIH     | CNIH     | -       |
| hsa-miR-337-3p | CNN3     | CNN3     | -       |
| hsa-miR-337-3p | CNOT4    | CNOT4    | -       |
| hsa-miR-337-3p | CNOT6    | CNOT6    | -       |
| hsa-miR-337-3p | CNPY1    | CNPY1    | -       |
| hsa-miR-337-3p | CNR1     | CNR1     | -       |
| hsa-miR-337-3p | COIL     | COIL     | -       |
| hsa-miR-337-3p | -        | COL16A1  | COL16A1 |
| hsa-miR-337-3p | COL4A3BP | COL4A3BP | -       |
| hsa-miR-337-3p | COL4A4   | COL4A4   | -       |
| hsa-miR-337-3p | COL8A2   | COL8A2   | -       |
| hsa-miR-337-3p | COMMD3   | COMMD3   | -       |
| hsa-miR-337-3p | COMMD9   | COMMD9   | -       |
| hsa-miR-337-3p | CORO2A   | CORO2A   | -       |
| hsa-miR-337-3p | COX7A2L  | COX7A2L  | -       |
| hsa-miR-337-3p | CPD      | CPD      | -       |
| hsa-miR-337-3p | -        | CPE      | CPE     |
| hsa-miR-337-3p | CPEB3    | CPEB3    | -       |
| hsa-miR-337-3p | CPNE8    | CPNE8    | -       |
| hsa-miR-337-3p | CPVL     | CPVL     | -       |
| hsa-miR-337-3p | CREB1    | CREB1    | -       |
| hsa-miR-337-3p | CREB5    | CREB5    | -       |
| hsa-miR-337-3p | CRIP1    | CRIP1    | -       |
| hsa-miR-337-3p | CRLF3    | CRLF3    | -       |
| hsa-miR-337-3p | CSAD     | CSAD     | -       |
| hsa-miR-337-3p | CSF2RB   | CSF2RB   | -       |

|                |           |           |       |
|----------------|-----------|-----------|-------|
| 3p             |           |           |       |
| hsa-miR-337-3p | CSNK2A1   | CSNK2A1   | -     |
| hsa-miR-337-3p | -         | CST11     | CST11 |
| hsa-miR-337-3p | CTBS      | CTBS      | -     |
| hsa-miR-337-3p | CTNND2    | CTNND2    | -     |
| hsa-miR-337-3p | CTSS      | CTSS      | -     |
| hsa-miR-337-3p | CTTNBP2NL | CTTNBP2NL | -     |
| hsa-miR-337-3p | CUL2      | CUL2      | -     |
| hsa-miR-337-3p | CUL3      | CUL3      | -     |
| hsa-miR-337-3p | CUL5      | CUL5      | -     |
| hsa-miR-337-3p | CXCL1     | CXCL1     | -     |
| hsa-miR-337-3p | CXCL5     | CXCL5     | -     |
| hsa-miR-337-3p | CXCL6     | CXCL6     | -     |
| hsa-miR-337-3p | CXCR2     | CXCR2     | -     |
| hsa-miR-337-3p | CXorf21   | CXorf21   | -     |
| hsa-miR-337-3p | CYB561D1  | CYB561D1  | -     |
| hsa-miR-337-3p | CYB5D1    | CYB5D1    | -     |
| hsa-miR-337-3p | CYBRD1    | CYBRD1    | -     |
| hsa-miR-337-3p | CYP11B1   | CYP11B1   | -     |
| hsa-miR-337-3p | CYP1B1    | CYP1B1    | -     |
| hsa-miR-337-3p | CYP27C1   | CYP27C1   | -     |
| hsa-miR-337-3p | CYP2U1    | CYP2U1    | -     |
| hsa-miR-337-3p | CYP39A1   | CYP39A1   | -     |
| hsa-miR-337-3p | CYP3A7    | CYP3A7    | -     |
| hsa-miR-337-3p | CYP4F11   | CYP4F11   | -     |
| hsa-miR-337-3p | CYP51A1   | CYP51A1   | -     |
| hsa-miR-337-3p | DBX2      | DBX2      | -     |
| hsa-miR-337-3p | DCLK3     | DCLK3     | -     |
| hsa-miR-337-3p | DCP2      | DCP2      | -     |

|                |         |         |       |
|----------------|---------|---------|-------|
| 3p             |         |         |       |
| hsa-miR-337-3p | DDAH2   | DDAH2   | -     |
| hsa-miR-337-3p | DDX20   | DDX20   | -     |
| hsa-miR-337-3p | -       | DDX21   | DDX21 |
| hsa-miR-337-3p | DDX49   | -       | DDX49 |
| hsa-miR-337-3p | DEDD    | DEDD    | -     |
| hsa-miR-337-3p | DENND1B | DENND1B | -     |
| hsa-miR-337-3p | DGCR14  | DGCR14  | -     |
| hsa-miR-337-3p | DGKB    | DGKB    | -     |
| hsa-miR-337-3p | DGKI    | DGKI    | -     |
| hsa-miR-337-3p | DIRC1   | DIRC1   | -     |
| hsa-miR-337-3p | DISC1   | DISC1   | -     |
| hsa-miR-337-3p | DLC1    | DLC1    | -     |
| hsa-miR-337-3p | DLD     | DLD     | -     |
| hsa-miR-337-3p | DLX3    | DLX3    | -     |
| hsa-miR-337-3p | -       | DLX5    | DLX5  |
| hsa-miR-337-3p | DMXL1   | DMXL1   | -     |
| hsa-miR-337-3p | DNAH5   | DNAH5   | -     |
| hsa-miR-337-3p | DNAJB14 | DNAJB14 | -     |
| hsa-miR-337-3p | DNAJC10 | DNAJC10 | -     |
| hsa-miR-337-3p | DNAJC21 | DNAJC21 | -     |
| hsa-miR-337-3p | DNAJC5  | DNAJC5  | -     |
| hsa-miR-337-3p | DNAL1   | -       | DNAL1 |
| hsa-miR-337-3p | DNM3    | DNM3    | -     |
| hsa-miR-337-3p | DOCK3   | DOCK3   | -     |
| hsa-miR-337-3p | -       | DOCK9   | DOCK9 |
| hsa-miR-337-3p | DPP4    | DPP4    | -     |
| hsa-miR-337-3p | DPY19L1 | DPY19L1 | -     |
| hsa-miR-337-3p | DR1     | DR1     | -     |

|                |         |           |           |
|----------------|---------|-----------|-----------|
| 3p             |         |           |           |
| hsa-miR-337-3p | DSC3    | DSC3      | -         |
| hsa-miR-337-3p | DSPP    | DSPP      | -         |
| hsa-miR-337-3p | DTNA    | DTNA      | -         |
| hsa-miR-337-3p | DTWD1   | DTWD1     | -         |
| hsa-miR-337-3p | DUS4L   | DUS4L     | -         |
| hsa-miR-337-3p | DYNC2H1 | DYNC2H1   | -         |
| hsa-miR-337-3p | DYNLT3  | DYNLT3    | -         |
| hsa-miR-337-3p | E2F5    | E2F5      | -         |
| hsa-miR-337-3p | EAF1    | EAF1      | -         |
| hsa-miR-337-3p | EBF1    | EBF1      | -         |
| hsa-miR-337-3p | EBF3    | EBF3      | -         |
| hsa-miR-337-3p | -       | EBPL      | EBPL      |
| hsa-miR-337-3p | ECE2    | ECE2      | -         |
| hsa-miR-337-3p | EDAR    | EDAR      | -         |
| hsa-miR-337-3p | EDEM3   | EDEM3     | -         |
| hsa-miR-337-3p | EDNRA   | EDNRA     | -         |
| hsa-miR-337-3p | EEA1    | EEA1      | -         |
| hsa-miR-337-3p | -       | EEF1G     | EEF1G     |
| hsa-miR-337-3p | EIF2S1  | EIF2S1    | -         |
| hsa-miR-337-3p | EIF3J   | EIF3J     | -         |
| hsa-miR-337-3p | EIF4E   | EIF4E     | -         |
| hsa-miR-337-3p | -       | EIF4ENIF1 | EIF4ENIF1 |
| hsa-miR-337-3p | EIF5A2  | EIF5A2    | -         |
| hsa-miR-337-3p | ELMOD2  | ELMOD2    | -         |
| hsa-miR-337-3p | ELMOD3  | ELMOD3    | -         |
| hsa-miR-337-3p | ELTD1   | ELTD1     | -         |
| hsa-miR-337-3p | EML1    | EML1      | -         |
| hsa-miR-337-3p | EMR2    | EMR2      | -         |

|                |          |          |         |
|----------------|----------|----------|---------|
| 3p             |          |          |         |
| hsa-miR-337-3p | ENDOU    | ENDOU    | -       |
| hsa-miR-337-3p | ENPP4    | ENPP4    | -       |
| hsa-miR-337-3p | ENPP6    | ENPP6    | -       |
| hsa-miR-337-3p | ENSA     | -        | ENSA    |
| hsa-miR-337-3p | EPB41L1  | -        | EPB41L1 |
| hsa-miR-337-3p | EPB41L4B | EPB41L4B | -       |
| hsa-miR-337-3p | EPB41L5  | EPB41L5  | -       |
| hsa-miR-337-3p | EPC2     | EPC2     | -       |
| hsa-miR-337-3p | EPDR1    | EPDR1    | -       |
| hsa-miR-337-3p | EPN2     | EPN2     | -       |
| hsa-miR-337-3p | ERBB2IP  | ERBB2IP  | -       |
| hsa-miR-337-3p | ERBB4    | ERBB4    | -       |
| hsa-miR-337-3p | ERI2     | ERI2     | -       |
| hsa-miR-337-3p | ERO1L    | ERO1L    | -       |
| hsa-miR-337-3p | ESR1     | ESR1     | -       |
| hsa-miR-337-3p | ESRP2    | ESRP2    | -       |
| hsa-miR-337-3p | ESYT2    | ESYT2    | -       |
| hsa-miR-337-3p | ETAA1    | ETAA1    | -       |
| hsa-miR-337-3p | EXD1     | EXD1     | -       |
| hsa-miR-337-3p | EXOC5    | EXOC5    | -       |
| hsa-miR-337-3p | FABP2    | FABP2    | -       |
| hsa-miR-337-3p | FAM104A  | FAM104A  | -       |
| hsa-miR-337-3p | FAM114A2 | FAM114A2 | -       |
| hsa-miR-337-3p | FAM122B  | FAM122B  | -       |
| hsa-miR-337-3p | FAM122C  | FAM122C  | -       |
| hsa-miR-337-3p | FAM124A  | FAM124A  | -       |
| hsa-miR-337-3p | FAM126A  | FAM126A  | -       |
| hsa-miR-337-3p | FAM134B  | FAM134B  | -       |



|                |          |          |       |
|----------------|----------|----------|-------|
| 3p             |          |          |       |
| hsa-miR-337-3p | FAM155A  | FAM155A  | -     |
| hsa-miR-337-3p | FAM160B1 | FAM160B1 | -     |
| hsa-miR-337-3p | FAM164A  | FAM164A  | -     |
| hsa-miR-337-3p | FAM167A  | FAM167A  | -     |
| hsa-miR-337-3p | FAM175B  | FAM175B  | -     |
| hsa-miR-337-3p | FAM189A1 | FAM189A1 | -     |
| hsa-miR-337-3p | FAM190A  | FAM190A  | -     |
| hsa-miR-337-3p | FAM196A  | FAM196A  | -     |
| hsa-miR-337-3p | FAM38B   | FAM38B   | -     |
| hsa-miR-337-3p | FAM5B    | -        | FAM5B |
| hsa-miR-337-3p | FAM63B   | FAM63B   | -     |
| hsa-miR-337-3p | FAM73A   | FAM73A   | -     |
| hsa-miR-337-3p | FAM76B   | FAM76B   | -     |
| hsa-miR-337-3p | FAM82A2  | FAM82A2  | -     |
| hsa-miR-337-3p | FAM83A   | FAM83A   | -     |
| hsa-miR-337-3p | FANCI    | FANCI    | -     |
| hsa-miR-337-3p | FAR1     | FAR1     | -     |
| hsa-miR-337-3p | FBN2     | FBN2     | -     |
| hsa-miR-337-3p | FBXO28   | FBXO28   | -     |
| hsa-miR-337-3p | FBXO8    | FBXO8    | -     |
| hsa-miR-337-3p | FCHO2    | FCHO2    | -     |
| hsa-miR-337-3p | FDX1     | FDX1     | -     |
| hsa-miR-337-3p | FERMT2   | FERMT2   | -     |
| hsa-miR-337-3p | -        | FGB      | FGB   |
| hsa-miR-337-3p | FGF5     | FGF5     | -     |
| hsa-miR-337-3p | FGFR1OP2 | FGFR1OP2 | -     |
| hsa-miR-337-3p | FGFR2    | -        | FGFR2 |
| hsa-miR-337-   | -        | FHAD1    | FHAD1 |

|                |         |         |        |
|----------------|---------|---------|--------|
| 3p             |         |         |        |
| hsa-miR-337-3p | FKBP5   | FKBP5   | -      |
| hsa-miR-337-3p | FKBP7   | FKBP7   | -      |
| hsa-miR-337-3p | FKTN    | FKTN    | -      |
| hsa-miR-337-3p | FNBP1L  | FNBP1L  | -      |
| hsa-miR-337-3p | FNIP1   | FNIP1   | -      |
| hsa-miR-337-3p | FOSB    | FOSB    | -      |
| hsa-miR-337-3p | FRAT2   | FRAT2   | -      |
| hsa-miR-337-3p | FRG2    | FRG2    | -      |
| hsa-miR-337-3p | FRMD6   | FRMD6   | -      |
| hsa-miR-337-3p | FSD1L   | FSD1L   | -      |
| hsa-miR-337-3p | FXN     | FXN     | -      |
| hsa-miR-337-3p | FXR1    | FXR1    | -      |
| hsa-miR-337-3p | FZD6    | FZD6    | -      |
| hsa-miR-337-3p | GAB1    | GAB1    | -      |
| hsa-miR-337-3p | GABRA1  | GABRA1  | -      |
| hsa-miR-337-3p | GAD1    | GAD1    | -      |
| hsa-miR-337-3p | GALK2   | GALK2   | -      |
| hsa-miR-337-3p | GALNT3  | GALNT3  | -      |
| hsa-miR-337-3p | GALNT6  | -       | GALNT6 |
| hsa-miR-337-3p | GALNTL2 | GALNTL2 | -      |
| hsa-miR-337-3p | GAPVD1  | GAPVD1  | -      |
| hsa-miR-337-3p | GBP6    | GBP6    | -      |
| hsa-miR-337-3p | -       | GCG     | GCG    |
| hsa-miR-337-3p | GCNT1   | GCNT1   | -      |
| hsa-miR-337-3p | GDA     | GDA     | -      |
| hsa-miR-337-3p | GDAP1   | GDAP1   | -      |
| hsa-miR-337-3p | GDF9    | GDF9    | -      |
| hsa-miR-337-3p | GEN1    | GEN1    | -      |

|                |          |          |        |
|----------------|----------|----------|--------|
| 3p             |          |          |        |
| hsa-miR-337-3p | GFOD1    | GFOD1    | -      |
| hsa-miR-337-3p | GFPT1    | GFPT1    | -      |
| hsa-miR-337-3p | GIN1     | GIN1     | -      |
| hsa-miR-337-3p | GIT2     | GIT2     | -      |
| hsa-miR-337-3p | GJB2     | GJB2     | -      |
| hsa-miR-337-3p | GK       | GK       | -      |
| hsa-miR-337-3p | GLDN     | GLDN     | -      |
| hsa-miR-337-3p | GLYCTK   | GLYCTK   | -      |
| hsa-miR-337-3p | GMFB     | GMFB     | -      |
| hsa-miR-337-3p | GNAI3    | GNAI3    | -      |
| hsa-miR-337-3p | GNAO1    | GNAO1    | -      |
| hsa-miR-337-3p | GNAT1    | GNAT1    | -      |
| hsa-miR-337-3p | GNB4     | GNB4     | -      |
| hsa-miR-337-3p | GOLGA6L9 | GOLGA6L9 | -      |
| hsa-miR-337-3p | GOLGA7   | GOLGA7   | -      |
| hsa-miR-337-3p | GOLGB1   | GOLGB1   | -      |
| hsa-miR-337-3p | GOLPH3L  | GOLPH3L  | -      |
| hsa-miR-337-3p | -        | GON4L    | GON4L  |
| hsa-miR-337-3p | GOPC     | GOPC     | -      |
| hsa-miR-337-3p | GPAM     | GPAM     | -      |
| hsa-miR-337-3p | GPBP1L1  | GPBP1L1  | -      |
| hsa-miR-337-3p | GPC6     | GPC6     | -      |
| hsa-miR-337-3p | GPN1     | GPN1     | -      |
| hsa-miR-337-3p | GPR107   | GPR107   | -      |
| hsa-miR-337-3p | GPR173   | -        | GPR173 |
| hsa-miR-337-3p | GPR52    | GPR52    | -      |
| hsa-miR-337-3p | GPR63    | GPR63    | -      |
| hsa-miR-337-3p | GREM2    | GREM2    | -      |

|                |          |          |         |
|----------------|----------|----------|---------|
| 3p             |          |          |         |
| hsa-miR-337-3p | GRIA4    | GRIA4    | -       |
| hsa-miR-337-3p | GRIN2A   | GRIN2A   | -       |
| hsa-miR-337-3p | GRIN3A   | GRIN3A   | -       |
| hsa-miR-337-3p | GRIP1    | GRIP1    | -       |
| hsa-miR-337-3p | GSK3B    | GSK3B    | -       |
| hsa-miR-337-3p | GSPT1    | GSPT1    | -       |
| hsa-miR-337-3p | GSTCD    | GSTCD    | -       |
| hsa-miR-337-3p | -        | GTF2H3   | GTF2H3  |
| hsa-miR-337-3p | -        | GUCY1B3  | GUCY1B3 |
| hsa-miR-337-3p | HAPLN1   | HAPLN1   | -       |
| hsa-miR-337-3p | HCFC2    | HCFC2    | -       |
| hsa-miR-337-3p | HDAC2    | HDAC2    | -       |
| hsa-miR-337-3p | HDAC8    | HDAC8    | -       |
| hsa-miR-337-3p | HDAC9    | -        | HDAC9   |
| hsa-miR-337-3p | HECW2    | HECW2    | -       |
| hsa-miR-337-3p | HEMK1    | HEMK1    | -       |
| hsa-miR-337-3p | HERPUD2  | HERPUD2  | -       |
| hsa-miR-337-3p | HES5     | HES5     | -       |
| hsa-miR-337-3p | HIBADH   | HIBADH   | -       |
| hsa-miR-337-3p | HIPK2    | -        | HIPK2   |
| hsa-miR-337-3p | HIPK3    | -        | HIPK3   |
| hsa-miR-337-3p | HLA-DPB1 | HLA-DPB1 | -       |
| hsa-miR-337-3p | HLF      | HLF      | -       |
| hsa-miR-337-3p | HMCN1    | HMCN1    | -       |
| hsa-miR-337-3p | HMGA2    | HMGA2    | -       |
| hsa-miR-337-3p | HMGB3    | HMGB3    | -       |
| hsa-miR-337-3p | HMGXB4   | HMGXB4   | -       |
| hsa-miR-337-3p | -        | HN1L     | HN1L    |

|                |         |         |         |
|----------------|---------|---------|---------|
| 3p             |         |         |         |
| hsa-miR-337-3p | HNRNPA3 | HNRNPA3 | -       |
| hsa-miR-337-3p | HNRNPD  | HNRNPD  | -       |
| hsa-miR-337-3p | HNRNPR  | HNRNPR  | -       |
| hsa-miR-337-3p | HOXB2   | HOXB2   | -       |
| hsa-miR-337-3p | -       | HOXC4   | HOXC4   |
| hsa-miR-337-3p | HP1BP3  | HP1BP3  | -       |
| hsa-miR-337-3p | HPCAL4  | HPCAL4  | -       |
| hsa-miR-337-3p | HRASLS5 | HRASLS5 | -       |
| hsa-miR-337-3p | HRH4    | -       | HRH4    |
| hsa-miR-337-3p | HRNR    | HRNR    | -       |
| hsa-miR-337-3p | HRSP12  | HRSP12  | -       |
| hsa-miR-337-3p | HSD17B7 | -       | HSD17B7 |
| hsa-miR-337-3p | HSPA13  | HSPA13  | -       |
| hsa-miR-337-3p | HTRA2   | HTRA2   | -       |
| hsa-miR-337-3p | ICA1L   | ICA1L   | -       |
| hsa-miR-337-3p | ICK     | ICK     | -       |
| hsa-miR-337-3p | ICMT    | ICMT    | -       |
| hsa-miR-337-3p | IGF1    | IGF1    | -       |
| hsa-miR-337-3p | IGFBP4  | IGFBP4  | -       |
| hsa-miR-337-3p | IKBKAP  | IKBKAP  | -       |
| hsa-miR-337-3p | IL13RA1 | IL13RA1 | -       |
| hsa-miR-337-3p | IL17A   | IL17A   | -       |
| hsa-miR-337-3p | IL19    | IL19    | -       |
| hsa-miR-337-3p | IMPACT  | IMPACT  | -       |
| hsa-miR-337-3p | IMPG2   | -       | IMPG2   |
| hsa-miR-337-3p | INPP5D  | INPP5D  | -       |
| hsa-miR-337-3p | INSIG1  | INSIG1  | -       |
| hsa-miR-337-3p | INSIG2  | INSIG2  | -       |

|                |          |          |          |
|----------------|----------|----------|----------|
| 3p             |          |          |          |
| hsa-miR-337-3p | INSR     | INSR     | -        |
| hsa-miR-337-3p | INTS6    | INTS6    | -        |
| hsa-miR-337-3p | IPO8     | IPO8     | -        |
| hsa-miR-337-3p | IPP      | IPP      | -        |
| hsa-miR-337-3p | IQGAP1   | IQGAP1   | -        |
| hsa-miR-337-3p | IQUB     | IQUB     | -        |
| hsa-miR-337-3p | -        | IRAK1BP1 | IRAK1BP1 |
| hsa-miR-337-3p | IRAK3    | IRAK3    | -        |
| hsa-miR-337-3p | IRF4     | IRF4     | -        |
| hsa-miR-337-3p | ITGA4    | ITGA4    | -        |
| hsa-miR-337-3p | ITPR2    | ITPR2    | -        |
| hsa-miR-337-3p | JAK2     | JAK2     | -        |
| hsa-miR-337-3p | JAKMIP3  | JAKMIP3  | -        |
| hsa-miR-337-3p | JAZF1    | JAZF1    | -        |
| hsa-miR-337-3p | JDP2     | JDP2     | -        |
| hsa-miR-337-3p | KAT2B    | KAT2B    | -        |
| hsa-miR-337-3p | KBTBD11  | KBTBD11  | -        |
| hsa-miR-337-3p | KBTBD8   | KBTBD8   | -        |
| hsa-miR-337-3p | KCMF1    | -        | KCMF1    |
| hsa-miR-337-3p | KCND1    | KCND1    | -        |
| hsa-miR-337-3p | KCNG3    | KCNG3    | -        |
| hsa-miR-337-3p | KCNH4    | KCNH4    | -        |
| hsa-miR-337-3p | KCNJ2    | KCNJ2    | -        |
| hsa-miR-337-3p | KCNJ9    | KCNJ9    | -        |
| hsa-miR-337-3p | -        | KCNV2    | KCNV2    |
| hsa-miR-337-3p | KHDRBS2  | KHDRBS2  | -        |
| hsa-miR-337-3p | KIAA0040 | KIAA0040 | -        |
| hsa-miR-337-3p | KIAA0494 | KIAA0494 | -        |

|                |           |           |        |
|----------------|-----------|-----------|--------|
| 3p             |           |           |        |
| hsa-miR-337-3p | KIAA0564  | KIAA0564  | -      |
| hsa-miR-337-3p | KIAA0586  | KIAA0586  | -      |
| hsa-miR-337-3p | KIAA0895  | KIAA0895  | -      |
| hsa-miR-337-3p | KIAA0895L | KIAA0895L | -      |
| hsa-miR-337-3p | KIAA0907  | KIAA0907  | -      |
| hsa-miR-337-3p | KIAA1383  | KIAA1383  | -      |
| hsa-miR-337-3p | KIAA1468  | KIAA1468  | -      |
| hsa-miR-337-3p | KIAA1530  | KIAA1530  | -      |
| hsa-miR-337-3p | KIAA1549  | KIAA1549  | -      |
| hsa-miR-337-3p | KIAA1715  | KIAA1715  | -      |
| hsa-miR-337-3p | KIAA1826  | KIAA1826  | -      |
| hsa-miR-337-3p | KIF21B    | KIF21B    | -      |
| hsa-miR-337-3p | -         | KIF5B     | KIF5B  |
| hsa-miR-337-3p | KIF5C     | KIF5C     | -      |
| hsa-miR-337-3p | KLHDC4    | -         | KLHDC4 |
| hsa-miR-337-3p | KLHL14    | KLHL14    | -      |
| hsa-miR-337-3p | KLHL28    | KLHL28    | -      |
| hsa-miR-337-3p | KLHL32    | KLHL32    | -      |
| hsa-miR-337-3p | KLHL4     | KLHL4     | -      |
| hsa-miR-337-3p | KLHL5     | KLHL5     | -      |
| hsa-miR-337-3p | -         | KLK7      | KLK7   |
| hsa-miR-337-3p | KPNA1     | KPNA1     | -      |
| hsa-miR-337-3p | KRAS      | KRAS      | -      |
| hsa-miR-337-3p | LAMP2     | LAMP2     | -      |
| hsa-miR-337-3p | LARP1B    | LARP1B    | -      |
| hsa-miR-337-3p | LARP4     | LARP4     | -      |
| hsa-miR-337-3p | LARP4B    | LARP4B    | -      |
| hsa-miR-337-3p | LATS2     | LATS2     | -      |

|                |         |         |       |
|----------------|---------|---------|-------|
| 3p             |         |         |       |
| hsa-miR-337-3p | LAX1    | -       | LAX1  |
| hsa-miR-337-3p | LDLRAD1 | LDLRAD1 | -     |
| hsa-miR-337-3p | LDLRAD3 | LDLRAD3 | -     |
| hsa-miR-337-3p | LEMD3   | LEMD3   | -     |
| hsa-miR-337-3p | LEPR    | LEPR    | -     |
| hsa-miR-337-3p | LEPROT  | LEPROT  | -     |
| hsa-miR-337-3p | LHFPL3  | LHFPL3  | -     |
| hsa-miR-337-3p | LHFPL5  | LHFPL5  | -     |
| hsa-miR-337-3p | LIFR    | LIFR    | -     |
| hsa-miR-337-3p | LIG3    | -       | LIG3  |
| hsa-miR-337-3p | LIG4    | LIG4    | -     |
| hsa-miR-337-3p | LIN28B  | LIN28B  | -     |
| hsa-miR-337-3p | LIN52   | LIN52   | -     |
| hsa-miR-337-3p | LIN54   | LIN54   | -     |
| hsa-miR-337-3p | LMLN    | LMLN    | -     |
| hsa-miR-337-3p | LMO3    | LMO3    | -     |
| hsa-miR-337-3p | LMTK2   | LMTK2   | -     |
| hsa-miR-337-3p | LPAR1   | LPAR1   | -     |
| hsa-miR-337-3p | LPPR4   | LPPR4   | -     |
| hsa-miR-337-3p | LRCH2   | LRCH2   | -     |
| hsa-miR-337-3p | LRIG1   | LRIG1   | -     |
| hsa-miR-337-3p | LRIT3   | LRIT3   | -     |
| hsa-miR-337-3p | LRRC10  | LRRC10  | -     |
| hsa-miR-337-3p | LRRC19  | LRRC19  | -     |
| hsa-miR-337-3p | LRRC8B  | LRRC8B  | -     |
| hsa-miR-337-3p | LRRK2   | LRRK2   | -     |
| hsa-miR-337-3p | LSM14B  | LSM14B  | -     |
| hsa-miR-337-3p | LTB4R   | -       | LTB4R |



|                |          |          |       |
|----------------|----------|----------|-------|
| 3p             |          |          |       |
| hsa-miR-337-3p | LUZP2    | LUZP2    | -     |
| hsa-miR-337-3p | -        | LYRM1    | LYRM1 |
| hsa-miR-337-3p | -        | MAEA     | MAEA  |
| hsa-miR-337-3p | MAF      | MAF      | -     |
| hsa-miR-337-3p | MAL2     | MAL2     | -     |
| hsa-miR-337-3p | MAN1A1   | MAN1A1   | -     |
| hsa-miR-337-3p | MAP1LC3B | MAP1LC3B | -     |
| hsa-miR-337-3p | MAP7     | MAP7     | -     |
| hsa-miR-337-3p | MAPK6    | MAPK6    | -     |
| hsa-miR-337-3p | MATN2    | MATN2    | -     |
| hsa-miR-337-3p | MBOAT1   | MBOAT1   | -     |
| hsa-miR-337-3p | MCCD1    | MCCD1    | -     |
| hsa-miR-337-3p | MCL1     | MCL1     | -     |
| hsa-miR-337-3p | MCM8     | MCM8     | -     |
| hsa-miR-337-3p | MCM9     | MCM9     | -     |
| hsa-miR-337-3p | MDGA2    | MDGA2    | -     |
| hsa-miR-337-3p | MDM4     | -        | MDM4  |
| hsa-miR-337-3p | MED1     | MED1     | -     |
| hsa-miR-337-3p | MED13L   | MED13L   | -     |
| hsa-miR-337-3p | MED14    | MED14    | -     |
| hsa-miR-337-3p | MEF2C    | MEF2C    | -     |
| hsa-miR-337-3p | MEIS2    | MEIS2    | -     |
| hsa-miR-337-3p | MEST     | MEST     | -     |
| hsa-miR-337-3p | METTL2A  | METTL2A  | -     |
| hsa-miR-337-3p | METTL2B  | METTL2B  | -     |
| hsa-miR-337-3p | MEX3D    | MEX3D    | -     |
| hsa-miR-337-3p | MGAT3    | -        | MGAT3 |
| hsa-miR-337-3p | MGAT4A   | MGAT4A   | -     |

|                |         |         |        |
|----------------|---------|---------|--------|
| 3p             |         |         |        |
| hsa-miR-337-3p | MIB1    | MIB1    | -      |
| hsa-miR-337-3p | MINA    | MINA    | -      |
| hsa-miR-337-3p | MITF    | MITF    | -      |
| hsa-miR-337-3p | MKRN1   | MKRN1   | -      |
| hsa-miR-337-3p | MLEC    | MLEC    | -      |
| hsa-miR-337-3p | MLF1IP  | MLF1IP  | -      |
| hsa-miR-337-3p | MLH3    | -       | MLH3   |
| hsa-miR-337-3p | -       | MLLT10  | MLLT10 |
| hsa-miR-337-3p | MMAA    | MMAA    | -      |
| hsa-miR-337-3p | MME     | MME     | -      |
| hsa-miR-337-3p | MMGT1   | MMGT1   | -      |
| hsa-miR-337-3p | MMP16   | MMP16   | -      |
| hsa-miR-337-3p | MMP21   | MMP21   | -      |
| hsa-miR-337-3p | MOBKL1A | MOBKL1A | -      |
| hsa-miR-337-3p | MORC3   | MORC3   | -      |
| hsa-miR-337-3p | MOV10   | -       | MOV10  |
| hsa-miR-337-3p | MRE11A  | MRE11A  | -      |
| hsa-miR-337-3p | MRPS36  | MRPS36  | -      |
| hsa-miR-337-3p | MRS2    | MRS2    | -      |
| hsa-miR-337-3p | MS4A2   | MS4A2   | -      |
| hsa-miR-337-3p | MSH3    | MSH3    | -      |
| hsa-miR-337-3p | MSL1    | MSL1    | -      |
| hsa-miR-337-3p | -       | MSRA    | MSRA   |
| hsa-miR-337-3p | -       | MTCH2   | MTCH2  |
| hsa-miR-337-3p | MTF1    | MTF1    | -      |
| hsa-miR-337-3p | MTF2    | MTF2    | -      |
| hsa-miR-337-3p | MTFR1   | MTFR1   | -      |
| hsa-miR-337-3p | MTHFD2L | MTHFD2L | -      |

|                |          |          |         |
|----------------|----------|----------|---------|
| 3p             |          |          |         |
| hsa-miR-337-3p | MTPAP    | MTPAP    | -       |
| hsa-miR-337-3p | MTR      | MTR      | -       |
| hsa-miR-337-3p | MUC21    | MUC21    | -       |
| hsa-miR-337-3p | MYLIP    | MYLIP    | -       |
| hsa-miR-337-3p | MYO1B    | MYO1B    | -       |
| hsa-miR-337-3p | MYO1C    | MYO1C    | -       |
| hsa-miR-337-3p | MYO1E    | MYO1E    | -       |
| hsa-miR-337-3p | MYO6     | MYO6     | -       |
| hsa-miR-337-3p | N4BP2L1  | N4BP2L1  | -       |
| hsa-miR-337-3p | NAA16    | NAA16    | -       |
| hsa-miR-337-3p | NAA25    | NAA25    | -       |
| hsa-miR-337-3p | NAA38    | NAA38    | -       |
| hsa-miR-337-3p | NAA50    | NAA50    | -       |
| hsa-miR-337-3p | NAALADL2 | NAALADL2 | -       |
| hsa-miR-337-3p | NAB1     | NAB1     | -       |
| hsa-miR-337-3p | NAGPA    | NAGPA    | -       |
| hsa-miR-337-3p | NAPG     | NAPG     | -       |
| hsa-miR-337-3p | NARG2    | NARG2    | -       |
| hsa-miR-337-3p | NBN      | NBN      | -       |
| hsa-miR-337-3p | NBPF3    | NBPF3    | -       |
| hsa-miR-337-3p | NBR1     | NBR1     | -       |
| hsa-miR-337-3p | NCAM1    | NCAM1    | -       |
| hsa-miR-337-3p | NCOA7    | NCOA7    | -       |
| hsa-miR-337-3p | NDFIP2   | NDFIP2   | -       |
| hsa-miR-337-3p | NDUFA10  | -        | NDUFA10 |
| hsa-miR-337-3p | NDUFA4   | NDUFA4   | -       |
| hsa-miR-337-3p | NDUFB5   | NDUFB5   | -       |
| hsa-miR-337-3p | NEBL     | NEBL     | -       |

|                |        |        |       |
|----------------|--------|--------|-------|
| 3p             |        |        |       |
| hsa-miR-337-3p | NES    | -      | NES   |
| hsa-miR-337-3p | NETO1  | NETO1  | -     |
| hsa-miR-337-3p | NETO2  | NETO2  | -     |
| hsa-miR-337-3p | NF1    | NF1    | -     |
| hsa-miR-337-3p | NFATC3 | NFATC3 | -     |
| hsa-miR-337-3p | NFX1   | NFX1   | -     |
| hsa-miR-337-3p | NIPA1  | NIPA1  | -     |
| hsa-miR-337-3p | NLRP8  | -      | NLRP8 |
| hsa-miR-337-3p | NME1   | -      | NME1  |
| hsa-miR-337-3p | NOX4   | NOX4   | -     |
| hsa-miR-337-3p | NR2C1  | NR2C1  | -     |
| hsa-miR-337-3p | NR3C1  | NR3C1  | -     |
| hsa-miR-337-3p | NRAS   | NRAS   | -     |
| hsa-miR-337-3p | NSUN2  | NSUN2  | -     |
| hsa-miR-337-3p | -      | NSUN7  | NSUN7 |
| hsa-miR-337-3p | NTN5   | NTN5   | -     |
| hsa-miR-337-3p | NTNG1  | NTNG1  | -     |
| hsa-miR-337-3p | NTS    | NTS    | -     |
| hsa-miR-337-3p | NUDCD1 | NUDCD1 | -     |
| hsa-miR-337-3p | NUDCD2 | NUDCD2 | -     |
| hsa-miR-337-3p | NUDT12 | NUDT12 | -     |
| hsa-miR-337-3p | NUP50  | NUP50  | -     |
| hsa-miR-337-3p | NUS1   | NUS1   | -     |
| hsa-miR-337-3p | OCA2   | OCA2   | -     |
| hsa-miR-337-3p | OCIAD1 | OCIAD1 | -     |
| hsa-miR-337-3p | ODZ1   | ODZ1   | -     |
| hsa-miR-337-3p | OMD    | OMD    | -     |
| hsa-miR-337-3p | OPHN1  | -      | OPHN1 |

|                |          |          |        |
|----------------|----------|----------|--------|
| 3p             |          |          |        |
| hsa-miR-337-3p | OPN4     | OPN4     | -      |
| hsa-miR-337-3p | OR2C3    | OR2C3    | -      |
| hsa-miR-337-3p | OTUD7B   | OTUD7B   | -      |
| hsa-miR-337-3p | OXNAD1   | OXNAD1   | -      |
| hsa-miR-337-3p | P4HA1    | P4HA1    | -      |
| hsa-miR-337-3p | PAFAH1B2 | PAFAH1B2 | -      |
| hsa-miR-337-3p | PAFAH2   | PAFAH2   | -      |
| hsa-miR-337-3p | PAK7     | -        | PAK7   |
| hsa-miR-337-3p | PALLD    | -        | PALLD  |
| hsa-miR-337-3p | PALMD    | PALMD    | -      |
| hsa-miR-337-3p | PAN3     | PAN3     | -      |
| hsa-miR-337-3p | PANK1    | PANK1    | -      |
| hsa-miR-337-3p | PAPD5    | PAPD5    | -      |
| hsa-miR-337-3p | PAPOLB   | PAPOLB   | -      |
| hsa-miR-337-3p | PAPOLG   | PAPOLG   | -      |
| hsa-miR-337-3p | PARM1    | PARM1    | -      |
| hsa-miR-337-3p | PARP9    | PARP9    | -      |
| hsa-miR-337-3p | PAX3     | PAX3     | -      |
| hsa-miR-337-3p | PBOV1    | -        | PBOV1  |
| hsa-miR-337-3p | PBRM1    | PBRM1    | -      |
| hsa-miR-337-3p | PCDH11X  | PCDH11X  | -      |
| hsa-miR-337-3p | PCDH11Y  | PCDH11Y  | -      |
| hsa-miR-337-3p | PCDH15   | PCDH15   | -      |
| hsa-miR-337-3p | PCDH18   | PCDH18   | -      |
| hsa-miR-337-3p | PCDH19   | -        | PCDH19 |
| hsa-miR-337-3p | -        | PCDH9    | PCDH9  |
| hsa-miR-337-3p | PCDHA9   | PCDHA9   | -      |
| hsa-miR-337-3p | PCDHGB7  | PCDHGB7  | -      |

|                |         |         |        |
|----------------|---------|---------|--------|
| 3p             |         |         |        |
| hsa-miR-337-3p | PCLO    | PCLO    | -      |
| hsa-miR-337-3p | -       | PCMT1   | PCMT1  |
| hsa-miR-337-3p | PCMTD2  | PCMTD2  | -      |
| hsa-miR-337-3p | PCNX    | PCNX    | -      |
| hsa-miR-337-3p | PCP4L1  | -       | PCP4L1 |
| hsa-miR-337-3p | PCTP    | PCTP    | -      |
| hsa-miR-337-3p | PCYOX1  | PCYOX1  | -      |
| hsa-miR-337-3p | PDCD6   | PDCD6   | -      |
| hsa-miR-337-3p | PDE10A  | PDE10A  | -      |
| hsa-miR-337-3p | PDE11A  | -       | PDE11A |
| hsa-miR-337-3p | PDE3B   | PDE3B   | -      |
| hsa-miR-337-3p | PDE4DIP | PDE4DIP | -      |
| hsa-miR-337-3p | PDGFD   | PDGFD   | -      |
| hsa-miR-337-3p | PDIA3   | -       | PDIA3  |
| hsa-miR-337-3p | PDK1    | PDK1    | -      |
| hsa-miR-337-3p | PDK4    | PDK4    | -      |
| hsa-miR-337-3p | PDLIM5  | PDLIM5  | -      |
| hsa-miR-337-3p | PDP2    | PDP2    | -      |
| hsa-miR-337-3p | PDPK1   | PDPK1   | -      |
| hsa-miR-337-3p | PDSS2   | PDSS2   | -      |
| hsa-miR-337-3p | PDZK1   | PDZK1   | -      |
| hsa-miR-337-3p | PEA15   | -       | PEA15  |
| hsa-miR-337-3p | PEG3    | PEG3    | -      |
| hsa-miR-337-3p | PELO    | PELO    | -      |
| hsa-miR-337-3p | PEX13   | PEX13   | -      |
| hsa-miR-337-3p | PEX7    | -       | PEX7   |
| hsa-miR-337-3p | PFKFB2  | PFKFB2  | -      |
| hsa-miR-337-   | PFN2    | PFN2    | -      |

|                |         |         |        |
|----------------|---------|---------|--------|
| 3p             |         |         |        |
| hsa-miR-337-3p | PGM2    | -       | PGM2   |
| hsa-miR-337-3p | PGM2L1  | PGM2L1  | -      |
| hsa-miR-337-3p | PHC3    | PHC3    | -      |
| hsa-miR-337-3p | PHF20   | PHF20   | -      |
| hsa-miR-337-3p | PHF20L1 | PHF20L1 | -      |
| hsa-miR-337-3p | PHF3    | PHF3    | -      |
| hsa-miR-337-3p | PHKB    | -       | PHKB   |
| hsa-miR-337-3p | PHLDB2  | PHLDB2  | -      |
| hsa-miR-337-3p | PIGA    | PIGA    | -      |
| hsa-miR-337-3p | PIGK    | -       | PIGK   |
| hsa-miR-337-3p | PIGN    | PIGN    | -      |
| hsa-miR-337-3p | PIGS    | -       | PIGS   |
| hsa-miR-337-3p | PIK3C2B | PIK3C2B | -      |
| hsa-miR-337-3p | PIK3CA  | PIK3CA  | -      |
| hsa-miR-337-3p | PILRB   | PILRB   | -      |
| hsa-miR-337-3p | PIP4K2A | PIP4K2A | -      |
| hsa-miR-337-3p | PITPNB  | PITPNB  | -      |
| hsa-miR-337-3p | PJA2    | PJA2    | -      |
| hsa-miR-337-3p | PKD2    | PKD2    | -      |
| hsa-miR-337-3p | -       | PKD2L2  | PKD2L2 |
| hsa-miR-337-3p | PKHD1   | PKHD1   | -      |
| hsa-miR-337-3p | PKP4    | PKP4    | -      |
| hsa-miR-337-3p | PLAG1   | PLAG1   | -      |
| hsa-miR-337-3p | PLCB1   | PLCB1   | -      |
| hsa-miR-337-3p | PLCB4   | PLCB4   | -      |
| hsa-miR-337-3p | PLCH1   | PLCH1   | -      |
| hsa-miR-337-3p | PLCXD3  | PLCXD3  | -      |
| hsa-miR-337-3p | PLEKHG1 | PLEKHG1 | -      |

|                |          |          |        |
|----------------|----------|----------|--------|
| 3p             |          |          |        |
| hsa-miR-337-3p | PLIN2    | PLIN2    | -      |
| hsa-miR-337-3p | PLSCR4   | PLSCR4   | -      |
| hsa-miR-337-3p | PLXDC1   | PLXDC1   | -      |
| hsa-miR-337-3p | PLXNA4   | PLXNA4   | -      |
| hsa-miR-337-3p | -        | PMAIP1   | PMAIP1 |
| hsa-miR-337-3p | PML      | PML      | -      |
| hsa-miR-337-3p | PODXL    | PODXL    | -      |
| hsa-miR-337-3p | POGK     | POGK     | -      |
| hsa-miR-337-3p | POLD3    | POLD3    | -      |
| hsa-miR-337-3p | POLR1B   | POLR1B   | -      |
| hsa-miR-337-3p | -        | POLR3D   | POLR3D |
| hsa-miR-337-3p | POLR3H   | POLR3H   | -      |
| hsa-miR-337-3p | POU4F2   | POU4F2   | -      |
| hsa-miR-337-3p | PPARGC1A | PPARGC1A | -      |
| hsa-miR-337-3p | -        | PPCS     | PPCS   |
| hsa-miR-337-3p | PPIE     | PPIE     | -      |
| hsa-miR-337-3p | PPIL6    | PPIL6    | -      |
| hsa-miR-337-3p | PPIP5K2  | PPIP5K2  | -      |
| hsa-miR-337-3p | PPM1A    | PPM1A    | -      |
| hsa-miR-337-3p | PPM1F    | PPM1F    | -      |
| hsa-miR-337-3p | PPP1R3A  | PPP1R3A  | -      |
| hsa-miR-337-3p | PPP1R8   | PPP1R8   | -      |
| hsa-miR-337-3p | PPP1R9A  | PPP1R9A  | -      |
| hsa-miR-337-3p | PPP2R5C  | PPP2R5C  | -      |
| hsa-miR-337-3p | PPTC7    | PPTC7    | -      |
| hsa-miR-337-3p | PRDM2    | PRDM2    | -      |
| hsa-miR-337-3p | PRDX2    | -        | PRDX2  |
| hsa-miR-337-   | PRKAB2   | PRKAB2   | -      |



|                |         |         |        |
|----------------|---------|---------|--------|
| 3p             |         |         |        |
| hsa-miR-337-3p | -       | PROM1   | PROM1  |
| hsa-miR-337-3p | PROSC   | PROSC   | -      |
| hsa-miR-337-3p | PRPF4B  | PRPF4B  | -      |
| hsa-miR-337-3p | PRPS2   | PRPS2   | -      |
| hsa-miR-337-3p | PRR12   | PRR12   | -      |
| hsa-miR-337-3p | -       | PRR16   | PRR16  |
| hsa-miR-337-3p | PRTG    | -       | PRTG   |
| hsa-miR-337-3p | PSD2    | PSD2    | -      |
| hsa-miR-337-3p | PSG7    | PSG7    | -      |
| hsa-miR-337-3p | PTEN    | PTEN    | -      |
| hsa-miR-337-3p | PTGER3  | PTGER3  | -      |
| hsa-miR-337-3p | PTGFR   | PTGFR   | -      |
| hsa-miR-337-3p | PTH2R   | PTH2R   | -      |
| hsa-miR-337-3p | PTP4A1  | PTP4A1  | -      |
| hsa-miR-337-3p | -       | PTPN13  | PTPN13 |
| hsa-miR-337-3p | PTPN20A | PTPN20A | -      |
| hsa-miR-337-3p | PTPN20B | PTPN20B | -      |
| hsa-miR-337-3p | PTPRB   | PTPRB   | -      |
| hsa-miR-337-3p | PTPRD   | PTPRD   | -      |
| hsa-miR-337-3p | -       | PTPRK   | PTPRK  |
| hsa-miR-337-3p | PTPRN2  | PTPRN2  | -      |
| hsa-miR-337-3p | PTPRQ   | -       | PTPRQ  |
| hsa-miR-337-3p | -       | PUM1    | PUM1   |
| hsa-miR-337-3p | PVR     | -       | PVR    |
| hsa-miR-337-3p | PXMP4   | PXMP4   | -      |
| hsa-miR-337-3p | QKI     | QKI     | -      |
| hsa-miR-337-3p | QRSL1   | QRSL1   | -      |
| hsa-miR-337-3p | QTRTD1  | QTRTD1  | -      |

|                |          |         |          |
|----------------|----------|---------|----------|
| 3p             |          |         |          |
| hsa-miR-337-3p | RAB23    | RAB23   | -        |
| hsa-miR-337-3p | RAB27A   | RAB27A  | -        |
| hsa-miR-337-3p | RAB33B   | RAB33B  | -        |
| hsa-miR-337-3p | RAB39B   | RAB39B  | -        |
| hsa-miR-337-3p | RAB8B    | RAB8B   | -        |
| hsa-miR-337-3p | RAD23B   | -       | RAD23B   |
| hsa-miR-337-3p | RAPGEF2  | RAPGEF2 | -        |
| hsa-miR-337-3p | RASA1    | RASA1   | -        |
| hsa-miR-337-3p | RASA4    | RASA4   | -        |
| hsa-miR-337-3p | RASGEF1C | -       | RASGEF1C |
| hsa-miR-337-3p | RASSF1   | RASSF1  | -        |
| hsa-miR-337-3p | RASSF8   | RASSF8  | -        |
| hsa-miR-337-3p | RASSF9   | RASSF9  | -        |
| hsa-miR-337-3p | RBBP4    | RBBP4   | -        |
| hsa-miR-337-3p | RBBP5    | RBBP5   | -        |
| hsa-miR-337-3p | -        | RBBP7   | RBBP7    |
| hsa-miR-337-3p | RBM20    | RBM20   | -        |
| hsa-miR-337-3p | RBM3     | -       | RBM3     |
| hsa-miR-337-3p | RBMS3    | RBMS3   | -        |
| hsa-miR-337-3p | RBMX     | RBMX    | -        |
| hsa-miR-337-3p | RBPJ     | RBPJ    | -        |
| hsa-miR-337-3p | RDH10    | RDH10   | -        |
| hsa-miR-337-3p | REEP1    | REEP1   | -        |
| hsa-miR-337-3p | REL      | -       | REL      |
| hsa-miR-337-3p | RELL1    | RELL1   | -        |
| hsa-miR-337-3p | -        | RFC1    | RFC1     |
| hsa-miR-337-3p | RFC5     | RFC5    | -        |
| hsa-miR-337-3p | RFESD    | RFESD   | -        |

|                |         |         |        |
|----------------|---------|---------|--------|
| 3p             |         |         |        |
| hsa-miR-337-3p | RFK     | RFK     | -      |
| hsa-miR-337-3p | RFPL1   | -       | RFPL1  |
| hsa-miR-337-3p | RFPL3   | -       | RFPL3  |
| hsa-miR-337-3p | RFXAP   | RFXAP   | -      |
| hsa-miR-337-3p | RHOU    | RHOU    | -      |
| hsa-miR-337-3p | RIMBP2  | RIMBP2  | -      |
| hsa-miR-337-3p | RIMKLB  | RIMKLB  | -      |
| hsa-miR-337-3p | RIMS2   | RIMS2   | -      |
| hsa-miR-337-3p | RNASE7  | -       | RNASE7 |
| hsa-miR-337-3p | RND3    | RND3    | -      |
| hsa-miR-337-3p | RNF11   | RNF11   | -      |
| hsa-miR-337-3p | RNF111  | RNF111  | -      |
| hsa-miR-337-3p | RNF114  | RNF114  | -      |
| hsa-miR-337-3p | RNF125  | RNF125  | -      |
| hsa-miR-337-3p | RNF144B | RNF144B | -      |
| hsa-miR-337-3p | RNF145  | RNF145  | -      |
| hsa-miR-337-3p | RNF180  | RNF180  | -      |
| hsa-miR-337-3p | -       | RNF214  | RNF214 |
| hsa-miR-337-3p | RNF222  | RNF222  | -      |
| hsa-miR-337-3p | RNF24   | RNF24   | -      |
| hsa-miR-337-3p | RNF41   | RNF41   | -      |
| hsa-miR-337-3p | RPAIN   | RPAIN   | -      |
| hsa-miR-337-3p | RPE65   | RPE65   | -      |
| hsa-miR-337-3p | RPL22L1 | RPL22L1 | -      |
| hsa-miR-337-3p | RPN2    | -       | RPN2   |
| hsa-miR-337-3p | RPRD2   | RPRD2   | -      |
| hsa-miR-337-3p | -       | RPS3    | RPS3   |
| hsa-miR-337-3p | RPS6KA3 | RPS6KA3 | -      |

|                |         |         |        |
|----------------|---------|---------|--------|
| 3p             |         |         |        |
| hsa-miR-337-3p | RPS6KB1 | RPS6KB1 | -      |
| hsa-miR-337-3p | RPS6KC1 | RPS6KC1 | -      |
| hsa-miR-337-3p | RRAS2   | RRAS2   | -      |
| hsa-miR-337-3p | RRM2B   | RRM2B   | -      |
| hsa-miR-337-3p | RSBN1   | RSBN1   | -      |
| hsa-miR-337-3p | RTKN    | -       | RTKN   |
| hsa-miR-337-3p | RTKN2   | RTKN2   | -      |
| hsa-miR-337-3p | RUNDC3B | RUNDC3B | -      |
| hsa-miR-337-3p | SACM1L  | SACM1L  | -      |
| hsa-miR-337-3p | SAMD4A  | SAMD4A  | -      |
| hsa-miR-337-3p | SAP30L  | -       | SAP30L |
| hsa-miR-337-3p | SAR1A   | SAR1A   | -      |
| hsa-miR-337-3p | SAV1    | SAV1    | -      |
| hsa-miR-337-3p | SBF2    | SBF2    | -      |
| hsa-miR-337-3p | SCG3    | SCG3    | -      |
| hsa-miR-337-3p | SCIN    | SCIN    | -      |
| hsa-miR-337-3p | SCOC    | SCOC    | -      |
| hsa-miR-337-3p | SCTR    | -       | SCTR   |
| hsa-miR-337-3p | SCYL2   | -       | SCYL2  |
| hsa-miR-337-3p | SEC22A  | SEC22A  | -      |
| hsa-miR-337-3p | SEC24A  | SEC24A  | -      |
| hsa-miR-337-3p | SEC63   | SEC63   | -      |
| hsa-miR-337-3p | SELT    | SELT    | -      |
| hsa-miR-337-3p | SEMA3D  | SEMA3D  | -      |
| hsa-miR-337-3p | SEMA3E  | SEMA3E  | -      |
| hsa-miR-337-3p | SEMA4D  | SEMA4D  | -      |
| hsa-miR-337-3p | SENP1   | SENP1   | -      |
| hsa-miR-337-3p | SENP6   | SENP6   | -      |

|                |          |          |         |
|----------------|----------|----------|---------|
| 3p             |          |          |         |
| hsa-miR-337-3p | SEPHS1   | -        | SEPHS1  |
| hsa-miR-337-3p | SEPT6    | SEPT6    | -       |
| hsa-miR-337-3p | SEPW1    | SEPW1    | -       |
| hsa-miR-337-3p | SERF1B   | SERF1B   | -       |
| hsa-miR-337-3p | SERINC3  | SERINC3  | -       |
| hsa-miR-337-3p | SERPINE1 | SERPINE1 | -       |
| hsa-miR-337-3p | SERTAD2  | SERTAD2  | -       |
| hsa-miR-337-3p | SETD7    | SETD7    | -       |
| hsa-miR-337-3p | SFN      | -        | SFN     |
| hsa-miR-337-3p | SFPQ     | SFPQ     | -       |
| hsa-miR-337-3p | SFXN2    | SFXN2    | -       |
| hsa-miR-337-3p | SGPL1    | SGPL1    | -       |
| hsa-miR-337-3p | SGPP1    | SGPP1    | -       |
| hsa-miR-337-3p | SH3BGRL2 | SH3BGRL2 | -       |
| hsa-miR-337-3p | SH3BP4   | SH3BP4   | -       |
| hsa-miR-337-3p | SH3KBP1  | SH3KBP1  | -       |
| hsa-miR-337-3p | SHE      | SHE      | -       |
| hsa-miR-337-3p | SHISA3   | SHISA3   | -       |
| hsa-miR-337-3p | SHISA9   | SHISA9   | -       |
| hsa-miR-337-3p | SHOX2    | -        | SHOX2   |
| hsa-miR-337-3p | SHROOM3  | SHROOM3  | -       |
| hsa-miR-337-3p | SIN3A    | SIN3A    | -       |
| hsa-miR-337-3p | SIRT5    | -        | SIRT5   |
| hsa-miR-337-3p | SLAIN2   | SLAIN2   | -       |
| hsa-miR-337-3p | SLC16A1  | SLC16A1  | -       |
| hsa-miR-337-3p | SLC16A7  | -        | SLC16A7 |
| hsa-miR-337-3p | SLC17A8  | SLC17A8  | -       |
| hsa-miR-337-3p | SLC1A1   | SLC1A1   | -       |

|                |          |          |          |
|----------------|----------|----------|----------|
| 3p             |          |          |          |
| hsa-miR-337-3p | SLC1A7   | SLC1A7   | -        |
| hsa-miR-337-3p | SLC25A2  | SLC25A2  | -        |
| hsa-miR-337-3p | SLC25A20 | -        | SLC25A20 |
| hsa-miR-337-3p | SLC25A24 | SLC25A24 | -        |
| hsa-miR-337-3p | SLC27A3  | -        | SLC27A3  |
| hsa-miR-337-3p | SLC2A4RG | SLC2A4RG | -        |
| hsa-miR-337-3p | SLC30A5  | SLC30A5  | -        |
| hsa-miR-337-3p | -        | SLC35A1  | SLC35A1  |
| hsa-miR-337-3p | SLC35B1  | SLC35B1  | -        |
| hsa-miR-337-3p | SLC35F5  | SLC35F5  | -        |
| hsa-miR-337-3p | SLC38A4  | SLC38A4  | -        |
| hsa-miR-337-3p | -        | SLC39A8  | SLC39A8  |
| hsa-miR-337-3p | -        | SLC41A2  | SLC41A2  |
| hsa-miR-337-3p | SLC4A7   | SLC4A7   | -        |
| hsa-miR-337-3p | SLC5A12  | SLC5A12  | -        |
| hsa-miR-337-3p | SLC6A14  | SLC6A14  | -        |
| hsa-miR-337-3p | -        | SLC6A15  | SLC6A15  |
| hsa-miR-337-3p | SLC8A3   | SLC8A3   | -        |
| hsa-miR-337-3p | -        | SLC9A4   | SLC9A4   |
| hsa-miR-337-3p | SLCO3A1  | SLCO3A1  | -        |
| hsa-miR-337-3p | SLITRK5  | SLITRK5  | -        |
| hsa-miR-337-3p | SLITRK6  | SLITRK6  | -        |
| hsa-miR-337-3p | SMAD5    | SMAD5    | -        |
| hsa-miR-337-3p | SMAD7    | SMAD7    | -        |
| hsa-miR-337-3p | SMAD9    | -        | SMAD9    |
| hsa-miR-337-3p | -        | SMARCB1  | SMARCB1  |
| hsa-miR-337-3p | SMC1A    | SMC1A    | -        |
| hsa-miR-337-3p | SMC5     | SMC5     | -        |

|                |        |        |        |
|----------------|--------|--------|--------|
| 3p             |        |        |        |
| hsa-miR-337-3p | SMG7   | SMG7   | -      |
| hsa-miR-337-3p | SMS    | SMS    | -      |
| hsa-miR-337-3p | SNAP91 | SNAP91 | -      |
| hsa-miR-337-3p | SNIP1  | SNIP1  | -      |
| hsa-miR-337-3p | SNRPD1 | SNRPD1 | -      |
| hsa-miR-337-3p | SNTB2  | -      | SNTB2  |
| hsa-miR-337-3p | SNX16  | SNX16  | -      |
| hsa-miR-337-3p | SNX29  | SNX29  | -      |
| hsa-miR-337-3p | SORBS1 | SORBS1 | -      |
| hsa-miR-337-3p | SORCS1 | SORCS1 | -      |
| hsa-miR-337-3p | SORCS2 | SORCS2 | -      |
| hsa-miR-337-3p | SORCS3 | SORCS3 | -      |
| hsa-miR-337-3p | SORL1  | SORL1  | -      |
| hsa-miR-337-3p | SOS1   | SOS1   | -      |
| hsa-miR-337-3p | SOS2   | SOS2   | -      |
| hsa-miR-337-3p | -      | SOX30  | SOX30  |
| hsa-miR-337-3p | SOX5   | SOX5   | -      |
| hsa-miR-337-3p | SP1    | SP1    | -      |
| hsa-miR-337-3p | SP100  | SP100  | -      |
| hsa-miR-337-3p | SP4    | SP4    | -      |
| hsa-miR-337-3p | -      | SPAG16 | SPAG16 |
| hsa-miR-337-3p | SPAST  | SPAST  | -      |
| hsa-miR-337-3p | SPON1  | -      | SPON1  |
| hsa-miR-337-3p | SPRED1 | SPRED1 | -      |
| hsa-miR-337-3p | SPRED2 | SPRED2 | -      |
| hsa-miR-337-3p | SPTBN1 | SPTBN1 | -      |
| hsa-miR-337-3p | SRFBP1 | SRFBP1 | -      |
| hsa-miR-337-   | -      | SRP14  | SRP14  |

|                |          |          |        |
|----------------|----------|----------|--------|
| 3p             |          |          |        |
| hsa-miR-337-3p | SRP72    | SRP72    | -      |
| hsa-miR-337-3p | -        | SS18L1   | SS18L1 |
| hsa-miR-337-3p | SSBP2    | SSBP2    | -      |
| hsa-miR-337-3p | SSPN     | SSPN     | -      |
| hsa-miR-337-3p | SSX2IP   | SSX2IP   | -      |
| hsa-miR-337-3p | ST13     | ST13     | -      |
| hsa-miR-337-3p | STAM     | STAM     | -      |
| hsa-miR-337-3p | STAM2    | STAM2    | -      |
| hsa-miR-337-3p | STAT3    | STAT3    | -      |
| hsa-miR-337-3p | STEAP4   | STEAP4   | -      |
| hsa-miR-337-3p | STK3     | STK3     | -      |
| hsa-miR-337-3p | STK38L   | STK38L   | -      |
| hsa-miR-337-3p | STOX2    | STOX2    | -      |
| hsa-miR-337-3p | STX6     | STX6     | -      |
| hsa-miR-337-3p | STXBP5   | STXBP5   | -      |
| hsa-miR-337-3p | STXBP5L  | STXBP5L  | -      |
| hsa-miR-337-3p | STYX     | STYX     | -      |
| hsa-miR-337-3p | SUB1     | SUB1     | -      |
| hsa-miR-337-3p | -        | SUCLA2   | SUCLA2 |
| hsa-miR-337-3p | SURF6    | SURF6    | -      |
| hsa-miR-337-3p | SUV39H2  | SUV39H2  | -      |
| hsa-miR-337-3p | SUV420H1 | SUV420H1 | -      |
| hsa-miR-337-3p | SUZ12    | SUZ12    | -      |
| hsa-miR-337-3p | -        | SV2B     | SV2B   |
| hsa-miR-337-3p | SVOP     | SVOP     | -      |
| hsa-miR-337-3p | SWAP70   | SWAP70   | -      |
| hsa-miR-337-3p | SYN2     | SYN2     | -      |
| hsa-miR-337-   | SYNCRIP  | SYNCRIP  | -      |



|                |         |         |       |
|----------------|---------|---------|-------|
| 3p             |         |         |       |
| hsa-miR-337-3p | SYNPO   | SYNPO   | -     |
| hsa-miR-337-3p | SYNPR   | SYNPR   | -     |
| hsa-miR-337-3p | SYNRG   | SYNRG   | -     |
| hsa-miR-337-3p | SYT1    | SYT1    | -     |
| hsa-miR-337-3p | SYT4    | SYT4    | -     |
| hsa-miR-337-3p | TACC1   | TACC1   | -     |
| hsa-miR-337-3p | -       | TAF4    | TAF4  |
| hsa-miR-337-3p | TAF9B   | TAF9B   | -     |
| hsa-miR-337-3p | TANC1   | TANC1   | -     |
| hsa-miR-337-3p | TBC1D1  | TBC1D1  | -     |
| hsa-miR-337-3p | TBC1D26 | TBC1D26 | -     |
| hsa-miR-337-3p | TBC1D30 | TBC1D30 | -     |
| hsa-miR-337-3p | TBX5    | TBX5    | -     |
| hsa-miR-337-3p | TCF12   | TCF12   | -     |
| hsa-miR-337-3p | TCF21   | TCF21   | -     |
| hsa-miR-337-3p | TCF4    | TCF4    | -     |
| hsa-miR-337-3p | -       | TCFL5   | TCFL5 |
| hsa-miR-337-3p | TCTN3   | TCTN3   | -     |
| hsa-miR-337-3p | TDRD9   | TDRD9   | -     |
| hsa-miR-337-3p | TEAD1   | TEAD1   | -     |
| hsa-miR-337-3p | TEC     | TEC     | -     |
| hsa-miR-337-3p | TET2    | TET2    | -     |
| hsa-miR-337-3p | TET3    | TET3    | -     |
| hsa-miR-337-3p | TEX15   | TEX15   | -     |
| hsa-miR-337-3p | TFAP2A  | TFAP2A  | -     |
| hsa-miR-337-3p | TFB1M   | -       | TFB1M |
| hsa-miR-337-3p | TFE3    | TFE3    | -     |
| hsa-miR-337-   | -       | TGDS    | TGDS  |

|                |           |           |       |
|----------------|-----------|-----------|-------|
| 3p             |           |           |       |
| hsa-miR-337-3p | TGFBR2    | TGFBR2    | -     |
| hsa-miR-337-3p | TGFBR3    | TGFBR3    | -     |
| hsa-miR-337-3p | -         | TGS1      | TGS1  |
| hsa-miR-337-3p | THAP2     | THAP2     | -     |
| hsa-miR-337-3p | THAP6     | THAP6     | -     |
| hsa-miR-337-3p | THEM4     | THEM4     | -     |
| hsa-miR-337-3p | THEMIS    | THEMIS    | -     |
| hsa-miR-337-3p | THSD4     | THSD4     | -     |
| hsa-miR-337-3p | THSD7A    | THSD7A    | -     |
| hsa-miR-337-3p | THUMPD3   | THUMPD3   | -     |
| hsa-miR-337-3p | TIAL1     | TIAL1     | -     |
| hsa-miR-337-3p | TIPRL     | TIPRL     | -     |
| hsa-miR-337-3p | TJP1      | TJP1      | -     |
| hsa-miR-337-3p | TKTL2     | TKTL2     | -     |
| hsa-miR-337-3p | TMEM106B  | TMEM106B  | -     |
| hsa-miR-337-3p | TMEM107   | TMEM107   | -     |
| hsa-miR-337-3p | TMEM135   | TMEM135   | -     |
| hsa-miR-337-3p | TMEM170B  | TMEM170B  | -     |
| hsa-miR-337-3p | TMEM192   | TMEM192   | -     |
| hsa-miR-337-3p | TMEM215   | TMEM215   | -     |
| hsa-miR-337-3p | TMEM232   | TMEM232   | -     |
| hsa-miR-337-3p | TMEM33    | TMEM33    | -     |
| hsa-miR-337-3p | TMEM47    | TMEM47    | -     |
| hsa-miR-337-3p | TMEM59    | TMEM59    | -     |
| hsa-miR-337-3p | TMF1      | TMF1      | -     |
| hsa-miR-337-3p | TMOD1     | TMOD1     | -     |
| hsa-miR-337-3p | TMOD3     | -         | TMOD3 |
| hsa-miR-337-   | TMPRSS11B | TMPRSS11B | -     |

|                |          |          |         |
|----------------|----------|----------|---------|
| 3p             |          |          |         |
| hsa-miR-337-3p | TMTC1    | TMTC1    | -       |
| hsa-miR-337-3p | TMUB2    | TMUB2    | -       |
| hsa-miR-337-3p | TNF      | -        | TNF     |
| hsa-miR-337-3p | TNFSF11  | -        | TNFSF11 |
| hsa-miR-337-3p | TNKS     | TNKS     | -       |
| hsa-miR-337-3p | TNS3     | TNS3     | -       |
| hsa-miR-337-3p | TOP1     | TOP1     | -       |
| hsa-miR-337-3p | TOR1AIP1 | TOR1AIP1 | -       |
| hsa-miR-337-3p | TOR1AIP2 | TOR1AIP2 | -       |
| hsa-miR-337-3p | TOR1B    | TOR1B    | -       |
| hsa-miR-337-3p | TOR3A    | -        | TOR3A   |
| hsa-miR-337-3p | TOX4     | TOX4     | -       |
| hsa-miR-337-3p | TPMT     | TPMT     | -       |
| hsa-miR-337-3p | TPP2     | TPP2     | -       |
| hsa-miR-337-3p | TPR      | TPR      | -       |
| hsa-miR-337-3p | TRAK1    | TRAK1    | -       |
| hsa-miR-337-3p | TRAK2    | TRAK2    | -       |
| hsa-miR-337-3p | TRAT1    | TRAT1    | -       |
| hsa-miR-337-3p | TRIM14   | TRIM14   | -       |
| hsa-miR-337-3p | TRIM2    | TRIM2    | -       |
| hsa-miR-337-3p | TRIM33   | TRIM33   | -       |
| hsa-miR-337-3p | TRIT1    | -        | TRIT1   |
| hsa-miR-337-3p | TSGA14   | TSGA14   | -       |
| hsa-miR-337-3p | TSHR     | -        | TSHR    |
| hsa-miR-337-3p | TSPAN12  | TSPAN12  | -       |
| hsa-miR-337-3p | TSPAN3   | TSPAN3   | -       |
| hsa-miR-337-3p | TTC13    | TTC13    | -       |
| hsa-miR-337-3p | TTC18    | TTC18    | -       |

|                |          |          |        |
|----------------|----------|----------|--------|
| 3p             |          |          |        |
| hsa-miR-337-3p | -        | TTC23    | TTC23  |
| hsa-miR-337-3p | -        | TTN      | TTN    |
| hsa-miR-337-3p | TUFT1    | TUFT1    | -      |
| hsa-miR-337-3p | TYW3     | TYW3     | -      |
| hsa-miR-337-3p | UACA     | UACA     | -      |
| hsa-miR-337-3p | UAP1     | UAP1     | -      |
| hsa-miR-337-3p | UBA5     | UBA5     | -      |
| hsa-miR-337-3p | UBA6     | UBA6     | -      |
| hsa-miR-337-3p | UBASH3B  | UBASH3B  | -      |
| hsa-miR-337-3p | -        | UBE2C    | UBE2C  |
| hsa-miR-337-3p | UBE2D1   | UBE2D1   | -      |
| hsa-miR-337-3p | UBE2D2   | UBE2D2   | -      |
| hsa-miR-337-3p | UBE2E1   | -        | UBE2E1 |
| hsa-miR-337-3p | UBE2J1   | UBE2J1   | -      |
| hsa-miR-337-3p | UBE2Q2   | UBE2Q2   | -      |
| hsa-miR-337-3p | UBE2W    | UBE2W    | -      |
| hsa-miR-337-3p | UBE3C    | UBE3C    | -      |
| hsa-miR-337-3p | UBN1     | UBN1     | -      |
| hsa-miR-337-3p | UBN2     | UBN2     | -      |
| hsa-miR-337-3p | UBXN7    | UBXN7    | -      |
| hsa-miR-337-3p | UHRF1BP1 | UHRF1BP1 | -      |
| hsa-miR-337-3p | UMPS     | UMPS     | -      |
| hsa-miR-337-3p | UNC5D    | UNC5D    | -      |
| hsa-miR-337-3p | UNC80    | UNC80    | -      |
| hsa-miR-337-3p | UPK1B    | UPK1B    | -      |
| hsa-miR-337-3p | UQCRC2   | UQCRC2   | -      |
| hsa-miR-337-3p | URM1     | URM1     | -      |
| hsa-miR-337-3p | USH2A    | USH2A    | -      |

|                |        |        |        |
|----------------|--------|--------|--------|
| 3p             |        |        |        |
| hsa-miR-337-3p | USP31  | USP31  | -      |
| hsa-miR-337-3p | USP37  | USP37  | -      |
| hsa-miR-337-3p | USP45  | USP45  | -      |
| hsa-miR-337-3p | USP8   | USP8   | -      |
| hsa-miR-337-3p | VANGL2 | VANGL2 | -      |
| hsa-miR-337-3p | VAPA   | VAPA   | -      |
| hsa-miR-337-3p | VBP1   | VBP1   | -      |
| hsa-miR-337-3p | VEPH1  | -      | VEPH1  |
| hsa-miR-337-3p | VHL    | VHL    | -      |
| hsa-miR-337-3p | VLDLR  | VLDLR  | -      |
| hsa-miR-337-3p | VPS13A | VPS13A | -      |
| hsa-miR-337-3p | VPS13C | VPS13C | -      |
| hsa-miR-337-3p | VPS13D | VPS13D | -      |
| hsa-miR-337-3p | WBP2NL | WBP2NL | -      |
| hsa-miR-337-3p | WDR26  | WDR26  | -      |
| hsa-miR-337-3p | -      | WDR63  | WDR63  |
| hsa-miR-337-3p | WDR73  | -      | WDR73  |
| hsa-miR-337-3p | WNK1   | WNK1   | -      |
| hsa-miR-337-3p | WWC1   | WWC1   | -      |
| hsa-miR-337-3p | XPA    | XPA    | -      |
| hsa-miR-337-3p | YAF2   | YAF2   | -      |
| hsa-miR-337-3p | YAP1   | YAP1   | -      |
| hsa-miR-337-3p | YEATS2 | -      | YEATS2 |
| hsa-miR-337-3p | YEATS4 | -      | YEATS4 |
| hsa-miR-337-3p | YIPF6  | -      | YIPF6  |
| hsa-miR-337-3p | YME1L1 | YME1L1 | -      |
| hsa-miR-337-3p | YTHDC1 | YTHDC1 | -      |
| hsa-miR-337-3p | YTHDF2 | YTHDF2 | -      |

|                |         |         |         |
|----------------|---------|---------|---------|
| 3p             |         |         |         |
| hsa-miR-337-3p | ZAK     | ZAK     | -       |
| hsa-miR-337-3p | ZBTB2   | ZBTB2   | -       |
| hsa-miR-337-3p | ZBTB40  | ZBTB40  | -       |
| hsa-miR-337-3p | ZC3H12C | ZC3H12C | -       |
| hsa-miR-337-3p | ZCCHC10 | ZCCHC10 | -       |
| hsa-miR-337-3p | ZCCHC2  | ZCCHC2  | -       |
| hsa-miR-337-3p | ZCCHC4  | ZCCHC4  | -       |
| hsa-miR-337-3p | ZDHHC15 | ZDHHC15 | -       |
| hsa-miR-337-3p | ZDHHC2  | ZDHHC2  | -       |
| hsa-miR-337-3p | ZDHHC21 | ZDHHC21 | -       |
| hsa-miR-337-3p | ZDHHC22 | ZDHHC22 | -       |
| hsa-miR-337-3p | ZDHHC23 | ZDHHC23 | -       |
| hsa-miR-337-3p | ZFHX4   | ZFHX4   | -       |
| hsa-miR-337-3p | ZFP14   | ZFP14   | -       |
| hsa-miR-337-3p | ZFP30   | ZFP30   | -       |
| hsa-miR-337-3p | ZFX     | ZFX     | -       |
| hsa-miR-337-3p | ZFY     | ZFY     | -       |
| hsa-miR-337-3p | ZFYVE26 | ZFYVE26 | -       |
| hsa-miR-337-3p | -       | ZFYVE27 | ZFYVE27 |
| hsa-miR-337-3p | ZMAT4   | ZMAT4   | -       |
| hsa-miR-337-3p | ZMYM5   | -       | ZMYM5   |
| hsa-miR-337-3p | ZNF107  | ZNF107  | -       |
| hsa-miR-337-3p | ZNF12   | ZNF12   | -       |
| hsa-miR-337-3p | ZNF135  | -       | ZNF135  |
| hsa-miR-337-3p | ZNF146  | ZNF146  | -       |
| hsa-miR-337-3p | ZNF148  | ZNF148  | -       |
| hsa-miR-337-3p | ZNF154  | ZNF154  | -       |
| hsa-miR-337-3p | ZNF200  | ZNF200  | -       |

|                |         |         |         |
|----------------|---------|---------|---------|
| 3p             |         |         |         |
| hsa-miR-337-3p | ZNF214  | ZNF214  | -       |
| hsa-miR-337-3p | ZNF304  | ZNF304  | -       |
| hsa-miR-337-3p | ZNF326  | ZNF326  | -       |
| hsa-miR-337-3p | ZNF331  | ZNF331  | -       |
| hsa-miR-337-3p | ZNF33A  | ZNF33A  | -       |
| hsa-miR-337-3p | ZNF33B  | ZNF33B  | -       |
| hsa-miR-337-3p | ZNF346  | ZNF346  | -       |
| hsa-miR-337-3p | -       | ZNF347  | ZNF347  |
| hsa-miR-337-3p | ZNF362  | ZNF362  | -       |
| hsa-miR-337-3p | ZNF37A  | ZNF37A  | -       |
| hsa-miR-337-3p | ZNF440  | ZNF440  | -       |
| hsa-miR-337-3p | ZNF441  | ZNF441  | -       |
| hsa-miR-337-3p | -       | ZNF449  | ZNF449  |
| hsa-miR-337-3p | -       | ZNF487  | ZNF487  |
| hsa-miR-337-3p | ZNF518A | ZNF518A | -       |
| hsa-miR-337-3p | ZNF527  | ZNF527  | -       |
| hsa-miR-337-3p | ZNF585B | -       | ZNF585B |
| hsa-miR-337-3p | ZNF624  | ZNF624  | -       |
| hsa-miR-337-3p | ZNF626  | ZNF626  | -       |
| hsa-miR-337-3p | ZNF660  | ZNF660  | -       |
| hsa-miR-337-3p | ZNF662  | ZNF662  | -       |
| hsa-miR-337-3p | ZNF680  | ZNF680  | -       |
| hsa-miR-337-3p | ZNF682  | ZNF682  | -       |
| hsa-miR-337-3p | ZNF701  | -       | ZNF701  |
| hsa-miR-337-3p | ZNF713  | -       | ZNF713  |
| hsa-miR-337-3p | ZNF75D  | ZNF75D  | -       |
| hsa-miR-337-3p | ZNF761  | ZNF761  | -       |
| hsa-miR-337-3p | ZNF765  | ZNF765  | -       |

|                |        |         |         |
|----------------|--------|---------|---------|
| 3p             |        |         |         |
| hsa-miR-337-3p | ZNF770 | ZNF770  | -       |
| hsa-miR-337-3p | ZNF773 | ZNF773  | -       |
| hsa-miR-337-3p | ZNF781 | ZNF781  | -       |
| hsa-miR-337-3p | -      | ZNF790  | ZNF790  |
| hsa-miR-337-3p | ZNF791 | -       | ZNF791  |
| hsa-miR-337-3p | ZNF81  | ZNF81   | -       |
| hsa-miR-337-3p | ZNF831 | ZNF831  | -       |
| hsa-miR-337-3p | ZNRF2  | ZNRF2   | -       |
| hsa-miR-337-3p | ZWILCH | ZWILCH  | -       |
| hsa-miR-342-3p | -      | AAMP    | AAMP    |
| hsa-miR-342-3p | -      | ABCB4   | ABCB4   |
| hsa-miR-342-3p | -      | ACVRL1  | ACVRL1  |
| hsa-miR-342-3p | -      | ADI1    | ADI1    |
| hsa-miR-342-3p | -      | ADRA1A  | ADRA1A  |
| hsa-miR-342-3p | -      | AFP     | AFP     |
| hsa-miR-342-3p | -      | AKNA    | AKNA    |
| hsa-miR-342-3p | -      | ALKBH6  | ALKBH6  |
| hsa-miR-342-3p | -      | ANGPTL2 | ANGPTL2 |
| hsa-miR-342-3p | -      | ANKMY1  | ANKMY1  |
| hsa-miR-342-3p | -      | ANKRD49 | ANKRD49 |
| hsa-miR-342-3p | -      | ANXA8   | ANXA8   |
| hsa-miR-342-3p | -      | ANXA8L1 | ANXA8L1 |
| hsa-miR-342-3p | -      | ANXA8L2 | ANXA8L2 |
| hsa-miR-342-3p | -      | AP1M2   | AP1M2   |
| hsa-miR-342-3p | -      | AP2M1   | AP2M1   |
| hsa-miR-342-3p | -      | APH1A   | APH1A   |
| hsa-miR-342-3p | -      | AQP12B  | AQP12B  |
| hsa-miR-342-3p | -      | ARAF    | ARAF    |



|                |   |           |           |
|----------------|---|-----------|-----------|
| 3p             |   |           |           |
| hsa-miR-342-3p | - | ARHGAP21  | ARHGAP21  |
| hsa-miR-342-3p | - | ARID1B    | ARID1B    |
| hsa-miR-342-3p | - | ARMC8     | ARMC8     |
| hsa-miR-342-3p | - | ARVCF     | ARVCF     |
| hsa-miR-342-3p | - | ASB4      | ASB4      |
| hsa-miR-342-3p | - | ATP6V0B   | ATP6V0B   |
| hsa-miR-342-3p | - | ATP6V1G3  | ATP6V1G3  |
| hsa-miR-342-3p | - | ATXN2L    | ATXN2L    |
| hsa-miR-342-3p | - | B4GALNT2  | B4GALNT2  |
| hsa-miR-342-3p | - | BCL2L1    | BCL2L1    |
| hsa-miR-342-3p | - | BCL2L10   | BCL2L10   |
| hsa-miR-342-3p | - | BLZF1     | BLZF1     |
| hsa-miR-342-3p | - | BNC1      | BNC1      |
| hsa-miR-342-3p | - | BYSL      | BYSL      |
| hsa-miR-342-3p | - | C10orf35  | C10orf35  |
| hsa-miR-342-3p | - | C10orf68  | C10orf68  |
| hsa-miR-342-3p | - | C10orf88  | C10orf88  |
| hsa-miR-342-3p | - | C12orf12  | C12orf12  |
| hsa-miR-342-3p | - | C14orf159 | C14orf159 |
| hsa-miR-342-3p | - | C16orf53  | C16orf53  |
| hsa-miR-342-3p | - | C20orf103 | C20orf103 |
| hsa-miR-342-3p | - | C20orf111 | C20orf111 |
| hsa-miR-342-3p | - | C20orf114 | C20orf114 |
| hsa-miR-342-3p | - | C21orf7   | C21orf7   |
| hsa-miR-342-3p | - | C3orf1    | C3orf1    |
| hsa-miR-342-3p | - | C5orf27   | C5orf27   |
| hsa-miR-342-3p | - | C6orf167  | C6orf167  |
| hsa-miR-342-3p | - | C6orf192  | C6orf192  |

|                |   |          |          |
|----------------|---|----------|----------|
| 3p             |   |          |          |
| hsa-miR-342-3p | - | C6orf48  | C6orf48  |
| hsa-miR-342-3p | - | C9orf117 | C9orf117 |
| hsa-miR-342-3p | - | CA12     | CA12     |
| hsa-miR-342-3p | - | CABP4    | CABP4    |
| hsa-miR-342-3p | - | CADM1    | CADM1    |
| hsa-miR-342-3p | - | CAMK2N1  | CAMK2N1  |
| hsa-miR-342-3p | - | CAMKV    | CAMKV    |
| hsa-miR-342-3p | - | CARTPT   | CARTPT   |
| hsa-miR-342-3p | - | CAST     | CAST     |
| hsa-miR-342-3p | - | CD2      | CD2      |
| hsa-miR-342-3p | - | CD3G     | CD3G     |
| hsa-miR-342-3p | - | CD55     | CD55     |
| hsa-miR-342-3p | - | CDKN2D   | CDKN2D   |
| hsa-miR-342-3p | - | CEPT1    | CEPT1    |
| hsa-miR-342-3p | - | CHRM1    | CHRM1    |
| hsa-miR-342-3p | - | CHST4    | CHST4    |
| hsa-miR-342-3p | - | CILP2    | CILP2    |
| hsa-miR-342-3p | - | CLCNKA   | CLCNKA   |
| hsa-miR-342-3p | - | CLCNKB   | CLCNKB   |
| hsa-miR-342-3p | - | CMTM4    | CMTM4    |
| hsa-miR-342-3p | - | CNPY1    | CNPY1    |
| hsa-miR-342-3p | - | COG2     | COG2     |
| hsa-miR-342-3p | - | COL2A1   | COL2A1   |
| hsa-miR-342-3p | - | COL4A6   | COL4A6   |
| hsa-miR-342-3p | - | COQ2     | COQ2     |
| hsa-miR-342-3p | - | COX17    | COX17    |
| hsa-miR-342-3p | - | CPA4     | CPA4     |
| hsa-miR-342-3p | - | CPT1C    | CPT1C    |

|                |   |         |         |
|----------------|---|---------|---------|
| 3p             |   |         |         |
| hsa-miR-342-3p | - | CRTAM   | CRTAM   |
| hsa-miR-342-3p | - | CSNK1A1 | CSNK1A1 |
| hsa-miR-342-3p | - | CTBP2   | CTBP2   |
| hsa-miR-342-3p | - | CUL1    | CUL1    |
| hsa-miR-342-3p | - | CUL2    | CUL2    |
| hsa-miR-342-3p | - | DDX50   | DDX50   |
| hsa-miR-342-3p | - | DGAT2   | DGAT2   |
| hsa-miR-342-3p | - | DMRTC2  | DMRTC2  |
| hsa-miR-342-3p | - | DNMT1   | DNMT1   |
| hsa-miR-342-3p | - | DOK1    | DOK1    |
| hsa-miR-342-3p | - | DSCR10  | DSCR10  |
| hsa-miR-342-3p | - | DTD1    | DTD1    |
| hsa-miR-342-3p | - | DTNBP1  | DTNBP1  |
| hsa-miR-342-3p | - | DTX3    | DTX3    |
| hsa-miR-342-3p | - | DUSP26  | DUSP26  |
| hsa-miR-342-3p | - | EBF1    | EBF1    |
| hsa-miR-342-3p | - | ENSA    | ENSA    |
| hsa-miR-342-3p | - | ERN1    | ERN1    |
| hsa-miR-342-3p | - | ETAA1   | ETAA1   |
| hsa-miR-342-3p | - | FAM119A | FAM119A |
| hsa-miR-342-3p | - | FAM123B | FAM123B |
| hsa-miR-342-3p | - | FAM89A  | FAM89A  |
| hsa-miR-342-3p | - | FANCE   | FANCE   |
| hsa-miR-342-3p | - | FBXO24  | FBXO24  |
| hsa-miR-342-3p | - | FBXO4   | FBXO4   |
| hsa-miR-342-3p | - | FEM1A   | FEM1A   |
| hsa-miR-342-3p | - | FHL3    | FHL3    |
| hsa-miR-342-3p | - | FLII    | FLII    |

|                |   |         |         |
|----------------|---|---------|---------|
| 3p             |   |         |         |
| hsa-miR-342-3p | - | FLNC    | FLNC    |
| hsa-miR-342-3p | - | FOXQ1   | FOXQ1   |
| hsa-miR-342-3p | - | FUT8    | FUT8    |
| hsa-miR-342-3p | - | GBA     | GBA     |
| hsa-miR-342-3p | - | GGA1    | GGA1    |
| hsa-miR-342-3p | - | GLDC    | GLDC    |
| hsa-miR-342-3p | - | GPHB5   | GPHB5   |
| hsa-miR-342-3p | - | GPR143  | GPR143  |
| hsa-miR-342-3p | - | GPR176  | GPR176  |
| hsa-miR-342-3p | - | GPR45   | GPR45   |
| hsa-miR-342-3p | - | GPR6    | GPR6    |
| hsa-miR-342-3p | - | GPR63   | GPR63   |
| hsa-miR-342-3p | - | GPRIN1  | GPRIN1  |
| hsa-miR-342-3p | - | GRN     | GRN     |
| hsa-miR-342-3p | - | GSTA4   | GSTA4   |
| hsa-miR-342-3p | - | GTF3C3  | GTF3C3  |
| hsa-miR-342-3p | - | H2AFY   | H2AFY   |
| hsa-miR-342-3p | - | HEATR1  | HEATR1  |
| hsa-miR-342-3p | - | HEPACAM | HEPACAM |
| hsa-miR-342-3p | - | HNF4A   | HNF4A   |
| hsa-miR-342-3p | - | HOXB8   | HOXB8   |
| hsa-miR-342-3p | - | HOXC6   | HOXC6   |
| hsa-miR-342-3p | - | HRSP12  | HRSP12  |
| hsa-miR-342-3p | - | IER3    | IER3    |
| hsa-miR-342-3p | - | IL15RA  | IL15RA  |
| hsa-miR-342-3p | - | IL1RL1  | IL1RL1  |
| hsa-miR-342-3p | - | IL24    | IL24    |
| hsa-miR-342-3p | - | IL3     | IL3     |

|                |   |          |          |
|----------------|---|----------|----------|
| 3p             |   |          |          |
| hsa-miR-342-3p | - | IRX3     | IRX3     |
| hsa-miR-342-3p | - | JPH3     | JPH3     |
| hsa-miR-342-3p | - | KCNA2    | KCNA2    |
| hsa-miR-342-3p | - | KCTD10   | KCTD10   |
| hsa-miR-342-3p | - | KCTD6    | KCTD6    |
| hsa-miR-342-3p | - | KIAA1967 | KIAA1967 |
| hsa-miR-342-3p | - | KLF6     | KLF6     |
| hsa-miR-342-3p | - | LASP1    | LASP1    |
| hsa-miR-342-3p | - | LATS2    | LATS2    |
| hsa-miR-342-3p | - | LENG8    | LENG8    |
| hsa-miR-342-3p | - | LIG1     | LIG1     |
| hsa-miR-342-3p | - | LMAN1L   | LMAN1L   |
| hsa-miR-342-3p | - | LRRC57   | LRRC57   |
| hsa-miR-342-3p | - | LUZP1    | LUZP1    |
| hsa-miR-342-3p | - | LYPLAL1  | LYPLAL1  |
| hsa-miR-342-3p | - | MAF      | MAF      |
| hsa-miR-342-3p | - | MAGEA8   | MAGEA8   |
| hsa-miR-342-3p | - | MAGEB2   | MAGEB2   |
| hsa-miR-342-3p | - | MAGED1   | MAGED1   |
| hsa-miR-342-3p | - | MARK3    | MARK3    |
| hsa-miR-342-3p | - | MATN1    | MATN1    |
| hsa-miR-342-3p | - | ME3      | ME3      |
| hsa-miR-342-3p | - | METT5D1  | METT5D1  |
| hsa-miR-342-3p | - | METTL7A  | METTL7A  |
| hsa-miR-342-3p | - | MFN2     | MFN2     |
| hsa-miR-342-3p | - | MRFAP1   | MRFAP1   |
| hsa-miR-342-3p | - | MSI1     | MSI1     |
| hsa-miR-342-3p | - | MYLK2    | MYLK2    |

|                |   |         |         |
|----------------|---|---------|---------|
| 3p             |   |         |         |
| hsa-miR-342-3p | - | NAPRT1  | NAPRT1  |
| hsa-miR-342-3p | - | NCBP1   | NCBP1   |
| hsa-miR-342-3p | - | NDN     | NDN     |
| hsa-miR-342-3p | - | NEK3    | NEK3    |
| hsa-miR-342-3p | - | NKX2-2  | NKX2-2  |
| hsa-miR-342-3p | - | NOMO3   | NOMO3   |
| hsa-miR-342-3p | - | NOS1AP  | NOS1AP  |
| hsa-miR-342-3p | - | NOVA2   | NOVA2   |
| hsa-miR-342-3p | - | NR4A2   | NR4A2   |
| hsa-miR-342-3p | - | NRG1    | NRG1    |
| hsa-miR-342-3p | - | NSD1    | NSD1    |
| hsa-miR-342-3p | - | NSMCE4A | NSMCE4A |
| hsa-miR-342-3p | - | NUBPL   | NUBPL   |
| hsa-miR-342-3p | - | NUP43   | NUP43   |
| hsa-miR-342-3p | - | OBFC2B  | OBFC2B  |
| hsa-miR-342-3p | - | ODZ4    | ODZ4    |
| hsa-miR-342-3p | - | OSBPL7  | OSBPL7  |
| hsa-miR-342-3p | - | P2RY13  | P2RY13  |
| hsa-miR-342-3p | - | P2RY2   | P2RY2   |
| hsa-miR-342-3p | - | P4HA2   | P4HA2   |
| hsa-miR-342-3p | - | PADI2   | PADI2   |
| hsa-miR-342-3p | - | PANK2   | PANK2   |
| hsa-miR-342-3p | - | PAQR6   | PAQR6   |
| hsa-miR-342-3p | - | PCM1    | PCM1    |
| hsa-miR-342-3p | - | PDGFRA  | PDGFRA  |
| hsa-miR-342-3p | - | PIK3AP1 | PIK3AP1 |
| hsa-miR-342-3p | - | PIN4    | PIN4    |
| hsa-miR-342-   | - | PKD2L1  | PKD2L1  |

|                |   |          |          |
|----------------|---|----------|----------|
| 3p             |   |          |          |
| hsa-miR-342-3p | - | PKDREJ   | PKDREJ   |
| hsa-miR-342-3p | - | PLAU     | PLAU     |
| hsa-miR-342-3p | - | PLEKHH2  | PLEKHH2  |
| hsa-miR-342-3p | - | PLSCR3   | PLSCR3   |
| hsa-miR-342-3p | - | PNPLA2   | PNPLA2   |
| hsa-miR-342-3p | - | POFUT1   | POFUT1   |
| hsa-miR-342-3p | - | PPP1R3F  | PPP1R3F  |
| hsa-miR-342-3p | - | PPP3R1   | PPP3R1   |
| hsa-miR-342-3p | - | PRAME    | PRAME    |
| hsa-miR-342-3p | - | PRAMEF13 | PRAMEF13 |
| hsa-miR-342-3p | - | PRAMEF14 | PRAMEF14 |
| hsa-miR-342-3p | - | PRDM7    | PRDM7    |
| hsa-miR-342-3p | - | PRPF3    | PRPF3    |
| hsa-miR-342-3p | - | PRPF40B  | PRPF40B  |
| hsa-miR-342-3p | - | PRPS1    | PRPS1    |
| hsa-miR-342-3p | - | PSME4    | PSME4    |
| hsa-miR-342-3p | - | PTCRA    | PTCRA    |
| hsa-miR-342-3p | - | PTMA     | PTMA     |
| hsa-miR-342-3p | - | PTPRN    | PTPRN    |
| hsa-miR-342-3p | - | PTS      | PTS      |
| hsa-miR-342-3p | - | PYCR1    | PYCR1    |
| hsa-miR-342-3p | - | RAD52    | RAD52    |
| hsa-miR-342-3p | - | RASA1    | RASA1    |
| hsa-miR-342-3p | - | RBBP6    | RBBP6    |
| hsa-miR-342-3p | - | RBM19    | RBM19    |
| hsa-miR-342-3p | - | REEP2    | REEP2    |
| hsa-miR-342-3p | - | REG3A    | REG3A    |
| hsa-miR-342-3p | - | RGS4     | RGS4     |

|                |   |          |          |
|----------------|---|----------|----------|
| 3p             |   |          |          |
| hsa-miR-342-3p | - | RPN1     | RPN1     |
| hsa-miR-342-3p | - | RPS6KB2  | RPS6KB2  |
| hsa-miR-342-3p | - | RRM2     | RRM2     |
| hsa-miR-342-3p | - | RSBN1    | RSBN1    |
| hsa-miR-342-3p | - | SAMD7    | SAMD7    |
| hsa-miR-342-3p | - | SC4MOL   | SC4MOL   |
| hsa-miR-342-3p | - | SCRN2    | SCRN2    |
| hsa-miR-342-3p | - | SEC23B   | SEC23B   |
| hsa-miR-342-3p | - | SEC61G   | SEC61G   |
| hsa-miR-342-3p | - | SELE     | SELE     |
| hsa-miR-342-3p | - | SEMA4C   | SEMA4C   |
| hsa-miR-342-3p | - | SEPT3    | SEPT3    |
| hsa-miR-342-3p | - | SETD3    | SETD3    |
| hsa-miR-342-3p | - | SETD4    | SETD4    |
| hsa-miR-342-3p | - | SGCZ     | SGCZ     |
| hsa-miR-342-3p | - | SLC15A1  | SLC15A1  |
| hsa-miR-342-3p | - | SLC22A5  | SLC22A5  |
| hsa-miR-342-3p | - | SLC30A9  | SLC30A9  |
| hsa-miR-342-3p | - | SLC35F2  | SLC35F2  |
| hsa-miR-342-3p | - | SLC6A4   | SLC6A4   |
| hsa-miR-342-3p | - | SMARCAD1 | SMARCAD1 |
| hsa-miR-342-3p | - | SNRPA    | SNRPA    |
| hsa-miR-342-3p | - | SNTG1    | SNTG1    |
| hsa-miR-342-3p | - | SNX15    | SNX15    |
| hsa-miR-342-3p | - | SOX21    | SOX21    |
| hsa-miR-342-3p | - | SP140    | SP140    |
| hsa-miR-342-3p | - | SPAG9    | SPAG9    |
| hsa-miR-342-3p | - | SPERT    | SPERT    |



|                |   |          |          |
|----------------|---|----------|----------|
| 3p             |   |          |          |
| hsa-miR-342-3p | - | SPINT2   | SPINT2   |
| hsa-miR-342-3p | - | SPRR4    | SPRR4    |
| hsa-miR-342-3p | - | SSBP3    | SSBP3    |
| hsa-miR-342-3p | - | STARD13  | STARD13  |
| hsa-miR-342-3p | - | STOML1   | STOML1   |
| hsa-miR-342-3p | - | SVOPL    | SVOPL    |
| hsa-miR-342-3p | - | SYNJ2    | SYNJ2    |
| hsa-miR-342-3p | - | SYNPO2L  | SYNPO2L  |
| hsa-miR-342-3p | - | TACR3    | TACR3    |
| hsa-miR-342-3p | - | TANC2    | TANC2    |
| hsa-miR-342-3p | - | TBC1D10A | TBC1D10A |
| hsa-miR-342-3p | - | TDRKH    | TDRKH    |
| hsa-miR-342-3p | - | TENC1    | TENC1    |
| hsa-miR-342-3p | - | THAP3    | THAP3    |
| hsa-miR-342-3p | - | THYN1    | THYN1    |
| hsa-miR-342-3p | - | TICAM2   | TICAM2   |
| hsa-miR-342-3p | - | TJP2     | TJP2     |
| hsa-miR-342-3p | - | TM2D3    | TM2D3    |
| hsa-miR-342-3p | - | TM6SF1   | TM6SF1   |
| hsa-miR-342-3p | - | TMED9    | TMED9    |
| hsa-miR-342-3p | - | TMEM135  | TMEM135  |
| hsa-miR-342-3p | - | TMEM179  | TMEM179  |
| hsa-miR-342-3p | - | TMPRSS5  | TMPRSS5  |
| hsa-miR-342-3p | - | TNFSF11  | TNFSF11  |
| hsa-miR-342-3p | - | TOR1AIP1 | TOR1AIP1 |
| hsa-miR-342-3p | - | TPK1     | TPK1     |
| hsa-miR-342-3p | - | TRAF2    | TRAF2    |
| hsa-miR-342-   | - | TRIOBP   | TRIOBP   |

|                |   |         |         |
|----------------|---|---------|---------|
| 3p             |   |         |         |
| hsa-miR-342-3p | - | TRIT1   | TRIT1   |
| hsa-miR-342-3p | - | TRPC4AP | TRPC4AP |
| hsa-miR-342-3p | - | TSN     | TSN     |
| hsa-miR-342-3p | - | TSPAN4  | TSPAN4  |
| hsa-miR-342-3p | - | TTBK2   | TTBK2   |
| hsa-miR-342-3p | - | TTLL12  | TTLL12  |
| hsa-miR-342-3p | - | UBL4A   | UBL4A   |
| hsa-miR-342-3p | - | UBQLN3  | UBQLN3  |
| hsa-miR-342-3p | - | UBQLN4  | UBQLN4  |
| hsa-miR-342-3p | - | UCHL5   | UCHL5   |
| hsa-miR-342-3p | - | UCN2    | UCN2    |
| hsa-miR-342-3p | - | UEVLD   | UEVLD   |
| hsa-miR-342-3p | - | UPF3A   | UPF3A   |
| hsa-miR-342-3p | - | UXS1    | UXS1    |
| hsa-miR-342-3p | - | VPREB3  | VPREB3  |
| hsa-miR-342-3p | - | VSIG8   | VSIG8   |
| hsa-miR-342-3p | - | WDFY2   | WDFY2   |
| hsa-miR-342-3p | - | WDR25   | WDR25   |
| hsa-miR-342-3p | - | WHSC1   | WHSC1   |
| hsa-miR-342-3p | - | WHSC2   | WHSC2   |
| hsa-miR-342-3p | - | WIPI1   | WIPI1   |
| hsa-miR-342-3p | - | WNT10B  | WNT10B  |
| hsa-miR-342-3p | - | XPO7    | XPO7    |
| hsa-miR-342-3p | - | YARS2   | YARS2   |
| hsa-miR-342-3p | - | ZBTB4   | ZBTB4   |
| hsa-miR-342-3p | - | ZC3H14  | ZC3H14  |
| hsa-miR-342-3p | - | ZCCHC12 | ZCCHC12 |
| hsa-miR-342-3p | - | ZDHHC7  | ZDHHC7  |

|                |   |          |          |
|----------------|---|----------|----------|
| 3p             |   |          |          |
| hsa-miR-342-3p | - | ZFP28    | ZFP28    |
| hsa-miR-342-3p | - | ZNF259   | ZNF259   |
| hsa-miR-342-3p | - | ZNF263   | ZNF263   |
| hsa-miR-342-3p | - | ZNF330   | ZNF330   |
| hsa-miR-342-3p | - | ZNF397   | ZNF397   |
| hsa-miR-342-3p | - | ZNF438   | ZNF438   |
| hsa-miR-342-3p | - | ZNF462   | ZNF462   |
| hsa-miR-342-3p | - | ZNF580   | ZNF580   |
| hsa-miR-342-3p | - | ZNF583   | ZNF583   |
| hsa-miR-342-3p | - | ZNF585B  | ZNF585B  |
| hsa-miR-342-3p | - | ZNF595   | ZNF595   |
| hsa-miR-342-3p | - | ZNF684   | ZNF684   |
| hsa-miR-342-5p | - | AACS     | AACS     |
| hsa-miR-342-5p | - | ACLY     | ACLY     |
| hsa-miR-342-5p | - | ADAM8    | ADAM8    |
| hsa-miR-342-5p | - | AGXT     | AGXT     |
| hsa-miR-342-5p | - | AHNAK2   | AHNAK2   |
| hsa-miR-342-5p | - | AIG1     | AIG1     |
| hsa-miR-342-5p | - | AJAP1    | AJAP1    |
| hsa-miR-342-5p | - | AKAP4    | AKAP4    |
| hsa-miR-342-5p | - | ALDH16A1 | ALDH16A1 |
| hsa-miR-342-5p | - | ALDH1L1  | ALDH1L1  |
| hsa-miR-342-5p | - | ALG12    | ALG12    |
| hsa-miR-342-5p | - | AMIGO1   | AMIGO1   |
| hsa-miR-342-5p | - | AMIGO3   | AMIGO3   |
| hsa-miR-342-5p | - | AP2S1    | AP2S1    |
| hsa-miR-342-5p | - | AQP5     | AQP5     |
| hsa-miR-342-   | - | ARAF     | ARAF     |

|                |   |          |          |
|----------------|---|----------|----------|
| 5p             |   |          |          |
| hsa-miR-342-5p | - | ARHGEF16 | ARHGEF16 |
| hsa-miR-342-5p | - | ARMC3    | ARMC3    |
| hsa-miR-342-5p | - | ATP13A2  | ATP13A2  |
| hsa-miR-342-5p | - | ATP4A    | ATP4A    |
| hsa-miR-342-5p | - | ATP6V1B1 | ATP6V1B1 |
| hsa-miR-342-5p | - | AVPR2    | AVPR2    |
| hsa-miR-342-5p | - | BCL2L1   | BCL2L1   |
| hsa-miR-342-5p | - | BNC2     | BNC2     |
| hsa-miR-342-5p | - | BTBD11   | BTBD11   |
| hsa-miR-342-5p | - | C12orf34 | C12orf34 |
| hsa-miR-342-5p | - | C14orf68 | C14orf68 |
| hsa-miR-342-5p | - | C15orf44 | C15orf44 |
| hsa-miR-342-5p | - | C17orf59 | C17orf59 |
| hsa-miR-342-5p | - | C3orf36  | C3orf36  |
| hsa-miR-342-5p | - | C6orf134 | C6orf134 |
| hsa-miR-342-5p | - | CACNA1C  | CACNA1C  |
| hsa-miR-342-5p | - | CADM4    | CADM4    |
| hsa-miR-342-5p | - | CCT7     | CCT7     |
| hsa-miR-342-5p | - | CD34     | CD34     |
| hsa-miR-342-5p | - | CD99     | CD99     |
| hsa-miR-342-5p | - | CDA      | CDA      |
| hsa-miR-342-5p | - | CDC42EP5 | CDC42EP5 |
| hsa-miR-342-5p | - | CDH23    | CDH23    |
| hsa-miR-342-5p | - | CKB      | CKB      |
| hsa-miR-342-5p | - | CLCNKA   | CLCNKA   |
| hsa-miR-342-5p | - | CLCNKB   | CLCNKB   |
| hsa-miR-342-5p | - | CLDN7    | CLDN7    |
| hsa-miR-342-   | - | COL11A2  | COL11A2  |

|                |   |         |         |
|----------------|---|---------|---------|
| 5p             |   |         |         |
| hsa-miR-342-5p | - | COPE    | COPE    |
| hsa-miR-342-5p | - | COPS6   | COPS6   |
| hsa-miR-342-5p | - | CREB3L1 | CREB3L1 |
| hsa-miR-342-5p | - | CRELD1  | CRELD1  |
| hsa-miR-342-5p | - | CRLF1   | CRLF1   |
| hsa-miR-342-5p | - | CRNN    | CRNN    |
| hsa-miR-342-5p | - | CSAD    | CSAD    |
| hsa-miR-342-5p | - | CSK     | CSK     |
| hsa-miR-342-5p | - | CYP4A11 | CYP4A11 |
| hsa-miR-342-5p | - | CYP4A22 | CYP4A22 |
| hsa-miR-342-5p | - | DDR1    | DDR1    |
| hsa-miR-342-5p | - | DDX1    | DDX1    |
| hsa-miR-342-5p | - | DEGS2   | DEGS2   |
| hsa-miR-342-5p | - | DGAT1   | DGAT1   |
| hsa-miR-342-5p | - | DLL3    | DLL3    |
| hsa-miR-342-5p | - | DNTTIP1 | DNTTIP1 |
| hsa-miR-342-5p | - | EFNA3   | EFNA3   |
| hsa-miR-342-5p | - | EGFL8   | EGFL8   |
| hsa-miR-342-5p | - | ENG     | ENG     |
| hsa-miR-342-5p | - | EPHA1   | EPHA1   |
| hsa-miR-342-5p | - | ERN1    | ERN1    |
| hsa-miR-342-5p | - | ERN2    | ERN2    |
| hsa-miR-342-5p | - | ETV7    | ETV7    |
| hsa-miR-342-5p | - | FAH     | FAH     |
| hsa-miR-342-5p | - | FAM89B  | FAM89B  |
| hsa-miR-342-5p | - | FASTK   | FASTK   |
| hsa-miR-342-5p | - | FCER2   | FCER2   |
| hsa-miR-342-5p | - | FGF14   | FGF14   |

|                |   |        |        |
|----------------|---|--------|--------|
| 5p             |   |        |        |
| hsa-miR-342-5p | - | FOXD3  | FOXD3  |
| hsa-miR-342-5p | - | FXYD7  | FXYD7  |
| hsa-miR-342-5p | - | FZR1   | FZR1   |
| hsa-miR-342-5p | - | GALK1  | GALK1  |
| hsa-miR-342-5p | - | GALK2  | GALK2  |
| hsa-miR-342-5p | - | GAPVD1 | GAPVD1 |
| hsa-miR-342-5p | - | GATA1  | GATA1  |
| hsa-miR-342-5p | - | GFI1B  | GFI1B  |
| hsa-miR-342-5p | - | GINS3  | GINS3  |
| hsa-miR-342-5p | - | GNG3   | GNG3   |
| hsa-miR-342-5p | - | GPX4   | GPX4   |
| hsa-miR-342-5p | - | GYPC   | GYPC   |
| hsa-miR-342-5p | - | HIF3A  | HIF3A  |
| hsa-miR-342-5p | - | HIRIP3 | HIRIP3 |
| hsa-miR-342-5p | - | HPCA   | HPCA   |
| hsa-miR-342-5p | - | HRK    | HRK    |
| hsa-miR-342-5p | - | HTR3B  | HTR3B  |
| hsa-miR-342-5p | - | HYAL2  | HYAL2  |
| hsa-miR-342-5p | - | IDH3G  | IDH3G  |
| hsa-miR-342-5p | - | IDUA   | IDUA   |
| hsa-miR-342-5p | - | IL27RA | IL27RA |
| hsa-miR-342-5p | - | IL2RG  | IL2RG  |
| hsa-miR-342-5p | - | ING4   | ING4   |
| hsa-miR-342-5p | - | IRF2   | IRF2   |
| hsa-miR-342-5p | - | ITGB4  | ITGB4  |
| hsa-miR-342-5p | - | ITPA   | ITPA   |
| hsa-miR-342-5p | - | KBTBD4 | KBTBD4 |
| hsa-miR-342-5p | - | KBTBD5 | KBTBD5 |

|                |   |            |            |
|----------------|---|------------|------------|
| 5p             |   |            |            |
| hsa-miR-342-5p | - | KIAA1539   | KIAA1539   |
| hsa-miR-342-5p | - | KIAA1704   | KIAA1704   |
| hsa-miR-342-5p | - | KIAA1967   | KIAA1967   |
| hsa-miR-342-5p | - | KLRG2      | KLRG2      |
| hsa-miR-342-5p | - | KRT81      | KRT81      |
| hsa-miR-342-5p | - | KRTAP10-10 | KRTAP10-10 |
| hsa-miR-342-5p | - | L1CAM      | L1CAM      |
| hsa-miR-342-5p | - | LALBA      | LALBA      |
| hsa-miR-342-5p | - | LCE2D      | LCE2D      |
| hsa-miR-342-5p | - | LCP1       | LCP1       |
| hsa-miR-342-5p | - | LEPRE1     | LEPRE1     |
| hsa-miR-342-5p | - | LEPREL2    | LEPREL2    |
| hsa-miR-342-5p | - | LRCH1      | LRCH1      |
| hsa-miR-342-5p | - | LRCH4      | LRCH4      |
| hsa-miR-342-5p | - | LRP1       | LRP1       |
| hsa-miR-342-5p | - | LRRN2      | LRRN2      |
| hsa-miR-342-5p | - | LST1       | LST1       |
| hsa-miR-342-5p | - | MAG        | MAG        |
| hsa-miR-342-5p | - | MAP1LC3A   | MAP1LC3A   |
| hsa-miR-342-5p | - | MAPK15     | MAPK15     |
| hsa-miR-342-5p | - | MARK2      | MARK2      |
| hsa-miR-342-5p | - | MCAM       | MCAM       |
| hsa-miR-342-5p | - | MCF2L      | MCF2L      |
| hsa-miR-342-5p | - | MEA1       | MEA1       |
| hsa-miR-342-5p | - | MFNG       | MFNG       |
| hsa-miR-342-5p | - | MRPL2      | MRPL2      |
| hsa-miR-342-5p | - | MT3        | MT3        |
| hsa-miR-342-5p | - | MTMR8      | MTMR8      |

|                |   |         |         |
|----------------|---|---------|---------|
| 5p             |   |         |         |
| hsa-miR-342-5p | - | MXRA8   | MXRA8   |
| hsa-miR-342-5p | - | MYOM3   | MYOM3   |
| hsa-miR-342-5p | - | MYST1   | MYST1   |
| hsa-miR-342-5p | - | NAGPA   | NAGPA   |
| hsa-miR-342-5p | - | NARFL   | NARFL   |
| hsa-miR-342-5p | - | NARS2   | NARS2   |
| hsa-miR-342-5p | - | NLRP4   | NLRP4   |
| hsa-miR-342-5p | - | NLRP7   | NLRP7   |
| hsa-miR-342-5p | - | NOD2    | NOD2    |
| hsa-miR-342-5p | - | NPVF    | NPVF    |
| hsa-miR-342-5p | - | NR2F6   | NR2F6   |
| hsa-miR-342-5p | - | NR4A1   | NR4A1   |
| hsa-miR-342-5p | - | NT5M    | NT5M    |
| hsa-miR-342-5p | - | OAF     | OAF     |
| hsa-miR-342-5p | - | OGG1    | OGG1    |
| hsa-miR-342-5p | - | OSM     | OSM     |
| hsa-miR-342-5p | - | OTOA    | OTOA    |
| hsa-miR-342-5p | - | PANX1   | PANX1   |
| hsa-miR-342-5p | - | PAX4    | PAX4    |
| hsa-miR-342-5p | - | PCBP4   | PCBP4   |
| hsa-miR-342-5p | - | PCDH1   | PCDH1   |
| hsa-miR-342-5p | - | PCSK4   | PCSK4   |
| hsa-miR-342-5p | - | PDZD3   | PDZD3   |
| hsa-miR-342-5p | - | PDZD4   | PDZD4   |
| hsa-miR-342-5p | - | PFKFB1  | PFKFB1  |
| hsa-miR-342-5p | - | PFN1    | PFN1    |
| hsa-miR-342-5p | - | PGLYRP1 | PGLYRP1 |
| hsa-miR-342-   | - | PHKA2   | PHKA2   |



|                |   |          |          |
|----------------|---|----------|----------|
| 5p             |   |          |          |
| hsa-miR-342-5p | - | PHOSPHO1 | PHOSPHO1 |
| hsa-miR-342-5p | - | PITPNM1  | PITPNM1  |
| hsa-miR-342-5p | - | PKN3     | PKN3     |
| hsa-miR-342-5p | - | PNCK     | PNCK     |
| hsa-miR-342-5p | - | POFUT1   | POFUT1   |
| hsa-miR-342-5p | - | PPYR1    | PPYR1    |
| hsa-miR-342-5p | - | PRELID1  | PRELID1  |
| hsa-miR-342-5p | - | PRKAR2A  | PRKAR2A  |
| hsa-miR-342-5p | - | PRRG3    | PRRG3    |
| hsa-miR-342-5p | - | PSMC4    | PSMC4    |
| hsa-miR-342-5p | - | PTPRN2   | PTPRN2   |
| hsa-miR-342-5p | - | RAC2     | RAC2     |
| hsa-miR-342-5p | - | RASSF1   | RASSF1   |
| hsa-miR-342-5p | - | RDH16    | RDH16    |
| hsa-miR-342-5p | - | RELB     | RELB     |
| hsa-miR-342-5p | - | RHCG     | RHCG     |
| hsa-miR-342-5p | - | RHOG     | RHOG     |
| hsa-miR-342-5p | - | RHOH     | RHOH     |
| hsa-miR-342-5p | - | RNPS1    | RNPS1    |
| hsa-miR-342-5p | - | RUVBL1   | RUVBL1   |
| hsa-miR-342-5p | - | SAP130   | SAP130   |
| hsa-miR-342-5p | - | SAT1     | SAT1     |
| hsa-miR-342-5p | - | SEC24C   | SEC24C   |
| hsa-miR-342-5p | - | SEZ6L2   | SEZ6L2   |
| hsa-miR-342-5p | - | SF3B4    | SF3B4    |
| hsa-miR-342-5p | - | SH2D3C   | SH2D3C   |
| hsa-miR-342-5p | - | SLC35A2  | SLC35A2  |
| hsa-miR-342-5p | - | SNCB     | SNCB     |

|                |   |          |          |
|----------------|---|----------|----------|
| 5p             |   |          |          |
| hsa-miR-342-5p | - | SPDEF    | SPDEF    |
| hsa-miR-342-5p | - | SPTBN4   | SPTBN4   |
| hsa-miR-342-5p | - | SSR4     | SSR4     |
| hsa-miR-342-5p | - | ST3GAL3  | ST3GAL3  |
| hsa-miR-342-5p | - | TBC1D3   | TBC1D3   |
| hsa-miR-342-5p | - | TBC1D3B  | TBC1D3B  |
| hsa-miR-342-5p | - | TBC1D3C  | TBC1D3C  |
| hsa-miR-342-5p | - | TBC1D3G  | TBC1D3G  |
| hsa-miR-342-5p | - | TBXAS1   | TBXAS1   |
| hsa-miR-342-5p | - | TENC1    | TENC1    |
| hsa-miR-342-5p | - | TFEB     | TFEB     |
| hsa-miR-342-5p | - | TGM7     | TGM7     |
| hsa-miR-342-5p | - | TICAM1   | TICAM1   |
| hsa-miR-342-5p | - | TIMELESS | TIMELESS |
| hsa-miR-342-5p | - | TIMM17B  | TIMM17B  |
| hsa-miR-342-5p | - | TM7SF2   | TM7SF2   |
| hsa-miR-342-5p | - | TMC6     | TMC6     |
| hsa-miR-342-5p | - | TMEM134  | TMEM134  |
| hsa-miR-342-5p | - | TNFRSF6B | TNFRSF6B |
| hsa-miR-342-5p | - | TNXB     | TNXB     |
| hsa-miR-342-5p | - | TUSC2    | TUSC2    |
| hsa-miR-342-5p | - | UBAC2    | UBAC2    |
| hsa-miR-342-5p | - | UQCRB    | UQCRB    |
| hsa-miR-342-5p | - | USP36    | USP36    |
| hsa-miR-342-5p | - | VAMP5    | VAMP5    |
| hsa-miR-342-5p | - | ZBTB32   | ZBTB32   |
| hsa-miR-342-5p | - | ZFP3     | ZFP3     |
| hsa-miR-342-5p | - | ZMYND10  | ZMYND10  |

|                |          |          |         |
|----------------|----------|----------|---------|
| 5p             |          |          |         |
| hsa-miR-342-5p | -        | ZNF468   | ZNF468  |
| hsa-miR-342-5p | -        | ZNF774   | ZNF774  |
| hsa-miR-342-5p | -        | ZNRF1    | ZNRF1   |
| hsa-miR-345    | AACS     | AACS     | -       |
| hsa-miR-345    | AASS     | AASS     | -       |
| hsa-miR-345    | ABAT     | ABAT     | -       |
| hsa-miR-345    | ABCA13   | ABCA13   | -       |
| hsa-miR-345    | ABCB5    | ABCB5    | -       |
| hsa-miR-345    | ABCC5    | ABCC5    | -       |
| hsa-miR-345    | ABCD1    | -        | ABCD1   |
| hsa-miR-345    | ABCG2    | ABCG2    | -       |
| hsa-miR-345    | ABHD11   | -        | ABHD11  |
| hsa-miR-345    | ABHD14A  | -        | ABHD14A |
| hsa-miR-345    | ABHD15   | ABHD15   | -       |
| hsa-miR-345    | ABL1     | -        | ABL1    |
| hsa-miR-345    | ABLIM3   | ABLIM3   | -       |
| hsa-miR-345    | ACADS    | -        | ACADS   |
| hsa-miR-345    | ACCN4    | ACCN4    | -       |
| hsa-miR-345    | ACER3    | ACER3    | -       |
| hsa-miR-345    | ACSL3    | ACSL3    | -       |
| hsa-miR-345    | ACSL6    | ACSL6    | -       |
| hsa-miR-345    | ACSS2    | ACSS2    | -       |
| hsa-miR-345    | ACSS3    | ACSS3    | -       |
| hsa-miR-345    | ACTR1A   | ACTR1A   | -       |
| hsa-miR-345    | ACVRL1   | ACVRL1   | -       |
| hsa-miR-345    | ADAMTS4  | ADAMTS4  | -       |
| hsa-miR-345    | ADAMTSL4 | ADAMTSL4 | -       |
| hsa-miR-345    | ADARB1   | ADARB1   | -       |
| hsa-miR-345    | ADCY6    | ADCY6    | -       |
| hsa-miR-345    | ADD1     | ADD1     | -       |
| hsa-miR-345    | ADHFE1   | -        | ADHFE1  |
| hsa-miR-345    | ADIG     | ADIG     | -       |
| hsa-miR-345    | ADRBK2   | -        | ADRBK2  |
| hsa-miR-345    | AFF2     | -        | AFF2    |
| hsa-miR-345    | AGPAT4   | -        | AGPAT4  |
| hsa-miR-345    | AHCYL2   | AHCYL2   | -       |
| hsa-miR-345    | AIDA     | AIDA     | -       |
| hsa-miR-345    | AIFM1    | AIFM1    | -       |
| hsa-miR-345    | AIMP2    | AIMP2    | -       |
| hsa-miR-345    | AK1      | -        | AK1     |
| hsa-miR-345    | AK2      | AK2      | -       |
| hsa-miR-345    | AK7      | AK7      | -       |
| hsa-miR-345    | AKIRIN1  | AKIRIN1  | -       |
| hsa-miR-345    | AKT2     | -        | AKT2    |
| hsa-miR-345    | ALCAM    | ALCAM    | -       |
| hsa-miR-345    | ALDH1A2  | ALDH1A2  | -       |
| hsa-miR-345    | ALDH1L2  | ALDH1L2  | -       |
| hsa-miR-345    | ALDOB    | ALDOB    | -       |

|             |           |           |          |
|-------------|-----------|-----------|----------|
| hsa-miR-345 | ALG6      | ALG6      | -        |
| hsa-miR-345 | ALKBH4    | ALKBH4    | -        |
| hsa-miR-345 | ALS2CR11  | ALS2CR11  | -        |
| hsa-miR-345 | ALX3      | -         | ALX3     |
| hsa-miR-345 | AMIGO1    | AMIGO1    | -        |
| hsa-miR-345 | ANKLE1    | ANKLE1    | -        |
| hsa-miR-345 | ANKRD13A  | ANKRD13A  | -        |
| hsa-miR-345 | ANKRD57   | ANKRD57   | -        |
| hsa-miR-345 | ANKRD6    | -         | ANKRD6   |
| hsa-miR-345 | ANXA11    | ANXA11    | -        |
| hsa-miR-345 | AP3M2     | AP3M2     | -        |
| hsa-miR-345 | AP4S1     | AP4S1     | -        |
| hsa-miR-345 | APBB1     | -         | APBB1    |
| hsa-miR-345 | APH1B     | APH1B     | -        |
| hsa-miR-345 | APOC2     | -         | APOC2    |
| hsa-miR-345 | APP       | APP       | -        |
| hsa-miR-345 | AQP2      | AQP2      | -        |
| hsa-miR-345 | ARFGEF2   | ARFGEF2   | -        |
| hsa-miR-345 | ARHGAP1   | ARHGAP1   | -        |
| hsa-miR-345 | ARHGAP11A | ARHGAP11A | -        |
| hsa-miR-345 | ARHGAP22  | -         | ARHGAP22 |
| hsa-miR-345 | ARHGAP28  | ARHGAP28  | -        |
| hsa-miR-345 | ARHGAP31  | ARHGAP31  | -        |
| hsa-miR-345 | ARHGAP32  | ARHGAP32  | -        |
| hsa-miR-345 | ARHGAP42  | ARHGAP42  | -        |
| hsa-miR-345 | ARHGEF11  | ARHGEF11  | -        |
| hsa-miR-345 | ARHGEF15  | ARHGEF15  | -        |
| hsa-miR-345 | ARHGEF17  | ARHGEF17  | -        |
| hsa-miR-345 | ARHGEF37  | ARHGEF37  | -        |
| hsa-miR-345 | ARHGEF9   | -         | ARHGEF9  |
| hsa-miR-345 | ARID1B    | ARID1B    | -        |
| hsa-miR-345 | ARIH1     | ARIH1     | -        |
| hsa-miR-345 | ARL2BP    | ARL2BP    | -        |
| hsa-miR-345 | ARL5A     | ARL5A     | -        |
| hsa-miR-345 | ARMC7     | -         | ARMC7    |
| hsa-miR-345 | ARNT      | ARNT      | -        |
| hsa-miR-345 | ARNT2     | ARNT2     | -        |
| hsa-miR-345 | ARSG      | -         | ARSG     |
| hsa-miR-345 | ASAP3     | ASAP3     | -        |
| hsa-miR-345 | ASB3      | ASB3      | -        |
| hsa-miR-345 | ASB7      | ASB7      | -        |
| hsa-miR-345 | ASXL1     | ASXL1     | -        |
| hsa-miR-345 | ATF3      | -         | ATF3     |
| hsa-miR-345 | ATG16L1   | -         | ATG16L1  |
| hsa-miR-345 | ATG4B     | ATG4B     | -        |
| hsa-miR-345 | ATP10B    | ATP10B    | -        |
| hsa-miR-345 | ATP6V0A2  | ATP6V0A2  | -        |
| hsa-miR-345 | ATP6V0A4  | ATP6V0A4  | -        |
| hsa-miR-345 | ATP8A2    | ATP8A2    | -        |
| hsa-miR-345 | ATP8B4    | ATP8B4    | -        |
| hsa-miR-345 | ATPAF1    | ATPAF1    | -        |

|             |          |          |          |
|-------------|----------|----------|----------|
| hsa-miR-345 | ATPAF2   | ATPAF2   | -        |
| hsa-miR-345 | ATPBD4   | ATPBD4   | -        |
| hsa-miR-345 | ATXN7L1  | ATXN7L1  | -        |
| hsa-miR-345 | AUH      | AUH      | -        |
| hsa-miR-345 | AVPR1A   | AVPR1A   | -        |
| hsa-miR-345 | AWAT2    | AWAT2    | -        |
| hsa-miR-345 | B4GALNT3 | -        | B4GALNT3 |
| hsa-miR-345 | B4GALNT4 | -        | B4GALNT4 |
| hsa-miR-345 | B4GALT1  | B4GALT1  | -        |
| hsa-miR-345 | BACE1    | BACE1    | -        |
| hsa-miR-345 | BAG1     | BAG1     | -        |
| hsa-miR-345 | -        | BAG3     | BAG3     |
| hsa-miR-345 | -        | BAT4     | BAT4     |
| hsa-miR-345 | BBX      | BBX      | -        |
| hsa-miR-345 | BCAS3    | -        | BCAS3    |
| hsa-miR-345 | BCL11A   | BCL11A   | -        |
| hsa-miR-345 | BCL2     | BCL2     | -        |
| hsa-miR-345 | BCL2L11  | BCL2L11  | -        |
| hsa-miR-345 | BCL2L14  | BCL2L14  | -        |
| hsa-miR-345 | BCL9L    | BCL9L    | -        |
| hsa-miR-345 | BCOR     | BCOR     | -        |
| hsa-miR-345 | BEND4    | BEND4    | -        |
| hsa-miR-345 | BEST1    | -        | BEST1    |
| hsa-miR-345 | BET1L    | BET1L    | -        |
| hsa-miR-345 | BICD2    | BICD2    | -        |
| hsa-miR-345 | BIRC6    | BIRC6    | -        |
| hsa-miR-345 | BLCAP    | BLCAP    | -        |
| hsa-miR-345 | BLK      | BLK      | -        |
| hsa-miR-345 | BLMH     | BLMH     | -        |
| hsa-miR-345 | BMP2K    | BMP2K    | -        |
| hsa-miR-345 | BMPER    | BMPER    | -        |
| hsa-miR-345 | BNIPL    | BNIPL    | -        |
| hsa-miR-345 | BPTF     | BPTF     | -        |
| hsa-miR-345 | BRAF     | BRAF     | -        |
| hsa-miR-345 | BRCA1    | BRCA1    | -        |
| hsa-miR-345 | BRD2     | BRD2     | -        |
| hsa-miR-345 | BRI3BP   | BRI3BP   | -        |
| hsa-miR-345 | BRWD1    | BRWD1    | -        |
| hsa-miR-345 | BTF3L4   | BTF3L4   | -        |
| hsa-miR-345 | BTN2A2   | BTN2A2   | -        |
| hsa-miR-345 | BTNL3    | -        | BTNL3    |
| hsa-miR-345 | BTNL8    | -        | BTNL8    |
| hsa-miR-345 | BUB3     | BUB3     | -        |
| hsa-miR-345 | BVES     | BVES     | -        |
| hsa-miR-345 | -        | BZW2     | BZW2     |
| hsa-miR-345 | C10orf2  | C10orf2  | -        |
| hsa-miR-345 | C11orf16 | -        | C11orf16 |
| hsa-miR-345 | C11orf52 | C11orf52 | -        |
| hsa-miR-345 | C11orf61 | -        | C11orf61 |
| hsa-miR-345 | C11orf87 | C11orf87 | -        |
| hsa-miR-345 | C11orf9  | -        | C11orf9  |

|             |           |           |           |
|-------------|-----------|-----------|-----------|
| hsa-miR-345 | C12orf4   | C12orf4   | -         |
| hsa-miR-345 | C12orf51  | -         | C12orf51  |
| hsa-miR-345 | C12orf53  | -         | C12orf53  |
| hsa-miR-345 | C12orf66  | C12orf66  | -         |
| hsa-miR-345 | C13orf30  | C13orf30  | -         |
| hsa-miR-345 | C13orf31  | C13orf31  | -         |
| hsa-miR-345 | C14orf119 | C14orf119 | -         |
| hsa-miR-345 | C14orf129 | C14orf129 | -         |
| hsa-miR-345 | C14orf28  | C14orf28  | -         |
| hsa-miR-345 | C15orf42  | -         | C15orf42  |
| hsa-miR-345 | C16orf5   | C16orf5   | -         |
| hsa-miR-345 | C16orf53  | C16orf53  | -         |
| hsa-miR-345 | C16orf54  | C16orf54  | -         |
| hsa-miR-345 | C16orf55  | C16orf55  | -         |
| hsa-miR-345 | C16orf70  | C16orf70  | -         |
| hsa-miR-345 | C17orf39  | C17orf39  | -         |
| hsa-miR-345 | C17orf63  | C17orf63  | -         |
| hsa-miR-345 | C17orf82  | -         | C17orf82  |
| hsa-miR-345 | C17orf96  | C17orf96  | -         |
| hsa-miR-345 | C18orf1   | C18orf1   | -         |
| hsa-miR-345 | C18orf10  | C18orf10  | -         |
| hsa-miR-345 | C18orf32  | C18orf32  | -         |
| hsa-miR-345 | -         | C19orf34  | C19orf34  |
| hsa-miR-345 | C1QTNF7   | C1QTNF7   | -         |
| hsa-miR-345 | C1RL      | C1RL      | -         |
| hsa-miR-345 | C1orf115  | C1orf115  | -         |
| hsa-miR-345 | C1orf130  | C1orf130  | -         |
| hsa-miR-345 | C1orf144  | C1orf144  | -         |
| hsa-miR-345 | C1orf174  | C1orf174  | -         |
| hsa-miR-345 | C1orf183  | C1orf183  | -         |
| hsa-miR-345 | C1orf93   | C1orf93   | -         |
| hsa-miR-345 | C20orf108 | C20orf108 | -         |
| hsa-miR-345 | C20orf132 | C20orf132 | -         |
| hsa-miR-345 | C20orf134 | -         | C20orf134 |
| hsa-miR-345 | C20orf202 | C20orf202 | -         |
| hsa-miR-345 | C21orf33  | -         | C21orf33  |
| hsa-miR-345 | C21orf7   | C21orf7   | -         |
| hsa-miR-345 | C22orf46  | C22orf46  | -         |
| hsa-miR-345 | C2orf63   | C2orf63   | -         |
| hsa-miR-345 | C3orf45   | C3orf45   | -         |
| hsa-miR-345 | C3orf62   | C3orf62   | -         |
| hsa-miR-345 | C3orf67   | C3orf67   | -         |
| hsa-miR-345 | C3orf70   | C3orf70   | -         |
| hsa-miR-345 | C4orf41   | C4orf41   | -         |
| hsa-miR-345 | C5orf44   | C5orf44   | -         |
| hsa-miR-345 | C6orf15   | -         | C6orf15   |
| hsa-miR-345 | C6orf154  | -         | C6orf154  |
| hsa-miR-345 | C6orf162  | C6orf162  | -         |
| hsa-miR-345 | C6orf222  | C6orf222  | -         |
| hsa-miR-345 | C6orf26   | C6orf26   | -         |
| hsa-miR-345 | -         | C7orf26   | C7orf26   |

|             |           |           |         |
|-------------|-----------|-----------|---------|
| hsa-miR-345 | C7orf28B  | C7orf28B  | -       |
| hsa-miR-345 | C7orf51   | C7orf51   | -       |
| hsa-miR-345 | C7orf61   | C7orf61   | -       |
| hsa-miR-345 | C7orf63   | C7orf63   | -       |
| hsa-miR-345 | C8orf31   | C8orf31   | -       |
| hsa-miR-345 | C8orf44   | C8orf44   | -       |
| hsa-miR-345 | C8orf86   | C8orf86   | -       |
| hsa-miR-345 | C9orf25   | -         | C9orf25 |
| hsa-miR-345 | C9orf3    | C9orf3    | -       |
| hsa-miR-345 | C9orf37   | -         | C9orf37 |
| hsa-miR-345 | C9orf5    | C9orf5    | -       |
| hsa-miR-345 | C9orf95   | C9orf95   | -       |
| hsa-miR-345 | CABLES1   | -         | CABLES1 |
| hsa-miR-345 | CACNA1D   | CACNA1D   | -       |
| hsa-miR-345 | CACNA2D4  | CACNA2D4  | -       |
| hsa-miR-345 | CACNB4    | CACNB4    | -       |
| hsa-miR-345 | CADM1     | CADM1     | -       |
| hsa-miR-345 | CALB1     | CALB1     | -       |
| hsa-miR-345 | CAMKK2    | -         | CAMKK2  |
| hsa-miR-345 | CAMSAP1   | CAMSAP1   | -       |
| hsa-miR-345 | CAPN6     | CAPN6     | -       |
| hsa-miR-345 | CAPZA2    | CAPZA2    | -       |
| hsa-miR-345 | CARD8     | CARD8     | -       |
| hsa-miR-345 | CASS4     | CASS4     | -       |
| hsa-miR-345 | CBFA2T2   | CBFA2T2   | -       |
| hsa-miR-345 | CBLL1     | CBLL1     | -       |
| hsa-miR-345 | CBX6      | CBX6      | -       |
| hsa-miR-345 | CBX7      | CBX7      | -       |
| hsa-miR-345 | CCDC112   | CCDC112   | -       |
| hsa-miR-345 | CCDC124   | -         | CCDC124 |
| hsa-miR-345 | CCDC125   | CCDC125   | -       |
| hsa-miR-345 | CCDC134   | -         | CCDC134 |
| hsa-miR-345 | CCDC136   | CCDC136   | -       |
| hsa-miR-345 | CCDC144NL | CCDC144NL | -       |
| hsa-miR-345 | CCDC152   | CCDC152   | -       |
| hsa-miR-345 | CCDC155   | CCDC155   | -       |
| hsa-miR-345 | CCDC33    | -         | CCDC33  |
| hsa-miR-345 | CCDC62    | CCDC62    | -       |
| hsa-miR-345 | CCDC64    | CCDC64    | -       |
| hsa-miR-345 | CCDC75    | CCDC75    | -       |
| hsa-miR-345 | CCDC88B   | CCDC88B   | -       |
| hsa-miR-345 | CCDC88C   | CCDC88C   | -       |
| hsa-miR-345 | CCL19     | -         | CCL19   |
| hsa-miR-345 | CCNG1     | CCNG1     | -       |
| hsa-miR-345 | CCNJL     | CCNJL     | -       |
| hsa-miR-345 | CCR4      | CCR4      | -       |
| hsa-miR-345 | CCR5      | CCR5      | -       |
| hsa-miR-345 | CCT6A     | CCT6A     | -       |
| hsa-miR-345 | CD109     | CD109     | -       |
| hsa-miR-345 | CD2BP2    | CD2BP2    | -       |
| hsa-miR-345 | CD300LD   | CD300LD   | -       |

|             |          |          |          |
|-------------|----------|----------|----------|
| hsa-miR-345 | CD300LG  | -        | CD300LG  |
| hsa-miR-345 | CD34     | -        | CD34     |
| hsa-miR-345 | CD40LG   | CD40LG   | -        |
| hsa-miR-345 | CD5      | CD5      | -        |
| hsa-miR-345 | CD93     | CD93     | -        |
| hsa-miR-345 | CDADC1   | CDADC1   | -        |
| hsa-miR-345 | CDC25B   | -        | CDC25B   |
| hsa-miR-345 | CDC42EP2 | -        | CDC42EP2 |
| hsa-miR-345 | CDC42EP3 | CDC42EP3 | -        |
| hsa-miR-345 | CDC42SE2 | CDC42SE2 | -        |
| hsa-miR-345 | CDC73    | CDC73    | -        |
| hsa-miR-345 | CDCA8    | CDCA8    | -        |
| hsa-miR-345 | CDH19    | CDH19    | -        |
| hsa-miR-345 | CDH6     | CDH6     | -        |
| hsa-miR-345 | CDHR3    | CDHR3    | -        |
| hsa-miR-345 | CDKAL1   | CDKAL1   | -        |
| hsa-miR-345 | CDS1     | CDS1     | -        |
| hsa-miR-345 | CDS2     | CDS2     | -        |
| hsa-miR-345 | CDV3     | CDV3     | -        |
| hsa-miR-345 | CEACAM3  | -        | CEACAM3  |
| hsa-miR-345 | CEACAM7  | CEACAM7  | -        |
| hsa-miR-345 | CEACAM8  | CEACAM8  | -        |
| hsa-miR-345 | CELF2    | CELF2    | -        |
| hsa-miR-345 | CELF3    | CELF3    | -        |
| hsa-miR-345 | CENPN    | CENPN    | -        |
| hsa-miR-345 | CEP57    | CEP57    | -        |
| hsa-miR-345 | CERKL    | CERKL    | -        |
| hsa-miR-345 | CFLAR    | CFLAR    | -        |
| hsa-miR-345 | CHD2     | CHD2     | -        |
| hsa-miR-345 | CHMP1B   | CHMP1B   | -        |
| hsa-miR-345 | CHMP4C   | CHMP4C   | -        |
| hsa-miR-345 | CHP      | CHP      | -        |
| hsa-miR-345 | CHP2     | CHP2     | -        |
| hsa-miR-345 | CHRDL1   | CHRDL1   | -        |
| hsa-miR-345 | CHRNA1   | CHRNA1   | -        |
| hsa-miR-345 | CHRNE    | -        | CHRNE    |
| hsa-miR-345 | CHST2    | CHST2    | -        |
| hsa-miR-345 | CLCN6    | -        | CLCN6    |
| hsa-miR-345 | CLDN18   | CLDN18   | -        |
| hsa-miR-345 | CLEC2D   | CLEC2D   | -        |
| hsa-miR-345 | CLEC7A   | CLEC7A   | -        |
| hsa-miR-345 | CLINT1   | CLINT1   | -        |
| hsa-miR-345 | -        | CMTM1    | CMTM1    |
| hsa-miR-345 | CNBP     | CNBP     | -        |
| hsa-miR-345 | CNGA3    | CNGA3    | -        |
| hsa-miR-345 | CNGB1    | CNGB1    | -        |
| hsa-miR-345 | CNOT1    | -        | CNOT1    |
| hsa-miR-345 | -        | CNOT10   | CNOT10   |
| hsa-miR-345 | CNOT7    | CNOT7    | -        |
| hsa-miR-345 | CNTLN    | CNTLN    | -        |
| hsa-miR-345 | CNTNAP3B | CNTNAP3B | -        |



|             |           |           |          |
|-------------|-----------|-----------|----------|
| hsa-miR-345 | COG3      | COG3      | -        |
| hsa-miR-345 | COL1A1    | COL1A1    | -        |
| hsa-miR-345 | COL6A2    | -         | COL6A2   |
| hsa-miR-345 | COPZ1     | COPZ1     | -        |
| hsa-miR-345 | CORO2A    | CORO2A    | -        |
| hsa-miR-345 | CORO7     | -         | CORO7    |
| hsa-miR-345 | CPA4      | CPA4      | -        |
| hsa-miR-345 | CPEB3     | CPEB3     | -        |
| hsa-miR-345 | CRB3      | CRB3      | -        |
| hsa-miR-345 | CREB1     | CREB1     | -        |
| hsa-miR-345 | CREBL2    | CREBL2    | -        |
| hsa-miR-345 | CRIM1     | CRIM1     | -        |
| hsa-miR-345 | CRISPLD2  | CRISPLD2  | -        |
| hsa-miR-345 | CRMP1     | CRMP1     | -        |
| hsa-miR-345 | CROCC     | -         | CROCC    |
| hsa-miR-345 | CRTAM     | CRTAM     | -        |
| hsa-miR-345 | CSMD2     | CSMD2     | -        |
| hsa-miR-345 | CSRP2BP   | CSRP2BP   | -        |
| hsa-miR-345 | CSTF2T    | CSTF2T    | -        |
| hsa-miR-345 | CTCFL     | CTCFL     | -        |
| hsa-miR-345 | CTNNAL1   | -         | CTNNAL1  |
| hsa-miR-345 | CTTNBP2NL | CTTNBP2NL | -        |
| hsa-miR-345 | CTXN2     | CTXN2     | -        |
| hsa-miR-345 | CUL7      | -         | CUL7     |
| hsa-miR-345 | CUX2      | CUX2      | -        |
| hsa-miR-345 | CWC25     | CWC25     | -        |
| hsa-miR-345 | CXADR     | CXADR     | -        |
| hsa-miR-345 | CXCR5     | CXCR5     | -        |
| hsa-miR-345 | CXorf36   | CXorf36   | -        |
| hsa-miR-345 | CYB561    | CYB561    | -        |
| hsa-miR-345 | CYB561D2  | -         | CYB561D2 |
| hsa-miR-345 | CYB5D1    | CYB5D1    | -        |
| hsa-miR-345 | CYBB      | CYBB      | -        |
| hsa-miR-345 | CYP2A7    | -         | CYP2A7   |
| hsa-miR-345 | CYP2B6    | CYP2B6    | -        |
| hsa-miR-345 | CYYR1     | CYYR1     | -        |
| hsa-miR-345 | DAPK1     | DAPK1     | -        |
| hsa-miR-345 | DAPP1     | DAPP1     | -        |
| hsa-miR-345 | DARS2     | DARS2     | -        |
| hsa-miR-345 | DAZ1      | DAZ1      | -        |
| hsa-miR-345 | DAZ2      | DAZ2      | -        |
| hsa-miR-345 | DAZ3      | DAZ3      | -        |
| hsa-miR-345 | DAZ4      | DAZ4      | -        |
| hsa-miR-345 | DBF4B     | DBF4B     | -        |
| hsa-miR-345 | DBNDD1    | -         | DBNDD1   |
| hsa-miR-345 | DCAF5     | DCAF5     | -        |
| hsa-miR-345 | DCLK3     | DCLK3     | -        |
| hsa-miR-345 | DCP1A     | DCP1A     | -        |
| hsa-miR-345 | DDHD2     | DDHD2     | -        |
| hsa-miR-345 | DDX3X     | DDX3X     | -        |
| hsa-miR-345 | DDX46     | DDX46     | -        |

|             |         |         |        |
|-------------|---------|---------|--------|
| hsa-miR-345 | DDX5    | DDX5    | -      |
| hsa-miR-345 | DDX52   | DDX52   | -      |
| hsa-miR-345 | DDX59   | DDX59   | -      |
| hsa-miR-345 | DENND1A | DENND1A | -      |
| hsa-miR-345 | DENND2C | DENND2C | -      |
| hsa-miR-345 | DENND5A | DENND5A | -      |
| hsa-miR-345 | DEPDC5  | -       | DEPDC5 |
| hsa-miR-345 | DERL1   | DERL1   | -      |
| hsa-miR-345 | DIRC2   | DIRC2   | -      |
| hsa-miR-345 | DIS3L2  | DIS3L2  | -      |
| hsa-miR-345 | DLAT    | DLAT    | -      |
| hsa-miR-345 | DLD     | DLD     | -      |
| hsa-miR-345 | DLG1    | DLG1    | -      |
| hsa-miR-345 | DMC1    | DMC1    | -      |
| hsa-miR-345 | DMWD    | DMWD    | -      |
| hsa-miR-345 | DNAH11  | DNAH11  | -      |
| hsa-miR-345 | DNAI2   | -       | DNAI2  |
| hsa-miR-345 | DNAJB4  | DNAJB4  | -      |
| hsa-miR-345 | DNAJC16 | DNAJC16 | -      |
| hsa-miR-345 | DNAJC24 | DNAJC24 | -      |
| hsa-miR-345 | DNAJC3  | DNAJC3  | -      |
| hsa-miR-345 | DND1    | -       | DND1   |
| hsa-miR-345 | DNHD1   | DNHD1   | -      |
| hsa-miR-345 | DNMT3A  | DNMT3A  | -      |
| hsa-miR-345 | DOCK4   | DOCK4   | -      |
| hsa-miR-345 | DOCK5   | DOCK5   | -      |
| hsa-miR-345 | DOK1    | DOK1    | -      |
| hsa-miR-345 | DPYSL3  | DPYSL3  | -      |
| hsa-miR-345 | DTNBP1  | DTNBP1  | -      |
| hsa-miR-345 | DTX1    | DTX1    | -      |
| hsa-miR-345 | DTX2    | -       | DTX2   |
| hsa-miR-345 | DUSP11  | DUSP11  | -      |
| hsa-miR-345 | DUSP14  | DUSP14  | -      |
| hsa-miR-345 | DUSP16  | DUSP16  | -      |
| hsa-miR-345 | DYNLT1  | -       | DYNLT1 |
| hsa-miR-345 | E2F3    | E2F3    | -      |
| hsa-miR-345 | EBF3    | EBF3    | -      |
| hsa-miR-345 | ECM1    | -       | ECM1   |
| hsa-miR-345 | EDA     | EDA     | -      |
| hsa-miR-345 | EDC4    | -       | EDC4   |
| hsa-miR-345 | EDEM3   | EDEM3   | -      |
| hsa-miR-345 | EEF1A1  | EEF1A1  | -      |
| hsa-miR-345 | EFR3B   | EFR3B   | -      |
| hsa-miR-345 | EHBP1   | EHBP1   | -      |
| hsa-miR-345 | EIF2B1  | EIF2B1  | -      |
| hsa-miR-345 | ELAVL1  | ELAVL1  | -      |
| hsa-miR-345 | ELF1    | ELF1    | -      |
| hsa-miR-345 | ELF2    | ELF2    | -      |
| hsa-miR-345 | ELK4    | -       | ELK4   |
| hsa-miR-345 | ELL3    | ELL3    | -      |
| hsa-miR-345 | ELMOD3  | ELMOD3  | -      |

|             |          |          |         |
|-------------|----------|----------|---------|
| hsa-miR-345 | ELOVL4   | ELOVL4   | -       |
| hsa-miR-345 | ENHO     | ENHO     | -       |
| hsa-miR-345 | ENPP5    | ENPP5    | -       |
| hsa-miR-345 | ENSA     | -        | ENSA    |
| hsa-miR-345 | ENTPD3   | -        | ENTPD3  |
| hsa-miR-345 | EPB41L2  | EPB41L2  | -       |
| hsa-miR-345 | EPHA5    | EPHA5    | -       |
| hsa-miR-345 | EPHA6    | EPHA6    | -       |
| hsa-miR-345 | EPN3     | EPN3     | -       |
| hsa-miR-345 | EPOR     | -        | EPOR    |
| hsa-miR-345 | EPS8     | EPS8     | -       |
| hsa-miR-345 | EPT1     | EPT1     | -       |
| hsa-miR-345 | ERBB3    | ERBB3    | -       |
| hsa-miR-345 | ERCC4    | ERCC4    | -       |
| hsa-miR-345 | ERG      | ERG      | -       |
| hsa-miR-345 | ERGIC1   | ERGIC1   | -       |
| hsa-miR-345 | ERGIC3   | ERGIC3   | -       |
| hsa-miR-345 | ERLIN1   | ERLIN1   | -       |
| hsa-miR-345 | ERLIN2   | ERLIN2   | -       |
| hsa-miR-345 | ERMAP    | ERMAP    | -       |
| hsa-miR-345 | ESRRG    | ESRRG    | -       |
| hsa-miR-345 | ETV6     | ETV6     | -       |
| hsa-miR-345 | EXD2     | EXD2     | -       |
| hsa-miR-345 | EXOSC1   | EXOSC1   | -       |
| hsa-miR-345 | EXTL2    | EXTL2    | -       |
| hsa-miR-345 | EYS      | EYS      | -       |
| hsa-miR-345 | EZH2     | EZH2     | -       |
| hsa-miR-345 | EZR      | EZR      | -       |
| hsa-miR-345 | F11R     | F11R     | -       |
| hsa-miR-345 | FADS1    | -        | FADS1   |
| hsa-miR-345 | FAF2     | FAF2     | -       |
| hsa-miR-345 | FAM102A  | -        | FAM102A |
| hsa-miR-345 | FAM103A1 | FAM103A1 | -       |
| hsa-miR-345 | FAM107B  | FAM107B  | -       |
| hsa-miR-345 | FAM109B  | FAM109B  | -       |
| hsa-miR-345 | FAM118A  | FAM118A  | -       |
| hsa-miR-345 | FAM120B  | FAM120B  | -       |
| hsa-miR-345 | FAM133B  | FAM133B  | -       |
| hsa-miR-345 | FAM136A  | FAM136A  | -       |
| hsa-miR-345 | FAM13A   | FAM13A   | -       |
| hsa-miR-345 | FAM155B  | FAM155B  | -       |
| hsa-miR-345 | FAM168A  | FAM168A  | -       |
| hsa-miR-345 | FAM169A  | FAM169A  | -       |
| hsa-miR-345 | FAM175A  | FAM175A  | -       |
| hsa-miR-345 | FAM178A  | FAM178A  | -       |
| hsa-miR-345 | FAM18A   | FAM18A   | -       |
| hsa-miR-345 | FAM190B  | FAM190B  | -       |
| hsa-miR-345 | FAM19A2  | FAM19A2  | -       |
| hsa-miR-345 | FAM46A   | FAM46A   | -       |
| hsa-miR-345 | FAM47C   | FAM47C   | -       |
| hsa-miR-345 | FAM53C   | FAM53C   | -       |

|             |           |           |         |
|-------------|-----------|-----------|---------|
| hsa-miR-345 | FAM57A    | -         | FAM57A  |
| hsa-miR-345 | FAM83C    | -         | FAM83C  |
| hsa-miR-345 | FAM83F    | -         | FAM83F  |
| hsa-miR-345 | FAM90A1   | FAM90A1   | -       |
| hsa-miR-345 | FAM90A7   | FAM90A7   | -       |
| hsa-miR-345 | FAM98A    | FAM98A    | -       |
| hsa-miR-345 | FANCC     | FANCC     | -       |
| hsa-miR-345 | FANCD2    | FANCD2    | -       |
| hsa-miR-345 | FAP       | FAP       | -       |
| hsa-miR-345 | FAT3      | FAT3      | -       |
| hsa-miR-345 | FBL       | FBL       | -       |
| hsa-miR-345 | FBLN1     | FBLN1     | -       |
| hsa-miR-345 | FBXO3     | FBXO3     | -       |
| hsa-miR-345 | FBXO31    | FBXO31    | -       |
| hsa-miR-345 | FBXO6     | FBXO6     | -       |
| hsa-miR-345 | FCHO2     | FCHO2     | -       |
| hsa-miR-345 | FCN2      | -         | FCN2    |
| hsa-miR-345 | FFAR3     | -         | FFAR3   |
| hsa-miR-345 | FGD4      | FGD4      | -       |
| hsa-miR-345 | FGF1      | FGF1      | -       |
| hsa-miR-345 | FIBCD1    | -         | FIBCD1  |
| hsa-miR-345 | FIGN      | FIGN      | -       |
| hsa-miR-345 | FILIP1    | FILIP1    | -       |
| hsa-miR-345 | FLG2      | FLG2      | -       |
| hsa-miR-345 | FLT4      | -         | FLT4    |
| hsa-miR-345 | FLVCR2    | FLVCR2    | -       |
| hsa-miR-345 | FMO5      | FMO5      | -       |
| hsa-miR-345 | FMOD      | FMOD      | -       |
| hsa-miR-345 | FNIP1     | FNIP1     | -       |
| hsa-miR-345 | FNTB      | FNTB      | -       |
| hsa-miR-345 | FOXJ2     | FOXJ2     | -       |
| hsa-miR-345 | FOXP1     | FOXP1     | -       |
| hsa-miR-345 | FOXP2     | FOXP2     | -       |
| hsa-miR-345 | FRMD4A    | FRMD4A    | -       |
| hsa-miR-345 | FUT3      | FUT3      | -       |
| hsa-miR-345 | G3BP2     | G3BP2     | -       |
| hsa-miR-345 | GAB2      | GAB2      | -       |
| hsa-miR-345 | GABARAPL2 | GABARAPL2 | -       |
| hsa-miR-345 | GABRG2    | GABRG2    | -       |
| hsa-miR-345 | GALNT10   | -         | GALNT10 |
| hsa-miR-345 | GALNTL6   | GALNTL6   | -       |
| hsa-miR-345 | GALR1     | GALR1     | -       |
| hsa-miR-345 | GAN       | GAN       | -       |
| hsa-miR-345 | GAS2L2    | -         | GAS2L2  |
| hsa-miR-345 | GATS      | GATS      | -       |
| hsa-miR-345 | GBA       | GBA       | -       |
| hsa-miR-345 | GCNT2     | GCNT2     | -       |
| hsa-miR-345 | GDAP2     | GDAP2     | -       |
| hsa-miR-345 | GEMIN7    | GEMIN7    | -       |
| hsa-miR-345 | GFM1      | GFM1      | -       |
| hsa-miR-345 | GFRA2     | GFRA2     | -       |

|             |         |         |        |
|-------------|---------|---------|--------|
| hsa-miR-345 | GGT6    | GGT6    | -      |
| hsa-miR-345 | GGT7    | GGT7    | -      |
| hsa-miR-345 | GJA4    | GJA4    | -      |
| hsa-miR-345 | GJB7    | GJB7    | -      |
| hsa-miR-345 | GKN2    | GKN2    | -      |
| hsa-miR-345 | GLCE    | GLCE    | -      |
| hsa-miR-345 | GLT25D2 | GLT25D2 | -      |
| hsa-miR-345 | GLT8D1  | -       | GLT8D1 |
| hsa-miR-345 | GLUD1   | GLUD1   | -      |
| hsa-miR-345 | GMEB1   | -       | GMEB1  |
| hsa-miR-345 | GMEB2   | GMEB2   | -      |
| hsa-miR-345 | GNA12   | GNA12   | -      |
| hsa-miR-345 | GNB1    | GNB1    | -      |
| hsa-miR-345 | GOLGA6A | GOLGA6A | -      |
| hsa-miR-345 | GOLGA6B | GOLGA6B | -      |
| hsa-miR-345 | GOLGA6D | GOLGA6D | -      |
| hsa-miR-345 | GOLGA8A | GOLGA8A | -      |
| hsa-miR-345 | GPBP1   | GPBP1   | -      |
| hsa-miR-345 | GPBP1L1 | GPBP1L1 | -      |
| hsa-miR-345 | GPR107  | GPR107  | -      |
| hsa-miR-345 | GPR112  | GPR112  | -      |
| hsa-miR-345 | GPR12   | GPR12   | -      |
| hsa-miR-345 | GPR132  | GPR132  | -      |
| hsa-miR-345 | GPR35   | GPR35   | -      |
| hsa-miR-345 | GPR39   | GPR39   | -      |
| hsa-miR-345 | GPR44   | -       | GPR44  |
| hsa-miR-345 | GPR45   | GPR45   | -      |
| hsa-miR-345 | GPR55   | GPR55   | -      |
| hsa-miR-345 | GPR56   | GPR56   | -      |
| hsa-miR-345 | GPR83   | GPR83   | -      |
| hsa-miR-345 | GPR97   | -       | GPR97  |
| hsa-miR-345 | GPRASP1 | GPRASP1 | -      |
| hsa-miR-345 | GPX8    | GPX8    | -      |
| hsa-miR-345 | GRAPL   | GRAPL   | -      |
| hsa-miR-345 | GREM1   | GREM1   | -      |
| hsa-miR-345 | GRHL1   | GRHL1   | -      |
| hsa-miR-345 | GRIA3   | GRIA3   | -      |
| hsa-miR-345 | GRIP1   | GRIP1   | -      |
| hsa-miR-345 | GRIP2   | GRIP2   | -      |
| hsa-miR-345 | -       | GRTP1   | GRTP1  |
| hsa-miR-345 | GSC     | -       | GSC    |
| hsa-miR-345 | GTF2I   | GTF2I   | -      |
| hsa-miR-345 | GTF3C2  | GTF3C2  | -      |
| hsa-miR-345 | GUSB    | -       | GUSB   |
| hsa-miR-345 | GYG2    | GYG2    | -      |
| hsa-miR-345 | GYPE    | GYPE    | -      |
| hsa-miR-345 | H1F0    | H1F0    | -      |
| hsa-miR-345 | H2AFJ   | H2AFJ   | -      |
| hsa-miR-345 | H2AFV   | H2AFV   | -      |
| hsa-miR-345 | HABP4   | HABP4   | -      |
| hsa-miR-345 | HAUS3   | HAUS3   | -      |

|             |         |         |        |
|-------------|---------|---------|--------|
| hsa-miR-345 | HCP5    | HCP5    | -      |
| hsa-miR-345 | HDAC4   | -       | HDAC4  |
| hsa-miR-345 | HDGF    | HDGF    | -      |
| hsa-miR-345 | HELZ    | HELZ    | -      |
| hsa-miR-345 | HEY2    | HEY2    | -      |
| hsa-miR-345 | HFE2    | HFE2    | -      |
| hsa-miR-345 | HIAT1   | HIAT1   | -      |
| hsa-miR-345 | HIF1AN  | -       | HIF1AN |
| hsa-miR-345 | HIP1R   | -       | HIP1R  |
| hsa-miR-345 | HKR1    | -       | HKR1   |
| hsa-miR-345 | HLA-E   | -       | HLA-E  |
| hsa-miR-345 | HNF1B   | HNF1B   | -      |
| hsa-miR-345 | HNRNPD  | HNRNPD  | -      |
| hsa-miR-345 | HOXD1   | HOXD1   | -      |
| hsa-miR-345 | HOXD3   | HOXD3   | -      |
| hsa-miR-345 | HPS5    | HPS5    | -      |
| hsa-miR-345 | HS3ST5  | HS3ST5  | -      |
| hsa-miR-345 | HSF2BP  | HSF2BP  | -      |
| hsa-miR-345 | HSPA12A | HSPA12A | -      |
| hsa-miR-345 | HSPG2   | -       | HSPG2  |
| hsa-miR-345 | HTATIP2 | HTATIP2 | -      |
| hsa-miR-345 | HTR2C   | HTR2C   | -      |
| hsa-miR-345 | HTRA1   | HTRA1   | -      |
| hsa-miR-345 | HUWE1   | HUWE1   | -      |
| hsa-miR-345 | HYAL3   | HYAL3   | -      |
| hsa-miR-345 | HYOU1   | HYOU1   | -      |
| hsa-miR-345 | IAPP    | IAPP    | -      |
| hsa-miR-345 | IDS     | IDS     | -      |
| hsa-miR-345 | IFIT2   | IFIT2   | -      |
| hsa-miR-345 | IFNAR1  | IFNAR1  | -      |
| hsa-miR-345 | IFNK    | -       | IFNK   |
| hsa-miR-345 | IGFBP4  | IGFBP4  | -      |
| hsa-miR-345 | IGSF3   | IGSF3   | -      |
| hsa-miR-345 | IKZF1   | IKZF1   | -      |
| hsa-miR-345 | IKZF2   | IKZF2   | -      |
| hsa-miR-345 | -       | IL11RA  | IL11RA |
| hsa-miR-345 | IL5     | IL5     | -      |
| hsa-miR-345 | IL6ST   | IL6ST   | -      |
| hsa-miR-345 | ILVBL   | -       | ILVBL  |
| hsa-miR-345 | INADL   | INADL   | -      |
| hsa-miR-345 | INHBB   | INHBB   | -      |
| hsa-miR-345 | INO80   | INO80   | -      |
| hsa-miR-345 | INTS2   | INTS2   | -      |
| hsa-miR-345 | INTS6   | INTS6   | -      |
| hsa-miR-345 | IP6K2   | IP6K2   | -      |
| hsa-miR-345 | IP6K3   | IP6K3   | -      |
| hsa-miR-345 | IPCEF1  | IPCEF1  | -      |
| hsa-miR-345 | IRAK4   | IRAK4   | -      |
| hsa-miR-345 | IRF1    | -       | IRF1   |
| hsa-miR-345 | IRF4    | IRF4    | -      |
| hsa-miR-345 | IRF5    | -       | IRF5   |

|             |          |          |          |
|-------------|----------|----------|----------|
| hsa-miR-345 | IRF8     | IRF8     | -        |
| hsa-miR-345 | IRX2     | IRX2     | -        |
| hsa-miR-345 | ISCU     | ISCU     | -        |
| hsa-miR-345 | ISM1     | ISM1     | -        |
| hsa-miR-345 | ISPD     | ISPD     | -        |
| hsa-miR-345 | ITFG2    | ITFG2    | -        |
| hsa-miR-345 | ITIH5L   | ITIH5L   | -        |
| hsa-miR-345 | ITM2A    | ITM2A    | -        |
| hsa-miR-345 | ITPKC    | ITPKC    | -        |
| hsa-miR-345 | ITPR2    | ITPR2    | -        |
| hsa-miR-345 | ITPRIPL2 | ITPRIPL2 | -        |
| hsa-miR-345 | JAGN1    | -        | JAGN1    |
| hsa-miR-345 | JAK3     | JAK3     | -        |
| hsa-miR-345 | JARID2   | JARID2   | -        |
| hsa-miR-345 | JMJD4    | JMJD4    | -        |
| hsa-miR-345 | KALRN    | KALRN    | -        |
| hsa-miR-345 | KANK4    | KANK4    | -        |
| hsa-miR-345 | KAZALD1  | KAZALD1  | -        |
| hsa-miR-345 | KCNA5    | KCNA5    | -        |
| hsa-miR-345 | KCND1    | -        | KCND1    |
| hsa-miR-345 | KCNE1    | KCNE1    | -        |
| hsa-miR-345 | KCNE3    | KCNE3    | -        |
| hsa-miR-345 | KCNG3    | KCNG3    | -        |
| hsa-miR-345 | KCNH4    | -        | KCNH4    |
| hsa-miR-345 | KCNIP2   | -        | KCNIP2   |
| hsa-miR-345 | KCNK2    | KCNK2    | -        |
| hsa-miR-345 | KCNN1    | KCNN1    | -        |
| hsa-miR-345 | KCNS2    | KCNS2    | -        |
| hsa-miR-345 | KCTD11   | KCTD11   | -        |
| hsa-miR-345 | KCTD21   | KCTD21   | -        |
| hsa-miR-345 | KDM2B    | KDM2B    | -        |
| hsa-miR-345 | KDM4C    | KDM4C    | -        |
| hsa-miR-345 | KIAA0090 | -        | KIAA0090 |
| hsa-miR-345 | KIAA0141 | KIAA0141 | -        |
| hsa-miR-345 | KIAA0182 | KIAA0182 | -        |
| hsa-miR-345 | KIAA0240 | KIAA0240 | -        |
| hsa-miR-345 | KIAA0368 | KIAA0368 | -        |
| hsa-miR-345 | KIAA0430 | KIAA0430 | -        |
| hsa-miR-345 | KIAA0664 | -        | KIAA0664 |
| hsa-miR-345 | KIAA0895 | KIAA0895 | -        |
| hsa-miR-345 | KIAA1024 | KIAA1024 | -        |
| hsa-miR-345 | KIAA1033 | KIAA1033 | -        |
| hsa-miR-345 | KIAA1244 | KIAA1244 | -        |
| hsa-miR-345 | KIAA1324 | KIAA1324 | -        |
| hsa-miR-345 | KIAA1328 | KIAA1328 | -        |
| hsa-miR-345 | KIAA1383 | KIAA1383 | -        |
| hsa-miR-345 | KIAA1543 | KIAA1543 | -        |
| hsa-miR-345 | KIAA1549 | KIAA1549 | -        |
| hsa-miR-345 | KIF14    | KIF14    | -        |
| hsa-miR-345 | KIF20A   | -        | KIF20A   |
| hsa-miR-345 | KIF2C    | -        | KIF2C    |

|             |            |            |        |
|-------------|------------|------------|--------|
| hsa-miR-345 | KISS1      | -          | KISS1  |
| hsa-miR-345 | KITLG      | KITLG      | -      |
| hsa-miR-345 | KLF10      | KLF10      | -      |
| hsa-miR-345 | KLF6       | KLF6       | -      |
| hsa-miR-345 | KLF9       | KLF9       | -      |
| hsa-miR-345 | KLHDC5     | KLHDC5     | -      |
| hsa-miR-345 | KLHL28     | KLHL28     | -      |
| hsa-miR-345 | KRI1       | KRI1       | -      |
| hsa-miR-345 | KRT80      | -          | KRT80  |
| hsa-miR-345 | KRTAP10-11 | KRTAP10-11 | -      |
| hsa-miR-345 | KRTAP13-2  | KRTAP13-2  | -      |
| hsa-miR-345 | KRTAP5-2   | KRTAP5-2   | -      |
| hsa-miR-345 | KSR1       | KSR1       | -      |
| hsa-miR-345 | LAMB4      | LAMB4      | -      |
| hsa-miR-345 | LAMP2      | LAMP2      | -      |
| hsa-miR-345 | LARP1B     | LARP1B     | -      |
| hsa-miR-345 | LAT        | LAT        | -      |
| hsa-miR-345 | LAT2       | LAT2       | -      |
| hsa-miR-345 | LBR        | LBR        | -      |
| hsa-miR-345 | LCE1B      | LCE1B      | -      |
| hsa-miR-345 | LCP1       | LCP1       | -      |
| hsa-miR-345 | LDLRAD3    | LDLRAD3    | -      |
| hsa-miR-345 | LEPR       | LEPR       | -      |
| hsa-miR-345 | LFNG       | LFNG       | -      |
| hsa-miR-345 | LGSN       | LGSN       | -      |
| hsa-miR-345 | LHFPL4     | LHFPL4     | -      |
| hsa-miR-345 | LILRA3     | -          | LILRA3 |
| hsa-miR-345 | LIMS3      | LIMS3      | -      |
| hsa-miR-345 | LITAF      | LITAF      | -      |
| hsa-miR-345 | LMOD1      | LMOD1      | -      |
| hsa-miR-345 | LOC391322  | LOC391322  | -      |
| hsa-miR-345 | LONP2      | LONP2      | -      |
| hsa-miR-345 | LOXL2      | LOXL2      | -      |
| hsa-miR-345 | LPAR2      | LPAR2      | -      |
| hsa-miR-345 | LPHN1      | LPHN1      | -      |
| hsa-miR-345 | LPHN3      | LPHN3      | -      |
| hsa-miR-345 | LPIN2      | LPIN2      | -      |
| hsa-miR-345 | LPP        | LPP        | -      |
| hsa-miR-345 | LRAT       | LRAT       | -      |
| hsa-miR-345 | LRRC20     | LRRC20     | -      |
| hsa-miR-345 | LRRFIP1    | LRRFIP1    | -      |
| hsa-miR-345 | LRRTM3     | LRRTM3     | -      |
| hsa-miR-345 | LSM12      | LSM12      | -      |
| hsa-miR-345 | LSM14A     | LSM14A     | -      |
| hsa-miR-345 | LTBP2      | LTBP2      | -      |
| hsa-miR-345 | LYPD1      | -          | LYPD1  |
| hsa-miR-345 | LYRM7      | LYRM7      | -      |
| hsa-miR-345 | MAGEB3     | MAGEB3     | -      |
| hsa-miR-345 | MAGI1      | MAGI1      | -      |
| hsa-miR-345 | MAN2A2     | MAN2A2     | -      |
| hsa-miR-345 | MAN2B2     | -          | MAN2B2 |



|             |          |          |          |
|-------------|----------|----------|----------|
| hsa-miR-345 | MANBAL   | MANBAL   | -        |
| hsa-miR-345 | MANEAL   | MANEAL   | -        |
| hsa-miR-345 | MAP1LC3A | -        | MAP1LC3A |
| hsa-miR-345 | MAP3K1   | MAP3K1   | -        |
| hsa-miR-345 | MAP3K11  | -        | MAP3K11  |
| hsa-miR-345 | MAP3K14  | MAP3K14  | -        |
| hsa-miR-345 | MAP9     | MAP9     | -        |
| hsa-miR-345 | MAPK1    | MAPK1    | -        |
| hsa-miR-345 | MAPK11   | -        | MAPK11   |
| hsa-miR-345 | MAPK9    | MAPK9    | -        |
| hsa-miR-345 | MAPKAP1  | MAPKAP1  | -        |
| hsa-miR-345 | MARK1    | MARK1    | -        |
| hsa-miR-345 | MAT2B    | MAT2B    | -        |
| hsa-miR-345 | MATN1    | MATN1    | -        |
| hsa-miR-345 | MAZ      | MAZ      | -        |
| hsa-miR-345 | MBLAC1   | MBLAC1   | -        |
| hsa-miR-345 | MCF2L    | -        | MCF2L    |
| hsa-miR-345 | MCM5     | MCM5     | -        |
| hsa-miR-345 | MCM9     | MCM9     | -        |
| hsa-miR-345 | MDC1     | -        | MDC1     |
| hsa-miR-345 | MDM4     | MDM4     | -        |
| hsa-miR-345 | ME1      | ME1      | -        |
| hsa-miR-345 | MED1     | MED1     | -        |
| hsa-miR-345 | MED28    | MED28    | -        |
| hsa-miR-345 | MED31    | MED31    | -        |
| hsa-miR-345 | MED6     | MED6     | -        |
| hsa-miR-345 | MEGF10   | MEGF10   | -        |
| hsa-miR-345 | MEGF6    | MEGF6    | -        |
| hsa-miR-345 | MEIS3    | MEIS3    | -        |
| hsa-miR-345 | METAP1   | METAP1   | -        |
| hsa-miR-345 | METTL9   | METTL9   | -        |
| hsa-miR-345 | MFAP3    | MFAP3    | -        |
| hsa-miR-345 | MFAP4    | MFAP4    | -        |
| hsa-miR-345 | MFHAS1   | MFHAS1   | -        |
| hsa-miR-345 | MGA      | MGA      | -        |
| hsa-miR-345 | MGAT1    | MGAT1    | -        |
| hsa-miR-345 | MGEA5    | MGEA5    | -        |
| hsa-miR-345 | MICAL3   | MICAL3   | -        |
| hsa-miR-345 | MKNK1    | MKNK1    | -        |
| hsa-miR-345 | MLANA    | MLANA    | -        |
| hsa-miR-345 | MLC1     | MLC1     | -        |
| hsa-miR-345 | MLL3     | MLL3     | -        |
| hsa-miR-345 | MLLT10   | MLLT10   | -        |
| hsa-miR-345 | MLLT3    | MLLT3    | -        |
| hsa-miR-345 | MMP16    | MMP16    | -        |
| hsa-miR-345 | MMP8     | MMP8     | -        |
| hsa-miR-345 | MOBP     | MOBP     | -        |
| hsa-miR-345 | MORN3    | -        | MORN3    |
| hsa-miR-345 | MPEG1    | MPEG1    | -        |
| hsa-miR-345 | MPHOSPH9 | MPHOSPH9 | -        |
| hsa-miR-345 | MPZL2    | MPZL2    | -        |

|             |        |        |        |
|-------------|--------|--------|--------|
| hsa-miR-345 | MREG   | MREG   | -      |
| hsa-miR-345 | MRM1   | -      | MRM1   |
| hsa-miR-345 | MRPL18 | MRPL18 | -      |
| hsa-miR-345 | MRPL22 | MRPL22 | -      |
| hsa-miR-345 | MRPL30 | MRPL30 | -      |
| hsa-miR-345 | MRPL43 | -      | MRPL43 |
| hsa-miR-345 | MRPS16 | MRPS16 | -      |
| hsa-miR-345 | MRPS25 | MRPS25 | -      |
| hsa-miR-345 | MRPS27 | MRPS27 | -      |
| hsa-miR-345 | MRPS36 | MRPS36 | -      |
| hsa-miR-345 | MRS2   | MRS2   | -      |
| hsa-miR-345 | MS4A15 | MS4A15 | -      |
| hsa-miR-345 | MTDH   | MTDH   | -      |
| hsa-miR-345 | MTERF  | MTERF  | -      |
| hsa-miR-345 | MTF2   | MTF2   | -      |
| hsa-miR-345 | MTL5   | MTL5   | -      |
| hsa-miR-345 | MTMR1  | -      | MTMR1  |
| hsa-miR-345 | MTMR12 | MTMR12 | -      |
| hsa-miR-345 | MTMR3  | MTMR3  | -      |
| hsa-miR-345 | MTMR4  | MTMR4  | -      |
| hsa-miR-345 | MTTP   | MTTP   | -      |
| hsa-miR-345 | MUC6   | MUC6   | -      |
| hsa-miR-345 | MUDENG | MUDENG | -      |
| hsa-miR-345 | MXRA5  | MXRA5  | -      |
| hsa-miR-345 | MXRA8  | -      | MXRA8  |
| hsa-miR-345 | MYEOV  | MYEOV  | -      |
| hsa-miR-345 | MYO7A  | MYO7A  | -      |
| hsa-miR-345 | MYO9A  | -      | MYO9A  |
| hsa-miR-345 | MYO9B  | -      | MYO9B  |
| hsa-miR-345 | NAA30  | NAA30  | -      |
| hsa-miR-345 | NAA50  | NAA50  | -      |
| hsa-miR-345 | NAAA   | NAAA   | -      |
| hsa-miR-345 | NADK   | NADK   | -      |
| hsa-miR-345 | NAP1L4 | NAP1L4 | -      |
| hsa-miR-345 | NAT14  | -      | NAT14  |
| hsa-miR-345 | NBL1   | -      | NBL1   |
| hsa-miR-345 | NBPF11 | NBPF11 | -      |
| hsa-miR-345 | NBPF14 | NBPF14 | -      |
| hsa-miR-345 | NBPF15 | NBPF15 | -      |
| hsa-miR-345 | NBPF16 | NBPF16 | -      |
| hsa-miR-345 | NBPF3  | NBPF3  | -      |
| hsa-miR-345 | NCAPH  | NCAPH  | -      |
| hsa-miR-345 | NCKAP5 | NCKAP5 | -      |
| hsa-miR-345 | NDEL1  | NDEL1  | -      |
| hsa-miR-345 | NDN    | NDN    | -      |
| hsa-miR-345 | NDOR1  | NDOR1  | -      |
| hsa-miR-345 | NDST1  | -      | NDST1  |
| hsa-miR-345 | NECAP2 | NECAP2 | -      |
| hsa-miR-345 | NEFL   | NEFL   | -      |
| hsa-miR-345 | NEK7   | NEK7   | -      |
| hsa-miR-345 | NF1    | NF1    | -      |

|             |          |          |         |
|-------------|----------|----------|---------|
| hsa-miR-345 | NFAM1    | -        | NFAM1   |
| hsa-miR-345 | NFAT5    | NFAT5    | -       |
| hsa-miR-345 | NFE2L3   | NFE2L3   | -       |
| hsa-miR-345 | NFIL3    | NFIL3    | -       |
| hsa-miR-345 | NFU1     | NFU1     | -       |
| hsa-miR-345 | NGDN     | NGDN     | -       |
| hsa-miR-345 | NHLRC1   | NHLRC1   | -       |
| hsa-miR-345 | NHLRC2   | NHLRC2   | -       |
| hsa-miR-345 | NHS      | NHS      | -       |
| hsa-miR-345 | NICN1    | NICN1    | -       |
| hsa-miR-345 | NID1     | NID1     | -       |
| hsa-miR-345 | NKAIN3   | NKAIN3   | -       |
| hsa-miR-345 | NKPD1    | NKPD1    | -       |
| hsa-miR-345 | NKX2-2   | NKX2-2   | -       |
| hsa-miR-345 | NMUR2    | NMUR2    | -       |
| hsa-miR-345 | NOL12    | -        | NOL12   |
| hsa-miR-345 | NOL6     | NOL6     | -       |
| hsa-miR-345 | NOTCH2NL | NOTCH2NL | -       |
| hsa-miR-345 | NOV      | NOV      | -       |
| hsa-miR-345 | NPEPPS   | NPEPPS   | -       |
| hsa-miR-345 | NPHS2    | -        | NPHS2   |
| hsa-miR-345 | NPLOC4   | NPLOC4   | -       |
| hsa-miR-345 | NRBP2    | -        | NRBP2   |
| hsa-miR-345 | NRP2     | NRP2     | -       |
| hsa-miR-345 | NRSN1    | NRSN1    | -       |
| hsa-miR-345 | NSUN7    | NSUN7    | -       |
| hsa-miR-345 | NT5E     | NT5E     | -       |
| hsa-miR-345 | NUAK1    | NUAK1    | -       |
| hsa-miR-345 | NUAK2    | NUAK2    | -       |
| hsa-miR-345 | NUB1     | NUB1     | -       |
| hsa-miR-345 | NUDCD1   | NUDCD1   | -       |
| hsa-miR-345 | NUDT10   | NUDT10   | -       |
| hsa-miR-345 | NUDT4    | NUDT4    | -       |
| hsa-miR-345 | NUMBL    | NUMBL    | -       |
| hsa-miR-345 | NUP160   | NUP160   | -       |
| hsa-miR-345 | NUP214   | NUP214   | -       |
| hsa-miR-345 | OAS2     | OAS2     | -       |
| hsa-miR-345 | OAZ2     | OAZ2     | -       |
| hsa-miR-345 | OBFC2B   | -        | OBFC2B  |
| hsa-miR-345 | OGDH     | -        | OGDH    |
| hsa-miR-345 | OGDHL    | OGDHL    | -       |
| hsa-miR-345 | OGFOD2   | -        | OGFOD2  |
| hsa-miR-345 | OLA1     | OLA1     | -       |
| hsa-miR-345 | OLFML2A  | -        | OLFML2A |
| hsa-miR-345 | OPA1     | OPA1     | -       |
| hsa-miR-345 | OR13A1   | OR13A1   | -       |
| hsa-miR-345 | OSCAR    | OSCAR    | -       |
| hsa-miR-345 | OSGIN2   | OSGIN2   | -       |
| hsa-miR-345 | OTOF     | -        | OTOF    |
| hsa-miR-345 | OTOS     | -        | OTOS    |
| hsa-miR-345 | OXCT1    | OXCT1    | -       |

|             |         |         |        |
|-------------|---------|---------|--------|
| hsa-miR-345 | -       | P2RY2   | P2RY2  |
| hsa-miR-345 | P2RY8   | P2RY8   | -      |
| hsa-miR-345 | P4HA3   | P4HA3   | -      |
| hsa-miR-345 | PA2G4   | PA2G4   | -      |
| hsa-miR-345 | PAH     | PAH     | -      |
| hsa-miR-345 | PAM     | PAM     | -      |
| hsa-miR-345 | PAPOLG  | PAPOLG  | -      |
| hsa-miR-345 | PAQR7   | PAQR7   | -      |
| hsa-miR-345 | PARD3B  | -       | PARD3B |
| hsa-miR-345 | PARP10  | -       | PARP10 |
| hsa-miR-345 | PARP16  | PARP16  | -      |
| hsa-miR-345 | PAX8    | PAX8    | -      |
| hsa-miR-345 | PBRM1   | PBRM1   | -      |
| hsa-miR-345 | PBX3    | PBX3    | -      |
| hsa-miR-345 | PCBP4   | -       | PCBP4  |
| hsa-miR-345 | PCDH10  | PCDH10  | -      |
| hsa-miR-345 | PCDH11X | PCDH11X | -      |
| hsa-miR-345 | PCDH11Y | PCDH11Y | -      |
| hsa-miR-345 | PCDH12  | -       | PCDH12 |
| hsa-miR-345 | PCDH15  | PCDH15  | -      |
| hsa-miR-345 | PCDHA9  | PCDHA9  | -      |
| hsa-miR-345 | PCDHB16 | PCDHB16 | -      |
| hsa-miR-345 | PCNA    | PCNA    | -      |
| hsa-miR-345 | PCP4L1  | PCP4L1  | -      |
| hsa-miR-345 | PCSK1   | PCSK1   | -      |
| hsa-miR-345 | PCSK6   | PCSK6   | -      |
| hsa-miR-345 | PCSK7   | PCSK7   | -      |
| hsa-miR-345 | PDE12   | PDE12   | -      |
| hsa-miR-345 | PDE1A   | PDE1A   | -      |
| hsa-miR-345 | PDE1C   | PDE1C   | -      |
| hsa-miR-345 | PDE4C   | -       | PDE4C  |
| hsa-miR-345 | PDE4D   | PDE4D   | -      |
| hsa-miR-345 | PDE6A   | PDE6A   | -      |
| hsa-miR-345 | PDE7A   | PDE7A   | -      |
| hsa-miR-345 | PDGFC   | PDGFC   | -      |
| hsa-miR-345 | PDLIM2  | -       | PDLIM2 |
| hsa-miR-345 | PDYN    | -       | PDYN   |
| hsa-miR-345 | PELI3   | PELI3   | -      |
| hsa-miR-345 | PER2    | PER2    | -      |
| hsa-miR-345 | PER3    | PER3    | -      |
| hsa-miR-345 | PEX19   | PEX19   | -      |
| hsa-miR-345 | -       | PFDN5   | PFDN5  |
| hsa-miR-345 | PGS1    | -       | PGS1   |
| hsa-miR-345 | PHF13   | -       | PHF13  |
| hsa-miR-345 | PHF17   | PHF17   | -      |
| hsa-miR-345 | PHF2    | PHF2    | -      |
| hsa-miR-345 | PHF20L1 | PHF20L1 | -      |
| hsa-miR-345 | PHIP    | PHIP    | -      |
| hsa-miR-345 | PHKA2   | PHKA2   | -      |
| hsa-miR-345 | PHKG2   | PHKG2   | -      |
| hsa-miR-345 | PHYHD1  | -       | PHYHD1 |

|             |         |         |         |
|-------------|---------|---------|---------|
| hsa-miR-345 | PHYHIP  | PHYHIP  | -       |
| hsa-miR-345 | PI4K2A  | PI4K2A  | -       |
| hsa-miR-345 | PIAS2   | PIAS2   | -       |
| hsa-miR-345 | PIAS3   | -       | PIAS3   |
| hsa-miR-345 | PIBF1   | PIBF1   | -       |
| hsa-miR-345 | PIGM    | PIGM    | -       |
| hsa-miR-345 | PIGN    | PIGN    | -       |
| hsa-miR-345 | PIGO    | PIGO    | -       |
| hsa-miR-345 | PIK3R2  | -       | PIK3R2  |
| hsa-miR-345 | PIK3R3  | PIK3R3  | -       |
| hsa-miR-345 | PIN1    | PIN1    | -       |
| hsa-miR-345 | PINK1   | -       | PINK1   |
| hsa-miR-345 | PIP4K2C | PIP4K2C | -       |
| hsa-miR-345 | PITRM1  | -       | PITRM1  |
| hsa-miR-345 | PKHD1   | PKHD1   | -       |
| hsa-miR-345 | PKN2    | PKN2    | -       |
| hsa-miR-345 | PLA2G15 | PLA2G15 | -       |
| hsa-miR-345 | PLAC4   | PLAC4   | -       |
| hsa-miR-345 | PLAG1   | PLAG1   | -       |
| hsa-miR-345 | PLCB3   | -       | PLCB3   |
| hsa-miR-345 | PLCE1   | -       | PLCE1   |
| hsa-miR-345 | PLCL1   | PLCL1   | -       |
| hsa-miR-345 | PLD5    | PLD5    | -       |
| hsa-miR-345 | PLEKHH1 | PLEKHH1 | -       |
| hsa-miR-345 | PLEKHM2 | -       | PLEKHM2 |
| hsa-miR-345 | PLEKHM3 | PLEKHM3 | -       |
| hsa-miR-345 | PLEKHN1 | -       | PLEKHN1 |
| hsa-miR-345 | PLLP    | -       | PLLP    |
| hsa-miR-345 | PLS3    | PLS3    | -       |
| hsa-miR-345 | PML     | PML     | -       |
| hsa-miR-345 | PMP2    | PMP2    | -       |
| hsa-miR-345 | PNKD    | PNKD    | -       |
| hsa-miR-345 | PNN     | PNN     | -       |
| hsa-miR-345 | -       | PNPLA6  | PNPLA6  |
| hsa-miR-345 | POC1A   | POC1A   | -       |
| hsa-miR-345 | POFUT2  | POFUT2  | -       |
| hsa-miR-345 | POLR1E  | POLR1E  | -       |
| hsa-miR-345 | POLR3H  | POLR3H  | -       |
| hsa-miR-345 | POT1    | POT1    | -       |
| hsa-miR-345 | POU2F2  | POU2F2  | -       |
| hsa-miR-345 | PPAPDC3 | -       | PPAPDC3 |
| hsa-miR-345 | -       | PPFIA1  | PPFIA1  |
| hsa-miR-345 | PPIP5K2 | PPIP5K2 | -       |
| hsa-miR-345 | PPM1L   | PPM1L   | -       |
| hsa-miR-345 | PPM1M   | PPM1M   | -       |
| hsa-miR-345 | -       | PPOX    | PPOX    |
| hsa-miR-345 | PPP1CC  | -       | PPP1CC  |
| hsa-miR-345 | PPP1R9B | -       | PPP1R9B |
| hsa-miR-345 | PPP2R2A | PPP2R2A | -       |
| hsa-miR-345 | PPP2R3A | PPP2R3A | -       |
| hsa-miR-345 | PPTC7   | PPTC7   | -       |

|             |           |           |        |
|-------------|-----------|-----------|--------|
| hsa-miR-345 | PRAMEF12  | PRAMEF12  | -      |
| hsa-miR-345 | PRAMEF8   | PRAMEF8   | -      |
| hsa-miR-345 | PRDM2     | PRDM2     | -      |
| hsa-miR-345 | PRDM6     | PRDM6     | -      |
| hsa-miR-345 | PRDM7     | PRDM7     | -      |
| hsa-miR-345 | PREX1     | PREX1     | -      |
| hsa-miR-345 | PRKAB1    | -         | PRKAB1 |
| hsa-miR-345 | PRKCB     | PRKCB     | -      |
| hsa-miR-345 | PRKRIP1   | PRKRIP1   | -      |
| hsa-miR-345 | PRND      | PRND      | -      |
| hsa-miR-345 | PRR12     | -         | PRR12  |
| hsa-miR-345 | PRR3      | PRR3      | -      |
| hsa-miR-345 | PRRG1     | -         | PRRG1  |
| hsa-miR-345 | PRSS45    | PRSS45    | -      |
| hsa-miR-345 | PRSS50    | PRSS50    | -      |
| hsa-miR-345 | PSG1      | PSG1      | -      |
| hsa-miR-345 | PSG8      | PSG8      | -      |
| hsa-miR-345 | PSMA1     | -         | PSMA1  |
| hsa-miR-345 | PSMD5     | -         | PSMD5  |
| hsa-miR-345 | PSME3     | PSME3     | -      |
| hsa-miR-345 | PSMF1     | PSMF1     | -      |
| hsa-miR-345 | PSMG3     | PSMG3     | -      |
| hsa-miR-345 | PTCH1     | PTCH1     | -      |
| hsa-miR-345 | PTDSS2    | -         | PTDSS2 |
| hsa-miR-345 | PTMA      | PTMA      | -      |
| hsa-miR-345 | PTOV1     | -         | PTOV1  |
| hsa-miR-345 | PTPN12    | PTPN12    | -      |
| hsa-miR-345 | PTPN14    | -         | PTPN14 |
| hsa-miR-345 | PTPN21    | PTPN21    | -      |
| hsa-miR-345 | PTPN23    | -         | PTPN23 |
| hsa-miR-345 | PTPRB     | PTPRB     | -      |
| hsa-miR-345 | PTPRD     | PTPRD     | -      |
| hsa-miR-345 | PTPRF     | PTPRF     | -      |
| hsa-miR-345 | PTPRJ     | PTPRJ     | -      |
| hsa-miR-345 | PTPRO     | PTPRO     | -      |
| hsa-miR-345 | PTPRR     | PTPRR     | -      |
| hsa-miR-345 | PUS10     | PUS10     | -      |
| hsa-miR-345 | PUS7L     | PUS7L     | -      |
| hsa-miR-345 | PVALB     | PVALB     | -      |
| hsa-miR-345 | PVRL1     | PVRL1     | -      |
| hsa-miR-345 | PXN       | PXN       | -      |
| hsa-miR-345 | PYCR2     | -         | PYCR2  |
| hsa-miR-345 | QDPR      | QDPR      | -      |
| hsa-miR-345 | QPRT      | -         | QPRT   |
| hsa-miR-345 | QRSL1     | QRSL1     | -      |
| hsa-miR-345 | RAB11FIP2 | RAB11FIP2 | -      |
| hsa-miR-345 | RAB14     | RAB14     | -      |
| hsa-miR-345 | RAB1A     | RAB1A     | -      |
| hsa-miR-345 | RAB27B    | RAB27B    | -      |
| hsa-miR-345 | RAB39B    | RAB39B    | -      |
| hsa-miR-345 | RAB3B     | RAB3B     | -      |

|             |         |         |        |
|-------------|---------|---------|--------|
| hsa-miR-345 | RAB3D   | -       | RAB3D  |
| hsa-miR-345 | RAB5A   | RAB5A   | -      |
| hsa-miR-345 | RABGEF1 | RABGEF1 | -      |
| hsa-miR-345 | RABL5   | RABL5   | -      |
| hsa-miR-345 | RALGAPB | RALGAPB | -      |
| hsa-miR-345 | RANBP17 | RANBP17 | -      |
| hsa-miR-345 | RANBP6  | RANBP6  | -      |
| hsa-miR-345 | RAP1A   | RAP1A   | -      |
| hsa-miR-345 | RAPGEF3 | RAPGEF3 | -      |
| hsa-miR-345 | RAPGEF5 | RAPGEF5 | -      |
| hsa-miR-345 | RASA3   | -       | RASA3  |
| hsa-miR-345 | RASA4   | RASA4   | -      |
| hsa-miR-345 | RASAL2  | RASAL2  | -      |
| hsa-miR-345 | RASSF4  | -       | RASSF4 |
| hsa-miR-345 | RAVER2  | RAVER2  | -      |
| hsa-miR-345 | RBBP5   | RBBP5   | -      |
| hsa-miR-345 | RBBP9   | RBBP9   | -      |
| hsa-miR-345 | RBM14   | -       | RBM14  |
| hsa-miR-345 | RBM23   | RBM23   | -      |
| hsa-miR-345 | RBM24   | RBM24   | -      |
| hsa-miR-345 | RBMS3   | RBMS3   | -      |
| hsa-miR-345 | RBP4    | -       | RBP4   |
| hsa-miR-345 | RCN2    | RCN2    | -      |
| hsa-miR-345 | RCSD1   | RCSD1   | -      |
| hsa-miR-345 | RD3     | -       | RD3    |
| hsa-miR-345 | RDH12   | -       | RDH12  |
| hsa-miR-345 | RELA    | RELA    | -      |
| hsa-miR-345 | RELL1   | RELL1   | -      |
| hsa-miR-345 | RETSAT  | RETSAT  | -      |
| hsa-miR-345 | RGL4    | RGL4    | -      |
| hsa-miR-345 | RGMA    | RGMA    | -      |
| hsa-miR-345 | RGS2    | -       | RGS2   |
| hsa-miR-345 | RGS7    | RGS7    | -      |
| hsa-miR-345 | RHCE    | RHCE    | -      |
| hsa-miR-345 | RHD     | RHD     | -      |
| hsa-miR-345 | RHOA    | RHOA    | -      |
| hsa-miR-345 | RHOBTB1 | RHOBTB1 | -      |
| hsa-miR-345 | RHOBTB3 | RHOBTB3 | -      |
| hsa-miR-345 | RIBC1   | -       | RIBC1  |
| hsa-miR-345 | RIMS2   | RIMS2   | -      |
| hsa-miR-345 | RIN2    | RIN2    | -      |
| hsa-miR-345 | RND2    | RND2    | -      |
| hsa-miR-345 | RNF11   | RNF11   | -      |
| hsa-miR-345 | RNF111  | RNF111  | -      |
| hsa-miR-345 | RNF138  | RNF138  | -      |
| hsa-miR-345 | RNF20   | RNF20   | -      |
| hsa-miR-345 | RNF222  | RNF222  | -      |
| hsa-miR-345 | RNF4    | RNF4    | -      |
| hsa-miR-345 | RNFT2   | RNFT2   | -      |
| hsa-miR-345 | RNMTL1  | -       | RNMTL1 |
| hsa-miR-345 | RNPS1   | RNPS1   | -      |

|             |           |           |          |
|-------------|-----------|-----------|----------|
| hsa-miR-345 | ROBO2     | ROBO2     | -        |
| hsa-miR-345 | ROM1      | -         | ROM1     |
| hsa-miR-345 | ROR1      | ROR1      | -        |
| hsa-miR-345 | RORA      | -         | RORA     |
| hsa-miR-345 | RPAP3     | RPAP3     | -        |
| hsa-miR-345 | RPGR      | RPGR      | -        |
| hsa-miR-345 | RPP14     | RPP14     | -        |
| hsa-miR-345 | RPP30     | RPP30     | -        |
| hsa-miR-345 | RPS23     | RPS23     | -        |
| hsa-miR-345 | RPS6KB1   | RPS6KB1   | -        |
| hsa-miR-345 | RPUSD3    | RPUSD3    | -        |
| hsa-miR-345 | RRN3      | RRN3      | -        |
| hsa-miR-345 | RRP1      | -         | RRP1     |
| hsa-miR-345 | RSAD2     | RSAD2     | -        |
| hsa-miR-345 | RSBN1L    | RSBN1L    | -        |
| hsa-miR-345 | RSPH3     | RSPH3     | -        |
| hsa-miR-345 | RSPO1     | RSPO1     | -        |
| hsa-miR-345 | RSPO3     | RSPO3     | -        |
| hsa-miR-345 | RTN4      | RTN4      | -        |
| hsa-miR-345 | RTP3      | RTP3      | -        |
| hsa-miR-345 | RUFY4     | -         | RUFY4    |
| hsa-miR-345 | RUNX2     | RUNX2     | -        |
| hsa-miR-345 | RUNX3     | RUNX3     | -        |
| hsa-miR-345 | RYR2      | RYR2      | -        |
| hsa-miR-345 | SACM1L    | SACM1L    | -        |
| hsa-miR-345 | SAMD11    | -         | SAMD11   |
| hsa-miR-345 | SAMD4B    | SAMD4B    | -        |
| hsa-miR-345 | SART3     | SART3     | -        |
| hsa-miR-345 | SASH3     | SASH3     | -        |
| hsa-miR-345 | SCIN      | SCIN      | -        |
| hsa-miR-345 | SCML2     | SCML2     | -        |
| hsa-miR-345 | SCML4     | SCML4     | -        |
| hsa-miR-345 | SCN11A    | -         | SCN11A   |
| hsa-miR-345 | SCN3B     | SCN3B     | -        |
| hsa-miR-345 | SCN4A     | -         | SCN4A    |
| hsa-miR-345 | SCUBE1    | SCUBE1    | -        |
| hsa-miR-345 | SCUBE3    | SCUBE3    | -        |
| hsa-miR-345 | SDHC      | -         | SDHC     |
| hsa-miR-345 | SDK2      | SDK2      | -        |
| hsa-miR-345 | SEC14L3   | SEC14L3   | -        |
| hsa-miR-345 | SECISBP2L | SECISBP2L | -        |
| hsa-miR-345 | SECTM1    | -         | SECTM1   |
| hsa-miR-345 | SELV      | SELV      | -        |
| hsa-miR-345 | SEMA3D    | SEMA3D    | -        |
| hsa-miR-345 | SEN5      | SEN5      | -        |
| hsa-miR-345 | SEN6      | SEN6      | -        |
| hsa-miR-345 | SERF2     | SERF2     | -        |
| hsa-miR-345 | SERPINH1  | -         | SERPINH1 |
| hsa-miR-345 | SETD6     | SETD6     | -        |
| hsa-miR-345 | SETX      | SETX      | -        |
| hsa-miR-345 | SF3B1     | SF3B1     | -        |



|             |          |          |          |
|-------------|----------|----------|----------|
| hsa-miR-345 | SFRP2    | SFRP2    | -        |
| hsa-miR-345 | SGMS1    | SGMS1    | -        |
| hsa-miR-345 | SGPP1    | SGPP1    | -        |
| hsa-miR-345 | SH3GLB2  | -        | SH3GLB2  |
| hsa-miR-345 | SH3TC2   | SH3TC2   | -        |
| hsa-miR-345 | SHANK3   | SHANK3   | -        |
| hsa-miR-345 | SHOC2    | SHOC2    | -        |
| hsa-miR-345 | SHOX2    | SHOX2    | -        |
| hsa-miR-345 | SHPRH    | SHPRH    | -        |
| hsa-miR-345 | SIK3     | SIK3     | -        |
| hsa-miR-345 | SIL1     | -        | SIL1     |
| hsa-miR-345 | SIP1     | SIP1     | -        |
| hsa-miR-345 | SIPA1L3  | -        | SIPA1L3  |
| hsa-miR-345 | SIRPB2   | SIRPB2   | -        |
| hsa-miR-345 | SIRT5    | -        | SIRT5    |
| hsa-miR-345 | SLAIN2   | SLAIN2   | -        |
| hsa-miR-345 | SLAMF7   | SLAMF7   | -        |
| hsa-miR-345 | SLC11A2  | SLC11A2  | -        |
| hsa-miR-345 | SLC12A3  | SLC12A3  | -        |
| hsa-miR-345 | SLC16A13 | SLC16A13 | -        |
| hsa-miR-345 | SLC17A4  | SLC17A4  | -        |
| hsa-miR-345 | SLC19A3  | SLC19A3  | -        |
| hsa-miR-345 | SLC1A1   | SLC1A1   | -        |
| hsa-miR-345 | SLC1A7   | SLC1A7   | -        |
| hsa-miR-345 | SLC20A2  | SLC20A2  | -        |
| hsa-miR-345 | -        | SLC22A14 | SLC22A14 |
| hsa-miR-345 | SLC22A17 | -        | SLC22A17 |
| hsa-miR-345 | SLC25A18 | SLC25A18 | -        |
| hsa-miR-345 | SLC25A19 | -        | SLC25A19 |
| hsa-miR-345 | SLC25A35 | SLC25A35 | -        |
| hsa-miR-345 | SLC25A36 | SLC25A36 | -        |
| hsa-miR-345 | SLC26A8  | -        | SLC26A8  |
| hsa-miR-345 | SLC28A1  | -        | SLC28A1  |
| hsa-miR-345 | SLC29A4  | -        | SLC29A4  |
| hsa-miR-345 | SLC2A12  | SLC2A12  | -        |
| hsa-miR-345 | SLC2A13  | SLC2A13  | -        |
| hsa-miR-345 | SLC2A2   | SLC2A2   | -        |
| hsa-miR-345 | SLC2A5   | SLC2A5   | -        |
| hsa-miR-345 | SLC30A10 | SLC30A10 | -        |
| hsa-miR-345 | SLC30A7  | -        | SLC30A7  |
| hsa-miR-345 | SLC35E1  | -        | SLC35E1  |
| hsa-miR-345 | SLC35E2  | SLC35E2  | -        |
| hsa-miR-345 | SLC35F2  | SLC35F2  | -        |
| hsa-miR-345 | SLC39A11 | SLC39A11 | -        |
| hsa-miR-345 | SLC43A3  | SLC43A3  | -        |
| hsa-miR-345 | SLC44A4  | SLC44A4  | -        |
| hsa-miR-345 | SLC45A2  | SLC45A2  | -        |
| hsa-miR-345 | SLC46A1  | -        | SLC46A1  |
| hsa-miR-345 | SLC47A2  | SLC47A2  | -        |
| hsa-miR-345 | -        | SLC4A9   | SLC4A9   |
| hsa-miR-345 | SLC5A1   | SLC5A1   | -        |

|             |          |          |         |
|-------------|----------|----------|---------|
| hsa-miR-345 | SLC6A14  | SLC6A14  | -       |
| hsa-miR-345 | SLC6A15  | SLC6A15  | -       |
| hsa-miR-345 | SLC7A1   | -        | SLC7A1  |
| hsa-miR-345 | SLC7A6   | SLC7A6   | -       |
| hsa-miR-345 | SLC8A1   | SLC8A1   | -       |
| hsa-miR-345 | SLC9A11  | SLC9A11  | -       |
| hsa-miR-345 | SLC9A3R2 | SLC9A3R2 | -       |
| hsa-miR-345 | SLC9A8   | SLC9A8   | -       |
| hsa-miR-345 | SLCO1A2  | SLCO1A2  | -       |
| hsa-miR-345 | SLCO4C1  | SLCO4C1  | -       |
| hsa-miR-345 | SMAD1    | SMAD1    | -       |
| hsa-miR-345 | SMARCA1  | SMARCA1  | -       |
| hsa-miR-345 | SMC1A    | SMC1A    | -       |
| hsa-miR-345 | SMC2     | SMC2     | -       |
| hsa-miR-345 | SMG1     | SMG1     | -       |
| hsa-miR-345 | SMG6     | SMG6     | -       |
| hsa-miR-345 | SMPDL3B  | -        | SMPDL3B |
| hsa-miR-345 | SMURF1   | SMURF1   | -       |
| hsa-miR-345 | SMYD2    | SMYD2    | -       |
| hsa-miR-345 | SMYD4    | SMYD4    | -       |
| hsa-miR-345 | SNAI3    | SNAI3    | -       |
| hsa-miR-345 | SNAP23   | SNAP23   | -       |
| hsa-miR-345 | SNAP29   | SNAP29   | -       |
| hsa-miR-345 | SNRPE    | SNRPE    | -       |
| hsa-miR-345 | SNTN     | SNTN     | -       |
| hsa-miR-345 | SNX13    | SNX13    | -       |
| hsa-miR-345 | SNX16    | SNX16    | -       |
| hsa-miR-345 | SNX19    | SNX19    | -       |
| hsa-miR-345 | SNX21    | SNX21    | -       |
| hsa-miR-345 | -        | SNX25    | SNX25   |
| hsa-miR-345 | SNX33    | SNX33    | -       |
| hsa-miR-345 | SORT1    | SORT1    | -       |
| hsa-miR-345 | SOX17    | SOX17    | -       |
| hsa-miR-345 | SP3      | SP3      | -       |
| hsa-miR-345 | SPAG9    | SPAG9    | -       |
| hsa-miR-345 | SPARC    | SPARC    | -       |
| hsa-miR-345 | SPAST    | SPAST    | -       |
| hsa-miR-345 | SPATA3   | -        | SPATA3  |
| hsa-miR-345 | SPEG     | -        | SPEG    |
| hsa-miR-345 | SPINLW1  | SPINLW1  | -       |
| hsa-miR-345 | SPIRE1   | -        | SPIRE1  |
| hsa-miR-345 | SPOCK3   | SPOCK3   | -       |
| hsa-miR-345 | SPRED2   | SPRED2   | -       |
| hsa-miR-345 | SPRY4    | SPRY4    | -       |
| hsa-miR-345 | SPRYD5   | SPRYD5   | -       |
| hsa-miR-345 | SPTB     | -        | SPTB    |
| hsa-miR-345 | SPTBN1   | SPTBN1   | -       |
| hsa-miR-345 | SRGAP1   | SRGAP1   | -       |
| hsa-miR-345 | SRL      | SRL      | -       |
| hsa-miR-345 | SRP19    | SRP19    | -       |
| hsa-miR-345 | SRRM2    | -        | SRRM2   |

|             |          |         |          |
|-------------|----------|---------|----------|
| hsa-miR-345 | SSTR2    | SSTR2   | -        |
| hsa-miR-345 | ST8SIA5  | -       | ST8SIA5  |
| hsa-miR-345 | STAG2    | STAG2   | -        |
| hsa-miR-345 | STARD13  | -       | STARD13  |
| hsa-miR-345 | STARD3   | STARD3  | -        |
| hsa-miR-345 | STAU2    | STAU2   | -        |
| hsa-miR-345 | STK32A   | STK32A  | -        |
| hsa-miR-345 | STK32B   | STK32B  | -        |
| hsa-miR-345 | STMN1    | STMN1   | -        |
| hsa-miR-345 | STMN3    | -       | STMN3    |
| hsa-miR-345 | STON1    | STON1   | -        |
| hsa-miR-345 | STX11    | STX11   | -        |
| hsa-miR-345 | STX3     | STX3    | -        |
| hsa-miR-345 | SULT1A3  | SULT1A3 | -        |
| hsa-miR-345 | SURF6    | -       | SURF6    |
| hsa-miR-345 | SUSD1    | -       | SUSD1    |
| hsa-miR-345 | SYCE1    | -       | SYCE1    |
| hsa-miR-345 | SYCP2L   | SYCP2L  | -        |
| hsa-miR-345 | SYP      | SYP     | -        |
| hsa-miR-345 | SYS1     | SYS1    | -        |
| hsa-miR-345 | SYT11    | SYT11   | -        |
| hsa-miR-345 | SYT4     | SYT4    | -        |
| hsa-miR-345 | SYTL4    | SYTL4   | -        |
| hsa-miR-345 | TACR1    | -       | TACR1    |
| hsa-miR-345 | TACR2    | -       | TACR2    |
| hsa-miR-345 | TADA2A   | TADA2A  | -        |
| hsa-miR-345 | TAF7     | -       | TAF7     |
| hsa-miR-345 | TAL1     | TAL1    | -        |
| hsa-miR-345 | TANC2    | TANC2   | -        |
| hsa-miR-345 | TAOK2    | TAOK2   | -        |
| hsa-miR-345 | TAPT1    | -       | TAPT1    |
| hsa-miR-345 | TAX1BP1  | -       | TAX1BP1  |
| hsa-miR-345 | TBC1D10B | -       | TBC1D10B |
| hsa-miR-345 | TBC1D13  | TBC1D13 | -        |
| hsa-miR-345 | TBC1D30  | TBC1D30 | -        |
| hsa-miR-345 | TBC1D4   | TBC1D4  | -        |
| hsa-miR-345 | TBC1D5   | TBC1D5  | -        |
| hsa-miR-345 | TBC1D8B  | TBC1D8B | -        |
| hsa-miR-345 | TBX19    | TBX19   | -        |
| hsa-miR-345 | TCEANC   | TCEANC  | -        |
| hsa-miR-345 | TCEB3    | TCEB3   | -        |
| hsa-miR-345 | TCF15    | TCF15   | -        |
| hsa-miR-345 | TCF4     | TCF4    | -        |
| hsa-miR-345 | TCHHL1   | TCHHL1  | -        |
| hsa-miR-345 | TCP10L   | TCP10L  | -        |
| hsa-miR-345 | TCTA     | TCTA    | -        |
| hsa-miR-345 | TECPR2   | TECPR2  | -        |
| hsa-miR-345 | TEPP     | TEPP    | -        |
| hsa-miR-345 | TET2     | TET2    | -        |
| hsa-miR-345 | TEX14    | TEX14   | -        |
| hsa-miR-345 | TFAP2A   | TFAP2A  | -        |

|             |          |          |         |
|-------------|----------|----------|---------|
| hsa-miR-345 | TFDP1    | -        | TFDP1   |
| hsa-miR-345 | TFE3     | TFE3     | -       |
| hsa-miR-345 | TGFB2    | TGFB2    | -       |
| hsa-miR-345 | TGM2     | -        | TGM2    |
| hsa-miR-345 | THAP11   | THAP11   | -       |
| hsa-miR-345 | THAP5    | THAP5    | -       |
| hsa-miR-345 | THPO     | THPO     | -       |
| hsa-miR-345 | THSD4    | THSD4    | -       |
| hsa-miR-345 | TIAM1    | TIAM1    | -       |
| hsa-miR-345 | TIGD6    | TIGD6    | -       |
| hsa-miR-345 | TIGIT    | TIGIT    | -       |
| hsa-miR-345 | TIMM8A   | TIMM8A   | -       |
| hsa-miR-345 | TINF2    | TINF2    | -       |
| hsa-miR-345 | TJAP1    | TJAP1    | -       |
| hsa-miR-345 | TLK1     | TLK1     | -       |
| hsa-miR-345 | TLL2     | TLL2     | -       |
| hsa-miR-345 | TMCO7    | TMCO7    | -       |
| hsa-miR-345 | TMED1    | -        | TMED1   |
| hsa-miR-345 | TMEM104  | TMEM104  | -       |
| hsa-miR-345 | TMEM106B | TMEM106B | -       |
| hsa-miR-345 | TMEM108  | TMEM108  | -       |
| hsa-miR-345 | TMEM130  | TMEM130  | -       |
| hsa-miR-345 | TMEM164  | TMEM164  | -       |
| hsa-miR-345 | TMEM167A | TMEM167A | -       |
| hsa-miR-345 | TMEM168  | TMEM168  | -       |
| hsa-miR-345 | TMEM2    | TMEM2    | -       |
| hsa-miR-345 | TMEM222  | TMEM222  | -       |
| hsa-miR-345 | TMEM41A  | TMEM41A  | -       |
| hsa-miR-345 | TMEM43   | TMEM43   | -       |
| hsa-miR-345 | TMEM55B  | -        | TMEM55B |
| hsa-miR-345 | TMEM67   | TMEM67   | -       |
| hsa-miR-345 | TMEM70   | TMEM70   | -       |
| hsa-miR-345 | TMEM86A  | TMEM86A  | -       |
| hsa-miR-345 | TMLHE    | TMLHE    | -       |
| hsa-miR-345 | TMPRSS13 | TMPRSS13 | -       |
| hsa-miR-345 | TMPRSS5  | TMPRSS5  | -       |
| hsa-miR-345 | TMTC2    | TMTC2    | -       |
| hsa-miR-345 | TMTC3    | TMTC3    | -       |
| hsa-miR-345 | TNFAIP2  | TNFAIP2  | -       |
| hsa-miR-345 | TNFAIP3  | TNFAIP3  | -       |
| hsa-miR-345 | TNFRSF1B | TNFRSF1B | -       |
| hsa-miR-345 | TNPO2    | -        | TNPO2   |
| hsa-miR-345 | TNPO3    | -        | TNPO3   |
| hsa-miR-345 | TOB1     | TOB1     | -       |
| hsa-miR-345 | TOR1AIP1 | TOR1AIP1 | -       |
| hsa-miR-345 | TPM3     | -        | TPM3    |
| hsa-miR-345 | TPMT     | TPMT     | -       |
| hsa-miR-345 | TRAF5    | TRAF5    | -       |
| hsa-miR-345 | TRDMT1   | TRDMT1   | -       |
| hsa-miR-345 | TREML2   | -        | TREML2  |
| hsa-miR-345 | TRERF1   | TRERF1   | -       |

|             |         |         |         |
|-------------|---------|---------|---------|
| hsa-miR-345 | TRIM10  | -       | TRIM10  |
| hsa-miR-345 | TRIM37  | TRIM37  | -       |
| hsa-miR-345 | TRIM39  | TRIM39  | -       |
| hsa-miR-345 | TRIM56  | TRIM56  | -       |
| hsa-miR-345 | TRIM62  | TRIM62  | -       |
| hsa-miR-345 | TRIM67  | -       | TRIM67  |
| hsa-miR-345 | TROVE2  | TROVE2  | -       |
| hsa-miR-345 | TRPM1   | TRPM1   | -       |
| hsa-miR-345 | TRPS1   | TRPS1   | -       |
| hsa-miR-345 | TSC1    | TSC1    | -       |
| hsa-miR-345 | TSEN34  | TSEN34  | -       |
| hsa-miR-345 | TSPAN17 | -       | TSPAN17 |
| hsa-miR-345 | TSPAN18 | TSPAN18 | -       |
| hsa-miR-345 | TSPAN33 | TSPAN33 | -       |
| hsa-miR-345 | TSPO    | -       | TSPO    |
| hsa-miR-345 | TSPY1   | TSPY1   | -       |
| hsa-miR-345 | TSPY2   | TSPY2   | -       |
| hsa-miR-345 | TSPY3   | TSPY3   | -       |
| hsa-miR-345 | TTC19   | TTC19   | -       |
| hsa-miR-345 | TTC21A  | -       | TTC21A  |
| hsa-miR-345 | TTC23   | -       | TTC23   |
| hsa-miR-345 | TTC3    | TTC3    | -       |
| hsa-miR-345 | TTC39C  | TTC39C  | -       |
| hsa-miR-345 | TTC7A   | -       | TTC7A   |
| hsa-miR-345 | TUB     | TUB     | -       |
| hsa-miR-345 | TUBB    | TUBB    | -       |
| hsa-miR-345 | TUBGCP2 | -       | TUBGCP2 |
| hsa-miR-345 | TXNRD1  | -       | TXNRD1  |
| hsa-miR-345 | TYRO3   | TYRO3   | -       |
| hsa-miR-345 | TYSND1  | TYSND1  | -       |
| hsa-miR-345 | TYW3    | TYW3    | -       |
| hsa-miR-345 | UAP1L1  | UAP1L1  | -       |
| hsa-miR-345 | UBA5    | UBA5    | -       |
| hsa-miR-345 | UBAP2   | -       | UBAP2   |
| hsa-miR-345 | UBE2D3  | UBE2D3  | -       |
| hsa-miR-345 | UBE2L6  | UBE2L6  | -       |
| hsa-miR-345 | UBE2O   | UBE2O   | -       |
| hsa-miR-345 | UBE4B   | UBE4B   | -       |
| hsa-miR-345 | UBXN2B  | UBXN2B  | -       |
| hsa-miR-345 | UCK2    | -       | UCK2    |
| hsa-miR-345 | UFM1    | -       | UFM1    |
| hsa-miR-345 | UGT3A1  | UGT3A1  | -       |
| hsa-miR-345 | UHMK1   | UHMK1   | -       |
| hsa-miR-345 | UHRF1   | UHRF1   | -       |
| hsa-miR-345 | UMPS    | UMPS    | -       |
| hsa-miR-345 | UNC119B | UNC119B | -       |
| hsa-miR-345 | UNC13B  | UNC13B  | -       |
| hsa-miR-345 | UNC45B  | UNC45B  | -       |
| hsa-miR-345 | UNC5D   | UNC5D   | -       |
| hsa-miR-345 | UNC93A  | UNC93A  | -       |
| hsa-miR-345 | UPF2    | UPF2    | -       |

|             |         |        |         |
|-------------|---------|--------|---------|
| hsa-miR-345 | UPP1    | UPP1   | -       |
| hsa-miR-345 | UPRT    | UPRT   | -       |
| hsa-miR-345 | UQCC    | UQCC   | -       |
| hsa-miR-345 | UQCR11  | UQCR11 | -       |
| hsa-miR-345 | UQCRC2  | UQCRC2 | -       |
| hsa-miR-345 | USO1    | USO1   | -       |
| hsa-miR-345 | USP15   | USP15  | -       |
| hsa-miR-345 | USP2    | -      | USP2    |
| hsa-miR-345 | USP20   | -      | USP20   |
| hsa-miR-345 | USP32   | USP32  | -       |
| hsa-miR-345 | USP33   | USP33  | -       |
| hsa-miR-345 | USP45   | USP45  | -       |
| hsa-miR-345 | USP46   | USP46  | -       |
| hsa-miR-345 | USP50   | USP50  | -       |
| hsa-miR-345 | USP54   | USP54  | -       |
| hsa-miR-345 | USP6    | USP6   | -       |
| hsa-miR-345 | USP8    | USP8   | -       |
| hsa-miR-345 | UTY     | UTY    | -       |
| hsa-miR-345 | UVRAG   | UVRAG  | -       |
| hsa-miR-345 | VAPB    | VAPB   | -       |
| hsa-miR-345 | VGLL2   | VGLL2  | -       |
| hsa-miR-345 | VNN2    | -      | VNN2    |
| hsa-miR-345 | -       | VNN3   | VNN3    |
| hsa-miR-345 | VPS13D  | VPS13D | -       |
| hsa-miR-345 | -       | VPS28  | VPS28   |
| hsa-miR-345 | VPS37C  | VPS37C | -       |
| hsa-miR-345 | VRK3    | VRK3   | -       |
| hsa-miR-345 | VTN     | VTN    | -       |
| hsa-miR-345 | VWA3B   | VWA3B  | -       |
| hsa-miR-345 | WAC     | WAC    | -       |
| hsa-miR-345 | WBP2NL  | WBP2NL | -       |
| hsa-miR-345 | WBSCR16 | -      | WBSCR16 |
| hsa-miR-345 | WDFY1   | WDFY1  | -       |
| hsa-miR-345 | WDFY3   | WDFY3  | -       |
| hsa-miR-345 | WDR35   | WDR35  | -       |
| hsa-miR-345 | WDR43   | WDR43  | -       |
| hsa-miR-345 | WDR59   | WDR59  | -       |
| hsa-miR-345 | WDR5B   | WDR5B  | -       |
| hsa-miR-345 | WDR7    | WDR7   | -       |
| hsa-miR-345 | WHSC1   | WHSC1  | -       |
| hsa-miR-345 | WSCD2   | WSCD2  | -       |
| hsa-miR-345 | XIRP1   | XIRP1  | -       |
| hsa-miR-345 | XPC     | XPC    | -       |
| hsa-miR-345 | XPO7    | XPO7   | -       |
| hsa-miR-345 | YEATS2  | YEATS2 | -       |
| hsa-miR-345 | YIPF3   | -      | YIPF3   |
| hsa-miR-345 | YPEL2   | YPEL2  | -       |
| hsa-miR-345 | YTHDC1  | YTHDC1 | -       |
| hsa-miR-345 | YWHAB   | YWHAB  | -       |
| hsa-miR-345 | ZADH2   | ZADH2  | -       |
| hsa-miR-345 | ZAK     | ZAK    | -       |

|             |         |         |         |
|-------------|---------|---------|---------|
| hsa-miR-345 | ZBTB22  | -       | ZBTB22  |
| hsa-miR-345 | ZBTB42  | ZBTB42  | -       |
| hsa-miR-345 | ZBTB44  | ZBTB44  | -       |
| hsa-miR-345 | ZBTB5   | ZBTB5   | -       |
| hsa-miR-345 | ZC3H10  | ZC3H10  | -       |
| hsa-miR-345 | ZC3H12C | ZC3H12C | -       |
| hsa-miR-345 | ZC3H6   | ZC3H6   | -       |
| hsa-miR-345 | ZC3HAV1 | ZC3HAV1 | -       |
| hsa-miR-345 | ZDHHC16 | -       | ZDHHC16 |
| hsa-miR-345 | ZEB1    | ZEB1    | -       |
| hsa-miR-345 | ZEB2    | ZEB2    | -       |
| hsa-miR-345 | ZFAND1  | ZFAND1  | -       |
| hsa-miR-345 | ZFAT    | ZFAT    | -       |
| hsa-miR-345 | ZFC3H1  | ZFC3H1  | -       |
| hsa-miR-345 | ZFP28   | -       | ZFP28   |
| hsa-miR-345 | ZFP3    | -       | ZFP3    |
| hsa-miR-345 | ZFR2    | ZFR2    | -       |
| hsa-miR-345 | ZFYVE26 | ZFYVE26 | -       |
| hsa-miR-345 | ZMYM5   | ZMYM5   | -       |
| hsa-miR-345 | ZMYND12 | ZMYND12 | -       |
| hsa-miR-345 | ZNF12   | ZNF12   | -       |
| hsa-miR-345 | ZNF135  | ZNF135  | -       |
| hsa-miR-345 | ZNF14   | ZNF14   | -       |
| hsa-miR-345 | ZNF148  | ZNF148  | -       |
| hsa-miR-345 | ZNF192  | ZNF192  | -       |
| hsa-miR-345 | ZNF197  | ZNF197  | -       |
| hsa-miR-345 | ZNF217  | ZNF217  | -       |
| hsa-miR-345 | ZNF236  | ZNF236  | -       |
| hsa-miR-345 | ZNF276  | ZNF276  | -       |
| hsa-miR-345 | ZNF277  | ZNF277  | -       |
| hsa-miR-345 | ZNF280D | ZNF280D | -       |
| hsa-miR-345 | ZNF33A  | ZNF33A  | -       |
| hsa-miR-345 | ZNF341  | -       | ZNF341  |
| hsa-miR-345 | ZNF343  | -       | ZNF343  |
| hsa-miR-345 | ZNF365  | ZNF365  | -       |
| hsa-miR-345 | ZNF396  | ZNF396  | -       |
| hsa-miR-345 | ZNF397  | ZNF397  | -       |
| hsa-miR-345 | ZNF440  | ZNF440  | -       |
| hsa-miR-345 | ZNF45   | ZNF45   | -       |
| hsa-miR-345 | ZNF48   | ZNF48   | -       |
| hsa-miR-345 | ZNF514  | ZNF514  | -       |
| hsa-miR-345 | ZNF526  | ZNF526  | -       |
| hsa-miR-345 | ZNF532  | ZNF532  | -       |
| hsa-miR-345 | ZNF546  | ZNF546  | -       |
| hsa-miR-345 | ZNF552  | ZNF552  | -       |
| hsa-miR-345 | ZNF578  | ZNF578  | -       |
| hsa-miR-345 | ZNF587  | ZNF587  | -       |
| hsa-miR-345 | ZNF609  | ZNF609  | -       |
| hsa-miR-345 | ZNF620  | ZNF620  | -       |
| hsa-miR-345 | ZNF629  | ZNF629  | -       |
| hsa-miR-345 | ZNF667  | ZNF667  | -       |

|             |          |          |          |
|-------------|----------|----------|----------|
| hsa-miR-345 | ZNF681   | ZNF681   | -        |
| hsa-miR-345 | ZNF689   | ZNF689   | -        |
| hsa-miR-345 | ZNF69    | -        | ZNF69    |
| hsa-miR-345 | ZNF71    | -        | ZNF71    |
| hsa-miR-345 | ZNF720   | ZNF720   | -        |
| hsa-miR-345 | ZNF75D   | ZNF75D   | -        |
| hsa-miR-345 | ZNF765   | ZNF765   | -        |
| hsa-miR-345 | ZNF768   | ZNF768   | -        |
| hsa-miR-345 | ZNF793   | ZNF793   | -        |
| hsa-miR-345 | ZNF839   | ZNF839   | -        |
| hsa-miR-345 | ZNF841   | ZNF841   | -        |
| hsa-miR-345 | ZNF862   | ZNF862   | -        |
| hsa-miR-345 | ZNF879   | ZNF879   | -        |
| hsa-miR-345 | ZYG11B   | ZYG11B   | -        |
| hsa-miR-345 | ZZEF1    | ZZEF1    | -        |
| hsa-miR-34a | AAGAB    | AAGAB    | -        |
| hsa-miR-34a | ABCD1    | ABCD1    | -        |
| hsa-miR-34a | ABLIM1   | ABLIM1   | -        |
| hsa-miR-34a | ABR      | ABR      | -        |
| hsa-miR-34a | -        | ACAD11   | ACAD11   |
| hsa-miR-34a | ACBD3    | ACBD3    | -        |
| hsa-miR-34a | ACCN1    | ACCN1    | -        |
| hsa-miR-34a | ACSL1    | ACSL1    | -        |
| hsa-miR-34a | ACTR1A   | ACTR1A   | -        |
| hsa-miR-34a | -        | ACTR8    | ACTR8    |
| hsa-miR-34a | ADAM22   | ADAM22   | -        |
| hsa-miR-34a | -        | ADAMTS4  | ADAMTS4  |
| hsa-miR-34a | ADAMTSL4 | ADAMTSL4 | -        |
| hsa-miR-34a | ADAT2    | ADAT2    | -        |
| hsa-miR-34a | ADD2     | ADD2     | -        |
| hsa-miR-34a | ADIPOR2  | ADIPOR2  | -        |
| hsa-miR-34a | -        | ADK      | ADK      |
| hsa-miR-34a | ADO      | ADO      | -        |
| hsa-miR-34a | -        | ADRA1D   | ADRA1D   |
| hsa-miR-34a | AGAP2    | AGAP2    | -        |
| hsa-miR-34a | AHCYL2   | AHCYL2   | -        |
| hsa-miR-34a | -        | AIRE     | AIRE     |
| hsa-miR-34a | AK3      | AK3      | -        |
| hsa-miR-34a | AKAP6    | AKAP6    | -        |
| hsa-miR-34a | ALCAM    | ALCAM    | -        |
| hsa-miR-34a | ALG13    | ALG13    | -        |
| hsa-miR-34a | -        | ALOX5    | ALOX5    |
| hsa-miR-34a | -        | ALX3     | ALX3     |
| hsa-miR-34a | ANK2     | ANK2     | -        |
| hsa-miR-34a | ANP32A   | ANP32A   | -        |
| hsa-miR-34a | AP1S2    | AP1S2    | -        |
| hsa-miR-34a | -        | ARF3     | ARF3     |
| hsa-miR-34a | ARHGAP1  | ARHGAP1  | -        |
| hsa-miR-34a | ARHGAP26 | ARHGAP26 | -        |
| hsa-miR-34a | -        | ARHGAP30 | ARHGAP30 |
| hsa-miR-34a | ARHGAP36 | ARHGAP36 | -        |



|             |          |          |          |
|-------------|----------|----------|----------|
| hsa-miR-34a | -        | ARHGDIB  | ARHGDIB  |
| hsa-miR-34a | ARID4A   | ARID4A   | -        |
| hsa-miR-34a | ARID4B   | ARID4B   | -        |
| hsa-miR-34a | ARPP19   | ARPP19   | -        |
| hsa-miR-34a | -        | ARSJ     | ARSJ     |
| hsa-miR-34a | ASPHD2   | ASPHD2   | -        |
| hsa-miR-34a | ATG4B    | ATG4B    | -        |
| hsa-miR-34a | ATMIN    | ATMIN    | -        |
| hsa-miR-34a | -        | ATP13A1  | ATP13A1  |
| hsa-miR-34a | ATP1A2   | ATP1A2   | -        |
| hsa-miR-34a | -        | ATP8B4   | ATP8B4   |
| hsa-miR-34a | ATXN7    | ATXN7    | -        |
| hsa-miR-34a | ATXN7L3  | -        | ATXN7L3  |
| hsa-miR-34a | ATXN7L3B | ATXN7L3B | -        |
| hsa-miR-34a | -        | B3GALNT2 | B3GALNT2 |
| hsa-miR-34a | -        | B3GAT3   | B3GAT3   |
| hsa-miR-34a | -        | BAX      | BAX      |
| hsa-miR-34a | BAZ2A    | BAZ2A    | -        |
| hsa-miR-34a | -        | BBS1     | BBS1     |
| hsa-miR-34a | -        | BCAN     | BCAN     |
| hsa-miR-34a | -        | BCL2L14  | BCL2L14  |
| hsa-miR-34a | -        | BEST1    | BEST1    |
| hsa-miR-34a | -        | BEST2    | BEST2    |
| hsa-miR-34a | BMP3     | BMP3     | -        |
| hsa-miR-34a | BMP8B    | BMP8B    | -        |
| hsa-miR-34a | -        | BRI3     | BRI3     |
| hsa-miR-34a | BRPF3    | BRPF3    | -        |
| hsa-miR-34a | BTBD11   | BTBD11   | -        |
| hsa-miR-34a | -        | BTF3L1   | BTF3L1   |
| hsa-miR-34a | -        | BTG4     | BTG4     |
| hsa-miR-34a | C11orf95 | C11orf95 | -        |
| hsa-miR-34a | -        | C12orf57 | C12orf57 |
| hsa-miR-34a | C14orf28 | C14orf28 | -        |
| hsa-miR-34a | C14orf43 | C14orf43 | -        |
| hsa-miR-34a | C16orf5  | C16orf5  | -        |
| hsa-miR-34a | -        | C19orf28 | C19orf28 |
| hsa-miR-34a | C1orf144 | C1orf144 | -        |
| hsa-miR-34a | -        | C1orf163 | C1orf163 |
| hsa-miR-34a | C1orf183 | C1orf183 | -        |
| hsa-miR-34a | -        | C1orf26  | C1orf26  |
| hsa-miR-34a | -        | C1orf68  | C1orf68  |
| hsa-miR-34a | C2CD4A   | C2CD4A   | -        |
| hsa-miR-34a | -        | C2orf16  | C2orf16  |
| hsa-miR-34a | C3orf58  | C3orf58  | -        |
| hsa-miR-34a | C3orf62  | -        | C3orf62  |
| hsa-miR-34a | C3orf63  | C3orf63  | -        |
| hsa-miR-34a | C5orf43  | C5orf43  | -        |
| hsa-miR-34a | -        | C6orf153 | C6orf153 |
| hsa-miR-34a | -        | C6orf35  | C6orf35  |
| hsa-miR-34a | -        | C7orf27  | C7orf27  |
| hsa-miR-34a | -        | C7orf33  | C7orf33  |

|             |          |          |          |
|-------------|----------|----------|----------|
| hsa-miR-34a | -        | C7orf49  | C7orf49  |
| hsa-miR-34a | C8orf37  | C8orf37  | -        |
| hsa-miR-34a | C9orf125 | C9orf125 | -        |
| hsa-miR-34a | -        | C9orf25  | C9orf25  |
| hsa-miR-34a | -        | C9orf68  | C9orf68  |
| hsa-miR-34a | C9orf69  | C9orf69  | -        |
| hsa-miR-34a | CA7      | CA7      | -        |
| hsa-miR-34a | CACNA1E  | CACNA1E  | -        |
| hsa-miR-34a | CACNB1   | CACNB1   | -        |
| hsa-miR-34a | CADM4    | CADM4    | -        |
| hsa-miR-34a | -        | CALCA    | CALCA    |
| hsa-miR-34a | -        | CALCB    | CALCB    |
| hsa-miR-34a | CALCR    | CALCR    | -        |
| hsa-miR-34a | CAMSAP1  | -        | CAMSAP1  |
| hsa-miR-34a | CAMTA1   | CAMTA1   | -        |
| hsa-miR-34a | CAPN6    | CAPN6    | -        |
| hsa-miR-34a | -        | CAPN9    | CAPN9    |
| hsa-miR-34a | CASP2    | CASP2    | -        |
| hsa-miR-34a | CBFA2T3  | CBFA2T3  | -        |
| hsa-miR-34a | -        | CCDC28B  | CCDC28B  |
| hsa-miR-34a | -        | CCDC29   | CCDC29   |
| hsa-miR-34a | -        | CCDC52   | CCDC52   |
| hsa-miR-34a | CCDC88A  | CCDC88A  | -        |
| hsa-miR-34a | CCND1    | CCND1    | -        |
| hsa-miR-34a | CCNE2    | CCNE2    | -        |
| hsa-miR-34a | CCNJL    | CCNJL    | -        |
| hsa-miR-34a | -        | CD28     | CD28     |
| hsa-miR-34a | -        | CD3E     | CD3E     |
| hsa-miR-34a | -        | CD40     | CD40     |
| hsa-miR-34a | -        | CDA      | CDA      |
| hsa-miR-34a | -        | CDADC1   | CDADC1   |
| hsa-miR-34a | -        | CDK5RAP1 | CDK5RAP1 |
| hsa-miR-34a | -        | CDRT1    | CDRT1    |
| hsa-miR-34a | CELF3    | CELF3    | -        |
| hsa-miR-34a | CELF6    | CELF6    | -        |
| hsa-miR-34a | -        | CFLAR    | CFLAR    |
| hsa-miR-34a | CHD1     | CHD1     | -        |
| hsa-miR-34a | -        | CHD3     | CHD3     |
| hsa-miR-34a | CHMP7    | CHMP7    | -        |
| hsa-miR-34a | -        | CIAO1    | CIAO1    |
| hsa-miR-34a | -        | CLIP3    | CLIP3    |
| hsa-miR-34a | CLOCK    | CLOCK    | -        |
| hsa-miR-34a | CNTN2    | CNTN2    | -        |
| hsa-miR-34a | -        | CNTN3    | CNTN3    |
| hsa-miR-34a | CNTNAP1  | CNTNAP1  | -        |
| hsa-miR-34a | CNTNAP2  | CNTNAP2  | -        |
| hsa-miR-34a | -        | CNTNAP4  | CNTNAP4  |
| hsa-miR-34a | -        | CNTNAP5  | CNTNAP5  |
| hsa-miR-34a | COL12A1  | COL12A1  | -        |
| hsa-miR-34a | -        | COMMD4   | COMMD4   |
| hsa-miR-34a | CORO1C   | CORO1C   | -        |

|             |           |           |          |
|-------------|-----------|-----------|----------|
| hsa-miR-34a | CPD       | CPD       | -        |
| hsa-miR-34a | CR2       | CR2       | -        |
| hsa-miR-34a | -         | CRABP2    | CRABP2   |
| hsa-miR-34a | CREB3L1   | CREB3L1   | -        |
| hsa-miR-34a | CSF1R     | CSF1R     | -        |
| hsa-miR-34a | -         | CSHL1     | CSHL1    |
| hsa-miR-34a | -         | CSTF2     | CSTF2    |
| hsa-miR-34a | CTDSPL    | CTDSPL    | -        |
| hsa-miR-34a | -         | CTNNA3    | CTNNA3   |
| hsa-miR-34a | CTNND1    | CTNND1    | -        |
| hsa-miR-34a | CTNND2    | CTNND2    | -        |
| hsa-miR-34a | CTTNBP2NL | CTTNBP2NL | -        |
| hsa-miR-34a | CUX1      | CUX1      | -        |
| hsa-miR-34a | -         | CXCL11    | CXCL11   |
| hsa-miR-34a | -         | CYBASC3   | CYBASC3  |
| hsa-miR-34a | CYCS      | CYCS      | -        |
| hsa-miR-34a | -         | CYP4F8    | CYP4F8   |
| hsa-miR-34a | DAAM1     | DAAM1     | -        |
| hsa-miR-34a | -         | DAGLB     | DAGLB    |
| hsa-miR-34a | -         | DARC      | DARC     |
| hsa-miR-34a | DCAF7     | DCAF7     | -        |
| hsa-miR-34a | DCP1A     | DCP1A     | -        |
| hsa-miR-34a | -         | DDX10     | DDX10    |
| hsa-miR-34a | -         | DDX26B    | DDX26B   |
| hsa-miR-34a | -         | DECR2     | DECR2    |
| hsa-miR-34a | -         | DEDD2     | DEDD2    |
| hsa-miR-34a | -         | DEPDC5    | DEPDC5   |
| hsa-miR-34a | -         | DGAT1     | DGAT1    |
| hsa-miR-34a | -         | DGCR6     | DGCR6    |
| hsa-miR-34a | -         | DGCR6L    | DGCR6L   |
| hsa-miR-34a | DGKI      | DGKI      | -        |
| hsa-miR-34a | DGKZ      | DGKZ      | -        |
| hsa-miR-34a | -         | DHRS12    | DHRS12   |
| hsa-miR-34a | -         | DIDO1     | DIDO1    |
| hsa-miR-34a | -         | DIO1      | DIO1     |
| hsa-miR-34a | DIXDC1    | DIXDC1    | -        |
| hsa-miR-34a | -         | DMGDH     | DMGDH    |
| hsa-miR-34a | DMWD      | DMWD      | -        |
| hsa-miR-34a | DNAJB1    | DNAJB1    | -        |
| hsa-miR-34a | DNAJB2    | DNAJB2    | -        |
| hsa-miR-34a | DNAJC16   | DNAJC16   | -        |
| hsa-miR-34a | DNAJC24   | DNAJC24   | -        |
| hsa-miR-34a | DOCK3     | -         | DOCK3    |
| hsa-miR-34a | DPP3      | DPP3      | -        |
| hsa-miR-34a | -         | DYNC1LI1  | DYNC1LI1 |
| hsa-miR-34a | E2F3      | E2F3      | -        |
| hsa-miR-34a | E2F5      | E2F5      | -        |
| hsa-miR-34a | EEF2K     | EEF2K     | -        |
| hsa-miR-34a | EFNB1     | EFNB1     | -        |
| hsa-miR-34a | EHD4      | -         | EHD4     |
| hsa-miR-34a | -         | EIF2B5    | EIF2B5   |

|             |         |         |         |
|-------------|---------|---------|---------|
| hsa-miR-34a | EIF2C4  | EIF2C4  | -       |
| hsa-miR-34a | ELL2    | ELL2    | -       |
| hsa-miR-34a | -       | ELMO1   | ELMO1   |
| hsa-miR-34a | ELMOD1  | ELMOD1  | -       |
| hsa-miR-34a | -       | EME1    | EME1    |
| hsa-miR-34a | -       | EPS15L1 | EPS15L1 |
| hsa-miR-34a | ERGIC1  | ERGIC1  | -       |
| hsa-miR-34a | ERLIN1  | ERLIN1  | -       |
| hsa-miR-34a | ESRRA   | ESRRA   | -       |
| hsa-miR-34a | ESYT3   | ESYT3   | -       |
| hsa-miR-34a | F2RL2   | F2RL2   | -       |
| hsa-miR-34a | -       | FABP3   | FABP3   |
| hsa-miR-34a | FAM107A | FAM107A | -       |
| hsa-miR-34a | FAM117B | FAM117B | -       |
| hsa-miR-34a | FAM123B | FAM123B | -       |
| hsa-miR-34a | FAM167A | FAM167A | -       |
| hsa-miR-34a | FAM175B | FAM175B | -       |
| hsa-miR-34a | -       | FAM38B  | FAM38B  |
| hsa-miR-34a | FAM46A  | FAM46A  | -       |
| hsa-miR-34a | FAM70A  | FAM70A  | -       |
| hsa-miR-34a | FAM73B  | FAM73B  | -       |
| hsa-miR-34a | FAM76A  | FAM76A  | -       |
| hsa-miR-34a | -       | FARP2   | FARP2   |
| hsa-miR-34a | FAT2    | FAT2    | -       |
| hsa-miR-34a | -       | FBXL8   | FBXL8   |
| hsa-miR-34a | -       | FBXO16  | FBXO16  |
| hsa-miR-34a | -       | FBXO39  | FBXO39  |
| hsa-miR-34a | -       | FES     | FES     |
| hsa-miR-34a | -       | FETUB   | FETUB   |
| hsa-miR-34a | -       | FGD3    | FGD3    |
| hsa-miR-34a | FGF23   | FGF23   | -       |
| hsa-miR-34a | -       | FKBP6   | FKBP6   |
| hsa-miR-34a | FLOT2   | FLOT2   | -       |
| hsa-miR-34a | FNDC3B  | FNDC3B  | -       |
| hsa-miR-34a | FNDC5   | FNDC5   | -       |
| hsa-miR-34a | FNDC8   | -       | FNDC8   |
| hsa-miR-34a | FOSB    | -       | FOSB    |
| hsa-miR-34a | FOXG1   | FOXG1   | -       |
| hsa-miR-34a | FOXJ2   | FOXJ2   | -       |
| hsa-miR-34a | FOXP1   | FOXP1   | -       |
| hsa-miR-34a | FOXP2   | FOXP2   | -       |
| hsa-miR-34a | FOXQ1   | FOXQ1   | -       |
| hsa-miR-34a | -       | FOXR2   | FOXR2   |
| hsa-miR-34a | FRMD4A  | FRMD4A  | -       |
| hsa-miR-34a | -       | FXYD2   | FXYD2   |
| hsa-miR-34a | GAB1    | GAB1    | -       |
| hsa-miR-34a | GABRA3  | GABRA3  | -       |
| hsa-miR-34a | -       | GABRG3  | GABRG3  |
| hsa-miR-34a | GAS1    | GAS1    | -       |
| hsa-miR-34a | -       | GAS8    | GAS8    |
| hsa-miR-34a | -       | GBA3    | GBA3    |

|             |         |          |          |
|-------------|---------|----------|----------|
| hsa-miR-34a | GCH1    | GCH1     | -        |
| hsa-miR-34a | -       | GDF5     | GDF5     |
| hsa-miR-34a | -       | GHDC     | GHDC     |
| hsa-miR-34a | -       | GJB3     | GJB3     |
| hsa-miR-34a | GLCE    | GLCE     | -        |
| hsa-miR-34a | -       | GLRX5    | GLRX5    |
| hsa-miR-34a | GMFB    | GMFB     | -        |
| hsa-miR-34a | -       | GMIP     | GMIP     |
| hsa-miR-34a | GNAO1   | GNAO1    | -        |
| hsa-miR-34a | GOLPH3L | GOLPH3L  | -        |
| hsa-miR-34a | -       | GPR143   | GPR143   |
| hsa-miR-34a | GPR158  | GPR158   | -        |
| hsa-miR-34a | GPR85   | GPR85    | -        |
| hsa-miR-34a | -       | GPR98    | GPR98    |
| hsa-miR-34a | -       | GPS2     | GPS2     |
| hsa-miR-34a | GREM2   | GREM2    | -        |
| hsa-miR-34a | GRID1   | GRID1    | -        |
| hsa-miR-34a | -       | GRIN3B   | GRIN3B   |
| hsa-miR-34a | -       | GRM2     | GRM2     |
| hsa-miR-34a | GRM7    | GRM7     | -        |
| hsa-miR-34a | -       | GSC      | GSC      |
| hsa-miR-34a | GSG1    | GSG1     | -        |
| hsa-miR-34a | -       | GUCA2A   | GUCA2A   |
| hsa-miR-34a | -       | HAAO     | HAAO     |
| hsa-miR-34a | -       | HDAC1    | HDAC1    |
| hsa-miR-34a | HECW2   | HECW2    | -        |
| hsa-miR-34a | HK1     | -        | HK1      |
| hsa-miR-34a | -       | HLA-DQA1 | HLA-DQA1 |
| hsa-miR-34a | -       | HMBOX1   | HMBOX1   |
| hsa-miR-34a | HNF4G   | HNF4G    | -        |
| hsa-miR-34a | -       | HRH3     | HRH3     |
| hsa-miR-34a | HS2ST1  | HS2ST1   | -        |
| hsa-miR-34a | HSBP1   | HSBP1    | -        |
| hsa-miR-34a | -       | HSD11B2  | HSD11B2  |
| hsa-miR-34a | -       | HSPB6    | HSPB6    |
| hsa-miR-34a | HTR2C   | HTR2C    | -        |
| hsa-miR-34a | -       | IFI35    | IFI35    |
| hsa-miR-34a | -       | IGFBP1   | IGFBP1   |
| hsa-miR-34a | -       | IGHG1    | IGHG1    |
| hsa-miR-34a | -       | IKBKG    | IKBKG    |
| hsa-miR-34a | -       | IL16     | IL16     |
| hsa-miR-34a | IL6R    | IL6R     | -        |
| hsa-miR-34a | INA     | INA      | -        |
| hsa-miR-34a | -       | ING3     | ING3     |
| hsa-miR-34a | INHBB   | INHBB    | -        |
| hsa-miR-34a | -       | IRAK2    | IRAK2    |
| hsa-miR-34a | IRF1    | -        | IRF1     |
| hsa-miR-34a | -       | ITGB4    | ITGB4    |
| hsa-miR-34a | ITSN1   | ITSN1    | -        |
| hsa-miR-34a | JAG1    | JAG1     | -        |
| hsa-miR-34a | JHDM1D  | -        | JHDM1D   |

|             |           |           |          |
|-------------|-----------|-----------|----------|
| hsa-miR-34a | -         | JOSD2     | JOSD2    |
| hsa-miR-34a | JPH3      | JPH3      | -        |
| hsa-miR-34a | -         | KCNC3     | KCNC3    |
| hsa-miR-34a | -         | KCNG1     | KCNG1    |
| hsa-miR-34a | KCNH7     | KCNH7     | -        |
| hsa-miR-34a | -         | KCNJ8     | KCNJ8    |
| hsa-miR-34a | KCNK3     | KCNK3     | -        |
| hsa-miR-34a | -         | KCNK9     | KCNK9    |
| hsa-miR-34a | -         | KCNMA1    | KCNMA1   |
| hsa-miR-34a | KDM4C     | KDM4C     | -        |
| hsa-miR-34a | KIAA0753  | KIAA0753  | -        |
| hsa-miR-34a | KIAA1045  | -         | KIAA1045 |
| hsa-miR-34a | KIAA1210  | KIAA1210  | -        |
| hsa-miR-34a | KIAA1217  | KIAA1217  | -        |
| hsa-miR-34a | -         | KIAA1324  | KIAA1324 |
| hsa-miR-34a | KIAA1462  | KIAA1462  | -        |
| hsa-miR-34a | -         | KIAA1704  | KIAA1704 |
| hsa-miR-34a | -         | KIAA1949  | KIAA1949 |
| hsa-miR-34a | -         | KIF13A    | KIF13A   |
| hsa-miR-34a | -         | KIR2DL1   | KIR2DL1  |
| hsa-miR-34a | -         | KIR2DL4   | KIR2DL4  |
| hsa-miR-34a | -         | KIR3DL1   | KIR3DL1  |
| hsa-miR-34a | KITLG     | KITLG     | -        |
| hsa-miR-34a | KLHDC3    | KLHDC3    | -        |
| hsa-miR-34a | -         | KLHDC8B   | KLHDC8B  |
| hsa-miR-34a | -         | KLK13     | KLK13    |
| hsa-miR-34a | -         | KRT5      | KRT5     |
| hsa-miR-34a | -         | KY        | KY       |
| hsa-miR-34a | LDHA      | LDHA      | -        |
| hsa-miR-34a | LEF1      | LEF1      | -        |
| hsa-miR-34a | -         | LELP1     | LELP1    |
| hsa-miR-34a | LGI1      | LGI1      | -        |
| hsa-miR-34a | LHPP      | LHPP      | -        |
| hsa-miR-34a | LIMD2     | LIMD2     | -        |
| hsa-miR-34a | LMAN1     | LMAN1     | -        |
| hsa-miR-34a | LMAN2L    | LMAN2L    | -        |
| hsa-miR-34a | LOC647589 | LOC647589 | -        |
| hsa-miR-34a | -         | LONRF3    | LONRF3   |
| hsa-miR-34a | -         | LOXL3     | LOXL3    |
| hsa-miR-34a | LRCH1     | LRCH1     | -        |
| hsa-miR-34a | -         | LRFN5     | LRFN5    |
| hsa-miR-34a | -         | LRRC28    | LRRC28   |
| hsa-miR-34a | -         | LRRC3B    | LRRC3B   |
| hsa-miR-34a | LRRC40    | LRRC40    | -        |
| hsa-miR-34a | LRRC55    | LRRC55    | -        |
| hsa-miR-34a | LRRC56    | LRRC56    | -        |
| hsa-miR-34a | LRRC7     | LRRC7     | -        |
| hsa-miR-34a | LRRTM2    | LRRTM2    | -        |
| hsa-miR-34a | -         | LTF       | LTF      |
| hsa-miR-34a | LYPLAL1   | LYPLAL1   | -        |
| hsa-miR-34a | -         | LZTS2     | LZTS2    |

|             |         |          |          |
|-------------|---------|----------|----------|
| hsa-miR-34a | -       | MAL      | MAL      |
| hsa-miR-34a | -       | MANEA    | MANEA    |
| hsa-miR-34a | MAP1A   | MAP1A    | -        |
| hsa-miR-34a | MAP2K1  | MAP2K1   | -        |
| hsa-miR-34a | -       | MAP3K15  | MAP3K15  |
| hsa-miR-34a | MAP4K4  | MAP4K4   | -        |
| hsa-miR-34a | MAPT    | MAPT     | -        |
| hsa-miR-34a | MARCH5  | MARCH5   | -        |
| hsa-miR-34a | MARCH8  | MARCH8   | -        |
| hsa-miR-34a | -       | MARVELD3 | MARVELD3 |
| hsa-miR-34a | -       | MASP2    | MASP2    |
| hsa-miR-34a | MBD6    | MBD6     | -        |
| hsa-miR-34a | MBP     | MBP      | -        |
| hsa-miR-34a | -       | MED19    | MED19    |
| hsa-miR-34a | -       | MED8     | MED8     |
| hsa-miR-34a | -       | METTL1   | METTL1   |
| hsa-miR-34a | MEX3C   | MEX3C    | -        |
| hsa-miR-34a | MGAT4A  | MGAT4A   | -        |
| hsa-miR-34a | MGAT5B  | MGAT5B   | -        |
| hsa-miR-34a | MLLT3   | MLLT3    | -        |
| hsa-miR-34a | MMAB    | MMAB     | -        |
| hsa-miR-34a | -       | MOV10L1  | MOV10L1  |
| hsa-miR-34a | MPPED2  | MPPED2   | -        |
| hsa-miR-34a | -       | MRPL33   | MRPL33   |
| hsa-miR-34a | -       | MRVI1    | MRVI1    |
| hsa-miR-34a | MSL2    | MSL2     | -        |
| hsa-miR-34a | -       | MT1JP    | MT1JP    |
| hsa-miR-34a | MTA2    | MTA2     | -        |
| hsa-miR-34a | MTUS1   | MTUS1    | -        |
| hsa-miR-34a | MYADM   | MYADM    | -        |
| hsa-miR-34a | MYH9    | MYH9     | -        |
| hsa-miR-34a | -       | MYL4     | MYL4     |
| hsa-miR-34a | NAA50   | NAA50    | -        |
| hsa-miR-34a | -       | NAGPA    | NAGPA    |
| hsa-miR-34a | NAPEPLD | NAPEPLD  | -        |
| hsa-miR-34a | -       | NAT10    | NAT10    |
| hsa-miR-34a | NAV3    | NAV3     | -        |
| hsa-miR-34a | -       | NCBP2    | NCBP2    |
| hsa-miR-34a | NCDN    | NCDN     | -        |
| hsa-miR-34a | NCEH1   | NCEH1    | -        |
| hsa-miR-34a | NCOA1   | NCOA1    | -        |
| hsa-miR-34a | NDUFC2  | NDUFC2   | -        |
| hsa-miR-34a | -       | NEDD8    | NEDD8    |
| hsa-miR-34a | -       | NEDD9    | NEDD9    |
| hsa-miR-34a | NETO1   | NETO1    | -        |
| hsa-miR-34a | -       | NEU1     | NEU1     |
| hsa-miR-34a | NFE2L1  | NFE2L1   | -        |
| hsa-miR-34a | -       | NFKBIA   | NFKBIA   |
| hsa-miR-34a | -       | NKD2     | NKD2     |
| hsa-miR-34a | NKTR    | NKTR     | -        |
| hsa-miR-34a | -       | NLRC5    | NLRC5    |

|             |         |         |        |
|-------------|---------|---------|--------|
| hsa-miR-34a | -       | NOL10   | NOL10  |
| hsa-miR-34a | NOTCH1  | NOTCH1  | -      |
| hsa-miR-34a | NOTCH2  | NOTCH2  | -      |
| hsa-miR-34a | -       | NPY6R   | NPY6R  |
| hsa-miR-34a | -       | NR1I2   | NR1I2  |
| hsa-miR-34a | NR4A2   | NR4A2   | -      |
| hsa-miR-34a | NRXN2   | NRXN2   | -      |
| hsa-miR-34a | NSD1    | NSD1    | -      |
| hsa-miR-34a | NTN4    | NTN4    | -      |
| hsa-miR-34a | OLIG3   | OLIG3   | -      |
| hsa-miR-34a | -       | OPRM1   | OPRM1  |
| hsa-miR-34a | -       | OR2H1   | OR2H1  |
| hsa-miR-34a | ORMDL3  | ORMDL3  | -      |
| hsa-miR-34a | OSGIN2  | OSGIN2  | -      |
| hsa-miR-34a | -       | P2RY14  | P2RY14 |
| hsa-miR-34a | PACS1   | PACS1   | -      |
| hsa-miR-34a | PARD6B  | PARD6B  | -      |
| hsa-miR-34a | -       | PCBP4   | PCBP4  |
| hsa-miR-34a | PCLO    | PCLO    | -      |
| hsa-miR-34a | -       | PCSK7   | PCSK7  |
| hsa-miR-34a | PDE4B   | PDE4B   | -      |
| hsa-miR-34a | PDE7B   | PDE7B   | -      |
| hsa-miR-34a | PDGFRA  | PDGFRA  | -      |
| hsa-miR-34a | PDGFRB  | PDGFRB  | -      |
| hsa-miR-34a | -       | PDLIM2  | PDLIM2 |
| hsa-miR-34a | -       | PDLIM7  | PDLIM7 |
| hsa-miR-34a | PEA15   | PEA15   | -      |
| hsa-miR-34a | -       | PGAM1   | PGAM1  |
| hsa-miR-34a | -       | PGD     | PGD    |
| hsa-miR-34a | PGRMC2  | PGRMC2  | -      |
| hsa-miR-34a | PHF15   | PHF15   | -      |
| hsa-miR-34a | PID1    | PID1    | -      |
| hsa-miR-34a | -       | PIF1    | PIF1   |
| hsa-miR-34a | -       | PIGB    | PIGB   |
| hsa-miR-34a | PIGZ    | PIGZ    | -      |
| hsa-miR-34a | PIP5K1A | PIP5K1A | -      |
| hsa-miR-34a | PKIA    | PKIA    | -      |
| hsa-miR-34a | -       | PKN3    | PKN3   |
| hsa-miR-34a | PKNOX1  | PKNOX1  | -      |
| hsa-miR-34a | PKP4    | PKP4    | -      |
| hsa-miR-34a | PLA2G15 | PLA2G15 | -      |
| hsa-miR-34a | -       | PLA2G6  | PLA2G6 |
| hsa-miR-34a | PLAG1   | PLAG1   | -      |
| hsa-miR-34a | -       | PLAGL1  | PLAGL1 |
| hsa-miR-34a | PLCG1   | PLCG1   | -      |
| hsa-miR-34a | PLEKHH2 | PLEKHH2 | -      |
| hsa-miR-34a | PLOD1   | PLOD1   | -      |
| hsa-miR-34a | PODXL   | PODXL   | -      |
| hsa-miR-34a | POGZ    | POGZ    | -      |
| hsa-miR-34a | -       | POMZP3  | POMZP3 |
| hsa-miR-34a | -       | PPARG   | PPARG  |



|             |           |           |          |
|-------------|-----------|-----------|----------|
| hsa-miR-34a | PPARGC1B  | PPARGC1B  | -        |
| hsa-miR-34a | PPFIA1    | PPFIA1    | -        |
| hsa-miR-34a | PPM1A     | PPM1A     | -        |
| hsa-miR-34a | PPP1R10   | PPP1R10   | -        |
| hsa-miR-34a | PPP1R11   | PPP1R11   | -        |
| hsa-miR-34a | -         | PPP1R14D  | PPP1R14D |
| hsa-miR-34a | PPP2R3A   | PPP2R3A   | -        |
| hsa-miR-34a | -         | PPP2R5D   | PPP2R5D  |
| hsa-miR-34a | -         | PRKCH     | PRKCH    |
| hsa-miR-34a | PRKD1     | PRKD1     | -        |
| hsa-miR-34a | -         | PRLR      | PRLR     |
| hsa-miR-34a | -         | PRMT2     | PRMT2    |
| hsa-miR-34a | -         | PRR11     | PRR11    |
| hsa-miR-34a | -         | PRSS21    | PRSS21   |
| hsa-miR-34a | -         | PSME1     | PSME1    |
| hsa-miR-34a | -         | PTCHD2    | PTCHD2   |
| hsa-miR-34a | PTPRD     | PTPRD     | -        |
| hsa-miR-34a | PTPRM     | PTPRM     | -        |
| hsa-miR-34a | -         | PTRH1     | PTRH1    |
| hsa-miR-34a | PVRL1     | PVRL1     | -        |
| hsa-miR-34a | -         | PVRL2     | PVRL2    |
| hsa-miR-34a | ProSAPiP1 | ProSAPiP1 | -        |
| hsa-miR-34a | -         | RAD9A     | RAD9A    |
| hsa-miR-34a | RAE1      | RAE1      | -        |
| hsa-miR-34a | -         | RAI2      | RAI2     |
| hsa-miR-34a | RALGPS1   | -         | RALGPS1  |
| hsa-miR-34a | -         | RALY      | RALY     |
| hsa-miR-34a | RANBP10   | RANBP10   | -        |
| hsa-miR-34a | RAP1GAP   | RAP1GAP   | -        |
| hsa-miR-34a | RAP1GDS1  | RAP1GDS1  | -        |
| hsa-miR-34a | RARB      | RARB      | -        |
| hsa-miR-34a | -         | RASGEF1C  | RASGEF1C |
| hsa-miR-34a | RASGRP4   | RASGRP4   | -        |
| hsa-miR-34a | -         | RBBP7     | RBBP7    |
| hsa-miR-34a | -         | RBM28     | RBM28    |
| hsa-miR-34a | RCAN1     | RCAN1     | -        |
| hsa-miR-34a | RELN      | RELN      | -        |
| hsa-miR-34a | -         | REPS1     | REPS1    |
| hsa-miR-34a | RET       | RET       | -        |
| hsa-miR-34a | RGMB      | RGMB      | -        |
| hsa-miR-34a | RGS17     | RGS17     | -        |
| hsa-miR-34a | -         | RHBG      | RHBG     |
| hsa-miR-34a | -         | RHOJ      | RHOJ     |
| hsa-miR-34a | RIC8B     | RIC8B     | -        |
| hsa-miR-34a | -         | RNASE11   | RNASE11  |
| hsa-miR-34a | RNF213    | -         | RNF213   |
| hsa-miR-34a | RNF41     | RNF41     | -        |
| hsa-miR-34a | ROCK1     | ROCK1     | -        |
| hsa-miR-34a | -         | RPL13A    | RPL13A   |
| hsa-miR-34a | -         | RPS24     | RPS24    |
| hsa-miR-34a | RPS6KL1   | RPS6KL1   | -        |

|             |          |          |          |
|-------------|----------|----------|----------|
| hsa-miR-34a | RSPO4    | RSPO4    | -        |
| hsa-miR-34a | RTN4RL1  | RTN4RL1  | -        |
| hsa-miR-34a | -        | SAMD3    | SAMD3    |
| hsa-miR-34a | SAR1A    | SAR1A    | -        |
| hsa-miR-34a | SATB1    | SATB1    | -        |
| hsa-miR-34a | SATB2    | SATB2    | -        |
| hsa-miR-34a | SCML2    | SCML2    | -        |
| hsa-miR-34a | SCN1A    | -        | SCN1A    |
| hsa-miR-34a | SCN2B    | SCN2B    | -        |
| hsa-miR-34a | -        | SCNN1D   | SCNN1D   |
| hsa-miR-34a | SEMA4B   | SEMA4B   | -        |
| hsa-miR-34a | SEMA4F   | SEMA4F   | -        |
| hsa-miR-34a | -        | SENP3    | SENP3    |
| hsa-miR-34a | SEPT3    | SEPT3    | -        |
| hsa-miR-34a | SERPINF2 | SERPINF2 | -        |
| hsa-miR-34a | SGSM2    | SGSM2    | -        |
| hsa-miR-34a | SGTA     | SGTA     | -        |
| hsa-miR-34a | -        | SHOX     | SHOX     |
| hsa-miR-34a | SIDT1    | SIDT1    | -        |
| hsa-miR-34a | SIDT2    | SIDT2    | -        |
| hsa-miR-34a | -        | SIGLECP3 | SIGLECP3 |
| hsa-miR-34a | SIPA1    | SIPA1    | -        |
| hsa-miR-34a | -        | SLC23A2  | SLC23A2  |
| hsa-miR-34a | SLC25A27 | SLC25A27 | -        |
| hsa-miR-34a | SLC2A4RG | SLC2A4RG | -        |
| hsa-miR-34a | -        | SLC2A8   | SLC2A8   |
| hsa-miR-34a | SLC30A3  | SLC30A3  | -        |
| hsa-miR-34a | -        | SLC35E2  | SLC35E2  |
| hsa-miR-34a | -        | SLC3A1   | SLC3A1   |
| hsa-miR-34a | SLC44A2  | SLC44A2  | -        |
| hsa-miR-34a | SLC4A7   | SLC4A7   | -        |
| hsa-miR-34a | -        | SLC5A10  | SLC5A10  |
| hsa-miR-34a | SLC6A1   | SLC6A1   | -        |
| hsa-miR-34a | -        | SLC6A12  | SLC6A12  |
| hsa-miR-34a | SLC6A17  | SLC6A17  | -        |
| hsa-miR-34a | -        | SLC7A10  | SLC7A10  |
| hsa-miR-34a | SLC7A6   | SLC7A6   | -        |
| hsa-miR-34a | SMAD4    | SMAD4    | -        |
| hsa-miR-34a | -        | SMPD1    | SMPD1    |
| hsa-miR-34a | -        | SMTNL2   | SMTNL2   |
| hsa-miR-34a | -        | SNAI3    | SNAI3    |
| hsa-miR-34a | -        | SNCG     | SNCG     |
| hsa-miR-34a | SNX4     | SNX4     | -        |
| hsa-miR-34a | SOX4     | SOX4     | -        |
| hsa-miR-34a | SP2      | SP2      | -        |
| hsa-miR-34a | -        | SPATA20  | SPATA20  |
| hsa-miR-34a | SPCS2    | SPCS2    | -        |
| hsa-miR-34a | SPEG     | SPEG     | -        |
| hsa-miR-34a | SPRN     | SPRN     | -        |
| hsa-miR-34a | SPRY3    | SPRY3    | -        |
| hsa-miR-34a | SRC      | SRC      | -        |

|             |          |          |          |
|-------------|----------|----------|----------|
| hsa-miR-34a | SRCIN1   | SRCIN1   | -        |
| hsa-miR-34a | SRPR     | SRPR     | -        |
| hsa-miR-34a | -        | SSX5     | SSX5     |
| hsa-miR-34a | STAC2    | STAC2    | -        |
| hsa-miR-34a | STK38L   | STK38L   | -        |
| hsa-miR-34a | STX17    | STX17    | -        |
| hsa-miR-34a | STX1A    | STX1A    | -        |
| hsa-miR-34a | -        | STX8     | STX8     |
| hsa-miR-34a | SVIP     | SVIP     | -        |
| hsa-miR-34a | SVOP     | SVOP     | -        |
| hsa-miR-34a | SYN2     | SYN2     | -        |
| hsa-miR-34a | SYNJ1    | SYNJ1    | -        |
| hsa-miR-34a | SYT1     | SYT1     | -        |
| hsa-miR-34a | SYT9     | SYT9     | -        |
| hsa-miR-34a | TAF4B    | TAF4B    | -        |
| hsa-miR-34a | -        | TAGLN    | TAGLN    |
| hsa-miR-34a | -        | TAL2     | TAL2     |
| hsa-miR-34a | TANC2    | TANC2    | -        |
| hsa-miR-34a | -        | TBC1D2   | TBC1D2   |
| hsa-miR-34a | TBC1D30  | TBC1D30  | -        |
| hsa-miR-34a | -        | TBCA     | TBCA     |
| hsa-miR-34a | TBCK     | TBCK     | -        |
| hsa-miR-34a | TBL1XR1  | TBL1XR1  | -        |
| hsa-miR-34a | -        | TBL3     | TBL3     |
| hsa-miR-34a | -        | TBXAS1   | TBXAS1   |
| hsa-miR-34a | TCF12    | TCF12    | -        |
| hsa-miR-34a | -        | TDRD1    | TDRD1    |
| hsa-miR-34a | -        | TENC1    | TENC1    |
| hsa-miR-34a | -        | TESK1    | TESK1    |
| hsa-miR-34a | -        | TEX264   | TEX264   |
| hsa-miR-34a | -        | TGFBI    | TGFBI    |
| hsa-miR-34a | -        | TGFBR3   | TGFBR3   |
| hsa-miR-34a | TGIF2    | TGIF2    | -        |
| hsa-miR-34a | -        | TGM6     | TGM6     |
| hsa-miR-34a | -        | THPO     | THPO     |
| hsa-miR-34a | -        | THSD4    | THSD4    |
| hsa-miR-34a | -        | TIMM17B  | TIMM17B  |
| hsa-miR-34a | -        | TINF2    | TINF2    |
| hsa-miR-34a | -        | TM9SF2   | TM9SF2   |
| hsa-miR-34a | TMCC3    | TMCC3    | -        |
| hsa-miR-34a | -        | TMEFF1   | TMEFF1   |
| hsa-miR-34a | -        | TMEM126B | TMEM126B |
| hsa-miR-34a | -        | TMEM130  | TMEM130  |
| hsa-miR-34a | TMEM200B | TMEM200B | -        |
| hsa-miR-34a | -        | TMEM22   | TMEM22   |
| hsa-miR-34a | -        | TMEM25   | TMEM25   |
| hsa-miR-34a | -        | TMEM55B  | TMEM55B  |
| hsa-miR-34a | -        | TMEM59L  | TMEM59L  |
| hsa-miR-34a | -        | TMEM79   | TMEM79   |
| hsa-miR-34a | -        | TMEM91   | TMEM91   |
| hsa-miR-34a | -        | TNFRSF19 | TNFRSF19 |

|             |          |          |          |
|-------------|----------|----------|----------|
| hsa-miR-34a | TNRC18   | TNRC18   | -        |
| hsa-miR-34a | TOM1     | TOM1     | -        |
| hsa-miR-34a | TOX      | TOX      | -        |
| hsa-miR-34a | TP53INP2 | TP53INP2 | -        |
| hsa-miR-34a | TPD52    | TPD52    | -        |
| hsa-miR-34a | -        | TPD52L3  | TPD52L3  |
| hsa-miR-34a | -        | TRAF3IP3 | TRAF3IP3 |
| hsa-miR-34a | TRANK1   | TRANK1   | -        |
| hsa-miR-34a | -        | TRIM21   | TRIM21   |
| hsa-miR-34a | -        | TRIM29   | TRIM29   |
| hsa-miR-34a | TRIM67   | TRIM67   | -        |
| hsa-miR-34a | TRIM9    | TRIM9    | -        |
| hsa-miR-34a | TSHZ2    | TSHZ2    | -        |
| hsa-miR-34a | TSN      | TSN      | -        |
| hsa-miR-34a | -        | TSPAN33  | TSPAN33  |
| hsa-miR-34a | -        | TTC15    | TTC15    |
| hsa-miR-34a | TTC19    | TTC19    | -        |
| hsa-miR-34a | -        | TUBA3C   | TUBA3C   |
| hsa-miR-34a | TUSC5    | TUSC5    | -        |
| hsa-miR-34a | -        | TXNDC9   | TXNDC9   |
| hsa-miR-34a | -        | TXNL1    | TXNL1    |
| hsa-miR-34a | -        | UBE2NL   | UBE2NL   |
| hsa-miR-34a | UBP1     | UBP1     | -        |
| hsa-miR-34a | UCK2     | -        | UCK2     |
| hsa-miR-34a | -        | UCN2     | UCN2     |
| hsa-miR-34a | -        | ULBP2    | ULBP2    |
| hsa-miR-34a | -        | UNC119   | UNC119   |
| hsa-miR-34a | -        | UNC45A   | UNC45A   |
| hsa-miR-34a | UNG      | UNG      | -        |
| hsa-miR-34a | USF1     | USF1     | -        |
| hsa-miR-34a | USP31    | USP31    | -        |
| hsa-miR-34a | VAMP2    | VAMP2    | -        |
| hsa-miR-34a | VAT1     | VAT1     | -        |
| hsa-miR-34a | VCL      | VCL      | -        |
| hsa-miR-34a | -        | VPS4A    | VPS4A    |
| hsa-miR-34a | -        | VPS52    | VPS52    |
| hsa-miR-34a | VTCN1    | VTCN1    | -        |
| hsa-miR-34a | VTI1A    | VTI1A    | -        |
| hsa-miR-34a | VWA5B2   | VWA5B2   | -        |
| hsa-miR-34a | WASF1    | WASF1    | -        |
| hsa-miR-34a | -        | WFDC5    | WFDC5    |
| hsa-miR-34a | -        | WISP2    | WISP2    |
| hsa-miR-34a | WSCD2    | WSCD2    | -        |
| hsa-miR-34a | WTAP     | WTAP     | -        |
| hsa-miR-34a | -        | XBP1     | XBP1     |
| hsa-miR-34a | XPO5     | XPO5     | -        |
| hsa-miR-34a | XYLT1    | XYLT1    | -        |
| hsa-miR-34a | YY1      | YY1      | -        |
| hsa-miR-34a | ZC3H4    | ZC3H4    | -        |
| hsa-miR-34a | ZDHHC17  | ZDHHC17  | -        |
| hsa-miR-34a | ZDHHC23  | ZDHHC23  | -        |

|              |         |          |          |
|--------------|---------|----------|----------|
| hsa-miR-34a  | -       | ZDHHC8   | ZDHHC8   |
| hsa-miR-34a  | -       | ZFAND1   | ZFAND1   |
| hsa-miR-34a  | ZFHX4   | ZFHX4    | -        |
| hsa-miR-34a  | -       | ZFPL1    | ZFPL1    |
| hsa-miR-34a  | ZMYM4   | ZMYM4    | -        |
| hsa-miR-34a  | -       | ZNF16    | ZNF16    |
| hsa-miR-34a  | -       | ZNF193   | ZNF193   |
| hsa-miR-34a  | -       | ZNF207   | ZNF207   |
| hsa-miR-34a  | ZNF282  | ZNF282   | -        |
| hsa-miR-34a  | ZNF304  | ZNF304   | -        |
| hsa-miR-34a  | -       | ZNF358   | ZNF358   |
| hsa-miR-34a  | -       | ZNF513   | ZNF513   |
| hsa-miR-34a  | -       | ZNF551   | ZNF551   |
| hsa-miR-34a  | ZNF641  | ZNF641   | -        |
| hsa-miR-34a  | ZNF644  | ZNF644   | -        |
| hsa-miR-34a  | -       | ZNF672   | ZNF672   |
| hsa-miR-34a  | -       | ZNF707   | ZNF707   |
| hsa-miR-34a  | -       | ZNF800   | ZNF800   |
| hsa-miR-34a  | ZSCAN29 | ZSCAN29  | -        |
| hsa-miR-34a  | ZYG11B  | ZYG11B   | -        |
| hsa-miR-363* | -       | AARSD1   | AARSD1   |
| hsa-miR-363* | -       | ACBD6    | ACBD6    |
| hsa-miR-363* | -       | ACTR10   | ACTR10   |
| hsa-miR-363* | -       | ADCK1    | ADCK1    |
| hsa-miR-363* | -       | ADRA1A   | ADRA1A   |
| hsa-miR-363* | -       | AKNA     | AKNA     |
| hsa-miR-363* | -       | ALDH3A1  | ALDH3A1  |
| hsa-miR-363* | -       | ANGPT2   | ANGPT2   |
| hsa-miR-363* | -       | ANKHD1   | ANKHD1   |
| hsa-miR-363* | -       | ANKS1B   | ANKS1B   |
| hsa-miR-363* | -       | ANXA4    | ANXA4    |
| hsa-miR-363* | -       | AP4M1    | AP4M1    |
| hsa-miR-363* | -       | AQP3     | AQP3     |
| hsa-miR-363* | -       | ARHGDI1B | ARHGDI1B |
| hsa-miR-363* | -       | ARMCX6   | ARMCX6   |
| hsa-miR-363* | -       | ATCAY    | ATCAY    |
| hsa-miR-363* | -       | ATP2B2   | ATP2B2   |
| hsa-miR-363* | -       | ATP6V0D2 | ATP6V0D2 |
| hsa-miR-363* | -       | ATPAF2   | ATPAF2   |
| hsa-miR-363* | -       | BAD      | BAD      |
| hsa-miR-363* | -       | BCAS4    | BCAS4    |
| hsa-miR-363* | -       | BTD      | BTD      |
| hsa-miR-363* | -       | BUD31    | BUD31    |
| hsa-miR-363* | -       | C11orf17 | C11orf17 |
| hsa-miR-363* | -       | C1orf55  | C1orf55  |
| hsa-miR-363* | -       | C21orf49 | C21orf49 |
| hsa-miR-363* | -       | C6orf164 | C6orf164 |
| hsa-miR-363* | -       | CADM4    | CADM4    |
| hsa-miR-363* | -       | CAMK1G   | CAMK1G   |
| hsa-miR-363* | -       | CASP8    | CASP8    |
| hsa-miR-363* | -       | CCBP2    | CCBP2    |

|              |   |           |           |
|--------------|---|-----------|-----------|
| hsa-miR-363* | - | CCDC106   | CCDC106   |
| hsa-miR-363* | - | CCDC122   | CCDC122   |
| hsa-miR-363* | - | CCL14     | CCL14     |
| hsa-miR-363* | - | CCL19     | CCL19     |
| hsa-miR-363* | - | CD74      | CD74      |
| hsa-miR-363* | - | CIITA     | CIITA     |
| hsa-miR-363* | - | CKM       | CKM       |
| hsa-miR-363* | - | CLEC4D    | CLEC4D    |
| hsa-miR-363* | - | COPG      | COPG      |
| hsa-miR-363* | - | CPZ       | CPZ       |
| hsa-miR-363* | - | CR1       | CR1       |
| hsa-miR-363* | - | CRB3      | CRB3      |
| hsa-miR-363* | - | CYP17A1   | CYP17A1   |
| hsa-miR-363* | - | CYP1A2    | CYP1A2    |
| hsa-miR-363* | - | CYP51A1   | CYP51A1   |
| hsa-miR-363* | - | DEDD      | DEDD      |
| hsa-miR-363* | - | DLGAP1    | DLGAP1    |
| hsa-miR-363* | - | DNAJC14   | DNAJC14   |
| hsa-miR-363* | - | DNAJC17   | DNAJC17   |
| hsa-miR-363* | - | DOK3      | DOK3      |
| hsa-miR-363* | - | DTNB      | DTNB      |
| hsa-miR-363* | - | DUSP11    | DUSP11    |
| hsa-miR-363* | - | ECE2      | ECE2      |
| hsa-miR-363* | - | EGFL7     | EGFL7     |
| hsa-miR-363* | - | EVPL      | EVPL      |
| hsa-miR-363* | - | EXOSC5    | EXOSC5    |
| hsa-miR-363* | - | EXOSC6    | EXOSC6    |
| hsa-miR-363* | - | FAAH      | FAAH      |
| hsa-miR-363* | - | FAM109B   | FAM109B   |
| hsa-miR-363* | - | FCAMR     | FCAMR     |
| hsa-miR-363* | - | FCAR      | FCAR      |
| hsa-miR-363* | - | FFAR3     | FFAR3     |
| hsa-miR-363* | - | FLAD1     | FLAD1     |
| hsa-miR-363* | - | FLOT1     | FLOT1     |
| hsa-miR-363* | - | FOSL1     | FOSL1     |
| hsa-miR-363* | - | FOXR1     | FOXR1     |
| hsa-miR-363* | - | FTCD      | FTCD      |
| hsa-miR-363* | - | FXR2      | FXR2      |
| hsa-miR-363* | - | GBA2      | GBA2      |
| hsa-miR-363* | - | GFRAL     | GFRAL     |
| hsa-miR-363* | - | GHR       | GHR       |
| hsa-miR-363* | - | GNG3      | GNG3      |
| hsa-miR-363* | - | GNG4      | GNG4      |
| hsa-miR-363* | - | GP6       | GP6       |
| hsa-miR-363* | - | GSG1      | GSG1      |
| hsa-miR-363* | - | GSTO2     | GSTO2     |
| hsa-miR-363* | - | GTF2E1    | GTF2E1    |
| hsa-miR-363* | - | HIF3A     | HIF3A     |
| hsa-miR-363* | - | HIPK4     | HIPK4     |
| hsa-miR-363* | - | HIST2H2BE | HIST2H2BE |
| hsa-miR-363* | - | HN1L      | HN1L      |

|              |   |           |           |
|--------------|---|-----------|-----------|
| hsa-miR-363* | - | HOXB3     | HOXB3     |
| hsa-miR-363* | - | HSD3B1    | HSD3B1    |
| hsa-miR-363* | - | HSD3B2    | HSD3B2    |
| hsa-miR-363* | - | HSF2BP    | HSF2BP    |
| hsa-miR-363* | - | HSPA1L    | HSPA1L    |
| hsa-miR-363* | - | IFLTD1    | IFLTD1    |
| hsa-miR-363* | - | IL11RA    | IL11RA    |
| hsa-miR-363* | - | IL12RB1   | IL12RB1   |
| hsa-miR-363* | - | IL16      | IL16      |
| hsa-miR-363* | - | IMPA2     | IMPA2     |
| hsa-miR-363* | - | INHBE     | INHBE     |
| hsa-miR-363* | - | INMT      | INMT      |
| hsa-miR-363* | - | IPO13     | IPO13     |
| hsa-miR-363* | - | KAAG1     | KAAG1     |
| hsa-miR-363* | - | KCNK17    | KCNK17    |
| hsa-miR-363* | - | KCTD13    | KCTD13    |
| hsa-miR-363* | - | KIAA0467  | KIAA0467  |
| hsa-miR-363* | - | KLF1      | KLF1      |
| hsa-miR-363* | - | KLK12     | KLK12     |
| hsa-miR-363* | - | KPNA2     | KPNA2     |
| hsa-miR-363* | - | KRT14     | KRT14     |
| hsa-miR-363* | - | LBP       | LBP       |
| hsa-miR-363* | - | LCN6      | LCN6      |
| hsa-miR-363* | - | LDB1      | LDB1      |
| hsa-miR-363* | - | LIMS1     | LIMS1     |
| hsa-miR-363* | - | LLGL1     | LLGL1     |
| hsa-miR-363* | - | LOC728660 | LOC728660 |
| hsa-miR-363* | - | LRRC3B    | LRRC3B    |
| hsa-miR-363* | - | LRRC47    | LRRC47    |
| hsa-miR-363* | - | LYZ       | LYZ       |
| hsa-miR-363* | - | MAN2A1    | MAN2A1    |
| hsa-miR-363* | - | MANSC1    | MANSC1    |
| hsa-miR-363* | - | MAP1LC3C  | MAP1LC3C  |
| hsa-miR-363* | - | MAP3K13   | MAP3K13   |
| hsa-miR-363* | - | MAP9      | MAP9      |
| hsa-miR-363* | - | MASP2     | MASP2     |
| hsa-miR-363* | - | MBD6      | MBD6      |
| hsa-miR-363* | - | MED18     | MED18     |
| hsa-miR-363* | - | MEF2B     | MEF2B     |
| hsa-miR-363* | - | MEFV      | MEFV      |
| hsa-miR-363* | - | MOGAT3    | MOGAT3    |
| hsa-miR-363* | - | MPP1      | MPP1      |
| hsa-miR-363* | - | MRPL44    | MRPL44    |
| hsa-miR-363* | - | MTHFD1L   | MTHFD1L   |
| hsa-miR-363* | - | MZF1      | MZF1      |
| hsa-miR-363* | - | NAGK      | NAGK      |
| hsa-miR-363* | - | NANOG     | NANOG     |
| hsa-miR-363* | - | NELL1     | NELL1     |
| hsa-miR-363* | - | NEUROD6   | NEUROD6   |
| hsa-miR-363* | - | NPM1      | NPM1      |
| hsa-miR-363* | - | NPY       | NPY       |

|              |   |          |          |
|--------------|---|----------|----------|
| hsa-miR-363* | - | NRAP     | NRAP     |
| hsa-miR-363* | - | NRG1     | NRG1     |
| hsa-miR-363* | - | NRP2     | NRP2     |
| hsa-miR-363* | - | NT5DC2   | NT5DC2   |
| hsa-miR-363* | - | NXF3     | NXF3     |
| hsa-miR-363* | - | OBFC2B   | OBFC2B   |
| hsa-miR-363* | - | OR51E2   | OR51E2   |
| hsa-miR-363* | - | PAOX     | PAOX     |
| hsa-miR-363* | - | PCBP2    | PCBP2    |
| hsa-miR-363* | - | PCDHB11  | PCDHB11  |
| hsa-miR-363* | - | PCP4     | PCP4     |
| hsa-miR-363* | - | PDLIM4   | PDLIM4   |
| hsa-miR-363* | - | PFDN2    | PFDN2    |
| hsa-miR-363* | - | PFKFB3   | PFKFB3   |
| hsa-miR-363* | - | PKD1L2   | PKD1L2   |
| hsa-miR-363* | - | PLA2G2A  | PLA2G2A  |
| hsa-miR-363* | - | PLCB2    | PLCB2    |
| hsa-miR-363* | - | PLCD1    | PLCD1    |
| hsa-miR-363* | - | PNPO     | PNPO     |
| hsa-miR-363* | - | POU2F3   | POU2F3   |
| hsa-miR-363* | - | PPEF2    | PPEF2    |
| hsa-miR-363* | - | PPID     | PPID     |
| hsa-miR-363* | - | PPP2R1A  | PPP2R1A  |
| hsa-miR-363* | - | PRDX5    | PRDX5    |
| hsa-miR-363* | - | PREP     | PREP     |
| hsa-miR-363* | - | PRPS1    | PRPS1    |
| hsa-miR-363* | - | PRRT1    | PRRT1    |
| hsa-miR-363* | - | PRSS36   | PRSS36   |
| hsa-miR-363* | - | PSRC1    | PSRC1    |
| hsa-miR-363* | - | PTCRA    | PTCRA    |
| hsa-miR-363* | - | RAB25    | RAB25    |
| hsa-miR-363* | - | RC3H2    | RC3H2    |
| hsa-miR-363* | - | RHOF     | RHOF     |
| hsa-miR-363* | - | RMND5B   | RMND5B   |
| hsa-miR-363* | - | SARDH    | SARDH    |
| hsa-miR-363* | - | SCNN1B   | SCNN1B   |
| hsa-miR-363* | - | SFXN1    | SFXN1    |
| hsa-miR-363* | - | SHOX     | SHOX     |
| hsa-miR-363* | - | SLC12A8  | SLC12A8  |
| hsa-miR-363* | - | SLC22A17 | SLC22A17 |
| hsa-miR-363* | - | SLC25A23 | SLC25A23 |
| hsa-miR-363* | - | SLC25A45 | SLC25A45 |
| hsa-miR-363* | - | SLC30A6  | SLC30A6  |
| hsa-miR-363* | - | SLC35D2  | SLC35D2  |
| hsa-miR-363* | - | SLC5A10  | SLC5A10  |
| hsa-miR-363* | - | SMPDL3B  | SMPDL3B  |
| hsa-miR-363* | - | SNX15    | SNX15    |
| hsa-miR-363* | - | SOCS7    | SOCS7    |
| hsa-miR-363* | - | SPAG11A  | SPAG11A  |
| hsa-miR-363* | - | SPAG11B  | SPAG11B  |
| hsa-miR-363* | - | SSX2IP   | SSX2IP   |



|                |   |         |         |
|----------------|---|---------|---------|
| hsa-miR-363*   | - | ST8SIA4 | ST8SIA4 |
| hsa-miR-363*   | - | STMN4   | STMN4   |
| hsa-miR-363*   | - | SVOP    | SVOP    |
| hsa-miR-363*   | - | SYT15   | SYT15   |
| hsa-miR-363*   | - | TACR3   | TACR3   |
| hsa-miR-363*   | - | TBCC    | TBCC    |
| hsa-miR-363*   | - | TCP11L1 | TCP11L1 |
| hsa-miR-363*   | - | TDP1    | TDP1    |
| hsa-miR-363*   | - | TERF2   | TERF2   |
| hsa-miR-363*   | - | TERT    | TERT    |
| hsa-miR-363*   | - | TFF3    | TFF3    |
| hsa-miR-363*   | - | TIMP1   | TIMP1   |
| hsa-miR-363*   | - | TMEM138 | TMEM138 |
| hsa-miR-363*   | - | TNK2    | TNK2    |
| hsa-miR-363*   | - | TOR1A   | TOR1A   |
| hsa-miR-363*   | - | TPM2    | TPM2    |
| hsa-miR-363*   | - | TPM3    | TPM3    |
| hsa-miR-363*   | - | TPO     | TPO     |
| hsa-miR-363*   | - | TRIM5   | TRIM5   |
| hsa-miR-363*   | - | TRIM67  | TRIM67  |
| hsa-miR-363*   | - | TSPAN31 | TSPAN31 |
| hsa-miR-363*   | - | UAP1L1  | UAP1L1  |
| hsa-miR-363*   | - | UTP11L  | UTP11L  |
| hsa-miR-363*   | - | WDR54   | WDR54   |
| hsa-miR-363*   | - | WFDC8   | WFDC8   |
| hsa-miR-363*   | - | WFS1    | WFS1    |
| hsa-miR-363*   | - | WNT7A   | WNT7A   |
| hsa-miR-363*   | - | ZBTB3   | ZBTB3   |
| hsa-miR-363*   | - | ZC3H15  | ZC3H15  |
| hsa-miR-363*   | - | ZDHHC24 | ZDHHC24 |
| hsa-miR-363*   | - | ZMYND10 | ZMYND10 |
| hsa-miR-363*   | - | ZNF167  | ZNF167  |
| hsa-miR-363*   | - | ZNF234  | ZNF234  |
| hsa-miR-363*   | - | ZNF479  | ZNF479  |
| hsa-miR-363*   | - | ZNF592  | ZNF592  |
| hsa-miR-363*   | - | ZNF595  | ZNF595  |
| hsa-miR-363*   | - | ZNF614  | ZNF614  |
| hsa-miR-363*   | - | ZYG11A  | ZYG11A  |
| hsa-miR-369-3p | - | ABCA6   | ABCA6   |
| hsa-miR-369-3p | - | ABCB10  | ABCB10  |
| hsa-miR-369-3p | - | ABCD3   | ABCD3   |
| hsa-miR-369-3p | - | ABHD10  | ABHD10  |
| hsa-miR-369-3p | - | ABI3BP  | ABI3BP  |
| hsa-miR-369-3p | - | ABRA    | ABRA    |
| hsa-miR-369-3p | - | ACLY    | ACLY    |

|                |   |          |          |
|----------------|---|----------|----------|
| hsa-miR-369-3p | - | ACPP     | ACPP     |
| hsa-miR-369-3p | - | ACYP1    | ACYP1    |
| hsa-miR-369-3p | - | ADAMTS19 | ADAMTS19 |
| hsa-miR-369-3p | - | ADAMTS6  | ADAMTS6  |
| hsa-miR-369-3p | - | ADD3     | ADD3     |
| hsa-miR-369-3p | - | ADORA3   | ADORA3   |
| hsa-miR-369-3p | - | ADRA1A   | ADRA1A   |
| hsa-miR-369-3p | - | AGTPBP1  | AGTPBP1  |
| hsa-miR-369-3p | - | AIG1     | AIG1     |
| hsa-miR-369-3p | - | AK2      | AK2      |
| hsa-miR-369-3p | - | AK7      | AK7      |
| hsa-miR-369-3p | - | ANKRD28  | ANKRD28  |
| hsa-miR-369-3p | - | ANKRD42  | ANKRD42  |
| hsa-miR-369-3p | - | ANKRD44  | ANKRD44  |
| hsa-miR-369-3p | - | ANKRD7   | ANKRD7   |
| hsa-miR-369-3p | - | ANLN     | ANLN     |
| hsa-miR-369-3p | - | ANUBL1   | ANUBL1   |
| hsa-miR-369-3p | - | ANXA4    | ANXA4    |
| hsa-miR-369-3p | - | AP2A1    | AP2A1    |
| hsa-miR-369-3p | - | APCS     | APCS     |
| hsa-miR-369-3p | - | APOBEC1  | APOBEC1  |
| hsa-miR-369-3p | - | APOO     | APOO     |
| hsa-miR-369-3p | - | AQP11    | AQP11    |
| hsa-miR-369-3p | - | ARHGAP29 | ARHGAP29 |
| hsa-miR-369-3p | - | ARHGEF10 | ARHGEF10 |
| hsa-miR-369-3p | - | ARL6IP1  | ARL6IP1  |
| hsa-miR-369-3p | - | ARL6IP5  | ARL6IP5  |
| hsa-miR-369-3p | - | ARMC2    | ARMC2    |

|                |   |           |           |
|----------------|---|-----------|-----------|
| hsa-miR-369-3p | - | ASB12     | ASB12     |
| hsa-miR-369-3p | - | ASCC1     | ASCC1     |
| hsa-miR-369-3p | - | ATAD5     | ATAD5     |
| hsa-miR-369-3p | - | ATF2      | ATF2      |
| hsa-miR-369-3p | - | ATP5S     | ATP5S     |
| hsa-miR-369-3p | - | ATP6V0A4  | ATP6V0A4  |
| hsa-miR-369-3p | - | BAZ2B     | BAZ2B     |
| hsa-miR-369-3p | - | BCAR3     | BCAR3     |
| hsa-miR-369-3p | - | BCKDHB    | BCKDHB    |
| hsa-miR-369-3p | - | BIRC3     | BIRC3     |
| hsa-miR-369-3p | - | BOLL      | BOLL      |
| hsa-miR-369-3p | - | BRCA2     | BRCA2     |
| hsa-miR-369-3p | - | BRD7      | BRD7      |
| hsa-miR-369-3p | - | C10orf118 | C10orf118 |
| hsa-miR-369-3p | - | C10orf79  | C10orf79  |
| hsa-miR-369-3p | - | C11orf57  | C11orf57  |
| hsa-miR-369-3p | - | C11orf58  | C11orf58  |
| hsa-miR-369-3p | - | C11orf71  | C11orf71  |
| hsa-miR-369-3p | - | C12orf26  | C12orf26  |
| hsa-miR-369-3p | - | C13orf18  | C13orf18  |
| hsa-miR-369-3p | - | C14orf102 | C14orf102 |
| hsa-miR-369-3p | - | C17orf85  | C17orf85  |
| hsa-miR-369-3p | - | C1orf101  | C1orf101  |
| hsa-miR-369-3p | - | C1orf103  | C1orf103  |
| hsa-miR-369-3p | - | C1orf174  | C1orf174  |
| hsa-miR-369-3p | - | C1orf43   | C1orf43   |
| hsa-miR-369-3p | - | C2orf15   | C2orf15   |
| hsa-miR-369-3p | - | C3orf57   | C3orf57   |

|                |   |          |          |
|----------------|---|----------|----------|
| hsa-miR-369-3p | - | C4orf14  | C4orf14  |
| hsa-miR-369-3p | - | C4orf31  | C4orf31  |
| hsa-miR-369-3p | - | C5orf23  | C5orf23  |
| hsa-miR-369-3p | - | C5orf24  | C5orf24  |
| hsa-miR-369-3p | - | C6orf114 | C6orf114 |
| hsa-miR-369-3p | - | C6orf115 | C6orf115 |
| hsa-miR-369-3p | - | C6orf134 | C6orf134 |
| hsa-miR-369-3p | - | C6orf48  | C6orf48  |
| hsa-miR-369-3p | - | C6orf58  | C6orf58  |
| hsa-miR-369-3p | - | C7orf44  | C7orf44  |
| hsa-miR-369-3p | - | C8orf37  | C8orf37  |
| hsa-miR-369-3p | - | C8orf47  | C8orf47  |
| hsa-miR-369-3p | - | C8orf76  | C8orf76  |
| hsa-miR-369-3p | - | C9orf5   | C9orf5   |
| hsa-miR-369-3p | - | C9orf71  | C9orf71  |
| hsa-miR-369-3p | - | C9orf9   | C9orf9   |
| hsa-miR-369-3p | - | CA2      | CA2      |
| hsa-miR-369-3p | - | CAMLG    | CAMLG    |
| hsa-miR-369-3p | - | CAP2     | CAP2     |
| hsa-miR-369-3p | - | CARD11   | CARD11   |
| hsa-miR-369-3p | - | CASK     | CASK     |
| hsa-miR-369-3p | - | CASP6    | CASP6    |
| hsa-miR-369-3p | - | CBX1     | CBX1     |
| hsa-miR-369-3p | - | CCDC34   | CCDC34   |
| hsa-miR-369-3p | - | CCDC73   | CCDC73   |
| hsa-miR-369-3p | - | CCL4L1   | CCL4L1   |
| hsa-miR-369-3p | - | CCNG2    | CCNG2    |
| hsa-miR-369-3p | - | CCNL1    | CCNL1    |

|                |   |         |         |
|----------------|---|---------|---------|
| hsa-miR-369-3p | - | CCPG1   | CCPG1   |
| hsa-miR-369-3p | - | CD53    | CD53    |
| hsa-miR-369-3p | - | CDH2    | CDH2    |
| hsa-miR-369-3p | - | CENPK   | CENPK   |
| hsa-miR-369-3p | - | CFH     | CFH     |
| hsa-miR-369-3p | - | CHIC2   | CHIC2   |
| hsa-miR-369-3p | - | CHMP5   | CHMP5   |
| hsa-miR-369-3p | - | CHPT1   | CHPT1   |
| hsa-miR-369-3p | - | CLSPN   | CLSPN   |
| hsa-miR-369-3p | - | CLU     | CLU     |
| hsa-miR-369-3p | - | CNBP    | CNBP    |
| hsa-miR-369-3p | - | COL11A1 | COL11A1 |
| hsa-miR-369-3p | - | COL4A1  | COL4A1  |
| hsa-miR-369-3p | - | COLEC11 | COLEC11 |
| hsa-miR-369-3p | - | COMMD3  | COMMD3  |
| hsa-miR-369-3p | - | CPE     | CPE     |
| hsa-miR-369-3p | - | CPOX    | CPOX    |
| hsa-miR-369-3p | - | CPXCR1  | CPXCR1  |
| hsa-miR-369-3p | - | CRBN    | CRBN    |
| hsa-miR-369-3p | - | CRTAP   | CRTAP   |
| hsa-miR-369-3p | - | CSMD2   | CSMD2   |
| hsa-miR-369-3p | - | CSRP3   | CSRP3   |
| hsa-miR-369-3p | - | CSTA    | CSTA    |
| hsa-miR-369-3p | - | CYBB    | CYBB    |
| hsa-miR-369-3p | - | CYP2C9  | CYP2C9  |
| hsa-miR-369-3p | - | CYP2R1  | CYP2R1  |
| hsa-miR-369-3p | - | DCN     | DCN     |
| hsa-miR-369-3p | - | DCTN6   | DCTN6   |

|                |   |         |         |
|----------------|---|---------|---------|
| hsa-miR-369-3p | - | DENND1B | DENND1B |
| hsa-miR-369-3p | - | DHX29   | DHX29   |
| hsa-miR-369-3p | - | DLL1    | DLL1    |
| hsa-miR-369-3p | - | DMD     | DMD     |
| hsa-miR-369-3p | - | DMXL2   | DMXL2   |
| hsa-miR-369-3p | - | DNAJC12 | DNAJC12 |
| hsa-miR-369-3p | - | DNM1L   | DNM1L   |
| hsa-miR-369-3p | - | DPP4    | DPP4    |
| hsa-miR-369-3p | - | DTD1    | DTD1    |
| hsa-miR-369-3p | - | DTWD1   | DTWD1   |
| hsa-miR-369-3p | - | DUS4L   | DUS4L   |
| hsa-miR-369-3p | - | DUSP1   | DUSP1   |
| hsa-miR-369-3p | - | DZIP1   | DZIP1   |
| hsa-miR-369-3p | - | EAF2    | EAF2    |
| hsa-miR-369-3p | - | EID2B   | EID2B   |
| hsa-miR-369-3p | - | EIF4G3  | EIF4G3  |
| hsa-miR-369-3p | - | ELMOD1  | ELMOD1  |
| hsa-miR-369-3p | - | EMCN    | EMCN    |
| hsa-miR-369-3p | - | EME1    | EME1    |
| hsa-miR-369-3p | - | EML1    | EML1    |
| hsa-miR-369-3p | - | EPS8L2  | EPS8L2  |
| hsa-miR-369-3p | - | ESM1    | ESM1    |
| hsa-miR-369-3p | - | ETFA    | ETFA    |
| hsa-miR-369-3p | - | ETS2    | ETS2    |
| hsa-miR-369-3p | - | EXOC1   | EXOC1   |
| hsa-miR-369-3p | - | EXOSC3  | EXOSC3  |
| hsa-miR-369-3p | - | FAM107B | FAM107B |
| hsa-miR-369-3p | - | FAM120A | FAM120A |

|                |   |         |         |
|----------------|---|---------|---------|
| hsa-miR-369-3p | - | FBLN5   | FBLN5   |
| hsa-miR-369-3p | - | FBXL17  | FBXL17  |
| hsa-miR-369-3p | - | FCAMR   | FCAMR   |
| hsa-miR-369-3p | - | FEZF1   | FEZF1   |
| hsa-miR-369-3p | - | FKBP1A  | FKBP1A  |
| hsa-miR-369-3p | - | FLG     | FLG     |
| hsa-miR-369-3p | - | FMO3    | FMO3    |
| hsa-miR-369-3p | - | FMO4    | FMO4    |
| hsa-miR-369-3p | - | FRAS1   | FRAS1   |
| hsa-miR-369-3p | - | FREM1   | FREM1   |
| hsa-miR-369-3p | - | FRK     | FRK     |
| hsa-miR-369-3p | - | FYN     | FYN     |
| hsa-miR-369-3p | - | FZD6    | FZD6    |
| hsa-miR-369-3p | - | GADD45A | GADD45A |
| hsa-miR-369-3p | - | GAS6    | GAS6    |
| hsa-miR-369-3p | - | GATA6   | GATA6   |
| hsa-miR-369-3p | - | GDI2    | GDI2    |
| hsa-miR-369-3p | - | GFRA2   | GFRA2   |
| hsa-miR-369-3p | - | GIT2    | GIT2    |
| hsa-miR-369-3p | - | GLRA3   | GLRA3   |
| hsa-miR-369-3p | - | GLRX5   | GLRX5   |
| hsa-miR-369-3p | - | GLT6D1  | GLT6D1  |
| hsa-miR-369-3p | - | GNL3    | GNL3    |
| hsa-miR-369-3p | - | GPM6A   | GPM6A   |
| hsa-miR-369-3p | - | GPR125  | GPR125  |
| hsa-miR-369-3p | - | GPR126  | GPR126  |
| hsa-miR-369-3p | - | GPR84   | GPR84   |
| hsa-miR-369-3p | - | GPRIN3  | GPRIN3  |

|                |   |          |          |
|----------------|---|----------|----------|
| hsa-miR-369-3p | - | GPX7     | GPX7     |
| hsa-miR-369-3p | - | GRAMD1A  | GRAMD1A  |
| hsa-miR-369-3p | - | GTF2IRD2 | GTF2IRD2 |
| hsa-miR-369-3p | - | GUCY1A2  | GUCY1A2  |
| hsa-miR-369-3p | - | GULP1    | GULP1    |
| hsa-miR-369-3p | - | HAGH     | HAGH     |
| hsa-miR-369-3p | - | HES1     | HES1     |
| hsa-miR-369-3p | - | HEY2     | HEY2     |
| hsa-miR-369-3p | - | HIF3A    | HIF3A    |
| hsa-miR-369-3p | - | HMGCL    | HMGCL    |
| hsa-miR-369-3p | - | HMGCLL1  | HMGCLL1  |
| hsa-miR-369-3p | - | HOXC4    | HOXC4    |
| hsa-miR-369-3p | - | HS3ST1   | HS3ST1   |
| hsa-miR-369-3p | - | HSD17B6  | HSD17B6  |
| hsa-miR-369-3p | - | HSPA14   | HSPA14   |
| hsa-miR-369-3p | - | HSPH1    | HSPH1    |
| hsa-miR-369-3p | - | ID1      | ID1      |
| hsa-miR-369-3p | - | IDI1     | IDI1     |
| hsa-miR-369-3p | - | IFLTD1   | IFLTD1   |
| hsa-miR-369-3p | - | IFNG     | IFNG     |
| hsa-miR-369-3p | - | IL17F    | IL17F    |
| hsa-miR-369-3p | - | IL18RAP  | IL18RAP  |
| hsa-miR-369-3p | - | IL20RA   | IL20RA   |
| hsa-miR-369-3p | - | IL6      | IL6      |
| hsa-miR-369-3p | - | ILDR1    | ILDR1    |
| hsa-miR-369-3p | - | IMMP2L   | IMMP2L   |
| hsa-miR-369-3p | - | ING1     | ING1     |
| hsa-miR-369-3p | - | ING2     | ING2     |



|                |   |          |          |
|----------------|---|----------|----------|
| hsa-miR-369-3p | - | INTS8    | INTS8    |
| hsa-miR-369-3p | - | IRAK1BP1 | IRAK1BP1 |
| hsa-miR-369-3p | - | ISCA1    | ISCA1    |
| hsa-miR-369-3p | - | ITGB1    | ITGB1    |
| hsa-miR-369-3p | - | ITGB3    | ITGB3    |
| hsa-miR-369-3p | - | ITPR1    | ITPR1    |
| hsa-miR-369-3p | - | JMJD1C   | JMJD1C   |
| hsa-miR-369-3p | - | KCNA1    | KCNA1    |
| hsa-miR-369-3p | - | KCNJ3    | KCNJ3    |
| hsa-miR-369-3p | - | KCTD8    | KCTD8    |
| hsa-miR-369-3p | - | KHDRBS2  | KHDRBS2  |
| hsa-miR-369-3p | - | KIAA1012 | KIAA1012 |
| hsa-miR-369-3p | - | KIAA1704 | KIAA1704 |
| hsa-miR-369-3p | - | KIAA1826 | KIAA1826 |
| hsa-miR-369-3p | - | KIF20A   | KIF20A   |
| hsa-miR-369-3p | - | KLB      | KLB      |
| hsa-miR-369-3p | - | KLF10    | KLF10    |
| hsa-miR-369-3p | - | KLHL1    | KLHL1    |
| hsa-miR-369-3p | - | KLK7     | KLK7     |
| hsa-miR-369-3p | - | KRT4     | KRT4     |
| hsa-miR-369-3p | - | KRT85    | KRT85    |
| hsa-miR-369-3p | - | KTN1     | KTN1     |
| hsa-miR-369-3p | - | KYNU     | KYNU     |
| hsa-miR-369-3p | - | LDHA     | LDHA     |
| hsa-miR-369-3p | - | LIMK1    | LIMK1    |
| hsa-miR-369-3p | - | LNX1     | LNX1     |
| hsa-miR-369-3p | - | LOX      | LOX      |
| hsa-miR-369-3p | - | LPHN2    | LPHN2    |

|                |   |          |          |
|----------------|---|----------|----------|
| hsa-miR-369-3p | - | LRCH2    | LRCH2    |
| hsa-miR-369-3p | - | LRP1     | LRP1     |
| hsa-miR-369-3p | - | LRRC17   | LRRC17   |
| hsa-miR-369-3p | - | LRRC34   | LRRC34   |
| hsa-miR-369-3p | - | LRRC40   | LRRC40   |
| hsa-miR-369-3p | - | LTBP1    | LTBP1    |
| hsa-miR-369-3p | - | LTV1     | LTV1     |
| hsa-miR-369-3p | - | LYZ      | LYZ      |
| hsa-miR-369-3p | - | MASTL    | MASTL    |
| hsa-miR-369-3p | - | MBD5     | MBD5     |
| hsa-miR-369-3p | - | MCCC2    | MCCC2    |
| hsa-miR-369-3p | - | MCHR2    | MCHR2    |
| hsa-miR-369-3p | - | MCPH1    | MCPH1    |
| hsa-miR-369-3p | - | MEIS1    | MEIS1    |
| hsa-miR-369-3p | - | MET      | MET      |
| hsa-miR-369-3p | - | METT5D1  | METT5D1  |
| hsa-miR-369-3p | - | METTL3   | METTL3   |
| hsa-miR-369-3p | - | MFN1     | MFN1     |
| hsa-miR-369-3p | - | MGAT4A   | MGAT4A   |
| hsa-miR-369-3p | - | MITD1    | MITD1    |
| hsa-miR-369-3p | - | MKI67IP  | MKI67IP  |
| hsa-miR-369-3p | - | MMD      | MMD      |
| hsa-miR-369-3p | - | MMP10    | MMP10    |
| hsa-miR-369-3p | - | MMP7     | MMP7     |
| hsa-miR-369-3p | - | MORC4    | MORC4    |
| hsa-miR-369-3p | - | MPHOSPH6 | MPHOSPH6 |
| hsa-miR-369-3p | - | MRPL39   | MRPL39   |
| hsa-miR-369-3p | - | MRPS23   | MRPS23   |

|                |   |         |         |
|----------------|---|---------|---------|
| hsa-miR-369-3p | - | MTHFD2L | MTHFD2L |
| hsa-miR-369-3p | - | MTX3    | MTX3    |
| hsa-miR-369-3p | - | MUT     | MUT     |
| hsa-miR-369-3p | - | MYC     | MYC     |
| hsa-miR-369-3p | - | MYO16   | MYO16   |
| hsa-miR-369-3p | - | MYOZ2   | MYOZ2   |
| hsa-miR-369-3p | - | MYOZ3   | MYOZ3   |
| hsa-miR-369-3p | - | NBR1    | NBR1    |
| hsa-miR-369-3p | - | NCK1    | NCK1    |
| hsa-miR-369-3p | - | NCOA4   | NCOA4   |
| hsa-miR-369-3p | - | NDC80   | NDC80   |
| hsa-miR-369-3p | - | NDUFA1  | NDUFA1  |
| hsa-miR-369-3p | - | NDUFB5  | NDUFB5  |
| hsa-miR-369-3p | - | NEFM    | NEFM    |
| hsa-miR-369-3p | - | NETO1   | NETO1   |
| hsa-miR-369-3p | - | NEUROD1 | NEUROD1 |
| hsa-miR-369-3p | - | NEUROD6 | NEUROD6 |
| hsa-miR-369-3p | - | NEUROG2 | NEUROG2 |
| hsa-miR-369-3p | - | NEXN    | NEXN    |
| hsa-miR-369-3p | - | NFIL3   | NFIL3   |
| hsa-miR-369-3p | - | NIPBL   | NIPBL   |
| hsa-miR-369-3p | - | NKTR    | NKTR    |
| hsa-miR-369-3p | - | NOG     | NOG     |
| hsa-miR-369-3p | - | NOL11   | NOL11   |
| hsa-miR-369-3p | - | NPHP4   | NPHP4   |
| hsa-miR-369-3p | - | NSUN3   | NSUN3   |
| hsa-miR-369-3p | - | NXPH1   | NXPH1   |
| hsa-miR-369-3p | - | OCIAD1  | OCIAD1  |

|                |   |          |          |
|----------------|---|----------|----------|
| hsa-miR-369-3p | - | OPRM1    | OPRM1    |
| hsa-miR-369-3p | - | ORAOV1   | ORAOV1   |
| hsa-miR-369-3p | - | OTOR     | OTOR     |
| hsa-miR-369-3p | - | OTX1     | OTX1     |
| hsa-miR-369-3p | - | PAPPA2   | PAPPA2   |
| hsa-miR-369-3p | - | PASK     | PASK     |
| hsa-miR-369-3p | - | PAX4     | PAX4     |
| hsa-miR-369-3p | - | PAXIP1   | PAXIP1   |
| hsa-miR-369-3p | - | PCDH19   | PCDH19   |
| hsa-miR-369-3p | - | PCDHB15  | PCDHB15  |
| hsa-miR-369-3p | - | PCSK5    | PCSK5    |
| hsa-miR-369-3p | - | PDE3B    | PDE3B    |
| hsa-miR-369-3p | - | PDE8B    | PDE8B    |
| hsa-miR-369-3p | - | PDGFA    | PDGFA    |
| hsa-miR-369-3p | - | PDLIM3   | PDLIM3   |
| hsa-miR-369-3p | - | PDSS2    | PDSS2    |
| hsa-miR-369-3p | - | PDZRN3   | PDZRN3   |
| hsa-miR-369-3p | - | PEG3     | PEG3     |
| hsa-miR-369-3p | - | PF4V1    | PF4V1    |
| hsa-miR-369-3p | - | PFKP     | PFKP     |
| hsa-miR-369-3p | - | PHACTR3  | PHACTR3  |
| hsa-miR-369-3p | - | PHC3     | PHC3     |
| hsa-miR-369-3p | - | PHF12    | PHF12    |
| hsa-miR-369-3p | - | PIGP     | PIGP     |
| hsa-miR-369-3p | - | PLA2G12A | PLA2G12A |
| hsa-miR-369-3p | - | PLAU     | PLAU     |
| hsa-miR-369-3p | - | PLEKHA8  | PLEKHA8  |
| hsa-miR-369-3p | - | PMS1     | PMS1     |

|                |   |          |          |
|----------------|---|----------|----------|
| hsa-miR-369-3p | - | PNRC1    | PNRC1    |
| hsa-miR-369-3p | - | POLK     | POLK     |
| hsa-miR-369-3p | - | POP1     | POP1     |
| hsa-miR-369-3p | - | PPFIA2   | PPFIA2   |
| hsa-miR-369-3p | - | PPHLN1   | PPHLN1   |
| hsa-miR-369-3p | - | PPM1B    | PPM1B    |
| hsa-miR-369-3p | - | PPP3CC   | PPP3CC   |
| hsa-miR-369-3p | - | PRAMEF18 | PRAMEF18 |
| hsa-miR-369-3p | - | PRDM1    | PRDM1    |
| hsa-miR-369-3p | - | PRDX3    | PRDX3    |
| hsa-miR-369-3p | - | PROM2    | PROM2    |
| hsa-miR-369-3p | - | PRSS35   | PRSS35   |
| hsa-miR-369-3p | - | PSMA1    | PSMA1    |
| hsa-miR-369-3p | - | PTF1A    | PTF1A    |
| hsa-miR-369-3p | - | PTPLA    | PTPLA    |
| hsa-miR-369-3p | - | PTPN12   | PTPN12   |
| hsa-miR-369-3p | - | PTPN14   | PTPN14   |
| hsa-miR-369-3p | - | PTPN22   | PTPN22   |
| hsa-miR-369-3p | - | PTPRQ    | PTPRQ    |
| hsa-miR-369-3p | - | PTX3     | PTX3     |
| hsa-miR-369-3p | - | RAB20    | RAB20    |
| hsa-miR-369-3p | - | RAB28    | RAB28    |
| hsa-miR-369-3p | - | RABGAP1L | RABGAP1L |
| hsa-miR-369-3p | - | RAI1     | RAI1     |
| hsa-miR-369-3p | - | RALGPS2  | RALGPS2  |
| hsa-miR-369-3p | - | RANBP6   | RANBP6   |
| hsa-miR-369-3p | - | RANBP9   | RANBP9   |
| hsa-miR-369-3p | - | RASSF5   | RASSF5   |

|                |   |          |          |
|----------------|---|----------|----------|
| hsa-miR-369-3p | - | RBM26    | RBM26    |
| hsa-miR-369-3p | - | RBM41    | RBM41    |
| hsa-miR-369-3p | - | RFPL1    | RFPL1    |
| hsa-miR-369-3p | - | RFPL2    | RFPL2    |
| hsa-miR-369-3p | - | RGS13    | RGS13    |
| hsa-miR-369-3p | - | RGS4     | RGS4     |
| hsa-miR-369-3p | - | RGS7     | RGS7     |
| hsa-miR-369-3p | - | RNF103   | RNF103   |
| hsa-miR-369-3p | - | RNF130   | RNF130   |
| hsa-miR-369-3p | - | RNF170   | RNF170   |
| hsa-miR-369-3p | - | RNF6     | RNF6     |
| hsa-miR-369-3p | - | RPS17    | RPS17    |
| hsa-miR-369-3p | - | RRAGA    | RRAGA    |
| hsa-miR-369-3p | - | RRP15    | RRP15    |
| hsa-miR-369-3p | - | SCLT1    | SCLT1    |
| hsa-miR-369-3p | - | SCN8A    | SCN8A    |
| hsa-miR-369-3p | - | SCOC     | SCOC     |
| hsa-miR-369-3p | - | SENP5    | SENP5    |
| hsa-miR-369-3p | - | SETD2    | SETD2    |
| hsa-miR-369-3p | - | SETDB1   | SETDB1   |
| hsa-miR-369-3p | - | SFRS15   | SFRS15   |
| hsa-miR-369-3p | - | SFRS2IP  | SFRS2IP  |
| hsa-miR-369-3p | - | SFRS8    | SFRS8    |
| hsa-miR-369-3p | - | SGIP1    | SGIP1    |
| hsa-miR-369-3p | - | SH2D1A   | SH2D1A   |
| hsa-miR-369-3p | - | SH3BGRL  | SH3BGRL  |
| hsa-miR-369-3p | - | SKIV2L2  | SKIV2L2  |
| hsa-miR-369-3p | - | SLC25A16 | SLC25A16 |

|                |   |          |          |
|----------------|---|----------|----------|
| hsa-miR-369-3p | - | SLC25A36 | SLC25A36 |
| hsa-miR-369-3p | - | SLC25A5  | SLC25A5  |
| hsa-miR-369-3p | - | SLC30A5  | SLC30A5  |
| hsa-miR-369-3p | - | SLC33A1  | SLC33A1  |
| hsa-miR-369-3p | - | SLC35F1  | SLC35F1  |
| hsa-miR-369-3p | - | SLC35F5  | SLC35F5  |
| hsa-miR-369-3p | - | SLC44A5  | SLC44A5  |
| hsa-miR-369-3p | - | SLC9A10  | SLC9A10  |
| hsa-miR-369-3p | - | SMARCA1  | SMARCA1  |
| hsa-miR-369-3p | - | SMC2     | SMC2     |
| hsa-miR-369-3p | - | SMNDC1   | SMNDC1   |
| hsa-miR-369-3p | - | SMPDL3A  | SMPDL3A  |
| hsa-miR-369-3p | - | SMPDL3B  | SMPDL3B  |
| hsa-miR-369-3p | - | SNX14    | SNX14    |
| hsa-miR-369-3p | - | SOX15    | SOX15    |
| hsa-miR-369-3p | - | SOX2     | SOX2     |
| hsa-miR-369-3p | - | SOX30    | SOX30    |
| hsa-miR-369-3p | - | SPAG7    | SPAG7    |
| hsa-miR-369-3p | - | SPARCL1  | SPARCL1  |
| hsa-miR-369-3p | - | SPCS3    | SPCS3    |
| hsa-miR-369-3p | - | SPG20    | SPG20    |
| hsa-miR-369-3p | - | SRM      | SRM      |
| hsa-miR-369-3p | - | SRPK2    | SRPK2    |
| hsa-miR-369-3p | - | SSB      | SSB      |
| hsa-miR-369-3p | - | ST3GAL5  | ST3GAL5  |
| hsa-miR-369-3p | - | STARD3NL | STARD3NL |
| hsa-miR-369-3p | - | STK38L   | STK38L   |
| hsa-miR-369-3p | - | SULT4A1  | SULT4A1  |

|                |   |         |         |
|----------------|---|---------|---------|
| hsa-miR-369-3p | - | SUMF1   | SUMF1   |
| hsa-miR-369-3p | - | SYT4    | SYT4    |
| hsa-miR-369-3p | - | TAF9    | TAF9    |
| hsa-miR-369-3p | - | TAGAP   | TAGAP   |
| hsa-miR-369-3p | - | TAX1BP1 | TAX1BP1 |
| hsa-miR-369-3p | - | TBC1D9  | TBC1D9  |
| hsa-miR-369-3p | - | TCF4    | TCF4    |
| hsa-miR-369-3p | - | TCF7L2  | TCF7L2  |
| hsa-miR-369-3p | - | THAP5   | THAP5   |
| hsa-miR-369-3p | - | TIA1    | TIA1    |
| hsa-miR-369-3p | - | TIGD4   | TIGD4   |
| hsa-miR-369-3p | - | TJP1    | TJP1    |
| hsa-miR-369-3p | - | TLE4    | TLE4    |
| hsa-miR-369-3p | - | TLN1    | TLN1    |
| hsa-miR-369-3p | - | TLN2    | TLN2    |
| hsa-miR-369-3p | - | TLR4    | TLR4    |
| hsa-miR-369-3p | - | TLX3    | TLX3    |
| hsa-miR-369-3p | - | TMEM180 | TMEM180 |
| hsa-miR-369-3p | - | TMEM42  | TMEM42  |
| hsa-miR-369-3p | - | TMEM59  | TMEM59  |
| hsa-miR-369-3p | - | TMEM65  | TMEM65  |
| hsa-miR-369-3p | - | TMEM68  | TMEM68  |
| hsa-miR-369-3p | - | TMEM98  | TMEM98  |
| hsa-miR-369-3p | - | TMF1    | TMF1    |
| hsa-miR-369-3p | - | TNFAIP6 | TNFAIP6 |
| hsa-miR-369-3p | - | TOM1L1  | TOM1L1  |
| hsa-miR-369-3p | - | TRIP13  | TRIP13  |
| hsa-miR-369-3p | - | TRPC4   | TRPC4   |



|                |   |         |         |
|----------------|---|---------|---------|
| hsa-miR-369-3p | - | TSGA14  | TSGA14  |
| hsa-miR-369-3p | - | TTC32   | TTC32   |
| hsa-miR-369-3p | - | TUSC1   | TUSC1   |
| hsa-miR-369-3p | - | UBAP2   | UBAP2   |
| hsa-miR-369-3p | - | UBAP2L  | UBAP2L  |
| hsa-miR-369-3p | - | UBE2E2  | UBE2E2  |
| hsa-miR-369-3p | - | UBR2    | UBR2    |
| hsa-miR-369-3p | - | UCHL3   | UCHL3   |
| hsa-miR-369-3p | - | UCHL5   | UCHL5   |
| hsa-miR-369-3p | - | UGT8    | UGT8    |
| hsa-miR-369-3p | - | USP18   | USP18   |
| hsa-miR-369-3p | - | UVRAG   | UVRAG   |
| hsa-miR-369-3p | - | VEGFC   | VEGFC   |
| hsa-miR-369-3p | - | VNN2    | VNN2    |
| hsa-miR-369-3p | - | VPS13A  | VPS13A  |
| hsa-miR-369-3p | - | VSNL1   | VSNL1   |
| hsa-miR-369-3p | - | WDR20   | WDR20   |
| hsa-miR-369-3p | - | WDR3    | WDR3    |
| hsa-miR-369-3p | - | WDR44   | WDR44   |
| hsa-miR-369-3p | - | WDR67   | WDR67   |
| hsa-miR-369-3p | - | WDSUB1  | WDSUB1  |
| hsa-miR-369-3p | - | WSB1    | WSB1    |
| hsa-miR-369-3p | - | XCL2    | XCL2    |
| hsa-miR-369-3p | - | XKR9    | XKR9    |
| hsa-miR-369-3p | - | ZCCHC13 | ZCCHC13 |
| hsa-miR-369-3p | - | ZDHHC9  | ZDHHC9  |
| hsa-miR-369-3p | - | ZFAND6  | ZFAND6  |
| hsa-miR-369-3p | - | ZFPM2   | ZFPM2   |

|                |        |         |         |
|----------------|--------|---------|---------|
| hsa-miR-369-3p | -      | ZIC2    | ZIC2    |
| hsa-miR-369-3p | -      | ZNF23   | ZNF23   |
| hsa-miR-369-3p | -      | ZNF260  | ZNF260  |
| hsa-miR-369-3p | -      | ZNF281  | ZNF281  |
| hsa-miR-369-3p | -      | ZNF326  | ZNF326  |
| hsa-miR-369-3p | -      | ZNF330  | ZNF330  |
| hsa-miR-369-3p | -      | ZNF334  | ZNF334  |
| hsa-miR-369-3p | -      | ZNF350  | ZNF350  |
| hsa-miR-369-3p | -      | ZNF420  | ZNF420  |
| hsa-miR-369-3p | -      | ZNF423  | ZNF423  |
| hsa-miR-369-3p | -      | ZNF441  | ZNF441  |
| hsa-miR-369-3p | -      | ZNF521  | ZNF521  |
| hsa-miR-369-3p | -      | ZNF530  | ZNF530  |
| hsa-miR-369-3p | -      | ZNF568  | ZNF568  |
| hsa-miR-369-3p | -      | ZNF595  | ZNF595  |
| hsa-miR-369-3p | -      | ZNF771  | ZNF771  |
| hsa-miR-369-3p | -      | ZRANB3  | ZRANB3  |
| hsa-miR-370    | -      | ABCB11  | ABCB11  |
| hsa-miR-370    | ACBD7  | ACBD7   | -       |
| hsa-miR-370    | ACCN2  | ACCN2   | -       |
| hsa-miR-370    | -      | ACP5    | ACP5    |
| hsa-miR-370    | -      | ACSBG2  | ACSBG2  |
| hsa-miR-370    | ACTR1A | ACTR1A  | -       |
| hsa-miR-370    | ACVR2B | -       | ACVR2B  |
| hsa-miR-370    | -      | ADAM12  | ADAM12  |
| hsa-miR-370    | -      | ADAM8   | ADAM8   |
| hsa-miR-370    | -      | ADAMTS7 | ADAMTS7 |
| hsa-miR-370    | -      | ADCY6   | ADCY6   |
| hsa-miR-370    | -      | ADPRHL2 | ADPRHL2 |
| hsa-miR-370    | -      | ADRA1A  | ADRA1A  |
| hsa-miR-370    | AFF1   | AFF1    | -       |
| hsa-miR-370    | AGBL4  | AGBL4   | -       |
| hsa-miR-370    | -      | AJAP1   | AJAP1   |
| hsa-miR-370    | -      | AKT3    | AKT3    |
| hsa-miR-370    | -      | ANKS6   | ANKS6   |
| hsa-miR-370    | AP1G2  | -       | AP1G2   |
| hsa-miR-370    | APLN   | APLN    | -       |

|             |          |           |           |
|-------------|----------|-----------|-----------|
| hsa-miR-370 | ARCN1    | ARCN1     | -         |
| hsa-miR-370 | ARF3     | ARF3      | -         |
| hsa-miR-370 | -        | ARHGDI1   | ARHGDI1   |
| hsa-miR-370 | ARID4B   | ARID4B    | -         |
| hsa-miR-370 | -        | ARMC7     | ARMC7     |
| hsa-miR-370 | -        | ART5      | ART5      |
| hsa-miR-370 | ASB10    | -         | ASB10     |
| hsa-miR-370 | -        | ASB16     | ASB16     |
| hsa-miR-370 | -        | ASCC2     | ASCC2     |
| hsa-miR-370 | -        | ASPSCR1   | ASPSCR1   |
| hsa-miR-370 | -        | ATPAF2    | ATPAF2    |
| hsa-miR-370 | ATXN7L3  | ATXN7L3   | -         |
| hsa-miR-370 | -        | AURKA     | AURKA     |
| hsa-miR-370 | -        | B3GNTL1   | B3GNTL1   |
| hsa-miR-370 | BAALC    | BAALC     | -         |
| hsa-miR-370 | BAG4     | BAG4      | -         |
| hsa-miR-370 | BAP1     | BAP1      | -         |
| hsa-miR-370 | BAZ2A    | BAZ2A     | -         |
| hsa-miR-370 | BBS12    | BBS12     | -         |
| hsa-miR-370 | -        | BEST1     | BEST1     |
| hsa-miR-370 | -        | BEX2      | BEX2      |
| hsa-miR-370 | -        | BST1      | BST1      |
| hsa-miR-370 | -        | BTBD6     | BTBD6     |
| hsa-miR-370 | -        | C10orf116 | C10orf116 |
| hsa-miR-370 | -        | C12orf10  | C12orf10  |
| hsa-miR-370 | -        | C14orf115 | C14orf115 |
| hsa-miR-370 | C15orf17 | C15orf17  | -         |
| hsa-miR-370 | C15orf27 | C15orf27  | -         |
| hsa-miR-370 | -        | C17orf48  | C17orf48  |
| hsa-miR-370 | -        | C19orf30  | C19orf30  |
| hsa-miR-370 | -        | C1QTNF6   | C1QTNF6   |
| hsa-miR-370 | -        | C1orf43   | C1orf43   |
| hsa-miR-370 | -        | C2        | C2        |
| hsa-miR-370 | -        | C20orf186 | C20orf186 |
| hsa-miR-370 | C22orf13 | C22orf13  | -         |
| hsa-miR-370 | C2orf18  | C2orf18   | -         |
| hsa-miR-370 | -        | C3orf20   | C3orf20   |
| hsa-miR-370 | C3orf57  | C3orf57   | -         |
| hsa-miR-370 | C3orf62  | C3orf62   | -         |
| hsa-miR-370 | C6orf106 | C6orf106  | -         |
| hsa-miR-370 | C6orf132 | C6orf132  | -         |
| hsa-miR-370 | -        | C6orf134  | C6orf134  |
| hsa-miR-370 | -        | C6orf25   | C6orf25   |
| hsa-miR-370 | -        | C9orf86   | C9orf86   |
| hsa-miR-370 | -        | CACNA1F   | CACNA1F   |
| hsa-miR-370 | CASK     | -         | CASK      |
| hsa-miR-370 | -        | CASKIN1   | CASKIN1   |
| hsa-miR-370 | -        | CCDC107   | CCDC107   |
| hsa-miR-370 | CCDC136  | CCDC136   | -         |
| hsa-miR-370 | -        | CCDC46    | CCDC46    |
| hsa-miR-370 | -        | CCDC51    | CCDC51    |

|             |          |          |         |
|-------------|----------|----------|---------|
| hsa-miR-370 | CCDC64   | CCDC64   | -       |
| hsa-miR-370 | -        | CCDC76   | CCDC76  |
| hsa-miR-370 | CCNJ     | CCNJ     | -       |
| hsa-miR-370 | CCNK     | CCNK     | -       |
| hsa-miR-370 | -        | CD151    | CD151   |
| hsa-miR-370 | -        | CD300LF  | CD300LF |
| hsa-miR-370 | -        | CD300LG  | CD300LG |
| hsa-miR-370 | -        | CD72     | CD72    |
| hsa-miR-370 | CDC42EP4 | CDC42EP4 | -       |
| hsa-miR-370 | CDC42SE1 | CDC42SE1 | -       |
| hsa-miR-370 | -        | CDH16    | CDH16   |
| hsa-miR-370 | CDK12    | CDK12    | -       |
| hsa-miR-370 | -        | CDKL4    | CDKL4   |
| hsa-miR-370 | CDKN1A   | CDKN1A   | -       |
| hsa-miR-370 | -        | CEP164   | CEP164  |
| hsa-miR-370 | CFL1     | -        | CFL1    |
| hsa-miR-370 | CFLAR    | CFLAR    | -       |
| hsa-miR-370 | CHD2     | CHD2     | -       |
| hsa-miR-370 | CHRNA7   | CHRNA7   | -       |
| hsa-miR-370 | -        | CHST10   | CHST10  |
| hsa-miR-370 | CHST11   | CHST11   | -       |
| hsa-miR-370 | CHST15   | CHST15   | -       |
| hsa-miR-370 | -        | CHST7    | CHST7   |
| hsa-miR-370 | CHTF8    | CHTF8    | -       |
| hsa-miR-370 | -        | CKAP5    | CKAP5   |
| hsa-miR-370 | CLASP2   | CLASP2   | -       |
| hsa-miR-370 | -        | CLEC2A   | CLEC2A  |
| hsa-miR-370 | -        | CLEC4C   | CLEC4C  |
| hsa-miR-370 | CNTNAP1  | CNTNAP1  | -       |
| hsa-miR-370 | COG5     | COG5     | -       |
| hsa-miR-370 | -        | CORO1A   | CORO1A  |
| hsa-miR-370 | -        | CRCT1    | CRCT1   |
| hsa-miR-370 | -        | CREB3    | CREB3   |
| hsa-miR-370 | -        | CSAG1    | CSAG1   |
| hsa-miR-370 | -        | CST2     | CST2    |
| hsa-miR-370 | -        | CST5     | CST5    |
| hsa-miR-370 | CTSS     | CTSS     | -       |
| hsa-miR-370 | -        | CYP11A1  | CYP11A1 |
| hsa-miR-370 | CYP2U1   | CYP2U1   | -       |
| hsa-miR-370 | -        | DCBLD1   | DCBLD1  |
| hsa-miR-370 | DCLRE1B  | DCLRE1B  | -       |
| hsa-miR-370 | DDX3X    | DDX3X    | -       |
| hsa-miR-370 | DDX3Y    | DDX3Y    | -       |
| hsa-miR-370 | DGCR14   | DGCR14   | -       |
| hsa-miR-370 | -        | DHRS12   | DHRS12  |
| hsa-miR-370 | -        | DHX38    | DHX38   |
| hsa-miR-370 | DICER1   | DICER1   | -       |
| hsa-miR-370 | -        | DIS3L2   | DIS3L2  |
| hsa-miR-370 | -        | DISP2    | DISP2   |
| hsa-miR-370 | DNAH11   | DNAH11   | -       |
| hsa-miR-370 | DND1     | -        | DND1    |

|             |         |         |         |
|-------------|---------|---------|---------|
| hsa-miR-370 | DNMT3B  | DNMT3B  | -       |
| hsa-miR-370 | DSTYK   | DSTYK   | -       |
| hsa-miR-370 | -       | DTNB    | DTNB    |
| hsa-miR-370 | -       | DUSP13  | DUSP13  |
| hsa-miR-370 | DUSP3   | DUSP3   | -       |
| hsa-miR-370 | -       | EDA     | EDA     |
| hsa-miR-370 | -       | EDC4    | EDC4    |
| hsa-miR-370 | EEF2K   | EEF2K   | -       |
| hsa-miR-370 | EFNA1   | -       | EFNA1   |
| hsa-miR-370 | EFNB3   | EFNB3   | -       |
| hsa-miR-370 | EHD3    | EHD3    | -       |
| hsa-miR-370 | EML1    | EML1    | -       |
| hsa-miR-370 | EN2     | EN2     | -       |
| hsa-miR-370 | ENOX2   | ENOX2   | -       |
| hsa-miR-370 | EPHA5   | EPHA5   | -       |
| hsa-miR-370 | EPT1    | EPT1    | -       |
| hsa-miR-370 | ERF     | ERF     | -       |
| hsa-miR-370 | ESYT1   | ESYT1   | -       |
| hsa-miR-370 | FAM102A | FAM102A | -       |
| hsa-miR-370 | FAM164C | FAM164C | -       |
| hsa-miR-370 | FAM168B | FAM168B | -       |
| hsa-miR-370 | FAM76B  | FAM76B  | -       |
| hsa-miR-370 | -       | FANCA   | FANCA   |
| hsa-miR-370 | FBLN5   | FBLN5   | -       |
| hsa-miR-370 | FBXL2   | FBXL2   | -       |
| hsa-miR-370 | -       | FBXO36  | FBXO36  |
| hsa-miR-370 | FBXO46  | FBXO46  | -       |
| hsa-miR-370 | FCGR3A  | FCGR3A  | -       |
| hsa-miR-370 | -       | FDXR    | FDXR    |
| hsa-miR-370 | -       | FES     | FES     |
| hsa-miR-370 | -       | FFAR3   | FFAR3   |
| hsa-miR-370 | FGF11   | FGF11   | -       |
| hsa-miR-370 | -       | FGFR4   | FGFR4   |
| hsa-miR-370 | -       | FLNC    | FLNC    |
| hsa-miR-370 | FLT1    | FLT1    | -       |
| hsa-miR-370 | -       | FMNL1   | FMNL1   |
| hsa-miR-370 | FOXO1   | FOXO1   | -       |
| hsa-miR-370 | FRK     | FRK     | -       |
| hsa-miR-370 | -       | FTCD    | FTCD    |
| hsa-miR-370 | -       | FUS     | FUS     |
| hsa-miR-370 | -       | G6PC2   | G6PC2   |
| hsa-miR-370 | GABBR2  | GABBR2  | -       |
| hsa-miR-370 | GABRE   | GABRE   | -       |
| hsa-miR-370 | GADD45B | -       | GADD45B |
| hsa-miR-370 | -       | GALNT11 | GALNT11 |
| hsa-miR-370 | GAP43   | GAP43   | -       |
| hsa-miR-370 | -       | GHDC    | GHDC    |
| hsa-miR-370 | -       | GINS2   | GINS2   |
| hsa-miR-370 | -       | GIYD2   | GIYD2   |
| hsa-miR-370 | -       | GLYATL1 | GLYATL1 |
| hsa-miR-370 | GLYR1   | GLYR1   | -       |

|             |          |          |          |
|-------------|----------|----------|----------|
| hsa-miR-370 | GOSR1    | GOSR1    | -        |
| hsa-miR-370 | GSG1L    | -        | GSG1L    |
| hsa-miR-370 | -        | GSS      | GSS      |
| hsa-miR-370 | GYPC     | GYPC     | -        |
| hsa-miR-370 | -        | HAS3     | HAS3     |
| hsa-miR-370 | -        | HBXIP    | HBXIP    |
| hsa-miR-370 | HDAC4    | HDAC4    | -        |
| hsa-miR-370 | -        | HEPH     | HEPH     |
| hsa-miR-370 | -        | HGSNAT   | HGSNAT   |
| hsa-miR-370 | HHIPL1   | HHIPL1   | -        |
| hsa-miR-370 | -        | HIPK4    | HIPK4    |
| hsa-miR-370 | -        | HLCS     | HLCS     |
| hsa-miR-370 | HMGXB3   | HMGXB3   | -        |
| hsa-miR-370 | -        | HMHA1    | HMHA1    |
| hsa-miR-370 | HNRNPUL2 | HNRNPUL2 | -        |
| hsa-miR-370 | HPS5     | HPS5     | -        |
| hsa-miR-370 | -        | HR       | HR       |
| hsa-miR-370 | -        | HS1BP3   | HS1BP3   |
| hsa-miR-370 | HSPA12A  | HSPA12A  | -        |
| hsa-miR-370 | -        | HSPBAP1  | HSPBAP1  |
| hsa-miR-370 | HUWE1    | HUWE1    | -        |
| hsa-miR-370 | -        | ICA1     | ICA1     |
| hsa-miR-370 | -        | IFRD2    | IFRD2    |
| hsa-miR-370 | -        | IL12RB2  | IL12RB2  |
| hsa-miR-370 | -        | IL15RA   | IL15RA   |
| hsa-miR-370 | IL25     | IL25     | -        |
| hsa-miR-370 | ILDR2    | ILDR2    | -        |
| hsa-miR-370 | -        | ILK      | ILK      |
| hsa-miR-370 | INO80    | INO80    | -        |
| hsa-miR-370 | -        | ITFG3    | ITFG3    |
| hsa-miR-370 | -        | ITGB1BP2 | ITGB1BP2 |
| hsa-miR-370 | JMY      | JMY      | -        |
| hsa-miR-370 | KCNE1L   | KCNE1L   | -        |
| hsa-miR-370 | -        | KCNH4    | KCNH4    |
| hsa-miR-370 | -        | KCNK1    | KCNK1    |
| hsa-miR-370 | KCNK10   | KCNK10   | -        |
| hsa-miR-370 | KCNQ5    | KCNQ5    | -        |
| hsa-miR-370 | KIAA0355 | KIAA0355 | -        |
| hsa-miR-370 | KIAA2018 | KIAA2018 | -        |
| hsa-miR-370 | -        | KIF17    | KIF17    |
| hsa-miR-370 | KIFC2    | KIFC2    | -        |
| hsa-miR-370 | -        | KLF1     | KLF1     |
| hsa-miR-370 | KLF3     | KLF3     | -        |
| hsa-miR-370 | KLHL18   | KLHL18   | -        |
| hsa-miR-370 | LAYN     | LAYN     | -        |
| hsa-miR-370 | -        | LCN10    | LCN10    |
| hsa-miR-370 | LIN28A   | LIN28A   | -        |
| hsa-miR-370 | -        | LIPA     | LIPA     |
| hsa-miR-370 | -        | LMAN2    | LMAN2    |
| hsa-miR-370 | LPHN2    | LPHN2    | -        |
| hsa-miR-370 | -        | LRFN3    | LRFN3    |

|             |          |          |         |
|-------------|----------|----------|---------|
| hsa-miR-370 | -        | LRMP     | LRMP    |
| hsa-miR-370 | -        | LRP1     | LRP1    |
| hsa-miR-370 | -        | LZTS2    | LZTS2   |
| hsa-miR-370 | -        | MAF1     | MAF1    |
| hsa-miR-370 | MAML1    | MAML1    | -       |
| hsa-miR-370 | MAP2K7   | MAP2K7   | -       |
| hsa-miR-370 | -        | MAP3K8   | MAP3K8  |
| hsa-miR-370 | MARCKS   | MARCKS   | -       |
| hsa-miR-370 | MGLL     | MGLL     | -       |
| hsa-miR-370 | MLEC     | MLEC     | -       |
| hsa-miR-370 | -        | MLXIPL   | MLXIPL  |
| hsa-miR-370 | MOCS1    | MOCS1    | -       |
| hsa-miR-370 | MRO      | MRO      | -       |
| hsa-miR-370 | -        | MRPL45   | MRPL45  |
| hsa-miR-370 | MRPS25   | MRPS25   | -       |
| hsa-miR-370 | MTSS1    | MTSS1    | -       |
| hsa-miR-370 | -        | MYST3    | MYST3   |
| hsa-miR-370 | NAA15    | NAA15    | -       |
| hsa-miR-370 | NAA40    | NAA40    | -       |
| hsa-miR-370 | NAPG     | NAPG     | -       |
| hsa-miR-370 | NCOA5    | NCOA5    | -       |
| hsa-miR-370 | NEK9     | NEK9     | -       |
| hsa-miR-370 | NF1      | NF1      | -       |
| hsa-miR-370 | -        | NFATC3   | NFATC3  |
| hsa-miR-370 | -        | NFKBIL1  | NFKBIL1 |
| hsa-miR-370 | NKAIN1   | NKAIN1   | -       |
| hsa-miR-370 | NKAPL    | NKAPL    | -       |
| hsa-miR-370 | NLGN2    | NLGN2    | -       |
| hsa-miR-370 | NOTCH2NL | NOTCH2NL | -       |
| hsa-miR-370 | -        | NPSR1    | NPSR1   |
| hsa-miR-370 | NSUN4    | NSUN4    | -       |
| hsa-miR-370 | -        | NUDT2    | NUDT2   |
| hsa-miR-370 | -        | NUMA1    | NUMA1   |
| hsa-miR-370 | -        | NUP210   | NUP210  |
| hsa-miR-370 | -        | NUP214   | NUP214  |
| hsa-miR-370 | -        | OASL     | OASL    |
| hsa-miR-370 | ODF2     | ODF2     | -       |
| hsa-miR-370 | -        | ONECUT1  | ONECUT1 |
| hsa-miR-370 | OPA3     | -        | OPA3    |
| hsa-miR-370 | PACS1    | -        | PACS1   |
| hsa-miR-370 | -        | PARVB    | PARVB   |
| hsa-miR-370 | PCDH10   | PCDH10   | -       |
| hsa-miR-370 | PCDH11X  | PCDH11X  | -       |
| hsa-miR-370 | PCDH11Y  | PCDH11Y  | -       |
| hsa-miR-370 | PCDH19   | -        | PCDH19  |
| hsa-miR-370 | -        | PCYT2    | PCYT2   |
| hsa-miR-370 | -        | PDE1C    | PDE1C   |
| hsa-miR-370 | PDE7A    | PDE7A    | -       |
| hsa-miR-370 | -        | PDHB     | PDHB    |
| hsa-miR-370 | PEAR1    | PEAR1    | -       |
| hsa-miR-370 | PHF14    | PHF14    | -       |

|             |          |          |          |
|-------------|----------|----------|----------|
| hsa-miR-370 | -        | PIGQ     | PIGQ     |
| hsa-miR-370 | -        | PIK3CA   | PIK3CA   |
| hsa-miR-370 | PKHD1    | PKHD1    | -        |
| hsa-miR-370 | -        | PKLR     | PKLR     |
| hsa-miR-370 | -        | PLB1     | PLB1     |
| hsa-miR-370 | PLCXD3   | PLCXD3   | -        |
| hsa-miR-370 | PLEKHA6  | -        | PLEKHA6  |
| hsa-miR-370 | -        | POP1     | POP1     |
| hsa-miR-370 | PPP2R5D  | PPP2R5D  | -        |
| hsa-miR-370 | PRDM10   | PRDM10   | -        |
| hsa-miR-370 | -        | PROSC    | PROSC    |
| hsa-miR-370 | -        | PRPF19   | PRPF19   |
| hsa-miR-370 | -        | PRR13    | PRR13    |
| hsa-miR-370 | -        | PRTFDC1  | PRTFDC1  |
| hsa-miR-370 | -        | PSMD2    | PSMD2    |
| hsa-miR-370 | -        | PSMD3    | PSMD3    |
| hsa-miR-370 | PTRF     | PTRF     | -        |
| hsa-miR-370 | QKI      | QKI      | -        |
| hsa-miR-370 | RAB11A   | RAB11A   | -        |
| hsa-miR-370 | -        | RAD54L2  | RAD54L2  |
| hsa-miR-370 | -        | RALGPS1  | RALGPS1  |
| hsa-miR-370 | RAP1GDS1 | RAP1GDS1 | -        |
| hsa-miR-370 | RAPGEF1  | RAPGEF1  | -        |
| hsa-miR-370 | RAPGEFL1 | RAPGEFL1 | -        |
| hsa-miR-370 | -        | RARRES1  | RARRES1  |
| hsa-miR-370 | -        | RASGEF1C | RASGEF1C |
| hsa-miR-370 | RASGRP4  | -        | RASGRP4  |
| hsa-miR-370 | RBBP4    | -        | RBBP4    |
| hsa-miR-370 | -        | RBM4     | RBM4     |
| hsa-miR-370 | -        | RBP1     | RBP1     |
| hsa-miR-370 | RFX7     | RFX7     | -        |
| hsa-miR-370 | RGS3     | RGS3     | -        |
| hsa-miR-370 | -        | RIMS2    | RIMS2    |
| hsa-miR-370 | -        | RNF170   | RNF170   |
| hsa-miR-370 | -        | RPS6KB2  | RPS6KB2  |
| hsa-miR-370 | RSPO1    | RSPO1    | -        |
| hsa-miR-370 | RUNX1    | RUNX1    | -        |
| hsa-miR-370 | RUNX1T1  | RUNX1T1  | -        |
| hsa-miR-370 | -        | SARS     | SARS     |
| hsa-miR-370 | SCN5A    | SCN5A    | -        |
| hsa-miR-370 | SCUBE3   | SCUBE3   | -        |
| hsa-miR-370 | SEMA6A   | -        | SEMA6A   |
| hsa-miR-370 | -        | SERPINA4 | SERPINA4 |
| hsa-miR-370 | SERTAD4  | SERTAD4  | -        |
| hsa-miR-370 | SH3BP2   | -        | SH3BP2   |
| hsa-miR-370 | -        | SIPA1L2  | SIPA1L2  |
| hsa-miR-370 | SIX1     | SIX1     | -        |
| hsa-miR-370 | SLAMF6   | SLAMF6   | -        |
| hsa-miR-370 | SLC16A12 | SLC16A12 | -        |
| hsa-miR-370 | -        | SLC23A2  | SLC23A2  |
| hsa-miR-370 | SLC48A1  | SLC48A1  | -        |



|             |         |         |         |
|-------------|---------|---------|---------|
| hsa-miR-370 | SLC4A4  | SLC4A4  | -       |
| hsa-miR-370 | -       | SLPI    | SLPI    |
| hsa-miR-370 | SMARCD1 | SMARCD1 | -       |
| hsa-miR-370 | SMO     | SMO     | -       |
| hsa-miR-370 | SMURF1  | SMURF1  | -       |
| hsa-miR-370 | -       | SNAPC4  | SNAPC4  |
| hsa-miR-370 | -       | SNX5    | SNX5    |
| hsa-miR-370 | SOX12   | SOX12   | -       |
| hsa-miR-370 | -       | SPACA3  | SPACA3  |
| hsa-miR-370 | -       | SPATA19 | SPATA19 |
| hsa-miR-370 | SPPL3   | SPPL3   | -       |
| hsa-miR-370 | SSH2    | SSH2    | -       |
| hsa-miR-370 | -       | ST3GAL4 | ST3GAL4 |
| hsa-miR-370 | ST6GAL1 | ST6GAL1 | -       |
| hsa-miR-370 | STK16   | STK16   | -       |
| hsa-miR-370 | STK35   | STK35   | -       |
| hsa-miR-370 | -       | STK36   | STK36   |
| hsa-miR-370 | -       | STMN4   | STMN4   |
| hsa-miR-370 | -       | STX7    | STX7    |
| hsa-miR-370 | -       | SYTL3   | SYTL3   |
| hsa-miR-370 | TADA1   | TADA1   | -       |
| hsa-miR-370 | -       | TAF9    | TAF9    |
| hsa-miR-370 | -       | TAOK1   | TAOK1   |
| hsa-miR-370 | TAP2    | TAP2    | -       |
| hsa-miR-370 | -       | TAS1R1  | TAS1R1  |
| hsa-miR-370 | TGFBR2  | TGFBR2  | -       |
| hsa-miR-370 | -       | THRA    | THRA    |
| hsa-miR-370 | -       | TLE3    | TLE3    |
| hsa-miR-370 | -       | TMC5    | TMC5    |
| hsa-miR-370 | TMC8    | TMC8    | -       |
| hsa-miR-370 | -       | TMEM108 | TMEM108 |
| hsa-miR-370 | TMEM154 | TMEM154 | -       |
| hsa-miR-370 | TMEM40  | TMEM40  | -       |
| hsa-miR-370 | TMEM86A | TMEM86A | -       |
| hsa-miR-370 | TNRC6C  | TNRC6C  | -       |
| hsa-miR-370 | TOM1L2  | TOM1L2  | -       |
| hsa-miR-370 | -       | TP53BP2 | TP53BP2 |
| hsa-miR-370 | -       | TPO     | TPO     |
| hsa-miR-370 | TRAF4   | TRAF4   | -       |
| hsa-miR-370 | -       | TRAPPC3 | TRAPPC3 |
| hsa-miR-370 | -       | TREML4  | TREML4  |
| hsa-miR-370 | -       | TRIM26  | TRIM26  |
| hsa-miR-370 | TRIM33  | TRIM33  | -       |
| hsa-miR-370 | TRIT1   | TRIT1   | -       |
| hsa-miR-370 | -       | TSPO    | TSPO    |
| hsa-miR-370 | -       | TUBGCP2 | TUBGCP2 |
| hsa-miR-370 | -       | TWIST1  | TWIST1  |
| hsa-miR-370 | TXNDC12 | TXNDC12 | -       |
| hsa-miR-370 | UBE2L3  | UBE2L3  | -       |
| hsa-miR-370 | UBE2R2  | UBE2R2  | -       |
| hsa-miR-370 | -       | UBTD1   | UBTD1   |

|              |         |         |        |
|--------------|---------|---------|--------|
| hsa-miR-370  | UBTF    | UBTF    | -      |
| hsa-miR-370  | UBXN7   | UBXN7   | -      |
| hsa-miR-370  | -       | UFD1L   | UFD1L  |
| hsa-miR-370  | ULK2    | -       | ULK2   |
| hsa-miR-370  | UNC5C   | UNC5C   | -      |
| hsa-miR-370  | -       | UPF2    | UPF2   |
| hsa-miR-370  | USP37   | USP37   | -      |
| hsa-miR-370  | -       | USP39   | USP39  |
| hsa-miR-370  | USP5    | -       | USP5   |
| hsa-miR-370  | VANGL1  | -       | VANGL1 |
| hsa-miR-370  | -       | VEGFB   | VEGFB  |
| hsa-miR-370  | WDR82   | WDR82   | -      |
| hsa-miR-370  | -       | WDR88   | WDR88  |
| hsa-miR-370  | WDTC1   | WDTC1   | -      |
| hsa-miR-370  | -       | WISP2   | WISP2  |
| hsa-miR-370  | -       | YEATS2  | YEATS2 |
| hsa-miR-370  | ZBTB39  | -       | ZBTB39 |
| hsa-miR-370  | ZCCHC17 | ZCCHC17 | -      |
| hsa-miR-370  | ZDHHC23 | ZDHHC23 | -      |
| hsa-miR-370  | ZDHHC5  | ZDHHC5  | -      |
| hsa-miR-370  | ZMYND11 | ZMYND11 | -      |
| hsa-miR-370  | ZNF185  | ZNF185  | -      |
| hsa-miR-370  | ZNF37A  | ZNF37A  | -      |
| hsa-miR-370  | ZNF398  | ZNF398  | -      |
| hsa-miR-370  | ZNF605  | ZNF605  | -      |
| hsa-miR-370  | ZNF740  | ZNF740  | -      |
| hsa-miR-370  | -       | ZSCAN2  | ZSCAN2 |
| hsa-miR-376c | ABCA1   | ABCA1   | -      |
| hsa-miR-376c | ABCA5   | ABCA5   | -      |
| hsa-miR-376c | -       | ABCA6   | ABCA6  |
| hsa-miR-376c | ABCC4   | ABCC4   | -      |
| hsa-miR-376c | ABCC9   | ABCC9   | -      |
| hsa-miR-376c | ABLIM3  | ABLIM3  | -      |
| hsa-miR-376c | -       | ACAT1   | ACAT1  |
| hsa-miR-376c | ACIN1   | ACIN1   | -      |
| hsa-miR-376c | ACSL1   | ACSL1   | -      |
| hsa-miR-376c | -       | ACTR10  | ACTR10 |
| hsa-miR-376c | ADCY9   | ADCY9   | -      |
| hsa-miR-376c | ADCYAP1 | ADCYAP1 | -      |
| hsa-miR-376c | -       | ADH4    | ADH4   |
| hsa-miR-376c | ADIPOQ  | ADIPOQ  | -      |
| hsa-miR-376c | ADRBK2  | ADRBK2  | -      |
| hsa-miR-376c | AEBP2   | AEBP2   | -      |
| hsa-miR-376c | -       | AFAP1   | AFAP1  |
| hsa-miR-376c | AFAP1L2 | AFAP1L2 | -      |
| hsa-miR-376c | -       | AGBL5   | AGBL5  |
| hsa-miR-376c | AGFG1   | AGFG1   | -      |
| hsa-miR-376c | AHI1    | -       | AHI1   |
| hsa-miR-376c | AICDA   | AICDA   | -      |
| hsa-miR-376c | -       | AIFM1   | AIFM1  |
| hsa-miR-376c | -       | AIRE    | AIRE   |

|              |           |           |         |
|--------------|-----------|-----------|---------|
| hsa-miR-376c | AKAP13    | AKAP13    | -       |
| hsa-miR-376c | AKR1D1    | AKR1D1    | -       |
| hsa-miR-376c | ALCAM     | ALCAM     | -       |
| hsa-miR-376c | ALG10B    | -         | ALG10B  |
| hsa-miR-376c | -         | ALK       | ALK     |
| hsa-miR-376c | -         | AMTN      | AMTN    |
| hsa-miR-376c | ANK2      | ANK2      | -       |
| hsa-miR-376c | ANKFY1    | ANKFY1    | -       |
| hsa-miR-376c | ANKRD50   | ANKRD50   | -       |
| hsa-miR-376c | -         | ANUBL1    | ANUBL1  |
| hsa-miR-376c | -         | ANXA1     | ANXA1   |
| hsa-miR-376c | -         | AP3D1     | AP3D1   |
| hsa-miR-376c | -         | AP3S1     | AP3S1   |
| hsa-miR-376c | -         | APIP      | APIP    |
| hsa-miR-376c | APPL1     | APPL1     | -       |
| hsa-miR-376c | ARFGEF2   | ARFGEF2   | -       |
| hsa-miR-376c | ARHGAP11A | ARHGAP11A | -       |
| hsa-miR-376c | ARHGAP28  | ARHGAP28  | -       |
| hsa-miR-376c | ARHGAP31  | ARHGAP31  | -       |
| hsa-miR-376c | ARHGAP6   | ARHGAP6   | -       |
| hsa-miR-376c | ARHGEF12  | ARHGEF12  | -       |
| hsa-miR-376c | -         | ARHGEF9   | ARHGEF9 |
| hsa-miR-376c | ARID2     | ARID2     | -       |
| hsa-miR-376c | ARL8B     | ARL8B     | -       |
| hsa-miR-376c | ARMCX3    | ARMCX3    | -       |
| hsa-miR-376c | ARNT      | ARNT      | -       |
| hsa-miR-376c | ASB15     | ASB15     | -       |
| hsa-miR-376c | ASCC3     | -         | ASCC3   |
| hsa-miR-376c | ASPH      | ASPH      | -       |
| hsa-miR-376c | ASTN1     | -         | ASTN1   |
| hsa-miR-376c | ATAD1     | ATAD1     | -       |
| hsa-miR-376c | ATAD2B    | ATAD2B    | -       |
| hsa-miR-376c | ATF6      | ATF6      | -       |
| hsa-miR-376c | -         | ATG12     | ATG12   |
| hsa-miR-376c | ATG5      | ATG5      | -       |
| hsa-miR-376c | -         | ATP13A3   | ATP13A3 |
| hsa-miR-376c | ATP1B3    | ATP1B3    | -       |
| hsa-miR-376c | ATP2B4    | ATP2B4    | -       |
| hsa-miR-376c | ATP2C1    | ATP2C1    | -       |
| hsa-miR-376c | -         | ATP4B     | ATP4B   |
| hsa-miR-376c | ATP5G3    | -         | ATP5G3  |
| hsa-miR-376c | ATP6V0A2  | ATP6V0A2  | -       |
| hsa-miR-376c | ATP6V1C1  | ATP6V1C1  | -       |
| hsa-miR-376c | ATP7A     | ATP7A     | -       |
| hsa-miR-376c | -         | B3GALTL   | B3GALTL |
| hsa-miR-376c | B3GNT9    | B3GNT9    | -       |
| hsa-miR-376c | B4GALT1   | B4GALT1   | -       |
| hsa-miR-376c | BACH2     | BACH2     | -       |
| hsa-miR-376c | BAG5      | BAG5      | -       |
| hsa-miR-376c | BAHCC1    | BAHCC1    | -       |
| hsa-miR-376c | BAZ1A     | BAZ1A     | -       |

|              |          |          |          |
|--------------|----------|----------|----------|
| hsa-miR-376c | BCAP29   | BCAP29   | -        |
| hsa-miR-376c | BCL2L15  | BCL2L15  | -        |
| hsa-miR-376c | BCOR     | BCOR     | -        |
| hsa-miR-376c | BDP1     | BDP1     | -        |
| hsa-miR-376c | BHLHE41  | BHLHE41  | -        |
| hsa-miR-376c | BMI1     | BMI1     | -        |
| hsa-miR-376c | BMP3     | BMP3     | -        |
| hsa-miR-376c | BOD1L    | BOD1L    | -        |
| hsa-miR-376c | -        | BTG3     | BTG3     |
| hsa-miR-376c | -        | BUB3     | BUB3     |
| hsa-miR-376c | -        | C10orf28 | C10orf28 |
| hsa-miR-376c | C11orf57 | C11orf57 | -        |
| hsa-miR-376c | C11orf58 | C11orf58 | -        |
| hsa-miR-376c | -        | C11orf61 | C11orf61 |
| hsa-miR-376c | C14orf43 | C14orf43 | -        |
| hsa-miR-376c | -        | C15orf26 | C15orf26 |
| hsa-miR-376c | C15orf29 | C15orf29 | -        |
| hsa-miR-376c | -        | C16orf80 | C16orf80 |
| hsa-miR-376c | C18orf1  | C18orf1  | -        |
| hsa-miR-376c | -        | C1S      | C1S      |
| hsa-miR-376c | -        | C1orf101 | C1orf101 |
| hsa-miR-376c | -        | C1orf105 | C1orf105 |
| hsa-miR-376c | -        | C1orf128 | C1orf128 |
| hsa-miR-376c | C1orf130 | C1orf130 | -        |
| hsa-miR-376c | -        | C1orf135 | C1orf135 |
| hsa-miR-376c | -        | C1orf172 | C1orf172 |
| hsa-miR-376c | C1orf55  | C1orf55  | -        |
| hsa-miR-376c | -        | C1orf59  | C1orf59  |
| hsa-miR-376c | -        | C1orf74  | C1orf74  |
| hsa-miR-376c | C21orf91 | C21orf91 | -        |
| hsa-miR-376c | C2orf3   | C2orf3   | -        |
| hsa-miR-376c | C2orf67  | C2orf67  | -        |
| hsa-miR-376c | C3orf23  | C3orf23  | -        |
| hsa-miR-376c | C3orf70  | C3orf70  | -        |
| hsa-miR-376c | C5orf54  | C5orf54  | -        |
| hsa-miR-376c | -        | C6orf115 | C6orf115 |
| hsa-miR-376c | -        | C6orf154 | C6orf154 |
| hsa-miR-376c | C8orf34  | C8orf34  | -        |
| hsa-miR-376c | C8orf46  | C8orf46  | -        |
| hsa-miR-376c | -        | C9orf71  | C9orf71  |
| hsa-miR-376c | CA2      | CA2      | -        |
| hsa-miR-376c | CA8      | CA8      | -        |
| hsa-miR-376c | CAB39    | CAB39    | -        |
| hsa-miR-376c | CABLES1  | -        | CABLES1  |
| hsa-miR-376c | CACNA1E  | CACNA1E  | -        |
| hsa-miR-376c | -        | CACNA2D1 | CACNA2D1 |
| hsa-miR-376c | CACNB2   | CACNB2   | -        |
| hsa-miR-376c | CACNB4   | CACNB4   | -        |
| hsa-miR-376c | CADM2    | CADM2    | -        |
| hsa-miR-376c | -        | CALB2    | CALB2    |
| hsa-miR-376c | -        | CALCB    | CALCB    |

|              |          |          |          |
|--------------|----------|----------|----------|
| hsa-miR-376c | CALCOCO1 | CALCOCO1 | -        |
| hsa-miR-376c | CALCRL   | CALCRL   | -        |
| hsa-miR-376c | CALML4   | CALML4   | -        |
| hsa-miR-376c | CAP2     | CAP2     | -        |
| hsa-miR-376c | CARD8    | CARD8    | -        |
| hsa-miR-376c | CASZ1    | CASZ1    | -        |
| hsa-miR-376c | CBLN1    | CBLN1    | -        |
| hsa-miR-376c | -        | CBX1     | CBX1     |
| hsa-miR-376c | CBX4     | CBX4     | -        |
| hsa-miR-376c | CC2D1B   | CC2D1B   | -        |
| hsa-miR-376c | CCDC50   | CCDC50   | -        |
| hsa-miR-376c | -        | CCDC53   | CCDC53   |
| hsa-miR-376c | -        | CCDC62   | CCDC62   |
| hsa-miR-376c | CCDC85C  | CCDC85C  | -        |
| hsa-miR-376c | -        | CCNB3    | CCNB3    |
| hsa-miR-376c | CCPG1    | CCPG1    | -        |
| hsa-miR-376c | CCR2     | CCR2     | -        |
| hsa-miR-376c | CDH11    | CDH11    | -        |
| hsa-miR-376c | CDH13    | CDH13    | -        |
| hsa-miR-376c | -        | CDH9     | CDH9     |
| hsa-miR-376c | CDK12    | CDK12    | -        |
| hsa-miR-376c | -        | CDK5RAP1 | CDK5RAP1 |
| hsa-miR-376c | -        | CDS1     | CDS1     |
| hsa-miR-376c | -        | CEBPB    | CEBPB    |
| hsa-miR-376c | CEP170   | CEP170   | -        |
| hsa-miR-376c | CEP55    | CEP55    | -        |
| hsa-miR-376c | -        | CFC1     | CFC1     |
| hsa-miR-376c | -        | CFDP1    | CFDP1    |
| hsa-miR-376c | CGGBP1   | CGGBP1   | -        |
| hsa-miR-376c | -        | CH25H    | CH25H    |
| hsa-miR-376c | CHD2     | CHD2     | -        |
| hsa-miR-376c | CHD9     | CHD9     | -        |
| hsa-miR-376c | CHM      | CHM      | -        |
| hsa-miR-376c | -        | CHORDC1  | CHORDC1  |
| hsa-miR-376c | -        | CHRNA1   | CHRNA1   |
| hsa-miR-376c | CIAPIN1  | CIAPIN1  | -        |
| hsa-miR-376c | CISD3    | CISD3    | -        |
| hsa-miR-376c | CLDN22   | CLDN22   | -        |
| hsa-miR-376c | CLEC4E   | CLEC4E   | -        |
| hsa-miR-376c | -        | CLEC9A   | CLEC9A   |
| hsa-miR-376c | CLIC2    | CLIC2    | -        |
| hsa-miR-376c | -        | CLOCK    | CLOCK    |
| hsa-miR-376c | -        | CMTM1    | CMTM1    |
| hsa-miR-376c | CMTM4    | CMTM4    | -        |
| hsa-miR-376c | CNTN4    | CNTN4    | -        |
| hsa-miR-376c | COG5     | COG5     | -        |
| hsa-miR-376c | COL19A1  | COL19A1  | -        |
| hsa-miR-376c | COL6A1   | COL6A1   | -        |
| hsa-miR-376c | -        | COMMD8   | COMMD8   |
| hsa-miR-376c | COPS8    | COPS8    | -        |
| hsa-miR-376c | CPD      | CPD      | -        |

|              |          |          |         |
|--------------|----------|----------|---------|
| hsa-miR-376c | CPEB3    | CPEB3    | -       |
| hsa-miR-376c | CPEB4    | CPEB4    | -       |
| hsa-miR-376c | CPSF6    | -        | CPSF6   |
| hsa-miR-376c | CREG2    | CREG2    | -       |
| hsa-miR-376c | -        | CREM     | CREM    |
| hsa-miR-376c | CRIPT    | CRIPT    | -       |
| hsa-miR-376c | CRISPLD1 | CRISPLD1 | -       |
| hsa-miR-376c | -        | CROT     | CROT    |
| hsa-miR-376c | CRYZ     | CRYZ     | -       |
| hsa-miR-376c | -        | CSF2RA   | CSF2RA  |
| hsa-miR-376c | CSNK1G1  | CSNK1G1  | -       |
| hsa-miR-376c | CTAGE1   | CTAGE1   | -       |
| hsa-miR-376c | -        | CTH      | CTH     |
| hsa-miR-376c | CUL5     | CUL5     | -       |
| hsa-miR-376c | CUX1     | CUX1     | -       |
| hsa-miR-376c | CXADR    | CXADR    | -       |
| hsa-miR-376c | -        | CXCL16   | CXCL16  |
| hsa-miR-376c | -        | CXCL2    | CXCL2   |
| hsa-miR-376c | CYB561D1 | CYB561D1 | -       |
| hsa-miR-376c | -        | CYP26A1  | CYP26A1 |
| hsa-miR-376c | CYP7A1   | CYP7A1   | -       |
| hsa-miR-376c | CYTH1    | CYTH1    | -       |
| hsa-miR-376c | CYTH4    | CYTH4    | -       |
| hsa-miR-376c | -        | DACH2    | DACH2   |
| hsa-miR-376c | DAPK1    | DAPK1    | -       |
| hsa-miR-376c | DAPK2    | DAPK2    | -       |
| hsa-miR-376c | DCAF5    | DCAF5    | -       |
| hsa-miR-376c | DCAF7    | DCAF7    | -       |
| hsa-miR-376c | DCLK1    | DCLK1    | -       |
| hsa-miR-376c | DCLK3    | DCLK3    | -       |
| hsa-miR-376c | -        | DCN      | DCN     |
| hsa-miR-376c | DCUN1D5  | DCUN1D5  | -       |
| hsa-miR-376c | DDAH1    | DDAH1    | -       |
| hsa-miR-376c | DDB2     | -        | DDB2    |
| hsa-miR-376c | DDX46    | DDX46    | -       |
| hsa-miR-376c | DENND1B  | DENND1B  | -       |
| hsa-miR-376c | DENND5B  | DENND5B  | -       |
| hsa-miR-376c | DEPDC7   | DEPDC7   | -       |
| hsa-miR-376c | DGKB     | DGKB     | -       |
| hsa-miR-376c | DIABLO   | DIABLO   | -       |
| hsa-miR-376c | DIAPH3   | DIAPH3   | -       |
| hsa-miR-376c | DIO2     | DIO2     | -       |
| hsa-miR-376c | DIP2A    | DIP2A    | -       |
| hsa-miR-376c | DIP2B    | DIP2B    | -       |
| hsa-miR-376c | DISC1    | DISC1    | -       |
| hsa-miR-376c | -        | DLG2     | DLG2    |
| hsa-miR-376c | DLL1     | DLL1     | -       |
| hsa-miR-376c | -        | DLX5     | DLX5    |
| hsa-miR-376c | DMD      | DMD      | -       |
| hsa-miR-376c | DNAJA2   | DNAJA2   | -       |
| hsa-miR-376c | -        | DNAL4    | DNAL4   |

|              |          |          |          |
|--------------|----------|----------|----------|
| hsa-miR-376c | DNM3     | DNM3     | -        |
| hsa-miR-376c | DOK6     | DOK6     | -        |
| hsa-miR-376c | DSCR3    | DSCR3    | -        |
| hsa-miR-376c | -        | DSG4     | DSG4     |
| hsa-miR-376c | -        | DTNA     | DTNA     |
| hsa-miR-376c | -        | DUSP22   | DUSP22   |
| hsa-miR-376c | DVL3     | DVL3     | -        |
| hsa-miR-376c | EBF3     | EBF3     | -        |
| hsa-miR-376c | EDEM1    | EDEM1    | -        |
| hsa-miR-376c | EFEMP1   | EFEMP1   | -        |
| hsa-miR-376c | -        | EFHC2    | EFHC2    |
| hsa-miR-376c | EHD3     | EHD3     | -        |
| hsa-miR-376c | EIF1AX   | EIF1AX   | -        |
| hsa-miR-376c | EIF2S1   | EIF2S1   | -        |
| hsa-miR-376c | EIF4B    | EIF4B    | -        |
| hsa-miR-376c | EIF4E    | EIF4E    | -        |
| hsa-miR-376c | ELF1     | ELF1     | -        |
| hsa-miR-376c | ELL2     | ELL2     | -        |
| hsa-miR-376c | ELTD1    | ELTD1    | -        |
| hsa-miR-376c | EMCN     | EMCN     | -        |
| hsa-miR-376c | EMP1     | EMP1     | -        |
| hsa-miR-376c | EMP2     | EMP2     | -        |
| hsa-miR-376c | EN2      | EN2      | -        |
| hsa-miR-376c | -        | EPB41L4A | EPB41L4A |
| hsa-miR-376c | EPB41L4B | EPB41L4B | -        |
| hsa-miR-376c | -        | EPGN     | EPGN     |
| hsa-miR-376c | EPM2A    | EPM2A    | -        |
| hsa-miR-376c | ERCC4    | ERCC4    | -        |
| hsa-miR-376c | ERCC8    | ERCC8    | -        |
| hsa-miR-376c | ERLIN2   | ERLIN2   | -        |
| hsa-miR-376c | ERMAP    | ERMAP    | -        |
| hsa-miR-376c | ERO1L    | ERO1L    | -        |
| hsa-miR-376c | ERO1LB   | ERO1LB   | -        |
| hsa-miR-376c | ERP27    | ERP27    | -        |
| hsa-miR-376c | ERP44    | ERP44    | -        |
| hsa-miR-376c | ESRRG    | ESRRG    | -        |
| hsa-miR-376c | ESYT3    | ESYT3    | -        |
| hsa-miR-376c | -        | ETNK1    | ETNK1    |
| hsa-miR-376c | -        | EXOSC7   | EXOSC7   |
| hsa-miR-376c | EXPH5    | EXPH5    | -        |
| hsa-miR-376c | F11R     | F11R     | -        |
| hsa-miR-376c | -        | F3       | F3       |
| hsa-miR-376c | FAM102B  | FAM102B  | -        |
| hsa-miR-376c | FAM13C   | FAM13C   | -        |
| hsa-miR-376c | FAM170B  | FAM170B  | -        |
| hsa-miR-376c | FAM190B  | FAM190B  | -        |
| hsa-miR-376c | FAM198B  | FAM198B  | -        |
| hsa-miR-376c | FAM19A2  | FAM19A2  | -        |
| hsa-miR-376c | FAM200B  | FAM200B  | -        |
| hsa-miR-376c | FAM26E   | FAM26E   | -        |
| hsa-miR-376c | FAM36A   | FAM36A   | -        |

|              |          |          |         |
|--------------|----------|----------|---------|
| hsa-miR-376c | -        | FAM38B   | FAM38B  |
| hsa-miR-376c | FAM40A   | FAM40A   | -       |
| hsa-miR-376c | FAM40B   | FAM40B   | -       |
| hsa-miR-376c | FAM43B   | FAM43B   | -       |
| hsa-miR-376c | FAM46C   | FAM46C   | -       |
| hsa-miR-376c | FAM49A   | FAM49A   | -       |
| hsa-miR-376c | FAM55C   | FAM55C   | -       |
| hsa-miR-376c | FAM63B   | FAM63B   | -       |
| hsa-miR-376c | FAM70A   | FAM70A   | -       |
| hsa-miR-376c | -        | FAM75A2  | FAM75A2 |
| hsa-miR-376c | -        | FAM75A3  | FAM75A3 |
| hsa-miR-376c | -        | FAM75A6  | FAM75A6 |
| hsa-miR-376c | FAM76A   | FAM76A   | -       |
| hsa-miR-376c | -        | FAP      | FAP     |
| hsa-miR-376c | -        | FBLN5    | FBLN5   |
| hsa-miR-376c | FBXL17   | FBXL17   | -       |
| hsa-miR-376c | FBXL3    | FBXL3    | -       |
| hsa-miR-376c | FBXO11   | FBXO11   | -       |
| hsa-miR-376c | FBXO28   | FBXO28   | -       |
| hsa-miR-376c | -        | FBXO38   | FBXO38  |
| hsa-miR-376c | FBXO4    | FBXO4    | -       |
| hsa-miR-376c | FBXW2    | -        | FBXW2   |
| hsa-miR-376c | FCRL5    | FCRL5    | -       |
| hsa-miR-376c | FECH     | FECH     | -       |
| hsa-miR-376c | FGB      | FGB      | -       |
| hsa-miR-376c | FGD6     | -        | FGD6    |
| hsa-miR-376c | FGF12    | FGF12    | -       |
| hsa-miR-376c | FGF2     | FGF2     | -       |
| hsa-miR-376c | -        | FHAD1    | FHAD1   |
| hsa-miR-376c | -        | FILIP1   | FILIP1  |
| hsa-miR-376c | FIP1L1   | FIP1L1   | -       |
| hsa-miR-376c | -        | FKBP1A   | FKBP1A  |
| hsa-miR-376c | FKBP5    | FKBP5    | -       |
| hsa-miR-376c | FKTN     | FKTN     | -       |
| hsa-miR-376c | FLJ42280 | FLJ42280 | -       |
| hsa-miR-376c | -        | FLT1     | FLT1    |
| hsa-miR-376c | -        | FLT3     | FLT3    |
| hsa-miR-376c | FRAS1    | FRAS1    | -       |
| hsa-miR-376c | FRG2     | FRG2     | -       |
| hsa-miR-376c | FRS2     | FRS2     | -       |
| hsa-miR-376c | FRY      | FRY      | -       |
| hsa-miR-376c | FUS      | FUS      | -       |
| hsa-miR-376c | G3BP2    | G3BP2    | -       |
| hsa-miR-376c | G6PC2    | G6PC2    | -       |
| hsa-miR-376c | GABBR1   | -        | GABBR1  |
| hsa-miR-376c | GABRG1   | GABRG1   | -       |
| hsa-miR-376c | GABRG2   | GABRG2   | -       |
| hsa-miR-376c | GALNT13  | GALNT13  | -       |
| hsa-miR-376c | GAS2     | GAS2     | -       |
| hsa-miR-376c | -        | GCA      | GCA     |
| hsa-miR-376c | GCFC1    | GCFC1    | -       |



|              |         |          |          |
|--------------|---------|----------|----------|
| hsa-miR-376c | GCH1    | GCH1     | -        |
| hsa-miR-376c | GCOM1   | GCOM1    | -        |
| hsa-miR-376c | GDAP2   | GDAP2    | -        |
| hsa-miR-376c | GEN1    | GEN1     | -        |
| hsa-miR-376c | -       | GHRHR    | GHRHR    |
| hsa-miR-376c | -       | GIMAP4   | GIMAP4   |
| hsa-miR-376c | GIMAP6  | GIMAP6   | -        |
| hsa-miR-376c | GK5     | -        | GK5      |
| hsa-miR-376c | GLG1    | GLG1     | -        |
| hsa-miR-376c | -       | GLT6D1   | GLT6D1   |
| hsa-miR-376c | GNAI1   | GNAI1    | -        |
| hsa-miR-376c | GNB1    | GNB1     | -        |
| hsa-miR-376c | -       | GNGT1    | GNGT1    |
| hsa-miR-376c | -       | GOT1     | GOT1     |
| hsa-miR-376c | GPC6    | GPC6     | -        |
| hsa-miR-376c | GPD2    | GPD2     | -        |
| hsa-miR-376c | GPM6B   | GPM6B    | -        |
| hsa-miR-376c | -       | GPRASP2  | GPRASP2  |
| hsa-miR-376c | GRAMD1C | GRAMD1C  | -        |
| hsa-miR-376c | GRB2    | GRB2     | -        |
| hsa-miR-376c | GRIA2   | GRIA2    | -        |
| hsa-miR-376c | GRIP1   | GRIP1    | -        |
| hsa-miR-376c | GRM5    | GRM5     | -        |
| hsa-miR-376c | GSK3B   | GSK3B    | -        |
| hsa-miR-376c | GSPT1   | GSPT1    | -        |
| hsa-miR-376c | -       | GSTA4    | GSTA4    |
| hsa-miR-376c | -       | GSTZ1    | GSTZ1    |
| hsa-miR-376c | -       | GTF2H3   | GTF2H3   |
| hsa-miR-376c | -       | GTF2IRD1 | GTF2IRD1 |
| hsa-miR-376c | GULP1   | GULP1    | -        |
| hsa-miR-376c | HAUS6   | HAUS6    | -        |
| hsa-miR-376c | HCN4    | HCN4     | -        |
| hsa-miR-376c | HCP5    | HCP5     | -        |
| hsa-miR-376c | -       | HDAC1    | HDAC1    |
| hsa-miR-376c | -       | HDAC8    | HDAC8    |
| hsa-miR-376c | HERC3   | HERC3    | -        |
| hsa-miR-376c | -       | HERPUD1  | HERPUD1  |
| hsa-miR-376c | -       | HIF1A    | HIF1A    |
| hsa-miR-376c | HK2     | HK2      | -        |
| hsa-miR-376c | HMG2    | HMG2     | -        |
| hsa-miR-376c | HNF1B   | HNF1B    | -        |
| hsa-miR-376c | HNMT    | HNMT     | -        |
| hsa-miR-376c | -       | HOXD10   | HOXD10   |
| hsa-miR-376c | -       | HPS3     | HPS3     |
| hsa-miR-376c | -       | HRH4     | HRH4     |
| hsa-miR-376c | HSD17B6 | HSD17B6  | -        |
| hsa-miR-376c | HSDL1   | HSDL1    | -        |
| hsa-miR-376c | IARS2   | IARS2    | -        |
| hsa-miR-376c | -       | IDH1     | IDH1     |
| hsa-miR-376c | IDS     | -        | IDS      |
| hsa-miR-376c | IGF1R   | IGF1R    | -        |

|              |          |          |          |
|--------------|----------|----------|----------|
| hsa-miR-376c | IL12A    | IL12A    | -        |
| hsa-miR-376c | -        | IL17RB   | IL17RB   |
| hsa-miR-376c | IL1RAP   | IL1RAP   | -        |
| hsa-miR-376c | -        | IL2      | IL2      |
| hsa-miR-376c | -        | IL6      | IL6      |
| hsa-miR-376c | IL8      | IL8      | -        |
| hsa-miR-376c | -        | INA      | INA      |
| hsa-miR-376c | INADL    | INADL    | -        |
| hsa-miR-376c | -        | ING3     | ING3     |
| hsa-miR-376c | IPMK     | IPMK     | -        |
| hsa-miR-376c | IRF2BP2  | IRF2BP2  | -        |
| hsa-miR-376c | IRF8     | IRF8     | -        |
| hsa-miR-376c | ITGAL    | ITGAL    | -        |
| hsa-miR-376c | IVNS1ABP | -        | IVNS1ABP |
| hsa-miR-376c | JHDM1D   | JHDM1D   | -        |
| hsa-miR-376c | JMJD1C   | JMJD1C   | -        |
| hsa-miR-376c | JMY      | JMY      | -        |
| hsa-miR-376c | JUB      | JUB      | -        |
| hsa-miR-376c | KAL1     | KAL1     | -        |
| hsa-miR-376c | KATNAL1  | KATNAL1  | -        |
| hsa-miR-376c | KCNA4    | KCNA4    | -        |
| hsa-miR-376c | -        | KCNF1    | KCNF1    |
| hsa-miR-376c | KCNJ10   | KCNJ10   | -        |
| hsa-miR-376c | -        | KCNJ15   | KCNJ15   |
| hsa-miR-376c | KCNV1    | KCNV1    | -        |
| hsa-miR-376c | KDELC2   | KDELC2   | -        |
| hsa-miR-376c | KDM5B    | KDM5B    | -        |
| hsa-miR-376c | KIAA0247 | KIAA0247 | -        |
| hsa-miR-376c | KIAA1024 | KIAA1024 | -        |
| hsa-miR-376c | KIAA1199 | KIAA1199 | -        |
| hsa-miR-376c | KIAA1239 | KIAA1239 | -        |
| hsa-miR-376c | KIAA1370 | KIAA1370 | -        |
| hsa-miR-376c | KIAA1486 | KIAA1486 | -        |
| hsa-miR-376c | KIAA1530 | KIAA1530 | -        |
| hsa-miR-376c | KIAA1549 | KIAA1549 | -        |
| hsa-miR-376c | KIAA1671 | KIAA1671 | -        |
| hsa-miR-376c | -        | KIAA1704 | KIAA1704 |
| hsa-miR-376c | KIAA1841 | KIAA1841 | -        |
| hsa-miR-376c | KIAA2022 | KIAA2022 | -        |
| hsa-miR-376c | KIF20A   | KIF20A   | -        |
| hsa-miR-376c | KIF21A   | KIF21A   | -        |
| hsa-miR-376c | KIF3A    | -        | KIF3A    |
| hsa-miR-376c | -        | KIF4A    | KIF4A    |
| hsa-miR-376c | -        | KLHDC1   | KLHDC1   |
| hsa-miR-376c | KLHL14   | KLHL14   | -        |
| hsa-miR-376c | KLHL28   | KLHL28   | -        |
| hsa-miR-376c | -        | KPNA2    | KPNA2    |
| hsa-miR-376c | KPNA3    | KPNA3    | -        |
| hsa-miR-376c | KPNA4    | KPNA4    | -        |
| hsa-miR-376c | KRAS     | KRAS     | -        |
| hsa-miR-376c | -        | KRT34    | KRT34    |

|              |         |          |          |
|--------------|---------|----------|----------|
| hsa-miR-376c | LAMC1   | LAMC1    | -        |
| hsa-miR-376c | LAMC3   | -        | LAMC3    |
| hsa-miR-376c | LANCL1  | LANCL1   | -        |
| hsa-miR-376c | LARP4   | LARP4    | -        |
| hsa-miR-376c | -       | LCT      | LCT      |
| hsa-miR-376c | LDLRAD3 | LDLRAD3  | -        |
| hsa-miR-376c | LGI2    | LGI2     | -        |
| hsa-miR-376c | LIG4    | LIG4     | -        |
| hsa-miR-376c | LIMCH1  | LIMCH1   | -        |
| hsa-miR-376c | LPHN3   | LPHN3    | -        |
| hsa-miR-376c | LPP     | LPP      | -        |
| hsa-miR-376c | LRP11   | LRP11    | -        |
| hsa-miR-376c | LRP12   | LRP12    | -        |
| hsa-miR-376c | LRP1B   | LRP1B    | -        |
| hsa-miR-376c | -       | LRRC31   | LRRC31   |
| hsa-miR-376c | -       | LRRC49   | LRRC49   |
| hsa-miR-376c | LRRC8B  | LRRC8B   | -        |
| hsa-miR-376c | LUZP2   | LUZP2    | -        |
| hsa-miR-376c | LYPLA1  | LYPLA1   | -        |
| hsa-miR-376c | LZTFL1  | LZTFL1   | -        |
| hsa-miR-376c | MAGT1   | MAGT1    | -        |
| hsa-miR-376c | -       | MALL     | MALL     |
| hsa-miR-376c | -       | MAMDC2   | MAMDC2   |
| hsa-miR-376c | -       | MAP4K3   | MAP4K3   |
| hsa-miR-376c | MAP4K4  | MAP4K4   | -        |
| hsa-miR-376c | MAP6    | MAP6     | -        |
| hsa-miR-376c | MAP9    | MAP9     | -        |
| hsa-miR-376c | -       | MAPKAPK5 | MAPKAPK5 |
| hsa-miR-376c | MBNL2   | MBNL2    | -        |
| hsa-miR-376c | MBNL3   | MBNL3    | -        |
| hsa-miR-376c | MCM3    | -        | MCM3     |
| hsa-miR-376c | MCTS1   | -        | MCTS1    |
| hsa-miR-376c | MED1    | MED1     | -        |
| hsa-miR-376c | MEGF10  | MEGF10   | -        |
| hsa-miR-376c | MEIS2   | MEIS2    | -        |
| hsa-miR-376c | -       | MEPE     | MEPE     |
| hsa-miR-376c | METTL7A | METTL7A  | -        |
| hsa-miR-376c | MFAP3L  | MFAP3L   | -        |
| hsa-miR-376c | MFAP5   | MFAP5    | -        |
| hsa-miR-376c | MIER3   | MIER3    | -        |
| hsa-miR-376c | MIPOL1  | MIPOL1   | -        |
| hsa-miR-376c | MKL2    | MKL2     | -        |
| hsa-miR-376c | -       | MKX      | MKX      |
| hsa-miR-376c | MMAA    | MMAA     | -        |
| hsa-miR-376c | MMADHC  | MMADHC   | -        |
| hsa-miR-376c | -       | MORF4L2  | MORF4L2  |
| hsa-miR-376c | MOSPD2  | MOSPD2   | -        |
| hsa-miR-376c | MRPL30  | MRPL30   | -        |
| hsa-miR-376c | MRPL32  | -        | MRPL32   |
| hsa-miR-376c | -       | MRPS18C  | MRPS18C  |
| hsa-miR-376c | MRPS23  | -        | MRPS23   |

|              |          |          |        |
|--------------|----------|----------|--------|
| hsa-miR-376c | -        | MSH4     | MSH4   |
| hsa-miR-376c | MSR1     | MSR1     | -      |
| hsa-miR-376c | MSX1     | MSX1     | -      |
| hsa-miR-376c | -        | MT2A     | MT2A   |
| hsa-miR-376c | MTPAP    | MTPAP    | -      |
| hsa-miR-376c | MUC20    | -        | MUC20  |
| hsa-miR-376c | MYNN     | MYNN     | -      |
| hsa-miR-376c | MYO10    | MYO10    | -      |
| hsa-miR-376c | MYT1L    | MYT1L    | -      |
| hsa-miR-376c | NAA50    | NAA50    | -      |
| hsa-miR-376c | NAB1     | NAB1     | -      |
| hsa-miR-376c | NAP1L5   | NAP1L5   | -      |
| hsa-miR-376c | NCOA1    | NCOA1    | -      |
| hsa-miR-376c | NCOA7    | NCOA7    | -      |
| hsa-miR-376c | NDFIP1   | NDFIP1   | -      |
| hsa-miR-376c | NDFIP2   | NDFIP2   | -      |
| hsa-miR-376c | NDUFV3   | -        | NDUFV3 |
| hsa-miR-376c | -        | NEFH     | NEFH   |
| hsa-miR-376c | -        | NEIL3    | NEIL3  |
| hsa-miR-376c | NF1      | NF1      | -      |
| hsa-miR-376c | NFAT5    | NFAT5    | -      |
| hsa-miR-376c | -        | NFE2L2   | NFE2L2 |
| hsa-miR-376c | NFE2L3   | NFE2L3   | -      |
| hsa-miR-376c | -        | NFKBIZ   | NFKBIZ |
| hsa-miR-376c | NKD1     | NKD1     | -      |
| hsa-miR-376c | NKX3-2   | NKX3-2   | -      |
| hsa-miR-376c | NLRC3    | NLRC3    | -      |
| hsa-miR-376c | NPY2R    | NPY2R    | -      |
| hsa-miR-376c | NR1D2    | NR1D2    | -      |
| hsa-miR-376c | NR2F2    | NR2F2    | -      |
| hsa-miR-376c | NR4A2    | NR4A2    | -      |
| hsa-miR-376c | NRG1     | NRG1     | -      |
| hsa-miR-376c | NRP1     | NRP1     | -      |
| hsa-miR-376c | NRSN1    | NRSN1    | -      |
| hsa-miR-376c | NTRK2    | NTRK2    | -      |
| hsa-miR-376c | NUDT21   | NUDT21   | -      |
| hsa-miR-376c | -        | NXF2     | NXF2   |
| hsa-miR-376c | -        | OCIAD1   | OCIAD1 |
| hsa-miR-376c | -        | OMA1     | OMA1   |
| hsa-miR-376c | -        | OMG      | OMG    |
| hsa-miR-376c | OPA1     | OPA1     | -      |
| hsa-miR-376c | OPCML    | OPCML    | -      |
| hsa-miR-376c | -        | OR11A1   | OR11A1 |
| hsa-miR-376c | -        | OR2H2    | OR2H2  |
| hsa-miR-376c | OSGIN2   | OSGIN2   | -      |
| hsa-miR-376c | OTUD4    | OTUD4    | -      |
| hsa-miR-376c | PAFAH1B1 | PAFAH1B1 | -      |
| hsa-miR-376c | PAN3     | PAN3     | -      |
| hsa-miR-376c | PAPD7    | PAPD7    | -      |
| hsa-miR-376c | PAPSS2   | PAPSS2   | -      |
| hsa-miR-376c | -        | PARP4    | PARP4  |

|              |          |          |          |
|--------------|----------|----------|----------|
| hsa-miR-376c | PAX6     | PAX6     | -        |
| hsa-miR-376c | PCBP2    | PCBP2    | -        |
| hsa-miR-376c | -        | PCF11    | PCF11    |
| hsa-miR-376c | PCLO     | PCLO     | -        |
| hsa-miR-376c | PCNX     | PCNX     | -        |
| hsa-miR-376c | -        | PCOLCE2  | PCOLCE2  |
| hsa-miR-376c | -        | PCP4     | PCP4     |
| hsa-miR-376c | PDE10A   | PDE10A   | -        |
| hsa-miR-376c | PDE4B    | PDE4B    | -        |
| hsa-miR-376c | PDE5A    | PDE5A    | -        |
| hsa-miR-376c | PDGFRA   | PDGFRA   | -        |
| hsa-miR-376c | PGAM1    | PGAM1    | -        |
| hsa-miR-376c | -        | PGBD1    | PGBD1    |
| hsa-miR-376c | PGM2     | PGM2     | -        |
| hsa-miR-376c | PHC3     | PHC3     | -        |
| hsa-miR-376c | PHIP     | PHIP     | -        |
| hsa-miR-376c | PHLDA1   | PHLDA1   | -        |
| hsa-miR-376c | -        | PHLDA2   | PHLDA2   |
| hsa-miR-376c | PHTF2    | PHTF2    | -        |
| hsa-miR-376c | PKIA     | PKIA     | -        |
| hsa-miR-376c | -        | PLAC8    | PLAC8    |
| hsa-miR-376c | PLDN     | PLDN     | -        |
| hsa-miR-376c | PLEKHA1  | PLEKHA1  | -        |
| hsa-miR-376c | PLEKHA5  | PLEKHA5  | -        |
| hsa-miR-376c | PLXNC1   | -        | PLXNC1   |
| hsa-miR-376c | PNRC1    | PNRC1    | -        |
| hsa-miR-376c | -        | POLI     | POLI     |
| hsa-miR-376c | PPAP2B   | PPAP2B   | -        |
| hsa-miR-376c | PPARA    | PPARA    | -        |
| hsa-miR-376c | PPFIA1   | PPFIA1   | -        |
| hsa-miR-376c | -        | PPP1R12A | PPP1R12A |
| hsa-miR-376c | PPP1R14C | PPP1R14C | -        |
| hsa-miR-376c | PPP2R3A  | PPP2R3A  | -        |
| hsa-miR-376c | PPP2R5C  | PPP2R5C  | -        |
| hsa-miR-376c | PPP6C    | PPP6C    | -        |
| hsa-miR-376c | PRDM2    | PRDM2    | -        |
| hsa-miR-376c | -        | PRDX3    | PRDX3    |
| hsa-miR-376c | PREP     | -        | PREP     |
| hsa-miR-376c | PRR12    | PRR12    | -        |
| hsa-miR-376c | PRR23B   | PRR23B   | -        |
| hsa-miR-376c | PRR5L    | PRR5L    | -        |
| hsa-miR-376c | PRRX1    | PRRX1    | -        |
| hsa-miR-376c | PSD3     | PSD3     | -        |
| hsa-miR-376c | -        | PSMB5    | PSMB5    |
| hsa-miR-376c | -        | PSMD10   | PSMD10   |
| hsa-miR-376c | PTBP2    | PTBP2    | -        |
| hsa-miR-376c | PTEN     | PTEN     | -        |
| hsa-miR-376c | PTGFR    | PTGFR    | -        |
| hsa-miR-376c | PTHLH    | PTHLH    | -        |
| hsa-miR-376c | PTPRB    | PTPRB    | -        |
| hsa-miR-376c | PTPRC    | PTPRC    | -        |

|              |          |          |         |
|--------------|----------|----------|---------|
| hsa-miR-376c | PTPRD    | PTPRD    | -       |
| hsa-miR-376c | -        | PTPRK    | PTPRK   |
| hsa-miR-376c | PTPRZ1   | PTPRZ1   | -       |
| hsa-miR-376c | -        | PTS      | PTS     |
| hsa-miR-376c | -        | PURG     | PURG    |
| hsa-miR-376c | PWWP2A   | PWWP2A   | -       |
| hsa-miR-376c | RAB10    | RAB10    | -       |
| hsa-miR-376c | RAB11A   | RAB11A   | -       |
| hsa-miR-376c | RAB27B   | RAB27B   | -       |
| hsa-miR-376c | -        | RAB28    | RAB28   |
| hsa-miR-376c | RAB2A    | RAB2A    | -       |
| hsa-miR-376c | RABGEF1  | RABGEF1  | -       |
| hsa-miR-376c | RAD21    | RAD21    | -       |
| hsa-miR-376c | RALGAPA1 | RALGAPA1 | -       |
| hsa-miR-376c | RAP1B    | RAP1B    | -       |
| hsa-miR-376c | RAPGEF2  | RAPGEF2  | -       |
| hsa-miR-376c | -        | RASA1    | RASA1   |
| hsa-miR-376c | -        | RASL11B  | RASL11B |
| hsa-miR-376c | RAVER2   | RAVER2   | -       |
| hsa-miR-376c | RBM26    | RBM26    | -       |
| hsa-miR-376c | RBMS1    | RBMS1    | -       |
| hsa-miR-376c | -        | RBX1     | RBX1    |
| hsa-miR-376c | RCBTB1   | RCBTB1   | -       |
| hsa-miR-376c | REPS2    | REPS2    | -       |
| hsa-miR-376c | REV3L    | REV3L    | -       |
| hsa-miR-376c | RFWD3    | RFWD3    | -       |
| hsa-miR-376c | RFX6     | RFX6     | -       |
| hsa-miR-376c | RFXAP    | RFXAP    | -       |
| hsa-miR-376c | RGS5     | RGS5     | -       |
| hsa-miR-376c | RIMS3    | RIMS3    | -       |
| hsa-miR-376c | -        | RIT2     | RIT2    |
| hsa-miR-376c | -        | RLF      | RLF     |
| hsa-miR-376c | -        | RNASEN   | RNASEN  |
| hsa-miR-376c | RND3     | RND3     | -       |
| hsa-miR-376c | RNF11    | RNF11    | -       |
| hsa-miR-376c | RNF13    | RNF13    | -       |
| hsa-miR-376c | RNF169   | RNF169   | -       |
| hsa-miR-376c | RNF187   | RNF187   | -       |
| hsa-miR-376c | RNF219   | RNF219   | -       |
| hsa-miR-376c | RNF4     | RNF4     | -       |
| hsa-miR-376c | ROD1     | ROD1     | -       |
| hsa-miR-376c | RORB     | RORB     | -       |
| hsa-miR-376c | RP1      | RP1      | -       |
| hsa-miR-376c | RP2      | RP2      | -       |
| hsa-miR-376c | RPL11    | RPL11    | -       |
| hsa-miR-376c | -        | RPL34    | RPL34   |
| hsa-miR-376c | RPS6KA6  | RPS6KA6  | -       |
| hsa-miR-376c | RPS6KB1  | RPS6KB1  | -       |
| hsa-miR-376c | RPTN     | RPTN     | -       |
| hsa-miR-376c | RRP15    | RRP15    | -       |
| hsa-miR-376c | RUNX1    | RUNX1    | -       |

|              |          |          |          |
|--------------|----------|----------|----------|
| hsa-miR-376c | RUNX1T1  | RUNX1T1  | -        |
| hsa-miR-376c | SAMD4A   | SAMD4A   | -        |
| hsa-miR-376c | SAMD5    | SAMD5    | -        |
| hsa-miR-376c | SAP30L   | SAP30L   | -        |
| hsa-miR-376c | SASH1    | SASH1    | -        |
| hsa-miR-376c | SATB1    | SATB1    | -        |
| hsa-miR-376c | SATB2    | SATB2    | -        |
| hsa-miR-376c | SBNO2    | SBNO2    | -        |
| hsa-miR-376c | -        | SCAMP2   | SCAMP2   |
| hsa-miR-376c | SCML4    | -        | SCML4    |
| hsa-miR-376c | -        | SCN11A   | SCN11A   |
| hsa-miR-376c | SCP2     | SCP2     | -        |
| hsa-miR-376c | -        | SCPEP1   | SCPEP1   |
| hsa-miR-376c | SDC2     | SDC2     | -        |
| hsa-miR-376c | SDC4     | SDC4     | -        |
| hsa-miR-376c | -        | SEC22C   | SEC22C   |
| hsa-miR-376c | -        | SEC61B   | SEC61B   |
| hsa-miR-376c | -        | SEC61G   | SEC61G   |
| hsa-miR-376c | SEC62    | SEC62    | -        |
| hsa-miR-376c | SENP1    | SENP1    | -        |
| hsa-miR-376c | SEPT14   | SEPT14   | -        |
| hsa-miR-376c | SESTD1   | SESTD1   | -        |
| hsa-miR-376c | SET      | SET      | -        |
| hsa-miR-376c | SETBP1   | SETBP1   | -        |
| hsa-miR-376c | SETD1B   | SETD1B   | -        |
| hsa-miR-376c | SETD2    | SETD2    | -        |
| hsa-miR-376c | SETD7    | SETD7    | -        |
| hsa-miR-376c | SFMBT2   | -        | SFMBT2   |
| hsa-miR-376c | -        | SFT2D1   | SFT2D1   |
| hsa-miR-376c | -        | SGK2     | SGK2     |
| hsa-miR-376c | SGK3     | SGK3     | -        |
| hsa-miR-376c | SH3RF1   | SH3RF1   | -        |
| hsa-miR-376c | SHANK2   | SHANK2   | -        |
| hsa-miR-376c | SHANK3   | SHANK3   | -        |
| hsa-miR-376c | SHOX2    | SHOX2    | -        |
| hsa-miR-376c | -        | SIAH2    | SIAH2    |
| hsa-miR-376c | SIPA1L3  | SIPA1L3  | -        |
| hsa-miR-376c | SLAIN2   | SLAIN2   | -        |
| hsa-miR-376c | SLAMF6   | SLAMF6   | -        |
| hsa-miR-376c | SLC12A5  | SLC12A5  | -        |
| hsa-miR-376c | -        | SLC12A8  | SLC12A8  |
| hsa-miR-376c | SLC15A2  | -        | SLC15A2  |
| hsa-miR-376c | SLC17A4  | SLC17A4  | -        |
| hsa-miR-376c | SLC1A2   | SLC1A2   | -        |
| hsa-miR-376c | SLC22A3  | SLC22A3  | -        |
| hsa-miR-376c | SLC24A4  | SLC24A4  | -        |
| hsa-miR-376c | -        | SLC25A14 | SLC25A14 |
| hsa-miR-376c | SLC25A21 | SLC25A21 | -        |
| hsa-miR-376c | -        | SLC25A43 | SLC25A43 |
| hsa-miR-376c | -        | SLC25A6  | SLC25A6  |
| hsa-miR-376c | SLC26A4  | SLC26A4  | -        |

|              |         |         |         |
|--------------|---------|---------|---------|
| hsa-miR-376c | SLC2A12 | SLC2A12 | -       |
| hsa-miR-376c | SLC2A5  | -       | SLC2A5  |
| hsa-miR-376c | -       | SLC35D2 | SLC35D2 |
| hsa-miR-376c | -       | SLC45A2 | SLC45A2 |
| hsa-miR-376c | SLC4A10 | SLC4A10 | -       |
| hsa-miR-376c | SLC5A9  | SLC5A9  | -       |
| hsa-miR-376c | SLC6A15 | SLC6A15 | -       |
| hsa-miR-376c | SLC6A6  | SLC6A6  | -       |
| hsa-miR-376c | SLC7A11 | SLC7A11 | -       |
| hsa-miR-376c | SMAD5   | SMAD5   | -       |
| hsa-miR-376c | -       | SMARCA1 | SMARCA1 |
| hsa-miR-376c | -       | SMARCD2 | SMARCD2 |
| hsa-miR-376c | SMURF1  | SMURF1  | -       |
| hsa-miR-376c | SNAP29  | SNAP29  | -       |
| hsa-miR-376c | -       | SNCB    | SNCB    |
| hsa-miR-376c | SNTB2   | SNTB2   | -       |
| hsa-miR-376c | SNX18   | SNX18   | -       |
| hsa-miR-376c | SOCS5   | SOCS5   | -       |
| hsa-miR-376c | SOCS6   | SOCS6   | -       |
| hsa-miR-376c | SOX6    | SOX6    | -       |
| hsa-miR-376c | SP3     | SP3     | -       |
| hsa-miR-376c | -       | SPATA16 | SPATA16 |
| hsa-miR-376c | SPEF2   | SPEF2   | -       |
| hsa-miR-376c | -       | SPESP1  | SPESP1  |
| hsa-miR-376c | SPHKAP  | SPHKAP  | -       |
| hsa-miR-376c | SPINLW1 | SPINLW1 | -       |
| hsa-miR-376c | SPOPL   | SPOPL   | -       |
| hsa-miR-376c | -       | SPP1    | SPP1    |
| hsa-miR-376c | SPTBN1  | SPTBN1  | -       |
| hsa-miR-376c | SRGAP3  | SRGAP3  | -       |
| hsa-miR-376c | SSFA2   | SSFA2   | -       |
| hsa-miR-376c | SSPN    | SSPN    | -       |
| hsa-miR-376c | ST13    | ST13    | -       |
| hsa-miR-376c | ST7L    | ST7L    | -       |
| hsa-miR-376c | ST8SIA1 | -       | ST8SIA1 |
| hsa-miR-376c | ST8SIA4 | ST8SIA4 | -       |
| hsa-miR-376c | STEAP2  | STEAP2  | -       |
| hsa-miR-376c | STX11   | -       | STX11   |
| hsa-miR-376c | STXBP5  | STXBP5  | -       |
| hsa-miR-376c | -       | SUV39H2 | SUV39H2 |
| hsa-miR-376c | SUZ12   | SUZ12   | -       |
| hsa-miR-376c | -       | SYNCRIP | SYNCRIP |
| hsa-miR-376c | -       | SYT16   | SYT16   |
| hsa-miR-376c | TAB2    | TAB2    | -       |
| hsa-miR-376c | TAB3    | TAB3    | -       |
| hsa-miR-376c | TAF5L   | TAF5L   | -       |
| hsa-miR-376c | TBC1D14 | TBC1D14 | -       |
| hsa-miR-376c | -       | TBC1D8  | TBC1D8  |
| hsa-miR-376c | -       | TCEAL2  | TCEAL2  |
| hsa-miR-376c | TCEB3   | TCEB3   | -       |
| hsa-miR-376c | -       | TDP1    | TDP1    |



|              |          |          |          |
|--------------|----------|----------|----------|
| hsa-miR-376c | -        | TDRKH    | TDRKH    |
| hsa-miR-376c | TEDDM1   | TEDDM1   | -        |
| hsa-miR-376c | -        | TESK2    | TESK2    |
| hsa-miR-376c | TFEC     | TFEC     | -        |
| hsa-miR-376c | TGFB2    | TGFB2    | -        |
| hsa-miR-376c | TGFBR3   | TGFBR3   | -        |
| hsa-miR-376c | THEMIS   | THEMIS   | -        |
| hsa-miR-376c | -        | TIAL1    | TIAL1    |
| hsa-miR-376c | TIAM1    | TIAM1    | -        |
| hsa-miR-376c | TLR10    | -        | TLR10    |
| hsa-miR-376c | TLR2     | TLR2     | -        |
| hsa-miR-376c | -        | TM2D3    | TM2D3    |
| hsa-miR-376c | TM4SF20  | TM4SF20  | -        |
| hsa-miR-376c | -        | TM7SF4   | TM7SF4   |
| hsa-miR-376c | TM9SF3   | TM9SF3   | -        |
| hsa-miR-376c | TMED10   | TMED10   | -        |
| hsa-miR-376c | -        | TMEM128  | TMEM128  |
| hsa-miR-376c | TMEM132B | TMEM132B | -        |
| hsa-miR-376c | TMEM132C | TMEM132C | -        |
| hsa-miR-376c | TMEM215  | TMEM215  | -        |
| hsa-miR-376c | TMEM47   | TMEM47   | -        |
| hsa-miR-376c | -        | TMEM50A  | TMEM50A  |
| hsa-miR-376c | TMEM50B  | TMEM50B  | -        |
| hsa-miR-376c | TMEM55A  | TMEM55A  | -        |
| hsa-miR-376c | -        | TMEM59L  | TMEM59L  |
| hsa-miR-376c | -        | TMEM60   | TMEM60   |
| hsa-miR-376c | -        | TMEM71   | TMEM71   |
| hsa-miR-376c | -        | TMEM80   | TMEM80   |
| hsa-miR-376c | TMF1     | TMF1     | -        |
| hsa-miR-376c | -        | TMPRSS12 | TMPRSS12 |
| hsa-miR-376c | -        | TNFAIP6  | TNFAIP6  |
| hsa-miR-376c | -        | TNFAIP8  | TNFAIP8  |
| hsa-miR-376c | -        | TNN      | TNN      |
| hsa-miR-376c | TNS3     | TNS3     | -        |
| hsa-miR-376c | -        | TOMM22   | TOMM22   |
| hsa-miR-376c | TOX      | TOX      | -        |
| hsa-miR-376c | -        | TRIM16L  | TRIM16L  |
| hsa-miR-376c | TRIM22   | TRIM22   | -        |
| hsa-miR-376c | TRIM33   | TRIM33   | -        |
| hsa-miR-376c | TRIM67   | -        | TRIM67   |
| hsa-miR-376c | TRPS1    | TRPS1    | -        |
| hsa-miR-376c | -        | TSPAN13  | TSPAN13  |
| hsa-miR-376c | TSTD2    | TSTD2    | -        |
| hsa-miR-376c | -        | TTBK2    | TTBK2    |
| hsa-miR-376c | -        | TTC5     | TTC5     |
| hsa-miR-376c | -        | TTN      | TTN      |
| hsa-miR-376c | -        | TXK      | TXK      |
| hsa-miR-376c | -        | UBE2E1   | UBE2E1   |
| hsa-miR-376c | UBE2NL   | UBE2NL   | -        |
| hsa-miR-376c | UBE2O    | UBE2O    | -        |
| hsa-miR-376c | UBTD2    | UBTD2    | -        |

|              |         |         |         |
|--------------|---------|---------|---------|
| hsa-miR-376c | -       | UCKL1   | UCKL1   |
| hsa-miR-376c | UGDH    | UGDH    | -       |
| hsa-miR-376c | -       | UGT2B15 | UGT2B15 |
| hsa-miR-376c | -       | UGT2B17 | UGT2B17 |
| hsa-miR-376c | -       | UIMC1   | UIMC1   |
| hsa-miR-376c | UNC80   | UNC80   | -       |
| hsa-miR-376c | -       | UQCRH   | UQCRH   |
| hsa-miR-376c | USP1    | USP1    | -       |
| hsa-miR-376c | USP43   | USP43   | -       |
| hsa-miR-376c | UTRN    | UTRN    | -       |
| hsa-miR-376c | VAMP4   | VAMP4   | -       |
| hsa-miR-376c | VAPB    | VAPB    | -       |
| hsa-miR-376c | -       | VCAM1   | VCAM1   |
| hsa-miR-376c | VEZF1   | VEZF1   | -       |
| hsa-miR-376c | VPS13A  | VPS13A  | -       |
| hsa-miR-376c | VPS13D  | VPS13D  | -       |
| hsa-miR-376c | VTA1    | VTA1    | -       |
| hsa-miR-376c | -       | VTI1A   | VTI1A   |
| hsa-miR-376c | WBP4    | WBP4    | -       |
| hsa-miR-376c | -       | WDR33   | WDR33   |
| hsa-miR-376c | WDR44   | WDR44   | -       |
| hsa-miR-376c | -       | WDR64   | WDR64   |
| hsa-miR-376c | WDR7    | WDR7    | -       |
| hsa-miR-376c | WDR72   | WDR72   | -       |
| hsa-miR-376c | -       | WFDC6   | WFDC6   |
| hsa-miR-376c | WIPF3   | WIPF3   | -       |
| hsa-miR-376c | WIZ     | WIZ     | -       |
| hsa-miR-376c | WWP2    | WWP2    | -       |
| hsa-miR-376c | XPNPEP3 | XPNPEP3 | -       |
| hsa-miR-376c | XPO4    | XPO4    | -       |
| hsa-miR-376c | XRN1    | XRN1    | -       |
| hsa-miR-376c | ZBTB11  | -       | ZBTB11  |
| hsa-miR-376c | ZBTB34  | ZBTB34  | -       |
| hsa-miR-376c | ZBTB8B  | ZBTB8B  | -       |
| hsa-miR-376c | ZCCHC2  | ZCCHC2  | -       |
| hsa-miR-376c | ZCCHC5  | ZCCHC5  | -       |
| hsa-miR-376c | -       | ZDHHC15 | ZDHHC15 |
| hsa-miR-376c | ZDHHC2  | ZDHHC2  | -       |
| hsa-miR-376c | ZFC3H1  | ZFC3H1  | -       |
| hsa-miR-376c | ZFHX3   | ZFHX3   | -       |
| hsa-miR-376c | ZFP3    | ZFP3    | -       |
| hsa-miR-376c | -       | ZFP62   | ZFP62   |
| hsa-miR-376c | ZFYVE16 | ZFYVE16 | -       |
| hsa-miR-376c | ZMYM3   | ZMYM3   | -       |
| hsa-miR-376c | ZNF12   | ZNF12   | -       |
| hsa-miR-376c | -       | ZNF121  | ZNF121  |
| hsa-miR-376c | ZNF146  | ZNF146  | -       |
| hsa-miR-376c | -       | ZNF169  | ZNF169  |
| hsa-miR-376c | -       | ZNF235  | ZNF235  |
| hsa-miR-376c | ZNF254  | ZNF254  | -       |
| hsa-miR-376c | ZNF281  | ZNF281  | -       |

|              |         |          |          |
|--------------|---------|----------|----------|
| hsa-miR-376c | ZNF295  | ZNF295   | -        |
| hsa-miR-376c | ZNF33A  | ZNF33A   | -        |
| hsa-miR-376c | ZNF33B  | ZNF33B   | -        |
| hsa-miR-376c | ZNF385B | ZNF385B  | -        |
| hsa-miR-376c | ZNF441  | ZNF441   | -        |
| hsa-miR-376c | -       | ZNF443   | ZNF443   |
| hsa-miR-376c | ZNF493  | ZNF493   | -        |
| hsa-miR-376c | -       | ZNF503   | ZNF503   |
| hsa-miR-376c | ZNF530  | ZNF530   | -        |
| hsa-miR-376c | ZNF546  | ZNF546   | -        |
| hsa-miR-376c | ZNF547  | ZNF547   | -        |
| hsa-miR-376c | ZNF609  | ZNF609   | -        |
| hsa-miR-376c | ZNF618  | ZNF618   | -        |
| hsa-miR-376c | ZNF626  | ZNF626   | -        |
| hsa-miR-376c | -       | ZNF643   | ZNF643   |
| hsa-miR-376c | ZNF674  | ZNF674   | -        |
| hsa-miR-376c | ZNF709  | ZNF709   | -        |
| hsa-miR-376c | ZNF714  | ZNF714   | -        |
| hsa-miR-376c | ZNF746  | ZNF746   | -        |
| hsa-miR-376c | -       | ZNF774   | ZNF774   |
| hsa-miR-376c | ZNF780B | ZNF780B  | -        |
| hsa-miR-376c | -       | ZNF799   | ZNF799   |
| hsa-miR-376c | -       | ZNF804A  | ZNF804A  |
| hsa-miR-376c | ZSWIM6  | ZSWIM6   | -        |
| hsa-miR-376c | ZXDB    | ZXDB     | -        |
| hsa-miR-378* | -       | A2ML1    | A2ML1    |
| hsa-miR-378* | -       | ABCB5    | ABCB5    |
| hsa-miR-378* | -       | ABCB9    | ABCB9    |
| hsa-miR-378* | -       | ACOT8    | ACOT8    |
| hsa-miR-378* | -       | ACTC1    | ACTC1    |
| hsa-miR-378* | -       | ACTR1A   | ACTR1A   |
| hsa-miR-378* | -       | ADAM20   | ADAM20   |
| hsa-miR-378* | -       | ADORA2B  | ADORA2B  |
| hsa-miR-378* | -       | ALPK1    | ALPK1    |
| hsa-miR-378* | -       | ANP32A   | ANP32A   |
| hsa-miR-378* | -       | APOF     | APOF     |
| hsa-miR-378* | -       | ATF3     | ATF3     |
| hsa-miR-378* | -       | ATF4     | ATF4     |
| hsa-miR-378* | -       | ATG16L2  | ATG16L2  |
| hsa-miR-378* | -       | ATP13A2  | ATP13A2  |
| hsa-miR-378* | -       | ATPAF2   | ATPAF2   |
| hsa-miR-378* | -       | B3GALT1  | B3GALT1  |
| hsa-miR-378* | -       | B4GALNT3 | B4GALNT3 |
| hsa-miR-378* | -       | BEST1    | BEST1    |
| hsa-miR-378* | -       | C11orf67 | C11orf67 |
| hsa-miR-378* | -       | C11orf75 | C11orf75 |
| hsa-miR-378* | -       | C12orf65 | C12orf65 |
| hsa-miR-378* | -       | C14orf2  | C14orf2  |
| hsa-miR-378* | -       | C15orf42 | C15orf42 |
| hsa-miR-378* | -       | C17orf77 | C17orf77 |
| hsa-miR-378* | -       | C19orf34 | C19orf34 |

|              |   |           |           |
|--------------|---|-----------|-----------|
| hsa-miR-378* | - | C19orf53  | C19orf53  |
| hsa-miR-378* | - | C2        | C2        |
| hsa-miR-378* | - | C20orf107 | C20orf107 |
| hsa-miR-378* | - | C3orf65   | C3orf65   |
| hsa-miR-378* | - | C6orf59   | C6orf59   |
| hsa-miR-378* | - | C7orf11   | C7orf11   |
| hsa-miR-378* | - | C9orf102  | C9orf102  |
| hsa-miR-378* | - | C9orf78   | C9orf78   |
| hsa-miR-378* | - | CACNA1S   | CACNA1S   |
| hsa-miR-378* | - | CASC1     | CASC1     |
| hsa-miR-378* | - | CASP6     | CASP6     |
| hsa-miR-378* | - | CCDC78    | CCDC78    |
| hsa-miR-378* | - | CCL5      | CCL5      |
| hsa-miR-378* | - | CD300LG   | CD300LG   |
| hsa-miR-378* | - | CDAN1     | CDAN1     |
| hsa-miR-378* | - | CFLAR     | CFLAR     |
| hsa-miR-378* | - | CHMP4C    | CHMP4C    |
| hsa-miR-378* | - | CLDN15    | CLDN15    |
| hsa-miR-378* | - | CLEC4M    | CLEC4M    |
| hsa-miR-378* | - | CNNM2     | CNNM2     |
| hsa-miR-378* | - | COL11A2   | COL11A2   |
| hsa-miR-378* | - | COPE      | COPE      |
| hsa-miR-378* | - | COPZ1     | COPZ1     |
| hsa-miR-378* | - | COPZ2     | COPZ2     |
| hsa-miR-378* | - | CPT2      | CPT2      |
| hsa-miR-378* | - | CRB1      | CRB1      |
| hsa-miR-378* | - | CREB3     | CREB3     |
| hsa-miR-378* | - | CSF2RA    | CSF2RA    |
| hsa-miR-378* | - | CXorf21   | CXorf21   |
| hsa-miR-378* | - | CXorf26   | CXorf26   |
| hsa-miR-378* | - | CXorf41   | CXorf41   |
| hsa-miR-378* | - | CYP2E1    | CYP2E1    |
| hsa-miR-378* | - | DFNB31    | DFNB31    |
| hsa-miR-378* | - | DIS3L     | DIS3L     |
| hsa-miR-378* | - | DNASE2    | DNASE2    |
| hsa-miR-378* | - | DYDC1     | DYDC1     |
| hsa-miR-378* | - | DYNC2LI1  | DYNC2LI1  |
| hsa-miR-378* | - | ELOVL1    | ELOVL1    |
| hsa-miR-378* | - | EPDR1     | EPDR1     |
| hsa-miR-378* | - | ERO1LB    | ERO1LB    |
| hsa-miR-378* | - | EXT2      | EXT2      |
| hsa-miR-378* | - | FADS1     | FADS1     |
| hsa-miR-378* | - | FAIM      | FAIM      |
| hsa-miR-378* | - | FAM120B   | FAM120B   |
| hsa-miR-378* | - | FBXO6     | FBXO6     |
| hsa-miR-378* | - | FCN2      | FCN2      |
| hsa-miR-378* | - | FEZ1      | FEZ1      |
| hsa-miR-378* | - | FGFR2     | FGFR2     |
| hsa-miR-378* | - | FRAS1     | FRAS1     |
| hsa-miR-378* | - | FSHR      | FSHR      |
| hsa-miR-378* | - | FTSJ2     | FTSJ2     |

|              |   |           |           |
|--------------|---|-----------|-----------|
| hsa-miR-378* | - | FUT7      | FUT7      |
| hsa-miR-378* | - | GATAD2A   | GATAD2A   |
| hsa-miR-378* | - | GDPD1     | GDPD1     |
| hsa-miR-378* | - | GLB1L     | GLB1L     |
| hsa-miR-378* | - | GLT25D2   | GLT25D2   |
| hsa-miR-378* | - | GNL3L     | GNL3L     |
| hsa-miR-378* | - | GPRC5C    | GPRC5C    |
| hsa-miR-378* | - | GRM2      | GRM2      |
| hsa-miR-378* | - | HDAC8     | HDAC8     |
| hsa-miR-378* | - | HEATR3    | HEATR3    |
| hsa-miR-378* | - | HLA-E     | HLA-E     |
| hsa-miR-378* | - | HMGCL     | HMGCL     |
| hsa-miR-378* | - | HSPG2     | HSPG2     |
| hsa-miR-378* | - | HTR4      | HTR4      |
| hsa-miR-378* | - | HUWE1     | HUWE1     |
| hsa-miR-378* | - | IL10      | IL10      |
| hsa-miR-378* | - | IL10RB    | IL10RB    |
| hsa-miR-378* | - | ILDR1     | ILDR1     |
| hsa-miR-378* | - | IMP4      | IMP4      |
| hsa-miR-378* | - | ING1      | ING1      |
| hsa-miR-378* | - | INHBE     | INHBE     |
| hsa-miR-378* | - | ITGB2     | ITGB2     |
| hsa-miR-378* | - | ITIH5     | ITIH5     |
| hsa-miR-378* | - | KRT72     | KRT72     |
| hsa-miR-378* | - | LAD1      | LAD1      |
| hsa-miR-378* | - | LCE1E     | LCE1E     |
| hsa-miR-378* | - | LOC388564 | LOC388564 |
| hsa-miR-378* | - | MAP3K11   | MAP3K11   |
| hsa-miR-378* | - | MARK4     | MARK4     |
| hsa-miR-378* | - | MCM2      | MCM2      |
| hsa-miR-378* | - | MCM4      | MCM4      |
| hsa-miR-378* | - | MDC1      | MDC1      |
| hsa-miR-378* | - | METTL6    | METTL6    |
| hsa-miR-378* | - | MMAB      | MMAB      |
| hsa-miR-378* | - | MPPE1     | MPPE1     |
| hsa-miR-378* | - | MRPL43    | MRPL43    |
| hsa-miR-378* | - | MYOM3     | MYOM3     |
| hsa-miR-378* | - | MYOZ3     | MYOZ3     |
| hsa-miR-378* | - | NBPF14    | NBPF14    |
| hsa-miR-378* | - | NCKAP1L   | NCKAP1L   |
| hsa-miR-378* | - | NF1       | NF1       |
| hsa-miR-378* | - | NLRP12    | NLRP12    |
| hsa-miR-378* | - | NODAL     | NODAL     |
| hsa-miR-378* | - | NOL6      | NOL6      |
| hsa-miR-378* | - | NPAS2     | NPAS2     |
| hsa-miR-378* | - | NPHS1     | NPHS1     |
| hsa-miR-378* | - | OBFC2B    | OBFC2B    |
| hsa-miR-378* | - | OTOG      | OTOG      |
| hsa-miR-378* | - | P2RX7     | P2RX7     |
| hsa-miR-378* | - | PCDH11Y   | PCDH11Y   |
| hsa-miR-378* | - | PINK1     | PINK1     |

|              |   |          |          |
|--------------|---|----------|----------|
| hsa-miR-378* | - | PNLIPRP1 | PNLIPRP1 |
| hsa-miR-378* | - | PNPLA1   | PNPLA1   |
| hsa-miR-378* | - | POLK     | POLK     |
| hsa-miR-378* | - | PPAPDC1B | PPAPDC1B |
| hsa-miR-378* | - | PPARD    | PPARD    |
| hsa-miR-378* | - | PPM1K    | PPM1K    |
| hsa-miR-378* | - | PRPSAP1  | PRPSAP1  |
| hsa-miR-378* | - | PRR11    | PRR11    |
| hsa-miR-378* | - | PRR3     | PRR3     |
| hsa-miR-378* | - | PRRT3    | PRRT3    |
| hsa-miR-378* | - | PRSS8    | PRSS8    |
| hsa-miR-378* | - | PSMC3IP  | PSMC3IP  |
| hsa-miR-378* | - | PTPN23   | PTPN23   |
| hsa-miR-378* | - | PTPRN    | PTPRN    |
| hsa-miR-378* | - | PXMP2    | PXMP2    |
| hsa-miR-378* | - | RABEP2   | RABEP2   |
| hsa-miR-378* | - | RALGPS2  | RALGPS2  |
| hsa-miR-378* | - | RBP1     | RBP1     |
| hsa-miR-378* | - | RELA     | RELA     |
| hsa-miR-378* | - | REPS1    | REPS1    |
| hsa-miR-378* | - | RG9MTD3  | RG9MTD3  |
| hsa-miR-378* | - | RHEBL1   | RHEBL1   |
| hsa-miR-378* | - | RNF185   | RNF185   |
| hsa-miR-378* | - | RNF20    | RNF20    |
| hsa-miR-378* | - | RUNDC2A  | RUNDC2A  |
| hsa-miR-378* | - | SAMD4B   | SAMD4B   |
| hsa-miR-378* | - | SAMD7    | SAMD7    |
| hsa-miR-378* | - | SAMD9    | SAMD9    |
| hsa-miR-378* | - | SCARF1   | SCARF1   |
| hsa-miR-378* | - | SENP1    | SENP1    |
| hsa-miR-378* | - | SFI1     | SFI1     |
| hsa-miR-378* | - | SHANK3   | SHANK3   |
| hsa-miR-378* | - | SLAMF7   | SLAMF7   |
| hsa-miR-378* | - | SLC1A6   | SLC1A6   |
| hsa-miR-378* | - | SLC25A35 | SLC25A35 |
| hsa-miR-378* | - | SLC26A6  | SLC26A6  |
| hsa-miR-378* | - | SLC35B4  | SLC35B4  |
| hsa-miR-378* | - | SLC35E2  | SLC35E2  |
| hsa-miR-378* | - | SLC35F2  | SLC35F2  |
| hsa-miR-378* | - | SLC37A4  | SLC37A4  |
| hsa-miR-378* | - | SLC38A5  | SLC38A5  |
| hsa-miR-378* | - | SLC45A2  | SLC45A2  |
| hsa-miR-378* | - | SLC4A10  | SLC4A10  |
| hsa-miR-378* | - | SLC4A9   | SLC4A9   |
| hsa-miR-378* | - | SLC9A11  | SLC9A11  |
| hsa-miR-378* | - | SLMAP    | SLMAP    |
| hsa-miR-378* | - | SMARCB1  | SMARCB1  |
| hsa-miR-378* | - | SNX22    | SNX22    |
| hsa-miR-378* | - | STK11IP  | STK11IP  |
| hsa-miR-378* | - | SV2A     | SV2A     |
| hsa-miR-378* | - | TAF1A    | TAF1A    |

|              |          |           |           |
|--------------|----------|-----------|-----------|
| hsa-miR-378* | -        | TAS2R5    | TAS2R5    |
| hsa-miR-378* | -        | TMC8      | TMC8      |
| hsa-miR-378* | -        | TMEM111   | TMEM111   |
| hsa-miR-378* | -        | TMEM186   | TMEM186   |
| hsa-miR-378* | -        | TMEM39B   | TMEM39B   |
| hsa-miR-378* | -        | TMEM44    | TMEM44    |
| hsa-miR-378* | -        | TNFSF14   | TNFSF14   |
| hsa-miR-378* | -        | TNIP2     | TNIP2     |
| hsa-miR-378* | -        | TSPAN8    | TSPAN8    |
| hsa-miR-378* | -        | TSSC1     | TSSC1     |
| hsa-miR-378* | -        | TTF1      | TTF1      |
| hsa-miR-378* | -        | TUSC2     | TUSC2     |
| hsa-miR-378* | -        | USP54     | USP54     |
| hsa-miR-378* | -        | WBP2NL    | WBP2NL    |
| hsa-miR-378* | -        | WDR90     | WDR90     |
| hsa-miR-378* | -        | WIBG      | WIBG      |
| hsa-miR-378* | -        | XPO5      | XPO5      |
| hsa-miR-378* | -        | ZC3H10    | ZC3H10    |
| hsa-miR-378* | -        | ZNF101    | ZNF101    |
| hsa-miR-378* | -        | ZNF426    | ZNF426    |
| hsa-miR-378* | -        | ZNF429    | ZNF429    |
| hsa-miR-378* | -        | ZNF554    | ZNF554    |
| hsa-miR-378* | -        | ZNF556    | ZNF556    |
| hsa-miR-378* | -        | ZNF620    | ZNF620    |
| hsa-miR-378* | -        | ZNF691    | ZNF691    |
| hsa-miR-378* | -        | ZNF749    | ZNF749    |
| hsa-miR-378* | -        | ZNF768    | ZNF768    |
| hsa-miR-378* | -        | ZNF785    | ZNF785    |
| hsa-miR-379  | -        | ABCC2     | ABCC2     |
| hsa-miR-379  | -        | ACOX3     | ACOX3     |
| hsa-miR-379  | -        | ACP1      | ACP1      |
| hsa-miR-379  | -        | ACSS1     | ACSS1     |
| hsa-miR-379  | ADAMTS15 | -         | ADAMTS15  |
| hsa-miR-379  | -        | ADAMTS9   | ADAMTS9   |
| hsa-miR-379  | -        | AKR1C3    | AKR1C3    |
| hsa-miR-379  | -        | ANGEL2    | ANGEL2    |
| hsa-miR-379  | -        | ANKRD29   | ANKRD29   |
| hsa-miR-379  | -        | AP3S1     | AP3S1     |
| hsa-miR-379  | -        | APH1A     | APH1A     |
| hsa-miR-379  | -        | ARHGAP24  | ARHGAP24  |
| hsa-miR-379  | -        | ARHGEF19  | ARHGEF19  |
| hsa-miR-379  | -        | ARPC5L    | ARPC5L    |
| hsa-miR-379  | -        | ATP5F1    | ATP5F1    |
| hsa-miR-379  | -        | ATXN7L1   | ATXN7L1   |
| hsa-miR-379  | -        | B4GALT3   | B4GALT3   |
| hsa-miR-379  | BAZ2B    | BAZ2B     | -         |
| hsa-miR-379  | -        | C12orf53  | C12orf53  |
| hsa-miR-379  | -        | C14orf115 | C14orf115 |
| hsa-miR-379  | -        | C18orf34  | C18orf34  |
| hsa-miR-379  | -        | C19orf59  | C19orf59  |
| hsa-miR-379  | -        | C1orf101  | C1orf101  |

|             |         |          |          |
|-------------|---------|----------|----------|
| hsa-miR-379 | -       | C1orf55  | C1orf55  |
| hsa-miR-379 | -       | C1orf91  | C1orf91  |
| hsa-miR-379 | C5orf51 | C5orf51  | -        |
| hsa-miR-379 | -       | C6orf167 | C6orf167 |
| hsa-miR-379 | -       | C7       | C7       |
| hsa-miR-379 | -       | CACNG3   | CACNG3   |
| hsa-miR-379 | -       | CALB2    | CALB2    |
| hsa-miR-379 | -       | CBWD1    | CBWD1    |
| hsa-miR-379 | -       | CCDC71   | CCDC71   |
| hsa-miR-379 | -       | CCDC91   | CCDC91   |
| hsa-miR-379 | -       | CCL2     | CCL2     |
| hsa-miR-379 | -       | CCRL1    | CCRL1    |
| hsa-miR-379 | -       | CD226    | CD226    |
| hsa-miR-379 | -       | CD9      | CD9      |
| hsa-miR-379 | -       | CDC37    | CDC37    |
| hsa-miR-379 | -       | CDCP2    | CDCP2    |
| hsa-miR-379 | -       | CDKL4    | CDKL4    |
| hsa-miR-379 | -       | CENPC1   | CENPC1   |
| hsa-miR-379 | -       | CFTR     | CFTR     |
| hsa-miR-379 | -       | CHRNA7   | CHRNA7   |
| hsa-miR-379 | -       | CHST14   | CHST14   |
| hsa-miR-379 | -       | CIRH1A   | CIRH1A   |
| hsa-miR-379 | -       | CTF1     | CTF1     |
| hsa-miR-379 | -       | CTSL1    | CTSL1    |
| hsa-miR-379 | -       | CUTC     | CUTC     |
| hsa-miR-379 | -       | CYP2U1   | CYP2U1   |
| hsa-miR-379 | -       | CYP4A11  | CYP4A11  |
| hsa-miR-379 | DCP1A   | DCP1A    | -        |
| hsa-miR-379 | DDX52   | DDX52    | -        |
| hsa-miR-379 | -       | DHRS4    | DHRS4    |
| hsa-miR-379 | -       | DHRS4L2  | DHRS4L2  |
| hsa-miR-379 | DNAJC30 | DNAJC30  | -        |
| hsa-miR-379 | -       | DNASE2   | DNASE2   |
| hsa-miR-379 | -       | DNM3     | DNM3     |
| hsa-miR-379 | -       | DNMT3B   | DNMT3B   |
| hsa-miR-379 | -       | DUSP1    | DUSP1    |
| hsa-miR-379 | -       | DUSP16   | DUSP16   |
| hsa-miR-379 | -       | DYDC2    | DYDC2    |
| hsa-miR-379 | -       | E2F6     | E2F6     |
| hsa-miR-379 | EDEM3   | EDEM3    | -        |
| hsa-miR-379 | EDN1    | EDN1     | -        |
| hsa-miR-379 | -       | EFTUD2   | EFTUD2   |
| hsa-miR-379 | -       | EHD4     | EHD4     |
| hsa-miR-379 | EHMT1   | EHMT1    | -        |
| hsa-miR-379 | ELMOD2  | ELMOD2   | -        |
| hsa-miR-379 | -       | EMCN     | EMCN     |
| hsa-miR-379 | -       | FAM59B   | FAM59B   |
| hsa-miR-379 | -       | FCRL5    | FCRL5    |
| hsa-miR-379 | FIGNL2  | FIGNL2   | -        |
| hsa-miR-379 | FLT3LG  | FLT3LG   | -        |
| hsa-miR-379 | FOXF2   | FOXF2    | -        |



|             |           |           |           |
|-------------|-----------|-----------|-----------|
| hsa-miR-379 | FOXP2     | FOXP2     | -         |
| hsa-miR-379 | -         | FRY       | FRY       |
| hsa-miR-379 | -         | FSHB      | FSHB      |
| hsa-miR-379 | -         | G0S2      | G0S2      |
| hsa-miR-379 | -         | GABRA3    | GABRA3    |
| hsa-miR-379 | -         | GABRB1    | GABRB1    |
| hsa-miR-379 | -         | GALNTL2   | GALNTL2   |
| hsa-miR-379 | GDF6      | GDF6      | -         |
| hsa-miR-379 | -         | GFI1B     | GFI1B     |
| hsa-miR-379 | -         | GHRHR     | GHRHR     |
| hsa-miR-379 | -         | GKAP1     | GKAP1     |
| hsa-miR-379 | -         | GPSM2     | GPSM2     |
| hsa-miR-379 | -         | GPX3      | GPX3      |
| hsa-miR-379 | -         | GRM8      | GRM8      |
| hsa-miR-379 | -         | HBEGF     | HBEGF     |
| hsa-miR-379 | HECW2     | HECW2     | -         |
| hsa-miR-379 | -         | HELLS     | HELLS     |
| hsa-miR-379 | -         | HLA-E     | HLA-E     |
| hsa-miR-379 | HLCS      | HLCS      | -         |
| hsa-miR-379 | HOMER2    | HOMER2    | -         |
| hsa-miR-379 | -         | HSD11B1L  | HSD11B1L  |
| hsa-miR-379 | -         | HSPA4L    | HSPA4L    |
| hsa-miR-379 | HSPA5     | HSPA5     | -         |
| hsa-miR-379 | HTR1D     | -         | HTR1D     |
| hsa-miR-379 | HTR2C     | HTR2C     | -         |
| hsa-miR-379 | -         | IFNAR2    | IFNAR2    |
| hsa-miR-379 | -         | IL18BP    | IL18BP    |
| hsa-miR-379 | -         | IL18RAP   | IL18RAP   |
| hsa-miR-379 | -         | INMT      | INMT      |
| hsa-miR-379 | INSR      | INSR      | -         |
| hsa-miR-379 | -         | KBTBD5    | KBTBD5    |
| hsa-miR-379 | -         | KCNA5     | KCNA5     |
| hsa-miR-379 | -         | KCNJ1     | KCNJ1     |
| hsa-miR-379 | -         | KCNK2     | KCNK2     |
| hsa-miR-379 | -         | KCTD6     | KCTD6     |
| hsa-miR-379 | KIAA0895L | KIAA0895L | -         |
| hsa-miR-379 | -         | KIAA1143  | KIAA1143  |
| hsa-miR-379 | -         | KIAA1324L | KIAA1324L |
| hsa-miR-379 | -         | KLF11     | KLF11     |
| hsa-miR-379 | -         | KLHL17    | KLHL17    |
| hsa-miR-379 | -         | KLHL32    | KLHL32    |
| hsa-miR-379 | -         | L3MBTL    | L3MBTL    |
| hsa-miR-379 | -         | LEMD1     | LEMD1     |
| hsa-miR-379 | LIN28B    | LIN28B    | -         |
| hsa-miR-379 | LINGO2    | LINGO2    | -         |
| hsa-miR-379 | LPGAT1    | LPGAT1    | -         |
| hsa-miR-379 | LPHN3     | LPHN3     | -         |
| hsa-miR-379 | MACF1     | MACF1     | -         |
| hsa-miR-379 | -         | MAGED1    | MAGED1    |
| hsa-miR-379 | MAP3K1    | MAP3K1    | -         |
| hsa-miR-379 | MAP3K2    | MAP3K2    | -         |

|             |           |           |          |
|-------------|-----------|-----------|----------|
| hsa-miR-379 | -         | MAST4     | MAST4    |
| hsa-miR-379 | -         | MCTP2     | MCTP2    |
| hsa-miR-379 | -         | MITD1     | MITD1    |
| hsa-miR-379 | -         | MON1B     | MON1B    |
| hsa-miR-379 | -         | MRPS18B   | MRPS18B  |
| hsa-miR-379 | -         | MRPS18C   | MRPS18C  |
| hsa-miR-379 | -         | MS4A12    | MS4A12   |
| hsa-miR-379 | MTMR2     | MTMR2     | -        |
| hsa-miR-379 | -         | MTO1      | MTO1     |
| hsa-miR-379 | -         | MYL1      | MYL1     |
| hsa-miR-379 | MYO10     | MYO10     | -        |
| hsa-miR-379 | -         | MYO7A     | MYO7A    |
| hsa-miR-379 | -         | NAGS      | NAGS     |
| hsa-miR-379 | NFIA      | NFIA      | -        |
| hsa-miR-379 | -         | OGG1      | OGG1     |
| hsa-miR-379 | -         | OGN       | OGN      |
| hsa-miR-379 | OLFM3     | OLFM3     | -        |
| hsa-miR-379 | -         | PABPN1    | PABPN1   |
| hsa-miR-379 | -         | PARP1     | PARP1    |
| hsa-miR-379 | PCDH17    | PCDH17    | -        |
| hsa-miR-379 | PCGF3     | PCGF3     | -        |
| hsa-miR-379 | -         | PDE1C     | PDE1C    |
| hsa-miR-379 | PDE2A     | PDE2A     | -        |
| hsa-miR-379 | PDK1      | PDK1      | -        |
| hsa-miR-379 | -         | PEX11B    | PEX11B   |
| hsa-miR-379 | -         | PGS1      | PGS1     |
| hsa-miR-379 | -         | PHF12     | PHF12    |
| hsa-miR-379 | -         | PIGG      | PIGG     |
| hsa-miR-379 | PITPNM3   | PITPNM3   | -        |
| hsa-miR-379 | -         | PMCHL1    | PMCHL1   |
| hsa-miR-379 | -         | PON2      | PON2     |
| hsa-miR-379 | -         | PPP4R1    | PPP4R1   |
| hsa-miR-379 | -         | PREB      | PREB     |
| hsa-miR-379 | -         | PRELID1   | PRELID1  |
| hsa-miR-379 | -         | PROP1     | PROP1    |
| hsa-miR-379 | -         | PRPF38B   | PRPF38B  |
| hsa-miR-379 | -         | PRR4      | PRR4     |
| hsa-miR-379 | -         | PTK2      | PTK2     |
| hsa-miR-379 | ProSAPiP1 | ProSAPiP1 | -        |
| hsa-miR-379 | -         | RAB30     | RAB30    |
| hsa-miR-379 | RAB39B    | RAB39B    | -        |
| hsa-miR-379 | -         | RABGAP1L  | RABGAP1L |
| hsa-miR-379 | -         | RABGGTB   | RABGGTB  |
| hsa-miR-379 | RAPGEF5   | RAPGEF5   | -        |
| hsa-miR-379 | -         | RARB      | RARB     |
| hsa-miR-379 | -         | RASSF4    | RASSF4   |
| hsa-miR-379 | -         | RBM12B    | RBM12B   |
| hsa-miR-379 | -         | RBP1      | RBP1     |
| hsa-miR-379 | -         | RIBC1     | RIBC1    |
| hsa-miR-379 | -         | RIOK2     | RIOK2    |
| hsa-miR-379 | -         | RNF32     | RNF32    |

|             |         |         |         |
|-------------|---------|---------|---------|
| hsa-miR-379 | -       | RNF6    | RNF6    |
| hsa-miR-379 | -       | RNMT    | RNMT    |
| hsa-miR-379 | -       | RPL7    | RPL7    |
| hsa-miR-379 | -       | RWDD3   | RWDD3   |
| hsa-miR-379 | -       | SAFB2   | SAFB2   |
| hsa-miR-379 | SCRT1   | SCRT1   | -       |
| hsa-miR-379 | -       | SFRS11  | SFRS11  |
| hsa-miR-379 | SH3GLB1 | SH3GLB1 | -       |
| hsa-miR-379 | -       | SIN3A   | SIN3A   |
| hsa-miR-379 | -       | SIT1    | SIT1    |
| hsa-miR-379 | SLC19A2 | SLC19A2 | -       |
| hsa-miR-379 | -       | SLC5A11 | SLC5A11 |
| hsa-miR-379 | -       | SLC5A6  | SLC5A6  |
| hsa-miR-379 | -       | SLC6A16 | SLC6A16 |
| hsa-miR-379 | -       | SLMAP   | SLMAP   |
| hsa-miR-379 | -       | SMAP1   | SMAP1   |
| hsa-miR-379 | -       | SOCS3   | SOCS3   |
| hsa-miR-379 | -       | SON     | SON     |
| hsa-miR-379 | -       | SRPK2   | SRPK2   |
| hsa-miR-379 | -       | STAM2   | STAM2   |
| hsa-miR-379 | -       | SVOPL   | SVOPL   |
| hsa-miR-379 | -       | TBC1D8  | TBC1D8  |
| hsa-miR-379 | -       | TEX2    | TEX2    |
| hsa-miR-379 | -       | THAP11  | THAP11  |
| hsa-miR-379 | -       | TIMM17B | TIMM17B |
| hsa-miR-379 | -       | TMC7    | TMC7    |
| hsa-miR-379 | -       | TMEM165 | TMEM165 |
| hsa-miR-379 | -       | TOMM70A | TOMM70A |
| hsa-miR-379 | -       | TRIM4   | TRIM4   |
| hsa-miR-379 | -       | TUBAL3  | TUBAL3  |
| hsa-miR-379 | -       | TUBGCP5 | TUBGCP5 |
| hsa-miR-379 | TXLNG   | TXLNG   | -       |
| hsa-miR-379 | -       | TXNDC6  | TXNDC6  |
| hsa-miR-379 | UBE2E3  | UBE2E3  | -       |
| hsa-miR-379 | UBE2Q1  | UBE2Q1  | -       |
| hsa-miR-379 | -       | UGT2B10 | UGT2B10 |
| hsa-miR-379 | -       | VPS8    | VPS8    |
| hsa-miR-379 | WASL    | WASL    | -       |
| hsa-miR-379 | -       | XPO1    | XPO1    |
| hsa-miR-379 | -       | XRCC6   | XRCC6   |
| hsa-miR-379 | -       | ZBP1    | ZBP1    |
| hsa-miR-379 | -       | ZCCHC11 | ZCCHC11 |
| hsa-miR-379 | ZCCHC3  | ZCCHC3  | -       |
| hsa-miR-379 | -       | ZDHC11  | ZDHC11  |
| hsa-miR-379 | -       | ZMAT2   | ZMAT2   |
| hsa-miR-379 | -       | ZNF131  | ZNF131  |
| hsa-miR-379 | -       | ZNF236  | ZNF236  |
| hsa-miR-379 | -       | ZNF579  | ZNF579  |
| hsa-miR-379 | -       | ZNF582  | ZNF582  |
| hsa-miR-379 | -       | ZNF606  | ZNF606  |
| hsa-miR-382 | -       | ABCA1   | ABCA1   |

|             |          |          |          |
|-------------|----------|----------|----------|
| hsa-miR-382 | ABCB10   | ABCB10   | -        |
| hsa-miR-382 | -        | ACTA1    | ACTA1    |
| hsa-miR-382 | -        | ADAM7    | ADAM7    |
| hsa-miR-382 | -        | ADAMTS18 | ADAMTS18 |
| hsa-miR-382 | -        | ADAMTS6  | ADAMTS6  |
| hsa-miR-382 | AEBP2    | AEBP2    | -        |
| hsa-miR-382 | -        | AHSG     | AHSG     |
| hsa-miR-382 | -        | ALG13    | ALG13    |
| hsa-miR-382 | AMOTL2   | AMOTL2   | -        |
| hsa-miR-382 | -        | ANGPTL1  | ANGPTL1  |
| hsa-miR-382 | -        | ANKRD42  | ANKRD42  |
| hsa-miR-382 | -        | ANKRD5   | ANKRD5   |
| hsa-miR-382 | ANKS1A   | ANKS1A   | -        |
| hsa-miR-382 | -        | ANUBL1   | ANUBL1   |
| hsa-miR-382 | -        | APCDD1   | APCDD1   |
| hsa-miR-382 | ARFGEF1  | ARFGEF1  | -        |
| hsa-miR-382 | ARHGEF7  | ARHGEF7  | -        |
| hsa-miR-382 | ARID1B   | ARID1B   | -        |
| hsa-miR-382 | ARL5B    | ARL5B    | -        |
| hsa-miR-382 | -        | ASPM     | ASPM     |
| hsa-miR-382 | -        | ATP5C1   | ATP5C1   |
| hsa-miR-382 | -        | ATP6AP2  | ATP6AP2  |
| hsa-miR-382 | ATP8B1   | ATP8B1   | -        |
| hsa-miR-382 | B3GALNT2 | B3GALNT2 | -        |
| hsa-miR-382 | -        | B3GNT8   | B3GNT8   |
| hsa-miR-382 | BAGE2    | BAGE2    | -        |
| hsa-miR-382 | BAGE5    | BAGE5    | -        |
| hsa-miR-382 | -        | BCAR3    | BCAR3    |
| hsa-miR-382 | -        | BCAS2    | BCAS2    |
| hsa-miR-382 | -        | BCL2A1   | BCL2A1   |
| hsa-miR-382 | BCORL1   | BCORL1   | -        |
| hsa-miR-382 | BDNF     | BDNF     | -        |
| hsa-miR-382 | -        | BEST3    | BEST3    |
| hsa-miR-382 | -        | BMP3     | BMP3     |
| hsa-miR-382 | -        | BPIL1    | BPIL1    |
| hsa-miR-382 | BTBD3    | BTBD3    | -        |
| hsa-miR-382 | BTBD7    | BTBD7    | -        |
| hsa-miR-382 | -        | C12orf28 | C12orf28 |
| hsa-miR-382 | C13orf36 | C13orf36 | -        |
| hsa-miR-382 | -        | C14orf37 | C14orf37 |
| hsa-miR-382 | -        | C14orf45 | C14orf45 |
| hsa-miR-382 | -        | C17orf71 | C17orf71 |
| hsa-miR-382 | C17orf87 | C17orf87 | -        |
| hsa-miR-382 | -        | C18orf21 | C18orf21 |
| hsa-miR-382 | -        | C18orf34 | C18orf34 |
| hsa-miR-382 | -        | C1QL4    | C1QL4    |
| hsa-miR-382 | -        | C1orf103 | C1orf103 |
| hsa-miR-382 | -        | C1orf129 | C1orf129 |
| hsa-miR-382 | -        | C1orf186 | C1orf186 |
| hsa-miR-382 | -        | C21orf99 | C21orf99 |
| hsa-miR-382 | -        | C22orf31 | C22orf31 |

|             |         |          |          |
|-------------|---------|----------|----------|
| hsa-miR-382 | -       | C2orf42  | C2orf42  |
| hsa-miR-382 | -       | C2orf43  | C2orf43  |
| hsa-miR-382 | C2orf73 | C2orf73  | -        |
| hsa-miR-382 | -       | C3orf27  | C3orf27  |
| hsa-miR-382 | C3orf58 | C3orf58  | -        |
| hsa-miR-382 | -       | C6orf192 | C6orf192 |
| hsa-miR-382 | -       | C6orf48  | C6orf48  |
| hsa-miR-382 | -       | CALCA    | CALCA    |
| hsa-miR-382 | -       | CAMTA1   | CAMTA1   |
| hsa-miR-382 | CASKIN1 | CASKIN1  | -        |
| hsa-miR-382 | CASP3   | CASP3    | -        |
| hsa-miR-382 | -       | CBLN3    | CBLN3    |
| hsa-miR-382 | -       | CBWD1    | CBWD1    |
| hsa-miR-382 | -       | CBWD2    | CBWD2    |
| hsa-miR-382 | -       | CBWD3    | CBWD3    |
| hsa-miR-382 | -       | CBWD5    | CBWD5    |
| hsa-miR-382 | -       | CBWD6    | CBWD6    |
| hsa-miR-382 | -       | CBX3     | CBX3     |
| hsa-miR-382 | -       | CCDC132  | CCDC132  |
| hsa-miR-382 | -       | CD163L1  | CD163L1  |
| hsa-miR-382 | -       | CD37     | CD37     |
| hsa-miR-382 | -       | CDC40    | CDC40    |
| hsa-miR-382 | -       | CDH1     | CDH1     |
| hsa-miR-382 | CDK13   | CDK13    | -        |
| hsa-miR-382 | -       | CDKL4    | CDKL4    |
| hsa-miR-382 | CDV3    | CDV3     | -        |
| hsa-miR-382 | -       | CENPI    | CENPI    |
| hsa-miR-382 | -       | CHD1L    | CHD1L    |
| hsa-miR-382 | -       | CHD3     | CHD3     |
| hsa-miR-382 | -       | CHGA     | CHGA     |
| hsa-miR-382 | -       | CLEC2D   | CLEC2D   |
| hsa-miR-382 | -       | CLTCL1   | CLTCL1   |
| hsa-miR-382 | -       | CRH      | CRH      |
| hsa-miR-382 | -       | CRHBP    | CRHBP    |
| hsa-miR-382 | -       | CRISP3   | CRISP3   |
| hsa-miR-382 | CT62    | CT62     | -        |
| hsa-miR-382 | -       | CTSA     | CTSA     |
| hsa-miR-382 | -       | DAD1     | DAD1     |
| hsa-miR-382 | DCAF10  | DCAF10   | -        |
| hsa-miR-382 | DCAF12  | DCAF12   | -        |
| hsa-miR-382 | DDX3X   | DDX3X    | -        |
| hsa-miR-382 | -       | DGAT2L6  | DGAT2L6  |
| hsa-miR-382 | -       | DHRS4    | DHRS4    |
| hsa-miR-382 | -       | DHRS4L2  | DHRS4L2  |
| hsa-miR-382 | DHX15   | DHX15    | -        |
| hsa-miR-382 | DICER1  | DICER1   | -        |
| hsa-miR-382 | DLX3    | DLX3     | -        |
| hsa-miR-382 | -       | DRD1     | DRD1     |
| hsa-miR-382 | -       | DSG1     | DSG1     |
| hsa-miR-382 | -       | DYNLRB2  | DYNLRB2  |
| hsa-miR-382 | DYRK2   | DYRK2    | -        |

|             |         |           |           |
|-------------|---------|-----------|-----------|
| hsa-miR-382 | -       | EEF2K     | EEF2K     |
| hsa-miR-382 | -       | EFCAB3    | EFCAB3    |
| hsa-miR-382 | -       | EFNA5     | EFNA5     |
| hsa-miR-382 | -       | EGLN1     | EGLN1     |
| hsa-miR-382 | -       | EIF4ENIF1 | EIF4ENIF1 |
| hsa-miR-382 | -       | EIF4G3    | EIF4G3    |
| hsa-miR-382 | EIF5A2  | EIF5A2    | -         |
| hsa-miR-382 | -       | ELTD1     | ELTD1     |
| hsa-miR-382 | -       | EMILIN3   | EMILIN3   |
| hsa-miR-382 | EN2     | EN2       | -         |
| hsa-miR-382 | ENKUR   | ENKUR     | -         |
| hsa-miR-382 | -       | ENOSF1    | ENOSF1    |
| hsa-miR-382 | EPB41L3 | EPB41L3   | -         |
| hsa-miR-382 | EPC2    | EPC2      | -         |
| hsa-miR-382 | -       | EPRS      | EPRS      |
| hsa-miR-382 | -       | EZH2      | EZH2      |
| hsa-miR-382 | -       | F5        | F5        |
| hsa-miR-382 | FAM104A | FAM104A   | -         |
| hsa-miR-382 | -       | FAM108C1  | FAM108C1  |
| hsa-miR-382 | -       | FAM110B   | FAM110B   |
| hsa-miR-382 | -       | FAM114A1  | FAM114A1  |
| hsa-miR-382 | FAM120A | FAM120A   | -         |
| hsa-miR-382 | FAM168B | FAM168B   | -         |
| hsa-miR-382 | FAM45A  | FAM45A    | -         |
| hsa-miR-382 | -       | FAM47A    | FAM47A    |
| hsa-miR-382 | -       | FAM47B    | FAM47B    |
| hsa-miR-382 | -       | FAM59B    | FAM59B    |
| hsa-miR-382 | FAM84B  | FAM84B    | -         |
| hsa-miR-382 | -       | FAM92A1   | FAM92A1   |
| hsa-miR-382 | -       | FAM9A     | FAM9A     |
| hsa-miR-382 | -       | FAM9B     | FAM9B     |
| hsa-miR-382 | FBN1    | FBN1      | -         |
| hsa-miR-382 | -       | FBXL3     | FBXL3     |
| hsa-miR-382 | FBXO28  | FBXO28    | -         |
| hsa-miR-382 | -       | FBXO3     | FBXO3     |
| hsa-miR-382 | -       | FHIT      | FHIT      |
| hsa-miR-382 | -       | FOXF1     | FOXF1     |
| hsa-miR-382 | FOXN2   | FOXN2     | -         |
| hsa-miR-382 | -       | FUNDC1    | FUNDC1    |
| hsa-miR-382 | -       | FUT11     | FUT11     |
| hsa-miR-382 | -       | GABRA5    | GABRA5    |
| hsa-miR-382 | GALNT13 | GALNT13   | -         |
| hsa-miR-382 | -       | GATA2     | GATA2     |
| hsa-miR-382 | -       | GBP7      | GBP7      |
| hsa-miR-382 | -       | GDI2      | GDI2      |
| hsa-miR-382 | GFPT1   | GFPT1     | -         |
| hsa-miR-382 | -       | GLO1      | GLO1      |
| hsa-miR-382 | GM2A    | GM2A      | -         |
| hsa-miR-382 | -       | GPR110    | GPR110    |
| hsa-miR-382 | GPR115  | GPR115    | -         |
| hsa-miR-382 | -       | GPR137B   | GPR137B   |

|             |          |          |          |
|-------------|----------|----------|----------|
| hsa-miR-382 | GPR155   | GPR155   | -        |
| hsa-miR-382 | -        | GRK5     | GRK5     |
| hsa-miR-382 | -        | HAO1     | HAO1     |
| hsa-miR-382 | -        | HEATR2   | HEATR2   |
| hsa-miR-382 | -        | HHIP     | HHIP     |
| hsa-miR-382 | HIATL1   | HIATL1   | -        |
| hsa-miR-382 | -        | HMG3     | HMG3     |
| hsa-miR-382 | -        | HNF4A    | HNF4A    |
| hsa-miR-382 | HNRNP    | HNRNP    | -        |
| hsa-miR-382 | -        | HPS4     | HPS4     |
| hsa-miR-382 | HS3ST3B1 | HS3ST3B1 | -        |
| hsa-miR-382 | -        | HSPD1    | HSPD1    |
| hsa-miR-382 | -        | HTR1E    | HTR1E    |
| hsa-miR-382 | -        | HTR3C    | HTR3C    |
| hsa-miR-382 | -        | HTR4     | HTR4     |
| hsa-miR-382 | -        | IFI16    | IFI16    |
| hsa-miR-382 | -        | IFNG     | IFNG     |
| hsa-miR-382 | IGFBP5   | IGFBP5   | -        |
| hsa-miR-382 | -        | IL17RB   | IL17RB   |
| hsa-miR-382 | IL6ST    | IL6ST    | -        |
| hsa-miR-382 | -        | IMMT     | IMMT     |
| hsa-miR-382 | IPO5     | IPO5     | -        |
| hsa-miR-382 | -        | IPPK     | IPPK     |
| hsa-miR-382 | -        | IRX3     | IRX3     |
| hsa-miR-382 | -        | ITGA5    | ITGA5    |
| hsa-miR-382 | -        | ITGAD    | ITGAD    |
| hsa-miR-382 | -        | ITLN1    | ITLN1    |
| hsa-miR-382 | -        | ITM2A    | ITM2A    |
| hsa-miR-382 | -        | KCNV1    | KCNV1    |
| hsa-miR-382 | KIAA0232 | KIAA0232 | -        |
| hsa-miR-382 | -        | KIAA1012 | KIAA1012 |
| hsa-miR-382 | -        | KIAA1632 | KIAA1632 |
| hsa-miR-382 | -        | KIF13A   | KIF13A   |
| hsa-miR-382 | KLHDC5   | KLHDC5   | -        |
| hsa-miR-382 | -        | KLHDC7B  | KLHDC7B  |
| hsa-miR-382 | -        | KLHL5    | KLHL5    |
| hsa-miR-382 | -        | KLHL7    | KLHL7    |
| hsa-miR-382 | -        | KRT10    | KRT10    |
| hsa-miR-382 | -        | KRT24    | KRT24    |
| hsa-miR-382 | -        | KRT6A    | KRT6A    |
| hsa-miR-382 | -        | KRT74    | KRT74    |
| hsa-miR-382 | -        | KYNU     | KYNU     |
| hsa-miR-382 | LAMP3    | LAMP3    | -        |
| hsa-miR-382 | -        | LGR5     | LGR5     |
| hsa-miR-382 | LHFPL3   | LHFPL3   | -        |
| hsa-miR-382 | -        | LHX2     | LHX2     |
| hsa-miR-382 | -        | LHX8     | LHX8     |
| hsa-miR-382 | LIMD2    | LIMD2    | -        |
| hsa-miR-382 | LIN7C    | LIN7C    | -        |
| hsa-miR-382 | LIN9     | LIN9     | -        |
| hsa-miR-382 | -        | LMCD1    | LMCD1    |

|             |          |          |        |
|-------------|----------|----------|--------|
| hsa-miR-382 | LMX1A    | LMX1A    | -      |
| hsa-miR-382 | LPP      | LPP      | -      |
| hsa-miR-382 | -        | LPXN     | LPXN   |
| hsa-miR-382 | -        | LRRC8D   | LRRC8D |
| hsa-miR-382 | -        | LRRK2    | LRRK2  |
| hsa-miR-382 | -        | LRRN3    | LRRN3  |
| hsa-miR-382 | -        | LSM3     | LSM3   |
| hsa-miR-382 | -        | LYST     | LYST   |
| hsa-miR-382 | -        | MATN2    | MATN2  |
| hsa-miR-382 | -        | MATN3    | MATN3  |
| hsa-miR-382 | MBNL1    | MBNL1    | -      |
| hsa-miR-382 | -        | MEGF11   | MEGF11 |
| hsa-miR-382 | MEST     | MEST     | -      |
| hsa-miR-382 | -        | METAP2   | METAP2 |
| hsa-miR-382 | MIA3     | MIA3     | -      |
| hsa-miR-382 | -        | MIER1    | MIER1  |
| hsa-miR-382 | -        | MINA     | MINA   |
| hsa-miR-382 | -        | MLF2     | MLF2   |
| hsa-miR-382 | -        | MLL5     | MLL5   |
| hsa-miR-382 | MMP16    | MMP16    | -      |
| hsa-miR-382 | -        | MNDA     | MNDA   |
| hsa-miR-382 | MORF4L2  | MORF4L2  | -      |
| hsa-miR-382 | -        | MPP4     | MPP4   |
| hsa-miR-382 | -        | MRPL11   | MRPL11 |
| hsa-miR-382 | -        | MSRB2    | MSRB2  |
| hsa-miR-382 | MTMR1    | MTMR1    | -      |
| hsa-miR-382 | MXD1     | MXD1     | -      |
| hsa-miR-382 | NAALADL2 | NAALADL2 | -      |
| hsa-miR-382 | NAB1     | NAB1     | -      |
| hsa-miR-382 | -        | NAT2     | NAT2   |
| hsa-miR-382 | NDFIP2   | NDFIP2   | -      |
| hsa-miR-382 | -        | NDRG2    | NDRG2  |
| hsa-miR-382 | -        | NECAP2   | NECAP2 |
| hsa-miR-382 | NEGR1    | NEGR1    | -      |
| hsa-miR-382 | -        | NEK5     | NEK5   |
| hsa-miR-382 | NEURL1B  | NEURL1B  | -      |
| hsa-miR-382 | -        | NFE2L2   | NFE2L2 |
| hsa-miR-382 | NFIA     | -        | NFIA   |
| hsa-miR-382 | NFIB     | NFIB     | -      |
| hsa-miR-382 | -        | NGRN     | NGRN   |
| hsa-miR-382 | NLK      | NLK      | -      |
| hsa-miR-382 | -        | NPM1     | NPM1   |
| hsa-miR-382 | -        | NR1H4    | NR1H4  |
| hsa-miR-382 | NRK      | NRK      | -      |
| hsa-miR-382 | NT5C2    | NT5C2    | -      |
| hsa-miR-382 | -        | NT5DC4   | NT5DC4 |
| hsa-miR-382 | -        | NUDT9    | NUDT9  |
| hsa-miR-382 | -        | OCM      | OCM    |
| hsa-miR-382 | OGDH     | OGDH     | -      |
| hsa-miR-382 | OLA1     | OLA1     | -      |
| hsa-miR-382 | -        | OR11A1   | OR11A1 |



|             |         |         |         |
|-------------|---------|---------|---------|
| hsa-miR-382 | OST4    | OST4    | -       |
| hsa-miR-382 | -       | PACSIN2 | PACSIN2 |
| hsa-miR-382 | -       | PAIP1   | PAIP1   |
| hsa-miR-382 | PAPOLG  | PAPOLG  | -       |
| hsa-miR-382 | -       | PCBP1   | PCBP1   |
| hsa-miR-382 | -       | PCCB    | PCCB    |
| hsa-miR-382 | -       | PCDH9   | PCDH9   |
| hsa-miR-382 | -       | PCNT    | PCNT    |
| hsa-miR-382 | PDE1C   | PDE1C   | -       |
| hsa-miR-382 | PDE5A   | PDE5A   | -       |
| hsa-miR-382 | -       | PDHB    | PDHB    |
| hsa-miR-382 | PDPK1   | PDPK1   | -       |
| hsa-miR-382 | -       | PGGT1B  | PGGT1B  |
| hsa-miR-382 | -       | PHF20L1 | PHF20L1 |
| hsa-miR-382 | -       | PIGG    | PIGG    |
| hsa-miR-382 | -       | PIWIL4  | PIWIL4  |
| hsa-miR-382 | -       | PLAC1   | PLAC1   |
| hsa-miR-382 | -       | PLCB4   | PLCB4   |
| hsa-miR-382 | -       | PLCG2   | PLCG2   |
| hsa-miR-382 | PLCH1   | PLCH1   | -       |
| hsa-miR-382 | PLEKHA1 | PLEKHA1 | -       |
| hsa-miR-382 | -       | PLK4    | PLK4    |
| hsa-miR-382 | -       | PLOD2   | PLOD2   |
| hsa-miR-382 | -       | PNPT1   | PNPT1   |
| hsa-miR-382 | -       | PNRC1   | PNRC1   |
| hsa-miR-382 | -       | POLA2   | POLA2   |
| hsa-miR-382 | -       | POT1    | POT1    |
| hsa-miR-382 | -       | PPP3CC  | PPP3CC  |
| hsa-miR-382 | -       | PRDM6   | PRDM6   |
| hsa-miR-382 | -       | PRKAA1  | PRKAA1  |
| hsa-miR-382 | -       | PRPF38B | PRPF38B |
| hsa-miR-382 | -       | PSPH    | PSPH    |
| hsa-miR-382 | -       | PSTK    | PSTK    |
| hsa-miR-382 | PTGFRN  | PTGFRN  | -       |
| hsa-miR-382 | -       | PTPLA   | PTPLA   |
| hsa-miR-382 | -       | PURB    | PURB    |
| hsa-miR-382 | -       | PXDNL   | PXDNL   |
| hsa-miR-382 | -       | QRICH1  | QRICH1  |
| hsa-miR-382 | RASGRF1 | RASGRF1 | -       |
| hsa-miR-382 | -       | RBM27   | RBM27   |
| hsa-miR-382 | -       | RBM3    | RBM3    |
| hsa-miR-382 | -       | RGN     | RGN     |
| hsa-miR-382 | RGS3    | -       | RGS3    |
| hsa-miR-382 | -       | RHCE    | RHCE    |
| hsa-miR-382 | -       | RHCG    | RHCG    |
| hsa-miR-382 | RNF19A  | RNF19A  | -       |
| hsa-miR-382 | -       | ROPN1L  | ROPN1L  |
| hsa-miR-382 | -       | RPAIN   | RPAIN   |
| hsa-miR-382 | -       | RPS6KA6 | RPS6KA6 |
| hsa-miR-382 | -       | RTN4IP1 | RTN4IP1 |
| hsa-miR-382 | -       | RTTN    | RTTN    |

|             |          |          |          |
|-------------|----------|----------|----------|
| hsa-miR-382 | -        | RUFY1    | RUFY1    |
| hsa-miR-382 | RUFY3    | RUFY3    | -        |
| hsa-miR-382 | RUNX1    | RUNX1    | -        |
| hsa-miR-382 | RUNX3    | RUNX3    | -        |
| hsa-miR-382 | -        | S100Z    | S100Z    |
| hsa-miR-382 | SCD      | SCD      | -        |
| hsa-miR-382 | -        | SCYL3    | SCYL3    |
| hsa-miR-382 | -        | SEMA3A   | SEMA3A   |
| hsa-miR-382 | SEPT3    | SEPT3    | -        |
| hsa-miR-382 | -        | SERPINB2 | SERPINB2 |
| hsa-miR-382 | SETD8    | SETD8    | -        |
| hsa-miR-382 | -        | SETDB2   | SETDB2   |
| hsa-miR-382 | SGK1     | SGK1     | -        |
| hsa-miR-382 | SHC4     | SHC4     | -        |
| hsa-miR-382 | SIRPA    | SIRPA    | -        |
| hsa-miR-382 | SKP1     | SKP1     | -        |
| hsa-miR-382 | SLAIN2   | SLAIN2   | -        |
| hsa-miR-382 | -        | SLC22A5  | SLC22A5  |
| hsa-miR-382 | SLC23A2  | SLC23A2  | -        |
| hsa-miR-382 | -        | SLC25A39 | SLC25A39 |
| hsa-miR-382 | -        | SLC26A3  | SLC26A3  |
| hsa-miR-382 | -        | SLC26A7  | SLC26A7  |
| hsa-miR-382 | -        | SLC35D2  | SLC35D2  |
| hsa-miR-382 | -        | SLC6A8   | SLC6A8   |
| hsa-miR-382 | -        | SLC7A13  | SLC7A13  |
| hsa-miR-382 | SLCO1A2  | SLCO1A2  | -        |
| hsa-miR-382 | -        | SLITRK2  | SLITRK2  |
| hsa-miR-382 | SMARCAD1 | SMARCAD1 | -        |
| hsa-miR-382 | -        | SMC3     | SMC3     |
| hsa-miR-382 | SNX13    | SNX13    | -        |
| hsa-miR-382 | -        | SNX7     | SNX7     |
| hsa-miR-382 | -        | SOD2     | SOD2     |
| hsa-miR-382 | SORCS3   | SORCS3   | -        |
| hsa-miR-382 | SORT1    | SORT1    | -        |
| hsa-miR-382 | -        | SOX17    | SOX17    |
| hsa-miR-382 | SPCS2    | SPCS2    | -        |
| hsa-miR-382 | SPCS3    | SPCS3    | -        |
| hsa-miR-382 | -        | SPIC     | SPIC     |
| hsa-miR-382 | SRGAP2   | SRGAP2   | -        |
| hsa-miR-382 | -        | SRRM2    | SRRM2    |
| hsa-miR-382 | SSR3     | SSR3     | -        |
| hsa-miR-382 | STAG2    | STAG2    | -        |
| hsa-miR-382 | -        | STAT4    | STAT4    |
| hsa-miR-382 | STK35    | STK35    | -        |
| hsa-miR-382 | STXBP4   | STXBP4   | -        |
| hsa-miR-382 | SYNC     | SYNC     | -        |
| hsa-miR-382 | SYNCRIP  | SYNCRIP  | -        |
| hsa-miR-382 | SYT1     | SYT1     | -        |
| hsa-miR-382 | SYT14    | SYT14    | -        |
| hsa-miR-382 | SYT4     | SYT4     | -        |
| hsa-miR-382 | -        | SYT5     | SYT5     |

|             |         |          |          |
|-------------|---------|----------|----------|
| hsa-miR-382 | -       | TAC4     | TAC4     |
| hsa-miR-382 | -       | TAZ      | TAZ      |
| hsa-miR-382 | -       | TBC1D19  | TBC1D19  |
| hsa-miR-382 | -       | TBCE     | TBCE     |
| hsa-miR-382 | -       | TCEAL4   | TCEAL4   |
| hsa-miR-382 | TCF7L2  | TCF7L2   | -        |
| hsa-miR-382 | -       | TCHP     | TCHP     |
| hsa-miR-382 | -       | TCP10L   | TCP10L   |
| hsa-miR-382 | -       | TCP11L2  | TCP11L2  |
| hsa-miR-382 | -       | TEX9     | TEX9     |
| hsa-miR-382 | THBD    | THBD     | -        |
| hsa-miR-382 | -       | TIMM17A  | TIMM17A  |
| hsa-miR-382 | -       | TMCO3    | TMCO3    |
| hsa-miR-382 | -       | TMEFF2   | TMEFF2   |
| hsa-miR-382 | TMEM131 | TMEM131  | -        |
| hsa-miR-382 | TMEM135 | TMEM135  | -        |
| hsa-miR-382 | TMEM136 | TMEM136  | -        |
| hsa-miR-382 | TMEM181 | TMEM181  | -        |
| hsa-miR-382 | -       | TMEM187  | TMEM187  |
| hsa-miR-382 | TMEM26  | TMEM26   | -        |
| hsa-miR-382 | TMEM48  | TMEM48   | -        |
| hsa-miR-382 | -       | TMEM95   | TMEM95   |
| hsa-miR-382 | -       | TMPRSS13 | TMPRSS13 |
| hsa-miR-382 | -       | TMTC4    | TMTC4    |
| hsa-miR-382 | -       | TNFRSF19 | TNFRSF19 |
| hsa-miR-382 | TNPO1   | TNPO1    | -        |
| hsa-miR-382 | -       | TPH1     | TPH1     |
| hsa-miR-382 | TPPP    | TPPP     | -        |
| hsa-miR-382 | -       | TREM2    | TREM2    |
| hsa-miR-382 | -       | TRIM9    | TRIM9    |
| hsa-miR-382 | -       | TTC12    | TTC12    |
| hsa-miR-382 | -       | TTC18    | TTC18    |
| hsa-miR-382 | TTC28   | TTC28    | -        |
| hsa-miR-382 | -       | TUSC3    | TUSC3    |
| hsa-miR-382 | UBE2G1  | UBE2G1   | -        |
| hsa-miR-382 | UBE2H   | UBE2H    | -        |
| hsa-miR-382 | UBTF    | UBTF     | -        |
| hsa-miR-382 | -       | UGT1A1   | UGT1A1   |
| hsa-miR-382 | -       | UGT2B15  | UGT2B15  |
| hsa-miR-382 | -       | UQCRB    | UQCRB    |
| hsa-miR-382 | VEZF1   | VEZF1    | -        |
| hsa-miR-382 | -       | VIM      | VIM      |
| hsa-miR-382 | -       | VIP      | VIP      |
| hsa-miR-382 | -       | VPS13A   | VPS13A   |
| hsa-miR-382 | -       | WDR5B    | WDR5B    |
| hsa-miR-382 | -       | WDR69    | WDR69    |
| hsa-miR-382 | WDTC1   | WDTC1    | -        |
| hsa-miR-382 | -       | WHSC2    | WHSC2    |
| hsa-miR-382 | XPR1    | XPR1     | -        |
| hsa-miR-382 | ZCCHC14 | ZCCHC14  | -        |
| hsa-miR-382 | -       | ZFP2     | ZFP2     |

|                |         |          |          |
|----------------|---------|----------|----------|
| hsa-miR-382    | -       | ZFP64    | ZFP64    |
| hsa-miR-382    | -       | ZFPL1    | ZFPL1    |
| hsa-miR-382    | -       | ZMYM2    | ZMYM2    |
| hsa-miR-382    | -       | ZMYM5    | ZMYM5    |
| hsa-miR-382    | ZNF197  | ZNF197   | -        |
| hsa-miR-382    | ZNF280C | ZNF280C  | -        |
| hsa-miR-382    | -       | ZNF283   | ZNF283   |
| hsa-miR-382    | -       | ZNF287   | ZNF287   |
| hsa-miR-382    | -       | ZNF322A  | ZNF322A  |
| hsa-miR-382    | -       | ZNF322B  | ZNF322B  |
| hsa-miR-382    | -       | ZNF354C  | ZNF354C  |
| hsa-miR-382    | -       | ZNF462   | ZNF462   |
| hsa-miR-382    | -       | ZNF599   | ZNF599   |
| hsa-miR-382    | -       | ZNF645   | ZNF645   |
| hsa-miR-382    | -       | ZNF646   | ZNF646   |
| hsa-miR-382    | -       | ZNF695   | ZNF695   |
| hsa-miR-382    | -       | ZNF792   | ZNF792   |
| hsa-miR-382    | ZNRF3   | ZNRF3    | -        |
| hsa-miR-409-3p | -       | AADAACL2 | AADAACL2 |
| hsa-miR-409-3p | -       | ABI3BP   | ABI3BP   |
| hsa-miR-409-3p | -       | ACOX2    | ACOX2    |
| hsa-miR-409-3p | -       | ACTR6    | ACTR6    |
| hsa-miR-409-3p | -       | ADA      | ADA      |
| hsa-miR-409-3p | -       | ADAMTS7  | ADAMTS7  |
| hsa-miR-409-3p | -       | ADPRHL1  | ADPRHL1  |
| hsa-miR-409-3p | -       | AFM      | AFM      |
| hsa-miR-409-3p | -       | AIF1     | AIF1     |
| hsa-miR-409-3p | -       | AKT1     | AKT1     |
| hsa-miR-409-3p | -       | ANG      | ANG      |
| hsa-miR-409-3p | -       | ANKAR    | ANKAR    |
| hsa-miR-409-3p | -       | AP3S1    | AP3S1    |
| hsa-miR-409-3p | -       | APOBEC2  | APOBEC2  |
| hsa-miR-409-3p | -       | APOC2    | APOC2    |
| hsa-miR-409-3p | -       | ARHGAP29 | ARHGAP29 |
| hsa-miR-409-3p | -       | ARL5A    | ARL5A    |
| hsa-miR-409-3p | -       | ARPC3    | ARPC3    |

|                |   |           |           |
|----------------|---|-----------|-----------|
| hsa-miR-409-3p | - | ASPA      | ASPA      |
| hsa-miR-409-3p | - | ATF7      | ATF7      |
| hsa-miR-409-3p | - | ATP13A3   | ATP13A3   |
| hsa-miR-409-3p | - | ATP13A4   | ATP13A4   |
| hsa-miR-409-3p | - | B4GALT2   | B4GALT2   |
| hsa-miR-409-3p | - | BCCIP     | BCCIP     |
| hsa-miR-409-3p | - | C11orf63  | C11orf63  |
| hsa-miR-409-3p | - | C11orf74  | C11orf74  |
| hsa-miR-409-3p | - | C12orf56  | C12orf56  |
| hsa-miR-409-3p | - | C14orf159 | C14orf159 |
| hsa-miR-409-3p | - | C18orf16  | C18orf16  |
| hsa-miR-409-3p | - | C18orf22  | C18orf22  |
| hsa-miR-409-3p | - | C19orf45  | C19orf45  |
| hsa-miR-409-3p | - | C1orf103  | C1orf103  |
| hsa-miR-409-3p | - | C1orf125  | C1orf125  |
| hsa-miR-409-3p | - | C1orf63   | C1orf63   |
| hsa-miR-409-3p | - | C5orf4    | C5orf4    |
| hsa-miR-409-3p | - | C6orf15   | C6orf15   |
| hsa-miR-409-3p | - | C7orf11   | C7orf11   |
| hsa-miR-409-3p | - | C8orf44   | C8orf44   |
| hsa-miR-409-3p | - | C9orf68   | C9orf68   |
| hsa-miR-409-3p | - | C9orf70   | C9orf70   |
| hsa-miR-409-3p | - | CABYR     | CABYR     |
| hsa-miR-409-3p | - | CACNB4    | CACNB4    |
| hsa-miR-409-3p | - | CADPS2    | CADPS2    |
| hsa-miR-409-3p | - | CALML4    | CALML4    |
| hsa-miR-409-3p | - | CAMSAP1   | CAMSAP1   |
| hsa-miR-409-3p | - | CAV1      | CAV1      |

|                |   |         |         |
|----------------|---|---------|---------|
| hsa-miR-409-3p | - | CBWD1   | CBWD1   |
| hsa-miR-409-3p | - | CBWD2   | CBWD2   |
| hsa-miR-409-3p | - | CBWD3   | CBWD3   |
| hsa-miR-409-3p | - | CBWD6   | CBWD6   |
| hsa-miR-409-3p | - | CCBL2   | CCBL2   |
| hsa-miR-409-3p | - | CCDC18  | CCDC18  |
| hsa-miR-409-3p | - | CCDC36  | CCDC36  |
| hsa-miR-409-3p | - | CCDC60  | CCDC60  |
| hsa-miR-409-3p | - | CCR7    | CCR7    |
| hsa-miR-409-3p | - | CCT4    | CCT4    |
| hsa-miR-409-3p | - | CD48    | CD48    |
| hsa-miR-409-3p | - | CDK7    | CDK7    |
| hsa-miR-409-3p | - | CHRNA5  | CHRNA5  |
| hsa-miR-409-3p | - | CHRNA6  | CHRNA6  |
| hsa-miR-409-3p | - | CLCA4   | CLCA4   |
| hsa-miR-409-3p | - | CLCC1   | CLCC1   |
| hsa-miR-409-3p | - | CLGN    | CLGN    |
| hsa-miR-409-3p | - | COCH    | COCH    |
| hsa-miR-409-3p | - | COL17A1 | COL17A1 |
| hsa-miR-409-3p | - | COL4A3  | COL4A3  |
| hsa-miR-409-3p | - | COMMD8  | COMMD8  |
| hsa-miR-409-3p | - | COQ4    | COQ4    |
| hsa-miR-409-3p | - | CRLS1   | CRLS1   |
| hsa-miR-409-3p | - | CRYZ    | CRYZ    |
| hsa-miR-409-3p | - | CSTA    | CSTA    |
| hsa-miR-409-3p | - | CTHRC1  | CTHRC1  |
| hsa-miR-409-3p | - | CTNNA2  | CTNNA2  |
| hsa-miR-409-3p | - | CTNND1  | CTNND1  |

|                |   |         |         |
|----------------|---|---------|---------|
| hsa-miR-409-3p | - | CWF19L1 | CWF19L1 |
| hsa-miR-409-3p | - | CXorf36 | CXorf36 |
| hsa-miR-409-3p | - | CYP19A1 | CYP19A1 |
| hsa-miR-409-3p | - | DAAM1   | DAAM1   |
| hsa-miR-409-3p | - | DARS2   | DARS2   |
| hsa-miR-409-3p | - | DAXX    | DAXX    |
| hsa-miR-409-3p | - | DCP1A   | DCP1A   |
| hsa-miR-409-3p | - | DCUN1D5 | DCUN1D5 |
| hsa-miR-409-3p | - | DDHD1   | DDHD1   |
| hsa-miR-409-3p | - | DDT     | DDT     |
| hsa-miR-409-3p | - | DDX4    | DDX4    |
| hsa-miR-409-3p | - | DENND2C | DENND2C |
| hsa-miR-409-3p | - | DEPDC6  | DEPDC6  |
| hsa-miR-409-3p | - | DHRS13  | DHRS13  |
| hsa-miR-409-3p | - | DIP2A   | DIP2A   |
| hsa-miR-409-3p | - | DNAJB6  | DNAJB6  |
| hsa-miR-409-3p | - | DNTT    | DNTT    |
| hsa-miR-409-3p | - | DOCK9   | DOCK9   |
| hsa-miR-409-3p | - | DTWD1   | DTWD1   |
| hsa-miR-409-3p | - | DUSP12  | DUSP12  |
| hsa-miR-409-3p | - | DYNC2H1 | DYNC2H1 |
| hsa-miR-409-3p | - | E2F5    | E2F5    |
| hsa-miR-409-3p | - | EBAG9   | EBAG9   |
| hsa-miR-409-3p | - | EFCAB2  | EFCAB2  |
| hsa-miR-409-3p | - | EGFL6   | EGFL6   |
| hsa-miR-409-3p | - | ENAM    | ENAM    |
| hsa-miR-409-3p | - | EPB41L2 | EPB41L2 |
| hsa-miR-409-3p | - | EPO     | EPO     |

|                |   |         |         |
|----------------|---|---------|---------|
| hsa-miR-409-3p | - | EWSR1   | EWSR1   |
| hsa-miR-409-3p | - | FABP4   | FABP4   |
| hsa-miR-409-3p | - | FAM5C   | FAM5C   |
| hsa-miR-409-3p | - | FAM96A  | FAM96A  |
| hsa-miR-409-3p | - | FANCL   | FANCL   |
| hsa-miR-409-3p | - | FCER1A  | FCER1A  |
| hsa-miR-409-3p | - | FER     | FER     |
| hsa-miR-409-3p | - | FGB     | FGB     |
| hsa-miR-409-3p | - | FGF3    | FGF3    |
| hsa-miR-409-3p | - | FKBP1A  | FKBP1A  |
| hsa-miR-409-3p | - | FOXI1   | FOXI1   |
| hsa-miR-409-3p | - | FOXP2   | FOXP2   |
| hsa-miR-409-3p | - | FRRS1   | FRRS1   |
| hsa-miR-409-3p | - | GABRA2  | GABRA2  |
| hsa-miR-409-3p | - | GALNT6  | GALNT6  |
| hsa-miR-409-3p | - | GBA3    | GBA3    |
| hsa-miR-409-3p | - | GBP5    | GBP5    |
| hsa-miR-409-3p | - | GCNT4   | GCNT4   |
| hsa-miR-409-3p | - | GJB2    | GJB2    |
| hsa-miR-409-3p | - | GLIS1   | GLIS1   |
| hsa-miR-409-3p | - | GLRB    | GLRB    |
| hsa-miR-409-3p | - | GNAS    | GNAS    |
| hsa-miR-409-3p | - | GORASP2 | GORASP2 |
| hsa-miR-409-3p | - | GPBP1   | GPBP1   |
| hsa-miR-409-3p | - | GPR112  | GPR112  |
| hsa-miR-409-3p | - | GPR12   | GPR12   |
| hsa-miR-409-3p | - | GRIA3   | GRIA3   |
| hsa-miR-409-3p | - | GSTM3   | GSTM3   |



|                |   |          |          |
|----------------|---|----------|----------|
| hsa-miR-409-3p | - | GUCA1C   | GUCA1C   |
| hsa-miR-409-3p | - | HABP2    | HABP2    |
| hsa-miR-409-3p | - | HERC1    | HERC1    |
| hsa-miR-409-3p | - | HLA-F    | HLA-F    |
| hsa-miR-409-3p | - | HOMER2   | HOMER2   |
| hsa-miR-409-3p | - | HSD11B1  | HSD11B1  |
| hsa-miR-409-3p | - | HSPA14   | HSPA14   |
| hsa-miR-409-3p | - | HTRA2    | HTRA2    |
| hsa-miR-409-3p | - | HVCN1    | HVCN1    |
| hsa-miR-409-3p | - | IFNA2    | IFNA2    |
| hsa-miR-409-3p | - | IL17A    | IL17A    |
| hsa-miR-409-3p | - | IL1F8    | IL1F8    |
| hsa-miR-409-3p | - | ILF2     | ILF2     |
| hsa-miR-409-3p | - | INTU     | INTU     |
| hsa-miR-409-3p | - | IQUB     | IQUB     |
| hsa-miR-409-3p | - | ISCA1    | ISCA1    |
| hsa-miR-409-3p | - | JHDM1D   | JHDM1D   |
| hsa-miR-409-3p | - | KCNJ14   | KCNJ14   |
| hsa-miR-409-3p | - | KCTD8    | KCTD8    |
| hsa-miR-409-3p | - | KDEL2    | KDEL2    |
| hsa-miR-409-3p | - | KIAA1009 | KIAA1009 |
| hsa-miR-409-3p | - | KIF27    | KIF27    |
| hsa-miR-409-3p | - | KLF4     | KLF4     |
| hsa-miR-409-3p | - | KLHL12   | KLHL12   |
| hsa-miR-409-3p | - | KLHL26   | KLHL26   |
| hsa-miR-409-3p | - | KLRD1    | KLRD1    |
| hsa-miR-409-3p | - | KRTAP1-5 | KRTAP1-5 |
| hsa-miR-409-3p | - | L3MBTL   | L3MBTL   |

|                |   |          |          |
|----------------|---|----------|----------|
| hsa-miR-409-3p | - | LHX2     | LHX2     |
| hsa-miR-409-3p | - | LMBRD1   | LMBRD1   |
| hsa-miR-409-3p | - | LMO4     | LMO4     |
| hsa-miR-409-3p | - | LNX1     | LNX1     |
| hsa-miR-409-3p | - | LRRC17   | LRRC17   |
| hsa-miR-409-3p | - | LRRC56   | LRRC56   |
| hsa-miR-409-3p | - | LSM1     | LSM1     |
| hsa-miR-409-3p | - | LYPD3    | LYPD3    |
| hsa-miR-409-3p | - | MAD2L1   | MAD2L1   |
| hsa-miR-409-3p | - | MAGEB18  | MAGEB18  |
| hsa-miR-409-3p | - | MAGEB6   | MAGEB6   |
| hsa-miR-409-3p | - | MARVELD2 | MARVELD2 |
| hsa-miR-409-3p | - | MBIP     | MBIP     |
| hsa-miR-409-3p | - | MED10    | MED10    |
| hsa-miR-409-3p | - | MLPH     | MLPH     |
| hsa-miR-409-3p | - | MLX      | MLX      |
| hsa-miR-409-3p | - | MPDZ     | MPDZ     |
| hsa-miR-409-3p | - | MRP63    | MRP63    |
| hsa-miR-409-3p | - | MSH6     | MSH6     |
| hsa-miR-409-3p | - | MTM1     | MTM1     |
| hsa-miR-409-3p | - | MTO1     | MTO1     |
| hsa-miR-409-3p | - | MYOT     | MYOT     |
| hsa-miR-409-3p | - | NDFIP2   | NDFIP2   |
| hsa-miR-409-3p | - | NDN      | NDN      |
| hsa-miR-409-3p | - | NIPBL    | NIPBL    |
| hsa-miR-409-3p | - | NKTR     | NKTR     |
| hsa-miR-409-3p | - | NKX2-4   | NKX2-4   |
| hsa-miR-409-3p | - | NME7     | NME7     |

|                |   |         |         |
|----------------|---|---------|---------|
| hsa-miR-409-3p | - | NOL8    | NOL8    |
| hsa-miR-409-3p | - | NPAS2   | NPAS2   |
| hsa-miR-409-3p | - | NPC2    | NPC2    |
| hsa-miR-409-3p | - | NPHS2   | NPHS2   |
| hsa-miR-409-3p | - | NPPB    | NPPB    |
| hsa-miR-409-3p | - | NR4A2   | NR4A2   |
| hsa-miR-409-3p | - | NSMCE4A | NSMCE4A |
| hsa-miR-409-3p | - | OLFML3  | OLFML3  |
| hsa-miR-409-3p | - | PAM     | PAM     |
| hsa-miR-409-3p | - | PCCA    | PCCA    |
| hsa-miR-409-3p | - | PCDH11Y | PCDH11Y |
| hsa-miR-409-3p | - | PDC     | PDC     |
| hsa-miR-409-3p | - | PDCD10  | PDCD10  |
| hsa-miR-409-3p | - | PDE6H   | PDE6H   |
| hsa-miR-409-3p | - | PDE7A   | PDE7A   |
| hsa-miR-409-3p | - | PDHX    | PDHX    |
| hsa-miR-409-3p | - | PHACTR4 | PHACTR4 |
| hsa-miR-409-3p | - | PHF10   | PHF10   |
| hsa-miR-409-3p | - | PIK3CA  | PIK3CA  |
| hsa-miR-409-3p | - | PIN4    | PIN4    |
| hsa-miR-409-3p | - | PKD1L1  | PKD1L1  |
| hsa-miR-409-3p | - | PLCH2   | PLCH2   |
| hsa-miR-409-3p | - | PLCXD2  | PLCXD2  |
| hsa-miR-409-3p | - | PNPT1   | PNPT1   |
| hsa-miR-409-3p | - | PON2    | PON2    |
| hsa-miR-409-3p | - | PPARG   | PPARG   |
| hsa-miR-409-3p | - | PPHLN1  | PPHLN1  |
| hsa-miR-409-3p | - | PPP2R2B | PPP2R2B |

|                |   |          |          |
|----------------|---|----------|----------|
| hsa-miR-409-3p | - | PRLR     | PRLR     |
| hsa-miR-409-3p | - | PROCR    | PROCR    |
| hsa-miR-409-3p | - | PTGER3   | PTGER3   |
| hsa-miR-409-3p | - | PTPN2    | PTPN2    |
| hsa-miR-409-3p | - | PTPRK    | PTPRK    |
| hsa-miR-409-3p | - | PTPRO    | PTPRO    |
| hsa-miR-409-3p | - | PYGL     | PYGL     |
| hsa-miR-409-3p | - | RAB1A    | RAB1A    |
| hsa-miR-409-3p | - | RABGAP1L | RABGAP1L |
| hsa-miR-409-3p | - | RAP2A    | RAP2A    |
| hsa-miR-409-3p | - | RAPH1    | RAPH1    |
| hsa-miR-409-3p | - | RBM17    | RBM17    |
| hsa-miR-409-3p | - | RBM41    | RBM41    |
| hsa-miR-409-3p | - | RCOR2    | RCOR2    |
| hsa-miR-409-3p | - | REPS1    | REPS1    |
| hsa-miR-409-3p | - | RNASE11  | RNASE11  |
| hsa-miR-409-3p | - | RNF103   | RNF103   |
| hsa-miR-409-3p | - | RNF175   | RNF175   |
| hsa-miR-409-3p | - | RNF6     | RNF6     |
| hsa-miR-409-3p | - | RNMT     | RNMT     |
| hsa-miR-409-3p | - | RP9      | RP9      |
| hsa-miR-409-3p | - | RPGR     | RPGR     |
| hsa-miR-409-3p | - | RPS29    | RPS29    |
| hsa-miR-409-3p | - | RRH      | RRH      |
| hsa-miR-409-3p | - | RTTN     | RTTN     |
| hsa-miR-409-3p | - | SACS     | SACS     |
| hsa-miR-409-3p | - | SATL1    | SATL1    |
| hsa-miR-409-3p | - | SCFD1    | SCFD1    |

|                |   |          |          |
|----------------|---|----------|----------|
| hsa-miR-409-3p | - | SEC61A2  | SEC61A2  |
| hsa-miR-409-3p | - | SEC61B   | SEC61B   |
| hsa-miR-409-3p | - | SENP7    | SENP7    |
| hsa-miR-409-3p | - | SESN3    | SESN3    |
| hsa-miR-409-3p | - | SFRS3    | SFRS3    |
| hsa-miR-409-3p | - | SH3BGR   | SH3BGR   |
| hsa-miR-409-3p | - | SH3BGRL3 | SH3BGRL3 |
| hsa-miR-409-3p | - | SLC15A4  | SLC15A4  |
| hsa-miR-409-3p | - | SLC27A2  | SLC27A2  |
| hsa-miR-409-3p | - | SLC35A1  | SLC35A1  |
| hsa-miR-409-3p | - | SLCO1B3  | SLCO1B3  |
| hsa-miR-409-3p | - | SMAD1    | SMAD1    |
| hsa-miR-409-3p | - | SMYD2    | SMYD2    |
| hsa-miR-409-3p | - | SNW1     | SNW1     |
| hsa-miR-409-3p | - | SNX13    | SNX13    |
| hsa-miR-409-3p | - | SOBP     | SOBP     |
| hsa-miR-409-3p | - | SOD2     | SOD2     |
| hsa-miR-409-3p | - | SP140    | SP140    |
| hsa-miR-409-3p | - | SPA17    | SPA17    |
| hsa-miR-409-3p | - | SSX3     | SSX3     |
| hsa-miR-409-3p | - | STEAP1   | STEAP1   |
| hsa-miR-409-3p | - | STK3     | STK3     |
| hsa-miR-409-3p | - | STK32A   | STK32A   |
| hsa-miR-409-3p | - | STK36    | STK36    |
| hsa-miR-409-3p | - | STRA13   | STRA13   |
| hsa-miR-409-3p | - | SUSD4    | SUSD4    |
| hsa-miR-409-3p | - | SUV420H1 | SUV420H1 |
| hsa-miR-409-3p | - | TAP2     | TAP2     |

|                |   |         |         |
|----------------|---|---------|---------|
| hsa-miR-409-3p | - | TCF7L2  | TCF7L2  |
| hsa-miR-409-3p | - | TEP1    | TEP1    |
| hsa-miR-409-3p | - | TFAP2A  | TFAP2A  |
| hsa-miR-409-3p | - | THOC1   | THOC1   |
| hsa-miR-409-3p | - | TIMM9   | TIMM9   |
| hsa-miR-409-3p | - | TMEM139 | TMEM139 |
| hsa-miR-409-3p | - | TMEM159 | TMEM159 |
| hsa-miR-409-3p | - | TMPO    | TMPO    |
| hsa-miR-409-3p | - | TNKS    | TNKS    |
| hsa-miR-409-3p | - | TNRC6A  | TNRC6A  |
| hsa-miR-409-3p | - | TOP2B   | TOP2B   |
| hsa-miR-409-3p | - | TOPBP1  | TOPBP1  |
| hsa-miR-409-3p | - | TPM1    | TPM1    |
| hsa-miR-409-3p | - | TPM2    | TPM2    |
| hsa-miR-409-3p | - | TPM3    | TPM3    |
| hsa-miR-409-3p | - | TPR     | TPR     |
| hsa-miR-409-3p | - | TPSG1   | TPSG1   |
| hsa-miR-409-3p | - | TRIM21  | TRIM21  |
| hsa-miR-409-3p | - | TRIM34  | TRIM34  |
| hsa-miR-409-3p | - | TXNDC8  | TXNDC8  |
| hsa-miR-409-3p | - | TYK2    | TYK2    |
| hsa-miR-409-3p | - | UBE2D2  | UBE2D2  |
| hsa-miR-409-3p | - | UGT2B17 | UGT2B17 |
| hsa-miR-409-3p | - | ULK4    | ULK4    |
| hsa-miR-409-3p | - | UPK1B   | UPK1B   |
| hsa-miR-409-3p | - | USP38   | USP38   |
| hsa-miR-409-3p | - | USP48   | USP48   |
| hsa-miR-409-3p | - | UTP11L  | UTP11L  |

|                |   |          |          |
|----------------|---|----------|----------|
| hsa-miR-409-3p | - | UTP15    | UTP15    |
| hsa-miR-409-3p | - | VEGFC    | VEGFC    |
| hsa-miR-409-3p | - | WRNIP1   | WRNIP1   |
| hsa-miR-409-3p | - | XPC      | XPC      |
| hsa-miR-409-3p | - | ZBTB2    | ZBTB2    |
| hsa-miR-409-3p | - | ZC3H14   | ZC3H14   |
| hsa-miR-409-3p | - | ZDHHC20  | ZDHHC20  |
| hsa-miR-409-3p | - | ZIC1     | ZIC1     |
| hsa-miR-409-3p | - | ZKSCAN4  | ZKSCAN4  |
| hsa-miR-409-3p | - | ZNF14    | ZNF14    |
| hsa-miR-409-3p | - | ZNF214   | ZNF214   |
| hsa-miR-409-3p | - | ZNF341   | ZNF341   |
| hsa-miR-409-3p | - | ZNF519   | ZNF519   |
| hsa-miR-409-3p | - | ZNF540   | ZNF540   |
| hsa-miR-409-3p | - | ZNF800   | ZNF800   |
| hsa-miR-409-5p | - | ALPK2    | ALPK2    |
| hsa-miR-409-5p | - | ANKAR    | ANKAR    |
| hsa-miR-409-5p | - | APLP2    | APLP2    |
| hsa-miR-409-5p | - | AQP10    | AQP10    |
| hsa-miR-409-5p | - | ARL6IP4  | ARL6IP4  |
| hsa-miR-409-5p | - | ATAD2    | ATAD2    |
| hsa-miR-409-5p | - | ATP6V1C2 | ATP6V1C2 |
| hsa-miR-409-5p | - | BAI3     | BAI3     |
| hsa-miR-409-5p | - | BCAR3    | BCAR3    |
| hsa-miR-409-5p | - | BCKDHB   | BCKDHB   |
| hsa-miR-409-5p | - | BEST4    | BEST4    |
| hsa-miR-409-5p | - | C19orf54 | C19orf54 |
| hsa-miR-409-5p | - | C1orf74  | C1orf74  |

|                |   |          |          |
|----------------|---|----------|----------|
| hsa-miR-409-5p | - | C21orf49 | C21orf49 |
| hsa-miR-409-5p | - | C22orf26 | C22orf26 |
| hsa-miR-409-5p | - | C3orf33  | C3orf33  |
| hsa-miR-409-5p | - | C5orf25  | C5orf25  |
| hsa-miR-409-5p | - | C9orf45  | C9orf45  |
| hsa-miR-409-5p | - | CABYR    | CABYR    |
| hsa-miR-409-5p | - | CAPZA3   | CAPZA3   |
| hsa-miR-409-5p | - | CAST     | CAST     |
| hsa-miR-409-5p | - | CCDC115  | CCDC115  |
| hsa-miR-409-5p | - | CCL11    | CCL11    |
| hsa-miR-409-5p | - | CCT5     | CCT5     |
| hsa-miR-409-5p | - | CD22     | CD22     |
| hsa-miR-409-5p | - | CEPT1    | CEPT1    |
| hsa-miR-409-5p | - | CLEC3A   | CLEC3A   |
| hsa-miR-409-5p | - | CLK2     | CLK2     |
| hsa-miR-409-5p | - | CLP1     | CLP1     |
| hsa-miR-409-5p | - | CLUAP1   | CLUAP1   |
| hsa-miR-409-5p | - | CPSF6    | CPSF6    |
| hsa-miR-409-5p | - | CSPG4    | CSPG4    |
| hsa-miR-409-5p | - | CXCL9    | CXCL9    |
| hsa-miR-409-5p | - | DCLK2    | DCLK2    |
| hsa-miR-409-5p | - | DGKE     | DGKE     |
| hsa-miR-409-5p | - | DHRS2    | DHRS2    |
| hsa-miR-409-5p | - | DIRAS3   | DIRAS3   |
| hsa-miR-409-5p | - | EFNB2    | EFNB2    |
| hsa-miR-409-5p | - | EPB41L3  | EPB41L3  |
| hsa-miR-409-5p | - | EWSR1    | EWSR1    |
| hsa-miR-409-5p | - | FAIM     | FAIM     |



|                |   |           |           |
|----------------|---|-----------|-----------|
| hsa-miR-409-5p | - | FAM57A    | FAM57A    |
| hsa-miR-409-5p | - | FDXR      | FDXR      |
| hsa-miR-409-5p | - | FGD2      | FGD2      |
| hsa-miR-409-5p | - | FLCN      | FLCN      |
| hsa-miR-409-5p | - | FNTA      | FNTA      |
| hsa-miR-409-5p | - | FRS2      | FRS2      |
| hsa-miR-409-5p | - | FTSJ1     | FTSJ1     |
| hsa-miR-409-5p | - | GABRP     | GABRP     |
| hsa-miR-409-5p | - | GNGT1     | GNGT1     |
| hsa-miR-409-5p | - | GPD1      | GPD1      |
| hsa-miR-409-5p | - | GPR112    | GPR112    |
| hsa-miR-409-5p | - | GTF3C2    | GTF3C2    |
| hsa-miR-409-5p | - | HBS1L     | HBS1L     |
| hsa-miR-409-5p | - | HDAC9     | HDAC9     |
| hsa-miR-409-5p | - | HES6      | HES6      |
| hsa-miR-409-5p | - | HOXD10    | HOXD10    |
| hsa-miR-409-5p | - | HYAL1     | HYAL1     |
| hsa-miR-409-5p | - | HYDIN     | HYDIN     |
| hsa-miR-409-5p | - | INSM1     | INSM1     |
| hsa-miR-409-5p | - | KCNK1     | KCNK1     |
| hsa-miR-409-5p | - | KIAA1324L | KIAA1324L |
| hsa-miR-409-5p | - | KIAA1539  | KIAA1539  |
| hsa-miR-409-5p | - | KIF15     | KIF15     |
| hsa-miR-409-5p | - | KIF4A     | KIF4A     |
| hsa-miR-409-5p | - | KIF7      | KIF7      |
| hsa-miR-409-5p | - | KLC2      | KLC2      |
| hsa-miR-409-5p | - | KLC4      | KLC4      |
| hsa-miR-409-5p | - | KLHL18    | KLHL18    |

|                |   |          |          |
|----------------|---|----------|----------|
| hsa-miR-409-5p | - | KRT12    | KRT12    |
| hsa-miR-409-5p | - | KRT73    | KRT73    |
| hsa-miR-409-5p | - | LGALS8   | LGALS8   |
| hsa-miR-409-5p | - | LRP2     | LRP2     |
| hsa-miR-409-5p | - | LRRC17   | LRRC17   |
| hsa-miR-409-5p | - | LSM14B   | LSM14B   |
| hsa-miR-409-5p | - | MAP3K10  | MAP3K10  |
| hsa-miR-409-5p | - | MED4     | MED4     |
| hsa-miR-409-5p | - | MMACHC   | MMACHC   |
| hsa-miR-409-5p | - | MRPS10   | MRPS10   |
| hsa-miR-409-5p | - | NAIP     | NAIP     |
| hsa-miR-409-5p | - | NIT1     | NIT1     |
| hsa-miR-409-5p | - | NPAS2    | NPAS2    |
| hsa-miR-409-5p | - | NR2E1    | NR2E1    |
| hsa-miR-409-5p | - | NUP98    | NUP98    |
| hsa-miR-409-5p | - | NYX      | NYX      |
| hsa-miR-409-5p | - | OPRL1    | OPRL1    |
| hsa-miR-409-5p | - | OSTF1    | OSTF1    |
| hsa-miR-409-5p | - | PAOX     | PAOX     |
| hsa-miR-409-5p | - | PARP3    | PARP3    |
| hsa-miR-409-5p | - | PCDH20   | PCDH20   |
| hsa-miR-409-5p | - | PDE6D    | PDE6D    |
| hsa-miR-409-5p | - | PDIK1L   | PDIK1L   |
| hsa-miR-409-5p | - | PIGX     | PIGX     |
| hsa-miR-409-5p | - | PLA2G3   | PLA2G3   |
| hsa-miR-409-5p | - | PLEKHA8  | PLEKHA8  |
| hsa-miR-409-5p | - | PLEKHH2  | PLEKHH2  |
| hsa-miR-409-5p | - | PNLIPRP3 | PNLIPRP3 |

|                |   |          |          |
|----------------|---|----------|----------|
| hsa-miR-409-5p | - | POLR2K   | POLR2K   |
| hsa-miR-409-5p | - | PPARGC1A | PPARGC1A |
| hsa-miR-409-5p | - | PPP2R3A  | PPP2R3A  |
| hsa-miR-409-5p | - | PRDM16   | PRDM16   |
| hsa-miR-409-5p | - | PRDX2    | PRDX2    |
| hsa-miR-409-5p | - | PTDSS1   | PTDSS1   |
| hsa-miR-409-5p | - | PTGFR    | PTGFR    |
| hsa-miR-409-5p | - | PTK7     | PTK7     |
| hsa-miR-409-5p | - | PUM1     | PUM1     |
| hsa-miR-409-5p | - | PURG     | PURG     |
| hsa-miR-409-5p | - | RAB3GAP1 | RAB3GAP1 |
| hsa-miR-409-5p | - | RARRES2  | RARRES2  |
| hsa-miR-409-5p | - | REXO1    | REXO1    |
| hsa-miR-409-5p | - | RGS12    | RGS12    |
| hsa-miR-409-5p | - | RHOH     | RHOH     |
| hsa-miR-409-5p | - | RNF139   | RNF139   |
| hsa-miR-409-5p | - | RNF180   | RNF180   |
| hsa-miR-409-5p | - | RRAGB    | RRAGB    |
| hsa-miR-409-5p | - | RRP1B    | RRP1B    |
| hsa-miR-409-5p | - | RSU1     | RSU1     |
| hsa-miR-409-5p | - | SEC14L4  | SEC14L4  |
| hsa-miR-409-5p | - | SEMG1    | SEMG1    |
| hsa-miR-409-5p | - | SERF2    | SERF2    |
| hsa-miR-409-5p | - | SFRS11   | SFRS11   |
| hsa-miR-409-5p | - | SHFM1    | SHFM1    |
| hsa-miR-409-5p | - | SIPA1L2  | SIPA1L2  |
| hsa-miR-409-5p | - | SLC15A1  | SLC15A1  |
| hsa-miR-409-5p | - | SLC39A14 | SLC39A14 |

|                |       |         |         |
|----------------|-------|---------|---------|
| hsa-miR-409-5p | -     | SLC39A7 | SLC39A7 |
| hsa-miR-409-5p | -     | SLC41A2 | SLC41A2 |
| hsa-miR-409-5p | -     | SPAG6   | SPAG6   |
| hsa-miR-409-5p | -     | SPTBN2  | SPTBN2  |
| hsa-miR-409-5p | -     | TBC1D2  | TBC1D2  |
| hsa-miR-409-5p | -     | TBC1D8B | TBC1D8B |
| hsa-miR-409-5p | -     | TCF7L1  | TCF7L1  |
| hsa-miR-409-5p | -     | TMC5    | TMC5    |
| hsa-miR-409-5p | -     | TMEM169 | TMEM169 |
| hsa-miR-409-5p | -     | TPD52L3 | TPD52L3 |
| hsa-miR-409-5p | -     | TRO     | TRO     |
| hsa-miR-409-5p | -     | TUBG2   | TUBG2   |
| hsa-miR-409-5p | -     | TXNRD1  | TXNRD1  |
| hsa-miR-409-5p | -     | UBE2E2  | UBE2E2  |
| hsa-miR-409-5p | -     | UBE2L3  | UBE2L3  |
| hsa-miR-409-5p | -     | USP53   | USP53   |
| hsa-miR-409-5p | -     | USP7    | USP7    |
| hsa-miR-409-5p | -     | USP9X   | USP9X   |
| hsa-miR-409-5p | -     | VLDLR   | VLDLR   |
| hsa-miR-409-5p | -     | WFDC9   | WFDC9   |
| hsa-miR-409-5p | -     | XK      | XK      |
| hsa-miR-409-5p | -     | YIPF1   | YIPF1   |
| hsa-miR-409-5p | -     | ZIC1    | ZIC1    |
| hsa-miR-409-5p | -     | ZNF526  | ZNF526  |
| hsa-miR-409-5p | -     | ZNF57   | ZNF57   |
| hsa-miR-410    | -     | ABCA10  | ABCA10  |
| hsa-miR-410    | -     | ACSL3   | ACSL3   |
| hsa-miR-410    | ACSL4 | ACSL4   | -       |
| hsa-miR-410    | -     | ACTN1   | ACTN1   |
| hsa-miR-410    | ACTN4 | ACTN4   | -       |

|             |          |          |          |
|-------------|----------|----------|----------|
| hsa-miR-410 | -        | ACTR10   | ACTR10   |
| hsa-miR-410 | ACVR1C   | ACVR1C   | -        |
| hsa-miR-410 | ADCYAP1  | ADCYAP1  | -        |
| hsa-miR-410 | -        | ADH4     | ADH4     |
| hsa-miR-410 | ADIPOR2  | ADIPOR2  | -        |
| hsa-miR-410 | AEBP2    | AEBP2    | -        |
| hsa-miR-410 | AGFG1    | AGFG1    | -        |
| hsa-miR-410 | AGPAT5   | AGPAT5   | -        |
| hsa-miR-410 | -        | AGPS     | AGPS     |
| hsa-miR-410 | -        | AGTPBP1  | AGTPBP1  |
| hsa-miR-410 | AHCTF1   | AHCTF1   | -        |
| hsa-miR-410 | -        | ALAS1    | ALAS1    |
| hsa-miR-410 | -        | AMDHD1   | AMDHD1   |
| hsa-miR-410 | -        | ANAPC10  | ANAPC10  |
| hsa-miR-410 | -        | ANGPT2   | ANGPT2   |
| hsa-miR-410 | -        | ANKFN1   | ANKFN1   |
| hsa-miR-410 | ANKIB1   | ANKIB1   | -        |
| hsa-miR-410 | ANKRD11  | ANKRD11  | -        |
| hsa-miR-410 | ANKRD12  | ANKRD12  | -        |
| hsa-miR-410 | ANKRD44  | ANKRD44  | -        |
| hsa-miR-410 | APPBP2   | APPBP2   | -        |
| hsa-miR-410 | -        | ARFGEF1  | ARFGEF1  |
| hsa-miR-410 | ARFGEF2  | ARFGEF2  | -        |
| hsa-miR-410 | ARHGAP24 | ARHGAP24 | -        |
| hsa-miR-410 | ARHGAP32 | ARHGAP32 | -        |
| hsa-miR-410 | ARHGAP39 | ARHGAP39 | -        |
| hsa-miR-410 | ARHGAP5  | ARHGAP5  | -        |
| hsa-miR-410 | ARID2    | ARID2    | -        |
| hsa-miR-410 | ARID4B   | ARID4B   | -        |
| hsa-miR-410 | ARMC8    | ARMC8    | -        |
| hsa-miR-410 | -        | ARV1     | ARV1     |
| hsa-miR-410 | -        | ASZ1     | ASZ1     |
| hsa-miR-410 | ATF1     | ATF1     | -        |
| hsa-miR-410 | ATG16L1  | ATG16L1  | -        |
| hsa-miR-410 | -        | ATG4A    | ATG4A    |
| hsa-miR-410 | ATG4C    | ATG4C    | -        |
| hsa-miR-410 | ATN1     | ATN1     | -        |
| hsa-miR-410 | ATP11B   | ATP11B   | -        |
| hsa-miR-410 | ATP1B2   | ATP1B2   | -        |
| hsa-miR-410 | -        | ATP2A2   | ATP2A2   |
| hsa-miR-410 | -        | ATP6V0D2 | ATP6V0D2 |
| hsa-miR-410 | -        | ATP6V1H  | ATP6V1H  |
| hsa-miR-410 | ATP8B2   | ATP8B2   | -        |
| hsa-miR-410 | -        | ATR      | ATR      |
| hsa-miR-410 | AUH      | AUH      | -        |
| hsa-miR-410 | -        | AVIL     | AVIL     |
| hsa-miR-410 | BAZ2A    | BAZ2A    | -        |
| hsa-miR-410 | -        | BCAR3    | BCAR3    |
| hsa-miR-410 | BCL11A   | BCL11A   | -        |
| hsa-miR-410 | BCL11B   | BCL11B   | -        |
| hsa-miR-410 | BCL9L    | BCL9L    | -        |

|             |           |           |           |
|-------------|-----------|-----------|-----------|
| hsa-miR-410 | BDNF      | BDNF      | -         |
| hsa-miR-410 | BEND3     | BEND3     | -         |
| hsa-miR-410 | BHLHE40   | BHLHE40   | -         |
| hsa-miR-410 | -         | BLM       | BLM       |
| hsa-miR-410 | -         | BLZF1     | BLZF1     |
| hsa-miR-410 | -         | BMS1      | BMS1      |
| hsa-miR-410 | BOC       | BOC       | -         |
| hsa-miR-410 | -         | BPTF      | BPTF      |
| hsa-miR-410 | BRD3      | BRD3      | -         |
| hsa-miR-410 | BSDC1     | BSDC1     | -         |
| hsa-miR-410 | BTF3L4    | BTF3L4    | -         |
| hsa-miR-410 | BTG2      | BTG2      | -         |
| hsa-miR-410 | BTG3      | BTG3      | -         |
| hsa-miR-410 | C10orf47  | C10orf47  | -         |
| hsa-miR-410 | C11orf87  | C11orf87  | -         |
| hsa-miR-410 | -         | C12orf26  | C12orf26  |
| hsa-miR-410 | C12orf5   | -         | C12orf5   |
| hsa-miR-410 | C12orf75  | C12orf75  | -         |
| hsa-miR-410 | C13orf15  | C13orf15  | -         |
| hsa-miR-410 | -         | C13orf34  | C13orf34  |
| hsa-miR-410 | C14orf102 | C14orf102 | -         |
| hsa-miR-410 | -         | C14orf126 | C14orf126 |
| hsa-miR-410 | C18orf25  | C18orf25  | -         |
| hsa-miR-410 | -         | C18orf34  | C18orf34  |
| hsa-miR-410 | -         | C1QL3     | C1QL3     |
| hsa-miR-410 | -         | C1orf109  | C1orf109  |
| hsa-miR-410 | -         | C1orf124  | C1orf124  |
| hsa-miR-410 | -         | C1orf131  | C1orf131  |
| hsa-miR-410 | -         | C1orf63   | C1orf63   |
| hsa-miR-410 | -         | C20orf20  | C20orf20  |
| hsa-miR-410 | C21orf91  | C21orf91  | -         |
| hsa-miR-410 | -         | C2orf47   | C2orf47   |
| hsa-miR-410 | C3orf70   | C3orf70   | -         |
| hsa-miR-410 | -         | C4orf31   | C4orf31   |
| hsa-miR-410 | -         | C5orf25   | C5orf25   |
| hsa-miR-410 | C5orf41   | C5orf41   | -         |
| hsa-miR-410 | -         | C7orf11   | C7orf11   |
| hsa-miR-410 | -         | C7orf46   | C7orf46   |
| hsa-miR-410 | -         | C8orf76   | C8orf76   |
| hsa-miR-410 | -         | C9orf21   | C9orf21   |
| hsa-miR-410 | C9orf72   | C9orf72   | -         |
| hsa-miR-410 | CADM4     | CADM4     | -         |
| hsa-miR-410 | CAPN12    | CAPN12    | -         |
| hsa-miR-410 | -         | CARD6     | CARD6     |
| hsa-miR-410 | -         | CBWD1     | CBWD1     |
| hsa-miR-410 | -         | CBWD6     | CBWD6     |
| hsa-miR-410 | CBX3      | CBX3      | -         |
| hsa-miR-410 | CBX4      | CBX4      | -         |
| hsa-miR-410 | -         | CCDC122   | CCDC122   |
| hsa-miR-410 | -         | CCDC42    | CCDC42    |
| hsa-miR-410 | CCNA2     | CCNA2     | -         |

|             |          |          |         |
|-------------|----------|----------|---------|
| hsa-miR-410 | CD200    | CD200    | -       |
| hsa-miR-410 | -        | CD247    | CD247   |
| hsa-miR-410 | CD47     | CD47     | -       |
| hsa-miR-410 | -        | CD9      | CD9     |
| hsa-miR-410 | -        | CDADC1   | CDADC1  |
| hsa-miR-410 | -        | CDC16    | CDC16   |
| hsa-miR-410 | CDC42EP3 | CDC42EP3 | -       |
| hsa-miR-410 | CDK14    | CDK14    | -       |
| hsa-miR-410 | CDKN1C   | CDKN1C   | -       |
| hsa-miR-410 | CDS2     | CDS2     | -       |
| hsa-miR-410 | CEBPB    | CEBPB    | -       |
| hsa-miR-410 | -        | CENPI    | CENPI   |
| hsa-miR-410 | -        | CEP57    | CEP57   |
| hsa-miR-410 | CEP97    | CEP97    | -       |
| hsa-miR-410 | -        | CHIC2    | CHIC2   |
| hsa-miR-410 | CHRDL2   | CHRDL2   | -       |
| hsa-miR-410 | -        | CHRNA1   | CHRNA1  |
| hsa-miR-410 | -        | CLCA2    | CLCA2   |
| hsa-miR-410 | CLCN5    | -        | CLCN5   |
| hsa-miR-410 | CLDN10   | CLDN10   | -       |
| hsa-miR-410 | -        | CLEC6A   | CLEC6A  |
| hsa-miR-410 | -        | CLK3     | CLK3    |
| hsa-miR-410 | -        | CLPX     | CLPX    |
| hsa-miR-410 | -        | CLTC     | CLTC    |
| hsa-miR-410 | -        | CMAH     | CMAH    |
| hsa-miR-410 | CMIP     | CMIP     | -       |
| hsa-miR-410 | -        | CNNM3    | CNNM3   |
| hsa-miR-410 | CNOT2    | CNOT2    | -       |
| hsa-miR-410 | CNOT6L   | CNOT6L   | -       |
| hsa-miR-410 | CNTN4    | CNTN4    | -       |
| hsa-miR-410 | CNTNAP1  | CNTNAP1  | -       |
| hsa-miR-410 | -        | COL15A1  | COL15A1 |
| hsa-miR-410 | -        | COL3A1   | COL3A1  |
| hsa-miR-410 | COL4A1   | COL4A1   | -       |
| hsa-miR-410 | -        | COL8A1   | COL8A1  |
| hsa-miR-410 | -        | COL9A1   | COL9A1  |
| hsa-miR-410 | COPS7B   | COPS7B   | -       |
| hsa-miR-410 | CPEB2    | CPEB2    | -       |
| hsa-miR-410 | CPEB4    | CPEB4    | -       |
| hsa-miR-410 | -        | CRBN     | CRBN    |
| hsa-miR-410 | CREB5    | CREB5    | -       |
| hsa-miR-410 | CREBBP   | CREBBP   | -       |
| hsa-miR-410 | CSF2     | CSF2     | -       |
| hsa-miR-410 | -        | CSTF1    | CSTF1   |
| hsa-miR-410 | CTNND1   | CTNND1   | -       |
| hsa-miR-410 | -        | CXCL14   | CXCL14  |
| hsa-miR-410 | -        | CYP19A1  | CYP19A1 |
| hsa-miR-410 | -        | CYP3A7   | CYP3A7  |
| hsa-miR-410 | DACT1    | DACT1    | -       |
| hsa-miR-410 | -        | DAZL     | DAZL    |
| hsa-miR-410 | DCAF12L1 | DCAF12L1 | -       |

|             |         |          |          |
|-------------|---------|----------|----------|
| hsa-miR-410 | DCDC2   | DCDC2    | -        |
| hsa-miR-410 | -       | DCLRE1A  | DCLRE1A  |
| hsa-miR-410 | -       | DCUN1D5  | DCUN1D5  |
| hsa-miR-410 | -       | DDX26B   | DDX26B   |
| hsa-miR-410 | DDX3X   | DDX3X    | -        |
| hsa-miR-410 | DFNB31  | DFNB31   | -        |
| hsa-miR-410 | DGKB    | DGKB     | -        |
| hsa-miR-410 | DGKG    | DGKG     | -        |
| hsa-miR-410 | -       | DHX36    | DHX36    |
| hsa-miR-410 | -       | DIAPH3   | DIAPH3   |
| hsa-miR-410 | -       | DIMT1L   | DIMT1L   |
| hsa-miR-410 | -       | DIO2     | DIO2     |
| hsa-miR-410 | DIP2A   | DIP2A    | -        |
| hsa-miR-410 | -       | DIP2C    | DIP2C    |
| hsa-miR-410 | -       | DIRC1    | DIRC1    |
| hsa-miR-410 | DLG3    | DLG3     | -        |
| hsa-miR-410 | DLX3    | DLX3     | -        |
| hsa-miR-410 | -       | DMRT1    | DMRT1    |
| hsa-miR-410 | DMRTA2  | DMRTA2   | -        |
| hsa-miR-410 | -       | DNAJB4   | DNAJB4   |
| hsa-miR-410 | DNAL4   | DNAL4    | -        |
| hsa-miR-410 | -       | DOPEY1   | DOPEY1   |
| hsa-miR-410 | -       | DOPEY2   | DOPEY2   |
| hsa-miR-410 | -       | DPP9     | DPP9     |
| hsa-miR-410 | DTNA    | DTNA     | -        |
| hsa-miR-410 | -       | DUSP11   | DUSP11   |
| hsa-miR-410 | -       | DUSP19   | DUSP19   |
| hsa-miR-410 | -       | DYNC1I1  | DYNC1I1  |
| hsa-miR-410 | -       | DYNLL1   | DYNLL1   |
| hsa-miR-410 | -       | EIF1B    | EIF1B    |
| hsa-miR-410 | -       | EIF2C3   | EIF2C3   |
| hsa-miR-410 | EIF4G2  | EIF4G2   | -        |
| hsa-miR-410 | ELMO2   | ELMO2    | -        |
| hsa-miR-410 | -       | ENOX1    | ENOX1    |
| hsa-miR-410 | ENSA    | ENSA     | -        |
| hsa-miR-410 | -       | EPB41L4B | EPB41L4B |
| hsa-miR-410 | ERC1    | ERC1     | -        |
| hsa-miR-410 | -       | ERH      | ERH      |
| hsa-miR-410 | ERO1L   | ERO1L    | -        |
| hsa-miR-410 | ESM1    | ESM1     | -        |
| hsa-miR-410 | ETF1    | ETF1     | -        |
| hsa-miR-410 | ETS1    | ETS1     | -        |
| hsa-miR-410 | ETS2    | ETS2     | -        |
| hsa-miR-410 | ETV5    | ETV5     | -        |
| hsa-miR-410 | ETV6    | ETV6     | -        |
| hsa-miR-410 | EXTL3   | EXTL3    | -        |
| hsa-miR-410 | EZR     | EZR      | -        |
| hsa-miR-410 | -       | FAM105A  | FAM105A  |
| hsa-miR-410 | FAM120C | FAM120C  | -        |
| hsa-miR-410 | FAM162B | FAM162B  | -        |
| hsa-miR-410 | FAM190B | FAM190B  | -        |



|             |         |          |          |
|-------------|---------|----------|----------|
| hsa-miR-410 | FAM19A5 | FAM19A5  | -        |
| hsa-miR-410 | -       | FAM21B   | FAM21B   |
| hsa-miR-410 | FAM45A  | FAM45A   | -        |
| hsa-miR-410 | -       | FAM5C    | FAM5C    |
| hsa-miR-410 | FAM65B  | FAM65B   | -        |
| hsa-miR-410 | -       | FAM9A    | FAM9A    |
| hsa-miR-410 | -       | FAM9B    | FAM9B    |
| hsa-miR-410 | -       | FAM9C    | FAM9C    |
| hsa-miR-410 | FBRS    | FBRS     | -        |
| hsa-miR-410 | -       | FBXL3    | FBXL3    |
| hsa-miR-410 | FBXO33  | FBXO33   | -        |
| hsa-miR-410 | FBXO34  | FBXO34   | -        |
| hsa-miR-410 | FBXO42  | FBXO42   | -        |
| hsa-miR-410 | -       | FBXO43   | FBXO43   |
| hsa-miR-410 | FBXW11  | FBXW11   | -        |
| hsa-miR-410 | -       | FCRLA    | FCRLA    |
| hsa-miR-410 | FGF7    | FGF7     | -        |
| hsa-miR-410 | FGF9    | FGF9     | -        |
| hsa-miR-410 | -       | FGFR1OP2 | FGFR1OP2 |
| hsa-miR-410 | FGFR2   | FGFR2    | -        |
| hsa-miR-410 | FHDC1   | FHDC1    | -        |
| hsa-miR-410 | FLT1    | FLT1     | -        |
| hsa-miR-410 | FMNL2   | FMNL2    | -        |
| hsa-miR-410 | FOXD3   | FOXD3    | -        |
| hsa-miR-410 | FOXF1   | FOXF1    | -        |
| hsa-miR-410 | FOXQ1   | FOXQ1    | -        |
| hsa-miR-410 | -       | FRYL     | FRYL     |
| hsa-miR-410 | -       | FYN      | FYN      |
| hsa-miR-410 | FZD1    | FZD1     | -        |
| hsa-miR-410 | FZD8    | FZD8     | -        |
| hsa-miR-410 | G6PC    | G6PC     | -        |
| hsa-miR-410 | GAD1    | GAD1     | -        |
| hsa-miR-410 | GATA2   | GATA2    | -        |
| hsa-miR-410 | -       | GDF10    | GDF10    |
| hsa-miR-410 | -       | GDF9     | GDF9     |
| hsa-miR-410 | -       | GFM1     | GFM1     |
| hsa-miR-410 | GFPT1   | GFPT1    | -        |
| hsa-miR-410 | GLCE    | GLCE     | -        |
| hsa-miR-410 | GLIS3   | GLIS3    | -        |
| hsa-miR-410 | -       | GLRA3    | GLRA3    |
| hsa-miR-410 | -       | GNG5     | GNG5     |
| hsa-miR-410 | GORAB   | GORAB    | -        |
| hsa-miR-410 | -       | GPC3     | GPC3     |
| hsa-miR-410 | -       | GPLD1    | GPLD1    |
| hsa-miR-410 | -       | GPR21    | GPR21    |
| hsa-miR-410 | -       | GRAMD1A  | GRAMD1A  |
| hsa-miR-410 | GRAMD1B | GRAMD1B  | -        |
| hsa-miR-410 | GRHL3   | GRHL3    | -        |
| hsa-miR-410 | GRIA2   | GRIA2    | -        |
| hsa-miR-410 | -       | GRM3     | GRM3     |
| hsa-miR-410 | -       | GRP      | GRP      |

|             |          |          |          |
|-------------|----------|----------|----------|
| hsa-miR-410 | GSK3B    | GSK3B    | -        |
| hsa-miR-410 | -        | GYG1     | GYG1     |
| hsa-miR-410 | H3F3B    | H3F3B    | -        |
| hsa-miR-410 | HACE1    | HACE1    | -        |
| hsa-miR-410 | HAPLN1   | HAPLN1   | -        |
| hsa-miR-410 | HBEGF    | HBEGF    | -        |
| hsa-miR-410 | -        | HBS1L    | HBS1L    |
| hsa-miR-410 | HDAC1    | HDAC1    | -        |
| hsa-miR-410 | -        | HDAC8    | HDAC8    |
| hsa-miR-410 | HERC3    | HERC3    | -        |
| hsa-miR-410 | HEXIM1   | HEXIM1   | -        |
| hsa-miR-410 | -        | HIBCH    | HIBCH    |
| hsa-miR-410 | -        | HIVEP1   | HIVEP1   |
| hsa-miR-410 | HMGA2    | HMGA2    | -        |
| hsa-miR-410 | HNF4G    | HNF4G    | -        |
| hsa-miR-410 | HNRNPU   | HNRNPU   | -        |
| hsa-miR-410 | HOXA11   | HOXA11   | -        |
| hsa-miR-410 | -        | HSD11B1  | HSD11B1  |
| hsa-miR-410 | HSDL2    | HSDL2    | -        |
| hsa-miR-410 | -        | HSPA6    | HSPA6    |
| hsa-miR-410 | HSPC159  | HSPC159  | -        |
| hsa-miR-410 | -        | HTATIP2  | HTATIP2  |
| hsa-miR-410 | HTRA2    | HTRA2    | -        |
| hsa-miR-410 | -        | HTRA4    | HTRA4    |
| hsa-miR-410 | HUWE1    | HUWE1    | -        |
| hsa-miR-410 | -        | IFRD1    | IFRD1    |
| hsa-miR-410 | -        | IFT80    | IFT80    |
| hsa-miR-410 | IGF1     | IGF1     | -        |
| hsa-miR-410 | -        | IGFBP7   | IGFBP7   |
| hsa-miR-410 | -        | IL1RAPL2 | IL1RAPL2 |
| hsa-miR-410 | IL4      | IL4      | -        |
| hsa-miR-410 | INPP5A   | INPP5A   | -        |
| hsa-miR-410 | IP6K1    | IP6K1    | -        |
| hsa-miR-410 | IQCA1    | IQCA1    | -        |
| hsa-miR-410 | IQCK     | IQCK     | -        |
| hsa-miR-410 | IQSEC1   | IQSEC1   | -        |
| hsa-miR-410 | IRS1     | IRS1     | -        |
| hsa-miR-410 | ITCH     | ITCH     | -        |
| hsa-miR-410 | -        | ITGBL1   | ITGBL1   |
| hsa-miR-410 | ITPKB    | ITPKB    | -        |
| hsa-miR-410 | ITPR2    | ITPR2    | -        |
| hsa-miR-410 | ITPRIPL2 | ITPRIPL2 | -        |
| hsa-miR-410 | -        | IVNS1ABP | IVNS1ABP |
| hsa-miR-410 | -        | IWS1     | IWS1     |
| hsa-miR-410 | -        | JAG1     | JAG1     |
| hsa-miR-410 | JKAMP    | JKAMP    | -        |
| hsa-miR-410 | -        | KCNMA1   | KCNMA1   |
| hsa-miR-410 | KDM2A    | KDM2A    | -        |
| hsa-miR-410 | KDM6A    | KDM6A    | -        |
| hsa-miR-410 | KDR      | KDR      | -        |
| hsa-miR-410 | -        | KIAA0196 | KIAA0196 |

|             |          |          |          |
|-------------|----------|----------|----------|
| hsa-miR-410 | KIAA0355 | KIAA0355 | -        |
| hsa-miR-410 | KIAA0753 | KIAA0753 | -        |
| hsa-miR-410 | KIAA1024 | KIAA1024 | -        |
| hsa-miR-410 | -        | KIAA1586 | KIAA1586 |
| hsa-miR-410 | KIAA2022 | KIAA2022 | -        |
| hsa-miR-410 | -        | KIF13A   | KIF13A   |
| hsa-miR-410 | -        | KIF20A   | KIF20A   |
| hsa-miR-410 | KIT      | KIT      | -        |
| hsa-miR-410 | KLF3     | KLF3     | -        |
| hsa-miR-410 | KLF5     | KLF5     | -        |
| hsa-miR-410 | KLF6     | KLF6     | -        |
| hsa-miR-410 | KLHDC1   | KLHDC1   | -        |
| hsa-miR-410 | KLHL29   | KLHL29   | -        |
| hsa-miR-410 | KLHL5    | KLHL5    | -        |
| hsa-miR-410 | KLHL9    | KLHL9    | -        |
| hsa-miR-410 | -        | KLRD1    | KLRD1    |
| hsa-miR-410 | KRIT1    | KRIT1    | -        |
| hsa-miR-410 | -        | KRTAP1-5 | KRTAP1-5 |
| hsa-miR-410 | -        | L3MBTL4  | L3MBTL4  |
| hsa-miR-410 | -        | LACTB2   | LACTB2   |
| hsa-miR-410 | -        | LAMA5    | LAMA5    |
| hsa-miR-410 | LCORL    | LCORL    | -        |
| hsa-miR-410 | -        | LDHA     | LDHA     |
| hsa-miR-410 | -        | LDHAL6B  | LDHAL6B  |
| hsa-miR-410 | LDLR     | LDLR     | -        |
| hsa-miR-410 | -        | LEFTY2   | LEFTY2   |
| hsa-miR-410 | -        | LEPRE1   | LEPRE1   |
| hsa-miR-410 | -        | LHX8     | LHX8     |
| hsa-miR-410 | LIN54    | LIN54    | -        |
| hsa-miR-410 | LIN7C    | LIN7C    | -        |
| hsa-miR-410 | -        | LMOD3    | LMOD3    |
| hsa-miR-410 | LOXL3    | LOXL3    | -        |
| hsa-miR-410 | LPCAT4   | LPCAT4   | -        |
| hsa-miR-410 | LPHN2    | LPHN2    | -        |
| hsa-miR-410 | LRCH1    | LRCH1    | -        |
| hsa-miR-410 | LRRC4    | LRRC4    | -        |
| hsa-miR-410 | -        | LRRC50   | LRRC50   |
| hsa-miR-410 | -        | LRRC7    | LRRC7    |
| hsa-miR-410 | -        | LRRC8E   | LRRC8E   |
| hsa-miR-410 | LRRFIP2  | LRRFIP2  | -        |
| hsa-miR-410 | -        | LRRK2    | LRRK2    |
| hsa-miR-410 | LUZP2    | LUZP2    | -        |
| hsa-miR-410 | MAB21L1  | MAB21L1  | -        |
| hsa-miR-410 | MAF      | MAF      | -        |
| hsa-miR-410 | MAFG     | MAFG     | -        |
| hsa-miR-410 | -        | MAGEB18  | MAGEB18  |
| hsa-miR-410 | -        | MAGEE1   | MAGEE1   |
| hsa-miR-410 | -        | MAGI1    | MAGI1    |
| hsa-miR-410 | MAGI3    | MAGI3    | -        |
| hsa-miR-410 | -        | MANBA    | MANBA    |
| hsa-miR-410 | -        | MAP2     | MAP2     |

|             |         |         |        |
|-------------|---------|---------|--------|
| hsa-miR-410 | MAP3K12 | MAP3K12 | -      |
| hsa-miR-410 | MAP3K3  | MAP3K3  | -      |
| hsa-miR-410 | -       | MAP4K5  | MAP4K5 |
| hsa-miR-410 | MAPK1   | MAPK1   | -      |
| hsa-miR-410 | -       | MARK1   | MARK1  |
| hsa-miR-410 | -       | MBD5    | MBD5   |
| hsa-miR-410 | MBNL2   | MBNL2   | -      |
| hsa-miR-410 | MCAM    | MCAM    | -      |
| hsa-miR-410 | MCFD2   | MCFD2   | -      |
| hsa-miR-410 | MED13L  | MED13L  | -      |
| hsa-miR-410 | -       | MED6    | MED6   |
| hsa-miR-410 | MEF2A   | MEF2A   | -      |
| hsa-miR-410 | MEF2C   | MEF2C   | -      |
| hsa-miR-410 | METTL10 | METTL10 | -      |
| hsa-miR-410 | MEX3B   | MEX3B   | -      |
| hsa-miR-410 | MEX3C   | MEX3C   | -      |
| hsa-miR-410 | MEX3D   | MEX3D   | -      |
| hsa-miR-410 | -       | MFSD8   | MFSD8  |
| hsa-miR-410 | MGAT4A  | MGAT4A  | -      |
| hsa-miR-410 | MID2    | MID2    | -      |
| hsa-miR-410 | MKL1    | MKL1    | -      |
| hsa-miR-410 | MKLN1   | MKLN1   | -      |
| hsa-miR-410 | MLL2    | MLL2    | -      |
| hsa-miR-410 | MMP14   | MMP14   | -      |
| hsa-miR-410 | -       | MMP8    | MMP8   |
| hsa-miR-410 | -       | MNDA    | MNDA   |
| hsa-miR-410 | MNX1    | MNX1    | -      |
| hsa-miR-410 | MOBKL1A | MOBKL1A | -      |
| hsa-miR-410 | -       | MOXD1   | MOXD1  |
| hsa-miR-410 | MPPED2  | MPPED2  | -      |
| hsa-miR-410 | -       | MRC1    | MRC1   |
| hsa-miR-410 | -       | MRPL11  | MRPL11 |
| hsa-miR-410 | -       | MSI2    | MSI2   |
| hsa-miR-410 | -       | MTBP    | MTBP   |
| hsa-miR-410 | -       | MTRR    | MTRR   |
| hsa-miR-410 | -       | MTX2    | MTX2   |
| hsa-miR-410 | MXD1    | MXD1    | -      |
| hsa-miR-410 | -       | MXRA5   | MXRA5  |
| hsa-miR-410 | -       | MYCN    | MYCN   |
| hsa-miR-410 | -       | MYF5    | MYF5   |
| hsa-miR-410 | MYLIP   | MYLIP   | -      |
| hsa-miR-410 | -       | MYO3A   | MYO3A  |
| hsa-miR-410 | -       | MYO9A   | MYO9A  |
| hsa-miR-410 | -       | MYOT    | MYOT   |
| hsa-miR-410 | MYT1    | MYT1    | -      |
| hsa-miR-410 | NAA15   | NAA15   | -      |
| hsa-miR-410 | NAMPT   | NAMPT   | -      |
| hsa-miR-410 | -       | NARS    | NARS   |
| hsa-miR-410 | -       | NBN     | NBN    |
| hsa-miR-410 | NCALD   | NCALD   | -      |
| hsa-miR-410 | NCOA1   | NCOA1   | -      |

|             |        |         |         |
|-------------|--------|---------|---------|
| hsa-miR-410 | NDFIP1 | NDFIP1  | -       |
| hsa-miR-410 | NDFIP2 | NDFIP2  | -       |
| hsa-miR-410 | NDST3  | NDST3   | -       |
| hsa-miR-410 | -      | NDUFC1  | NDUFC1  |
| hsa-miR-410 | NFAT5  | NFAT5   | -       |
| hsa-miR-410 | -      | NFE2L2  | NFE2L2  |
| hsa-miR-410 | -      | NIPA2   | NIPA2   |
| hsa-miR-410 | NMT1   | NMT1    | -       |
| hsa-miR-410 | -      | NOX4    | NOX4    |
| hsa-miR-410 | NPTX2  | NPTX2   | -       |
| hsa-miR-410 | -      | NPY5R   | NPY5R   |
| hsa-miR-410 | NR3C1  | NR3C1   | -       |
| hsa-miR-410 | NR4A2  | NR4A2   | -       |
| hsa-miR-410 | NRG1   | NRG1    | -       |
| hsa-miR-410 | NRIP1  | NRIP1   | -       |
| hsa-miR-410 | NRXN1  | NRXN1   | -       |
| hsa-miR-410 | -      | NT5C1B  | NT5C1B  |
| hsa-miR-410 | NTRK2  | NTRK2   | -       |
| hsa-miR-410 | NUDT21 | NUDT21  | -       |
| hsa-miR-410 | NUDT3  | NUDT3   | -       |
| hsa-miR-410 | NUMB   | NUMB    | -       |
| hsa-miR-410 | OLIG3  | OLIG3   | -       |
| hsa-miR-410 | -      | OR2H1   | OR2H1   |
| hsa-miR-410 | -      | OR2L13  | OR2L13  |
| hsa-miR-410 | OR51E2 | OR51E2  | -       |
| hsa-miR-410 | OSBP   | OSBP    | -       |
| hsa-miR-410 | OSBP2  | OSBP2   | -       |
| hsa-miR-410 | OSBPL3 | OSBPL3  | -       |
| hsa-miR-410 | OTX2   | OTX2    | -       |
| hsa-miR-410 | PAPD7  | PAPD7   | -       |
| hsa-miR-410 | PAPPA  | PAPPA   | -       |
| hsa-miR-410 | -      | PAPSS1  | PAPSS1  |
| hsa-miR-410 | PARD6G | PARD6G  | -       |
| hsa-miR-410 | PARG   | PARG    | -       |
| hsa-miR-410 | PBRM1  | PBRM1   | -       |
| hsa-miR-410 | PBX3   | PBX3    | -       |
| hsa-miR-410 | PCBP2  | PCBP2   | -       |
| hsa-miR-410 | PCDH10 | PCDH10  | -       |
| hsa-miR-410 | -      | PCDH17  | PCDH17  |
| hsa-miR-410 | PCDH19 | PCDH19  | -       |
| hsa-miR-410 | -      | PCDHB14 | PCDHB14 |
| hsa-miR-410 | -      | PCDHB16 | PCDHB16 |
| hsa-miR-410 | PCNX   | PCNX    | -       |
| hsa-miR-410 | PCSK2  | PCSK2   | -       |
| hsa-miR-410 | -      | PCSK5   | PCSK5   |
| hsa-miR-410 | -      | PDC     | PDC     |
| hsa-miR-410 | PDE4B  | PDE4B   | -       |
| hsa-miR-410 | -      | PDSS1   | PDSS1   |
| hsa-miR-410 | PDZD2  | PDZD2   | -       |
| hsa-miR-410 | -      | PEX7    | PEX7    |
| hsa-miR-410 | -      | PF4V1   | PF4V1   |

|             |           |           |          |
|-------------|-----------|-----------|----------|
| hsa-miR-410 | -         | PGAM4     | PGAM4    |
| hsa-miR-410 | -         | PGBD2     | PGBD2    |
| hsa-miR-410 | PHF6      | PHF6      | -        |
| hsa-miR-410 | -         | PHF8      | PHF8     |
| hsa-miR-410 | -         | PHKB      | PHKB     |
| hsa-miR-410 | -         | PHTF2     | PHTF2    |
| hsa-miR-410 | -         | PIWIL1    | PIWIL1   |
| hsa-miR-410 | PJA2      | PJA2      | -        |
| hsa-miR-410 | -         | PLA2G12B  | PLA2G12B |
| hsa-miR-410 | PLAGL2    | PLAGL2    | -        |
| hsa-miR-410 | PLS1      | PLS1      | -        |
| hsa-miR-410 | PLXNA2    | PLXNA2    | -        |
| hsa-miR-410 | PLXND1    | PLXND1    | -        |
| hsa-miR-410 | PMEPA1    | PMEPA1    | -        |
| hsa-miR-410 | -         | POLA1     | POLA1    |
| hsa-miR-410 | -         | PON2      | PON2     |
| hsa-miR-410 | POU3F2    | POU3F2    | -        |
| hsa-miR-410 | PPAP2B    | PPAP2B    | -        |
| hsa-miR-410 | PPARGC1A  | PPARGC1A  | -        |
| hsa-miR-410 | PPFIA1    | PPFIA1    | -        |
| hsa-miR-410 | PPFIBP1   | PPFIBP1   | -        |
| hsa-miR-410 | -         | PPIG      | PPIG     |
| hsa-miR-410 | PPIL4     | PPIL4     | -        |
| hsa-miR-410 | -         | PPM1A     | PPM1A    |
| hsa-miR-410 | PPM1H     | PPM1H     | -        |
| hsa-miR-410 | PPP1R12B  | PPP1R12B  | -        |
| hsa-miR-410 | PPP1R3F   | PPP1R3F   | -        |
| hsa-miR-410 | -         | PPP3CA    | PPP3CA   |
| hsa-miR-410 | PREX1     | PREX1     | -        |
| hsa-miR-410 | PRIMA1    | PRIMA1    | -        |
| hsa-miR-410 | PRKAR2B   | PRKAR2B   | -        |
| hsa-miR-410 | -         | PRKD1     | PRKD1    |
| hsa-miR-410 | -         | PRKG1     | PRKG1    |
| hsa-miR-410 | -         | PROX1     | PROX1    |
| hsa-miR-410 | PRR12     | PRR12     | -        |
| hsa-miR-410 | PRRX1     | PRRX1     | -        |
| hsa-miR-410 | PRUNE2    | PRUNE2    | -        |
| hsa-miR-410 | -         | PSG1      | PSG1     |
| hsa-miR-410 | -         | PSMD5     | PSMD5    |
| hsa-miR-410 | -         | PSME1     | PSME1    |
| hsa-miR-410 | PTEN      | PTEN      | -        |
| hsa-miR-410 | PTF1A     | PTF1A     | -        |
| hsa-miR-410 | PTGFRN    | PTGFRN    | -        |
| hsa-miR-410 | PTK2      | PTK2      | -        |
| hsa-miR-410 | -         | PTPN4     | PTPN4    |
| hsa-miR-410 | PTPRB     | PTPRB     | -        |
| hsa-miR-410 | ProSAPiP1 | ProSAPiP1 | -        |
| hsa-miR-410 | QKI       | QKI       | -        |
| hsa-miR-410 | RAB1A     | RAB1A     | -        |
| hsa-miR-410 | RAB21     | RAB21     | -        |
| hsa-miR-410 | -         | RAB30     | RAB30    |

|             |         |         |         |
|-------------|---------|---------|---------|
| hsa-miR-410 | -       | RAB4A   | RAB4A   |
| hsa-miR-410 | RAB8B   | RAB8B   | -       |
| hsa-miR-410 | -       | RABGGTB | RABGGTB |
| hsa-miR-410 | RAD23B  | RAD23B  | -       |
| hsa-miR-410 | RAI1    | RAI1    | -       |
| hsa-miR-410 | RAI14   | RAI14   | -       |
| hsa-miR-410 | -       | RANBP1  | RANBP1  |
| hsa-miR-410 | RANBP10 | RANBP10 | -       |
| hsa-miR-410 | RANBP9  | RANBP9  | -       |
| hsa-miR-410 | RAPGEF2 | RAPGEF2 | -       |
| hsa-miR-410 | RAPGEF6 | RAPGEF6 | -       |
| hsa-miR-410 | RASAL2  | RASAL2  | -       |
| hsa-miR-410 | RASSF8  | RASSF8  | -       |
| hsa-miR-410 | -       | RBBP6   | RBBP6   |
| hsa-miR-410 | -       | RBM17   | RBM17   |
| hsa-miR-410 | -       | RBM26   | RBM26   |
| hsa-miR-410 | RBM27   | RBM27   | -       |
| hsa-miR-410 | RBMS2   | RBMS2   | -       |
| hsa-miR-410 | RC3H1   | RC3H1   | -       |
| hsa-miR-410 | RCC2    | RCC2    | -       |
| hsa-miR-410 | -       | RCN2    | RCN2    |
| hsa-miR-410 | RECK    | RECK    | -       |
| hsa-miR-410 | RERE    | RERE    | -       |
| hsa-miR-410 | -       | RFK     | RFK     |
| hsa-miR-410 | -       | RFX3    | RFX3    |
| hsa-miR-410 | RGMB    | RGMB    | -       |
| hsa-miR-410 | -       | RGS18   | RGS18   |
| hsa-miR-410 | RHEB    | RHEB    | -       |
| hsa-miR-410 | -       | RIMS2   | RIMS2   |
| hsa-miR-410 | -       | RINT1   | RINT1   |
| hsa-miR-410 | -       | RLBP1   | RLBP1   |
| hsa-miR-410 | -       | RMI1    | RMI1    |
| hsa-miR-410 | -       | RND1    | RND1    |
| hsa-miR-410 | RNF138  | RNF138  | -       |
| hsa-miR-410 | RNF182  | RNF182  | -       |
| hsa-miR-410 | -       | RNPC3   | RNPC3   |
| hsa-miR-410 | -       | ROR2    | ROR2    |
| hsa-miR-410 | RORA    | RORA    | -       |
| hsa-miR-410 | -       | RORB    | RORB    |
| hsa-miR-410 | -       | RPAIN   | RPAIN   |
| hsa-miR-410 | -       | RPGR    | RPGR    |
| hsa-miR-410 | RPS6KA3 | RPS6KA3 | -       |
| hsa-miR-410 | -       | RTN4    | RTN4    |
| hsa-miR-410 | -       | RUFY2   | RUFY2   |
| hsa-miR-410 | RUNX1T1 | RUNX1T1 | -       |
| hsa-miR-410 | SAMD4A  | SAMD4A  | -       |
| hsa-miR-410 | SAMD4B  | SAMD4B  | -       |
| hsa-miR-410 | -       | SAMSN1  | SAMSN1  |
| hsa-miR-410 | SAR1B   | SAR1B   | -       |
| hsa-miR-410 | SASH1   | SASH1   | -       |
| hsa-miR-410 | SATB2   | SATB2   | -       |

|             |          |          |          |
|-------------|----------|----------|----------|
| hsa-miR-410 | SAV1     | SAV1     | -        |
| hsa-miR-410 | SCAMP5   | SCAMP5   | -        |
| hsa-miR-410 | -        | SCN9A    | SCN9A    |
| hsa-miR-410 | -        | SEC23A   | SEC23A   |
| hsa-miR-410 | -        | SEC23IP  | SEC23IP  |
| hsa-miR-410 | -        | SEC61A2  | SEC61A2  |
| hsa-miR-410 | SENP3    | SENP3    | -        |
| hsa-miR-410 | SERBP1   | SERBP1   | -        |
| hsa-miR-410 | -        | SETD2    | SETD2    |
| hsa-miR-410 | SETDB2   | SETDB2   | -        |
| hsa-miR-410 | SF1      | SF1      | -        |
| hsa-miR-410 | -        | SH3GL3   | SH3GL3   |
| hsa-miR-410 | SHANK2   | SHANK2   | -        |
| hsa-miR-410 | -        | SHROOM4  | SHROOM4  |
| hsa-miR-410 | -        | SIGLEC11 | SIGLEC11 |
| hsa-miR-410 | SIX4     | SIX4     | -        |
| hsa-miR-410 | -        | SLBP     | SLBP     |
| hsa-miR-410 | -        | SLC16A7  | SLC16A7  |
| hsa-miR-410 | SLC25A3  | SLC25A3  | -        |
| hsa-miR-410 | SLC25A42 | SLC25A42 | -        |
| hsa-miR-410 | -        | SLC25A5  | SLC25A5  |
| hsa-miR-410 | SLC26A4  | SLC26A4  | -        |
| hsa-miR-410 | SLC2A1   | SLC2A1   | -        |
| hsa-miR-410 | SLC2A13  | SLC2A13  | -        |
| hsa-miR-410 | -        | SLC30A9  | SLC30A9  |
| hsa-miR-410 | SLC34A2  | SLC34A2  | -        |
| hsa-miR-410 | -        | SLC35A2  | SLC35A2  |
| hsa-miR-410 | -        | SLC39A14 | SLC39A14 |
| hsa-miR-410 | -        | SLC4A8   | SLC4A8   |
| hsa-miR-410 | SLC8A1   | SLC8A1   | -        |
| hsa-miR-410 | SLIT3    | SLIT3    | -        |
| hsa-miR-410 | -        | SLITRK2  | SLITRK2  |
| hsa-miR-410 | SMAD6    | SMAD6    | -        |
| hsa-miR-410 | SMAD7    | SMAD7    | -        |
| hsa-miR-410 | SMPX     | SMPX     | -        |
| hsa-miR-410 | SNAI1    | SNAI1    | -        |
| hsa-miR-410 | SNRPF    | SNRPF    | -        |
| hsa-miR-410 | SNTB1    | SNTB1    | -        |
| hsa-miR-410 | SNX2     | SNX2     | -        |
| hsa-miR-410 | SNX27    | SNX27    | -        |
| hsa-miR-410 | SOS1     | SOS1     | -        |
| hsa-miR-410 | SOX21    | SOX21    | -        |
| hsa-miR-410 | SOX7     | SOX7     | -        |
| hsa-miR-410 | SP1      | SP1      | -        |
| hsa-miR-410 | SP3      | SP3      | -        |
| hsa-miR-410 | SP4      | SP4      | -        |
| hsa-miR-410 | SPATA6   | SPATA6   | -        |
| hsa-miR-410 | -        | SPCS3    | SPCS3    |
| hsa-miR-410 | SPRED1   | SPRED1   | -        |
| hsa-miR-410 | -        | SPRYD5   | SPRYD5   |
| hsa-miR-410 | SRCIN1   | SRCIN1   | -        |



|             |          |          |         |
|-------------|----------|----------|---------|
| hsa-miR-410 | -        | SRP14    | SRP14   |
| hsa-miR-410 | SRPR     | SRPR     | -       |
| hsa-miR-410 | ST18     | ST18     | -       |
| hsa-miR-410 | ST6GAL2  | ST6GAL2  | -       |
| hsa-miR-410 | ST8SIA4  | ST8SIA4  | -       |
| hsa-miR-410 | STAG2    | STAG2    | -       |
| hsa-miR-410 | STARD13  | STARD13  | -       |
| hsa-miR-410 | STARD9   | STARD9   | -       |
| hsa-miR-410 | STAT3    | STAT3    | -       |
| hsa-miR-410 | STRN3    | STRN3    | -       |
| hsa-miR-410 | -        | SUPT3H   | SUPT3H  |
| hsa-miR-410 | -        | SVEP1    | SVEP1   |
| hsa-miR-410 | SVIL     | SVIL     | -       |
| hsa-miR-410 | SYN2     | SYN2     | -       |
| hsa-miR-410 | SYNGAP1  | SYNGAP1  | -       |
| hsa-miR-410 | SYNPR    | SYNPR    | -       |
| hsa-miR-410 | SYP      | SYP      | -       |
| hsa-miR-410 | TAF4     | TAF4     | -       |
| hsa-miR-410 | -        | TAF7L    | TAF7L   |
| hsa-miR-410 | -        | TANK     | TANK    |
| hsa-miR-410 | -        | TBC1D2   | TBC1D2  |
| hsa-miR-410 | TBX18    | TBX18    | -       |
| hsa-miR-410 | -        | TBX22    | TBX22   |
| hsa-miR-410 | TBX5     | TBX5     | -       |
| hsa-miR-410 | TCEAL1   | TCEAL1   | -       |
| hsa-miR-410 | TCEB3    | TCEB3    | -       |
| hsa-miR-410 | TCF4     | TCF4     | -       |
| hsa-miR-410 | -        | TDRD6    | TDRD6   |
| hsa-miR-410 | TEAD1    | TEAD1    | -       |
| hsa-miR-410 | TEAD3    | TEAD3    | -       |
| hsa-miR-410 | TEC      | TEC      | -       |
| hsa-miR-410 | TGFBR2   | TGFBR2   | -       |
| hsa-miR-410 | TIAM1    | TIAM1    | -       |
| hsa-miR-410 | -        | TLR8     | TLR8    |
| hsa-miR-410 | TMEM100  | TMEM100  | -       |
| hsa-miR-410 | TMEM108  | TMEM108  | -       |
| hsa-miR-410 | TMEM132B | TMEM132B | -       |
| hsa-miR-410 | TMEM133  | TMEM133  | -       |
| hsa-miR-410 | -        | TMEM14A  | TMEM14A |
| hsa-miR-410 | -        | TMEM165  | TMEM165 |
| hsa-miR-410 | TMEM188  | TMEM188  | -       |
| hsa-miR-410 | -        | TMEM22   | TMEM22  |
| hsa-miR-410 | -        | TMEM50B  | TMEM50B |
| hsa-miR-410 | TMEM64   | TMEM64   | -       |
| hsa-miR-410 | -        | TMEM66   | TMEM66  |
| hsa-miR-410 | -        | TMEM99   | TMEM99  |
| hsa-miR-410 | TMTC1    | TMTC1    | -       |
| hsa-miR-410 | -        | TNFSF11  | TNFSF11 |
| hsa-miR-410 | TNPO1    | TNPO1    | -       |
| hsa-miR-410 | TNRC18   | TNRC18   | -       |
| hsa-miR-410 | TNRC6C   | TNRC6C   | -       |

|             |        |        |        |
|-------------|--------|--------|--------|
| hsa-miR-410 | TRERF1 | TRERF1 | -      |
| hsa-miR-410 | -      | TRIM23 | TRIM23 |
| hsa-miR-410 | -      | TRIM63 | TRIM63 |
| hsa-miR-410 | -      | TRIM65 | TRIM65 |
| hsa-miR-410 | TRIM9  | TRIM9  | -      |
| hsa-miR-410 | -      | TRIP10 | TRIP10 |
| hsa-miR-410 | -      | TRMT11 | TRMT11 |
| hsa-miR-410 | -      | TRNT1  | TRNT1  |
| hsa-miR-410 | -      | TSNAX  | TSNAX  |
| hsa-miR-410 | -      | TTC19  | TTC19  |
| hsa-miR-410 | -      | TTC28  | TTC28  |
| hsa-miR-410 | -      | TTC32  | TTC32  |
| hsa-miR-410 | -      | TTC33  | TTC33  |
| hsa-miR-410 | -      | TLL11  | TLL11  |
| hsa-miR-410 | TTYH3  | TTYH3  | -      |
| hsa-miR-410 | -      | TUSC3  | TUSC3  |
| hsa-miR-410 | -      | U2AF2  | U2AF2  |
| hsa-miR-410 | UBE2B  | UBE2B  | -      |
| hsa-miR-410 | UBE2H  | UBE2H  | -      |
| hsa-miR-410 | UBE2I  | UBE2I  | -      |
| hsa-miR-410 | UBR2   | UBR2   | -      |
| hsa-miR-410 | UBTF   | UBTF   | -      |
| hsa-miR-410 | UBXN7  | UBXN7  | -      |
| hsa-miR-410 | -      | UCHL5  | UCHL5  |
| hsa-miR-410 | -      | UGT2B4 | UGT2B4 |
| hsa-miR-410 | -      | ULK1   | ULK1   |
| hsa-miR-410 | UNC5A  | UNC5A  | -      |
| hsa-miR-410 | UPK1B  | UPK1B  | -      |
| hsa-miR-410 | -      | UPRT   | UPRT   |
| hsa-miR-410 | -      | USP29  | USP29  |
| hsa-miR-410 | -      | USP33  | USP33  |
| hsa-miR-410 | -      | USP4   | USP4   |
| hsa-miR-410 | -      | USP44  | USP44  |
| hsa-miR-410 | -      | USP47  | USP47  |
| hsa-miR-410 | -      | USP48  | USP48  |
| hsa-miR-410 | USP6NL | USP6NL | -      |
| hsa-miR-410 | VAMP2  | VAMP2  | -      |
| hsa-miR-410 | VANGL2 | VANGL2 | -      |
| hsa-miR-410 | VAT1L  | VAT1L  | -      |
| hsa-miR-410 | VCL    | VCL    | -      |
| hsa-miR-410 | VEGFA  | VEGFA  | -      |
| hsa-miR-410 | -      | VRK2   | VRK2   |
| hsa-miR-410 | WDR31  | WDR31  | -      |
| hsa-miR-410 | WDR82  | WDR82  | -      |
| hsa-miR-410 | WNT11  | WNT11  | -      |
| hsa-miR-410 | WNT5A  | WNT5A  | -      |
| hsa-miR-410 | WNT5B  | WNT5B  | -      |
| hsa-miR-410 | WNT7B  | WNT7B  | -      |
| hsa-miR-410 | WSB1   | WSB1   | -      |
| hsa-miR-410 | XIAP   | XIAP   | -      |
| hsa-miR-410 | -      | XPOT   | XPOT   |

|             |         |          |          |
|-------------|---------|----------|----------|
| hsa-miR-410 | YAF2    | YAF2     | -        |
| hsa-miR-410 | -       | YAP1     | YAP1     |
| hsa-miR-410 | YIPF2   | YIPF2    | -        |
| hsa-miR-410 | YY1     | YY1      | -        |
| hsa-miR-410 | ZBTB34  | ZBTB34   | -        |
| hsa-miR-410 | ZBTB44  | ZBTB44   | -        |
| hsa-miR-410 | ZBTB7A  | ZBTB7A   | -        |
| hsa-miR-410 | ZC3H6   | ZC3H6    | -        |
| hsa-miR-410 | ZC3H7B  | ZC3H7B   | -        |
| hsa-miR-410 | -       | ZCCHC10  | ZCCHC10  |
| hsa-miR-410 | -       | ZCCHC9   | ZCCHC9   |
| hsa-miR-410 | ZDBF2   | ZDBF2    | -        |
| hsa-miR-410 | -       | ZDHHC13  | ZDHHC13  |
| hsa-miR-410 | ZDHHC20 | -        | ZDHHC20  |
| hsa-miR-410 | ZDHHC21 | ZDHHC21  | -        |
| hsa-miR-410 | ZDHHC5  | ZDHHC5   | -        |
| hsa-miR-410 | ZER1    | ZER1     | -        |
| hsa-miR-410 | ZFHX3   | ZFHX3    | -        |
| hsa-miR-410 | ZFHX4   | ZFHX4    | -        |
| hsa-miR-410 | -       | ZFP2     | ZFP2     |
| hsa-miR-410 | ZFP36   | ZFP36    | -        |
| hsa-miR-410 | ZFX     | ZFX      | -        |
| hsa-miR-410 | ZIC1    | ZIC1     | -        |
| hsa-miR-410 | -       | ZNF14    | ZNF14    |
| hsa-miR-410 | ZNF148  | ZNF148   | -        |
| hsa-miR-410 | -       | ZNF248   | ZNF248   |
| hsa-miR-410 | -       | ZNF274   | ZNF274   |
| hsa-miR-410 | -       | ZNF292   | ZNF292   |
| hsa-miR-410 | -       | ZNF318   | ZNF318   |
| hsa-miR-410 | -       | ZNF330   | ZNF330   |
| hsa-miR-410 | -       | ZNF420   | ZNF420   |
| hsa-miR-410 | ZNF449  | ZNF449   | -        |
| hsa-miR-410 | -       | ZNF521   | ZNF521   |
| hsa-miR-410 | -       | ZNF548   | ZNF548   |
| hsa-miR-410 | -       | ZNF577   | ZNF577   |
| hsa-miR-410 | ZNF592  | ZNF592   | -        |
| hsa-miR-410 | ZNF609  | ZNF609   | -        |
| hsa-miR-410 | -       | ZNF81    | ZNF81    |
| hsa-miR-410 | -       | ZNRD1    | ZNRD1    |
| hsa-miR-410 | ZNRF1   | ZNRF1    | -        |
| hsa-miR-410 | -       | ZWINT    | ZWINT    |
| hsa-miR-410 | ZZZ3    | ZZZ3     | -        |
| hsa-miR-411 | -       | ABI3BP   | ABI3BP   |
| hsa-miR-411 | -       | ACSBG2   | ACSBG2   |
| hsa-miR-411 | AKAP5   | AKAP5    | -        |
| hsa-miR-411 | -       | ALKBH3   | ALKBH3   |
| hsa-miR-411 | -       | ANKRA2   | ANKRA2   |
| hsa-miR-411 | -       | ANKRD18A | ANKRD18A |
| hsa-miR-411 | ANTXR2  | ANTXR2   | -        |
| hsa-miR-411 | -       | ANUBL1   | ANUBL1   |
| hsa-miR-411 | APOLD1  | APOLD1   | -        |

|             |          |          |          |
|-------------|----------|----------|----------|
| hsa-miR-411 | ARHGAP5  | ARHGAP5  | -        |
| hsa-miR-411 | -        | ARPC1A   | ARPC1A   |
| hsa-miR-411 | ATAD2B   | ATAD2B   | -        |
| hsa-miR-411 | -        | ATG12    | ATG12    |
| hsa-miR-411 | -        | ATP2C1   | ATP2C1   |
| hsa-miR-411 | -        | ATP5F1   | ATP5F1   |
| hsa-miR-411 | -        | AUH      | AUH      |
| hsa-miR-411 | -        | BAG3     | BAG3     |
| hsa-miR-411 | -        | BCL2L14  | BCL2L14  |
| hsa-miR-411 | -        | BMX      | BMX      |
| hsa-miR-411 | -        | BNIP3    | BNIP3    |
| hsa-miR-411 | C11orf41 | C11orf41 | -        |
| hsa-miR-411 | -        | C1QTNF9  | C1QTNF9  |
| hsa-miR-411 | C1orf144 | C1orf144 | -        |
| hsa-miR-411 | -        | C1orf55  | C1orf55  |
| hsa-miR-411 | C21orf91 | C21orf91 | -        |
| hsa-miR-411 | -        | C6orf105 | C6orf105 |
| hsa-miR-411 | -        | C6orf134 | C6orf134 |
| hsa-miR-411 | -        | C7orf46  | C7orf46  |
| hsa-miR-411 | -        | C8orf38  | C8orf38  |
| hsa-miR-411 | -        | C8orf42  | C8orf42  |
| hsa-miR-411 | -        | C9orf41  | C9orf41  |
| hsa-miR-411 | CACHD1   | CACHD1   | -        |
| hsa-miR-411 | -        | CACNB4   | CACNB4   |
| hsa-miR-411 | CALML4   | CALML4   | -        |
| hsa-miR-411 | CAMSAP1  | CAMSAP1  | -        |
| hsa-miR-411 | -        | CBWD1    | CBWD1    |
| hsa-miR-411 | -        | CBWD5    | CBWD5    |
| hsa-miR-411 | -        | CCDC71   | CCDC71   |
| hsa-miR-411 | CCDC85C  | CCDC85C  | -        |
| hsa-miR-411 | -        | CCDC91   | CCDC91   |
| hsa-miR-411 | -        | CCPG1    | CCPG1    |
| hsa-miR-411 | CD200    | CD200    | -        |
| hsa-miR-411 | -        | CDC42SE2 | CDC42SE2 |
| hsa-miR-411 | -        | CENPC1   | CENPC1   |
| hsa-miR-411 | -        | CHRNA1   | CHRNA1   |
| hsa-miR-411 | -        | CIRH1A   | CIRH1A   |
| hsa-miR-411 | -        | CLCC1    | CLCC1    |
| hsa-miR-411 | CLIP2    | CLIP2    | -        |
| hsa-miR-411 | -        | CLTB     | CLTB     |
| hsa-miR-411 | COG2     | COG2     | -        |
| hsa-miR-411 | CPEB4    | CPEB4    | -        |
| hsa-miR-411 | CREBZF   | CREBZF   | -        |
| hsa-miR-411 | -        | CSN1S1   | CSN1S1   |
| hsa-miR-411 | CTDP1    | CTDP1    | -        |
| hsa-miR-411 | -        | CUTC     | CUTC     |
| hsa-miR-411 | -        | CWF19L2  | CWF19L2  |
| hsa-miR-411 | -        | DDX50    | DDX50    |
| hsa-miR-411 | -        | DHX15    | DHX15    |
| hsa-miR-411 | -        | DIAPH2   | DIAPH2   |
| hsa-miR-411 | -        | DUSP1    | DUSP1    |

|             |          |          |          |
|-------------|----------|----------|----------|
| hsa-miR-411 | -        | EIF2A    | EIF2A    |
| hsa-miR-411 | EIF2C1   | EIF2C1   | -        |
| hsa-miR-411 | EIF4B    | EIF4B    | -        |
| hsa-miR-411 | ELFN1    | ELFN1    | -        |
| hsa-miR-411 | EML4     | EML4     | -        |
| hsa-miR-411 | -        | ENPP3    | ENPP3    |
| hsa-miR-411 | -        | EXOC6    | EXOC6    |
| hsa-miR-411 | -        | EXOSC3   | EXOSC3   |
| hsa-miR-411 | -        | F9       | F9       |
| hsa-miR-411 | -        | FAIM3    | FAIM3    |
| hsa-miR-411 | FAM129B  | FAM129B  | -        |
| hsa-miR-411 | FAM175B  | FAM175B  | -        |
| hsa-miR-411 | -        | FARSA    | FARSA    |
| hsa-miR-411 | FBXL5    | FBXL5    | -        |
| hsa-miR-411 | FBXO34   | FBXO34   | -        |
| hsa-miR-411 | -        | FLT3     | FLT3     |
| hsa-miR-411 | FOXO1    | FOXO1    | -        |
| hsa-miR-411 | FRMD4A   | FRMD4A   | -        |
| hsa-miR-411 | -        | FRMPD1   | FRMPD1   |
| hsa-miR-411 | -        | FRZB     | FRZB     |
| hsa-miR-411 | FUNDC2   | FUNDC2   | -        |
| hsa-miR-411 | FZD4     | FZD4     | -        |
| hsa-miR-411 | -        | GKAP1    | GKAP1    |
| hsa-miR-411 | -        | GLYAT    | GLYAT    |
| hsa-miR-411 | GNAZ     | GNAZ     | -        |
| hsa-miR-411 | -        | GRINA    | GRINA    |
| hsa-miR-411 | -        | GRM3     | GRM3     |
| hsa-miR-411 | -        | GSK3A    | GSK3A    |
| hsa-miR-411 | GTF2I    | GTF2I    | -        |
| hsa-miR-411 | -        | GTPBP8   | GTPBP8   |
| hsa-miR-411 | -        | HCLS1    | HCLS1    |
| hsa-miR-411 | -        | HEATR2   | HEATR2   |
| hsa-miR-411 | -        | HERC5    | HERC5    |
| hsa-miR-411 | -        | HIF1A    | HIF1A    |
| hsa-miR-411 | -        | HLA-DQB2 | HLA-DQB2 |
| hsa-miR-411 | -        | HMG3     | HMG3     |
| hsa-miR-411 | -        | HMMR     | HMMR     |
| hsa-miR-411 | HNRNPA1  | HNRNPA1  | -        |
| hsa-miR-411 | HNRNPH3  | HNRNPH3  | -        |
| hsa-miR-411 | HNRNPUL1 | HNRNPUL1 | -        |
| hsa-miR-411 | -        | HP1BP3   | HP1BP3   |
| hsa-miR-411 | -        | HSP90AA1 | HSP90AA1 |
| hsa-miR-411 | -        | ICAM1    | ICAM1    |
| hsa-miR-411 | -        | IER3     | IER3     |
| hsa-miR-411 | -        | IL19     | IL19     |
| hsa-miR-411 | -        | INTS4    | INTS4    |
| hsa-miR-411 | -        | IQCF2    | IQCF2    |
| hsa-miR-411 | -        | ITFG3    | ITFG3    |
| hsa-miR-411 | -        | ITGBL1   | ITGBL1   |
| hsa-miR-411 | -        | ITSN2    | ITSN2    |
| hsa-miR-411 | -        | JAGN1    | JAGN1    |

|             |        |           |           |
|-------------|--------|-----------|-----------|
| hsa-miR-411 | -      | JMJD1C    | JMJD1C    |
| hsa-miR-411 | KDM6A  | KDM6A     | -         |
| hsa-miR-411 | -      | KHDRBS3   | KHDRBS3   |
| hsa-miR-411 | -      | KIAA0748  | KIAA0748  |
| hsa-miR-411 | -      | KIAA1143  | KIAA1143  |
| hsa-miR-411 | -      | KIAA1324L | KIAA1324L |
| hsa-miR-411 | -      | KIAA1614  | KIAA1614  |
| hsa-miR-411 | -      | KIF4A     | KIF4A     |
| hsa-miR-411 | -      | KIR2DL1   | KIR2DL1   |
| hsa-miR-411 | -      | KIR2DL4   | KIR2DL4   |
| hsa-miR-411 | -      | KIR3DL1   | KIR3DL1   |
| hsa-miR-411 | KLC1   | KLC1      | -         |
| hsa-miR-411 | -      | KLRD1     | KLRD1     |
| hsa-miR-411 | -      | L1CAM     | L1CAM     |
| hsa-miR-411 | -      | LARS      | LARS      |
| hsa-miR-411 | -      | LEF1      | LEF1      |
| hsa-miR-411 | -      | LRRFIP1   | LRRFIP1   |
| hsa-miR-411 | -      | LUZP2     | LUZP2     |
| hsa-miR-411 | -      | LYSMD2    | LYSMD2    |
| hsa-miR-411 | -      | MAGEA5    | MAGEA5    |
| hsa-miR-411 | -      | MAGED1    | MAGED1    |
| hsa-miR-411 | -      | MAGEE2    | MAGEE2    |
| hsa-miR-411 | -      | MAGEF1    | MAGEF1    |
| hsa-miR-411 | MAML3  | MAML3     | -         |
| hsa-miR-411 | MAP3K1 | MAP3K1    | -         |
| hsa-miR-411 | -      | MARCH9    | MARCH9    |
| hsa-miR-411 | -      | MARK1     | MARK1     |
| hsa-miR-411 | -      | MAST4     | MAST4     |
| hsa-miR-411 | -      | MCAT      | MCAT      |
| hsa-miR-411 | -      | MECR      | MECR      |
| hsa-miR-411 | -      | MEGF8     | MEGF8     |
| hsa-miR-411 | -      | METTL5    | METTL5    |
| hsa-miR-411 | -      | METTL7A   | METTL7A   |
| hsa-miR-411 | MIB1   | MIB1      | -         |
| hsa-miR-411 | -      | MITD1     | MITD1     |
| hsa-miR-411 | -      | MMD       | MMD       |
| hsa-miR-411 | -      | MPHOSPH6  | MPHOSPH6  |
| hsa-miR-411 | -      | MS4A12    | MS4A12    |
| hsa-miR-411 | -      | MTBP      | MTBP      |
| hsa-miR-411 | NAB1   | NAB1      | -         |
| hsa-miR-411 | NAV3   | NAV3      | -         |
| hsa-miR-411 | -      | NEDD8     | NEDD8     |
| hsa-miR-411 | -      | NPC1      | NPC1      |
| hsa-miR-411 | -      | NRBP1     | NRBP1     |
| hsa-miR-411 | -      | NT5C3L    | NT5C3L    |
| hsa-miR-411 | NUDT4  | NUDT4     | -         |
| hsa-miR-411 | -      | OASL      | OASL      |
| hsa-miR-411 | -      | ODZ3      | ODZ3      |
| hsa-miR-411 | -      | OTOG      | OTOG      |
| hsa-miR-411 | -      | PAWR      | PAWR      |
| hsa-miR-411 | -      | PBLD      | PBLD      |

|             |         |          |          |
|-------------|---------|----------|----------|
| hsa-miR-411 | PDS5A   | PDS5A    | -        |
| hsa-miR-411 | PFN1    | PFN1     | -        |
| hsa-miR-411 | -       | PLA2G4C  | PLA2G4C  |
| hsa-miR-411 | -       | PLCL2    | PLCL2    |
| hsa-miR-411 | -       | POLR2A   | POLR2A   |
| hsa-miR-411 | -       | POLR2C   | POLR2C   |
| hsa-miR-411 | -       | PPAPDC1A | PPAPDC1A |
| hsa-miR-411 | -       | PPP1R1C  | PPP1R1C  |
| hsa-miR-411 | -       | PPP2R5B  | PPP2R5B  |
| hsa-miR-411 | -       | PRKCH    | PRKCH    |
| hsa-miR-411 | -       | PRPF38B  | PRPF38B  |
| hsa-miR-411 | -       | PTCHD1   | PTCHD1   |
| hsa-miR-411 | -       | PTPN12   | PTPN12   |
| hsa-miR-411 | -       | PTPN13   | PTPN13   |
| hsa-miR-411 | -       | PTPRC    | PTPRC    |
| hsa-miR-411 | PUM1    | PUM1     | -        |
| hsa-miR-411 | RAB10   | RAB10    | -        |
| hsa-miR-411 | RAB21   | RAB21    | -        |
| hsa-miR-411 | -       | RAD51    | RAD51    |
| hsa-miR-411 | RAPGEF2 | RAPGEF2  | -        |
| hsa-miR-411 | RECQL   | RECQL    | -        |
| hsa-miR-411 | -       | REEP5    | REEP5    |
| hsa-miR-411 | -       | RFX5     | RFX5     |
| hsa-miR-411 | RYBP    | RYBP     | -        |
| hsa-miR-411 | SCD5    | SCD5     | -        |
| hsa-miR-411 | -       | SCN9A    | SCN9A    |
| hsa-miR-411 | -       | SDCCAG1  | SDCCAG1  |
| hsa-miR-411 | SF3B3   | -        | SF3B3    |
| hsa-miR-411 | -       | SH3BP5   | SH3BP5   |
| hsa-miR-411 | SIRT7   | SIRT7    | -        |
| hsa-miR-411 | -       | SKAP2    | SKAP2    |
| hsa-miR-411 | -       | SLC25A27 | SLC25A27 |
| hsa-miR-411 | -       | SLC35A1  | SLC35A1  |
| hsa-miR-411 | -       | SLC38A3  | SLC38A3  |
| hsa-miR-411 | -       | SLC6A16  | SLC6A16  |
| hsa-miR-411 | -       | SLC7A7   | SLC7A7   |
| hsa-miR-411 | SMAD4   | SMAD4    | -        |
| hsa-miR-411 | SP2     | SP2      | -        |
| hsa-miR-411 | -       | SPAG9    | SPAG9    |
| hsa-miR-411 | -       | SPATA8   | SPATA8   |
| hsa-miR-411 | SPRY4   | SPRY4    | -        |
| hsa-miR-411 | -       | SRPX     | SRPX     |
| hsa-miR-411 | -       | SS18L2   | SS18L2   |
| hsa-miR-411 | -       | SYCE1    | SYCE1    |
| hsa-miR-411 | -       | SYT16    | SYT16    |
| hsa-miR-411 | SYT4    | SYT4     | -        |
| hsa-miR-411 | -       | TARBP2   | TARBP2   |
| hsa-miR-411 | -       | TDRD5    | TDRD5    |
| hsa-miR-411 | -       | TFR2     | TFR2     |
| hsa-miR-411 | -       | TGFBRAP1 | TGFBRAP1 |
| hsa-miR-411 | -       | TLE4     | TLE4     |

|             |         |         |         |
|-------------|---------|---------|---------|
| hsa-miR-411 | -       | TM4SF1  | TM4SF1  |
| hsa-miR-411 | -       | TMCO6   | TMCO6   |
| hsa-miR-411 | -       | TMEM14B | TMEM14B |
| hsa-miR-411 | -       | TMEM14C | TMEM14C |
| hsa-miR-411 | TMEM189 | TMEM189 | -       |
| hsa-miR-411 | -       | TMEM65  | TMEM65  |
| hsa-miR-411 | -       | TMEM71  | TMEM71  |
| hsa-miR-411 | -       | TOPORS  | TOPORS  |
| hsa-miR-411 | -       | TRAF3   | TRAF3   |
| hsa-miR-411 | -       | TRIM4   | TRIM4   |
| hsa-miR-411 | -       | TUBAL3  | TUBAL3  |
| hsa-miR-411 | -       | TUBB2B  | TUBB2B  |
| hsa-miR-411 | -       | TXNDC6  | TXNDC6  |
| hsa-miR-411 | -       | TXNIP   | TXNIP   |
| hsa-miR-411 | -       | TXNL4B  | TXNL4B  |
| hsa-miR-411 | UBE2R2  | UBE2R2  | -       |
| hsa-miR-411 | -       | UQCRQ   | UQCRQ   |
| hsa-miR-411 | -       | USP25   | USP25   |
| hsa-miR-411 | USP32   | USP32   | -       |
| hsa-miR-411 | -       | USP34   | USP34   |
| hsa-miR-411 | -       | UXS1    | UXS1    |
| hsa-miR-411 | VPS53   | VPS53   | -       |
| hsa-miR-411 | -       | WASF1   | WASF1   |
| hsa-miR-411 | -       | WDR19   | WDR19   |
| hsa-miR-411 | YAF2    | YAF2    | -       |
| hsa-miR-411 | -       | ZBTB38  | ZBTB38  |
| hsa-miR-411 | -       | ZBTB44  | ZBTB44  |
| hsa-miR-411 | -       | ZFP36   | ZFP36   |
| hsa-miR-411 | -       | ZFYVE21 | ZFYVE21 |
| hsa-miR-411 | -       | ZKSCAN3 | ZKSCAN3 |
| hsa-miR-411 | -       | ZNF184  | ZNF184  |
| hsa-miR-411 | -       | ZNF20   | ZNF20   |
| hsa-miR-411 | -       | ZNF337  | ZNF337  |
| hsa-miR-411 | ZNF518A | ZNF518A | -       |
| hsa-miR-411 | -       | ZNF567  | ZNF567  |
| hsa-miR-411 | -       | ZNF646  | ZNF646  |
| hsa-miR-411 | ZNRF3   | ZNRF3   | -       |
| hsa-miR-411 | -       | ZRANB3  | ZRANB3  |
| hsa-miR-411 | -       | ZSCAN23 | ZSCAN23 |
| hsa-miR-432 | ABCA3   | ABCA3   | -       |
| hsa-miR-432 | ABCC5   | ABCC5   | -       |
| hsa-miR-432 | ABHD6   | ABHD6   | -       |
| hsa-miR-432 | ABI1    | ABI1    | -       |
| hsa-miR-432 | ABL1    | ABL1    | -       |
| hsa-miR-432 | ABLIM1  | ABLIM1  | -       |
| hsa-miR-432 | ACACB   | ACACB   | -       |
| hsa-miR-432 | ACO2    | -       | ACO2    |
| hsa-miR-432 | ACOT13  | ACOT13  | -       |
| hsa-miR-432 | ACPP    | ACPP    | -       |
| hsa-miR-432 | ACTR3   | ACTR3   | -       |
| hsa-miR-432 | ADAL    | ADAL    | -       |



|             |           |           |          |
|-------------|-----------|-----------|----------|
| hsa-miR-432 | ADAM12    | ADAM12    | -        |
| hsa-miR-432 | ADAM22    | ADAM22    | -        |
| hsa-miR-432 | ADAR      | ADAR      | -        |
| hsa-miR-432 | ADARB1    | ADARB1    | -        |
| hsa-miR-432 | ADCY2     | ADCY2     | -        |
| hsa-miR-432 | ADD1      | ADD1      | -        |
| hsa-miR-432 | ADH6      | ADH6      | -        |
| hsa-miR-432 | ADI1      | ADI1      | -        |
| hsa-miR-432 | ADRA2A    | ADRA2A    | -        |
| hsa-miR-432 | AFAP1L2   | AFAP1L2   | -        |
| hsa-miR-432 | AGK       | AGK       | -        |
| hsa-miR-432 | AGPAT5    | AGPAT5    | -        |
| hsa-miR-432 | AGPS      | AGPS      | -        |
| hsa-miR-432 | AGR2      | AGR2      | -        |
| hsa-miR-432 | AHCYL2    | AHCYL2    | -        |
| hsa-miR-432 | AIF1L     | AIF1L     | -        |
| hsa-miR-432 | AJAP1     | AJAP1     | -        |
| hsa-miR-432 | AKAP13    | AKAP13    | -        |
| hsa-miR-432 | AKIRIN1   | AKIRIN1   | -        |
| hsa-miR-432 | AKR1E2    | AKR1E2    | -        |
| hsa-miR-432 | AKR7L     | AKR7L     | -        |
| hsa-miR-432 | ALDH1L2   | ALDH1L2   | -        |
| hsa-miR-432 | ALG6      | ALG6      | -        |
| hsa-miR-432 | ALX3      | -         | ALX3     |
| hsa-miR-432 | AMD1      | AMD1      | -        |
| hsa-miR-432 | AMOT      | AMOT      | -        |
| hsa-miR-432 | ANGPTL4   | -         | ANGPTL4  |
| hsa-miR-432 | ANGPTL7   | ANGPTL7   | -        |
| hsa-miR-432 | ANKFY1    | ANKFY1    | -        |
| hsa-miR-432 | ANKRD29   | ANKRD29   | -        |
| hsa-miR-432 | ANKRD39   | ANKRD39   | -        |
| hsa-miR-432 | ANKRD42   | ANKRD42   | -        |
| hsa-miR-432 | ANKS1A    | ANKS1A    | -        |
| hsa-miR-432 | ANTXR2    | ANTXR2    | -        |
| hsa-miR-432 | -         | ANTXRL    | ANTXRL   |
| hsa-miR-432 | AOC3      | AOC3      | -        |
| hsa-miR-432 | AP2B1     | AP2B1     | -        |
| hsa-miR-432 | AP3S1     | AP3S1     | -        |
| hsa-miR-432 | APAF1     | APAF1     | -        |
| hsa-miR-432 | APOBEC3G  | -         | APOBEC3G |
| hsa-miR-432 | ARAP1     | ARAP1     | -        |
| hsa-miR-432 | ARFGAP1   | ARFGAP1   | -        |
| hsa-miR-432 | ARHGAP11A | ARHGAP11A | -        |
| hsa-miR-432 | ARHGAP28  | ARHGAP28  | -        |
| hsa-miR-432 | ARHGEF10L | ARHGEF10L | -        |
| hsa-miR-432 | ARHGEF11  | ARHGEF11  | -        |
| hsa-miR-432 | ARHGEF2   | ARHGEF2   | -        |
| hsa-miR-432 | ARHGEF4   | ARHGEF4   | -        |
| hsa-miR-432 | ARID1B    | ARID1B    | -        |
| hsa-miR-432 | ARID5B    | ARID5B    | -        |
| hsa-miR-432 | ARL5B     | ARL5B     | -        |

|             |           |           |          |
|-------------|-----------|-----------|----------|
| hsa-miR-432 | -         | ARMC3     | ARMC3    |
| hsa-miR-432 | ARMC5     | ARMC5     | -        |
| hsa-miR-432 | ARMC7     | ARMC7     | -        |
| hsa-miR-432 | ARNT      | ARNT      | -        |
| hsa-miR-432 | ARSB      | ARSB      | -        |
| hsa-miR-432 | ARSD      | ARSD      | -        |
| hsa-miR-432 | ARSI      | -         | ARSI     |
| hsa-miR-432 | ASH1L     | ASH1L     | -        |
| hsa-miR-432 | ASPH      | ASPH      | -        |
| hsa-miR-432 | -         | ASTE1     | ASTE1    |
| hsa-miR-432 | ATF1      | ATF1      | -        |
| hsa-miR-432 | ATG12     | ATG12     | -        |
| hsa-miR-432 | ATG4A     | ATG4A     | -        |
| hsa-miR-432 | ATOH8     | -         | ATOH8    |
| hsa-miR-432 | ATP10D    | ATP10D    | -        |
| hsa-miR-432 | -         | ATP1A4    | ATP1A4   |
| hsa-miR-432 | ATP6V1C2  | ATP6V1C2  | -        |
| hsa-miR-432 | ATP7B     | ATP7B     | -        |
| hsa-miR-432 | AXIN2     | AXIN2     | -        |
| hsa-miR-432 | B3GALT1   | B3GALT1   | -        |
| hsa-miR-432 | B3GALTL   | B3GALTL   | -        |
| hsa-miR-432 | B4GALNT4  | B4GALNT4  | -        |
| hsa-miR-432 | BAAT      | BAAT      | -        |
| hsa-miR-432 | BACE1     | BACE1     | -        |
| hsa-miR-432 | BAK1      | BAK1      | -        |
| hsa-miR-432 | BBS10     | BBS10     | -        |
| hsa-miR-432 | BCAP31    | BCAP31    | -        |
| hsa-miR-432 | BCAS3     | BCAS3     | -        |
| hsa-miR-432 | BCL11A    | BCL11A    | -        |
| hsa-miR-432 | BCL2L11   | BCL2L11   | -        |
| hsa-miR-432 | BDKRB2    | BDKRB2    | -        |
| hsa-miR-432 | BEND3     | BEND3     | -        |
| hsa-miR-432 | BEST1     | BEST1     | -        |
| hsa-miR-432 | BET1      | BET1      | -        |
| hsa-miR-432 | BHLHE41   | BHLHE41   | -        |
| hsa-miR-432 | BHMT2     | BHMT2     | -        |
| hsa-miR-432 | BPGM      | BPGM      | -        |
| hsa-miR-432 | -         | BRD4      | BRD4     |
| hsa-miR-432 | BRD9      | BRD9      | -        |
| hsa-miR-432 | BRF1      | -         | BRF1     |
| hsa-miR-432 | BRIP1     | BRIP1     | -        |
| hsa-miR-432 | BRPF1     | BRPF1     | -        |
| hsa-miR-432 | BTBD7     | BTBD7     | -        |
| hsa-miR-432 | BTRC      | BTRC      | -        |
| hsa-miR-432 | BZRAP1    | BZRAP1    | -        |
| hsa-miR-432 | C10orf140 | C10orf140 | -        |
| hsa-miR-432 | C10orf81  | C10orf81  | -        |
| hsa-miR-432 | C12orf34  | C12orf34  | -        |
| hsa-miR-432 | C12orf43  | C12orf43  | -        |
| hsa-miR-432 | -         | C12orf50  | C12orf50 |
| hsa-miR-432 | -         | C12orf52  | C12orf52 |

|             |           |           |           |
|-------------|-----------|-----------|-----------|
| hsa-miR-432 | C12orf68  | C12orf68  | -         |
| hsa-miR-432 | C13orf36  | C13orf36  | -         |
| hsa-miR-432 | C14orf101 | C14orf101 | -         |
| hsa-miR-432 | C14orf105 | C14orf105 | -         |
| hsa-miR-432 | C14orf129 | C14orf129 | -         |
| hsa-miR-432 | C14orf153 | C14orf153 | -         |
| hsa-miR-432 | C14orf28  | C14orf28  | -         |
| hsa-miR-432 | -         | C14orf70  | C14orf70  |
| hsa-miR-432 | C15orf17  | C15orf17  | -         |
| hsa-miR-432 | C15orf42  | C15orf42  | -         |
| hsa-miR-432 | C15orf52  | C15orf52  | -         |
| hsa-miR-432 | C15orf54  | C15orf54  | -         |
| hsa-miR-432 | C15orf56  | C15orf56  | -         |
| hsa-miR-432 | C15orf63  | C15orf63  | -         |
| hsa-miR-432 | C16orf45  | C16orf45  | -         |
| hsa-miR-432 | C16orf53  | C16orf53  | -         |
| hsa-miR-432 | -         | C19orf44  | C19orf44  |
| hsa-miR-432 | C1RL      | C1RL      | -         |
| hsa-miR-432 | C1orf130  | C1orf130  | -         |
| hsa-miR-432 | C1orf150  | C1orf150  | -         |
| hsa-miR-432 | C1orf174  | C1orf174  | -         |
| hsa-miR-432 | C1orf183  | C1orf183  | -         |
| hsa-miR-432 | C1orf198  | C1orf198  | -         |
| hsa-miR-432 | C1orf226  | C1orf226  | -         |
| hsa-miR-432 | C20orf151 | -         | C20orf151 |
| hsa-miR-432 | C20orf177 | C20orf177 | -         |
| hsa-miR-432 | C20orf197 | C20orf197 | -         |
| hsa-miR-432 | -         | C20orf26  | C20orf26  |
| hsa-miR-432 | -         | C22orf27  | C22orf27  |
| hsa-miR-432 | C22orf40  | C22orf40  | -         |
| hsa-miR-432 | C22orf46  | C22orf46  | -         |
| hsa-miR-432 | C2orf44   | C2orf44   | -         |
| hsa-miR-432 | C2orf68   | C2orf68   | -         |
| hsa-miR-432 | C2orf88   | C2orf88   | -         |
| hsa-miR-432 | C3orf18   | -         | C3orf18   |
| hsa-miR-432 | C3orf19   | C3orf19   | -         |
| hsa-miR-432 | C3orf58   | C3orf58   | -         |
| hsa-miR-432 | C4orf3    | C4orf3    | -         |
| hsa-miR-432 | C4orf46   | C4orf46   | -         |
| hsa-miR-432 | C5        | C5        | -         |
| hsa-miR-432 | C5orf15   | C5orf15   | -         |
| hsa-miR-432 | -         | C5orf35   | C5orf35   |
| hsa-miR-432 | C6orf105  | C6orf105  | -         |
| hsa-miR-432 | C6orf146  | -         | C6orf146  |
| hsa-miR-432 | C6orf35   | C6orf35   | -         |
| hsa-miR-432 | C8orf46   | C8orf46   | -         |
| hsa-miR-432 | C8orf48   | C8orf48   | -         |
| hsa-miR-432 | C8orf86   | C8orf86   | -         |
| hsa-miR-432 | C9orf16   | -         | C9orf16   |
| hsa-miR-432 | C9orf163  | C9orf163  | -         |
| hsa-miR-432 | C9orf37   | -         | C9orf37   |

|             |          |          |        |
|-------------|----------|----------|--------|
| hsa-miR-432 | C9orf40  | C9orf40  | -      |
| hsa-miR-432 | C9orf5   | C9orf5   | -      |
| hsa-miR-432 | C9orf57  | C9orf57  | -      |
| hsa-miR-432 | C9orf95  | C9orf95  | -      |
| hsa-miR-432 | CA12     | CA12     | -      |
| hsa-miR-432 | CA7      | CA7      | -      |
| hsa-miR-432 | CACNG3   | CACNG3   | -      |
| hsa-miR-432 | CACNG4   | CACNG4   | -      |
| hsa-miR-432 | CACNG7   | CACNG7   | -      |
| hsa-miR-432 | CALCOCO2 | CALCOCO2 | -      |
| hsa-miR-432 | CALCR    | CALCR    | -      |
| hsa-miR-432 | -        | CALM2    | CALM2  |
| hsa-miR-432 | CALML4   | CALML4   | -      |
| hsa-miR-432 | CAMK1G   | CAMK1G   | -      |
| hsa-miR-432 | CAMK2B   | CAMK2B   | -      |
| hsa-miR-432 | CAMK2D   | CAMK2D   | -      |
| hsa-miR-432 | CAMSAP1  | CAMSAP1  | -      |
| hsa-miR-432 | CASKIN1  | CASKIN1  | -      |
| hsa-miR-432 | CBLB     | -        | CBLB   |
| hsa-miR-432 | CCDC105  | CCDC105  | -      |
| hsa-miR-432 | CCDC140  | CCDC140  | -      |
| hsa-miR-432 | CCDC142  | CCDC142  | -      |
| hsa-miR-432 | CCDC150  | CCDC150  | -      |
| hsa-miR-432 | -        | CCDC23   | CCDC23 |
| hsa-miR-432 | CCDC3    | CCDC3    | -      |
| hsa-miR-432 | CCDC34   | CCDC34   | -      |
| hsa-miR-432 | CCDC47   | CCDC47   | -      |
| hsa-miR-432 | CCDC54   | CCDC54   | -      |
| hsa-miR-432 | CCDC74B  | CCDC74B  | -      |
| hsa-miR-432 | CCDC86   | CCDC86   | -      |
| hsa-miR-432 | CCDC88A  | CCDC88A  | -      |
| hsa-miR-432 | CCDC93   | CCDC93   | -      |
| hsa-miR-432 | CCL22    | CCL22    | -      |
| hsa-miR-432 | CCNY     | CCNY     | -      |
| hsa-miR-432 | CCNYL1   | CCNYL1   | -      |
| hsa-miR-432 | CCR5     | CCR5     | -      |
| hsa-miR-432 | CCR7     | CCR7     | -      |
| hsa-miR-432 | CD274    | CD274    | -      |
| hsa-miR-432 | CD2BP2   | CD2BP2   | -      |
| hsa-miR-432 | CD34     | CD34     | -      |
| hsa-miR-432 | CD40LG   | CD40LG   | -      |
| hsa-miR-432 | CD58     | CD58     | -      |
| hsa-miR-432 | CD6      | CD6      | -      |
| hsa-miR-432 | CD7      | -        | CD7    |
| hsa-miR-432 | CD74     | CD74     | -      |
| hsa-miR-432 | CD83     | CD83     | -      |
| hsa-miR-432 | CD84     | CD84     | -      |
| hsa-miR-432 | CDH10    | CDH10    | -      |
| hsa-miR-432 | CDHR1    | CDHR1    | -      |
| hsa-miR-432 | CDK13    | CDK13    | -      |
| hsa-miR-432 | CDK2AP1  | CDK2AP1  | -      |

|             |           |           |        |
|-------------|-----------|-----------|--------|
| hsa-miR-432 | CDKAL1    | CDKAL1    | -      |
| hsa-miR-432 | CDKN2B    | CDKN2B    | -      |
| hsa-miR-432 | CDNF      | CDNF      | -      |
| hsa-miR-432 | CDR2      | CDR2      | -      |
| hsa-miR-432 | CDRT4     | CDRT4     | -      |
| hsa-miR-432 | CDS2      | CDS2      | -      |
| hsa-miR-432 | CDYL      | CDYL      | -      |
| hsa-miR-432 | CELF2     | CELF2     | -      |
| hsa-miR-432 | CELSR2    | CELSR2    | -      |
| hsa-miR-432 | CENPA     | CENPA     | -      |
| hsa-miR-432 | CEP78     | CEP78     | -      |
| hsa-miR-432 | CETP      | CETP      | -      |
| hsa-miR-432 | CFLAR     | CFLAR     | -      |
| hsa-miR-432 | CGGBP1    | CGGBP1    | -      |
| hsa-miR-432 | CHFR      | -         | CHFR   |
| hsa-miR-432 | CHIC1     | CHIC1     | -      |
| hsa-miR-432 | CHKA      | CHKA      | -      |
| hsa-miR-432 | CHRD      | CHRD      | -      |
| hsa-miR-432 | CHRNA9    | -         | CHRNA9 |
| hsa-miR-432 | CISD3     | CISD3     | -      |
| hsa-miR-432 | CLDN5     | CLDN5     | -      |
| hsa-miR-432 | CLEC12B   | CLEC12B   | -      |
| hsa-miR-432 | CLEC3A    | CLEC3A    | -      |
| hsa-miR-432 | CLEC4M    | CLEC4M    | -      |
| hsa-miR-432 | CLEC5A    | CLEC5A    | -      |
| hsa-miR-432 | CLINT1    | CLINT1    | -      |
| hsa-miR-432 | CLIP4     | CLIP4     | -      |
| hsa-miR-432 | CMKLR1    | -         | CMKLR1 |
| hsa-miR-432 | CMTM3     | -         | CMTM3  |
| hsa-miR-432 | CNGA2     | CNGA2     | -      |
| hsa-miR-432 | CNGB3     | CNGB3     | -      |
| hsa-miR-432 | CNTD1     | CNTD1     | -      |
| hsa-miR-432 | CNTNAP3B  | CNTNAP3B  | -      |
| hsa-miR-432 | COL22A1   | COL22A1   | -      |
| hsa-miR-432 | COLQ      | COLQ      | -      |
| hsa-miR-432 | COMMD2    | -         | COMMD2 |
| hsa-miR-432 | COX10     | COX10     | -      |
| hsa-miR-432 | CPEB2     | CPEB2     | -      |
| hsa-miR-432 | CPT1B     | -         | CPT1B  |
| hsa-miR-432 | CREB5     | CREB5     | -      |
| hsa-miR-432 | CSDA      | CSDA      | -      |
| hsa-miR-432 | CTNND2    | CTNND2    | -      |
| hsa-miR-432 | CTTNBP2NL | CTTNBP2NL | -      |
| hsa-miR-432 | CUX2      | CUX2      | -      |
| hsa-miR-432 | CX3CL1    | CX3CL1    | -      |
| hsa-miR-432 | CXCR6     | CXCR6     | -      |
| hsa-miR-432 | CXorf1    | CXorf1    | -      |
| hsa-miR-432 | CYB5D1    | CYB5D1    | -      |
| hsa-miR-432 | CYBB      | CYBB      | -      |
| hsa-miR-432 | CYP19A1   | CYP19A1   | -      |
| hsa-miR-432 | CYP1B1    | CYP1B1    | -      |

|             |          |          |         |
|-------------|----------|----------|---------|
| hsa-miR-432 | CYP2U1   | CYP2U1   | -       |
| hsa-miR-432 | CYYR1    | CYYR1    | -       |
| hsa-miR-432 | DAB2IP   | DAB2IP   | -       |
| hsa-miR-432 | DAG1     | DAG1     | -       |
| hsa-miR-432 | DAZ1     | DAZ1     | -       |
| hsa-miR-432 | DAZ2     | DAZ2     | -       |
| hsa-miR-432 | DAZ3     | DAZ3     | -       |
| hsa-miR-432 | DAZ4     | DAZ4     | -       |
| hsa-miR-432 | DAZL     | DAZL     | -       |
| hsa-miR-432 | DBR1     | DBR1     | -       |
| hsa-miR-432 | DBX2     | DBX2     | -       |
| hsa-miR-432 | DCAF10   | DCAF10   | -       |
| hsa-miR-432 | DCAF12L1 | DCAF12L1 | -       |
| hsa-miR-432 | DCAF4    | DCAF4    | -       |
| hsa-miR-432 | DCLK3    | DCLK3    | -       |
| hsa-miR-432 | DCLRE1B  | DCLRE1B  | -       |
| hsa-miR-432 | DCP1A    | -        | DCP1A   |
| hsa-miR-432 | -        | DCTN3    | DCTN3   |
| hsa-miR-432 | DDI1     | DDI1     | -       |
| hsa-miR-432 | DDIT4    | DDIT4    | -       |
| hsa-miR-432 | DDX10    | DDX10    | -       |
| hsa-miR-432 | -        | DDX12    | DDX12   |
| hsa-miR-432 | DEFB110  | DEFB110  | -       |
| hsa-miR-432 | DEFB129  | DEFB129  | -       |
| hsa-miR-432 | DENND1C  | -        | DENND1C |
| hsa-miR-432 | DERL3    | DERL3    | -       |
| hsa-miR-432 | DFFA     | DFFA     | -       |
| hsa-miR-432 | DGKI     | DGKI     | -       |
| hsa-miR-432 | DHFR     | DHFR     | -       |
| hsa-miR-432 | DHFRL1   | DHFRL1   | -       |
| hsa-miR-432 | -        | DHRS9    | DHRS9   |
| hsa-miR-432 | DHRSX    | DHRSX    | -       |
| hsa-miR-432 | DIRAS2   | DIRAS2   | -       |
| hsa-miR-432 | DISC1    | DISC1    | -       |
| hsa-miR-432 | DIXDC1   | DIXDC1   | -       |
| hsa-miR-432 | DLC1     | DLC1     | -       |
| hsa-miR-432 | DLD      | DLD      | -       |
| hsa-miR-432 | DLEU7    | DLEU7    | -       |
| hsa-miR-432 | DLG1     | DLG1     | -       |
| hsa-miR-432 | DLX3     | DLX3     | -       |
| hsa-miR-432 | DNAJB2   | DNAJB2   | -       |
| hsa-miR-432 | DNAJB6   | DNAJB6   | -       |
| hsa-miR-432 | DNAJC16  | DNAJC16  | -       |
| hsa-miR-432 | DNAJC6   | DNAJC6   | -       |
| hsa-miR-432 | DNMBP    | DNMBP    | -       |
| hsa-miR-432 | DNMT3B   | DNMT3B   | -       |
| hsa-miR-432 | DOCK5    | DOCK5    | -       |
| hsa-miR-432 | DPY19L3  | DPY19L3  | -       |
| hsa-miR-432 | DPYSL3   | DPYSL3   | -       |
| hsa-miR-432 | DSC1     | DSC1     | -       |
| hsa-miR-432 | DSPP     | DSPP     | -       |

|             |          |          |         |
|-------------|----------|----------|---------|
| hsa-miR-432 | DST      | DST      | -       |
| hsa-miR-432 | DTNA     | DTNA     | -       |
| hsa-miR-432 | DTX3     | -        | DTX3    |
| hsa-miR-432 | -        | DULLARD  | DULLARD |
| hsa-miR-432 | DUSP19   | DUSP19   | -       |
| hsa-miR-432 | DUSP2    | DUSP2    | -       |
| hsa-miR-432 | DUSP26   | DUSP26   | -       |
| hsa-miR-432 | DYNC1I1  | DYNC1I1  | -       |
| hsa-miR-432 | E2F3     | E2F3     | -       |
| hsa-miR-432 | EARS2    | EARS2    | -       |
| hsa-miR-432 | EDA2R    | EDA2R    | -       |
| hsa-miR-432 | EDDM3A   | EDDM3A   | -       |
| hsa-miR-432 | EDN3     | EDN3     | -       |
| hsa-miR-432 | EFCAB2   | EFCAB2   | -       |
| hsa-miR-432 | EFHA2    | EFHA2    | -       |
| hsa-miR-432 | EFNA3    | -        | EFNA3   |
| hsa-miR-432 | EFNB3    | EFNB3    | -       |
| hsa-miR-432 | EGFLAM   | EGFLAM   | -       |
| hsa-miR-432 | EHD3     | EHD3     | -       |
| hsa-miR-432 | EHF      | EHF      | -       |
| hsa-miR-432 | EIF1AX   | EIF1AX   | -       |
| hsa-miR-432 | EIF2A    | EIF2A    | -       |
| hsa-miR-432 | EIF2C1   | EIF2C1   | -       |
| hsa-miR-432 | EIF2C4   | EIF2C4   | -       |
| hsa-miR-432 | EIF2S2   | EIF2S2   | -       |
| hsa-miR-432 | EIF3G    | EIF3G    | -       |
| hsa-miR-432 | EIF4EBP2 | EIF4EBP2 | -       |
| hsa-miR-432 | EIF4G3   | EIF4G3   | -       |
| hsa-miR-432 | ELF4     | ELF4     | -       |
| hsa-miR-432 | ELK1     | ELK1     | -       |
| hsa-miR-432 | ELMO2    | ELMO2    | -       |
| hsa-miR-432 | ELOVL6   | ELOVL6   | -       |
| hsa-miR-432 | EMB      | EMB      | -       |
| hsa-miR-432 | EML4     | EML4     | -       |
| hsa-miR-432 | EMP2     | EMP2     | -       |
| hsa-miR-432 | EMX2     | EMX2     | -       |
| hsa-miR-432 | ENC1     | ENC1     | -       |
| hsa-miR-432 | ENTPD3   | ENTPD3   | -       |
| hsa-miR-432 | EPAS1    | EPAS1    | -       |
| hsa-miR-432 | EPB41L4B | EPB41L4B | -       |
| hsa-miR-432 | EPN3     | EPN3     | -       |
| hsa-miR-432 | -        | ERCC5    | ERCC5   |
| hsa-miR-432 | ESYT1    | ESYT1    | -       |
| hsa-miR-432 | ESYT3    | ESYT3    | -       |
| hsa-miR-432 | ETV4     | -        | ETV4    |
| hsa-miR-432 | -        | EVI2B    | EVI2B   |
| hsa-miR-432 | EVI5     | EVI5     | -       |
| hsa-miR-432 | EYA2     | EYA2     | -       |
| hsa-miR-432 | -        | F10      | F10     |
| hsa-miR-432 | F7       | F7       | -       |
| hsa-miR-432 | FAM105A  | FAM105A  | -       |

|             |           |           |         |
|-------------|-----------|-----------|---------|
| hsa-miR-432 | FAM107B   | FAM107B   | -       |
| hsa-miR-432 | FAM108C1  | FAM108C1  | -       |
| hsa-miR-432 | FAM110A   | FAM110A   | -       |
| hsa-miR-432 | FAM114A2  | FAM114A2  | -       |
| hsa-miR-432 | FAM120AOS | FAM120AOS | -       |
| hsa-miR-432 | FAM123B   | FAM123B   | -       |
| hsa-miR-432 | FAM123C   | FAM123C   | -       |
| hsa-miR-432 | FAM125B   | FAM125B   | -       |
| hsa-miR-432 | FAM126B   | FAM126B   | -       |
| hsa-miR-432 | FAM134B   | FAM134B   | -       |
| hsa-miR-432 | FAM136A   | FAM136A   | -       |
| hsa-miR-432 | FAM149A   | FAM149A   | -       |
| hsa-miR-432 | FAM153A   | FAM153A   | -       |
| hsa-miR-432 | FAM153C   | FAM153C   | -       |
| hsa-miR-432 | FAM163A   | FAM163A   | -       |
| hsa-miR-432 | FAM171A1  | FAM171A1  | -       |
| hsa-miR-432 | FAM175B   | FAM175B   | -       |
| hsa-miR-432 | FAM178A   | FAM178A   | -       |
| hsa-miR-432 | FAM180B   | FAM180B   | -       |
| hsa-miR-432 | FAM190A   | FAM190A   | -       |
| hsa-miR-432 | FAM190B   | FAM190B   | -       |
| hsa-miR-432 | FAM196B   | FAM196B   | -       |
| hsa-miR-432 | FAM198B   | FAM198B   | -       |
| hsa-miR-432 | FAM19A1   | -         | FAM19A1 |
| hsa-miR-432 | FAM20A    | FAM20A    | -       |
| hsa-miR-432 | FAM21A    | FAM21A    | -       |
| hsa-miR-432 | FAM21B    | FAM21B    | -       |
| hsa-miR-432 | FAM21C    | FAM21C    | -       |
| hsa-miR-432 | FAM26E    | FAM26E    | -       |
| hsa-miR-432 | FAM63B    | FAM63B    | -       |
| hsa-miR-432 | FAM65C    | FAM65C    | -       |
| hsa-miR-432 | FAM69B    | -         | FAM69B  |
| hsa-miR-432 | FAM86A    | FAM86A    | -       |
| hsa-miR-432 | FAM86B1   | FAM86B1   | -       |
| hsa-miR-432 | FAT1      | FAT1      | -       |
| hsa-miR-432 | FBLN1     | FBLN1     | -       |
| hsa-miR-432 | FBXL12    | FBXL12    | -       |
| hsa-miR-432 | FBXL3     | FBXL3     | -       |
| hsa-miR-432 | FBXL7     | FBXL7     | -       |
| hsa-miR-432 | FBXW7     | FBXW7     | -       |
| hsa-miR-432 | FCGR1A    | FCGR1A    | -       |
| hsa-miR-432 | FCGR3A    | FCGR3A    | -       |
| hsa-miR-432 | FCHO2     | FCHO2     | -       |
| hsa-miR-432 | -         | FCRL6     | FCRL6   |
| hsa-miR-432 | FEM1A     | -         | FEM1A   |
| hsa-miR-432 | FER1L6    | FER1L6    | -       |
| hsa-miR-432 | FEZ2      | FEZ2      | -       |
| hsa-miR-432 | FGB       | FGB       | -       |
| hsa-miR-432 | FGD4      | FGD4      | -       |
| hsa-miR-432 | FGD6      | FGD6      | -       |
| hsa-miR-432 | -         | FGF20     | FGF20   |



|             |         |         |        |
|-------------|---------|---------|--------|
| hsa-miR-432 | FGFBP3  | FGFBP3  | -      |
| hsa-miR-432 | FIP1L1  | FIP1L1  | -      |
| hsa-miR-432 | FKBP14  | FKBP14  | -      |
| hsa-miR-432 | FKBP15  | FKBP15  | -      |
| hsa-miR-432 | FKBP7   | FKBP7   | -      |
| hsa-miR-432 | FLG     | FLG     | -      |
| hsa-miR-432 | FLG2    | FLG2    | -      |
| hsa-miR-432 | -       | FMN2    | FMN2   |
| hsa-miR-432 | FN1     | FN1     | -      |
| hsa-miR-432 | FNTB    | FNTB    | -      |
| hsa-miR-432 | FOS     | FOS     | -      |
| hsa-miR-432 | FOSL2   | FOSL2   | -      |
| hsa-miR-432 | FOXD2   | FOXD2   | -      |
| hsa-miR-432 | FOXM1   | FOXM1   | -      |
| hsa-miR-432 | FOXN2   | FOXN2   | -      |
| hsa-miR-432 | FPGT    | FPGT    | -      |
| hsa-miR-432 | FRAS1   | FRAS1   | -      |
| hsa-miR-432 | FRAT2   | FRAT2   | -      |
| hsa-miR-432 | FRMD4B  | FRMD4B  | -      |
| hsa-miR-432 | FRMPD4  | FRMPD4  | -      |
| hsa-miR-432 | FRYL    | FRYL    | -      |
| hsa-miR-432 | FSCN3   | FSCN3   | -      |
| hsa-miR-432 | FSTL4   | FSTL4   | -      |
| hsa-miR-432 | FUBP1   | FUBP1   | -      |
| hsa-miR-432 | FUBP3   | FUBP3   | -      |
| hsa-miR-432 | FURIN   | FURIN   | -      |
| hsa-miR-432 | FXYD3   | FXYD3   | -      |
| hsa-miR-432 | FYCO1   | FYCO1   | -      |
| hsa-miR-432 | FZD5    | -       | FZD5   |
| hsa-miR-432 | GAB1    | GAB1    | -      |
| hsa-miR-432 | GABRR2  | -       | GABRR2 |
| hsa-miR-432 | GAD1    | GAD1    | -      |
| hsa-miR-432 | GALK2   | GALK2   | -      |
| hsa-miR-432 | GALNT1  | GALNT1  | -      |
| hsa-miR-432 | GALNTL2 | GALNTL2 | -      |
| hsa-miR-432 | GAN     | GAN     | -      |
| hsa-miR-432 | GATS    | GATS    | -      |
| hsa-miR-432 | GATSL3  | GATSL3  | -      |
| hsa-miR-432 | GCHFR   | -       | GCHFR  |
| hsa-miR-432 | GCNT4   | GCNT4   | -      |
| hsa-miR-432 | GDA     | GDA     | -      |
| hsa-miR-432 | GFRAL   | GFRAL   | -      |
| hsa-miR-432 | GGA3    | GGA3    | -      |
| hsa-miR-432 | GGT5    | GGT5    | -      |
| hsa-miR-432 | GHR     | GHR     | -      |
| hsa-miR-432 | GIGYF2  | GIGYF2  | -      |
| hsa-miR-432 | GIMAP4  | GIMAP4  | -      |
| hsa-miR-432 | GIPR    | GIPR    | -      |
| hsa-miR-432 | GIT2    | GIT2    | -      |
| hsa-miR-432 | GK      | GK      | -      |
| hsa-miR-432 | GLDN    | GLDN    | -      |

|             |           |           |        |
|-------------|-----------|-----------|--------|
| hsa-miR-432 | GLRA2     | GLRA2     | -      |
| hsa-miR-432 | GLYAT     | GLYAT     | -      |
| hsa-miR-432 | GNA12     | GNA12     | -      |
| hsa-miR-432 | GNG12     | GNG12     | -      |
| hsa-miR-432 | GNG2      | GNG2      | -      |
| hsa-miR-432 | GNL3L     | -         | GNL3L  |
| hsa-miR-432 | GOSR2     | GOSR2     | -      |
| hsa-miR-432 | GPAM      | GPAM      | -      |
| hsa-miR-432 | -         | GPC5      | GPC5   |
| hsa-miR-432 | GPCPD1    | GPCPD1    | -      |
| hsa-miR-432 | GPD1L     | GPD1L     | -      |
| hsa-miR-432 | GPR114    | GPR114    | -      |
| hsa-miR-432 | GPR160    | GPR160    | -      |
| hsa-miR-432 | -         | GPR174    | GPR174 |
| hsa-miR-432 | GPR4      | GPR4      | -      |
| hsa-miR-432 | GPR56     | GPR56     | -      |
| hsa-miR-432 | GPR68     | GPR68     | -      |
| hsa-miR-432 | -         | GPR98     | GPR98  |
| hsa-miR-432 | GPX8      | GPX8      | -      |
| hsa-miR-432 | GRAMD2    | GRAMD2    | -      |
| hsa-miR-432 | GRHL1     | GRHL1     | -      |
| hsa-miR-432 | GRIA2     | GRIA2     | -      |
| hsa-miR-432 | -         | GRIA3     | GRIA3  |
| hsa-miR-432 | GRM7      | GRM7      | -      |
| hsa-miR-432 | GRPR      | GRPR      | -      |
| hsa-miR-432 | GSK3B     | GSK3B     | -      |
| hsa-miR-432 | GSTA1     | GSTA1     | -      |
| hsa-miR-432 | GSTA2     | GSTA2     | -      |
| hsa-miR-432 | GSTM3     | GSTM3     | -      |
| hsa-miR-432 | GTF3C3    | GTF3C3    | -      |
| hsa-miR-432 | HACE1     | HACE1     | -      |
| hsa-miR-432 | HAUS2     | HAUS2     | -      |
| hsa-miR-432 | HCFC2     | HCFC2     | -      |
| hsa-miR-432 | HDGF      | HDGF      | -      |
| hsa-miR-432 | HEATR5A   | HEATR5A   | -      |
| hsa-miR-432 | HEATR7A   | HEATR7A   | -      |
| hsa-miR-432 | HEG1      | HEG1      | -      |
| hsa-miR-432 | HEPH      | HEPH      | -      |
| hsa-miR-432 | HERC3     | HERC3     | -      |
| hsa-miR-432 | HEXA      | HEXA      | -      |
| hsa-miR-432 | HEY1      | HEY1      | -      |
| hsa-miR-432 | HGFAC     | HGFAC     | -      |
| hsa-miR-432 | HHLA1     | HHLA1     | -      |
| hsa-miR-432 | HIF3A     | HIF3A     | -      |
| hsa-miR-432 | HIST2H2BF | HIST2H2BF | -      |
| hsa-miR-432 | HLA-DQA1  | HLA-DQA1  | -      |
| hsa-miR-432 | HLA-G     | HLA-G     | -      |
| hsa-miR-432 | HMG20A    | HMG20A    | -      |
| hsa-miR-432 | HMGA2     | HMGA2     | -      |
| hsa-miR-432 | HMGCLL1   | HMGCLL1   | -      |
| hsa-miR-432 | HOXA5     | HOXA5     | -      |

|             |          |          |        |
|-------------|----------|----------|--------|
| hsa-miR-432 | HOXC6    | HOXC6    | -      |
| hsa-miR-432 | HOXD13   | HOXD13   | -      |
| hsa-miR-432 | HPGD     | HPGD     | -      |
| hsa-miR-432 | HRCT1    | HRCT1    | -      |
| hsa-miR-432 | HRH2     | HRH2     | -      |
| hsa-miR-432 | HS3ST4   | HS3ST4   | -      |
| hsa-miR-432 | HSD17B11 | HSD17B11 | -      |
| hsa-miR-432 | HSP90AA1 | HSP90AA1 | -      |
| hsa-miR-432 | HSPH1    | HSPH1    | -      |
| hsa-miR-432 | HTRA1    | HTRA1    | -      |
| hsa-miR-432 | HYOU1    | HYOU1    | -      |
| hsa-miR-432 | IDH3A    | IDH3A    | -      |
| hsa-miR-432 | IDI2     | IDI2     | -      |
| hsa-miR-432 | IDO2     | IDO2     | -      |
| hsa-miR-432 | IFNAR2   | IFNAR2   | -      |
| hsa-miR-432 | IGF1R    | IGF1R    | -      |
| hsa-miR-432 | IGF2BP3  | IGF2BP3  | -      |
| hsa-miR-432 | IGSF8    | -        | IGSF8  |
| hsa-miR-432 | IKBKB    | IKBKB    | -      |
| hsa-miR-432 | IKZF3    | IKZF3    | -      |
| hsa-miR-432 | IL11     | IL11     | -      |
| hsa-miR-432 | -        | IL11RA   | IL11RA |
| hsa-miR-432 | -        | IL17RC   | IL17RC |
| hsa-miR-432 | IL7      | IL7      | -      |
| hsa-miR-432 | IMPACT   | IMPACT   | -      |
| hsa-miR-432 | INADL    | INADL    | -      |
| hsa-miR-432 | INCENP   | INCENP   | -      |
| hsa-miR-432 | INO80C   | INO80C   | -      |
| hsa-miR-432 | INSR     | INSR     | -      |
| hsa-miR-432 | IQGAP1   | IQGAP1   | -      |
| hsa-miR-432 | IRAK4    | IRAK4    | -      |
| hsa-miR-432 | ITFG2    | ITFG2    | -      |
| hsa-miR-432 | ITGA2    | ITGA2    | -      |
| hsa-miR-432 | ITGA5    | -        | ITGA5  |
| hsa-miR-432 | ITK      | ITK      | -      |
| hsa-miR-432 | ITM2C    | ITM2C    | -      |
| hsa-miR-432 | ITPR1    | ITPR1    | -      |
| hsa-miR-432 | ITPR3    | ITPR3    | -      |
| hsa-miR-432 | JAKMIP3  | JAKMIP3  | -      |
| hsa-miR-432 | JHDM1D   | JHDM1D   | -      |
| hsa-miR-432 | JMJD6    | JMJD6    | -      |
| hsa-miR-432 | JPH4     | JPH4     | -      |
| hsa-miR-432 | KAT5     | KAT5     | -      |
| hsa-miR-432 | KAZALD1  | KAZALD1  | -      |
| hsa-miR-432 | KCNA3    | KCNA3    | -      |
| hsa-miR-432 | KCNA5    | KCNA5    | -      |
| hsa-miR-432 | KCNAB2   | KCNAB2   | -      |
| hsa-miR-432 | KCNE4    | KCNE4    | -      |
| hsa-miR-432 | KCNIP1   | KCNIP1   | -      |
| hsa-miR-432 | KCNIP2   | KCNIP2   | -      |
| hsa-miR-432 | KCNIP3   | KCNIP3   | -      |

|             |           |           |       |
|-------------|-----------|-----------|-------|
| hsa-miR-432 | KCNJ11    | KCNJ11    | -     |
| hsa-miR-432 | KCNJ16    | KCNJ16    | -     |
| hsa-miR-432 | KCTD12    | KCTD12    | -     |
| hsa-miR-432 | KCTD14    | KCTD14    | -     |
| hsa-miR-432 | KCTD15    | KCTD15    | -     |
| hsa-miR-432 | KCTD2     | KCTD2     | -     |
| hsa-miR-432 | KCTD3     | KCTD3     | -     |
| hsa-miR-432 | KDEL3     | KDEL3     | -     |
| hsa-miR-432 | KDM3B     | KDM3B     | -     |
| hsa-miR-432 | KDM5A     | KDM5A     | -     |
| hsa-miR-432 | KEAP1     | KEAP1     | -     |
| hsa-miR-432 | KIAA0040  | KIAA0040  | -     |
| hsa-miR-432 | KIAA0226  | KIAA0226  | -     |
| hsa-miR-432 | KIAA0232  | KIAA0232  | -     |
| hsa-miR-432 | KIAA0319  | KIAA0319  | -     |
| hsa-miR-432 | KIAA0368  | KIAA0368  | -     |
| hsa-miR-432 | KIAA1045  | KIAA1045  | -     |
| hsa-miR-432 | KIAA1199  | KIAA1199  | -     |
| hsa-miR-432 | KIAA1210  | KIAA1210  | -     |
| hsa-miR-432 | KIAA1486  | KIAA1486  | -     |
| hsa-miR-432 | KIAA1522  | KIAA1522  | -     |
| hsa-miR-432 | KIAA1549  | KIAA1549  | -     |
| hsa-miR-432 | KIF11     | KIF11     | -     |
| hsa-miR-432 | KIF16B    | KIF16B    | -     |
| hsa-miR-432 | KIF9      | -         | KIF9  |
| hsa-miR-432 | KLF11     | KLF11     | -     |
| hsa-miR-432 | KLHL20    | KLHL20    | -     |
| hsa-miR-432 | KLHL25    | KLHL25    | -     |
| hsa-miR-432 | KLHL28    | KLHL28    | -     |
| hsa-miR-432 | KLHL7     | -         | KLHL7 |
| hsa-miR-432 | KLK2      | KLK2      | -     |
| hsa-miR-432 | KLRK1     | KLRK1     | -     |
| hsa-miR-432 | KMO       | KMO       | -     |
| hsa-miR-432 | KNCN      | KNCN      | -     |
| hsa-miR-432 | KNDC1     | KNDC1     | -     |
| hsa-miR-432 | KPRP      | KPRP      | -     |
| hsa-miR-432 | KRR1      | KRR1      | -     |
| hsa-miR-432 | KRT10     | KRT10     | -     |
| hsa-miR-432 | -         | KRT37     | KRT37 |
| hsa-miR-432 | KRT77     | KRT77     | -     |
| hsa-miR-432 | KRTAP10-7 | KRTAP10-7 | -     |
| hsa-miR-432 | KRTAP19-6 | KRTAP19-6 | -     |
| hsa-miR-432 | L3MBTL2   | L3MBTL2   | -     |
| hsa-miR-432 | LANCL1    | LANCL1    | -     |
| hsa-miR-432 | LANCL3    | LANCL3    | -     |
| hsa-miR-432 | LARP1B    | LARP1B    | -     |
| hsa-miR-432 | LARP4B    | LARP4B    | -     |
| hsa-miR-432 | LASP1     | LASP1     | -     |
| hsa-miR-432 | LCOR      | LCOR      | -     |
| hsa-miR-432 | LDB3      | LDB3      | -     |
| hsa-miR-432 | LENG9     | LENG9     | -     |

|             |              |              |        |
|-------------|--------------|--------------|--------|
| hsa-miR-432 | LEP          | LEP          | -      |
| hsa-miR-432 | LEPROTL1     | LEPROTL1     | -      |
| hsa-miR-432 | LHFPL3       | LHFPL3       | -      |
| hsa-miR-432 | LHX3         | LHX3         | -      |
| hsa-miR-432 | LILRA6       | LILRA6       | -      |
| hsa-miR-432 | LIMCH1       | LIMCH1       | -      |
| hsa-miR-432 | LIPA         | LIPA         | -      |
| hsa-miR-432 | LNP1         | LNP1         | -      |
| hsa-miR-432 | LOC100287036 | LOC100287036 | -      |
| hsa-miR-432 | LOC100329135 | LOC100329135 | -      |
| hsa-miR-432 | LOC253044    | LOC253044    | -      |
| hsa-miR-432 | LPL          | LPL          | -      |
| hsa-miR-432 | LPP          | LPP          | -      |
| hsa-miR-432 | LRCH1        | LRCH1        | -      |
| hsa-miR-432 | LRFN4        | -            | LRFN4  |
| hsa-miR-432 | LRP6         | LRP6         | -      |
| hsa-miR-432 | LRPPRC       | LRPPRC       | -      |
| hsa-miR-432 | LRRC1        | LRRC1        | -      |
| hsa-miR-432 | LRRC20       | LRRC20       | -      |
| hsa-miR-432 | LRRC59       | LRRC59       | -      |
| hsa-miR-432 | LRRK1        | LRRK1        | -      |
| hsa-miR-432 | LRRTM3       | LRRTM3       | -      |
| hsa-miR-432 | LY75         | LY75         | -      |
| hsa-miR-432 | LY9          | LY9          | -      |
| hsa-miR-432 | LYPD5        | LYPD5        | -      |
| hsa-miR-432 | LYRM2        | LYRM2        | -      |
| hsa-miR-432 | LYZL6        | -            | LYZL6  |
| hsa-miR-432 | MAGI1        | MAGI1        | -      |
| hsa-miR-432 | MAN1A2       | MAN1A2       | -      |
| hsa-miR-432 | MAN2B1       | -            | MAN2B1 |
| hsa-miR-432 | MAP1LC3B     | MAP1LC3B     | -      |
| hsa-miR-432 | MAP1LC3B2    | MAP1LC3B2    | -      |
| hsa-miR-432 | MAP2         | MAP2         | -      |
| hsa-miR-432 | MAP3K3       | MAP3K3       | -      |
| hsa-miR-432 | MAPRE2       | MAPRE2       | -      |
| hsa-miR-432 | MAPT         | MAPT         | -      |
| hsa-miR-432 | MARCH1       | MARCH1       | -      |
| hsa-miR-432 | MARCH3       | MARCH3       | -      |
| hsa-miR-432 | MARCKS       | MARCKS       | -      |
| hsa-miR-432 | MARK2        | MARK2        | -      |
| hsa-miR-432 | MASP1        | MASP1        | -      |
| hsa-miR-432 | MAST4        | MAST4        | -      |
| hsa-miR-432 | MATN1        | MATN1        | -      |
| hsa-miR-432 | MBNL2        | MBNL2        | -      |
| hsa-miR-432 | MBOAT1       | MBOAT1       | -      |
| hsa-miR-432 | MBTPS2       | MBTPS2       | -      |
| hsa-miR-432 | MCHR1        | MCHR1        | -      |
| hsa-miR-432 | MCL1         | MCL1         | -      |
| hsa-miR-432 | MCM2         | MCM2         | -      |
| hsa-miR-432 | MCPH1        | MCPH1        | -      |
| hsa-miR-432 | MDM4         | MDM4         | -      |

|             |         |         |        |
|-------------|---------|---------|--------|
| hsa-miR-432 | MEGF9   | MEGF9   | -      |
| hsa-miR-432 | MEN1    | MEN1    | -      |
| hsa-miR-432 | MEP1A   | MEP1A   | -      |
| hsa-miR-432 | METTL13 | METTL13 | -      |
| hsa-miR-432 | METTL7B | METTL7B | -      |
| hsa-miR-432 | MFHAS1  | MFHAS1  | -      |
| hsa-miR-432 | MFSD10  | MFSD10  | -      |
| hsa-miR-432 | -       | MIA     | MIA    |
| hsa-miR-432 | -       | MICAL2  | MICAL2 |
| hsa-miR-432 | MID2    | MID2    | -      |
| hsa-miR-432 | MLEC    | MLEC    | -      |
| hsa-miR-432 | MLF1    | MLF1    | -      |
| hsa-miR-432 | -       | MLLT11  | MLLT11 |
| hsa-miR-432 | MLLT3   | MLLT3   | -      |
| hsa-miR-432 | MLLT4   | MLLT4   | -      |
| hsa-miR-432 | MLLT6   | MLLT6   | -      |
| hsa-miR-432 | MLPH    | MLPH    | -      |
| hsa-miR-432 | MMEL1   | MMEL1   | -      |
| hsa-miR-432 | MMP8    | MMP8    | -      |
| hsa-miR-432 | MNT     | MNT     | -      |
| hsa-miR-432 | MOBKL2C | MOBKL2C | -      |
| hsa-miR-432 | MOBP    | MOBP    | -      |
| hsa-miR-432 | MON2    | MON2    | -      |
| hsa-miR-432 | MOV10   | -       | MOV10  |
| hsa-miR-432 | MPP5    | MPP5    | -      |
| hsa-miR-432 | MPP7    | MPP7    | -      |
| hsa-miR-432 | MPZL2   | MPZL2   | -      |
| hsa-miR-432 | MRPL9   | MRPL9   | -      |
| hsa-miR-432 | MSL2    | MSL2    | -      |
| hsa-miR-432 | -       | MTA1    | MTA1   |
| hsa-miR-432 | MTCH2   | MTCH2   | -      |
| hsa-miR-432 | MTL5    | MTL5    | -      |
| hsa-miR-432 | MTMR12  | MTMR12  | -      |
| hsa-miR-432 | MTMR2   | MTMR2   | -      |
| hsa-miR-432 | MTMR4   | MTMR4   | -      |
| hsa-miR-432 | MTPN    | MTPN    | -      |
| hsa-miR-432 | MTR     | MTR     | -      |
| hsa-miR-432 | MTX3    | MTX3    | -      |
| hsa-miR-432 | MUTED   | MUTED   | -      |
| hsa-miR-432 | MXD3    | MXD3    | -      |
| hsa-miR-432 | MXI1    | MXI1    | -      |
| hsa-miR-432 | MYLIP   | MYLIP   | -      |
| hsa-miR-432 | MYLK    | MYLK    | -      |
| hsa-miR-432 | -       | MYO18B  | MYO18B |
| hsa-miR-432 | MYO19   | MYO19   | -      |
| hsa-miR-432 | MYO1B   | MYO1B   | -      |
| hsa-miR-432 | MYO1D   | MYO1D   | -      |
| hsa-miR-432 | MYO1E   | MYO1E   | -      |
| hsa-miR-432 | MYO5B   | MYO5B   | -      |
| hsa-miR-432 | MYOC    | MYOC    | -      |
| hsa-miR-432 | MYOZ3   | MYOZ3   | -      |

|             |          |          |       |
|-------------|----------|----------|-------|
| hsa-miR-432 | MYRIP    | MYRIP    | -     |
| hsa-miR-432 | -        | MYST1    | MYST1 |
| hsa-miR-432 | N4BP2L1  | N4BP2L1  | -     |
| hsa-miR-432 | NAAA     | NAAA     | -     |
| hsa-miR-432 | NAALADL2 | NAALADL2 | -     |
| hsa-miR-432 | NAGK     | -        | NAGK  |
| hsa-miR-432 | -        | NALCN    | NALCN |
| hsa-miR-432 | NAP1L1   | NAP1L1   | -     |
| hsa-miR-432 | NAPEPLD  | NAPEPLD  | -     |
| hsa-miR-432 | NCAPG    | NCAPG    | -     |
| hsa-miR-432 | NCAPG2   | NCAPG2   | -     |
| hsa-miR-432 | NCL      | -        | NCL   |
| hsa-miR-432 | NCOA1    | NCOA1    | -     |
| hsa-miR-432 | NDUFA11  | NDUFA11  | -     |
| hsa-miR-432 | NECAB3   | NECAB3   | -     |
| hsa-miR-432 | NEDD4L   | NEDD4L   | -     |
| hsa-miR-432 | NEUROD1  | NEUROD1  | -     |
| hsa-miR-432 | NFAT5    | NFAT5    | -     |
| hsa-miR-432 | NHLH1    | NHLH1    | -     |
| hsa-miR-432 | NID2     | NID2     | -     |
| hsa-miR-432 | NIPAL4   | NIPAL4   | -     |
| hsa-miR-432 | NIT2     | NIT2     | -     |
| hsa-miR-432 | NKX3-1   | NKX3-1   | -     |
| hsa-miR-432 | NLRC3    | NLRC3    | -     |
| hsa-miR-432 | NLRX1    | NLRX1    | -     |
| hsa-miR-432 | NMNAT2   | NMNAT2   | -     |
| hsa-miR-432 | NMT1     | NMT1     | -     |
| hsa-miR-432 | NOD1     | NOD1     | -     |
| hsa-miR-432 | NOL10    | NOL10    | -     |
| hsa-miR-432 | NOV      | NOV      | -     |
| hsa-miR-432 | NOX5     | NOX5     | -     |
| hsa-miR-432 | NPAS2    | NPAS2    | -     |
| hsa-miR-432 | NPTX2    | NPTX2    | -     |
| hsa-miR-432 | -        | NPY6R    | NPY6R |
| hsa-miR-432 | -        | NR1I3    | NR1I3 |
| hsa-miR-432 | NR2F2    | NR2F2    | -     |
| hsa-miR-432 | NR5A2    | NR5A2    | -     |
| hsa-miR-432 | NRCAM    | NRCAM    | -     |
| hsa-miR-432 | NRG1     | NRG1     | -     |
| hsa-miR-432 | NRK      | NRK      | -     |
| hsa-miR-432 | NRSN2    | -        | NRSN2 |
| hsa-miR-432 | NRXN3    | NRXN3    | -     |
| hsa-miR-432 | NSMAF    | NSMAF    | -     |
| hsa-miR-432 | NT5C2    | NT5C2    | -     |
| hsa-miR-432 | NT5C3    | NT5C3    | -     |
| hsa-miR-432 | NTRK2    | NTRK2    | -     |
| hsa-miR-432 | NUB1     | NUB1     | -     |
| hsa-miR-432 | NUDT10   | NUDT10   | -     |
| hsa-miR-432 | NUP62    | NUP62    | -     |
| hsa-miR-432 | NUS1     | NUS1     | -     |
| hsa-miR-432 | OAS2     | OAS2     | -     |

|             |         |         |         |
|-------------|---------|---------|---------|
| hsa-miR-432 | OCRL    | OCRL    | -       |
| hsa-miR-432 | -       | OGFOD2  | OGFOD2  |
| hsa-miR-432 | OLFML1  | OLFML1  | -       |
| hsa-miR-432 | OLFML2B | OLFML2B | -       |
| hsa-miR-432 | OPA3    | -       | OPA3    |
| hsa-miR-432 | OPCML   | OPCML   | -       |
| hsa-miR-432 | OPRK1   | OPRK1   | -       |
| hsa-miR-432 | OPTN    | OPTN    | -       |
| hsa-miR-432 | OR13A1  | -       | OR13A1  |
| hsa-miR-432 | OR2H1   | OR2H1   | -       |
| hsa-miR-432 | OR7D2   | OR7D2   | -       |
| hsa-miR-432 | OSBPL10 | OSBPL10 | -       |
| hsa-miR-432 | OSBPL2  | OSBPL2  | -       |
| hsa-miR-432 | OTP     | OTP     | -       |
| hsa-miR-432 | P2RX1   | P2RX1   | -       |
| hsa-miR-432 | P2RY1   | P2RY1   | -       |
| hsa-miR-432 | PABPC4L | PABPC4L | -       |
| hsa-miR-432 | PAN3    | PAN3    | -       |
| hsa-miR-432 | PANK3   | PANK3   | -       |
| hsa-miR-432 | PAPD4   | PAPD4   | -       |
| hsa-miR-432 | PAPOLA  | PAPOLA  | -       |
| hsa-miR-432 | PAQR4   | PAQR4   | -       |
| hsa-miR-432 | PARP9   | PARP9   | -       |
| hsa-miR-432 | PATZ1   | PATZ1   | -       |
| hsa-miR-432 | PAX5    | PAX5    | -       |
| hsa-miR-432 | PAX8    | PAX8    | -       |
| hsa-miR-432 | PCDH15  | PCDH15  | -       |
| hsa-miR-432 | PCDH18  | PCDH18  | -       |
| hsa-miR-432 | PCGF3   | PCGF3   | -       |
| hsa-miR-432 | PCIF1   | PCIF1   | -       |
| hsa-miR-432 | PCLO    | PCLO    | -       |
| hsa-miR-432 | PCNT    | -       | PCNT    |
| hsa-miR-432 | PCP4L1  | PCP4L1  | -       |
| hsa-miR-432 | PCSK2   | PCSK2   | -       |
| hsa-miR-432 | PDAP1   | PDAP1   | -       |
| hsa-miR-432 | PDE12   | PDE12   | -       |
| hsa-miR-432 | PDE1B   | PDE1B   | -       |
| hsa-miR-432 | PDE4A   | PDE4A   | -       |
| hsa-miR-432 | PDE4DIP | PDE4DIP | -       |
| hsa-miR-432 | PDGFB   | PDGFB   | -       |
| hsa-miR-432 | PDS5B   | PDS5B   | -       |
| hsa-miR-432 | -       | PDXDC1  | PDXDC1  |
| hsa-miR-432 | PDZD2   | PDZD2   | -       |
| hsa-miR-432 | -       | PDZK1   | PDZK1   |
| hsa-miR-432 | PELI2   | PELI2   | -       |
| hsa-miR-432 | PFDN1   | PFDN1   | -       |
| hsa-miR-432 | -       | PFKFB3  | PFKFB3  |
| hsa-miR-432 | PGBD4   | PGBD4   | -       |
| hsa-miR-432 | PGLYRP4 | -       | PGLYRP4 |
| hsa-miR-432 | PHC1    | PHC1    | -       |
| hsa-miR-432 | PHF20L1 | PHF20L1 | -       |



|             |          |          |          |
|-------------|----------|----------|----------|
| hsa-miR-432 | PHLPP2   | PHLPP2   | -        |
| hsa-miR-432 | PHOX2B   | PHOX2B   | -        |
| hsa-miR-432 | PIGS     | PIGS     | -        |
| hsa-miR-432 | PIK3R3   | PIK3R3   | -        |
| hsa-miR-432 | PIKFYVE  | PIKFYVE  | -        |
| hsa-miR-432 | PIN4     | PIN4     | -        |
| hsa-miR-432 | PIRT     | PIRT     | -        |
| hsa-miR-432 | PITPNC1  | PITPNC1  | -        |
| hsa-miR-432 | PKNOX2   | PKNOX2   | -        |
| hsa-miR-432 | PLAGL2   | PLAGL2   | -        |
| hsa-miR-432 | PLCB3    | PLCB3    | -        |
| hsa-miR-432 | PLCG1    | PLCG1    | -        |
| hsa-miR-432 | PLD5     | PLD5     | -        |
| hsa-miR-432 | PLK3     | PLK3     | -        |
| hsa-miR-432 | PMP22    | PMP22    | -        |
| hsa-miR-432 | PMVK     | -        | PMVK     |
| hsa-miR-432 | PNKD     | PNKD     | -        |
| hsa-miR-432 | POLDIP2  | POLDIP2  | -        |
| hsa-miR-432 | POLE3    | POLE3    | -        |
| hsa-miR-432 | POLH     | POLH     | -        |
| hsa-miR-432 | POLI     | POLI     | -        |
| hsa-miR-432 | POLK     | POLK     | -        |
| hsa-miR-432 | POLR1A   | -        | POLR1A   |
| hsa-miR-432 | POLR1D   | POLR1D   | -        |
| hsa-miR-432 | POLR2D   | POLR2D   | -        |
| hsa-miR-432 | PPA2     | PPA2     | -        |
| hsa-miR-432 | PPAPDC2  | PPAPDC2  | -        |
| hsa-miR-432 | PPDPF    | PPDPF    | -        |
| hsa-miR-432 | PPM1L    | PPM1L    | -        |
| hsa-miR-432 | PPP1R12B | -        | PPP1R12B |
| hsa-miR-432 | PPP1R13B | PPP1R13B | -        |
| hsa-miR-432 | PPP1R3G  | PPP1R3G  | -        |
| hsa-miR-432 | PPP1R8   | PPP1R8   | -        |
| hsa-miR-432 | PPP1R9A  | -        | PPP1R9A  |
| hsa-miR-432 | PPP2R2D  | PPP2R2D  | -        |
| hsa-miR-432 | PPP2R3A  | PPP2R3A  | -        |
| hsa-miR-432 | PPP4R4   | PPP4R4   | -        |
| hsa-miR-432 | -        | PRIM1    | PRIM1    |
| hsa-miR-432 | PRKCB    | PRKCB    | -        |
| hsa-miR-432 | PRPH2    | PRPH2    | -        |
| hsa-miR-432 | PRR15    | PRR15    | -        |
| hsa-miR-432 | PRR23A   | PRR23A   | -        |
| hsa-miR-432 | PRR23B   | PRR23B   | -        |
| hsa-miR-432 | PRRC1    | PRRC1    | -        |
| hsa-miR-432 | PRRG1    | PRRG1    | -        |
| hsa-miR-432 | PRRT4    | PRRT4    | -        |
| hsa-miR-432 | PSAPL1   | -        | PSAPL1   |
| hsa-miR-432 | PSD4     | PSD4     | -        |
| hsa-miR-432 | PSEN1    | PSEN1    | -        |
| hsa-miR-432 | PTCD3    | PTCD3    | -        |
| hsa-miR-432 | PTCHD1   | PTCHD1   | -        |

|             |          |          |          |
|-------------|----------|----------|----------|
| hsa-miR-432 | PTGDR    | PTGDR    | -        |
| hsa-miR-432 | PTOV1    | -        | PTOV1    |
| hsa-miR-432 | PTPN18   | PTPN18   | -        |
| hsa-miR-432 | PTPN3    | PTPN3    | -        |
| hsa-miR-432 | PTPN7    | PTPN7    | -        |
| hsa-miR-432 | PTPRB    | PTPRB    | -        |
| hsa-miR-432 | PTPRF    | PTPRF    | -        |
| hsa-miR-432 | PTPRJ    | PTPRJ    | -        |
| hsa-miR-432 | PURA     | PURA     | -        |
| hsa-miR-432 | PVR      | PVR      | -        |
| hsa-miR-432 | PWWP2A   | PWWP2A   | -        |
| hsa-miR-432 | PWWP2B   | PWWP2B   | -        |
| hsa-miR-432 | QSER1    | QSER1    | -        |
| hsa-miR-432 | QSOX1    | QSOX1    | -        |
| hsa-miR-432 | QSOX2    | QSOX2    | -        |
| hsa-miR-432 | RAB28    | RAB28    | -        |
| hsa-miR-432 | RAB37    | -        | RAB37    |
| hsa-miR-432 | RAB3D    | RAB3D    | -        |
| hsa-miR-432 | RABEP1   | RABEP1   | -        |
| hsa-miR-432 | RABGAP1L | -        | RABGAP1L |
| hsa-miR-432 | RAD18    | RAD18    | -        |
| hsa-miR-432 | RAG1     | RAG1     | -        |
| hsa-miR-432 | RANBP6   | RANBP6   | -        |
| hsa-miR-432 | RANGRF   | RANGRF   | -        |
| hsa-miR-432 | RAP1GDS1 | RAP1GDS1 | -        |
| hsa-miR-432 | RAPGEF2  | RAPGEF2  | -        |
| hsa-miR-432 | RARB     | RARB     | -        |
| hsa-miR-432 | RASA1    | RASA1    | -        |
| hsa-miR-432 | RASAL2   | RASAL2   | -        |
| hsa-miR-432 | RASSF2   | RASSF2   | -        |
| hsa-miR-432 | RBM12    | RBM12    | -        |
| hsa-miR-432 | RBM26    | RBM26    | -        |
| hsa-miR-432 | RBM33    | RBM33    | -        |
| hsa-miR-432 | RBM43    | RBM43    | -        |
| hsa-miR-432 | RCL1     | RCL1     | -        |
| hsa-miR-432 | RD3      | RD3      | -        |
| hsa-miR-432 | RDH10    | RDH10    | -        |
| hsa-miR-432 | REV1     | REV1     | -        |
| hsa-miR-432 | RFTN2    | RFTN2    | -        |
| hsa-miR-432 | RFX3     | RFX3     | -        |
| hsa-miR-432 | RGS7BP   | RGS7BP   | -        |
| hsa-miR-432 | RHBDL3   | RHBDL3   | -        |
| hsa-miR-432 | RHCE     | RHCE     | -        |
| hsa-miR-432 | RHD      | RHD      | -        |
| hsa-miR-432 | RHOB     | RHOB     | -        |
| hsa-miR-432 | RHOBTB1  | RHOBTB1  | -        |
| hsa-miR-432 | RHOBTB3  | RHOBTB3  | -        |
| hsa-miR-432 | RHOF     | RHOF     | -        |
| hsa-miR-432 | RIC3     | RIC3     | -        |
| hsa-miR-432 | RIMBP3   | RIMBP3   | -        |
| hsa-miR-432 | RIMBP3B  | RIMBP3B  | -        |

|             |          |          |        |
|-------------|----------|----------|--------|
| hsa-miR-432 | RIMBP3C  | RIMBP3C  | -      |
| hsa-miR-432 | RND3     | RND3     | -      |
| hsa-miR-432 | RNF141   | RNF141   | -      |
| hsa-miR-432 | RNF150   | RNF150   | -      |
| hsa-miR-432 | RNF170   | RNF170   | -      |
| hsa-miR-432 | RNF44    | RNF44    | -      |
| hsa-miR-432 | ROD1     | -        | ROD1   |
| hsa-miR-432 | RORA     | RORA     | -      |
| hsa-miR-432 | RORB     | RORB     | -      |
| hsa-miR-432 | RPAP2    | RPAP2    | -      |
| hsa-miR-432 | RPE      | RPE      | -      |
| hsa-miR-432 | RPH3A    | RPH3A    | -      |
| hsa-miR-432 | RPS29    | -        | RPS29  |
| hsa-miR-432 | RSL1D1   | RSL1D1   | -      |
| hsa-miR-432 | RTF1     | RTF1     | -      |
| hsa-miR-432 | RTN4RL1  | RTN4RL1  | -      |
| hsa-miR-432 | RUNX2    | RUNX2    | -      |
| hsa-miR-432 | RXRB     | RXRB     | -      |
| hsa-miR-432 | -        | RXRG     | RXRG   |
| hsa-miR-432 | SAE1     | SAE1     | -      |
| hsa-miR-432 | SALL2    | SALL2    | -      |
| hsa-miR-432 | SAMD9    | SAMD9    | -      |
| hsa-miR-432 | SBDS     | SBDS     | -      |
| hsa-miR-432 | SBF2     | SBF2     | -      |
| hsa-miR-432 | SCD      | SCD      | -      |
| hsa-miR-432 | SCLT1    | SCLT1    | -      |
| hsa-miR-432 | SCMH1    | SCMH1    | -      |
| hsa-miR-432 | SCN4A    | SCN4A    | -      |
| hsa-miR-432 | SCN5A    | SCN5A    | -      |
| hsa-miR-432 | SCP2     | SCP2     | -      |
| hsa-miR-432 | SDC1     | SDC1     | -      |
| hsa-miR-432 | SDPR     | SDPR     | -      |
| hsa-miR-432 | SEC22A   | SEC22A   | -      |
| hsa-miR-432 | SEC23IP  | SEC23IP  | -      |
| hsa-miR-432 | SECTM1   | SECTM1   | -      |
| hsa-miR-432 | SEMA4D   | SEMA4D   | -      |
| hsa-miR-432 | SEMA6A   | SEMA6A   | -      |
| hsa-miR-432 | SENP5    | SENP5    | -      |
| hsa-miR-432 | SEPT10   | SEPT10   | -      |
| hsa-miR-432 | SEPT3    | SEPT3    | -      |
| hsa-miR-432 | SERF2    | SERF2    | -      |
| hsa-miR-432 | SERPINB9 | SERPINB9 | -      |
| hsa-miR-432 | SERPINE1 | SERPINE1 | -      |
| hsa-miR-432 | SERPINH1 | SERPINH1 | -      |
| hsa-miR-432 | SET      | SET      | -      |
| hsa-miR-432 | -        | SFRS1    | SFRS1  |
| hsa-miR-432 | -        | SFRS3    | SFRS3  |
| hsa-miR-432 | SGK3     | SGK3     | -      |
| hsa-miR-432 | SH2D4A   | SH2D4A   | -      |
| hsa-miR-432 | SH3BP2   | -        | SH3BP2 |
| hsa-miR-432 | SHC2     | SHC2     | -      |

|             |          |          |          |
|-------------|----------|----------|----------|
| hsa-miR-432 | SIAH3    | SIAH3    | -        |
| hsa-miR-432 | SIN3A    | SIN3A    | -        |
| hsa-miR-432 | SIRPA    | SIRPA    | -        |
| hsa-miR-432 | SIRT5    | SIRT5    | -        |
| hsa-miR-432 | SIX5     | -        | SIX5     |
| hsa-miR-432 | SKIV2L2  | SKIV2L2  | -        |
| hsa-miR-432 | SLA      | SLA      | -        |
| hsa-miR-432 | SLAIN2   | SLAIN2   | -        |
| hsa-miR-432 | SLC12A3  | SLC12A3  | -        |
| hsa-miR-432 | SLC13A5  | SLC13A5  | -        |
| hsa-miR-432 | SLC16A14 | SLC16A14 | -        |
| hsa-miR-432 | SLC16A9  | SLC16A9  | -        |
| hsa-miR-432 | SLC19A2  | SLC19A2  | -        |
| hsa-miR-432 | SLC1A1   | SLC1A1   | -        |
| hsa-miR-432 | SLC22A15 | SLC22A15 | -        |
| hsa-miR-432 | SLC25A35 | -        | SLC25A35 |
| hsa-miR-432 | SLC25A4  | SLC25A4  | -        |
| hsa-miR-432 | SLC26A2  | SLC26A2  | -        |
| hsa-miR-432 | SLC2A11  | SLC2A11  | -        |
| hsa-miR-432 | SLC2A13  | SLC2A13  | -        |
| hsa-miR-432 | SLC30A8  | SLC30A8  | -        |
| hsa-miR-432 | SLC35F1  | SLC35F1  | -        |
| hsa-miR-432 | SLC36A3  | SLC36A3  | -        |
| hsa-miR-432 | SLC36A4  | SLC36A4  | -        |
| hsa-miR-432 | SLC39A8  | SLC39A8  | -        |
| hsa-miR-432 | SLC45A2  | SLC45A2  | -        |
| hsa-miR-432 | SLC4A1   | SLC4A1   | -        |
| hsa-miR-432 | SLC5A1   | SLC5A1   | -        |
| hsa-miR-432 | -        | SLC5A12  | SLC5A12  |
| hsa-miR-432 | SLC5A9   | SLC5A9   | -        |
| hsa-miR-432 | SLC6A16  | SLC6A16  | -        |
| hsa-miR-432 | SLC6A20  | SLC6A20  | -        |
| hsa-miR-432 | SLC6A4   | SLC6A4   | -        |
| hsa-miR-432 | SLC7A1   | SLC7A1   | -        |
| hsa-miR-432 | SLC8A1   | SLC8A1   | -        |
| hsa-miR-432 | SLC9A6   | SLC9A6   | -        |
| hsa-miR-432 | SLC9A8   | SLC9A8   | -        |
| hsa-miR-432 | SLCO4C1  | SLCO4C1  | -        |
| hsa-miR-432 | SLCO5A1  | SLCO5A1  | -        |
| hsa-miR-432 | SLMAP    | SLMAP    | -        |
| hsa-miR-432 | SMAD7    | SMAD7    | -        |
| hsa-miR-432 | SMARCD1  | SMARCD1  | -        |
| hsa-miR-432 | SMC2     | SMC2     | -        |
| hsa-miR-432 | SMCHD1   | SMCHD1   | -        |
| hsa-miR-432 | SMCR8    | -        | SMCR8    |
| hsa-miR-432 | SMR3A    | SMR3A    | -        |
| hsa-miR-432 | SNCB     | -        | SNCB     |
| hsa-miR-432 | SNRNP40  | SNRNP40  | -        |
| hsa-miR-432 | SNX1     | SNX1     | -        |
| hsa-miR-432 | SOCS5    | SOCS5    | -        |
| hsa-miR-432 | SOCS7    | SOCS7    | -        |

|             |         |         |        |
|-------------|---------|---------|--------|
| hsa-miR-432 | SORT1   | SORT1   | -      |
| hsa-miR-432 | SOX2    | SOX2    | -      |
| hsa-miR-432 | SOX8    | SOX8    | -      |
| hsa-miR-432 | SP1     | SP1     | -      |
| hsa-miR-432 | SPANXN1 | SPANXN1 | -      |
| hsa-miR-432 | SPANXN5 | SPANXN5 | -      |
| hsa-miR-432 | SPARC   | SPARC   | -      |
| hsa-miR-432 | -       | SPATA1  | SPATA1 |
| hsa-miR-432 | SPATA2  | SPATA2  | -      |
| hsa-miR-432 | SPATA6  | SPATA6  | -      |
| hsa-miR-432 | SPCS2   | SPCS2   | -      |
| hsa-miR-432 | SPDYE3  | SPDYE3  | -      |
| hsa-miR-432 | SPIB    | SPIB    | -      |
| hsa-miR-432 | SPOCK1  | SPOCK1  | -      |
| hsa-miR-432 | SPTBN1  | SPTBN1  | -      |
| hsa-miR-432 | SPTLC3  | SPTLC3  | -      |
| hsa-miR-432 | SPTY2D1 | SPTY2D1 | -      |
| hsa-miR-432 | SRD5A3  | SRD5A3  | -      |
| hsa-miR-432 | SRPK2   | SRPK2   | -      |
| hsa-miR-432 | SSFA2   | SSFA2   | -      |
| hsa-miR-432 | SSR3    | SSR3    | -      |
| hsa-miR-432 | SST     | SST     | -      |
| hsa-miR-432 | -       | SSX2IP  | SSX2IP |
| hsa-miR-432 | STAG2   | STAG2   | -      |
| hsa-miR-432 | STAMBP  | STAMBP  | -      |
| hsa-miR-432 | STARD13 | STARD13 | -      |
| hsa-miR-432 | STAT2   | STAT2   | -      |
| hsa-miR-432 | STK35   | STK35   | -      |
| hsa-miR-432 | STOML1  | STOML1  | -      |
| hsa-miR-432 | STRADA  | STRADA  | -      |
| hsa-miR-432 | STRN3   | STRN3   | -      |
| hsa-miR-432 | STS     | STS     | -      |
| hsa-miR-432 | STX11   | STX11   | -      |
| hsa-miR-432 | STX1A   | -       | STX1A  |
| hsa-miR-432 | STXBP5  | STXBP5  | -      |
| hsa-miR-432 | SUB1    | SUB1    | -      |
| hsa-miR-432 | SUFU    | SUFU    | -      |
| hsa-miR-432 | SUPT16H | SUPT16H | -      |
| hsa-miR-432 | SYN1    | SYN1    | -      |
| hsa-miR-432 | SYN2    | SYN2    | -      |
| hsa-miR-432 | SYNJ2   | SYNJ2   | -      |
| hsa-miR-432 | SYNPO2  | SYNPO2  | -      |
| hsa-miR-432 | SYNRG   | SYNRG   | -      |
| hsa-miR-432 | SYS1    | SYS1    | -      |
| hsa-miR-432 | SYT11   | SYT11   | -      |
| hsa-miR-432 | SYT15   | -       | SYT15  |
| hsa-miR-432 | SYT9    | SYT9    | -      |
| hsa-miR-432 | SYTL5   | SYTL5   | -      |
| hsa-miR-432 | TADA2A  | TADA2A  | -      |
| hsa-miR-432 | TAF11   | TAF11   | -      |
| hsa-miR-432 | TAF4B   | TAF4B   | -      |

|             |          |          |        |
|-------------|----------|----------|--------|
| hsa-miR-432 | TAF5L    | TAF5L    | -      |
| hsa-miR-432 | TAPT1    | TAPT1    | -      |
| hsa-miR-432 | TATDN2   | TATDN2   | -      |
| hsa-miR-432 | TBC1D24  | TBC1D24  | -      |
| hsa-miR-432 | TBL1X    | TBL1X    | -      |
| hsa-miR-432 | TCERG1   | TCERG1   | -      |
| hsa-miR-432 | TCF21    | TCF21    | -      |
| hsa-miR-432 | TCOF1    | TCOF1    | -      |
| hsa-miR-432 | -        | TCP1     | TCP1   |
| hsa-miR-432 | TDGF1    | TDGF1    | -      |
| hsa-miR-432 | TET3     | TET3     | -      |
| hsa-miR-432 | TEX19    | TEX19    | -      |
| hsa-miR-432 | -        | TFAP2A   | TFAP2A |
| hsa-miR-432 | -        | TFDP1    | TFDP1  |
| hsa-miR-432 | TFPI     | TFPI     | -      |
| hsa-miR-432 | TGFB3    | TGFB3    | -      |
| hsa-miR-432 | TGFBR2   | TGFBR2   | -      |
| hsa-miR-432 | TGFBR3   | TGFBR3   | -      |
| hsa-miR-432 | TGIF1    | TGIF1    | -      |
| hsa-miR-432 | TGM2     | TGM2     | -      |
| hsa-miR-432 | TGM4     | TGM4     | -      |
| hsa-miR-432 | THAP6    | THAP6    | -      |
| hsa-miR-432 | THSD7A   | THSD7A   | -      |
| hsa-miR-432 | THUMPD1  | THUMPD1  | -      |
| hsa-miR-432 | TIMM50   | TIMM50   | -      |
| hsa-miR-432 | TIPRL    | TIPRL    | -      |
| hsa-miR-432 | TLK1     | TLK1     | -      |
| hsa-miR-432 | TLK2     | TLK2     | -      |
| hsa-miR-432 | TLL2     | TLL2     | -      |
| hsa-miR-432 | TLR7     | TLR7     | -      |
| hsa-miR-432 | TM4SF18  | TM4SF18  | -      |
| hsa-miR-432 | TMC8     | TMC8     | -      |
| hsa-miR-432 | TMCO7    | TMCO7    | -      |
| hsa-miR-432 | TMED3    | TMED3    | -      |
| hsa-miR-432 | TMEFF1   | TMEFF1   | -      |
| hsa-miR-432 | TMEM106A | TMEM106A | -      |
| hsa-miR-432 | TMEM123  | TMEM123  | -      |
| hsa-miR-432 | TMEM132D | TMEM132D | -      |
| hsa-miR-432 | TMEM135  | TMEM135  | -      |
| hsa-miR-432 | TMEM136  | TMEM136  | -      |
| hsa-miR-432 | TMEM139  | TMEM139  | -      |
| hsa-miR-432 | TMEM155  | TMEM155  | -      |
| hsa-miR-432 | TMEM159  | TMEM159  | -      |
| hsa-miR-432 | TMEM173  | TMEM173  | -      |
| hsa-miR-432 | TMEM185A | TMEM185A | -      |
| hsa-miR-432 | TMEM194B | TMEM194B | -      |
| hsa-miR-432 | TMEM199  | TMEM199  | -      |
| hsa-miR-432 | TMEM20   | TMEM20   | -      |
| hsa-miR-432 | TMEM223  | TMEM223  | -      |
| hsa-miR-432 | TMEM229A | TMEM229A | -      |
| hsa-miR-432 | TMEM232  | TMEM232  | -      |

|             |           |           |        |
|-------------|-----------|-----------|--------|
| hsa-miR-432 | TMEM25    | TMEM25    | -      |
| hsa-miR-432 | TMEM57    | TMEM57    | -      |
| hsa-miR-432 | TMPO      | TMPO      | -      |
| hsa-miR-432 | TMPRSS2   | TMPRSS2   | -      |
| hsa-miR-432 | TMTC1     | TMTC1     | -      |
| hsa-miR-432 | TNFAIP1   | TNFAIP1   | -      |
| hsa-miR-432 | TNFRSF11A | TNFRSF11A | -      |
| hsa-miR-432 | TNFSF15   | TNFSF15   | -      |
| hsa-miR-432 | TNFSF4    | TNFSF4    | -      |
| hsa-miR-432 | TNS3      | TNS3      | -      |
| hsa-miR-432 | TNS4      | TNS4      | -      |
| hsa-miR-432 | TOR1A     | TOR1A     | -      |
| hsa-miR-432 | TOX       | TOX       | -      |
| hsa-miR-432 | TOX4      | TOX4      | -      |
| hsa-miR-432 | TP53RK    | TP53RK    | -      |
| hsa-miR-432 | TP53TG3   | TP53TG3   | -      |
| hsa-miR-432 | TPBG      | TPBG      | -      |
| hsa-miR-432 | TPD52     | TPD52     | -      |
| hsa-miR-432 | TPD52L3   | TPD52L3   | -      |
| hsa-miR-432 | TREM2     | TREM2     | -      |
| hsa-miR-432 | TRERF1    | TRERF1    | -      |
| hsa-miR-432 | TRIM29    | TRIM29    | -      |
| hsa-miR-432 | TRIM44    | TRIM44    | -      |
| hsa-miR-432 | TRIM47    | -         | TRIM47 |
| hsa-miR-432 | TRIM9     | TRIM9     | -      |
| hsa-miR-432 | TRPC5     | TRPC5     | -      |
| hsa-miR-432 | TRPS1     | TRPS1     | -      |
| hsa-miR-432 | TSC1      | TSC1      | -      |
| hsa-miR-432 | TSHR      | TSHR      | -      |
| hsa-miR-432 | TSHZ3     | TSHZ3     | -      |
| hsa-miR-432 | TSPAN12   | TSPAN12   | -      |
| hsa-miR-432 | TSPAN18   | TSPAN18   | -      |
| hsa-miR-432 | TSPAN3    | TSPAN3    | -      |
| hsa-miR-432 | TSPAN31   | TSPAN31   | -      |
| hsa-miR-432 | TTC39A    | TTC39A    | -      |
| hsa-miR-432 | TTC9      | TTC9      | -      |
| hsa-miR-432 | TTYH2     | TTYH2     | -      |
| hsa-miR-432 | TUB       | TUB       | -      |
| hsa-miR-432 | TUBB      | TUBB      | -      |
| hsa-miR-432 | TXNDC17   | TXNDC17   | -      |
| hsa-miR-432 | TXNRD1    | TXNRD1    | -      |
| hsa-miR-432 | TYRO3     | TYRO3     | -      |
| hsa-miR-432 | TYW1      | TYW1      | -      |
| hsa-miR-432 | TYW1B     | TYW1B     | -      |
| hsa-miR-432 | TYW3      | TYW3      | -      |
| hsa-miR-432 | UBA52     | UBA52     | -      |
| hsa-miR-432 | UBAP2     | UBAP2     | -      |
| hsa-miR-432 | UBE2Q1    | UBE2Q1    | -      |
| hsa-miR-432 | UBE2Z     | UBE2Z     | -      |
| hsa-miR-432 | UBLCP1    | UBLCP1    | -      |
| hsa-miR-432 | UBQLN4    | UBQLN4    | -      |

|             |         |         |         |
|-------------|---------|---------|---------|
| hsa-miR-432 | UBR2    | UBR2    | -       |
| hsa-miR-432 | UBXN4   | UBXN4   | -       |
| hsa-miR-432 | UGGT1   | UGGT1   | -       |
| hsa-miR-432 | UHRF1   | UHRF1   | -       |
| hsa-miR-432 | ULBP1   | ULBP1   | -       |
| hsa-miR-432 | UNC5A   | -       | UNC5A   |
| hsa-miR-432 | UNC80   | UNC80   | -       |
| hsa-miR-432 | UNKL    | UNKL    | -       |
| hsa-miR-432 | UPK3B   | UPK3B   | -       |
| hsa-miR-432 | USP2    | USP2    | -       |
| hsa-miR-432 | USP42   | USP42   | -       |
| hsa-miR-432 | USP6NL  | USP6NL  | -       |
| hsa-miR-432 | USP9Y   | USP9Y   | -       |
| hsa-miR-432 | UTP23   | UTP23   | -       |
| hsa-miR-432 | UTRN    | UTRN    | -       |
| hsa-miR-432 | VEZT    | VEZT    | -       |
| hsa-miR-432 | VIPR1   | VIPR1   | -       |
| hsa-miR-432 | VPS13A  | VPS13A  | -       |
| hsa-miR-432 | VPS13D  | VPS13D  | -       |
| hsa-miR-432 | VPS29   | VPS29   | -       |
| hsa-miR-432 | VSTM2A  | VSTM2A  | -       |
| hsa-miR-432 | VSTM2B  | VSTM2B  | -       |
| hsa-miR-432 | VSX1    | VSX1    | -       |
| hsa-miR-432 | VWCE    | -       | VWCE    |
| hsa-miR-432 | WASF2   | WASF2   | -       |
| hsa-miR-432 | WASF3   | WASF3   | -       |
| hsa-miR-432 | WBSCR16 | WBSCR16 | -       |
| hsa-miR-432 | WDFY1   | WDFY1   | -       |
| hsa-miR-432 | WDFY3   | WDFY3   | -       |
| hsa-miR-432 | WDR33   | WDR33   | -       |
| hsa-miR-432 | WDR47   | WDR47   | -       |
| hsa-miR-432 | WFDC13  | WFDC13  | -       |
| hsa-miR-432 | WNT5A   | WNT5A   | -       |
| hsa-miR-432 | WSB1    | WSB1    | -       |
| hsa-miR-432 | WSCD1   | WSCD1   | -       |
| hsa-miR-432 | WWP1    | WWP1    | -       |
| hsa-miR-432 | WWP2    | WWP2    | -       |
| hsa-miR-432 | YTHDC1  | YTHDC1  | -       |
| hsa-miR-432 | ZBP1    | ZBP1    | -       |
| hsa-miR-432 | ZBTB1   | ZBTB1   | -       |
| hsa-miR-432 | ZBTB3   | ZBTB3   | -       |
| hsa-miR-432 | ZBTB34  | ZBTB34  | -       |
| hsa-miR-432 | ZC3H12A | -       | ZC3H12A |
| hsa-miR-432 | ZCCHC14 | ZCCHC14 | -       |
| hsa-miR-432 | ZCCHC16 | ZCCHC16 | -       |
| hsa-miR-432 | ZDHHC16 | -       | ZDHHC16 |
| hsa-miR-432 | ZDHHC3  | ZDHHC3  | -       |
| hsa-miR-432 | ZDHHC7  | ZDHHC7  | -       |
| hsa-miR-432 | ZDHHC9  | -       | ZDHHC9  |
| hsa-miR-432 | ZFP3    | ZFP3    | -       |
| hsa-miR-432 | ZFP64   | ZFP64   | -       |



|             |         |         |         |
|-------------|---------|---------|---------|
| hsa-miR-432 | ZHX2    | ZHX2    | -       |
| hsa-miR-432 | ZKSCAN2 | ZKSCAN2 | -       |
| hsa-miR-432 | ZMAT1   | ZMAT1   | -       |
| hsa-miR-432 | ZMAT4   | ZMAT4   | -       |
| hsa-miR-432 | ZMIZ1   | ZMIZ1   | -       |
| hsa-miR-432 | ZMYM5   | ZMYM5   | -       |
| hsa-miR-432 | ZMYND11 | ZMYND11 | -       |
| hsa-miR-432 | ZNF134  | ZNF134  | -       |
| hsa-miR-432 | ZNF146  | ZNF146  | -       |
| hsa-miR-432 | ZNF155  | ZNF155  | -       |
| hsa-miR-432 | ZNF251  | ZNF251  | -       |
| hsa-miR-432 | ZNF257  | ZNF257  | -       |
| hsa-miR-432 | ZNF275  | -       | ZNF275  |
| hsa-miR-432 | ZNF280C | ZNF280C | -       |
| hsa-miR-432 | ZNF280D | ZNF280D | -       |
| hsa-miR-432 | ZNF296  | ZNF296  | -       |
| hsa-miR-432 | ZNF324  | ZNF324  | -       |
| hsa-miR-432 | ZNF324B | ZNF324B | -       |
| hsa-miR-432 | ZNF326  | ZNF326  | -       |
| hsa-miR-432 | ZNF33A  | ZNF33A  | -       |
| hsa-miR-432 | ZNF33B  | ZNF33B  | -       |
| hsa-miR-432 | ZNF416  | ZNF416  | -       |
| hsa-miR-432 | ZNF417  | ZNF417  | -       |
| hsa-miR-432 | ZNF503  | ZNF503  | -       |
| hsa-miR-432 | ZNF507  | ZNF507  | -       |
| hsa-miR-432 | ZNF521  | ZNF521  | -       |
| hsa-miR-432 | ZNF561  | ZNF561  | -       |
| hsa-miR-432 | ZNF562  | ZNF562  | -       |
| hsa-miR-432 | ZNF566  | ZNF566  | -       |
| hsa-miR-432 | ZNF589  | ZNF589  | -       |
| hsa-miR-432 | -       | ZNF655  | ZNF655  |
| hsa-miR-432 | ZNF665  | ZNF665  | -       |
| hsa-miR-432 | ZNF687  | ZNF687  | -       |
| hsa-miR-432 | ZNF80   | ZNF80   | -       |
| hsa-miR-432 | ZNF92   | ZNF92   | -       |
| hsa-miR-433 | AAK1    | -       | AAK1    |
| hsa-miR-433 | ABCC9   | ABCC9   | -       |
| hsa-miR-433 | -       | ACAA2   | ACAA2   |
| hsa-miR-433 | ACTC1   | ACTC1   | -       |
| hsa-miR-433 | -       | ADAMTS6 | ADAMTS6 |
| hsa-miR-433 | -       | ADD3    | ADD3    |
| hsa-miR-433 | -       | AHNAK   | AHNAK   |
| hsa-miR-433 | -       | AKAP7   | AKAP7   |
| hsa-miR-433 | ANAPC11 | ANAPC11 | -       |
| hsa-miR-433 | ANKRD12 | ANKRD12 | -       |
| hsa-miR-433 | -       | ANKRD44 | ANKRD44 |
| hsa-miR-433 | -       | ANKRD45 | ANKRD45 |
| hsa-miR-433 | ANO5    | ANO5    | -       |
| hsa-miR-433 | -       | ANTXR1  | ANTXR1  |
| hsa-miR-433 | -       | AP3B1   | AP3B1   |
| hsa-miR-433 | ARL10   | ARL10   | -       |

|             |          |          |          |
|-------------|----------|----------|----------|
| hsa-miR-433 | ARMC1    | ARMC1    | -        |
| hsa-miR-433 | -        | ARMCX2   | ARMCX2   |
| hsa-miR-433 | -        | ARPC1A   | ARPC1A   |
| hsa-miR-433 | ARRDC4   | ARRDC4   | -        |
| hsa-miR-433 | -        | ASPM     | ASPM     |
| hsa-miR-433 | ATAD1    | ATAD1    | -        |
| hsa-miR-433 | -        | ATG4A    | ATG4A    |
| hsa-miR-433 | -        | ATP13A2  | ATP13A2  |
| hsa-miR-433 | -        | ATP1A4   | ATP1A4   |
| hsa-miR-433 | -        | ATRNL1   | ATRNL1   |
| hsa-miR-433 | AZIN1    | AZIN1    | -        |
| hsa-miR-433 | BPTF     | BPTF     | -        |
| hsa-miR-433 | BRWD1    | BRWD1    | -        |
| hsa-miR-433 | -        | BTF3     | BTF3     |
| hsa-miR-433 | -        | C10orf99 | C10orf99 |
| hsa-miR-433 | C18orf25 | C18orf25 | -        |
| hsa-miR-433 | -        | C18orf34 | C18orf34 |
| hsa-miR-433 | -        | C18orf55 | C18orf55 |
| hsa-miR-433 | -        | C1QC     | C1QC     |
| hsa-miR-433 | -        | C1S      | C1S      |
| hsa-miR-433 | C1orf131 | C1orf131 | -        |
| hsa-miR-433 | -        | C1orf162 | C1orf162 |
| hsa-miR-433 | -        | C1orf185 | C1orf185 |
| hsa-miR-433 | -        | C20orf54 | C20orf54 |
| hsa-miR-433 | -        | C21orf49 | C21orf49 |
| hsa-miR-433 | -        | C2orf34  | C2orf34  |
| hsa-miR-433 | C3orf63  | C3orf63  | -        |
| hsa-miR-433 | -        | C6orf58  | C6orf58  |
| hsa-miR-433 | -        | C6orf72  | C6orf72  |
| hsa-miR-433 | C7orf41  | C7orf41  | -        |
| hsa-miR-433 | -        | C7orf49  | C7orf49  |
| hsa-miR-433 | -        | C8orf40  | C8orf40  |
| hsa-miR-433 | -        | C8orf76  | C8orf76  |
| hsa-miR-433 | -        | C9orf100 | C9orf100 |
| hsa-miR-433 | -        | C9orf46  | C9orf46  |
| hsa-miR-433 | -        | C9orf68  | C9orf68  |
| hsa-miR-433 | -        | CACNA2D3 | CACNA2D3 |
| hsa-miR-433 | -        | CADPS    | CADPS    |
| hsa-miR-433 | -        | CALCB    | CALCB    |
| hsa-miR-433 | -        | CAPS2    | CAPS2    |
| hsa-miR-433 | CBLL1    | CBLL1    | -        |
| hsa-miR-433 | CCAR1    | CCAR1    | -        |
| hsa-miR-433 | -        | CCDC121  | CCDC121  |
| hsa-miR-433 | CCDC138  | CCDC138  | -        |
| hsa-miR-433 | CCDC82   | CCDC82   | -        |
| hsa-miR-433 | -        | CCT4     | CCT4     |
| hsa-miR-433 | -        | CDADC1   | CDADC1   |
| hsa-miR-433 | CDK17    | CDK17    | -        |
| hsa-miR-433 | -        | CEACAM6  | CEACAM6  |
| hsa-miR-433 | CELF2    | CELF2    | -        |
| hsa-miR-433 | -        | CENPL    | CENPL    |

|             |          |          |         |
|-------------|----------|----------|---------|
| hsa-miR-433 | -        | CENPN    | CENPN   |
| hsa-miR-433 | CEP135   | CEP135   | -       |
| hsa-miR-433 | -        | CHD2     | CHD2    |
| hsa-miR-433 | CHD9     | CHD9     | -       |
| hsa-miR-433 | CHST11   | CHST11   | -       |
| hsa-miR-433 | -        | CHST7    | CHST7   |
| hsa-miR-433 | -        | CIRH1A   | CIRH1A  |
| hsa-miR-433 | -        | CLCN5    | CLCN5   |
| hsa-miR-433 | -        | CLEC6A   | CLEC6A  |
| hsa-miR-433 | CLINT1   | CLINT1   | -       |
| hsa-miR-433 | CLIP1    | CLIP1    | -       |
| hsa-miR-433 | -        | CLRN1    | CLRN1   |
| hsa-miR-433 | -        | CLRN3    | CLRN3   |
| hsa-miR-433 | CLTC     | CLTC     | -       |
| hsa-miR-433 | CMTM4    | CMTM4    | -       |
| hsa-miR-433 | CNOT6    | CNOT6    | -       |
| hsa-miR-433 | COG5     | COG5     | -       |
| hsa-miR-433 | -        | COG7     | COG7    |
| hsa-miR-433 | COL4A3BP | COL4A3BP | -       |
| hsa-miR-433 | -        | COMMD2   | COMMD2  |
| hsa-miR-433 | -        | COPS4    | COPS4   |
| hsa-miR-433 | -        | COQ5     | COQ5    |
| hsa-miR-433 | -        | CPS1     | CPS1    |
| hsa-miR-433 | -        | CPT2     | CPT2    |
| hsa-miR-433 | CRLF3    | CRLF3    | -       |
| hsa-miR-433 | -        | CRYM     | CRYM    |
| hsa-miR-433 | -        | CSPP1    | CSPP1   |
| hsa-miR-433 | -        | CTCF     | CTCF    |
| hsa-miR-433 | CTNNA1   | CTNNA1   | -       |
| hsa-miR-433 | -        | CTNNAL1  | CTNNAL1 |
| hsa-miR-433 | -        | CTNNBL1  | CTNNBL1 |
| hsa-miR-433 | CUL5     | CUL5     | -       |
| hsa-miR-433 | -        | CUTA     | CUTA    |
| hsa-miR-433 | -        | CXorf58  | CXorf58 |
| hsa-miR-433 | -        | CYB5R4   | CYB5R4  |
| hsa-miR-433 | CYCS     | CYCS     | -       |
| hsa-miR-433 | -        | DDX55    | DDX55   |
| hsa-miR-433 | DENND4C  | DENND4C  | -       |
| hsa-miR-433 | -        | DEPDC1   | DEPDC1  |
| hsa-miR-433 | -        | DHX29    | DHX29   |
| hsa-miR-433 | -        | DMP1     | DMP1    |
| hsa-miR-433 | -        | DNAJB11  | DNAJB11 |
| hsa-miR-433 | DNAJB12  | DNAJB12  | -       |
| hsa-miR-433 | DNAJB7   | DNAJB7   | -       |
| hsa-miR-433 | DNAJC5   | DNAJC5   | -       |
| hsa-miR-433 | -        | DNM3     | DNM3    |
| hsa-miR-433 | -        | DOCK2    | DOCK2   |
| hsa-miR-433 | DPH3     | DPH3     | -       |
| hsa-miR-433 | -        | DPY19L3  | DPY19L3 |
| hsa-miR-433 | DPY19L4  | DPY19L4  | -       |
| hsa-miR-433 | DPYSL3   | DPYSL3   | -       |

|             |         |         |         |
|-------------|---------|---------|---------|
| hsa-miR-433 | -       | DST     | DST     |
| hsa-miR-433 | EBF3    | EBF3    | -       |
| hsa-miR-433 | EDIL3   | EDIL3   | -       |
| hsa-miR-433 | -       | EDN3    | EDN3    |
| hsa-miR-433 | -       | EED     | EED     |
| hsa-miR-433 | ENPP6   | ENPP6   | -       |
| hsa-miR-433 | ENY2    | ENY2    | -       |
| hsa-miR-433 | EPC2    | EPC2    | -       |
| hsa-miR-433 | -       | EPHA6   | EPHA6   |
| hsa-miR-433 | EPHA7   | EPHA7   | -       |
| hsa-miR-433 | EPN2    | EPN2    | -       |
| hsa-miR-433 | -       | EPRS    | EPRS    |
| hsa-miR-433 | -       | ESCO2   | ESCO2   |
| hsa-miR-433 | EXTL2   | EXTL2   | -       |
| hsa-miR-433 | -       | F13B    | F13B    |
| hsa-miR-433 | -       | FAM24B  | FAM24B  |
| hsa-miR-433 | -       | FAM53B  | FAM53B  |
| hsa-miR-433 | FAM91A1 | FAM91A1 | -       |
| hsa-miR-433 | FBXO21  | FBXO21  | -       |
| hsa-miR-433 | FBXO22  | FBXO22  | -       |
| hsa-miR-433 | -       | FBXO24  | FBXO24  |
| hsa-miR-433 | FBXO48  | FBXO48  | -       |
| hsa-miR-433 | FBXW7   | FBXW7   | -       |
| hsa-miR-433 | FERMT2  | FERMT2  | -       |
| hsa-miR-433 | -       | FGF20   | FGF20   |
| hsa-miR-433 | FGF7    | FGF7    | -       |
| hsa-miR-433 | -       | FGFR2   | FGFR2   |
| hsa-miR-433 | -       | FGL1    | FGL1    |
| hsa-miR-433 | -       | FILIP1  | FILIP1  |
| hsa-miR-433 | FOXN3   | FOXN3   | -       |
| hsa-miR-433 | FOXP2   | FOXP2   | -       |
| hsa-miR-433 | -       | FSHB    | FSHB    |
| hsa-miR-433 | FTSJD1  | FTSJD1  | -       |
| hsa-miR-433 | GALNT1  | GALNT1  | -       |
| hsa-miR-433 | GCLC    | GCLC    | -       |
| hsa-miR-433 | GIGYF2  | GIGYF2  | -       |
| hsa-miR-433 | -       | GLRX    | GLRX    |
| hsa-miR-433 | -       | GLS2    | GLS2    |
| hsa-miR-433 | -       | GMCL1L  | GMCL1L  |
| hsa-miR-433 | GNA13   | GNA13   | -       |
| hsa-miR-433 | GNPTAB  | GNPTAB  | -       |
| hsa-miR-433 | -       | GOT1    | GOT1    |
| hsa-miR-433 | GPR137C | GPR137C | -       |
| hsa-miR-433 | GRB2    | GRB2    | -       |
| hsa-miR-433 | -       | GRIA3   | GRIA3   |
| hsa-miR-433 | GRIP1   | GRIP1   | -       |
| hsa-miR-433 | GXYLT1  | GXYLT1  | -       |
| hsa-miR-433 | HBS1L   | HBS1L   | -       |
| hsa-miR-433 | -       | HDAC6   | HDAC6   |
| hsa-miR-433 | -       | HEATR5B | HEATR5B |
| hsa-miR-433 | HECW2   | HECW2   | -       |

|             |          |          |          |
|-------------|----------|----------|----------|
| hsa-miR-433 | -        | HIF1A    | HIF1A    |
| hsa-miR-433 | -        | HNMT     | HNMT     |
| hsa-miR-433 | HNRNPR   | HNRNPR   | -        |
| hsa-miR-433 | HNRNPU   | HNRNPU   | -        |
| hsa-miR-433 | HOXA1    | HOXA1    | -        |
| hsa-miR-433 | HRNR     | HRNR     | -        |
| hsa-miR-433 | HTR5A    | HTR5A    | -        |
| hsa-miR-433 | -        | IER3IP1  | IER3IP1  |
| hsa-miR-433 | -        | IFNA10   | IFNA10   |
| hsa-miR-433 | -        | IFNA4    | IFNA4    |
| hsa-miR-433 | -        | IFT80    | IFT80    |
| hsa-miR-433 | -        | IGSF11   | IGSF11   |
| hsa-miR-433 | -        | IL22     | IL22     |
| hsa-miR-433 | IMPA1    | IMPA1    | -        |
| hsa-miR-433 | IMPAD1   | IMPAD1   | -        |
| hsa-miR-433 | INTS2    | INTS2    | -        |
| hsa-miR-433 | IPO7     | -        | IPO7     |
| hsa-miR-433 | IQGAP1   | IQGAP1   | -        |
| hsa-miR-433 | -        | IRF4     | IRF4     |
| hsa-miR-433 | -        | IRF8     | IRF8     |
| hsa-miR-433 | -        | ISL1     | ISL1     |
| hsa-miR-433 | -        | ITFG1    | ITFG1    |
| hsa-miR-433 | ITGAV    | ITGAV    | -        |
| hsa-miR-433 | KCNMA1   | KCNMA1   | -        |
| hsa-miR-433 | KIAA1432 | KIAA1432 | -        |
| hsa-miR-433 | -        | KIAA1704 | KIAA1704 |
| hsa-miR-433 | -        | KIF1B    | KIF1B    |
| hsa-miR-433 | KPNA1    | KPNA1    | -        |
| hsa-miR-433 | KPNA4    | KPNA4    | -        |
| hsa-miR-433 | -        | KPNA5    | KPNA5    |
| hsa-miR-433 | -        | KRT20    | KRT20    |
| hsa-miR-433 | -        | KRT6A    | KRT6A    |
| hsa-miR-433 | LAMC1    | LAMC1    | -        |
| hsa-miR-433 | LEPR     | LEPR     | -        |
| hsa-miR-433 | -        | LMO2     | LMO2     |
| hsa-miR-433 | -        | LMOD2    | LMOD2    |
| hsa-miR-433 | LPHN2    | LPHN2    | -        |
| hsa-miR-433 | -        | LPL      | LPL      |
| hsa-miR-433 | -        | LPXN     | LPXN     |
| hsa-miR-433 | -        | LRIG3    | LRIG3    |
| hsa-miR-433 | LSM14A   | LSM14A   | -        |
| hsa-miR-433 | LSM5     | LSM5     | -        |
| hsa-miR-433 | LYRM7    | LYRM7    | -        |
| hsa-miR-433 | MACC1    | MACC1    | -        |
| hsa-miR-433 | -        | MAD2L1   | MAD2L1   |
| hsa-miR-433 | -        | MAGI3    | MAGI3    |
| hsa-miR-433 | MAP2K4   | MAP2K4   | -        |
| hsa-miR-433 | -        | MAP3K1   | MAP3K1   |
| hsa-miR-433 | -        | MAP9     | MAP9     |
| hsa-miR-433 | -        | MAPK9    | MAPK9    |
| hsa-miR-433 | MBNL1    | MBNL1    | -        |

|             |         |         |         |
|-------------|---------|---------|---------|
| hsa-miR-433 | -       | MBTPS1  | MBTPS1  |
| hsa-miR-433 | -       | MCTP1   | MCTP1   |
| hsa-miR-433 | MED1    | MED1    | -       |
| hsa-miR-433 | -       | MED6    | MED6    |
| hsa-miR-433 | -       | MICB    | MICB    |
| hsa-miR-433 | MIER1   | MIER1   | -       |
| hsa-miR-433 | MMD     | MMD     | -       |
| hsa-miR-433 | -       | MPP3    | MPP3    |
| hsa-miR-433 | -       | MRO     | MRO     |
| hsa-miR-433 | MSL2    | MSL2    | -       |
| hsa-miR-433 | MSR1    | MSR1    | -       |
| hsa-miR-433 | -       | MTMR11  | MTMR11  |
| hsa-miR-433 | -       | MTMR14  | MTMR14  |
| hsa-miR-433 | -       | MTMR7   | MTMR7   |
| hsa-miR-433 | -       | MTRF1   | MTRF1   |
| hsa-miR-433 | MTX3    | MTX3    | -       |
| hsa-miR-433 | -       | MUC17   | MUC17   |
| hsa-miR-433 | MXI1    | MXI1    | -       |
| hsa-miR-433 | MYEF2   | MYEF2   | -       |
| hsa-miR-433 | MYH9    | MYH9    | -       |
| hsa-miR-433 | NAA11   | NAA11   | -       |
| hsa-miR-433 | NAA30   | NAA30   | -       |
| hsa-miR-433 | NAB1    | NAB1    | -       |
| hsa-miR-433 | NEGR1   | NEGR1   | -       |
| hsa-miR-433 | -       | NEK3    | NEK3    |
| hsa-miR-433 | NEK7    | NEK7    | -       |
| hsa-miR-433 | -       | NFIB    | NFIB    |
| hsa-miR-433 | NFYB    | NFYB    | -       |
| hsa-miR-433 | -       | NGFRAP1 | NGFRAP1 |
| hsa-miR-433 | -       | NGLY1   | NGLY1   |
| hsa-miR-433 | -       | NMI     | NMI     |
| hsa-miR-433 | -       | NOL10   | NOL10   |
| hsa-miR-433 | NOVA1   | NOVA1   | -       |
| hsa-miR-433 | NR3C1   | NR3C1   | -       |
| hsa-miR-433 | NSD1    | NSD1    | -       |
| hsa-miR-433 | NUCKS1  | NUCKS1  | -       |
| hsa-miR-433 | -       | NUP35   | NUP35   |
| hsa-miR-433 | -       | NXPH1   | NXPH1   |
| hsa-miR-433 | -       | OBSCN   | OBSCN   |
| hsa-miR-433 | ODZ1    | ODZ1    | -       |
| hsa-miR-433 | -       | OMA1    | OMA1    |
| hsa-miR-433 | PAPD5   | -       | PAPD5   |
| hsa-miR-433 | PAPOLG  | PAPOLG  | -       |
| hsa-miR-433 | PAX6    | PAX6    | -       |
| hsa-miR-433 | PBRM1   | PBRM1   | -       |
| hsa-miR-433 | PCBP2   | PCBP2   | -       |
| hsa-miR-433 | -       | PCDH11X | PCDH11X |
| hsa-miR-433 | PCDH11Y | PCDH11Y | -       |
| hsa-miR-433 | -       | PDE4DIP | PDE4DIP |
| hsa-miR-433 | PDP2    | PDP2    | -       |
| hsa-miR-433 | -       | PDZD11  | PDZD11  |

|             |         |          |          |
|-------------|---------|----------|----------|
| hsa-miR-433 | -       | PERP     | PERP     |
| hsa-miR-433 | PEX13   | PEX13    | -        |
| hsa-miR-433 | -       | PGBD2    | PGBD2    |
| hsa-miR-433 | -       | PHF20L1  | PHF20L1  |
| hsa-miR-433 | -       | PISD     | PISD     |
| hsa-miR-433 | -       | PLA2G4A  | PLA2G4A  |
| hsa-miR-433 | PLEKHH2 | PLEKHH2  | -        |
| hsa-miR-433 | PLN     | PLN      | -        |
| hsa-miR-433 | -       | PLS3     | PLS3     |
| hsa-miR-433 | POT1    | POT1     | -        |
| hsa-miR-433 | POU6F1  | POU6F1   | -        |
| hsa-miR-433 | -       | PPP1R1C  | PPP1R1C  |
| hsa-miR-433 | PPP3R1  | PPP3R1   | -        |
| hsa-miR-433 | PRKAG2  | PRKAG2   | -        |
| hsa-miR-433 | -       | PRNP     | PRNP     |
| hsa-miR-433 | -       | PRPF4B   | PRPF4B   |
| hsa-miR-433 | PRR23C  | PRR23C   | -        |
| hsa-miR-433 | -       | PSG1     | PSG1     |
| hsa-miR-433 | -       | PSG8     | PSG8     |
| hsa-miR-433 | -       | PSMB9    | PSMB9    |
| hsa-miR-433 | -       | PTGER3   | PTGER3   |
| hsa-miR-433 | -       | PTPN4    | PTPN4    |
| hsa-miR-433 | -       | PTPRC    | PTPRC    |
| hsa-miR-433 | -       | PURG     | PURG     |
| hsa-miR-433 | QKI     | QKI      | -        |
| hsa-miR-433 | -       | RAB40B   | RAB40B   |
| hsa-miR-433 | -       | RAB5C    | RAB5C    |
| hsa-miR-433 | RAD21   | RAD21    | -        |
| hsa-miR-433 | RALB    | RALB     | -        |
| hsa-miR-433 | -       | RAP1A    | RAP1A    |
| hsa-miR-433 | -       | RAP1GDS1 | RAP1GDS1 |
| hsa-miR-433 | -       | RAP2C    | RAP2C    |
| hsa-miR-433 | RBM12   | RBM12    | -        |
| hsa-miR-433 | -       | RBM14    | RBM14    |
| hsa-miR-433 | RBM17   | RBM17    | -        |
| hsa-miR-433 | RBMS3   | RBMS3    | -        |
| hsa-miR-433 | -       | RET      | RET      |
| hsa-miR-433 | -       | RGSL1    | RGSL1    |
| hsa-miR-433 | RHOQ    | RHOQ     | -        |
| hsa-miR-433 | -       | RIC3     | RIC3     |
| hsa-miR-433 | RIOK3   | RIOK3    | -        |
| hsa-miR-433 | -       | ROBO2    | ROBO2    |
| hsa-miR-433 | RORA    | RORA     | -        |
| hsa-miR-433 | RPRD1A  | RPRD1A   | -        |
| hsa-miR-433 | -       | RPS6KB2  | RPS6KB2  |
| hsa-miR-433 | RSBN1   | RSBN1    | -        |
| hsa-miR-433 | RUNDC3B | RUNDC3B  | -        |
| hsa-miR-433 | -       | SAR1B    | SAR1B    |
| hsa-miR-433 | -       | SARM1    | SARM1    |
| hsa-miR-433 | -       | SASH1    | SASH1    |
| hsa-miR-433 | SASS6   | SASS6    | -        |

|             |            |            |            |
|-------------|------------|------------|------------|
| hsa-miR-433 | -          | SAT1       | SAT1       |
| hsa-miR-433 | SCAF1      | SCAF1      | -          |
| hsa-miR-433 | SCN1B      | SCN1B      | -          |
| hsa-miR-433 | -          | SCN8A      | SCN8A      |
| hsa-miR-433 | -          | SEC61A2    | SEC61A2    |
| hsa-miR-433 | SERBP1     | SERBP1     | -          |
| hsa-miR-433 | -          | SESN3      | SESN3      |
| hsa-miR-433 | SESTD1     | SESTD1     | -          |
| hsa-miR-433 | -          | SFRS12     | SFRS12     |
| hsa-miR-433 | -          | SFRS8      | SFRS8      |
| hsa-miR-433 | SGMS2      | SGMS2      | -          |
| hsa-miR-433 | -          | SH3GLB1    | SH3GLB1    |
| hsa-miR-433 | SH3TC2     | SH3TC2     | -          |
| hsa-miR-433 | -          | SIRPB1     | SIRPB1     |
| hsa-miR-433 | SKP1       | SKP1       | -          |
| hsa-miR-433 | -          | SLAMF1     | SLAMF1     |
| hsa-miR-433 | -          | SLC17A4    | SLC17A4    |
| hsa-miR-433 | -          | SLC25A43   | SLC25A43   |
| hsa-miR-433 | SLC25A46   | SLC25A46   | -          |
| hsa-miR-433 | SLC30A6    | SLC30A6    | -          |
| hsa-miR-433 | -          | SLC35A1    | SLC35A1    |
| hsa-miR-433 | -          | SLIT2      | SLIT2      |
| hsa-miR-433 | SLU7       | SLU7       | -          |
| hsa-miR-433 | -          | SORBS2     | SORBS2     |
| hsa-miR-433 | -          | SP140      | SP140      |
| hsa-miR-433 | -          | SPA17      | SPA17      |
| hsa-miR-433 | SPARC      | SPARC      | -          |
| hsa-miR-433 | -          | SRP54      | SRP54      |
| hsa-miR-433 | SSPN       | SSPN       | -          |
| hsa-miR-433 | -          | ST3GAL2    | ST3GAL2    |
| hsa-miR-433 | -          | ST3GAL4    | ST3GAL4    |
| hsa-miR-433 | ST6GALNAC3 | ST6GALNAC3 | -          |
| hsa-miR-433 | -          | ST6GALNAC4 | ST6GALNAC4 |
| hsa-miR-433 | ST8SIA4    | ST8SIA4    | -          |
| hsa-miR-433 | STK38      | STK38      | -          |
| hsa-miR-433 | STYX       | STYX       | -          |
| hsa-miR-433 | -          | SUCLA2     | SUCLA2     |
| hsa-miR-433 | SUPT7L     | SUPT7L     | -          |
| hsa-miR-433 | -          | SUSD4      | SUSD4      |
| hsa-miR-433 | -          | SYPL1      | SYPL1      |
| hsa-miR-433 | -          | TAF1       | TAF1       |
| hsa-miR-433 | -          | TAP2       | TAP2       |
| hsa-miR-433 | -          | TATDN1     | TATDN1     |
| hsa-miR-433 | TEF        | TEF        | -          |
| hsa-miR-433 | -          | TEK        | TEK        |
| hsa-miR-433 | TET3       | TET3       | -          |
| hsa-miR-433 | TGFBR1     | TGFBR1     | -          |
| hsa-miR-433 | -          | TGM6       | TGM6       |
| hsa-miR-433 | THAP10     | THAP10     | -          |
| hsa-miR-433 | TIA1       | TIA1       | -          |
| hsa-miR-433 | -          | TIMM9      | TIMM9      |



|             |          |          |         |
|-------------|----------|----------|---------|
| hsa-miR-433 | TLR10    | TLR10    | -       |
| hsa-miR-433 | TMED5    | TMED5    | -       |
| hsa-miR-433 | TMEM108  | TMEM108  | -       |
| hsa-miR-433 | -        | TMEM14A  | TMEM14A |
| hsa-miR-433 | TMEM216  | TMEM216  | -       |
| hsa-miR-433 | TMEM33   | TMEM33   | -       |
| hsa-miR-433 | TMPO     | TMPO     | -       |
| hsa-miR-433 | TMX3     | TMX3     | -       |
| hsa-miR-433 | -        | TNFSF9   | TNFSF9  |
| hsa-miR-433 | TNRC6C   | TNRC6C   | -       |
| hsa-miR-433 | TOP1     | TOP1     | -       |
| hsa-miR-433 | TRIM2    | TRIM2    | -       |
| hsa-miR-433 | TTC13    | TTC13    | -       |
| hsa-miR-433 | -        | TXNL4A   | TXNL4A  |
| hsa-miR-433 | -        | TYMS     | TYMS    |
| hsa-miR-433 | -        | TYROBP   | TYROBP  |
| hsa-miR-433 | UBE2D2   | UBE2D2   | -       |
| hsa-miR-433 | UBE2H    | -        | UBE2H   |
| hsa-miR-433 | UBE2QL1  | UBE2QL1  | -       |
| hsa-miR-433 | UBR5     | UBR5     | -       |
| hsa-miR-433 | -        | ULBP2    | ULBP2   |
| hsa-miR-433 | USH2A    | USH2A    | -       |
| hsa-miR-433 | -        | USP45    | USP45   |
| hsa-miR-433 | USP6     | USP6     | -       |
| hsa-miR-433 | UST      | UST      | -       |
| hsa-miR-433 | UXS1     | UXS1     | -       |
| hsa-miR-433 | VASH2    | VASH2    | -       |
| hsa-miR-433 | VKORC1L1 | VKORC1L1 | -       |
| hsa-miR-433 | -        | VWA2     | VWA2    |
| hsa-miR-433 | WAPAL    | WAPAL    | -       |
| hsa-miR-433 | -        | WDR61    | WDR61   |
| hsa-miR-433 | -        | WDR85    | WDR85   |
| hsa-miR-433 | WTAP     | WTAP     | -       |
| hsa-miR-433 | WWC3     | WWC3     | -       |
| hsa-miR-433 | -        | XPOT     | XPOT    |
| hsa-miR-433 | YTHDF3   | YTHDF3   | -       |
| hsa-miR-433 | YWHAG    | YWHAG    | -       |
| hsa-miR-433 | YWHAZ    | -        | YWHAZ   |
| hsa-miR-433 | -        | ZBTB11   | ZBTB11  |
| hsa-miR-433 | ZC3H12B  | ZC3H12B  | -       |
| hsa-miR-433 | -        | ZCCHC9   | ZCCHC9  |
| hsa-miR-433 | ZDHHC7   | ZDHHC7   | -       |
| hsa-miR-433 | -        | ZFAND1   | ZFAND1  |
| hsa-miR-433 | ZFHX4    | ZFHX4    | -       |
| hsa-miR-433 | ZMIZ1    | ZMIZ1    | -       |
| hsa-miR-433 | -        | ZMYND12  | ZMYND12 |
| hsa-miR-433 | -        | ZNF174   | ZNF174  |
| hsa-miR-433 | -        | ZNF187   | ZNF187  |
| hsa-miR-433 | ZNF317   | ZNF317   | -       |
| hsa-miR-433 | -        | ZNF397   | ZNF397  |
| hsa-miR-433 | -        | ZNF443   | ZNF443  |

|                 |        |          |          |
|-----------------|--------|----------|----------|
| hsa-miR-433     | -      | ZNF564   | ZNF564   |
| hsa-miR-433     | ZNF567 | ZNF567   | -        |
| hsa-miR-433     | -      | ZNF586   | ZNF586   |
| hsa-miR-433     | -      | ZNF614   | ZNF614   |
| hsa-miR-433     | ZNF615 | ZNF615   | -        |
| hsa-miR-433     | -      | ZNF620   | ZNF620   |
| hsa-miR-433     | ZNF639 | ZNF639   | -        |
| hsa-miR-433     | -      | ZNF700   | ZNF700   |
| hsa-miR-433     | ZNF862 | ZNF862   | -        |
| hsa-miR-433     | ZSWIM6 | ZSWIM6   | -        |
| hsa-miR-450b-5p | -      | AADAT    | AADAT    |
| hsa-miR-450b-5p | -      | ABCA1    | ABCA1    |
| hsa-miR-450b-5p | -      | ABCC6    | ABCC6    |
| hsa-miR-450b-5p | -      | ADAM28   | ADAM28   |
| hsa-miR-450b-5p | -      | ADAM7    | ADAM7    |
| hsa-miR-450b-5p | -      | AGA      | AGA      |
| hsa-miR-450b-5p | -      | AGTPBP1  | AGTPBP1  |
| hsa-miR-450b-5p | -      | AGXT2L1  | AGXT2L1  |
| hsa-miR-450b-5p | -      | AMT      | AMT      |
| hsa-miR-450b-5p | -      | ANKRD1   | ANKRD1   |
| hsa-miR-450b-5p | -      | ANKRD18A | ANKRD18A |
| hsa-miR-450b-5p | -      | ANKRD50  | ANKRD50  |
| hsa-miR-450b-5p | -      | ANKS6    | ANKS6    |
| hsa-miR-450b-5p | -      | ANXA13   | ANXA13   |
| hsa-miR-450b-5p | -      | AOAH     | AOAH     |
| hsa-miR-450b-5p | -      | APOOL    | APOOL    |
| hsa-miR-450b-5p | -      | ARF4     | ARF4     |
| hsa-miR-450b-5p | -      | ARL6     | ARL6     |
| hsa-miR-450b-5p | -      | ARPC2    | ARPC2    |
| hsa-miR-450b-5p | -      | ART3     | ART3     |
| hsa-miR-450b-5p | -      | ATG10    | ATG10    |
| hsa-miR-450b-5p | -      | ATP5C1   | ATP5C1   |
| hsa-miR-450b-5p | -      | ATP6V1H  | ATP6V1H  |

|                 |   |           |           |
|-----------------|---|-----------|-----------|
| 5p              |   |           |           |
| hsa-miR-450b-5p | - | BARX2     | BARX2     |
| hsa-miR-450b-5p | - | BBOX1     | BBOX1     |
| hsa-miR-450b-5p | - | BPI       | BPI       |
| hsa-miR-450b-5p | - | BRF2      | BRF2      |
| hsa-miR-450b-5p | - | BTBD8     | BTBD8     |
| hsa-miR-450b-5p | - | C10orf81  | C10orf81  |
| hsa-miR-450b-5p | - | C11orf54  | C11orf54  |
| hsa-miR-450b-5p | - | C12orf11  | C12orf11  |
| hsa-miR-450b-5p | - | C12orf64  | C12orf64  |
| hsa-miR-450b-5p | - | C14orf179 | C14orf179 |
| hsa-miR-450b-5p | - | C19orf2   | C19orf2   |
| hsa-miR-450b-5p | - | C1GALT1C1 | C1GALT1C1 |
| hsa-miR-450b-5p | - | C1orf125  | C1orf125  |
| hsa-miR-450b-5p | - | C1orf174  | C1orf174  |
| hsa-miR-450b-5p | - | C20orf85  | C20orf85  |
| hsa-miR-450b-5p | - | C22orf28  | C22orf28  |
| hsa-miR-450b-5p | - | C3orf58   | C3orf58   |
| hsa-miR-450b-5p | - | C5AR1     | C5AR1     |
| hsa-miR-450b-5p | - | C5orf28   | C5orf28   |
| hsa-miR-450b-5p | - | C8orf37   | C8orf37   |
| hsa-miR-450b-5p | - | C9orf40   | C9orf40   |
| hsa-miR-450b-5p | - | CABP5     | CABP5     |
| hsa-miR-450b-5p | - | CACNG6    | CACNG6    |
| hsa-miR-450b-5p | - | CALM2     | CALM2     |
| hsa-miR-450b-5p | - | CAMK2N1   | CAMK2N1   |
| hsa-miR-450b-5p | - | CAMSAP1   | CAMSAP1   |
| hsa-miR-450b-5p | - | CCL4      | CCL4      |
| hsa-miR-450b-5p | - | CCNL1     | CCNL1     |

|                 |   |        |        |
|-----------------|---|--------|--------|
| 5p              |   |        |        |
| hsa-miR-450b-5p | - | CD69   | CD69   |
| hsa-miR-450b-5p | - | CDC42  | CDC42  |
| hsa-miR-450b-5p | - | CDKL4  | CDKL4  |
| hsa-miR-450b-5p | - | CDKN2C | CDKN2C |
| hsa-miR-450b-5p | - | CENPE  | CENPE  |
| hsa-miR-450b-5p | - | CENPK  | CENPK  |
| hsa-miR-450b-5p | - | CEP63  | CEP63  |
| hsa-miR-450b-5p | - | CEP70  | CEP70  |
| hsa-miR-450b-5p | - | CES7   | CES7   |
| hsa-miR-450b-5p | - | CHCHD4 | CHCHD4 |
| hsa-miR-450b-5p | - | CHMP5  | CHMP5  |
| hsa-miR-450b-5p | - | CHST11 | CHST11 |
| hsa-miR-450b-5p | - | CLCC1  | CLCC1  |
| hsa-miR-450b-5p | - | CLCN3  | CLCN3  |
| hsa-miR-450b-5p | - | CLEC3B | CLEC3B |
| hsa-miR-450b-5p | - | CLEC9A | CLEC9A |
| hsa-miR-450b-5p | - | CMTM8  | CMTM8  |
| hsa-miR-450b-5p | - | CNGA3  | CNGA3  |
| hsa-miR-450b-5p | - | CNOT1  | CNOT1  |
| hsa-miR-450b-5p | - | CNTN6  | CNTN6  |
| hsa-miR-450b-5p | - | COL2A1 | COL2A1 |
| hsa-miR-450b-5p | - | COPS2  | COPS2  |
| hsa-miR-450b-5p | - | COPS3  | COPS3  |
| hsa-miR-450b-5p | - | CRB1   | CRB1   |
| hsa-miR-450b-5p | - | CRH    | CRH    |
| hsa-miR-450b-5p | - | CRISP1 | CRISP1 |
| hsa-miR-450b-5p | - | CSAG2  | CSAG2  |
| hsa-miR-450b-5p | - | CTH    | CTH    |

|                 |   |         |         |
|-----------------|---|---------|---------|
| 5p              |   |         |         |
| hsa-miR-450b-5p | - | CYR61   | CYR61   |
| hsa-miR-450b-5p | - | DBC1    | DBC1    |
| hsa-miR-450b-5p | - | DDX24   | DDX24   |
| hsa-miR-450b-5p | - | DDX50   | DDX50   |
| hsa-miR-450b-5p | - | DEFB119 | DEFB119 |
| hsa-miR-450b-5p | - | DEPDC4  | DEPDC4  |
| hsa-miR-450b-5p | - | DERL2   | DERL2   |
| hsa-miR-450b-5p | - | DHRS4   | DHRS4   |
| hsa-miR-450b-5p | - | DHRS4L2 | DHRS4L2 |
| hsa-miR-450b-5p | - | DHRS9   | DHRS9   |
| hsa-miR-450b-5p | - | DIAPH2  | DIAPH2  |
| hsa-miR-450b-5p | - | DNAJC1  | DNAJC1  |
| hsa-miR-450b-5p | - | DOCK7   | DOCK7   |
| hsa-miR-450b-5p | - | DSTN    | DSTN    |
| hsa-miR-450b-5p | - | DUSP22  | DUSP22  |
| hsa-miR-450b-5p | - | DYM     | DYM     |
| hsa-miR-450b-5p | - | EEF1E1  | EEF1E1  |
| hsa-miR-450b-5p | - | EID2B   | EID2B   |
| hsa-miR-450b-5p | - | ENPEP   | ENPEP   |
| hsa-miR-450b-5p | - | ERICH1  | ERICH1  |
| hsa-miR-450b-5p | - | ESD     | ESD     |
| hsa-miR-450b-5p | - | EXOSC3  | EXOSC3  |
| hsa-miR-450b-5p | - | FAF1    | FAF1    |
| hsa-miR-450b-5p | - | FAM111A | FAM111A |
| hsa-miR-450b-5p | - | FAM111B | FAM111B |
| hsa-miR-450b-5p | - | FAM19A5 | FAM19A5 |
| hsa-miR-450b-5p | - | FAM45B  | FAM45B  |
| hsa-miR-450b-5p | - | FAM69B  | FAM69B  |

|                 |   |        |        |
|-----------------|---|--------|--------|
| 5p              |   |        |        |
| hsa-miR-450b-5p | - | FBXL12 | FBXL12 |
| hsa-miR-450b-5p | - | FBXO30 | FBXO30 |
| hsa-miR-450b-5p | - | FCER1A | FCER1A |
| hsa-miR-450b-5p | - | FCRL2  | FCRL2  |
| hsa-miR-450b-5p | - | FGD4   | FGD4   |
| hsa-miR-450b-5p | - | FGG    | FGG    |
| hsa-miR-450b-5p | - | FILIP1 | FILIP1 |
| hsa-miR-450b-5p | - | FKBP7  | FKBP7  |
| hsa-miR-450b-5p | - | FOXE1  | FOXE1  |
| hsa-miR-450b-5p | - | FRK    | FRK    |
| hsa-miR-450b-5p | - | FTL    | FTL    |
| hsa-miR-450b-5p | - | FUT8   | FUT8   |
| hsa-miR-450b-5p | - | GAB1   | GAB1   |
| hsa-miR-450b-5p | - | GAD2   | GAD2   |
| hsa-miR-450b-5p | - | GAS1   | GAS1   |
| hsa-miR-450b-5p | - | GBP7   | GBP7   |
| hsa-miR-450b-5p | - | GDAP2  | GDAP2  |
| hsa-miR-450b-5p | - | GEM    | GEM    |
| hsa-miR-450b-5p | - | GIMAP7 | GIMAP7 |
| hsa-miR-450b-5p | - | GKAP1  | GKAP1  |
| hsa-miR-450b-5p | - | GLCCI1 | GLCCI1 |
| hsa-miR-450b-5p | - | GPBP1  | GPBP1  |
| hsa-miR-450b-5p | - | GPC3   | GPC3   |
| hsa-miR-450b-5p | - | GPM6B  | GPM6B  |
| hsa-miR-450b-5p | - | GPR116 | GPR116 |
| hsa-miR-450b-5p | - | GPR174 | GPR174 |
| hsa-miR-450b-5p | - | GPR22  | GPR22  |
| hsa-miR-450b-5p | - | GRB14  | GRB14  |

|                 |   |         |         |
|-----------------|---|---------|---------|
| 5p              |   |         |         |
| hsa-miR-450b-5p | - | GRM8    | GRM8    |
| hsa-miR-450b-5p | - | GSN     | GSN     |
| hsa-miR-450b-5p | - | GSPT1   | GSPT1   |
| hsa-miR-450b-5p | - | GSPT2   | GSPT2   |
| hsa-miR-450b-5p | - | HACE1   | HACE1   |
| hsa-miR-450b-5p | - | HADHB   | HADHB   |
| hsa-miR-450b-5p | - | HAT1    | HAT1    |
| hsa-miR-450b-5p | - | HCFC2   | HCFC2   |
| hsa-miR-450b-5p | - | HFM1    | HFM1    |
| hsa-miR-450b-5p | - | HGD     | HGD     |
| hsa-miR-450b-5p | - | HIATL1  | HIATL1  |
| hsa-miR-450b-5p | - | HLA-F   | HLA-F   |
| hsa-miR-450b-5p | - | HNMT    | HNMT    |
| hsa-miR-450b-5p | - | HS3ST2  | HS3ST2  |
| hsa-miR-450b-5p | - | HSD11B1 | HSD11B1 |
| hsa-miR-450b-5p | - | HSPA2   | HSPA2   |
| hsa-miR-450b-5p | - | ICT1    | ICT1    |
| hsa-miR-450b-5p | - | IFI35   | IFI35   |
| hsa-miR-450b-5p | - | IFT80   | IFT80   |
| hsa-miR-450b-5p | - | IK      | IK      |
| hsa-miR-450b-5p | - | IL12A   | IL12A   |
| hsa-miR-450b-5p | - | IL15    | IL15    |
| hsa-miR-450b-5p | - | IL16    | IL16    |
| hsa-miR-450b-5p | - | IL1F10  | IL1F10  |
| hsa-miR-450b-5p | - | INTS10  | INTS10  |
| hsa-miR-450b-5p | - | JAM2    | JAM2    |
| hsa-miR-450b-5p | - | KCNAB3  | KCNAB3  |
| hsa-miR-450b-5p | - | KCNJ16  | KCNJ16  |

|                 |   |          |          |
|-----------------|---|----------|----------|
| 5p              |   |          |          |
| hsa-miR-450b-5p | - | KCNN2    | KCNN2    |
| hsa-miR-450b-5p | - | KCTD1    | KCTD1    |
| hsa-miR-450b-5p | - | KIAA0146 | KIAA0146 |
| hsa-miR-450b-5p | - | KIAA0174 | KIAA0174 |
| hsa-miR-450b-5p | - | KIAA1328 | KIAA1328 |
| hsa-miR-450b-5p | - | KLF6     | KLF6     |
| hsa-miR-450b-5p | - | KRT20    | KRT20    |
| hsa-miR-450b-5p | - | KRT26    | KRT26    |
| hsa-miR-450b-5p | - | KRT32    | KRT32    |
| hsa-miR-450b-5p | - | LENG1    | LENG1    |
| hsa-miR-450b-5p | - | LGTN     | LGTN     |
| hsa-miR-450b-5p | - | LINGO2   | LINGO2   |
| hsa-miR-450b-5p | - | LNX1     | LNX1     |
| hsa-miR-450b-5p | - | LONRF1   | LONRF1   |
| hsa-miR-450b-5p | - | LONRF3   | LONRF3   |
| hsa-miR-450b-5p | - | LOR      | LOR      |
| hsa-miR-450b-5p | - | LRRC1    | LRRC1    |
| hsa-miR-450b-5p | - | LSM14B   | LSM14B   |
| hsa-miR-450b-5p | - | LSM7     | LSM7     |
| hsa-miR-450b-5p | - | LUM      | LUM      |
| hsa-miR-450b-5p | - | LZIC     | LZIC     |
| hsa-miR-450b-5p | - | MAGED1   | MAGED1   |
| hsa-miR-450b-5p | - | MAGED4   | MAGED4   |
| hsa-miR-450b-5p | - | MAGED4B  | MAGED4B  |
| hsa-miR-450b-5p | - | MAK      | MAK      |
| hsa-miR-450b-5p | - | MAP2     | MAP2     |
| hsa-miR-450b-5p | - | MAP4K5   | MAP4K5   |
| hsa-miR-450b-5p | - | MAPK9    | MAPK9    |



|                 |   |          |          |
|-----------------|---|----------|----------|
| 5p              |   |          |          |
| hsa-miR-450b-5p | - | MAPKAPK5 | MAPKAPK5 |
| hsa-miR-450b-5p | - | MBD5     | MBD5     |
| hsa-miR-450b-5p | - | MCC      | MCC      |
| hsa-miR-450b-5p | - | MCM3     | MCM3     |
| hsa-miR-450b-5p | - | MED12    | MED12    |
| hsa-miR-450b-5p | - | MEMO1    | MEMO1    |
| hsa-miR-450b-5p | - | MIA3     | MIA3     |
| hsa-miR-450b-5p | - | MMP1     | MMP1     |
| hsa-miR-450b-5p | - | MRPL11   | MRPL11   |
| hsa-miR-450b-5p | - | MS4A12   | MS4A12   |
| hsa-miR-450b-5p | - | MSX1     | MSX1     |
| hsa-miR-450b-5p | - | MTERF    | MTERF    |
| hsa-miR-450b-5p | - | MTMR1    | MTMR1    |
| hsa-miR-450b-5p | - | MTTP     | MTTP     |
| hsa-miR-450b-5p | - | MYBPC1   | MYBPC1   |
| hsa-miR-450b-5p | - | MYF5     | MYF5     |
| hsa-miR-450b-5p | - | MYH2     | MYH2     |
| hsa-miR-450b-5p | - | MYL7     | MYL7     |
| hsa-miR-450b-5p | - | NCOA6    | NCOA6    |
| hsa-miR-450b-5p | - | NDNL2    | NDNL2    |
| hsa-miR-450b-5p | - | NDRG3    | NDRG3    |
| hsa-miR-450b-5p | - | NEB      | NEB      |
| hsa-miR-450b-5p | - | NEFM     | NEFM     |
| hsa-miR-450b-5p | - | NELL1    | NELL1    |
| hsa-miR-450b-5p | - | NFE2L2   | NFE2L2   |
| hsa-miR-450b-5p | - | NHLRC1   | NHLRC1   |
| hsa-miR-450b-5p | - | NID2     | NID2     |
| hsa-miR-450b-5p | - | NTS      | NTS      |

|                 |   |         |         |
|-----------------|---|---------|---------|
| 5p              |   |         |         |
| hsa-miR-450b-5p | - | NUP85   | NUP85   |
| hsa-miR-450b-5p | - | NXT2    | NXT2    |
| hsa-miR-450b-5p | - | OCEL1   | OCEL1   |
| hsa-miR-450b-5p | - | OGN     | OGN     |
| hsa-miR-450b-5p | - | OLFML2B | OLFML2B |
| hsa-miR-450b-5p | - | ORC5L   | ORC5L   |
| hsa-miR-450b-5p | - | OTOA    | OTOA    |
| hsa-miR-450b-5p | - | OXNAD1  | OXNAD1  |
| hsa-miR-450b-5p | - | PABPC4  | PABPC4  |
| hsa-miR-450b-5p | - | PALM2   | PALM2   |
| hsa-miR-450b-5p | - | PALMD   | PALMD   |
| hsa-miR-450b-5p | - | PAN3    | PAN3    |
| hsa-miR-450b-5p | - | PANK1   | PANK1   |
| hsa-miR-450b-5p | - | PARP14  | PARP14  |
| hsa-miR-450b-5p | - | PAX9    | PAX9    |
| hsa-miR-450b-5p | - | PCDH7   | PCDH7   |
| hsa-miR-450b-5p | - | PCM1    | PCM1    |
| hsa-miR-450b-5p | - | PCSK4   | PCSK4   |
| hsa-miR-450b-5p | - | PDZRN3  | PDZRN3  |
| hsa-miR-450b-5p | - | PELO    | PELO    |
| hsa-miR-450b-5p | - | PEX5L   | PEX5L   |
| hsa-miR-450b-5p | - | PFDN1   | PFDN1   |
| hsa-miR-450b-5p | - | PHF14   | PHF14   |
| hsa-miR-450b-5p | - | PHTF1   | PHTF1   |
| hsa-miR-450b-5p | - | PKD2L2  | PKD2L2  |
| hsa-miR-450b-5p | - | PLA2G3  | PLA2G3  |
| hsa-miR-450b-5p | - | PLXDC2  | PLXDC2  |
| hsa-miR-450b-5p | - | PMS1    | PMS1    |

|                 |   |         |         |
|-----------------|---|---------|---------|
| 5p              |   |         |         |
| hsa-miR-450b-5p | - | PNN     | PNN     |
| hsa-miR-450b-5p | - | PNRC1   | PNRC1   |
| hsa-miR-450b-5p | - | POLG    | POLG    |
| hsa-miR-450b-5p | - | POLR3F  | POLR3F  |
| hsa-miR-450b-5p | - | PPP2R2A | PPP2R2A |
| hsa-miR-450b-5p | - | PPWD1   | PPWD1   |
| hsa-miR-450b-5p | - | PRDM16  | PRDM16  |
| hsa-miR-450b-5p | - | PRKCD   | PRKCD   |
| hsa-miR-450b-5p | - | PROX1   | PROX1   |
| hsa-miR-450b-5p | - | PSMD14  | PSMD14  |
| hsa-miR-450b-5p | - | PTPRD   | PTPRD   |
| hsa-miR-450b-5p | - | PTPRZ1  | PTPRZ1  |
| hsa-miR-450b-5p | - | PTX3    | PTX3    |
| hsa-miR-450b-5p | - | PURA    | PURA    |
| hsa-miR-450b-5p | - | RAB28   | RAB28   |
| hsa-miR-450b-5p | - | RAB3IP  | RAB3IP  |
| hsa-miR-450b-5p | - | RABGGTB | RABGGTB |
| hsa-miR-450b-5p | - | RAD54B  | RAD54B  |
| hsa-miR-450b-5p | - | RAD9B   | RAD9B   |
| hsa-miR-450b-5p | - | RBKS    | RBKS    |
| hsa-miR-450b-5p | - | REV1    | REV1    |
| hsa-miR-450b-5p | - | RNASE1  | RNASE1  |
| hsa-miR-450b-5p | - | RNASE2  | RNASE2  |
| hsa-miR-450b-5p | - | RNASE3  | RNASE3  |
| hsa-miR-450b-5p | - | RNF113B | RNF113B |
| hsa-miR-450b-5p | - | RPL34   | RPL34   |
| hsa-miR-450b-5p | - | RPLP0   | RPLP0   |
| hsa-miR-450b-5p | - | RPP14   | RPP14   |

|                 |   |          |          |
|-----------------|---|----------|----------|
| 5p              |   |          |          |
| hsa-miR-450b-5p | - | RRAGA    | RRAGA    |
| hsa-miR-450b-5p | - | RRAGB    | RRAGB    |
| hsa-miR-450b-5p | - | RRP15    | RRP15    |
| hsa-miR-450b-5p | - | RSRC1    | RSRC1    |
| hsa-miR-450b-5p | - | RTN4     | RTN4     |
| hsa-miR-450b-5p | - | RTTN     | RTTN     |
| hsa-miR-450b-5p | - | RUFY2    | RUFY2    |
| hsa-miR-450b-5p | - | RYR2     | RYR2     |
| hsa-miR-450b-5p | - | SAP30L   | SAP30L   |
| hsa-miR-450b-5p | - | SAPS1    | SAPS1    |
| hsa-miR-450b-5p | - | SAV1     | SAV1     |
| hsa-miR-450b-5p | - | SEPHS2   | SEPHS2   |
| hsa-miR-450b-5p | - | SERPINA9 | SERPINA9 |
| hsa-miR-450b-5p | - | SESN3    | SESN3    |
| hsa-miR-450b-5p | - | SETD3    | SETD3    |
| hsa-miR-450b-5p | - | SETX     | SETX     |
| hsa-miR-450b-5p | - | SF3B4    | SF3B4    |
| hsa-miR-450b-5p | - | SFRS12   | SFRS12   |
| hsa-miR-450b-5p | - | SGCE     | SGCE     |
| hsa-miR-450b-5p | - | SIAH1    | SIAH1    |
| hsa-miR-450b-5p | - | SIRT5    | SIRT5    |
| hsa-miR-450b-5p | - | SIX1     | SIX1     |
| hsa-miR-450b-5p | - | SLBP     | SLBP     |
| hsa-miR-450b-5p | - | SLC10A4  | SLC10A4  |
| hsa-miR-450b-5p | - | SLC16A10 | SLC16A10 |
| hsa-miR-450b-5p | - | SLC26A7  | SLC26A7  |
| hsa-miR-450b-5p | - | SLC27A2  | SLC27A2  |
| hsa-miR-450b-5p | - | SLC28A2  | SLC28A2  |

|                 |   |         |         |
|-----------------|---|---------|---------|
| 5p              |   |         |         |
| hsa-miR-450b-5p | - | SLC35A2 | SLC35A2 |
| hsa-miR-450b-5p | - | SLC35B3 | SLC35B3 |
| hsa-miR-450b-5p | - | SLC35D2 | SLC35D2 |
| hsa-miR-450b-5p | - | SLC35F5 | SLC35F5 |
| hsa-miR-450b-5p | - | SLC36A2 | SLC36A2 |
| hsa-miR-450b-5p | - | SLC36A4 | SLC36A4 |
| hsa-miR-450b-5p | - | SLC5A9  | SLC5A9  |
| hsa-miR-450b-5p | - | SLC9A10 | SLC9A10 |
| hsa-miR-450b-5p | - | SLCO1C1 | SLCO1C1 |
| hsa-miR-450b-5p | - | SLIT2   | SLIT2   |
| hsa-miR-450b-5p | - | SLIT3   | SLIT3   |
| hsa-miR-450b-5p | - | SMCR7L  | SMCR7L  |
| hsa-miR-450b-5p | - | SMYD3   | SMYD3   |
| hsa-miR-450b-5p | - | SOX2    | SOX2    |
| hsa-miR-450b-5p | - | SPAG9   | SPAG9   |
| hsa-miR-450b-5p | - | SPO11   | SPO11   |
| hsa-miR-450b-5p | - | SPRY1   | SPRY1   |
| hsa-miR-450b-5p | - | SPRY2   | SPRY2   |
| hsa-miR-450b-5p | - | STAC3   | STAC3   |
| hsa-miR-450b-5p | - | STAT4   | STAT4   |
| hsa-miR-450b-5p | - | STK17B  | STK17B  |
| hsa-miR-450b-5p | - | STK31   | STK31   |
| hsa-miR-450b-5p | - | STK32A  | STK32A  |
| hsa-miR-450b-5p | - | SUMF2   | SUMF2   |
| hsa-miR-450b-5p | - | SUPV3L1 | SUPV3L1 |
| hsa-miR-450b-5p | - | TACR1   | TACR1   |
| hsa-miR-450b-5p | - | TAF1A   | TAF1A   |
| hsa-miR-450b-5p | - | TBL2    | TBL2    |

|                 |   |          |          |
|-----------------|---|----------|----------|
| 5p              |   |          |          |
| hsa-miR-450b-5p | - | TCEAL1   | TCEAL1   |
| hsa-miR-450b-5p | - | TCEAL6   | TCEAL6   |
| hsa-miR-450b-5p | - | TCEAL7   | TCEAL7   |
| hsa-miR-450b-5p | - | TCEAL8   | TCEAL8   |
| hsa-miR-450b-5p | - | THOC3    | THOC3    |
| hsa-miR-450b-5p | - | THSD7B   | THSD7B   |
| hsa-miR-450b-5p | - | TM6SF1   | TM6SF1   |
| hsa-miR-450b-5p | - | TMC6     | TMC6     |
| hsa-miR-450b-5p | - | TMED5    | TMED5    |
| hsa-miR-450b-5p | - | TMEM132C | TMEM132C |
| hsa-miR-450b-5p | - | TMEM57   | TMEM57   |
| hsa-miR-450b-5p | - | TMEM59   | TMEM59   |
| hsa-miR-450b-5p | - | TMF1     | TMF1     |
| hsa-miR-450b-5p | - | TMLHE    | TMLHE    |
| hsa-miR-450b-5p | - | TMPRSS3  | TMPRSS3  |
| hsa-miR-450b-5p | - | TNFAIP6  | TNFAIP6  |
| hsa-miR-450b-5p | - | TNFSF11  | TNFSF11  |
| hsa-miR-450b-5p | - | TOMM70A  | TOMM70A  |
| hsa-miR-450b-5p | - | TOR1AIP1 | TOR1AIP1 |
| hsa-miR-450b-5p | - | TPCN2    | TPCN2    |
| hsa-miR-450b-5p | - | TPP2     | TPP2     |
| hsa-miR-450b-5p | - | TPST2    | TPST2    |
| hsa-miR-450b-5p | - | TRIM21   | TRIM21   |
| hsa-miR-450b-5p | - | TRIM7    | TRIM7    |
| hsa-miR-450b-5p | - | TRO      | TRO      |
| hsa-miR-450b-5p | - | TROVE2   | TROVE2   |
| hsa-miR-450b-5p | - | TRPM3    | TRPM3    |
| hsa-miR-450b-5p | - | TRPM6    | TRPM6    |

|                 |   |         |         |
|-----------------|---|---------|---------|
| 5p              |   |         |         |
| hsa-miR-450b-5p | - | TSPAN17 | TSPAN17 |
| hsa-miR-450b-5p | - | TTBK2   | TTBK2   |
| hsa-miR-450b-5p | - | TUBA4A  | TUBA4A  |
| hsa-miR-450b-5p | - | TUBE1   | TUBE1   |
| hsa-miR-450b-5p | - | TWIST1  | TWIST1  |
| hsa-miR-450b-5p | - | TXNDC11 | TXNDC11 |
| hsa-miR-450b-5p | - | TXNL1   | TXNL1   |
| hsa-miR-450b-5p | - | TYR     | TYR     |
| hsa-miR-450b-5p | - | UAP1    | UAP1    |
| hsa-miR-450b-5p | - | UBE2I   | UBE2I   |
| hsa-miR-450b-5p | - | UBE2U   | UBE2U   |
| hsa-miR-450b-5p | - | UGT2B17 | UGT2B17 |
| hsa-miR-450b-5p | - | UGT2B4  | UGT2B4  |
| hsa-miR-450b-5p | - | UNC50   | UNC50   |
| hsa-miR-450b-5p | - | UQCRFS1 | UQCRFS1 |
| hsa-miR-450b-5p | - | VCP     | VCP     |
| hsa-miR-450b-5p | - | VCX     | VCX     |
| hsa-miR-450b-5p | - | VCX2    | VCX2    |
| hsa-miR-450b-5p | - | VCX3A   | VCX3A   |
| hsa-miR-450b-5p | - | VCX3B   | VCX3B   |
| hsa-miR-450b-5p | - | VNN2    | VNN2    |
| hsa-miR-450b-5p | - | WAC     | WAC     |
| hsa-miR-450b-5p | - | WDR5B   | WDR5B   |
| hsa-miR-450b-5p | - | WIF1    | WIF1    |
| hsa-miR-450b-5p | - | WIZ     | WIZ     |
| hsa-miR-450b-5p | - | WRNIP1  | WRNIP1  |
| hsa-miR-450b-5p | - | XKR4    | XKR4    |
| hsa-miR-450b-5p | - | XPNPEP1 | XPNPEP1 |

|                 |   |         |         |
|-----------------|---|---------|---------|
| 5p              |   |         |         |
| hsa-miR-450b-5p | - | YME1L1  | YME1L1  |
| hsa-miR-450b-5p | - | ZAR1    | ZAR1    |
| hsa-miR-450b-5p | - | ZFPM2   | ZFPM2   |
| hsa-miR-450b-5p | - | ZMYND17 | ZMYND17 |
| hsa-miR-450b-5p | - | ZNF521  | ZNF521  |
| hsa-miR-450b-5p | - | ZNF536  | ZNF536  |
| hsa-miR-450b-5p | - | ZNF569  | ZNF569  |
| hsa-miR-450b-5p | - | ZNF614  | ZNF614  |
| hsa-miR-450b-5p | - | ZNF793  | ZNF793  |
| hsa-miR-450b-5p | - | ZNF83   | ZNF83   |
| hsa-miR-450b-5p | - | ZRANB3  | ZRANB3  |
| hsa-miR-486-3p  | - | AANAT   | AANAT   |
| hsa-miR-486-3p  | - | AATK    | AATK    |
| hsa-miR-486-3p  | - | ABCF3   | ABCF3   |
| hsa-miR-486-3p  | - | ABHD1   | ABHD1   |
| hsa-miR-486-3p  | - | ABHD12  | ABHD12  |
| hsa-miR-486-3p  | - | ABI3    | ABI3    |
| hsa-miR-486-3p  | - | ACRBP   | ACRBP   |
| hsa-miR-486-3p  | - | AEBP1   | AEBP1   |
| hsa-miR-486-3p  | - | AES     | AES     |
| hsa-miR-486-3p  | - | ALDH1L1 | ALDH1L1 |
| hsa-miR-486-3p  | - | ALDOA   | ALDOA   |
| hsa-miR-486-3p  | - | ALKBH6  | ALKBH6  |
| hsa-miR-486-3p  | - | ANGPT4  | ANGPT4  |
| hsa-miR-486-3p  | - | APOC3   | APOC3   |
| hsa-miR-486-3p  | - | ARID1B  | ARID1B  |
| hsa-miR-486-3p  | - | ARMC6   | ARMC6   |
| hsa-miR-486-3p  | - | ARPC1B  | ARPC1B  |



|                |   |          |          |
|----------------|---|----------|----------|
| 3p             |   |          |          |
| hsa-miR-486-3p | - | ATP1A3   | ATP1A3   |
| hsa-miR-486-3p | - | ATP5D    | ATP5D    |
| hsa-miR-486-3p | - | ATP6AP1  | ATP6AP1  |
| hsa-miR-486-3p | - | BAI2     | BAI2     |
| hsa-miR-486-3p | - | BAIAP2   | BAIAP2   |
| hsa-miR-486-3p | - | BCL6B    | BCL6B    |
| hsa-miR-486-3p | - | BEST1    | BEST1    |
| hsa-miR-486-3p | - | BIN1     | BIN1     |
| hsa-miR-486-3p | - | BPIL1    | BPIL1    |
| hsa-miR-486-3p | - | C17orf49 | C17orf49 |
| hsa-miR-486-3p | - | C17orf53 | C17orf53 |
| hsa-miR-486-3p | - | C17orf81 | C17orf81 |
| hsa-miR-486-3p | - | C18orf56 | C18orf56 |
| hsa-miR-486-3p | - | C19orf36 | C19orf36 |
| hsa-miR-486-3p | - | C19orf46 | C19orf46 |
| hsa-miR-486-3p | - | C19orf50 | C19orf50 |
| hsa-miR-486-3p | - | C19orf59 | C19orf59 |
| hsa-miR-486-3p | - | C1orf68  | C1orf68  |
| hsa-miR-486-3p | - | C2       | C2       |
| hsa-miR-486-3p | - | C20orf70 | C20orf70 |
| hsa-miR-486-3p | - | C3orf45  | C3orf45  |
| hsa-miR-486-3p | - | C6orf125 | C6orf125 |
| hsa-miR-486-3p | - | C6orf153 | C6orf153 |
| hsa-miR-486-3p | - | C9orf98  | C9orf98  |
| hsa-miR-486-3p | - | CACNG1   | CACNG1   |
| hsa-miR-486-3p | - | CAD      | CAD      |
| hsa-miR-486-3p | - | CAPG     | CAPG     |
| hsa-miR-486-3p | - | CARD14   | CARD14   |

|                |   |          |          |
|----------------|---|----------|----------|
| 3p             |   |          |          |
| hsa-miR-486-3p | - | CCDC114  | CCDC114  |
| hsa-miR-486-3p | - | CCDC12   | CCDC12   |
| hsa-miR-486-3p | - | CCDC36   | CCDC36   |
| hsa-miR-486-3p | - | CCDC9    | CCDC9    |
| hsa-miR-486-3p | - | CD164L2  | CD164L2  |
| hsa-miR-486-3p | - | CD300LG  | CD300LG  |
| hsa-miR-486-3p | - | CD320    | CD320    |
| hsa-miR-486-3p | - | CD79A    | CD79A    |
| hsa-miR-486-3p | - | CD81     | CD81     |
| hsa-miR-486-3p | - | CEACAM21 | CEACAM21 |
| hsa-miR-486-3p | - | CEACAM3  | CEACAM3  |
| hsa-miR-486-3p | - | CENPM    | CENPM    |
| hsa-miR-486-3p | - | CHIT1    | CHIT1    |
| hsa-miR-486-3p | - | CIDEB    | CIDEB    |
| hsa-miR-486-3p | - | CITED4   | CITED4   |
| hsa-miR-486-3p | - | CKAP5    | CKAP5    |
| hsa-miR-486-3p | - | CLDN15   | CLDN15   |
| hsa-miR-486-3p | - | CLK2     | CLK2     |
| hsa-miR-486-3p | - | CNIH2    | CNIH2    |
| hsa-miR-486-3p | - | CNKSR1   | CNKSR1   |
| hsa-miR-486-3p | - | CNTNAP1  | CNTNAP1  |
| hsa-miR-486-3p | - | COL2A1   | COL2A1   |
| hsa-miR-486-3p | - | COL6A2   | COL6A2   |
| hsa-miR-486-3p | - | CRABP2   | CRABP2   |
| hsa-miR-486-3p | - | CRIP2    | CRIP2    |
| hsa-miR-486-3p | - | CRTAM    | CRTAM    |
| hsa-miR-486-3p | - | CTSA     | CTSA     |
| hsa-miR-486-3p | - | CTSF     | CTSF     |

|                |   |         |         |
|----------------|---|---------|---------|
| 3p             |   |         |         |
| hsa-miR-486-3p | - | DAB2IP  | DAB2IP  |
| hsa-miR-486-3p | - | DBP     | DBP     |
| hsa-miR-486-3p | - | DCBLD1  | DCBLD1  |
| hsa-miR-486-3p | - | DCTN1   | DCTN1   |
| hsa-miR-486-3p | - | DDB1    | DDB1    |
| hsa-miR-486-3p | - | DDB2    | DDB2    |
| hsa-miR-486-3p | - | DDX19B  | DDX19B  |
| hsa-miR-486-3p | - | DDX49   | DDX49   |
| hsa-miR-486-3p | - | DDX56   | DDX56   |
| hsa-miR-486-3p | - | DEF6    | DEF6    |
| hsa-miR-486-3p | - | DENND4B | DENND4B |
| hsa-miR-486-3p | - | DIABLO  | DIABLO  |
| hsa-miR-486-3p | - | DMKN    | DMKN    |
| hsa-miR-486-3p | - | DOC2A   | DOC2A   |
| hsa-miR-486-3p | - | DOCK6   | DOCK6   |
| hsa-miR-486-3p | - | DUSP2   | DUSP2   |
| hsa-miR-486-3p | - | DYNC1H1 | DYNC1H1 |
| hsa-miR-486-3p | - | ECEL1   | ECEL1   |
| hsa-miR-486-3p | - | ECM1    | ECM1    |
| hsa-miR-486-3p | - | EEFSEC  | EEFSEC  |
| hsa-miR-486-3p | - | EFTUD2  | EFTUD2  |
| hsa-miR-486-3p | - | EGFL8   | EGFL8   |
| hsa-miR-486-3p | - | EGLN2   | EGLN2   |
| hsa-miR-486-3p | - | ELAC2   | ELAC2   |
| hsa-miR-486-3p | - | EN1     | EN1     |
| hsa-miR-486-3p | - | ENG     | ENG     |
| hsa-miR-486-3p | - | ENSA    | ENSA    |
| hsa-miR-486-3p | - | EPHB2   | EPHB2   |

|                |   |         |         |
|----------------|---|---------|---------|
| 3p             |   |         |         |
| hsa-miR-486-3p | - | EPN1    | EPN1    |
| hsa-miR-486-3p | - | EPN3    | EPN3    |
| hsa-miR-486-3p | - | ESRRA   | ESRRA   |
| hsa-miR-486-3p | - | FAM131C | FAM131C |
| hsa-miR-486-3p | - | FAM63A  | FAM63A  |
| hsa-miR-486-3p | - | FBXL8   | FBXL8   |
| hsa-miR-486-3p | - | FBXO25  | FBXO25  |
| hsa-miR-486-3p | - | FCHO1   | FCHO1   |
| hsa-miR-486-3p | - | FCN1    | FCN1    |
| hsa-miR-486-3p | - | FGFR4   | FGFR4   |
| hsa-miR-486-3p | - | FHL3    | FHL3    |
| hsa-miR-486-3p | - | FLNC    | FLNC    |
| hsa-miR-486-3p | - | FLYWCH1 | FLYWCH1 |
| hsa-miR-486-3p | - | FYN     | FYN     |
| hsa-miR-486-3p | - | GAA     | GAA     |
| hsa-miR-486-3p | - | GDI1    | GDI1    |
| hsa-miR-486-3p | - | GFRA3   | GFRA3   |
| hsa-miR-486-3p | - | GNB3    | GNB3    |
| hsa-miR-486-3p | - | GNPDA1  | GNPDA1  |
| hsa-miR-486-3p | - | GPR89B  | GPR89B  |
| hsa-miR-486-3p | - | GRM2    | GRM2    |
| hsa-miR-486-3p | - | GRTP1   | GRTP1   |
| hsa-miR-486-3p | - | GSG2    | GSG2    |
| hsa-miR-486-3p | - | GSK3A   | GSK3A   |
| hsa-miR-486-3p | - | GSTZ1   | GSTZ1   |
| hsa-miR-486-3p | - | GYLTL1B | GYLTL1B |
| hsa-miR-486-3p | - | HAMP    | HAMP    |
| hsa-miR-486-3p | - | HCRTR1  | HCRTR1  |

|                |   |            |            |
|----------------|---|------------|------------|
| 3p             |   |            |            |
| hsa-miR-486-3p | - | HES2       | HES2       |
| hsa-miR-486-3p | - | HHLA3      | HHLA3      |
| hsa-miR-486-3p | - | HLA-DPB1   | HLA-DPB1   |
| hsa-miR-486-3p | - | HLA-DQB2   | HLA-DQB2   |
| hsa-miR-486-3p | - | HM13       | HM13       |
| hsa-miR-486-3p | - | HOXC5      | HOXC5      |
| hsa-miR-486-3p | - | HS6ST1     | HS6ST1     |
| hsa-miR-486-3p | - | HTRA3      | HTRA3      |
| hsa-miR-486-3p | - | IFITM5     | IFITM5     |
| hsa-miR-486-3p | - | IGFBP2     | IGFBP2     |
| hsa-miR-486-3p | - | IGSF9      | IGSF9      |
| hsa-miR-486-3p | - | IL1F7      | IL1F7      |
| hsa-miR-486-3p | - | IL27       | IL27       |
| hsa-miR-486-3p | - | INPPL1     | INPPL1     |
| hsa-miR-486-3p | - | ITGA5      | ITGA5      |
| hsa-miR-486-3p | - | KCNAB2     | KCNAB2     |
| hsa-miR-486-3p | - | KCND3      | KCND3      |
| hsa-miR-486-3p | - | KIF17      | KIF17      |
| hsa-miR-486-3p | - | KIRREL3    | KIRREL3    |
| hsa-miR-486-3p | - | KRT3       | KRT3       |
| hsa-miR-486-3p | - | KRT35      | KRT35      |
| hsa-miR-486-3p | - | KRT6C      | KRT6C      |
| hsa-miR-486-3p | - | KRT82      | KRT82      |
| hsa-miR-486-3p | - | KRTAP10-10 | KRTAP10-10 |
| hsa-miR-486-3p | - | LCN12      | LCN12      |
| hsa-miR-486-3p | - | LDB1       | LDB1       |
| hsa-miR-486-3p | - | LENEP      | LENEP      |
| hsa-miR-486-3p | - | LILRB1     | LILRB1     |

|                |   |           |           |
|----------------|---|-----------|-----------|
| 3p             |   |           |           |
| hsa-miR-486-3p | - | LILRB5    | LILRB5    |
| hsa-miR-486-3p | - | LINGO2    | LINGO2    |
| hsa-miR-486-3p | - | LOC388564 | LOC388564 |
| hsa-miR-486-3p | - | LRP6      | LRP6      |
| hsa-miR-486-3p | - | LRRC61    | LRRC61    |
| hsa-miR-486-3p | - | LTF       | LTF       |
| hsa-miR-486-3p | - | LY6G6C    | LY6G6C    |
| hsa-miR-486-3p | - | MAG       | MAG       |
| hsa-miR-486-3p | - | MAP1LC3A  | MAP1LC3A  |
| hsa-miR-486-3p | - | MAP3K10   | MAP3K10   |
| hsa-miR-486-3p | - | MAP4K2    | MAP4K2    |
| hsa-miR-486-3p | - | MAP7D1    | MAP7D1    |
| hsa-miR-486-3p | - | MAPK15    | MAPK15    |
| hsa-miR-486-3p | - | MAST2     | MAST2     |
| hsa-miR-486-3p | - | MBD6      | MBD6      |
| hsa-miR-486-3p | - | MCF2L     | MCF2L     |
| hsa-miR-486-3p | - | MCM5      | MCM5      |
| hsa-miR-486-3p | - | MED11     | MED11     |
| hsa-miR-486-3p | - | MFAP2     | MFAP2     |
| hsa-miR-486-3p | - | MIB2      | MIB2      |
| hsa-miR-486-3p | - | MLPH      | MLPH      |
| hsa-miR-486-3p | - | MOV10     | MOV10     |
| hsa-miR-486-3p | - | MRPL18    | MRPL18    |
| hsa-miR-486-3p | - | MRPL40    | MRPL40    |
| hsa-miR-486-3p | - | MT1JP     | MT1JP     |
| hsa-miR-486-3p | - | MXD3      | MXD3      |
| hsa-miR-486-3p | - | MYH7B     | MYH7B     |
| hsa-miR-486-3p | - | MYL2      | MYL2      |

|                |   |        |        |
|----------------|---|--------|--------|
| 3p             |   |        |        |
| hsa-miR-486-3p | - | MYL4   | MYL4   |
| hsa-miR-486-3p | - | MYO7B  | MYO7B  |
| hsa-miR-486-3p | - | NCAPH2 | NCAPH2 |
| hsa-miR-486-3p | - | NEDD8  | NEDD8  |
| hsa-miR-486-3p | - | NFKB2  | NFKB2  |
| hsa-miR-486-3p | - | NFRKB  | NFRKB  |
| hsa-miR-486-3p | - | NIT1   | NIT1   |
| hsa-miR-486-3p | - | NKX2-5 | NKX2-5 |
| hsa-miR-486-3p | - | NME4   | NME4   |
| hsa-miR-486-3p | - | NPC1L1 | NPC1L1 |
| hsa-miR-486-3p | - | NR1D1  | NR1D1  |
| hsa-miR-486-3p | - | NR2F1  | NR2F1  |
| hsa-miR-486-3p | - | NSD1   | NSD1   |
| hsa-miR-486-3p | - | NT5DC2 | NT5DC2 |
| hsa-miR-486-3p | - | NUF2   | NUF2   |
| hsa-miR-486-3p | - | OBSL1  | OBSL1  |
| hsa-miR-486-3p | - | ODF3L1 | ODF3L1 |
| hsa-miR-486-3p | - | ODZ4   | ODZ4   |
| hsa-miR-486-3p | - | OGDH   | OGDH   |
| hsa-miR-486-3p | - | OLFM1  | OLFM1  |
| hsa-miR-486-3p | - | OLFML3 | OLFML3 |
| hsa-miR-486-3p | - | OR2H2  | OR2H2  |
| hsa-miR-486-3p | - | OTOF   | OTOF   |
| hsa-miR-486-3p | - | P4HA3  | P4HA3  |
| hsa-miR-486-3p | - | PADI6  | PADI6  |
| hsa-miR-486-3p | - | PELI3  | PELI3  |
| hsa-miR-486-3p | - | PER1   | PER1   |
| hsa-miR-486-3p | - | PES1   | PES1   |

|                |   |          |          |
|----------------|---|----------|----------|
| 3p             |   |          |          |
| hsa-miR-486-3p | - | PFKP     | PFKP     |
| hsa-miR-486-3p | - | PHYHD1   | PHYHD1   |
| hsa-miR-486-3p | - | PIF1     | PIF1     |
| hsa-miR-486-3p | - | PIGQ     | PIGQ     |
| hsa-miR-486-3p | - | PLCD3    | PLCD3    |
| hsa-miR-486-3p | - | PLCH2    | PLCH2    |
| hsa-miR-486-3p | - | PLD3     | PLD3     |
| hsa-miR-486-3p | - | PLEKHG5  | PLEKHG5  |
| hsa-miR-486-3p | - | PLUNC    | PLUNC    |
| hsa-miR-486-3p | - | PNPLA6   | PNPLA6   |
| hsa-miR-486-3p | - | POLM     | POLM     |
| hsa-miR-486-3p | - | POU2F2   | POU2F2   |
| hsa-miR-486-3p | - | PPIH     | PPIH     |
| hsa-miR-486-3p | - | PPP1R12C | PPP1R12C |
| hsa-miR-486-3p | - | PPP1R14A | PPP1R14A |
| hsa-miR-486-3p | - | PPP1R14B | PPP1R14B |
| hsa-miR-486-3p | - | PRAP1    | PRAP1    |
| hsa-miR-486-3p | - | PRDM6    | PRDM6    |
| hsa-miR-486-3p | - | PRDX2    | PRDX2    |
| hsa-miR-486-3p | - | PRR12    | PRR12    |
| hsa-miR-486-3p | - | PTGDS    | PTGDS    |
| hsa-miR-486-3p | - | PVALB    | PVALB    |
| hsa-miR-486-3p | - | PXMP2    | PXMP2    |
| hsa-miR-486-3p | - | RABAC1   | RABAC1   |
| hsa-miR-486-3p | - | RAF1     | RAF1     |
| hsa-miR-486-3p | - | RARA     | RARA     |
| hsa-miR-486-3p | - | REEP4    | REEP4    |
| hsa-miR-486-3p | - | RHOG     | RHOG     |



|                |   |          |          |
|----------------|---|----------|----------|
| 3p             |   |          |          |
| hsa-miR-486-3p | - | RILP     | RILP     |
| hsa-miR-486-3p | - | RIPK3    | RIPK3    |
| hsa-miR-486-3p | - | RPL3L    | RPL3L    |
| hsa-miR-486-3p | - | RPS6KB2  | RPS6KB2  |
| hsa-miR-486-3p | - | RRAD     | RRAD     |
| hsa-miR-486-3p | - | RUSC2    | RUSC2    |
| hsa-miR-486-3p | - | S100A10  | S100A10  |
| hsa-miR-486-3p | - | SCLY     | SCLY     |
| hsa-miR-486-3p | - | SCN1B    | SCN1B    |
| hsa-miR-486-3p | - | SEC13    | SEC13    |
| hsa-miR-486-3p | - | SEC61A2  | SEC61A2  |
| hsa-miR-486-3p | - | SERPINF1 | SERPINF1 |
| hsa-miR-486-3p | - | SF3A2    | SF3A2    |
| hsa-miR-486-3p | - | SH3BGRL3 | SH3BGRL3 |
| hsa-miR-486-3p | - | SHBG     | SHBG     |
| hsa-miR-486-3p | - | SHMT1    | SHMT1    |
| hsa-miR-486-3p | - | SIPA1L1  | SIPA1L1  |
| hsa-miR-486-3p | - | SIRT3    | SIRT3    |
| hsa-miR-486-3p | - | SLC13A3  | SLC13A3  |
| hsa-miR-486-3p | - | SLC16A8  | SLC16A8  |
| hsa-miR-486-3p | - | SLC25A39 | SLC25A39 |
| hsa-miR-486-3p | - | SLC35A2  | SLC35A2  |
| hsa-miR-486-3p | - | SLC7A10  | SLC7A10  |
| hsa-miR-486-3p | - | SMOX     | SMOX     |
| hsa-miR-486-3p | - | SNAI3    | SNAI3    |
| hsa-miR-486-3p | - | SNCA     | SNCA     |
| hsa-miR-486-3p | - | SPATA20  | SPATA20  |
| hsa-miR-486-3p | - | SPDEF    | SPDEF    |

|                |   |          |          |
|----------------|---|----------|----------|
| 3p             |   |          |          |
| hsa-miR-486-3p | - | SPNS3    | SPNS3    |
| hsa-miR-486-3p | - | SPTAN1   | SPTAN1   |
| hsa-miR-486-3p | - | STARD3   | STARD3   |
| hsa-miR-486-3p | - | STIM1    | STIM1    |
| hsa-miR-486-3p | - | STIP1    | STIP1    |
| hsa-miR-486-3p | - | TAGLN    | TAGLN    |
| hsa-miR-486-3p | - | TBC1D10B | TBC1D10B |
| hsa-miR-486-3p | - | TBC1D22A | TBC1D22A |
| hsa-miR-486-3p | - | TBCB     | TBCB     |
| hsa-miR-486-3p | - | TH       | TH       |
| hsa-miR-486-3p | - | TIAM1    | TIAM1    |
| hsa-miR-486-3p | - | TIE1     | TIE1     |
| hsa-miR-486-3p | - | TK1      | TK1      |
| hsa-miR-486-3p | - | TMEM129  | TMEM129  |
| hsa-miR-486-3p | - | TMEM132A | TMEM132A |
| hsa-miR-486-3p | - | TMEM132E | TMEM132E |
| hsa-miR-486-3p | - | TMEM79   | TMEM79   |
| hsa-miR-486-3p | - | TMSL3    | TMSL3    |
| hsa-miR-486-3p | - | TNFRSF4  | TNFRSF4  |
| hsa-miR-486-3p | - | TNNT2    | TNNT2    |
| hsa-miR-486-3p | - | TOM1     | TOM1     |
| hsa-miR-486-3p | - | TP53I3   | TP53I3   |
| hsa-miR-486-3p | - | TRAIP    | TRAIP    |
| hsa-miR-486-3p | - | TRAPPC3  | TRAPPC3  |
| hsa-miR-486-3p | - | TRIM62   | TRIM62   |
| hsa-miR-486-3p | - | TRIP10   | TRIP10   |
| hsa-miR-486-3p | - | TSKU     | TSKU     |
| hsa-miR-486-3p | - | TYRO3    | TYRO3    |

|                |   |          |          |
|----------------|---|----------|----------|
| 3p             |   |          |          |
| hsa-miR-486-3p | - | UBL5     | UBL5     |
| hsa-miR-486-3p | - | UCP2     | UCP2     |
| hsa-miR-486-3p | - | UFD1L    | UFD1L    |
| hsa-miR-486-3p | - | UNC45A   | UNC45A   |
| hsa-miR-486-3p | - | USP19    | USP19    |
| hsa-miR-486-3p | - | USP5     | USP5     |
| hsa-miR-486-3p | - | USP7     | USP7     |
| hsa-miR-486-3p | - | VAX2     | VAX2     |
| hsa-miR-486-3p | - | WDR86    | WDR86    |
| hsa-miR-486-3p | - | WNT1     | WNT1     |
| hsa-miR-486-3p | - | YEATS4   | YEATS4   |
| hsa-miR-486-3p | - | ZBTB7B   | ZBTB7B   |
| hsa-miR-486-3p | - | ZC3H12A  | ZC3H12A  |
| hsa-miR-486-3p | - | ZDHHC24  | ZDHHC24  |
| hsa-miR-486-3p | - | ZFPL1    | ZFPL1    |
| hsa-miR-486-3p | - | ZMYND10  | ZMYND10  |
| hsa-miR-486-3p | - | ZNF444   | ZNF444   |
| hsa-miR-486-3p | - | ZNF496   | ZNF496   |
| hsa-miR-486-3p | - | ZNF579   | ZNF579   |
| hsa-miR-486-3p | - | ZNF593   | ZNF593   |
| hsa-miR-486-3p | - | ZNF76    | ZNF76    |
| hsa-miR-487b   | - | AGA      | AGA      |
| hsa-miR-487b   | - | ALDH1A3  | ALDH1A3  |
| hsa-miR-487b   | - | ANP32E   | ANP32E   |
| hsa-miR-487b   | - | ARMCX1   | ARMCX1   |
| hsa-miR-487b   | - | ATP10A   | ATP10A   |
| hsa-miR-487b   | - | C1QL3    | C1QL3    |
| hsa-miR-487b   | - | C20orf26 | C20orf26 |
| hsa-miR-487b   | - | C4orf32  | C4orf32  |
| hsa-miR-487b   | - | CALB2    | CALB2    |
| hsa-miR-487b   | - | CCDC46   | CCDC46   |
| hsa-miR-487b   | - | CDKN2AIP | CDKN2AIP |
| hsa-miR-487b   | - | CEP192   | CEP192   |

|              |        |         |         |
|--------------|--------|---------|---------|
| hsa-miR-487b | -      | CLIP1   | CLIP1   |
| hsa-miR-487b | -      | CPNE5   | CPNE5   |
| hsa-miR-487b | -      | CR1L    | CR1L    |
| hsa-miR-487b | -      | CRYBA1  | CRYBA1  |
| hsa-miR-487b | -      | DIABLO  | DIABLO  |
| hsa-miR-487b | -      | DIO2    | DIO2    |
| hsa-miR-487b | EFHD2  | EFHD2   | -       |
| hsa-miR-487b | -      | ELF2    | ELF2    |
| hsa-miR-487b | EPHA3  | EPHA3   | -       |
| hsa-miR-487b | -      | FABP7   | FABP7   |
| hsa-miR-487b | -      | FAM59A  | FAM59A  |
| hsa-miR-487b | -      | FHAD1   | FHAD1   |
| hsa-miR-487b | -      | FPGT    | FPGT    |
| hsa-miR-487b | -      | GFPT1   | GFPT1   |
| hsa-miR-487b | -      | GRIA2   | GRIA2   |
| hsa-miR-487b | -      | GRM3    | GRM3    |
| hsa-miR-487b | -      | HDAC8   | HDAC8   |
| hsa-miR-487b | -      | HERPUD1 | HERPUD1 |
| hsa-miR-487b | -      | HSPA1B  | HSPA1B  |
| hsa-miR-487b | -      | IDS     | IDS     |
| hsa-miR-487b | -      | IL22RA1 | IL22RA1 |
| hsa-miR-487b | IRS1   | IRS1    | -       |
| hsa-miR-487b | -      | IRX3    | IRX3    |
| hsa-miR-487b | -      | ITSN1   | ITSN1   |
| hsa-miR-487b | -      | LAPTM4B | LAPTM4B |
| hsa-miR-487b | -      | LHX9    | LHX9    |
| hsa-miR-487b | -      | LRCH1   | LRCH1   |
| hsa-miR-487b | -      | MBD5    | MBD5    |
| hsa-miR-487b | -      | MLL5    | MLL5    |
| hsa-miR-487b | -      | MYST4   | MYST4   |
| hsa-miR-487b | -      | NLGN4X  | NLGN4X  |
| hsa-miR-487b | NRARP  | NRARP   | -       |
| hsa-miR-487b | -      | OSMR    | OSMR    |
| hsa-miR-487b | -      | PAK7    | PAK7    |
| hsa-miR-487b | -      | PARP16  | PARP16  |
| hsa-miR-487b | PCDH7  | PCDH7   | -       |
| hsa-miR-487b | -      | PCF11   | PCF11   |
| hsa-miR-487b | PLXNB2 | -       | PLXNB2  |
| hsa-miR-487b | -      | PSMC1   | PSMC1   |
| hsa-miR-487b | -      | PSME4   | PSME4   |
| hsa-miR-487b | RNF165 | RNF165  | -       |
| hsa-miR-487b | -      | SAMD12  | SAMD12  |
| hsa-miR-487b | -      | SEMA4D  | SEMA4D  |
| hsa-miR-487b | -      | SFTPA1  | SFTPA1  |
| hsa-miR-487b | -      | SLC15A4 | SLC15A4 |
| hsa-miR-487b | -      | SLC26A3 | SLC26A3 |
| hsa-miR-487b | -      | SLC26A7 | SLC26A7 |
| hsa-miR-487b | -      | SLC7A3  | SLC7A3  |
| hsa-miR-487b | -      | SMAP1   | SMAP1   |
| hsa-miR-487b | -      | SNAP91  | SNAP91  |
| hsa-miR-487b | -      | SP3     | SP3     |

|              |          |          |          |
|--------------|----------|----------|----------|
| hsa-miR-487b | -        | SRP9     | SRP9     |
| hsa-miR-487b | -        | SSX3     | SSX3     |
| hsa-miR-487b | -        | STAM     | STAM     |
| hsa-miR-487b | -        | STK24    | STK24    |
| hsa-miR-487b | -        | TSPAN2   | TSPAN2   |
| hsa-miR-487b | -        | TSPAN3   | TSPAN3   |
| hsa-miR-487b | -        | USP25    | USP25    |
| hsa-miR-487b | -        | WARS2    | WARS2    |
| hsa-miR-487b | -        | ZIC1     | ZIC1     |
| hsa-miR-487b | -        | ZNF638   | ZNF638   |
| hsa-miR-487b | -        | ZRANB1   | ZRANB1   |
| hsa-miR-493  | AADACL3  | AADACL3  | -        |
| hsa-miR-493  | ABCB5    | ABCB5    | -        |
| hsa-miR-493  | ABCB8    | -        | ABCB8    |
| hsa-miR-493  | ABCF2    | ABCF2    | -        |
| hsa-miR-493  | ACACA    | ACACA    | -        |
| hsa-miR-493  | ACCN5    | ACCN5    | -        |
| hsa-miR-493  | ACTN2    | ACTN2    | -        |
| hsa-miR-493  | ADAM33   | ADAM33   | -        |
| hsa-miR-493  | ADAMTS9  | ADAMTS9  | -        |
| hsa-miR-493  | ADAMTSL4 | -        | ADAMTSL4 |
| hsa-miR-493  | ADAR     | ADAR     | -        |
| hsa-miR-493  | ADCY3    | ADCY3    | -        |
| hsa-miR-493  | ADCY7    | ADCY7    | -        |
| hsa-miR-493  | ADCYAP1  | ADCYAP1  | -        |
| hsa-miR-493  | ADD2     | ADD2     | -        |
| hsa-miR-493  | ADORA1   | ADORA1   | -        |
| hsa-miR-493  | AEBP2    | AEBP2    | -        |
| hsa-miR-493  | AFF1     | AFF1     | -        |
| hsa-miR-493  | AGTR2    | AGTR2    | -        |
| hsa-miR-493  | AHSP     | AHSP     | -        |
| hsa-miR-493  | AK2      | AK2      | -        |
| hsa-miR-493  | AKT2     | AKT2     | -        |
| hsa-miR-493  | ALAD     | ALAD     | -        |
| hsa-miR-493  | ALDH1A3  | ALDH1A3  | -        |
| hsa-miR-493  | ALG9     | ALG9     | -        |
| hsa-miR-493  | -        | ALOX12P2 | ALOX12P2 |
| hsa-miR-493  | ALS2CL   | ALS2CL   | -        |
| hsa-miR-493  | AMMECR1  | AMMECR1  | -        |
| hsa-miR-493  | AMOT     | AMOT     | -        |
| hsa-miR-493  | AMPD3    | AMPD3    | -        |
| hsa-miR-493  | AMZ1     | AMZ1     | -        |
| hsa-miR-493  | AMZ2     | AMZ2     | -        |
| hsa-miR-493  | ANGPTL2  | ANGPTL2  | -        |
| hsa-miR-493  | ANKRD1   | ANKRD1   | -        |
| hsa-miR-493  | -        | ANKRD10  | ANKRD10  |
| hsa-miR-493  | ANKRD11  | ANKRD11  | -        |
| hsa-miR-493  | ANKRD17  | ANKRD17  | -        |
| hsa-miR-493  | ANKRD26  | ANKRD26  | -        |
| hsa-miR-493  | ANKRD29  | ANKRD29  | -        |
| hsa-miR-493  | ANKRD34C | ANKRD34C | -        |

|             |          |           |           |
|-------------|----------|-----------|-----------|
| hsa-miR-493 | ANO7     | ANO7      | -         |
| hsa-miR-493 | ANP32A   | ANP32A    | -         |
| hsa-miR-493 | ANTXR1   | ANTXR1    | -         |
| hsa-miR-493 | ANXA7    | ANXA7     | -         |
| hsa-miR-493 | APOOL    | -         | APOOL     |
| hsa-miR-493 | ARFIP2   | ARFIP2    | -         |
| hsa-miR-493 | -        | ARHGAP28  | ARHGAP28  |
| hsa-miR-493 | ARHGAP31 | ARHGAP31  | -         |
| hsa-miR-493 | ARID1B   | ARID1B    | -         |
| hsa-miR-493 | ARL17A   | ARL17A    | -         |
| hsa-miR-493 | ARL17B   | ARL17B    | -         |
| hsa-miR-493 | ART1     | -         | ART1      |
| hsa-miR-493 | ARX      | ARX       | -         |
| hsa-miR-493 | ASAH1    | ASAH1     | -         |
| hsa-miR-493 | ASB1     | ASB1      | -         |
| hsa-miR-493 | -        | ASB16     | ASB16     |
| hsa-miR-493 | ASPH     | ASPH      | -         |
| hsa-miR-493 | ATG16L1  | ATG16L1   | -         |
| hsa-miR-493 | ATP2B1   | ATP2B1    | -         |
| hsa-miR-493 | -        | ATP2C2    | ATP2C2    |
| hsa-miR-493 | ATP6V1C2 | ATP6V1C2  | -         |
| hsa-miR-493 | ATP6V1G1 | ATP6V1G1  | -         |
| hsa-miR-493 | ATP6V1G2 | ATP6V1G2  | -         |
| hsa-miR-493 | ATP7B    | ATP7B     | -         |
| hsa-miR-493 | ATPAF1   | ATPAF1    | -         |
| hsa-miR-493 | ATPBD4   | ATPBD4    | -         |
| hsa-miR-493 | AVPR2    | -         | AVPR2     |
| hsa-miR-493 | BAALC    | BAALC     | -         |
| hsa-miR-493 | BAAT     | BAAT      | -         |
| hsa-miR-493 | BARX2    | BARX2     | -         |
| hsa-miR-493 | BASP1    | BASP1     | -         |
| hsa-miR-493 | BBC3     | -         | BBC3      |
| hsa-miR-493 | BCL11A   | BCL11A    | -         |
| hsa-miR-493 | BCL2L13  | BCL2L13   | -         |
| hsa-miR-493 | -        | BCL6B     | BCL6B     |
| hsa-miR-493 | BEND7    | BEND7     | -         |
| hsa-miR-493 | BICD2    | BICD2     | -         |
| hsa-miR-493 | -        | BMP4      | BMP4      |
| hsa-miR-493 | BMP7     | BMP7      | -         |
| hsa-miR-493 | BNIP3L   | BNIP3L    | -         |
| hsa-miR-493 | BOC      | BOC       | -         |
| hsa-miR-493 | BOD1     | BOD1      | -         |
| hsa-miR-493 | BRD9     | BRD9      | -         |
| hsa-miR-493 | BRPF3    | -         | BRPF3     |
| hsa-miR-493 | BSDC1    | BSDC1     | -         |
| hsa-miR-493 | BTBD1    | BTBD1     | -         |
| hsa-miR-493 | C10orf11 | C10orf11  | -         |
| hsa-miR-493 | -        | C10orf119 | C10orf119 |
| hsa-miR-493 | C11orf41 | C11orf41  | -         |
| hsa-miR-493 | C11orf57 | C11orf57  | -         |
| hsa-miR-493 | C11orf88 | C11orf88  | -         |

|             |           |           |          |
|-------------|-----------|-----------|----------|
| hsa-miR-493 | C12orf51  | C12orf51  | -        |
| hsa-miR-493 | C12orf66  | C12orf66  | -        |
| hsa-miR-493 | C14orf180 | C14orf180 | -        |
| hsa-miR-493 | C15orf23  | C15orf23  | -        |
| hsa-miR-493 | C15orf27  | C15orf27  | -        |
| hsa-miR-493 | C16orf78  | -         | C16orf78 |
| hsa-miR-493 | C16orf82  | C16orf82  | -        |
| hsa-miR-493 | C17orf50  | C17orf50  | -        |
| hsa-miR-493 | C17orf58  | C17orf58  | -        |
| hsa-miR-493 | C18orf25  | C18orf25  | -        |
| hsa-miR-493 | C18orf54  | C18orf54  | -        |
| hsa-miR-493 | C19orf38  | C19orf38  | -        |
| hsa-miR-493 | C1RL      | C1RL      | -        |
| hsa-miR-493 | C1orf144  | C1orf144  | -        |
| hsa-miR-493 | C1orf185  | C1orf185  | -        |
| hsa-miR-493 | C1orf190  | C1orf190  | -        |
| hsa-miR-493 | C1orf198  | C1orf198  | -        |
| hsa-miR-493 | -         | C1orf43   | C1orf43  |
| hsa-miR-493 | C20orf118 | C20orf118 | -        |
| hsa-miR-493 | C20orf194 | C20orf194 | -        |
| hsa-miR-493 | C20orf202 | C20orf202 | -        |
| hsa-miR-493 | -         | C21orf34  | C21orf34 |
| hsa-miR-493 | -         | C21orf45  | C21orf45 |
| hsa-miR-493 | -         | C21orf94  | C21orf94 |
| hsa-miR-493 | -         | C2orf24   | C2orf24  |
| hsa-miR-493 | C2orf3    | C2orf3    | -        |
| hsa-miR-493 | -         | C2orf47   | C2orf47  |
| hsa-miR-493 | -         | C2orf52   | C2orf52  |
| hsa-miR-493 | C2orf63   | C2orf63   | -        |
| hsa-miR-493 | C2orf68   | C2orf68   | -        |
| hsa-miR-493 | -         | C2orf7    | C2orf7   |
| hsa-miR-493 | C3orf18   | C3orf18   | -        |
| hsa-miR-493 | C6orf105  | C6orf105  | -        |
| hsa-miR-493 | C6orf47   | C6orf47   | -        |
| hsa-miR-493 | -         | C6orf48   | C6orf48  |
| hsa-miR-493 | C9        | C9        | -        |
| hsa-miR-493 | -         | C9orf86   | C9orf86  |
| hsa-miR-493 | C9orf89   | C9orf89   | -        |
| hsa-miR-493 | C9orf95   | C9orf95   | -        |
| hsa-miR-493 | CADPS     | CADPS     | -        |
| hsa-miR-493 | -         | CALCA     | CALCA    |
| hsa-miR-493 | -         | CALCOCO1  | CALCOCO1 |
| hsa-miR-493 | CALCOCO2  | CALCOCO2  | -        |
| hsa-miR-493 | CALCRL    | CALCRL    | -        |
| hsa-miR-493 | CALM1     | CALM1     | -        |
| hsa-miR-493 | CALML4    | -         | CALML4   |
| hsa-miR-493 | CAMK1D    | CAMK1D    | -        |
| hsa-miR-493 | CAMK2G    | CAMK2G    | -        |
| hsa-miR-493 | CAMKK2    | CAMKK2    | -        |
| hsa-miR-493 | CAMLG     | CAMLG     | -        |
| hsa-miR-493 | CAPN6     | CAPN6     | -        |

|             |         |         |        |
|-------------|---------|---------|--------|
| hsa-miR-493 | CASP2   | -       | CASP2  |
| hsa-miR-493 | CAV1    | CAV1    | -      |
| hsa-miR-493 | CBFA2T2 | CBFA2T2 | -      |
| hsa-miR-493 | CCDC59  | CCDC59  | -      |
| hsa-miR-493 | -       | CCDC65  | CCDC65 |
| hsa-miR-493 | CCDC76  | CCDC76  | -      |
| hsa-miR-493 | CCDC85A | CCDC85A | -      |
| hsa-miR-493 | CCDC88A | CCDC88A | -      |
| hsa-miR-493 | CCDC91  | CCDC91  | -      |
| hsa-miR-493 | -       | CCM2    | CCM2   |
| hsa-miR-493 | CCNG1   | CCNG1   | -      |
| hsa-miR-493 | CCNYL1  | CCNYL1  | -      |
| hsa-miR-493 | CCPG1   | CCPG1   | -      |
| hsa-miR-493 | CD209   | CD209   | -      |
| hsa-miR-493 | CD36    | CD36    | -      |
| hsa-miR-493 | -       | CD72    | CD72   |
| hsa-miR-493 | -       | CD99    | CD99   |
| hsa-miR-493 | CDC42   | CDC42   | -      |
| hsa-miR-493 | CDC45   | CDC45   | -      |
| hsa-miR-493 | CDH23   | CDH23   | -      |
| hsa-miR-493 | CDK12   | CDK12   | -      |
| hsa-miR-493 | CECR6   | -       | CECR6  |
| hsa-miR-493 | CELA1   | CELA1   | -      |
| hsa-miR-493 | CELF1   | CELF1   | -      |
| hsa-miR-493 | CELF2   | CELF2   | -      |
| hsa-miR-493 | CELF3   | CELF3   | -      |
| hsa-miR-493 | CELF5   | CELF5   | -      |
| hsa-miR-493 | -       | CENPI   | CENPI  |
| hsa-miR-493 | CFL1    | CFL1    | -      |
| hsa-miR-493 | CFP     | CFP     | -      |
| hsa-miR-493 | CGNL1   | CGNL1   | -      |
| hsa-miR-493 | CHAD    | CHAD    | -      |
| hsa-miR-493 | CHERP   | CHERP   | -      |
| hsa-miR-493 | CHIT1   | -       | CHIT1  |
| hsa-miR-493 | CHL1    | CHL1    | -      |
| hsa-miR-493 | CHML    | CHML    | -      |
| hsa-miR-493 | -       | CHN2    | CHN2   |
| hsa-miR-493 | CIAO1   | CIAO1   | -      |
| hsa-miR-493 | CLCF1   | CLCF1   | -      |
| hsa-miR-493 | CLDN1   | CLDN1   | -      |
| hsa-miR-493 | CLDN5   | -       | CLDN5  |
| hsa-miR-493 | CLEC16A | CLEC16A | -      |
| hsa-miR-493 | CLEC4F  | -       | CLEC4F |
| hsa-miR-493 | CLIC2   | CLIC2   | -      |
| hsa-miR-493 | CLIC4   | CLIC4   | -      |
| hsa-miR-493 | CLIP3   | CLIP3   | -      |
| hsa-miR-493 | CLN5    | CLN5    | -      |
| hsa-miR-493 | CMKLR1  | CMKLR1  | -      |
| hsa-miR-493 | CMTM6   | CMTM6   | -      |
| hsa-miR-493 | CNDP2   | CNDP2   | -      |
| hsa-miR-493 | CNGB1   | CNGB1   | -      |



|             |          |          |         |
|-------------|----------|----------|---------|
| hsa-miR-493 | CNN2     | CNN2     | -       |
| hsa-miR-493 | CNNM2    | CNNM2    | -       |
| hsa-miR-493 | CNOT6    | CNOT6    | -       |
| hsa-miR-493 | CNOT6L   | CNOT6L   | -       |
| hsa-miR-493 | COG5     | COG5     | -       |
| hsa-miR-493 | COG6     | COG6     | -       |
| hsa-miR-493 | COL5A1   | COL5A1   | -       |
| hsa-miR-493 | COL6A6   | COL6A6   | -       |
| hsa-miR-493 | COL9A2   | COL9A2   | -       |
| hsa-miR-493 | COL9A3   | COL9A3   | -       |
| hsa-miR-493 | COMMD2   | COMMD2   | -       |
| hsa-miR-493 | CORIN    | CORIN    | -       |
| hsa-miR-493 | CPLX1    | CPLX1    | -       |
| hsa-miR-493 | -        | CR1L     | CR1L    |
| hsa-miR-493 | CREB1    | CREB1    | -       |
| hsa-miR-493 | CRISP3   | CRISP3   | -       |
| hsa-miR-493 | CRISPLD1 | CRISPLD1 | -       |
| hsa-miR-493 | CSDE1    | CSDE1    | -       |
| hsa-miR-493 | CST9     | CST9     | -       |
| hsa-miR-493 | CTDSP2   | CTDSP2   | -       |
| hsa-miR-493 | CTLA4    | CTLA4    | -       |
| hsa-miR-493 | CTSO     | CTSO     | -       |
| hsa-miR-493 | CX3CL1   | CX3CL1   | -       |
| hsa-miR-493 | CXCL12   | CXCL12   | -       |
| hsa-miR-493 | -        | CXorf22  | CXorf22 |
| hsa-miR-493 | CXorf38  | -        | CXorf38 |
| hsa-miR-493 | CYB561   | CYB561   | -       |
| hsa-miR-493 | CYB5A    | CYB5A    | -       |
| hsa-miR-493 | CYB5RL   | CYB5RL   | -       |
| hsa-miR-493 | CYP24A1  | CYP24A1  | -       |
| hsa-miR-493 | CYP7B1   | CYP7B1   | -       |
| hsa-miR-493 | CYR61    | CYR61    | -       |
| hsa-miR-493 | DAPK2    | DAPK2    | -       |
| hsa-miR-493 | DCAF5    | DCAF5    | -       |
| hsa-miR-493 | DCAF6    | DCAF6    | -       |
| hsa-miR-493 | DCLK3    | DCLK3    | -       |
| hsa-miR-493 | DDX3Y    | DDX3Y    | -       |
| hsa-miR-493 | DDX54    | DDX54    | -       |
| hsa-miR-493 | DDX6     | DDX6     | -       |
| hsa-miR-493 | DENND4C  | DENND4C  | -       |
| hsa-miR-493 | DENND5B  | DENND5B  | -       |
| hsa-miR-493 | DGKG     | DGKG     | -       |
| hsa-miR-493 | DKK1     | DKK1     | -       |
| hsa-miR-493 | DLG3     | DLG3     | -       |
| hsa-miR-493 | DLX1     | DLX1     | -       |
| hsa-miR-493 | -        | DMD      | DMD     |
| hsa-miR-493 | DNAJC1   | DNAJC1   | -       |
| hsa-miR-493 | DNAL1    | DNAL1    | -       |
| hsa-miR-493 | DNER     | DNER     | -       |
| hsa-miR-493 | DOK4     | DOK4     | -       |
| hsa-miR-493 | -        | DONSON   | DONSON  |

|             |          |          |         |
|-------------|----------|----------|---------|
| hsa-miR-493 | DPCR1    | DPCR1    | -       |
| hsa-miR-493 | DPPA4    | DPPA4    | -       |
| hsa-miR-493 | DPY19L4  | DPY19L4  | -       |
| hsa-miR-493 | DPY30    | DPY30    | -       |
| hsa-miR-493 | DPYD     | DPYD     | -       |
| hsa-miR-493 | -        | DPYS     | DPYS    |
| hsa-miR-493 | DRD2     | DRD2     | -       |
| hsa-miR-493 | DSG1     | DSG1     | -       |
| hsa-miR-493 | DTX4     | DTX4     | -       |
| hsa-miR-493 | DUSP6    | DUSP6    | -       |
| hsa-miR-493 | DUSP8    | -        | DUSP8   |
| hsa-miR-493 | -        | DYNLRB2  | DYNLRB2 |
| hsa-miR-493 | DZIP1    | DZIP1    | -       |
| hsa-miR-493 | EAPP     | EAPP     | -       |
| hsa-miR-493 | EARS2    | EARS2    | -       |
| hsa-miR-493 | -        | EBPL     | EBPL    |
| hsa-miR-493 | ECE2     | ECE2     | -       |
| hsa-miR-493 | ECM2     | ECM2     | -       |
| hsa-miR-493 | EDA      | EDA      | -       |
| hsa-miR-493 | EDA2R    | EDA2R    | -       |
| hsa-miR-493 | EDN1     | EDN1     | -       |
| hsa-miR-493 | EEF1A1   | EEF1A1   | -       |
| hsa-miR-493 | EFCAB1   | EFCAB1   | -       |
| hsa-miR-493 | EFNA2    | -        | EFNA2   |
| hsa-miR-493 | EFNA5    | EFNA5    | -       |
| hsa-miR-493 | EID1     | EID1     | -       |
| hsa-miR-493 | EIF2C3   | EIF2C3   | -       |
| hsa-miR-493 | EIF2S3   | EIF2S3   | -       |
| hsa-miR-493 | EIF4G2   | EIF4G2   | -       |
| hsa-miR-493 | EIF5AL1  | EIF5AL1  | -       |
| hsa-miR-493 | ELOVL7   | ELOVL7   | -       |
| hsa-miR-493 | EML4     | EML4     | -       |
| hsa-miR-493 | ENPP6    | ENPP6    | -       |
| hsa-miR-493 | ENTPD1   | -        | ENTPD1  |
| hsa-miR-493 | EPB41L4B | EPB41L4B | -       |
| hsa-miR-493 | EPC2     | EPC2     | -       |
| hsa-miR-493 | -        | EPHA7    | EPHA7   |
| hsa-miR-493 | EPHB1    | EPHB1    | -       |
| hsa-miR-493 | EPHB3    | EPHB3    | -       |
| hsa-miR-493 | EPHX3    | EPHX3    | -       |
| hsa-miR-493 | EPM2AIP1 | EPM2AIP1 | -       |
| hsa-miR-493 | EPS8     | EPS8     | -       |
| hsa-miR-493 | ERAP2    | ERAP2    | -       |
| hsa-miR-493 | ERLIN2   | ERLIN2   | -       |
| hsa-miR-493 | ERMAP    | ERMAP    | -       |
| hsa-miR-493 | ESRP2    | ESRP2    | -       |
| hsa-miR-493 | ESRRG    | ESRRG    | -       |
| hsa-miR-493 | ETF1     | ETF1     | -       |
| hsa-miR-493 | ETV3     | ETV3     | -       |
| hsa-miR-493 | -        | EVI2B    | EVI2B   |
| hsa-miR-493 | FAF2     | FAF2     | -       |

|             |          |          |         |
|-------------|----------|----------|---------|
| hsa-miR-493 | FAM102B  | FAM102B  | -       |
| hsa-miR-493 | FAM109A  | -        | FAM109A |
| hsa-miR-493 | FAM154A  | FAM154A  | -       |
| hsa-miR-493 | FAM168A  | FAM168A  | -       |
| hsa-miR-493 | FAM180B  | FAM180B  | -       |
| hsa-miR-493 | FAM189A1 | FAM189A1 | -       |
| hsa-miR-493 | FAM53B   | FAM53B   | -       |
| hsa-miR-493 | FAM72A   | FAM72A   | -       |
| hsa-miR-493 | FAM72B   | FAM72B   | -       |
| hsa-miR-493 | FAM72D   | FAM72D   | -       |
| hsa-miR-493 | FAM82A2  | FAM82A2  | -       |
| hsa-miR-493 | FARP2    | -        | FARP2   |
| hsa-miR-493 | FAT1     | FAT1     | -       |
| hsa-miR-493 | FBXL4    | FBXL4    | -       |
| hsa-miR-493 | -        | FCGRT    | FCGRT   |
| hsa-miR-493 | -        | FCRLB    | FCRLB   |
| hsa-miR-493 | FEM1A    | FEM1A    | -       |
| hsa-miR-493 | FERMT1   | FERMT1   | -       |
| hsa-miR-493 | FEZ1     | FEZ1     | -       |
| hsa-miR-493 | FFAR2    | FFAR2    | -       |
| hsa-miR-493 | -        | FHIT     | FHIT    |
| hsa-miR-493 | FKBP1B   | FKBP1B   | -       |
| hsa-miR-493 | -        | FKBP4    | FKBP4   |
| hsa-miR-493 | FKBP5    | FKBP5    | -       |
| hsa-miR-493 | FLOT2    | FLOT2    | -       |
| hsa-miR-493 | FMR1     | FMR1     | -       |
| hsa-miR-493 | FNDCC5   | FNDCC5   | -       |
| hsa-miR-493 | FRAS1    | FRAS1    | -       |
| hsa-miR-493 | FRMPD4   | FRMPD4   | -       |
| hsa-miR-493 | FTO      | FTO      | -       |
| hsa-miR-493 | FYB      | FYB      | -       |
| hsa-miR-493 | FYCO1    | FYCO1    | -       |
| hsa-miR-493 | FZD4     | FZD4     | -       |
| hsa-miR-493 | FZD7     | FZD7     | -       |
| hsa-miR-493 | GAB2     | GAB2     | -       |
| hsa-miR-493 | GABBR2   | GABBR2   | -       |
| hsa-miR-493 | -        | GABRA2   | GABRA2  |
| hsa-miR-493 | GABRB3   | GABRB3   | -       |
| hsa-miR-493 | GAD1     | GAD1     | -       |
| hsa-miR-493 | GALNT6   | -        | GALNT6  |
| hsa-miR-493 | GATAD2B  | GATAD2B  | -       |
| hsa-miR-493 | GBP4     | GBP4     | -       |
| hsa-miR-493 | -        | GDPD2    | GDPD2   |
| hsa-miR-493 | GIGYF2   | GIGYF2   | -       |
| hsa-miR-493 | GIMAP6   | GIMAP6   | -       |
| hsa-miR-493 | GIPC1    | GIPC1    | -       |
| hsa-miR-493 | GJC1     | GJC1     | -       |
| hsa-miR-493 | -        | GLOD5    | GLOD5   |
| hsa-miR-493 | GLRA2    | GLRA2    | -       |
| hsa-miR-493 | GLT6D1   | GLT6D1   | -       |
| hsa-miR-493 | GMPT2    | GMPT2    | -       |

|             |          |          |        |
|-------------|----------|----------|--------|
| hsa-miR-493 | GNA11    | -        | GNA11  |
| hsa-miR-493 | GNB5     | GNB5     | -      |
| hsa-miR-493 | GNE      | GNE      | -      |
| hsa-miR-493 | GNG2     | GNG2     | -      |
| hsa-miR-493 | GNG4     | GNG4     | -      |
| hsa-miR-493 | GOLGA6L9 | GOLGA6L9 | -      |
| hsa-miR-493 | GOLGA7B  | GOLGA7B  | -      |
| hsa-miR-493 | GOSR2    | -        | GOSR2  |
| hsa-miR-493 | GPR137C  | GPR137C  | -      |
| hsa-miR-493 | GPR56    | -        | GPR56  |
| hsa-miR-493 | GPR68    | GPR68    | -      |
| hsa-miR-493 | GPR83    | GPR83    | -      |
| hsa-miR-493 | GPSM2    | GPSM2    | -      |
| hsa-miR-493 | GPSM3    | GPSM3    | -      |
| hsa-miR-493 | GREB1    | GREB1    | -      |
| hsa-miR-493 | GRIA1    | GRIA1    | -      |
| hsa-miR-493 | GRM3     | GRM3     | -      |
| hsa-miR-493 | GRM6     | GRM6     | -      |
| hsa-miR-493 | GRM7     | GRM7     | -      |
| hsa-miR-493 | GSR      | -        | GSR    |
| hsa-miR-493 | GSTM1    | GSTM1    | -      |
| hsa-miR-493 | GSTM4    | GSTM4    | -      |
| hsa-miR-493 | -        | GTF2A1   | GTF2A1 |
| hsa-miR-493 | -        | GTF2A2   | GTF2A2 |
| hsa-miR-493 | -        | GTF2F1   | GTF2F1 |
| hsa-miR-493 | GUCA1B   | GUCA1B   | -      |
| hsa-miR-493 | GULP1    | GULP1    | -      |
| hsa-miR-493 | GYP A    | GYP A    | -      |
| hsa-miR-493 | GYPE     | GYPE     | -      |
| hsa-miR-493 | H2AFY    | H2AFY    | -      |
| hsa-miR-493 | HAS3     | HAS3     | -      |
| hsa-miR-493 | HBEGF    | HBEGF    | -      |
| hsa-miR-493 | HBQ1     | -        | HBQ1   |
| hsa-miR-493 | HCP5     | HCP5     | -      |
| hsa-miR-493 | -        | HDC      | HDC    |
| hsa-miR-493 | HECW1    | HECW1    | -      |
| hsa-miR-493 | HHEX     | HHEX     | -      |
| hsa-miR-493 | HIP1     | HIP1     | -      |
| hsa-miR-493 | HMGCR    | HMGCR    | -      |
| hsa-miR-493 | HMG N5   | HMG N5   | -      |
| hsa-miR-493 | HMGXB4   | HMGXB4   | -      |
| hsa-miR-493 | HNMT     | HNMT     | -      |
| hsa-miR-493 | HNRNPL   | HNRNPL   | -      |
| hsa-miR-493 | HOXA11   | HOXA11   | -      |
| hsa-miR-493 | HOXD8    | HOXD8    | -      |
| hsa-miR-493 | HSD17B11 | HSD17B11 | -      |
| hsa-miR-493 | HSDL1    | HSDL1    | -      |
| hsa-miR-493 | HSF5     | HSF5     | -      |
| hsa-miR-493 | HSH2D    | HSH2D    | -      |
| hsa-miR-493 | HSPA4L   | HSPA4L   | -      |
| hsa-miR-493 | HSPA5    | HSPA5    | -      |

|             |          |          |        |
|-------------|----------|----------|--------|
| hsa-miR-493 | HUS1B    | HUS1B    | -      |
| hsa-miR-493 | ICK      | ICK      | -      |
| hsa-miR-493 | IFNK     | IFNK     | -      |
| hsa-miR-493 | IGF1     | IGF1     | -      |
| hsa-miR-493 | IGF1R    | -        | IGF1R  |
| hsa-miR-493 | IGFBP6   | -        | IGFBP6 |
| hsa-miR-493 | IGLON5   | IGLON5   | -      |
| hsa-miR-493 | IGSF3    | IGSF3    | -      |
| hsa-miR-493 | IKZF1    | IKZF1    | -      |
| hsa-miR-493 | IKZF4    | IKZF4    | -      |
| hsa-miR-493 | IL16     | -        | IL16   |
| hsa-miR-493 | IL17REL  | IL17REL  | -      |
| hsa-miR-493 | -        | IL2      | IL2    |
| hsa-miR-493 | IL20RA   | IL20RA   | -      |
| hsa-miR-493 | IL22RA2  | IL22RA2  | -      |
| hsa-miR-493 | ILDR2    | ILDR2    | -      |
| hsa-miR-493 | INA      | INA      | -      |
| hsa-miR-493 | INO80    | INO80    | -      |
| hsa-miR-493 | INTS4    | INTS4    | -      |
| hsa-miR-493 | IP6K3    | IP6K3    | -      |
| hsa-miR-493 | IQGAP1   | IQGAP1   | -      |
| hsa-miR-493 | IQGAP3   | IQGAP3   | -      |
| hsa-miR-493 | IRF6     | IRF6     | -      |
| hsa-miR-493 | ISM1     | ISM1     | -      |
| hsa-miR-493 | JAK2     | JAK2     | -      |
| hsa-miR-493 | JAKMIP2  | JAKMIP2  | -      |
| hsa-miR-493 | JAKMIP3  | JAKMIP3  | -      |
| hsa-miR-493 | JAZF1    | JAZF1    | -      |
| hsa-miR-493 | KAT2A    | KAT2A    | -      |
| hsa-miR-493 | KCNA3    | KCNA3    | -      |
| hsa-miR-493 | KCNA6    | KCNA6    | -      |
| hsa-miR-493 | KCNC1    | KCNC1    | -      |
| hsa-miR-493 | KCND1    | KCND1    | -      |
| hsa-miR-493 | KCNJ4    | -        | KCNJ4  |
| hsa-miR-493 | KCNJ9    | KCNJ9    | -      |
| hsa-miR-493 | -        | KCNK16   | KCNK16 |
| hsa-miR-493 | -        | KCNK7    | KCNK7  |
| hsa-miR-493 | KCNQ5    | KCNQ5    | -      |
| hsa-miR-493 | KCNV2    | -        | KCNV2  |
| hsa-miR-493 | KCTD15   | KCTD15   | -      |
| hsa-miR-493 | KCTD2    | KCTD2    | -      |
| hsa-miR-493 | KCTD21   | KCTD21   | -      |
| hsa-miR-493 | KDM2A    | KDM2A    | -      |
| hsa-miR-493 | KDM2B    | KDM2B    | -      |
| hsa-miR-493 | KDM5D    | KDM5D    | -      |
| hsa-miR-493 | KDM6B    | KDM6B    | -      |
| hsa-miR-493 | KIAA0240 | KIAA0240 | -      |
| hsa-miR-493 | KIAA0319 | KIAA0319 | -      |
| hsa-miR-493 | KIAA0907 | KIAA0907 | -      |
| hsa-miR-493 | KIAA1211 | KIAA1211 | -      |
| hsa-miR-493 | KIAA1486 | KIAA1486 | -      |

|             |           |           |       |
|-------------|-----------|-----------|-------|
| hsa-miR-493 | KIAA1755  | KIAA1755  | -     |
| hsa-miR-493 | KIF14     | KIF14     | -     |
| hsa-miR-493 | KIF3B     | KIF3B     | -     |
| hsa-miR-493 | KIT       | KIT       | -     |
| hsa-miR-493 | KLF6      | KLF6      | -     |
| hsa-miR-493 | KLF8      | KLF8      | -     |
| hsa-miR-493 | KLHL15    | KLHL15    | -     |
| hsa-miR-493 | KLHL18    | KLHL18    | -     |
| hsa-miR-493 | KRAS      | KRAS      | -     |
| hsa-miR-493 | KRT76     | KRT76     | -     |
| hsa-miR-493 | KRTAP4-1  | KRTAP4-1  | -     |
| hsa-miR-493 | KRTAP5-10 | KRTAP5-10 | -     |
| hsa-miR-493 | KRTAP5-11 | KRTAP5-11 | -     |
| hsa-miR-493 | KRTAP5-2  | KRTAP5-2  | -     |
| hsa-miR-493 | LAIR1     | LAIR1     | -     |
| hsa-miR-493 | LAMA3     | LAMA3     | -     |
| hsa-miR-493 | LATS2     | LATS2     | -     |
| hsa-miR-493 | LAX1      | LAX1      | -     |
| hsa-miR-493 | LCN10     | LCN10     | -     |
| hsa-miR-493 | -         | LECT2     | LECT2 |
| hsa-miR-493 | LEFTY2    | LEFTY2    | -     |
| hsa-miR-493 | -         | LGR6      | LGR6  |
| hsa-miR-493 | LIN28B    | LIN28B    | -     |
| hsa-miR-493 | LITAF     | LITAF     | -     |
| hsa-miR-493 | LMX1B     | -         | LMX1B |
| hsa-miR-493 | LNX2      | LNX2      | -     |
| hsa-miR-493 | LONRF1    | LONRF1    | -     |
| hsa-miR-493 | LPIN1     | LPIN1     | -     |
| hsa-miR-493 | LPXN      | LPXN      | -     |
| hsa-miR-493 | LRIT2     | LRIT2     | -     |
| hsa-miR-493 | LRP3      | LRP3      | -     |
| hsa-miR-493 | LRPPRC    | LRPPRC    | -     |
| hsa-miR-493 | LRRC10    | LRRC10    | -     |
| hsa-miR-493 | LRRC19    | LRRC19    | -     |
| hsa-miR-493 | LRRC40    | LRRC40    | -     |
| hsa-miR-493 | LRRC8C    | LRRC8C    | -     |
| hsa-miR-493 | LSM11     | LSM11     | -     |
| hsa-miR-493 | LTA       | LTA       | -     |
| hsa-miR-493 | -         | LTB       | LTB   |
| hsa-miR-493 | LTB4R     | LTB4R     | -     |
| hsa-miR-493 | LTBP3     | -         | LTBP3 |
| hsa-miR-493 | LY6E      | LY6E      | -     |
| hsa-miR-493 | MAD2L1    | MAD2L1    | -     |
| hsa-miR-493 | MAF       | MAF       | -     |
| hsa-miR-493 | MAK       | MAK       | -     |
| hsa-miR-493 | MAN1A2    | MAN1A2    | -     |
| hsa-miR-493 | MAN2A1    | MAN2A1    | -     |
| hsa-miR-493 | MAP1LC3B  | MAP1LC3B  | -     |
| hsa-miR-493 | MAP2      | MAP2      | -     |
| hsa-miR-493 | MAP3K9    | MAP3K9    | -     |
| hsa-miR-493 | MAP4      | MAP4      | -     |

|             |         |         |        |
|-------------|---------|---------|--------|
| hsa-miR-493 | MAP7    | -       | MAP7   |
| hsa-miR-493 | MAPK12  | -       | MAPK12 |
| hsa-miR-493 | MAPKAP1 | MAPKAP1 | -      |
| hsa-miR-493 | MARCH6  | MARCH6  | -      |
| hsa-miR-493 | MBD2    | MBD2    | -      |
| hsa-miR-493 | MC2R    | MC2R    | -      |
| hsa-miR-493 | MCF2L2  | MCF2L2  | -      |
| hsa-miR-493 | MCM9    | MCM9    | -      |
| hsa-miR-493 | ME2     | ME2     | -      |
| hsa-miR-493 | MEOX1   | MEOX1   | -      |
| hsa-miR-493 | MFHAS1  | MFHAS1  | -      |
| hsa-miR-493 | MFSD6   | MFSD6   | -      |
| hsa-miR-493 | MICAL3  | MICAL3  | -      |
| hsa-miR-493 | MINPP1  | MINPP1  | -      |
| hsa-miR-493 | MKI67   | -       | MKI67  |
| hsa-miR-493 | MLLT3   | MLLT3   | -      |
| hsa-miR-493 | MLLT6   | MLLT6   | -      |
| hsa-miR-493 | MME     | MME     | -      |
| hsa-miR-493 | MMP24   | MMP24   | -      |
| hsa-miR-493 | MOSC1   | MOSC1   | -      |
| hsa-miR-493 | MPP7    | MPP7    | -      |
| hsa-miR-493 | MREG    | MREG    | -      |
| hsa-miR-493 | MRPL35  | MRPL35  | -      |
| hsa-miR-493 | MRPS10  | MRPS10  | -      |
| hsa-miR-493 | -       | MRPS9   | MRPS9  |
| hsa-miR-493 | MRVI1   | MRVI1   | -      |
| hsa-miR-493 | MS4A1   | MS4A1   | -      |
| hsa-miR-493 | MS4A14  | MS4A14  | -      |
| hsa-miR-493 | MS4A7   | MS4A7   | -      |
| hsa-miR-493 | MS4A8B  | MS4A8B  | -      |
| hsa-miR-493 | MSI1    | MSI1    | -      |
| hsa-miR-493 | MSN     | MSN     | -      |
| hsa-miR-493 | MSR1    | MSR1    | -      |
| hsa-miR-493 | MSRB2   | MSRB2   | -      |
| hsa-miR-493 | MTHFD2L | MTHFD2L | -      |
| hsa-miR-493 | -       | MTMR10  | MTMR10 |
| hsa-miR-493 | MTMR12  | -       | MTMR12 |
| hsa-miR-493 | MTRF1L  | MTRF1L  | -      |
| hsa-miR-493 | MUC17   | MUC17   | -      |
| hsa-miR-493 | MUDENG  | MUDENG  | -      |
| hsa-miR-493 | MX2     | MX2     | -      |
| hsa-miR-493 | MXD1    | MXD1    | -      |
| hsa-miR-493 | MYCBPAP | MYCBPAP | -      |
| hsa-miR-493 | MYO18A  | MYO18A  | -      |
| hsa-miR-493 | MYO3B   | MYO3B   | -      |
| hsa-miR-493 | -       | MYPN    | MYPN   |
| hsa-miR-493 | N4BP1   | N4BP1   | -      |
| hsa-miR-493 | -       | NANS    | NANS   |
| hsa-miR-493 | NAV2    | NAV2    | -      |
| hsa-miR-493 | NCAM1   | NCAM1   | -      |
| hsa-miR-493 | NCOA1   | NCOA1   | -      |

|             |          |          |        |
|-------------|----------|----------|--------|
| hsa-miR-493 | NCOR2    | NCOR2    | -      |
| hsa-miR-493 | -        | NCR2     | NCR2   |
| hsa-miR-493 | NDST1    | NDST1    | -      |
| hsa-miR-493 | NDUFA5   | NDUFA5   | -      |
| hsa-miR-493 | -        | NDUFS4   | NDUFS4 |
| hsa-miR-493 | NEDD4    | NEDD4    | -      |
| hsa-miR-493 | NEO1     | NEO1     | -      |
| hsa-miR-493 | NIPAL4   | NIPAL4   | -      |
| hsa-miR-493 | NKX3-1   | NKX3-1   | -      |
| hsa-miR-493 | NPAT     | NPAT     | -      |
| hsa-miR-493 | NR5A1    | NR5A1    | -      |
| hsa-miR-493 | NT5M     | NT5M     | -      |
| hsa-miR-493 | -        | NTAN1    | NTAN1  |
| hsa-miR-493 | -        | NTF3     | NTF3   |
| hsa-miR-493 | NTM      | NTM      | -      |
| hsa-miR-493 | NUB1     | -        | NUB1   |
| hsa-miR-493 | -        | NUBPL    | NUBPL  |
| hsa-miR-493 | NUDCD1   | NUDCD1   | -      |
| hsa-miR-493 | NUP160   | NUP160   | -      |
| hsa-miR-493 | OAS2     | OAS2     | -      |
| hsa-miR-493 | OGDH     | OGDH     | -      |
| hsa-miR-493 | OGT      | OGT      | -      |
| hsa-miR-493 | OPA1     | OPA1     | -      |
| hsa-miR-493 | OPRM1    | OPRM1    | -      |
| hsa-miR-493 | ORAI3    | ORAI3    | -      |
| hsa-miR-493 | OSR1     | -        | OSR1   |
| hsa-miR-493 | OTUB2    | OTUB2    | -      |
| hsa-miR-493 | OTUD4    | OTUD4    | -      |
| hsa-miR-493 | -        | OXA1L    | OXA1L  |
| hsa-miR-493 | P2RX6    | P2RX6    | -      |
| hsa-miR-493 | PACRG    | PACRG    | -      |
| hsa-miR-493 | PADI2    | PADI2    | -      |
| hsa-miR-493 | PAK7     | PAK7     | -      |
| hsa-miR-493 | PARM1    | PARM1    | -      |
| hsa-miR-493 | PAX6     | PAX6     | -      |
| hsa-miR-493 | PCDHGA1  | PCDHGA1  | -      |
| hsa-miR-493 | PCDHGA10 | PCDHGA10 | -      |
| hsa-miR-493 | PCDHGA11 | PCDHGA11 | -      |
| hsa-miR-493 | PCDHGA12 | PCDHGA12 | -      |
| hsa-miR-493 | PCDHGA2  | PCDHGA2  | -      |
| hsa-miR-493 | PCDHGA3  | PCDHGA3  | -      |
| hsa-miR-493 | PCDHGA4  | PCDHGA4  | -      |
| hsa-miR-493 | PCDHGA5  | PCDHGA5  | -      |
| hsa-miR-493 | PCDHGA6  | PCDHGA6  | -      |
| hsa-miR-493 | PCDHGA7  | PCDHGA7  | -      |
| hsa-miR-493 | PCDHGA8  | PCDHGA8  | -      |
| hsa-miR-493 | PCDHGA9  | PCDHGA9  | -      |
| hsa-miR-493 | PCDHGB1  | PCDHGB1  | -      |
| hsa-miR-493 | PCDHGB2  | PCDHGB2  | -      |
| hsa-miR-493 | PCDHGB3  | PCDHGB3  | -      |
| hsa-miR-493 | PCDHGB4  | PCDHGB4  | -      |



|             |         |         |        |
|-------------|---------|---------|--------|
| hsa-miR-493 | PCDHGB5 | PCDHGB5 | -      |
| hsa-miR-493 | PCDHGB6 | PCDHGB6 | -      |
| hsa-miR-493 | PCDHGB7 | PCDHGB7 | -      |
| hsa-miR-493 | PCDHGC3 | PCDHGC3 | -      |
| hsa-miR-493 | PCDHGC4 | PCDHGC4 | -      |
| hsa-miR-493 | PCDHGC5 | PCDHGC5 | -      |
| hsa-miR-493 | PCMTD2  | PCMTD2  | -      |
| hsa-miR-493 | PCNT    | PCNT    | -      |
| hsa-miR-493 | -       | PCNXL2  | PCNXL2 |
| hsa-miR-493 | -       | PCOLCE  | PCOLCE |
| hsa-miR-493 | PCOLCE2 | PCOLCE2 | -      |
| hsa-miR-493 | PCSK2   | PCSK2   | -      |
| hsa-miR-493 | PDE4D   | PDE4D   | -      |
| hsa-miR-493 | PDE4DIP | PDE4DIP | -      |
| hsa-miR-493 | -       | PDE6C   | PDE6C  |
| hsa-miR-493 | PDK2    | PDK2    | -      |
| hsa-miR-493 | PDLIM5  | PDLIM5  | -      |
| hsa-miR-493 | PDX1    | PDX1    | -      |
| hsa-miR-493 | PDXDC1  | PDXDC1  | -      |
| hsa-miR-493 | PEG10   | PEG10   | -      |
| hsa-miR-493 | PER3    | PER3    | -      |
| hsa-miR-493 | PEX11B  | PEX11B  | -      |
| hsa-miR-493 | PFAS    | PFAS    | -      |
| hsa-miR-493 | PFKFB3  | PFKFB3  | -      |
| hsa-miR-493 | -       | PGS1    | PGS1   |
| hsa-miR-493 | PHACTR1 | PHACTR1 | -      |
| hsa-miR-493 | PHB     | PHB     | -      |
| hsa-miR-493 | PHF15   | PHF15   | -      |
| hsa-miR-493 | PHF16   | PHF16   | -      |
| hsa-miR-493 | PHF17   | PHF17   | -      |
| hsa-miR-493 | PHF19   | PHF19   | -      |
| hsa-miR-493 | PHLDB2  | PHLDB2  | -      |
| hsa-miR-493 | PHLPP2  | PHLPP2  | -      |
| hsa-miR-493 | PIAS3   | PIAS3   | -      |
| hsa-miR-493 | -       | PIGB    | PIGB   |
| hsa-miR-493 | PIGM    | PIGM    | -      |
| hsa-miR-493 | PIGS    | -       | PIGS   |
| hsa-miR-493 | PIGY    | PIGY    | -      |
| hsa-miR-493 | PIH1D2  | PIH1D2  | -      |
| hsa-miR-493 | PIK3CG  | PIK3CG  | -      |
| hsa-miR-493 | PITPNA  | PITPNA  | -      |
| hsa-miR-493 | PLA2G2D | PLA2G2D | -      |
| hsa-miR-493 | PLAGL2  | PLAGL2  | -      |
| hsa-miR-493 | PLEKHH1 | PLEKHH1 | -      |
| hsa-miR-493 | PLEKHJ1 | PLEKHJ1 | -      |
| hsa-miR-493 | PML     | PML     | -      |
| hsa-miR-493 | PMM2    | PMM2    | -      |
| hsa-miR-493 | PNMA2   | PNMA2   | -      |
| hsa-miR-493 | POLD3   | POLD3   | -      |
| hsa-miR-493 | POLDIP2 | POLDIP2 | -      |
| hsa-miR-493 | POU2F1  | POU2F1  | -      |

|             |          |          |       |
|-------------|----------|----------|-------|
| hsa-miR-493 | PPAPDC1B | PPAPDC1B | -     |
| hsa-miR-493 | PPCDC    | PPCDC    | -     |
| hsa-miR-493 | PPDPF    | PPDPF    | -     |
| hsa-miR-493 | PPIP5K2  | PPIP5K2  | -     |
| hsa-miR-493 | PPP1CC   | PPP1CC   | -     |
| hsa-miR-493 | PPP1R10  | PPP1R10  | -     |
| hsa-miR-493 | PPP1R3G  | PPP1R3G  | -     |
| hsa-miR-493 | PPP2R2C  | PPP2R2C  | -     |
| hsa-miR-493 | PRDM6    | PRDM6    | -     |
| hsa-miR-493 | PRELID2  | PRELID2  | -     |
| hsa-miR-493 | PRH2     | PRH2     | -     |
| hsa-miR-493 | PRKACB   | PRKACB   | -     |
| hsa-miR-493 | PRKCH    | PRKCH    | -     |
| hsa-miR-493 | PROK1    | PROK1    | -     |
| hsa-miR-493 | PRPS1    | PRPS1    | -     |
| hsa-miR-493 | PRR23C   | PRR23C   | -     |
| hsa-miR-493 | PRR5L    | PRR5L    | -     |
| hsa-miR-493 | PRRX2    | -        | PRRX2 |
| hsa-miR-493 | PRSS35   | PRSS35   | -     |
| hsa-miR-493 | PRUNE2   | PRUNE2   | -     |
| hsa-miR-493 | PSD4     | -        | PSD4  |
| hsa-miR-493 | PSG2     | PSG2     | -     |
| hsa-miR-493 | PSG5     | PSG5     | -     |
| hsa-miR-493 | PSG6     | PSG6     | -     |
| hsa-miR-493 | PSG9     | PSG9     | -     |
| hsa-miR-493 | PSKH1    | -        | PSKH1 |
| hsa-miR-493 | PSMA8    | PSMA8    | -     |
| hsa-miR-493 | PSMD10   | PSMD10   | -     |
| hsa-miR-493 | PSMD14   | PSMD14   | -     |
| hsa-miR-493 | PSMD7    | PSMD7    | -     |
| hsa-miR-493 | PTEN     | PTEN     | -     |
| hsa-miR-493 | PTGDR    | PTGDR    | -     |
| hsa-miR-493 | PTGFRN   | PTGFRN   | -     |
| hsa-miR-493 | PTHLH    | PTHLH    | -     |
| hsa-miR-493 | PTPRZ1   | PTPRZ1   | -     |
| hsa-miR-493 | QKI      | QKI      | -     |
| hsa-miR-493 | RAB1A    | RAB1A    | -     |
| hsa-miR-493 | RAB30    | RAB30    | -     |
| hsa-miR-493 | RAB40C   | RAB40C   | -     |
| hsa-miR-493 | RAC1     | RAC1     | -     |
| hsa-miR-493 | RAD9B    | RAD9B    | -     |
| hsa-miR-493 | RAF1     | RAF1     | -     |
| hsa-miR-493 | RAG2     | RAG2     | -     |
| hsa-miR-493 | RALB     | RALB     | -     |
| hsa-miR-493 | RALBP1   | RALBP1   | -     |
| hsa-miR-493 | RALGPS2  | RALGPS2  | -     |
| hsa-miR-493 | RAPGEF1  | RAPGEF1  | -     |
| hsa-miR-493 | RARA     | -        | RARA  |
| hsa-miR-493 | RASAL2   | RASAL2   | -     |
| hsa-miR-493 | RASGRP2  | RASGRP2  | -     |
| hsa-miR-493 | RBBP5    | RBBP5    | -     |

|             |          |          |          |
|-------------|----------|----------|----------|
| hsa-miR-493 | RBM43    | RBM43    | -        |
| hsa-miR-493 | RBM47    | RBM47    | -        |
| hsa-miR-493 | RBMX     | RBMX     | -        |
| hsa-miR-493 | RBP2     | -        | RBP2     |
| hsa-miR-493 | RBP4     | RBP4     | -        |
| hsa-miR-493 | RCOR3    | RCOR3    | -        |
| hsa-miR-493 | REG1B    | -        | REG1B    |
| hsa-miR-493 | REG3G    | REG3G    | -        |
| hsa-miR-493 | REM2     | REM2     | -        |
| hsa-miR-493 | RERE     | RERE     | -        |
| hsa-miR-493 | -        | RFC5     | RFC5     |
| hsa-miR-493 | RGAG1    | RGAG1    | -        |
| hsa-miR-493 | -        | RNASET2  | RNASET2  |
| hsa-miR-493 | RNF114   | RNF114   | -        |
| hsa-miR-493 | RNF139   | RNF139   | -        |
| hsa-miR-493 | RNF152   | RNF152   | -        |
| hsa-miR-493 | RNF169   | RNF169   | -        |
| hsa-miR-493 | RNF170   | RNF170   | -        |
| hsa-miR-493 | RNF215   | RNF215   | -        |
| hsa-miR-493 | RNF4     | RNF4     | -        |
| hsa-miR-493 | RNLS     | RNLS     | -        |
| hsa-miR-493 | ROBO2    | ROBO2    | -        |
| hsa-miR-493 | RPP25    | RPP25    | -        |
| hsa-miR-493 | RPS23    | RPS23    | -        |
| hsa-miR-493 | RSAD2    | RSAD2    | -        |
| hsa-miR-493 | RSPO2    | RSPO2    | -        |
| hsa-miR-493 | -        | RSU1     | RSU1     |
| hsa-miR-493 | RTN3     | RTN3     | -        |
| hsa-miR-493 | RTN4RL1  | RTN4RL1  | -        |
| hsa-miR-493 | RXFP3    | -        | RXFP3    |
| hsa-miR-493 | RYR2     | RYR2     | -        |
| hsa-miR-493 | S100A16  | S100A16  | -        |
| hsa-miR-493 | SAP130   | SAP130   | -        |
| hsa-miR-493 | SAP30L   | -        | SAP30L   |
| hsa-miR-493 | SART1    | SART1    | -        |
| hsa-miR-493 | SCYL2    | SCYL2    | -        |
| hsa-miR-493 | SDCBP    | SDCBP    | -        |
| hsa-miR-493 | SELP     | -        | SELP     |
| hsa-miR-493 | SEMA4F   | SEMA4F   | -        |
| hsa-miR-493 | SENP1    | SENP1    | -        |
| hsa-miR-493 | SERPINA1 | SERPINA1 | -        |
| hsa-miR-493 | SERPINB7 | SERPINB7 | -        |
| hsa-miR-493 | SERPINH1 | -        | SERPINH1 |
| hsa-miR-493 | SERTAD3  | SERTAD3  | -        |
| hsa-miR-493 | SET      | SET      | -        |
| hsa-miR-493 | SETD5    | SETD5    | -        |
| hsa-miR-493 | SF3A3    | SF3A3    | -        |
| hsa-miR-493 | SFRP2    | SFRP2    | -        |
| hsa-miR-493 | SGPL1    | SGPL1    | -        |
| hsa-miR-493 | SGSM1    | SGSM1    | -        |
| hsa-miR-493 | SGTA     | SGTA     | -        |

|             |          |          |         |
|-------------|----------|----------|---------|
| hsa-miR-493 | SH2D2A   | SH2D2A   | -       |
| hsa-miR-493 | SH3TC2   | SH3TC2   | -       |
| hsa-miR-493 | SH3YL1   | SH3YL1   | -       |
| hsa-miR-493 | SHC4     | SHC4     | -       |
| hsa-miR-493 | SIAH2    | SIAH2    | -       |
| hsa-miR-493 | SIM2     | SIM2     | -       |
| hsa-miR-493 | SIRPB1   | -        | SIRPB1  |
| hsa-miR-493 | SKA3     | SKA3     | -       |
| hsa-miR-493 | SLAMF6   | SLAMF6   | -       |
| hsa-miR-493 | SLC12A3  | SLC12A3  | -       |
| hsa-miR-493 | SLC12A8  | SLC12A8  | -       |
| hsa-miR-493 | SLC13A1  | SLC13A1  | -       |
| hsa-miR-493 | SLC17A6  | SLC17A6  | -       |
| hsa-miR-493 | SLC1A5   | SLC1A5   | -       |
| hsa-miR-493 | SLC25A10 | SLC25A10 | -       |
| hsa-miR-493 | SLC25A43 | SLC25A43 | -       |
| hsa-miR-493 | SLC25A44 | SLC25A44 | -       |
| hsa-miR-493 | SLC26A8  | SLC26A8  | -       |
| hsa-miR-493 | SLC35F1  | SLC35F1  | -       |
| hsa-miR-493 | SLC36A3  | SLC36A3  | -       |
| hsa-miR-493 | SLC39A13 | SLC39A13 | -       |
| hsa-miR-493 | SLC39A8  | SLC39A8  | -       |
| hsa-miR-493 | SLC43A1  | SLC43A1  | -       |
| hsa-miR-493 | SLC43A2  | -        | SLC43A2 |
| hsa-miR-493 | SLC4A1   | -        | SLC4A1  |
| hsa-miR-493 | SLC4A10  | SLC4A10  | -       |
| hsa-miR-493 | SLC4A8   | SLC4A8   | -       |
| hsa-miR-493 | -        | SLC7A13  | SLC7A13 |
| hsa-miR-493 | SLC7A5   | SLC7A5   | -       |
| hsa-miR-493 | SLTM     | SLTM     | -       |
| hsa-miR-493 | SMURF1   | SMURF1   | -       |
| hsa-miR-493 | SMYD1    | SMYD1    | -       |
| hsa-miR-493 | SNAP29   | SNAP29   | -       |
| hsa-miR-493 | SNAPIN   | SNAPIN   | -       |
| hsa-miR-493 | SNRK     | SNRK     | -       |
| hsa-miR-493 | SOSTDC1  | SOSTDC1  | -       |
| hsa-miR-493 | SOX21    | SOX21    | -       |
| hsa-miR-493 | SP100    | SP100    | -       |
| hsa-miR-493 | SPATA12  | SPATA12  | -       |
| hsa-miR-493 | SPCS3    | SPCS3    | -       |
| hsa-miR-493 | SPINK5   | SPINK5   | -       |
| hsa-miR-493 | SPRYD4   | SPRYD4   | -       |
| hsa-miR-493 | SPTY2D1  | SPTY2D1  | -       |
| hsa-miR-493 | SRC      | SRC      | -       |
| hsa-miR-493 | SRL      | SRL      | -       |
| hsa-miR-493 | SRP72    | SRP72    | -       |
| hsa-miR-493 | -        | SRPK2    | SRPK2   |
| hsa-miR-493 | ST13     | ST13     | -       |
| hsa-miR-493 | ST20     | ST20     | -       |
| hsa-miR-493 | STARD7   | STARD7   | -       |
| hsa-miR-493 | STEAP4   | STEAP4   | -       |

|             |             |             |       |
|-------------|-------------|-------------|-------|
| hsa-miR-493 | STK40       | STK40       | -     |
| hsa-miR-493 | STMN1       | STMN1       | -     |
| hsa-miR-493 | STX17       | STX17       | -     |
| hsa-miR-493 | SUGT1       | SUGT1       | -     |
| hsa-miR-493 | SULF1       | SULF1       | -     |
| hsa-miR-493 | SUMF1       | -           | SUMF1 |
| hsa-miR-493 | SUPT16H     | SUPT16H     | -     |
| hsa-miR-493 | SUSD4       | SUSD4       | -     |
| hsa-miR-493 | SYCE1L      | SYCE1L      | -     |
| hsa-miR-493 | SYN1        | SYN1        | -     |
| hsa-miR-493 | SYNGAP1     | SYNGAP1     | -     |
| hsa-miR-493 | SYPL2       | SYPL2       | -     |
| hsa-miR-493 | SYS1        | SYS1        | -     |
| hsa-miR-493 | SYT1        | SYT1        | -     |
| hsa-miR-493 | SYT7        | SYT7        | -     |
| hsa-miR-493 | TAGLN       | TAGLN       | -     |
| hsa-miR-493 | TAP2        | TAP2        | -     |
| hsa-miR-493 | TAS2R3      | TAS2R3      | -     |
| hsa-miR-493 | TAT         | TAT         | -     |
| hsa-miR-493 | TBC1D28     | TBC1D28     | -     |
| hsa-miR-493 | TBC1D2B     | TBC1D2B     | -     |
| hsa-miR-493 | TBC1D3      | TBC1D3      | -     |
| hsa-miR-493 | TBC1D3C     | TBC1D3C     | -     |
| hsa-miR-493 | TBC1D3F     | TBC1D3F     | -     |
| hsa-miR-493 | TBC1D3H     | TBC1D3H     | -     |
| hsa-miR-493 | TBR1        | TBR1        | -     |
| hsa-miR-493 | TCF21       | TCF21       | -     |
| hsa-miR-493 | TCOF1       | TCOF1       | -     |
| hsa-miR-493 | TEAD1       | TEAD1       | -     |
| hsa-miR-493 | TERF1       | TERF1       | -     |
| hsa-miR-493 | TET3        | TET3        | -     |
| hsa-miR-493 | TFIP11      | TFIP11      | -     |
| hsa-miR-493 | TG          | TG          | -     |
| hsa-miR-493 | THPO        | THPO        | -     |
| hsa-miR-493 | THRB        | THRB        | -     |
| hsa-miR-493 | THSD7A      | THSD7A      | -     |
| hsa-miR-493 | TIA1        | TIA1        | -     |
| hsa-miR-493 | TIGIT       | TIGIT       | -     |
| hsa-miR-493 | TJP2        | TJP2        | -     |
| hsa-miR-493 | TLK2        | TLK2        | -     |
| hsa-miR-493 | TLR10       | TLR10       | -     |
| hsa-miR-493 | TLR7        | TLR7        | -     |
| hsa-miR-493 | TMCC1       | TMCC1       | -     |
| hsa-miR-493 | TMEM127     | TMEM127     | -     |
| hsa-miR-493 | TMEM167A    | TMEM167A    | -     |
| hsa-miR-493 | TMEM194B    | TMEM194B    | -     |
| hsa-miR-493 | TMEM200A    | TMEM200A    | -     |
| hsa-miR-493 | TMEM201     | TMEM201     | -     |
| hsa-miR-493 | TMEM222     | TMEM222     | -     |
| hsa-miR-493 | TMEM30A     | TMEM30A     | -     |
| hsa-miR-493 | TMPRSS11BNL | TMPRSS11BNL | -     |

|             |          |          |         |
|-------------|----------|----------|---------|
| hsa-miR-493 | TNRC6A   | TNRC6A   | -       |
| hsa-miR-493 | TOMM5    | TOMM5    | -       |
| hsa-miR-493 | TOR1AIP2 | TOR1AIP2 | -       |
| hsa-miR-493 | TP73     | -        | TP73    |
| hsa-miR-493 | TPCN2    | -        | TPCN2   |
| hsa-miR-493 | TPM1     | TPM1     | -       |
| hsa-miR-493 | TPM3     | -        | TPM3    |
| hsa-miR-493 | TPP1     | TPP1     | -       |
| hsa-miR-493 | TPRG1    | TPRG1    | -       |
| hsa-miR-493 | TRAK1    | TRAK1    | -       |
| hsa-miR-493 | TRDMT1   | TRDMT1   | -       |
| hsa-miR-493 | TRERF1   | TRERF1   | -       |
| hsa-miR-493 | TRIM44   | TRIM44   | -       |
| hsa-miR-493 | TRIM45   | TRIM45   | -       |
| hsa-miR-493 | TRIM5    | TRIM5    | -       |
| hsa-miR-493 | TRIM65   | TRIM65   | -       |
| hsa-miR-493 | TRIM8    | TRIM8    | -       |
| hsa-miR-493 | TRIOBP   | TRIOBP   | -       |
| hsa-miR-493 | TRPA1    | TRPA1    | -       |
| hsa-miR-493 | -        | TSHZ1    | TSHZ1   |
| hsa-miR-493 | TSPAN14  | -        | TSPAN14 |
| hsa-miR-493 | TSPYL1   | TSPYL1   | -       |
| hsa-miR-493 | TSTD2    | TSTD2    | -       |
| hsa-miR-493 | TTC1     | TTC1     | -       |
| hsa-miR-493 | -        | TTC12    | TTC12   |
| hsa-miR-493 | TTC17    | TTC17    | -       |
| hsa-miR-493 | TTC7A    | -        | TTC7A   |
| hsa-miR-493 | -        | TTLL9    | TTLL9   |
| hsa-miR-493 | TWIST2   | TWIST2   | -       |
| hsa-miR-493 | TXLNA    | TXLNA    | -       |
| hsa-miR-493 | TXNDC5   | TXNDC5   | -       |
| hsa-miR-493 | TYSND1   | TYSND1   | -       |
| hsa-miR-493 | TYW3     | TYW3     | -       |
| hsa-miR-493 | UBAP2L   | UBAP2L   | -       |
| hsa-miR-493 | UBE3A    | UBE3A    | -       |
| hsa-miR-493 | UBIAD1   | UBIAD1   | -       |
| hsa-miR-493 | UBQLN2   | UBQLN2   | -       |
| hsa-miR-493 | UBXN8    | UBXN8    | -       |
| hsa-miR-493 | UGT3A1   | UGT3A1   | -       |
| hsa-miR-493 | USP19    | USP19    | -       |
| hsa-miR-493 | USP4     | USP4     | -       |
| hsa-miR-493 | -        | UTRN     | UTRN    |
| hsa-miR-493 | VAV3     | VAV3     | -       |
| hsa-miR-493 | VDAC1    | VDAC1    | -       |
| hsa-miR-493 | -        | VDAC2    | VDAC2   |
| hsa-miR-493 | VEGFA    | VEGFA    | -       |
| hsa-miR-493 | VGLL4    | VGLL4    | -       |
| hsa-miR-493 | VPS28    | VPS28    | -       |
| hsa-miR-493 | VPS35    | VPS35    | -       |
| hsa-miR-493 | VPS37B   | VPS37B   | -       |
| hsa-miR-493 | VPS37C   | VPS37C   | -       |

|             |         |         |       |
|-------------|---------|---------|-------|
| hsa-miR-493 | VPS4B   | VPS4B   | -     |
| hsa-miR-493 | VSIG10L | VSIG10L | -     |
| hsa-miR-493 | VWA5A   | VWA5A   | -     |
| hsa-miR-493 | WASF2   | WASF2   | -     |
| hsa-miR-493 | WDFY3   | WDFY3   | -     |
| hsa-miR-493 | WDR33   | WDR33   | -     |
| hsa-miR-493 | WDR48   | WDR48   | -     |
| hsa-miR-493 | WDR49   | WDR49   | -     |
| hsa-miR-493 | WDR72   | WDR72   | -     |
| hsa-miR-493 | WDR83   | WDR83   | -     |
| hsa-miR-493 | WDR87   | WDR87   | -     |
| hsa-miR-493 | WDR92   | WDR92   | -     |
| hsa-miR-493 | WDR93   | WDR93   | -     |
| hsa-miR-493 | WIPF2   | WIPF2   | -     |
| hsa-miR-493 | WNT8A   | WNT8A   | -     |
| hsa-miR-493 | XKR6    | XKR6    | -     |
| hsa-miR-493 | XKRX    | XKRX    | -     |
| hsa-miR-493 | XPNPEP3 | XPNPEP3 | -     |
| hsa-miR-493 | XPO4    | XPO4    | -     |
| hsa-miR-493 | XPR1    | XPR1    | -     |
| hsa-miR-493 | YAP1    | YAP1    | -     |
| hsa-miR-493 | -       | YIF1A   | YIF1A |
| hsa-miR-493 | YPEL2   | YPEL2   | -     |
| hsa-miR-493 | -       | YPEL3   | YPEL3 |
| hsa-miR-493 | YTHDF2  | YTHDF2  | -     |
| hsa-miR-493 | ZADH2   | ZADH2   | -     |
| hsa-miR-493 | ZBTB33  | ZBTB33  | -     |
| hsa-miR-493 | ZBTB4   | ZBTB4   | -     |
| hsa-miR-493 | ZBTB7C  | ZBTB7C  | -     |
| hsa-miR-493 | ZC3H12C | ZC3H12C | -     |
| hsa-miR-493 | ZCCHC14 | ZCCHC14 | -     |
| hsa-miR-493 | ZCCHC18 | ZCCHC18 | -     |
| hsa-miR-493 | ZCCHC2  | ZCCHC2  | -     |
| hsa-miR-493 | ZDHHC17 | ZDHHC17 | -     |
| hsa-miR-493 | ZDHHC18 | ZDHHC18 | -     |
| hsa-miR-493 | ZDHHC5  | ZDHHC5  | -     |
| hsa-miR-493 | ZFAND5  | ZFAND5  | -     |
| hsa-miR-493 | ZFP42   | ZFP42   | -     |
| hsa-miR-493 | ZMIZ2   | -       | ZMIZ2 |
| hsa-miR-493 | ZMYM4   | ZMYM4   | -     |
| hsa-miR-493 | ZNF135  | ZNF135  | -     |
| hsa-miR-493 | ZNF138  | ZNF138  | -     |
| hsa-miR-493 | ZNF277  | ZNF277  | -     |
| hsa-miR-493 | ZNF28   | ZNF28   | -     |
| hsa-miR-493 | ZNF286A | ZNF286A | -     |
| hsa-miR-493 | ZNF286B | ZNF286B | -     |
| hsa-miR-493 | ZNF292  | ZNF292  | -     |
| hsa-miR-493 | ZNF3    | ZNF3    | -     |
| hsa-miR-493 | ZNF302  | ZNF302  | -     |
| hsa-miR-493 | ZNF304  | ZNF304  | -     |
| hsa-miR-493 | ZNF362  | ZNF362  | -     |

|             |          |          |          |
|-------------|----------|----------|----------|
| hsa-miR-493 | ZNF468   | ZNF468   | -        |
| hsa-miR-493 | ZNF470   | ZNF470   | -        |
| hsa-miR-493 | ZNF473   | ZNF473   | -        |
| hsa-miR-493 | ZNF507   | ZNF507   | -        |
| hsa-miR-493 | ZNF529   | ZNF529   | -        |
| hsa-miR-493 | ZNF558   | ZNF558   | -        |
| hsa-miR-493 | ZNF586   | ZNF586   | -        |
| hsa-miR-493 | ZNF589   | ZNF589   | -        |
| hsa-miR-493 | ZNF594   | ZNF594   | -        |
| hsa-miR-493 | ZNF607   | ZNF607   | -        |
| hsa-miR-493 | ZNF620   | -        | ZNF620   |
| hsa-miR-493 | ZNF689   | ZNF689   | -        |
| hsa-miR-493 | ZNF720   | ZNF720   | -        |
| hsa-miR-493 | ZNF747   | ZNF747   | -        |
| hsa-miR-493 | ZNF765   | ZNF765   | -        |
| hsa-miR-493 | ZNF780A  | ZNF780A  | -        |
| hsa-miR-493 | ZNF784   | ZNF784   | -        |
| hsa-miR-493 | ZNF79    | ZNF79    | -        |
| hsa-miR-493 | ZNF813   | ZNF813   | -        |
| hsa-miR-493 | ZNF814   | ZNF814   | -        |
| hsa-miR-493 | ZNF827   | ZNF827   | -        |
| hsa-miR-493 | ZSCAN2   | ZSCAN2   | -        |
| hsa-miR-494 | -        | ABCC5    | ABCC5    |
| hsa-miR-494 | ACBD4    | ACBD4    | -        |
| hsa-miR-494 | -        | ACN9     | ACN9     |
| hsa-miR-494 | -        | ACTL6B   | ACTL6B   |
| hsa-miR-494 | ACVR1C   | ACVR1C   | -        |
| hsa-miR-494 | -        | ACYP2    | ACYP2    |
| hsa-miR-494 | ADAM10   | ADAM10   | -        |
| hsa-miR-494 | -        | ADAM21   | ADAM21   |
| hsa-miR-494 | -        | ADAM7    | ADAM7    |
| hsa-miR-494 | -        | ADAMTSL1 | ADAMTSL1 |
| hsa-miR-494 | ADAMTSL3 | ADAMTSL3 | -        |
| hsa-miR-494 | -        | ADCK1    | ADCK1    |
| hsa-miR-494 | ADCY6    | ADCY6    | -        |
| hsa-miR-494 | ADRBK2   | ADRBK2   | -        |
| hsa-miR-494 | AEBP2    | AEBP2    | -        |
| hsa-miR-494 | AGFG1    | AGFG1    | -        |
| hsa-miR-494 | AGPS     | AGPS     | -        |
| hsa-miR-494 | -        | AHI1     | AHI1     |
| hsa-miR-494 | AK5      | AK5      | -        |
| hsa-miR-494 | -        | ALG14    | ALG14    |
| hsa-miR-494 | -        | ALOX5AP  | ALOX5AP  |
| hsa-miR-494 | -        | ALS2CR4  | ALS2CR4  |
| hsa-miR-494 | -        | ANAPC10  | ANAPC10  |
| hsa-miR-494 | ANAPC7   | ANAPC7   | -        |
| hsa-miR-494 | -        | ANKRA2   | ANKRA2   |
| hsa-miR-494 | ANKRD17  | ANKRD17  | -        |
| hsa-miR-494 | ANKRD34C | ANKRD34C | -        |
| hsa-miR-494 | ANKRD40  | ANKRD40  | -        |
| hsa-miR-494 | ANKRD50  | ANKRD50  | -        |



|             |           |           |          |
|-------------|-----------|-----------|----------|
| hsa-miR-494 | ANKS1B    | ANKS1B    | -        |
| hsa-miR-494 | APC       | APC       | -        |
| hsa-miR-494 | -         | APIP      | APIP     |
| hsa-miR-494 | -         | APLP1     | APLP1    |
| hsa-miR-494 | -         | AQP3      | AQP3     |
| hsa-miR-494 | ARCN1     | ARCN1     | -        |
| hsa-miR-494 | -         | ARFGAP3   | ARFGAP3  |
| hsa-miR-494 | ARHGAP36  | ARHGAP36  | -        |
| hsa-miR-494 | ARHGAP5   | ARHGAP5   | -        |
| hsa-miR-494 | -         | ARHGAP8   | ARHGAP8  |
| hsa-miR-494 | ARHGEF12  | ARHGEF12  | -        |
| hsa-miR-494 | ARHGEF17  | ARHGEF17  | -        |
| hsa-miR-494 | -         | ARPC1B    | ARPC1B   |
| hsa-miR-494 | ATF3      | ATF3      | -        |
| hsa-miR-494 | ATP10A    | ATP10A    | -        |
| hsa-miR-494 | ATP5G2    | ATP5G2    | -        |
| hsa-miR-494 | -         | ATP5L     | ATP5L    |
| hsa-miR-494 | ATP7A     | ATP7A     | -        |
| hsa-miR-494 | ATP8A2    | ATP8A2    | -        |
| hsa-miR-494 | ATRX      | ATRX      | -        |
| hsa-miR-494 | ATXN3     | ATXN3     | -        |
| hsa-miR-494 | B3GALT2   | B3GALT2   | -        |
| hsa-miR-494 | BACH1     | BACH1     | -        |
| hsa-miR-494 | BBC3      | BBC3      | -        |
| hsa-miR-494 | -         | BBOX1     | BBOX1    |
| hsa-miR-494 | BCAN      | BCAN      | -        |
| hsa-miR-494 | BCAP29    | BCAP29    | -        |
| hsa-miR-494 | BCAS1     | BCAS1     | -        |
| hsa-miR-494 | -         | BCHE      | BCHE     |
| hsa-miR-494 | -         | BCMO1     | BCMO1    |
| hsa-miR-494 | BDNF      | BDNF      | -        |
| hsa-miR-494 | BEND2     | BEND2     | -        |
| hsa-miR-494 | BHLHE40   | BHLHE40   | -        |
| hsa-miR-494 | BMI1      | BMI1      | -        |
| hsa-miR-494 | -         | BMP4      | BMP4     |
| hsa-miR-494 | BMPR2     | BMPR2     | -        |
| hsa-miR-494 | -         | BOC       | BOC      |
| hsa-miR-494 | -         | BOLL      | BOLL     |
| hsa-miR-494 | -         | BPTF      | BPTF     |
| hsa-miR-494 | BRD3      | BRD3      | -        |
| hsa-miR-494 | -         | BZRAP1    | BZRAP1   |
| hsa-miR-494 | -         | C10orf79  | C10orf79 |
| hsa-miR-494 | C12orf23  | C12orf23  | -        |
| hsa-miR-494 | -         | C13orf18  | C13orf18 |
| hsa-miR-494 | C14orf147 | C14orf147 | -        |
| hsa-miR-494 | -         | C14orf4   | C14orf4  |
| hsa-miR-494 | C14orf43  | C14orf43  | -        |
| hsa-miR-494 | C16orf57  | C16orf57  | -        |
| hsa-miR-494 | C16orf72  | C16orf72  | -        |
| hsa-miR-494 | -         | C16orf73  | C16orf73 |
| hsa-miR-494 | -         | C16orf80  | C16orf80 |

|             |          |           |           |
|-------------|----------|-----------|-----------|
| hsa-miR-494 | -        | C19orf36  | C19orf36  |
| hsa-miR-494 | -        | C19orf56  | C19orf56  |
| hsa-miR-494 | -        | C1GALT1C1 | C1GALT1C1 |
| hsa-miR-494 | C1QTNF7  | C1QTNF7   | -         |
| hsa-miR-494 | C1orf144 | C1orf144  | -         |
| hsa-miR-494 | -        | C1orf26   | C1orf26   |
| hsa-miR-494 | -        | C1orf43   | C1orf43   |
| hsa-miR-494 | -        | C1orf87   | C1orf87   |
| hsa-miR-494 | -        | C20orf24  | C20orf24  |
| hsa-miR-494 | -        | C21orf63  | C21orf63  |
| hsa-miR-494 | -        | C3orf39   | C3orf39   |
| hsa-miR-494 | C3orf62  | C3orf62   | -         |
| hsa-miR-494 | C4orf33  | C4orf33   | -         |
| hsa-miR-494 | C5orf24  | C5orf24   | -         |
| hsa-miR-494 | -        | C6orf118  | C6orf118  |
| hsa-miR-494 | -        | C6orf146  | C6orf146  |
| hsa-miR-494 | -        | C6orf15   | C6orf15   |
| hsa-miR-494 | -        | C6orf182  | C6orf182  |
| hsa-miR-494 | -        | C7orf11   | C7orf11   |
| hsa-miR-494 | -        | C7orf46   | C7orf46   |
| hsa-miR-494 | C7orf58  | C7orf58   | -         |
| hsa-miR-494 | -        | C8orf45   | C8orf45   |
| hsa-miR-494 | -        | C8orf76   | C8orf76   |
| hsa-miR-494 | C9orf102 | C9orf102  | -         |
| hsa-miR-494 | CACNA1C  | CACNA1C   | -         |
| hsa-miR-494 | CACNB2   | -         | CACNB2    |
| hsa-miR-494 | -        | CANX      | CANX      |
| hsa-miR-494 | -        | CAPS2     | CAPS2     |
| hsa-miR-494 | -        | CARD14    | CARD14    |
| hsa-miR-494 | -        | CASK      | CASK      |
| hsa-miR-494 | CAST     | CAST      | -         |
| hsa-miR-494 | CBLL1    | CBLL1     | -         |
| hsa-miR-494 | -        | CBWD1     | CBWD1     |
| hsa-miR-494 | -        | CCDC115   | CCDC115   |
| hsa-miR-494 | -        | CCDC59    | CCDC59    |
| hsa-miR-494 | -        | CCL2      | CCL2      |
| hsa-miR-494 | CCND2    | CCND2     | -         |
| hsa-miR-494 | CCNY     | CCNY      | -         |
| hsa-miR-494 | -        | CD48      | CD48      |
| hsa-miR-494 | -        | CDCA2     | CDCA2     |
| hsa-miR-494 | -        | CDCA3     | CDCA3     |
| hsa-miR-494 | -        | CDK5RAP2  | CDK5RAP2  |
| hsa-miR-494 | CDKL2    | CDKL2     | -         |
| hsa-miR-494 | CELF1    | CELF1     | -         |
| hsa-miR-494 | CELF2    | CELF2     | -         |
| hsa-miR-494 | -        | CENPC1    | CENPC1    |
| hsa-miR-494 | -        | CENPI     | CENPI     |
| hsa-miR-494 | CFTR     | CFTR      | -         |
| hsa-miR-494 | CGGBP1   | CGGBP1    | -         |
| hsa-miR-494 | -        | CH25H     | CH25H     |
| hsa-miR-494 | -        | CHCHD8    | CHCHD8    |

|             |          |          |         |
|-------------|----------|----------|---------|
| hsa-miR-494 | CHD1     | CHD1     | -       |
| hsa-miR-494 | CHMP1B   | CHMP1B   | -       |
| hsa-miR-494 | CLASP1   | CLASP1   | -       |
| hsa-miR-494 | -        | CLEC4C   | CLEC4C  |
| hsa-miR-494 | -        | CLEC4D   | CLEC4D  |
| hsa-miR-494 | CLOCK    | CLOCK    | -       |
| hsa-miR-494 | -        | CLTA     | CLTA    |
| hsa-miR-494 | -        | CMTM2    | CMTM2   |
| hsa-miR-494 | CNBP     | CNBP     | -       |
| hsa-miR-494 | -        | CNN3     | CNN3    |
| hsa-miR-494 | CNR1     | CNR1     | -       |
| hsa-miR-494 | -        | CNTN1    | CNTN1   |
| hsa-miR-494 | CNTN3    | CNTN3    | -       |
| hsa-miR-494 | COG3     | COG3     | -       |
| hsa-miR-494 | COL6A6   | COL6A6   | -       |
| hsa-miR-494 | -        | COPB1    | COPB1   |
| hsa-miR-494 | -        | COX7C    | COX7C   |
| hsa-miR-494 | -        | CPB1     | CPB1    |
| hsa-miR-494 | CPT1A    | CPT1A    | -       |
| hsa-miR-494 | -        | CREM     | CREM    |
| hsa-miR-494 | CRISPLD1 | CRISPLD1 | -       |
| hsa-miR-494 | CS       | CS       | -       |
| hsa-miR-494 | CSNK1G1  | CSNK1G1  | -       |
| hsa-miR-494 | CTNND2   | CTNND2   | -       |
| hsa-miR-494 | CUL1     | CUL1     | -       |
| hsa-miR-494 | CUL3     | CUL3     | -       |
| hsa-miR-494 | CUL4A    | CUL4A    | -       |
| hsa-miR-494 | -        | CYB5A    | CYB5A   |
| hsa-miR-494 | CYFIP2   | CYFIP2   | -       |
| hsa-miR-494 | -        | CYP2C9   | CYP2C9  |
| hsa-miR-494 | -        | DARS2    | DARS2   |
| hsa-miR-494 | -        | DAXX     | DAXX    |
| hsa-miR-494 | DBX2     | DBX2     | -       |
| hsa-miR-494 | DCBLD2   | DCBLD2   | -       |
| hsa-miR-494 | -        | DCP1A    | DCP1A   |
| hsa-miR-494 | -        | DCUN1D5  | DCUN1D5 |
| hsa-miR-494 | -        | DEGS1    | DEGS1   |
| hsa-miR-494 | DISC1    | DISC1    | -       |
| hsa-miR-494 | DLD      | DLD      | -       |
| hsa-miR-494 | -        | DLEU1    | DLEU1   |
| hsa-miR-494 | DLG2     | DLG2     | -       |
| hsa-miR-494 | DLGAP1   | DLGAP1   | -       |
| hsa-miR-494 | DMWD     | DMWD     | -       |
| hsa-miR-494 | DPYSL2   | DPYSL2   | -       |
| hsa-miR-494 | DPYSL3   | DPYSL3   | -       |
| hsa-miR-494 | DSCAML1  | DSCAML1  | -       |
| hsa-miR-494 | DSEL     | DSEL     | -       |
| hsa-miR-494 | -        | DSP      | DSP     |
| hsa-miR-494 | -        | DUT      | DUT     |
| hsa-miR-494 | DZIP3    | DZIP3    | -       |
| hsa-miR-494 | EBF3     | EBF3     | -       |

|             |         |         |        |
|-------------|---------|---------|--------|
| hsa-miR-494 | -       | EEF1E1  | EEF1E1 |
| hsa-miR-494 | EFNB2   | EFNB2   | -      |
| hsa-miR-494 | EGR3    | EGR3    | -      |
| hsa-miR-494 | -       | EIF1B   | EIF1B  |
| hsa-miR-494 | EIF2C1  | EIF2C1  | -      |
| hsa-miR-494 | EIF5    | EIF5    | -      |
| hsa-miR-494 | ELF1    | ELF1    | -      |
| hsa-miR-494 | ELF2    | ELF2    | -      |
| hsa-miR-494 | -       | ELOVL3  | ELOVL3 |
| hsa-miR-494 | ELOVL5  | ELOVL5  | -      |
| hsa-miR-494 | EML4    | EML4    | -      |
| hsa-miR-494 | EN2     | EN2     | -      |
| hsa-miR-494 | ENC1    | ENC1    | -      |
| hsa-miR-494 | ENPP1   | ENPP1   | -      |
| hsa-miR-494 | EPC2    | EPC2    | -      |
| hsa-miR-494 | ERLIN2  | ERLIN2  | -      |
| hsa-miR-494 | ERO1LB  | ERO1LB  | -      |
| hsa-miR-494 | ESRRG   | ESRRG   | -      |
| hsa-miR-494 | -       | EVI2B   | EVI2B  |
| hsa-miR-494 | EVI5    | EVI5    | -      |
| hsa-miR-494 | -       | EXOC6   | EXOC6  |
| hsa-miR-494 | -       | EXOSC7  | EXOSC7 |
| hsa-miR-494 | -       | FAIM    | FAIM   |
| hsa-miR-494 | FAM116A | FAM116A | -      |
| hsa-miR-494 | FAM120A | FAM120A | -      |
| hsa-miR-494 | FAM169A | FAM169A | -      |
| hsa-miR-494 | FAM196A | FAM196A | -      |
| hsa-miR-494 | -       | FAM38B  | FAM38B |
| hsa-miR-494 | FAM40B  | FAM40B  | -      |
| hsa-miR-494 | FAM70A  | FAM70A  | -      |
| hsa-miR-494 | -       | FANCM   | FANCM  |
| hsa-miR-494 | -       | FBLN5   | FBLN5  |
| hsa-miR-494 | FBN1    | FBN1    | -      |
| hsa-miR-494 | FBXO33  | FBXO33  | -      |
| hsa-miR-494 | FBXO34  | FBXO34  | -      |
| hsa-miR-494 | -       | FCN1    | FCN1   |
| hsa-miR-494 | -       | FCRL5   | FCRL5  |
| hsa-miR-494 | -       | FGF5    | FGF5   |
| hsa-miR-494 | FGF7    | FGF7    | -      |
| hsa-miR-494 | FGFR2   | FGFR2   | -      |
| hsa-miR-494 | FGL2    | FGL2    | -      |
| hsa-miR-494 | -       | FHL1    | FHL1   |
| hsa-miR-494 | FHOD3   | FHOD3   | -      |
| hsa-miR-494 | -       | FIP1L1  | FIP1L1 |
| hsa-miR-494 | -       | FLT3    | FLT3   |
| hsa-miR-494 | FNIP1   | FNIP1   | -      |
| hsa-miR-494 | FOXJ2   | FOXJ2   | -      |
| hsa-miR-494 | FOXJ3   | FOXJ3   | -      |
| hsa-miR-494 | -       | FRAS1   | FRAS1  |
| hsa-miR-494 | -       | FRYL    | FRYL   |
| hsa-miR-494 | -       | FSIP1   | FSIP1  |

|             |         |          |          |
|-------------|---------|----------|----------|
| hsa-miR-494 | FSTL5   | FSTL5    | -        |
| hsa-miR-494 | FUT8    | FUT8     | -        |
| hsa-miR-494 | -       | G6PC     | G6PC     |
| hsa-miR-494 | -       | G6PC2    | G6PC2    |
| hsa-miR-494 | -       | GABBR1   | GABBR1   |
| hsa-miR-494 | GALNT1  | GALNT1   | -        |
| hsa-miR-494 | -       | GALNT11  | GALNT11  |
| hsa-miR-494 | GALNT2  | GALNT2   | -        |
| hsa-miR-494 | GALNT7  | GALNT7   | -        |
| hsa-miR-494 | GCA     | GCA      | -        |
| hsa-miR-494 | -       | GCKR     | GCKR     |
| hsa-miR-494 | GDAP1   | GDAP1    | -        |
| hsa-miR-494 | GGNBP2  | GGNBP2   | -        |
| hsa-miR-494 | GK      | GK       | -        |
| hsa-miR-494 | -       | GLIPR1L2 | GLIPR1L2 |
| hsa-miR-494 | GLIS3   | GLIS3    | -        |
| hsa-miR-494 | -       | GLRX2    | GLRX2    |
| hsa-miR-494 | -       | GLT6D1   | GLT6D1   |
| hsa-miR-494 | GNAI3   | GNAI3    | -        |
| hsa-miR-494 | -       | GNAS     | GNAS     |
| hsa-miR-494 | -       | GNG10    | GNG10    |
| hsa-miR-494 | -       | GNG2     | GNG2     |
| hsa-miR-494 | -       | GNPAT    | GNPAT    |
| hsa-miR-494 | GOSR1   | GOSR1    | -        |
| hsa-miR-494 | GOSR2   | GOSR2    | -        |
| hsa-miR-494 | GPATCH8 | GPATCH8  | -        |
| hsa-miR-494 | -       | GPC3     | GPC3     |
| hsa-miR-494 | -       | GPLD1    | GPLD1    |
| hsa-miR-494 | GPR158  | GPR158   | -        |
| hsa-miR-494 | -       | GPR84    | GPR84    |
| hsa-miR-494 | -       | GPR87    | GPR87    |
| hsa-miR-494 | -       | GPRASP1  | GPRASP1  |
| hsa-miR-494 | -       | GPRC5C   | GPRC5C   |
| hsa-miR-494 | -       | GPRC6A   | GPRC6A   |
| hsa-miR-494 | GPT2    | GPT2     | -        |
| hsa-miR-494 | -       | GRHL1    | GRHL1    |
| hsa-miR-494 | GRIK2   | GRIK2    | -        |
| hsa-miR-494 | GRIK3   | GRIK3    | -        |
| hsa-miR-494 | GRINA   | -        | GRINA    |
| hsa-miR-494 | -       | GRIP1    | GRIP1    |
| hsa-miR-494 | -       | GRM1     | GRM1     |
| hsa-miR-494 | GTF2E1  | GTF2E1   | -        |
| hsa-miR-494 | -       | GTPBP6   | GTPBP6   |
| hsa-miR-494 | GUCA1B  | GUCA1B   | -        |
| hsa-miR-494 | GULP1   | GULP1    | -        |
| hsa-miR-494 | -       | H2AFB2   | H2AFB2   |
| hsa-miR-494 | -       | H2AFB3   | H2AFB3   |
| hsa-miR-494 | -       | H2AFV    | H2AFV    |
| hsa-miR-494 | H3F3B   | H3F3B    | -        |
| hsa-miR-494 | -       | HACE1    | HACE1    |
| hsa-miR-494 | -       | HEATR1   | HEATR1   |

|             |          |          |          |
|-------------|----------|----------|----------|
| hsa-miR-494 | -        | HEATR3   | HEATR3   |
| hsa-miR-494 | HEPHL1   | HEPHL1   | -        |
| hsa-miR-494 | HIVEP2   | HIVEP2   | -        |
| hsa-miR-494 | HLA-DQA1 | HLA-DQA1 | -        |
| hsa-miR-494 | HLF      | HLF      | -        |
| hsa-miR-494 | -        | HM13     | HM13     |
| hsa-miR-494 | -        | HMGA2    | HMGA2    |
| hsa-miR-494 | HMGB3    | HMGB3    | -        |
| hsa-miR-494 | HMGCS1   | HMGCS1   | -        |
| hsa-miR-494 | HMP19    | HMP19    | -        |
| hsa-miR-494 | HNRNPA3  | HNRNPA3  | -        |
| hsa-miR-494 | -        | HOXB2    | HOXB2    |
| hsa-miR-494 | -        | HOXB6    | HOXB6    |
| hsa-miR-494 | -        | HS3ST3A1 | HS3ST3A1 |
| hsa-miR-494 | -        | HSF2     | HSF2     |
| hsa-miR-494 | HSPA12A  | HSPA12A  | -        |
| hsa-miR-494 | -        | HSPA14   | HSPA14   |
| hsa-miR-494 | -        | IFITM2   | IFITM2   |
| hsa-miR-494 | IGDCC4   | IGDCC4   | -        |
| hsa-miR-494 | IGF1R    | IGF1R    | -        |
| hsa-miR-494 | IGF2BP1  | IGF2BP1  | -        |
| hsa-miR-494 | IKBKAP   | IKBKAP   | -        |
| hsa-miR-494 | IL12B    | IL12B    | -        |
| hsa-miR-494 | ILDR1    | ILDR1    | -        |
| hsa-miR-494 | IMPACT   | IMPACT   | -        |
| hsa-miR-494 | -        | ING2     | ING2     |
| hsa-miR-494 | INHBB    | INHBB    | -        |
| hsa-miR-494 | -        | IQCH     | IQCH     |
| hsa-miR-494 | IRAK3    | IRAK3    | -        |
| hsa-miR-494 | -        | ITM2B    | ITM2B    |
| hsa-miR-494 | -        | KCNJ12   | KCNJ12   |
| hsa-miR-494 | KCTD14   | KCTD14   | -        |
| hsa-miR-494 | -        | KCTD8    | KCTD8    |
| hsa-miR-494 | KDM5C    | KDM5C    | -        |
| hsa-miR-494 | -        | KIAA0020 | KIAA0020 |
| hsa-miR-494 | -        | KIAA0195 | KIAA0195 |
| hsa-miR-494 | -        | KIAA0406 | KIAA0406 |
| hsa-miR-494 | KIAA0776 | KIAA0776 | -        |
| hsa-miR-494 | -        | KIAA1009 | KIAA1009 |
| hsa-miR-494 | KIAA1045 | KIAA1045 | -        |
| hsa-miR-494 | -        | KIAA1107 | KIAA1107 |
| hsa-miR-494 | KIAA1147 | KIAA1147 | -        |
| hsa-miR-494 | KIAA1549 | KIAA1549 | -        |
| hsa-miR-494 | KIAA1598 | KIAA1598 | -        |
| hsa-miR-494 | -        | KIAA2026 | KIAA2026 |
| hsa-miR-494 | -        | KIF18A   | KIF18A   |
| hsa-miR-494 | KLF11    | KLF11    | -        |
| hsa-miR-494 | KLF9     | KLF9     | -        |
| hsa-miR-494 | -        | KLK13    | KLK13    |
| hsa-miR-494 | KLRAQ1   | KLRAQ1   | -        |
| hsa-miR-494 | -        | KLRC4    | KLRC4    |

|             |         |         |        |
|-------------|---------|---------|--------|
| hsa-miR-494 | -       | KLRD1   | KLRD1  |
| hsa-miR-494 | KPNA1   | KPNA1   | -      |
| hsa-miR-494 | -       | KRT27   | KRT27  |
| hsa-miR-494 | -       | KRT32   | KRT32  |
| hsa-miR-494 | -       | KRT72   | KRT72  |
| hsa-miR-494 | -       | KRT81   | KRT81  |
| hsa-miR-494 | KRT85   | -       | KRT85  |
| hsa-miR-494 | -       | LACE1   | LACE1  |
| hsa-miR-494 | -       | LACTB2  | LACTB2 |
| hsa-miR-494 | LANCL2  | LANCL2  | -      |
| hsa-miR-494 | LDLRAP1 | LDLRAP1 | -      |
| hsa-miR-494 | LEFTY2  | LEFTY2  | -      |
| hsa-miR-494 | LIF     | LIF     | -      |
| hsa-miR-494 | -       | LMBRD1  | LMBRD1 |
| hsa-miR-494 | LMX1A   | LMX1A   | -      |
| hsa-miR-494 | LPP     | LPP     | -      |
| hsa-miR-494 | -       | LRFN5   | LRFN5  |
| hsa-miR-494 | LRP1B   | LRP1B   | -      |
| hsa-miR-494 | -       | LRRC17  | LRRC17 |
| hsa-miR-494 | LRRC19  | LRRC19  | -      |
| hsa-miR-494 | LRRC3   | LRRC3   | -      |
| hsa-miR-494 | -       | LRRC33  | LRRC33 |
| hsa-miR-494 | -       | LRRIQ1  | LRRIQ1 |
| hsa-miR-494 | LUC7L3  | LUC7L3  | -      |
| hsa-miR-494 | LUZP2   | LUZP2   | -      |
| hsa-miR-494 | MAB21L1 | MAB21L1 | -      |
| hsa-miR-494 | MACC1   | MACC1   | -      |
| hsa-miR-494 | -       | MAGEB4  | MAGEB4 |
| hsa-miR-494 | -       | MAGEE1  | MAGEE1 |
| hsa-miR-494 | -       | MAP3K8  | MAP3K8 |
| hsa-miR-494 | MAP4    | MAP4    | -      |
| hsa-miR-494 | -       | MAP4K2  | MAP4K2 |
| hsa-miR-494 | MAT2A   | MAT2A   | -      |
| hsa-miR-494 | -       | MAX     | MAX    |
| hsa-miR-494 | MBD2    | MBD2    | -      |
| hsa-miR-494 | MBD5    | MBD5    | -      |
| hsa-miR-494 | -       | MBNL2   | MBNL2  |
| hsa-miR-494 | MCC     | MCC     | -      |
| hsa-miR-494 | MDGA2   | MDGA2   | -      |
| hsa-miR-494 | -       | MED28   | MED28  |
| hsa-miR-494 | MEGF9   | MEGF9   | -      |
| hsa-miR-494 | MEIS2   | MEIS2   | -      |
| hsa-miR-494 | MESDC1  | MESDC1  | -      |
| hsa-miR-494 | MFAP3L  | MFAP3L  | -      |
| hsa-miR-494 | -       | MFN1    | MFN1   |
| hsa-miR-494 | -       | MIA2    | MIA2   |
| hsa-miR-494 | MMD     | MMD     | -      |
| hsa-miR-494 | MMGT1   | MMGT1   | -      |
| hsa-miR-494 | -       | MMP10   | MMP10  |
| hsa-miR-494 | -       | MMP9    | MMP9   |
| hsa-miR-494 | -       | MNDA    | MNDA   |

|             |          |           |           |
|-------------|----------|-----------|-----------|
| hsa-miR-494 | MORF4L2  | MORF4L2   | -         |
| hsa-miR-494 | -        | MRPL32    | MRPL32    |
| hsa-miR-494 | -        | MRPL43    | MRPL43    |
| hsa-miR-494 | -        | MRPL45    | MRPL45    |
| hsa-miR-494 | -        | MRPS14    | MRPS14    |
| hsa-miR-494 | MSI1     | MSI1      | -         |
| hsa-miR-494 | -        | MTBP      | MTBP      |
| hsa-miR-494 | MTDH     | MTDH      | -         |
| hsa-miR-494 | MTF1     | MTF1      | -         |
| hsa-miR-494 | -        | MTMR1     | MTMR1     |
| hsa-miR-494 | -        | MTX2      | MTX2      |
| hsa-miR-494 | -        | MUT       | MUT       |
| hsa-miR-494 | MYOF     | MYOF      | -         |
| hsa-miR-494 | -        | MYST3     | MYST3     |
| hsa-miR-494 | MYT1L    | MYT1L     | -         |
| hsa-miR-494 | NAALADL2 | NAALADL2  | -         |
| hsa-miR-494 | NADK     | NADK      | -         |
| hsa-miR-494 | NANOS1   | NANOS1    | -         |
| hsa-miR-494 | NAV2     | NAV2      | -         |
| hsa-miR-494 | NBEA     | NBEA      | -         |
| hsa-miR-494 | NCDN     | NCDN      | -         |
| hsa-miR-494 | NDUFA4   | NDUFA4    | -         |
| hsa-miR-494 | NDUFC2   | NDUFC2    | -         |
| hsa-miR-494 | -        | NEB       | NEB       |
| hsa-miR-494 | NEDD4L   | NEDD4L    | -         |
| hsa-miR-494 | -        | NEK2      | NEK2      |
| hsa-miR-494 | NEK7     | NEK7      | -         |
| hsa-miR-494 | -        | NELL1     | NELL1     |
| hsa-miR-494 | -        | NEUROD6   | NEUROD6   |
| hsa-miR-494 | NFAT5    | NFAT5     | -         |
| hsa-miR-494 | -        | NFATC3    | NFATC3    |
| hsa-miR-494 | NFIB     | NFIB      | -         |
| hsa-miR-494 | NHLH2    | NHLH2     | -         |
| hsa-miR-494 | -        | NIPSNAP3A | NIPSNAP3A |
| hsa-miR-494 | -        | NIT2      | NIT2      |
| hsa-miR-494 | -        | NMI       | NMI       |
| hsa-miR-494 | NMNAT2   | NMNAT2    | -         |
| hsa-miR-494 | NOVA1    | NOVA1     | -         |
| hsa-miR-494 | -        | NOX3      | NOX3      |
| hsa-miR-494 | NPAS3    | NPAS3     | -         |
| hsa-miR-494 | NPR3     | NPR3      | -         |
| hsa-miR-494 | NRG3     | NRG3      | -         |
| hsa-miR-494 | -        | NRSN1     | NRSN1     |
| hsa-miR-494 | -        | NTS       | NTS       |
| hsa-miR-494 | -        | NUP62CL   | NUP62CL   |
| hsa-miR-494 | -        | NUSAP1    | NUSAP1    |
| hsa-miR-494 | NUTF2    | NUTF2     | -         |
| hsa-miR-494 | -        | ODF1      | ODF1      |
| hsa-miR-494 | ODZ2     | ODZ2      | -         |
| hsa-miR-494 | -        | OFD1      | OFD1      |
| hsa-miR-494 | -        | OMG       | OMG       |



|             |          |          |          |
|-------------|----------|----------|----------|
| hsa-miR-494 | -        | OR8G1    | OR8G1    |
| hsa-miR-494 | -        | OSR2     | OSR2     |
| hsa-miR-494 | OTUD3    | OTUD3    | -        |
| hsa-miR-494 | P4HA1    | P4HA1    | -        |
| hsa-miR-494 | -        | P4HA2    | P4HA2    |
| hsa-miR-494 | PARP16   | PARP16   | -        |
| hsa-miR-494 | PBRM1    | PBRM1    | -        |
| hsa-miR-494 | -        | PCNT     | PCNT     |
| hsa-miR-494 | -        | PCOLCE   | PCOLCE   |
| hsa-miR-494 | -        | PCP4     | PCP4     |
| hsa-miR-494 | PCSK1    | PCSK1    | -        |
| hsa-miR-494 | -        | PDCL3    | PDCL3    |
| hsa-miR-494 | PDGFRA   | PDGFRA   | -        |
| hsa-miR-494 | -        | PDIA3    | PDIA3    |
| hsa-miR-494 | -        | PDIA4    | PDIA4    |
| hsa-miR-494 | -        | PDIK1L   | PDIK1L   |
| hsa-miR-494 | -        | PDLIM3   | PDLIM3   |
| hsa-miR-494 | -        | PDLIM4   | PDLIM4   |
| hsa-miR-494 | PDS5B    | PDS5B    | -        |
| hsa-miR-494 | -        | PELI1    | PELI1    |
| hsa-miR-494 | PGPEP1L  | PGPEP1L  | -        |
| hsa-miR-494 | PHF8     | PHF8     | -        |
| hsa-miR-494 | PHOX2B   | PHOX2B   | -        |
| hsa-miR-494 | PITPNB   | PITPNB   | -        |
| hsa-miR-494 | PKNOX1   | PKNOX1   | -        |
| hsa-miR-494 | -        | PLAUR    | PLAUR    |
| hsa-miR-494 | PLCB1    | PLCB1    | -        |
| hsa-miR-494 | -        | PLCH1    | PLCH1    |
| hsa-miR-494 | -        | PLEKHG2  | PLEKHG2  |
| hsa-miR-494 | PLEKHH1  | PLEKHH1  | -        |
| hsa-miR-494 | -        | PNMA5    | PNMA5    |
| hsa-miR-494 | -        | PNPLA7   | PNPLA7   |
| hsa-miR-494 | -        | POLDIP3  | POLDIP3  |
| hsa-miR-494 | -        | PPAPDC1A | PPAPDC1A |
| hsa-miR-494 | PPARGC1A | PPARGC1A | -        |
| hsa-miR-494 | -        | PPBP     | PPBP     |
| hsa-miR-494 | PPFIA1   | PPFIA1   | -        |
| hsa-miR-494 | -        | PPIL4    | PPIL4    |
| hsa-miR-494 | PPM1B    | PPM1B    | -        |
| hsa-miR-494 | PPM1D    | PPM1D    | -        |
| hsa-miR-494 | PPP2R2B  | PPP2R2B  | -        |
| hsa-miR-494 | PPP2R5E  | PPP2R5E  | -        |
| hsa-miR-494 | -        | PPWD1    | PPWD1    |
| hsa-miR-494 | -        | PRDM6    | PRDM6    |
| hsa-miR-494 | PRKAB2   | PRKAB2   | -        |
| hsa-miR-494 | PRKCE    | PRKCE    | -        |
| hsa-miR-494 | PRMT6    | PRMT6    | -        |
| hsa-miR-494 | PRPF40A  | PRPF40A  | -        |
| hsa-miR-494 | -        | PRR14    | PRR14    |
| hsa-miR-494 | -        | PRSS27   | PRSS27   |
| hsa-miR-494 | PRTG     | -        | PRTG     |

|             |         |          |          |
|-------------|---------|----------|----------|
| hsa-miR-494 | -       | PSEN1    | PSEN1    |
| hsa-miR-494 | -       | PSG6     | PSG6     |
| hsa-miR-494 | -       | PSG9     | PSG9     |
| hsa-miR-494 | -       | PSMA1    | PSMA1    |
| hsa-miR-494 | PTEN    | PTEN     | -        |
| hsa-miR-494 | PTER    | PTER     | -        |
| hsa-miR-494 | -       | PTGER3   | PTGER3   |
| hsa-miR-494 | -       | PTPN12   | PTPN12   |
| hsa-miR-494 | -       | PTPN4    | PTPN4    |
| hsa-miR-494 | PTPRB   | PTPRB    | -        |
| hsa-miR-494 | PUS7L   | PUS7L    | -        |
| hsa-miR-494 | -       | RAB27A   | RAB27A   |
| hsa-miR-494 | RAB40B  | RAB40B   | -        |
| hsa-miR-494 | RAB5A   | RAB5A    | -        |
| hsa-miR-494 | -       | RABGAP1L | RABGAP1L |
| hsa-miR-494 | RAD23B  | RAD23B   | -        |
| hsa-miR-494 | -       | RAD51L3  | RAD51L3  |
| hsa-miR-494 | RAP1B   | RAP1B    | -        |
| hsa-miR-494 | RAPH1   | RAPH1    | -        |
| hsa-miR-494 | -       | RARRES1  | RARRES1  |
| hsa-miR-494 | RASGRF1 | RASGRF1  | -        |
| hsa-miR-494 | RBM39   | RBM39    | -        |
| hsa-miR-494 | RCAN2   | RCAN2    | -        |
| hsa-miR-494 | -       | REPS2    | REPS2    |
| hsa-miR-494 | -       | RGS7     | RGS7     |
| hsa-miR-494 | -       | RNASEH2B | RNASEH2B |
| hsa-miR-494 | -       | RNF103   | RNF103   |
| hsa-miR-494 | RNF165  | RNF165   | -        |
| hsa-miR-494 | -       | RNF17    | RNF17    |
| hsa-miR-494 | -       | RNF20    | RNF20    |
| hsa-miR-494 | ROBO2   | ROBO2    | -        |
| hsa-miR-494 | ROCK1   | ROCK1    | -        |
| hsa-miR-494 | -       | RPL31    | RPL31    |
| hsa-miR-494 | RPRD1A  | RPRD1A   | -        |
| hsa-miR-494 | -       | RPS29    | RPS29    |
| hsa-miR-494 | -       | RRS1     | RRS1     |
| hsa-miR-494 | -       | RSRC2    | RSRC2    |
| hsa-miR-494 | RTF1    | RTF1     | -        |
| hsa-miR-494 | RTKN2   | RTKN2    | -        |
| hsa-miR-494 | -       | SAMD7    | SAMD7    |
| hsa-miR-494 | SAP18   | SAP18    | -        |
| hsa-miR-494 | SAR1B   | SAR1B    | -        |
| hsa-miR-494 | SCARB2  | SCARB2   | -        |
| hsa-miR-494 | SCD5    | SCD5     | -        |
| hsa-miR-494 | -       | SCFD1    | SCFD1    |
| hsa-miR-494 | -       | SCGN     | SCGN     |
| hsa-miR-494 | -       | SEC11A   | SEC11A   |
| hsa-miR-494 | -       | SEC22C   | SEC22C   |
| hsa-miR-494 | -       | SEC61G   | SEC61G   |
| hsa-miR-494 | -       | SEMG1    | SEMG1    |
| hsa-miR-494 | -       | SEMG2    | SEMG2    |

|             |          |          |          |
|-------------|----------|----------|----------|
| hsa-miR-494 | SENP1    | SENP1    | -        |
| hsa-miR-494 | -        | SENP3    | SENP3    |
| hsa-miR-494 | SEPT9    | SEPT9    | -        |
| hsa-miR-494 | SERP1    | SERP1    | -        |
| hsa-miR-494 | -        | SERPINB3 | SERPINB3 |
| hsa-miR-494 | -        | SERPINB4 | SERPINB4 |
| hsa-miR-494 | SETD7    | SETD7    | -        |
| hsa-miR-494 | -        | SF1      | SF1      |
| hsa-miR-494 | -        | SFRS4    | SFRS4    |
| hsa-miR-494 | -        | SFRS8    | SFRS8    |
| hsa-miR-494 | SFXN1    | SFXN1    | -        |
| hsa-miR-494 | SGK3     | SGK3     | -        |
| hsa-miR-494 | SGMS2    | SGMS2    | -        |
| hsa-miR-494 | SHANK2   | SHANK2   | -        |
| hsa-miR-494 | SHANK3   | SHANK3   | -        |
| hsa-miR-494 | SHISA2   | SHISA2   | -        |
| hsa-miR-494 | SHROOM3  | SHROOM3  | -        |
| hsa-miR-494 | SIPA1L3  | SIPA1L3  | -        |
| hsa-miR-494 | SIRT1    | SIRT1    | -        |
| hsa-miR-494 | SIRT3    | SIRT3    | -        |
| hsa-miR-494 | -        | SKIL     | SKIL     |
| hsa-miR-494 | SLC12A2  | SLC12A2  | -        |
| hsa-miR-494 | SLC12A5  | SLC12A5  | -        |
| hsa-miR-494 | -        | SLC16A1  | SLC16A1  |
| hsa-miR-494 | SLC22A17 | SLC22A17 | -        |
| hsa-miR-494 | -        | SLC25A13 | SLC25A13 |
| hsa-miR-494 | SLC25A30 | SLC25A30 | -        |
| hsa-miR-494 | SLC25A40 | -        | SLC25A40 |
| hsa-miR-494 | SLC30A4  | SLC30A4  | -        |
| hsa-miR-494 | -        | SLC35A1  | SLC35A1  |
| hsa-miR-494 | -        | SLC35E2  | SLC35E2  |
| hsa-miR-494 | SLC35F5  | SLC35F5  | -        |
| hsa-miR-494 | SLC39A1  | SLC39A1  | -        |
| hsa-miR-494 | -        | SLC39A6  | SLC39A6  |
| hsa-miR-494 | SLC44A5  | SLC44A5  | -        |
| hsa-miR-494 | -        | SLC4A7   | SLC4A7   |
| hsa-miR-494 | SLC7A2   | SLC7A2   | -        |
| hsa-miR-494 | SLC8A2   | SLC8A2   | -        |
| hsa-miR-494 | SLC9A3R2 | SLC9A3R2 | -        |
| hsa-miR-494 | -        | SMARCA1  | SMARCA1  |
| hsa-miR-494 | SMARCA5  | SMARCA5  | -        |
| hsa-miR-494 | SMARCE1  | SMARCE1  | -        |
| hsa-miR-494 | -        | SMURF2   | SMURF2   |
| hsa-miR-494 | -        | SNW1     | SNW1     |
| hsa-miR-494 | SOBP     | -        | SOBP     |
| hsa-miR-494 | SOCS6    | SOCS6    | -        |
| hsa-miR-494 | SORL1    | SORL1    | -        |
| hsa-miR-494 | -        | SOX30    | SOX30    |
| hsa-miR-494 | SOX7     | SOX7     | -        |
| hsa-miR-494 | SP4      | SP4      | -        |
| hsa-miR-494 | -        | SPATA16  | SPATA16  |

|             |         |          |          |
|-------------|---------|----------|----------|
| hsa-miR-494 | SPATA2  | SPATA2   | -        |
| hsa-miR-494 | SPATA5  | SPATA5   | -        |
| hsa-miR-494 | -       | SPCS1    | SPCS1    |
| hsa-miR-494 | -       | SPINK2   | SPINK2   |
| hsa-miR-494 | SPPL3   | SPPL3    | -        |
| hsa-miR-494 | SPRR2G  | SPRR2G   | -        |
| hsa-miR-494 | -       | SPRR3    | SPRR3    |
| hsa-miR-494 | SRFBP1  | SRFBP1   | -        |
| hsa-miR-494 | -       | SRP54    | SRP54    |
| hsa-miR-494 | SRP9    | SRP9     | -        |
| hsa-miR-494 | -       | SRPX     | SRPX     |
| hsa-miR-494 | SS18L1  | SS18L1   | -        |
| hsa-miR-494 | SSX2IP  | SSX2IP   | -        |
| hsa-miR-494 | STAC2   | STAC2    | -        |
| hsa-miR-494 | -       | STAG1    | STAG1    |
| hsa-miR-494 | STAM    | STAM     | -        |
| hsa-miR-494 | -       | STAMBPL1 | STAMBPL1 |
| hsa-miR-494 | -       | STON2    | STON2    |
| hsa-miR-494 | STX12   | STX12    | -        |
| hsa-miR-494 | STXBP5  | STXBP5   | -        |
| hsa-miR-494 | -       | STXBP5L  | STXBP5L  |
| hsa-miR-494 | -       | SVEP1    | SVEP1    |
| hsa-miR-494 | SYNCRIP | SYNCRIP  | -        |
| hsa-miR-494 | -       | SYT15    | SYT15    |
| hsa-miR-494 | TACC1   | TACC1    | -        |
| hsa-miR-494 | TAF4B   | TAF4B    | -        |
| hsa-miR-494 | TAOK3   | TAOK3    | -        |
| hsa-miR-494 | -       | TBC1D3   | TBC1D3   |
| hsa-miR-494 | -       | TBC1D3B  | TBC1D3B  |
| hsa-miR-494 | -       | TBC1D3C  | TBC1D3C  |
| hsa-miR-494 | -       | TBC1D3G  | TBC1D3G  |
| hsa-miR-494 | TBC1D4  | TBC1D4   | -        |
| hsa-miR-494 | TBC1D8  | TBC1D8   | -        |
| hsa-miR-494 | TBL1X   | TBL1X    | -        |
| hsa-miR-494 | TBX5    | TBX5     | -        |
| hsa-miR-494 | TCEA2   | TCEA2    | -        |
| hsa-miR-494 | -       | TCEAL2   | TCEAL2   |
| hsa-miR-494 | TCF20   | TCF20    | -        |
| hsa-miR-494 | TCF7L2  | TCF7L2   | -        |
| hsa-miR-494 | -       | TCP10L   | TCP10L   |
| hsa-miR-494 | TET3    | TET3     | -        |
| hsa-miR-494 | -       | TFPI     | TFPI     |
| hsa-miR-494 | -       | TGIF1    | TGIF1    |
| hsa-miR-494 | -       | THAP4    | THAP4    |
| hsa-miR-494 | -       | THOC4    | THOC4    |
| hsa-miR-494 | -       | TICAM2   | TICAM2   |
| hsa-miR-494 | -       | TLR6     | TLR6     |
| hsa-miR-494 | -       | TM2D1    | TM2D1    |
| hsa-miR-494 | TM4SF1  | TM4SF1   | -        |
| hsa-miR-494 | -       | TMC1     | TMC1     |
| hsa-miR-494 | -       | TMEM106C | TMEM106C |

|             |          |          |          |
|-------------|----------|----------|----------|
| hsa-miR-494 | TMEM135  | TMEM135  | -        |
| hsa-miR-494 | -        | TMPRSS13 | TMPRSS13 |
| hsa-miR-494 | TMX3     | TMX3     | -        |
| hsa-miR-494 | -        | TNFRSF19 | TNFRSF19 |
| hsa-miR-494 | -        | TNFSF11  | TNFSF11  |
| hsa-miR-494 | TNKS     | TNKS     | -        |
| hsa-miR-494 | TNRC6C   | TNRC6C   | -        |
| hsa-miR-494 | -        | TOM1L1   | TOM1L1   |
| hsa-miR-494 | TOR1A    | TOR1A    | -        |
| hsa-miR-494 | TOR1AIP1 | TOR1AIP1 | -        |
| hsa-miR-494 | -        | TPP2     | TPP2     |
| hsa-miR-494 | TRAF3    | TRAF3    | -        |
| hsa-miR-494 | TRAPPC10 | TRAPPC10 | -        |
| hsa-miR-494 | TRERF1   | TRERF1   | -        |
| hsa-miR-494 | -        | TRIM42   | TRIM42   |
| hsa-miR-494 | TRPS1    | TRPS1    | -        |
| hsa-miR-494 | -        | TSC22D1  | TSC22D1  |
| hsa-miR-494 | -        | TSHB     | TSHB     |
| hsa-miR-494 | -        | TSPAN13  | TSPAN13  |
| hsa-miR-494 | -        | TTC14    | TTC14    |
| hsa-miR-494 | TTC39C   | TTC39C   | -        |
| hsa-miR-494 | -        | TTC6     | TTC6     |
| hsa-miR-494 | -        | TTF1     | TTF1     |
| hsa-miR-494 | -        | TTPA     | TTPA     |
| hsa-miR-494 | -        | TXNDC8   | TXNDC8   |
| hsa-miR-494 | -        | TXNL1    | TXNL1    |
| hsa-miR-494 | -        | TXNRD2   | TXNRD2   |
| hsa-miR-494 | TYRO3    | TYRO3    | -        |
| hsa-miR-494 | UBE2K    | UBE2K    | -        |
| hsa-miR-494 | UBE2QL1  | UBE2QL1  | -        |
| hsa-miR-494 | UBFD1    | UBFD1    | -        |
| hsa-miR-494 | UBP1     | UBP1     | -        |
| hsa-miR-494 | -        | UBQLNL   | UBQLNL   |
| hsa-miR-494 | -        | UGT2B17  | UGT2B17  |
| hsa-miR-494 | -        | UIMC1    | UIMC1    |
| hsa-miR-494 | ULK2     | ULK2     | -        |
| hsa-miR-494 | UNC45B   | UNC45B   | -        |
| hsa-miR-494 | USP27X   | -        | USP27X   |
| hsa-miR-494 | USP31    | USP31    | -        |
| hsa-miR-494 | USP36    | USP36    | -        |
| hsa-miR-494 | VASH2    | VASH2    | -        |
| hsa-miR-494 | VCPIP1   | VCPIP1   | -        |
| hsa-miR-494 | -        | VPS13A   | VPS13A   |
| hsa-miR-494 | VPS13C   | VPS13C   | -        |
| hsa-miR-494 | VPS26B   | VPS26B   | -        |
| hsa-miR-494 | -        | WDHD1    | WDHD1    |
| hsa-miR-494 | -        | WDR1     | WDR1     |
| hsa-miR-494 | WDR26    | WDR26    | -        |
| hsa-miR-494 | WDR37    | WDR37    | -        |
| hsa-miR-494 | WDR44    | WDR44    | -        |
| hsa-miR-494 | WDR45L   | WDR45L   | -        |

|             |          |          |          |
|-------------|----------|----------|----------|
| hsa-miR-494 | WDR82    | WDR82    | -        |
| hsa-miR-494 | WIPF1    | WIPF1    | -        |
| hsa-miR-494 | WWC2     | WWC2     | -        |
| hsa-miR-494 | -        | WWC3     | WWC3     |
| hsa-miR-494 | -        | XPOT     | XPOT     |
| hsa-miR-494 | YAF2     | YAF2     | -        |
| hsa-miR-494 | YEATS2   | YEATS2   | -        |
| hsa-miR-494 | -        | YEATS4   | YEATS4   |
| hsa-miR-494 | -        | YIPF3    | YIPF3    |
| hsa-miR-494 | -        | YTHDF2   | YTHDF2   |
| hsa-miR-494 | ZBTB39   | ZBTB39   | -        |
| hsa-miR-494 | ZBTB43   | ZBTB43   | -        |
| hsa-miR-494 | ZC3H12B  | ZC3H12B  | -        |
| hsa-miR-494 | ZFHX3    | ZFHX3    | -        |
| hsa-miR-494 | ZFX      | ZFX      | -        |
| hsa-miR-494 | -        | ZMYM6    | ZMYM6    |
| hsa-miR-494 | -        | ZMYND12  | ZMYND12  |
| hsa-miR-494 | -        | ZNF233   | ZNF233   |
| hsa-miR-494 | -        | ZNF236   | ZNF236   |
| hsa-miR-494 | -        | ZNF239   | ZNF239   |
| hsa-miR-494 | ZNF25    | ZNF25    | -        |
| hsa-miR-494 | ZNF281   | ZNF281   | -        |
| hsa-miR-494 | ZNF292   | ZNF292   | -        |
| hsa-miR-494 | -        | ZNF326   | ZNF326   |
| hsa-miR-494 | -        | ZNF33A   | ZNF33A   |
| hsa-miR-494 | ZNF396   | ZNF396   | -        |
| hsa-miR-494 | -        | ZNF425   | ZNF425   |
| hsa-miR-494 | -        | ZNF570   | ZNF570   |
| hsa-miR-494 | ZNF623   | ZNF623   | -        |
| hsa-miR-494 | -        | ZNF750   | ZNF750   |
| hsa-miR-494 | ZNF770   | ZNF770   | -        |
| hsa-miR-494 | ZNF791   | ZNF791   | -        |
| hsa-miR-494 | ZNF793   | ZNF793   | -        |
| hsa-miR-494 | -        | ZNHIT3   | ZNHIT3   |
| hsa-miR-494 | -        | ZNRF4    | ZNRF4    |
| hsa-miR-494 | -        | ZPBP2    | ZPBP2    |
| hsa-miR-494 | ZZZ3     | ZZZ3     | -        |
| hsa-miR-495 | AASS     | -        | AASS     |
| hsa-miR-495 | ABCE1    | ABCE1    | -        |
| hsa-miR-495 | ABHD2    | ABHD2    | -        |
| hsa-miR-495 | -        | ACRC     | ACRC     |
| hsa-miR-495 | ACTA1    | ACTA1    | -        |
| hsa-miR-495 | ACTR10   | ACTR10   | -        |
| hsa-miR-495 | ACTR1A   | ACTR1A   | -        |
| hsa-miR-495 | ACTR2    | ACTR2    | -        |
| hsa-miR-495 | ADAM12   | ADAM12   | -        |
| hsa-miR-495 | ADAMTS18 | ADAMTS18 | -        |
| hsa-miR-495 | -        | ADAMTS19 | ADAMTS19 |
| hsa-miR-495 | ADAMTS3  | ADAMTS3  | -        |
| hsa-miR-495 | ADAMTSL1 | ADAMTSL1 | -        |
| hsa-miR-495 | ADAT2    | ADAT2    | -        |

|             |          |          |         |
|-------------|----------|----------|---------|
| hsa-miR-495 | ADNP2    | ADNP2    | -       |
| hsa-miR-495 | ADRBK2   | ADRBK2   | -       |
| hsa-miR-495 | AEBP2    | AEBP2    | -       |
| hsa-miR-495 | AGPS     | AGPS     | -       |
| hsa-miR-495 | -        | AGTPBP1  | AGTPBP1 |
| hsa-miR-495 | -        | AK5      | AK5     |
| hsa-miR-495 | -        | AKNA     | AKNA    |
| hsa-miR-495 | ALCAM    | ALCAM    | -       |
| hsa-miR-495 | -        | ALDH6A1  | ALDH6A1 |
| hsa-miR-495 | -        | ALK      | ALK     |
| hsa-miR-495 | -        | ALKBH3   | ALKBH3  |
| hsa-miR-495 | -        | ALOX5AP  | ALOX5AP |
| hsa-miR-495 | -        | ALS2CR4  | ALS2CR4 |
| hsa-miR-495 | AMOT     | AMOT     | -       |
| hsa-miR-495 | AMOTL2   | AMOTL2   | -       |
| hsa-miR-495 | -        | AMPH     | AMPH    |
| hsa-miR-495 | -        | ANAPC11  | ANAPC11 |
| hsa-miR-495 | -        | ANGPTL1  | ANGPTL1 |
| hsa-miR-495 | -        | ANKRA2   | ANKRA2  |
| hsa-miR-495 | -        | ANKRD11  | ANKRD11 |
| hsa-miR-495 | ANKRD13C | ANKRD13C | -       |
| hsa-miR-495 | ANKRD40  | ANKRD40  | -       |
| hsa-miR-495 | -        | ANKRD42  | ANKRD42 |
| hsa-miR-495 | ANKRD7   | ANKRD7   | -       |
| hsa-miR-495 | ANTXR2   | ANTXR2   | -       |
| hsa-miR-495 | ANUBL1   | ANUBL1   | -       |
| hsa-miR-495 | AP1G1    | AP1G1    | -       |
| hsa-miR-495 | AP3M1    | AP3M1    | -       |
| hsa-miR-495 | AP4E1    | AP4E1    | -       |
| hsa-miR-495 | -        | APP      | APP     |
| hsa-miR-495 | APPBP2   | APPBP2   | -       |
| hsa-miR-495 | -        | AQP4     | AQP4    |
| hsa-miR-495 | -        | AQP6     | AQP6    |
| hsa-miR-495 | ARHGAP20 | ARHGAP20 | -       |
| hsa-miR-495 | ARHGAP5  | ARHGAP5  | -       |
| hsa-miR-495 | ARHGEF17 | ARHGEF17 | -       |
| hsa-miR-495 | ARHGEF7  | ARHGEF7  | -       |
| hsa-miR-495 | ARID4A   | ARID4A   | -       |
| hsa-miR-495 | ARID4B   | ARID4B   | -       |
| hsa-miR-495 | ARIH1    | ARIH1    | -       |
| hsa-miR-495 | ARMC8    | ARMC8    | -       |
| hsa-miR-495 | -        | ARR3     | ARR3    |
| hsa-miR-495 | ARRDC3   | ARRDC3   | -       |
| hsa-miR-495 | ASB5     | ASB5     | -       |
| hsa-miR-495 | -        | ASB7     | ASB7    |
| hsa-miR-495 | -        | ASF1A    | ASF1A   |
| hsa-miR-495 | -        | ASZ1     | ASZ1    |
| hsa-miR-495 | ATF7IP2  | ATF7IP2  | -       |
| hsa-miR-495 | -        | ATG16L2  | ATG16L2 |
| hsa-miR-495 | ATP2B2   | ATP2B2   | -       |
| hsa-miR-495 | -        | ATP5F1   | ATP5F1  |

|             |           |           |           |
|-------------|-----------|-----------|-----------|
| hsa-miR-495 | ATP7A     | ATP7A     | -         |
| hsa-miR-495 | ATRN      | ATRN      | -         |
| hsa-miR-495 | ATXN7     | ATXN7     | -         |
| hsa-miR-495 | ATXN7L1   | ATXN7L1   | -         |
| hsa-miR-495 | B3GALNT2  | B3GALNT2  | -         |
| hsa-miR-495 | BAIAP2    | BAIAP2    | -         |
| hsa-miR-495 | BARX2     | BARX2     | -         |
| hsa-miR-495 | -         | BAT2      | BAT2      |
| hsa-miR-495 | BAZ2B     | BAZ2B     | -         |
| hsa-miR-495 | BCL11A    | BCL11A    | -         |
| hsa-miR-495 | BCL11B    | BCL11B    | -         |
| hsa-miR-495 | BCL2L1    | BCL2L1    | -         |
| hsa-miR-495 | BCLAF1    | BCLAF1    | -         |
| hsa-miR-495 | -         | BCOR      | BCOR      |
| hsa-miR-495 | BCORL1    | BCORL1    | -         |
| hsa-miR-495 | BDNF      | BDNF      | -         |
| hsa-miR-495 | BHLHE41   | BHLHE41   | -         |
| hsa-miR-495 | BIN3      | BIN3      | -         |
| hsa-miR-495 | BIVM      | BIVM      | -         |
| hsa-miR-495 | -         | BMP10     | BMP10     |
| hsa-miR-495 | -         | BMP2      | BMP2      |
| hsa-miR-495 | BMP7      | BMP7      | -         |
| hsa-miR-495 | -         | BPIL2     | BPIL2     |
| hsa-miR-495 | BTBD11    | BTBD11    | -         |
| hsa-miR-495 | BTBD9     | BTBD9     | -         |
| hsa-miR-495 | BTF3L4    | BTF3L4    | -         |
| hsa-miR-495 | BTG2      | BTG2      | -         |
| hsa-miR-495 | -         | BTNL8     | BTNL8     |
| hsa-miR-495 | -         | BUB1      | BUB1      |
| hsa-miR-495 | -         | BUD13     | BUD13     |
| hsa-miR-495 | BZW1      | BZW1      | -         |
| hsa-miR-495 | -         | C10orf119 | C10orf119 |
| hsa-miR-495 | -         | C10orf12  | C10orf12  |
| hsa-miR-495 | C10orf140 | C10orf140 | -         |
| hsa-miR-495 | -         | C11orf17  | C11orf17  |
| hsa-miR-495 | C11orf30  | C11orf30  | -         |
| hsa-miR-495 | C11orf41  | C11orf41  | -         |
| hsa-miR-495 | -         | C12orf24  | C12orf24  |
| hsa-miR-495 | -         | C12orf28  | C12orf28  |
| hsa-miR-495 | -         | C13orf31  | C13orf31  |
| hsa-miR-495 | C14orf169 | C14orf169 | -         |
| hsa-miR-495 | -         | C14orf4   | C14orf4   |
| hsa-miR-495 | -         | C17orf58  | C17orf58  |
| hsa-miR-495 | C17orf96  | C17orf96  | -         |
| hsa-miR-495 | C18orf1   | C18orf1   | -         |
| hsa-miR-495 | C18orf25  | C18orf25  | -         |
| hsa-miR-495 | -         | C19orf29  | C19orf29  |
| hsa-miR-495 | -         | C1QTNF9   | C1QTNF9   |
| hsa-miR-495 | -         | C1orf101  | C1orf101  |
| hsa-miR-495 | -         | C1orf135  | C1orf135  |
| hsa-miR-495 | C1orf144  | C1orf144  | -         |



|             |           |           |          |
|-------------|-----------|-----------|----------|
| hsa-miR-495 | C21orf56  | -         | C21orf56 |
| hsa-miR-495 | -         | C21orf62  | C21orf62 |
| hsa-miR-495 | C2CD4C    | C2CD4C    | -        |
| hsa-miR-495 | -         | C2orf43   | C2orf43  |
| hsa-miR-495 | -         | C6orf115  | C6orf115 |
| hsa-miR-495 | C6orf204  | C6orf204  | -        |
| hsa-miR-495 | -         | C6orf62   | C6orf62  |
| hsa-miR-495 | -         | C6orf64   | C6orf64  |
| hsa-miR-495 | -         | C7orf13   | C7orf13  |
| hsa-miR-495 | -         | C8orf4    | C8orf4   |
| hsa-miR-495 | -         | C8orf76   | C8orf76  |
| hsa-miR-495 | C8orf84   | C8orf84   | -        |
| hsa-miR-495 | C9orf170  | C9orf170  | -        |
| hsa-miR-495 | C9orf47   | C9orf47   | -        |
| hsa-miR-495 | -         | C9orf68   | C9orf68  |
| hsa-miR-495 | -         | C9orf78   | C9orf78  |
| hsa-miR-495 | C9orf91   | C9orf91   | -        |
| hsa-miR-495 | CACNA1B   | CACNA1B   | -        |
| hsa-miR-495 | CACNA1D   | CACNA1D   | -        |
| hsa-miR-495 | -         | CADM1     | CADM1    |
| hsa-miR-495 | -         | CADPS2    | CADPS2   |
| hsa-miR-495 | -         | CAMK2B    | CAMK2B   |
| hsa-miR-495 | CAMSAP1L1 | CAMSAP1L1 | -        |
| hsa-miR-495 | CAPN6     | CAPN6     | -        |
| hsa-miR-495 | -         | CAPZA2    | CAPZA2   |
| hsa-miR-495 | -         | CASC3     | CASC3    |
| hsa-miR-495 | CASZ1     | CASZ1     | -        |
| hsa-miR-495 | CBFA2T2   | CBFA2T2   | -        |
| hsa-miR-495 | CBLL1     | CBLL1     | -        |
| hsa-miR-495 | -         | CBX3      | CBX3     |
| hsa-miR-495 | CBX4      | CBX4      | -        |
| hsa-miR-495 | CCAR1     | CCAR1     | -        |
| hsa-miR-495 | -         | CCDC102B  | CCDC102B |
| hsa-miR-495 | CCDC126   | CCDC126   | -        |
| hsa-miR-495 | -         | CCDC135   | CCDC135  |
| hsa-miR-495 | -         | CCDC42    | CCDC42   |
| hsa-miR-495 | CCDC62    | CCDC62    | -        |
| hsa-miR-495 | CCDC88A   | CCDC88A   | -        |
| hsa-miR-495 | -         | CCDC91    | CCDC91   |
| hsa-miR-495 | CCDC92    | CCDC92    | -        |
| hsa-miR-495 | -         | CCL2      | CCL2     |
| hsa-miR-495 | CCNA2     | CCNA2     | -        |
| hsa-miR-495 | -         | CCNE2     | CCNE2    |
| hsa-miR-495 | CD109     | CD109     | -        |
| hsa-miR-495 | CD164     | CD164     | -        |
| hsa-miR-495 | -         | CD9       | CD9      |
| hsa-miR-495 | -         | CDAN1     | CDAN1    |
| hsa-miR-495 | CDC42     | CDC42     | -        |
| hsa-miR-495 | CDC73     | CDC73     | -        |
| hsa-miR-495 | CDCA7     | CDCA7     | -        |
| hsa-miR-495 | CDH1      | CDH1      | -        |

|             |        |          |          |
|-------------|--------|----------|----------|
| hsa-miR-495 | CDK14  | CDK14    | -        |
| hsa-miR-495 | -      | CDKAL1   | CDKAL1   |
| hsa-miR-495 | CDKL3  | CDKL3    | -        |
| hsa-miR-495 | -      | CDS2     | CDS2     |
| hsa-miR-495 | -      | CDYL     | CDYL     |
| hsa-miR-495 | CDYL2  | CDYL2    | -        |
| hsa-miR-495 | CELF1  | CELF1    | -        |
| hsa-miR-495 | CELF2  | CELF2    | -        |
| hsa-miR-495 | CFLAR  | CFLAR    | -        |
| hsa-miR-495 | -      | CH25H    | CH25H    |
| hsa-miR-495 | CHD6   | CHD6     | -        |
| hsa-miR-495 | CHD7   | CHD7     | -        |
| hsa-miR-495 | -      | CHEK1    | CHEK1    |
| hsa-miR-495 | -      | CHRM5    | CHRM5    |
| hsa-miR-495 | -      | CILP     | CILP     |
| hsa-miR-495 | CISD3  | CISD3    | -        |
| hsa-miR-495 | -      | CITED2   | CITED2   |
| hsa-miR-495 | -      | CKAP2    | CKAP2    |
| hsa-miR-495 | CKAP4  | CKAP4    | -        |
| hsa-miR-495 | CLASP1 | CLASP1   | -        |
| hsa-miR-495 | -      | CLCA2    | CLCA2    |
| hsa-miR-495 | -      | CLCC1    | CLCC1    |
| hsa-miR-495 | CLCN5  | CLCN5    | -        |
| hsa-miR-495 | CLDN18 | CLDN18   | -        |
| hsa-miR-495 | -      | CLEC1A   | CLEC1A   |
| hsa-miR-495 | -      | CLEC6A   | CLEC6A   |
| hsa-miR-495 | -      | CLK1     | CLK1     |
| hsa-miR-495 | -      | CLK4     | CLK4     |
| hsa-miR-495 | CLOCK  | CLOCK    | -        |
| hsa-miR-495 | -      | CLTA     | CLTA     |
| hsa-miR-495 | -      | CMTM4    | CMTM4    |
| hsa-miR-495 | CNKSR3 | CNKSR3   | -        |
| hsa-miR-495 | -      | CNNM3    | CNNM3    |
| hsa-miR-495 | CNOT2  | CNOT2    | -        |
| hsa-miR-495 | CNR1   | CNR1     | -        |
| hsa-miR-495 | CNTN2  | CNTN2    | -        |
| hsa-miR-495 | -      | CNTNAP4  | CNTNAP4  |
| hsa-miR-495 | -      | COL4A3BP | COL4A3BP |
| hsa-miR-495 | COL5A1 | COL5A1   | -        |
| hsa-miR-495 | -      | COMMD3   | COMMD3   |
| hsa-miR-495 | COQ7   | COQ7     | -        |
| hsa-miR-495 | -      | CORT     | CORT     |
| hsa-miR-495 | -      | COX7A2L  | COX7A2L  |
| hsa-miR-495 | -      | CPA6     | CPA6     |
| hsa-miR-495 | CPEB2  | CPEB2    | -        |
| hsa-miR-495 | CPEB3  | CPEB3    | -        |
| hsa-miR-495 | CPEB4  | CPEB4    | -        |
| hsa-miR-495 | CREBBP | CREBBP   | -        |
| hsa-miR-495 | CRIM1  | CRIM1    | -        |
| hsa-miR-495 | CRLS1  | CRLS1    | -        |
| hsa-miR-495 | -      | CRTAM    | CRTAM    |

|             |         |         |         |
|-------------|---------|---------|---------|
| hsa-miR-495 | -       | CST9L   | CST9L   |
| hsa-miR-495 | -       | CSTF3   | CSTF3   |
| hsa-miR-495 | -       | CTAG1A  | CTAG1A  |
| hsa-miR-495 | -       | CTAG2   | CTAG2   |
| hsa-miR-495 | CTNND2  | CTNND2  | -       |
| hsa-miR-495 | CUX1    | CUX1    | -       |
| hsa-miR-495 | -       | CXCL11  | CXCL11  |
| hsa-miR-495 | CXorf36 | CXorf36 | -       |
| hsa-miR-495 | CYB5B   | CYB5B   | -       |
| hsa-miR-495 | -       | CYP1B1  | CYP1B1  |
| hsa-miR-495 | CYP26B1 | CYP26B1 | -       |
| hsa-miR-495 | DACT1   | DACT1   | -       |
| hsa-miR-495 | -       | DACT3   | DACT3   |
| hsa-miR-495 | DAG1    | DAG1    | -       |
| hsa-miR-495 | -       | DALRD3  | DALRD3  |
| hsa-miR-495 | -       | DAPP1   | DAPP1   |
| hsa-miR-495 | DBI     | DBI     | -       |
| hsa-miR-495 | DCAF6   | DCAF6   | -       |
| hsa-miR-495 | DCDC2   | DCDC2   | -       |
| hsa-miR-495 | DCLRE1B | DCLRE1B | -       |
| hsa-miR-495 | -       | DDX20   | DDX20   |
| hsa-miR-495 | DDX3X   | DDX3X   | -       |
| hsa-miR-495 | DDX3Y   | DDX3Y   | -       |
| hsa-miR-495 | -       | DEGS2   | DEGS2   |
| hsa-miR-495 | DENND1B | DENND1B | -       |
| hsa-miR-495 | -       | DFFB    | DFFB    |
| hsa-miR-495 | DGKB    | DGKB    | -       |
| hsa-miR-495 | DHX40   | DHX40   | -       |
| hsa-miR-495 | DICER1  | DICER1  | -       |
| hsa-miR-495 | DIS3    | DIS3    | -       |
| hsa-miR-495 | DLG1    | DLG1    | -       |
| hsa-miR-495 | DLL1    | DLL1    | -       |
| hsa-miR-495 | DMD     | DMD     | -       |
| hsa-miR-495 | DMRT1   | DMRT1   | -       |
| hsa-miR-495 | -       | DNAH7   | DNAH7   |
| hsa-miR-495 | -       | DNAJC12 | DNAJC12 |
| hsa-miR-495 | DNAJC14 | DNAJC14 | -       |
| hsa-miR-495 | DNAJC3  | DNAJC3  | -       |
| hsa-miR-495 | -       | DNER    | DNER    |
| hsa-miR-495 | -       | DNMT1   | DNMT1   |
| hsa-miR-495 | DPF1    | DPF1    | -       |
| hsa-miR-495 | DPP10   | DPP10   | -       |
| hsa-miR-495 | DPP8    | DPP8    | -       |
| hsa-miR-495 | DSEL    | DSEL    | -       |
| hsa-miR-495 | -       | DUOX2   | DUOX2   |
| hsa-miR-495 | -       | DUSP1   | DUSP1   |
| hsa-miR-495 | -       | DUSP11  | DUSP11  |
| hsa-miR-495 | -       | DUSP6   | DUSP6   |
| hsa-miR-495 | -       | DUSP9   | DUSP9   |
| hsa-miR-495 | -       | DYDC1   | DYDC1   |
| hsa-miR-495 | DYRK1A  | DYRK1A  | -       |

|             |          |          |         |
|-------------|----------|----------|---------|
| hsa-miR-495 | E2F2     | E2F2     | -       |
| hsa-miR-495 | -        | E2F5     | E2F5    |
| hsa-miR-495 | EARS2    | EARS2    | -       |
| hsa-miR-495 | EBF3     | EBF3     | -       |
| hsa-miR-495 | -        | ECHDC1   | ECHDC1  |
| hsa-miR-495 | -        | EED      | EED     |
| hsa-miR-495 | -        | EEF1A1   | EEF1A1  |
| hsa-miR-495 | -        | EEF1E1   | EEF1E1  |
| hsa-miR-495 | -        | EFCAB4B  | EFCAB4B |
| hsa-miR-495 | -        | EFCAB5   | EFCAB5  |
| hsa-miR-495 | EHF      | EHF      | -       |
| hsa-miR-495 | EID1     | EID1     | -       |
| hsa-miR-495 | EIF1AX   | EIF1AX   | -       |
| hsa-miR-495 | EIF4EBP2 | EIF4EBP2 | -       |
| hsa-miR-495 | -        | EIF4G3   | EIF4G3  |
| hsa-miR-495 | ELAVL1   | ELAVL1   | -       |
| hsa-miR-495 | ELK1     | ELK1     | -       |
| hsa-miR-495 | -        | ELMOD1   | ELMOD1  |
| hsa-miR-495 | ELOVL7   | ELOVL7   | -       |
| hsa-miR-495 | -        | EMR3     | EMR3    |
| hsa-miR-495 | EMX2     | EMX2     | -       |
| hsa-miR-495 | -        | ENTPD1   | ENTPD1  |
| hsa-miR-495 | EP300    | EP300    | -       |
| hsa-miR-495 | EPB41L2  | EPB41L2  | -       |
| hsa-miR-495 | EPB41L4B | EPB41L4B | -       |
| hsa-miR-495 | EPC2     | EPC2     | -       |
| hsa-miR-495 | EPHA3    | EPHA3    | -       |
| hsa-miR-495 | EPHB2    | EPHB2    | -       |
| hsa-miR-495 | EPS15    | EPS15    | -       |
| hsa-miR-495 | -        | ERICH1   | ERICH1  |
| hsa-miR-495 | -        | ESAM     | ESAM    |
| hsa-miR-495 | ETF1     | ETF1     | -       |
| hsa-miR-495 | ETS1     | ETS1     | -       |
| hsa-miR-495 | EVC2     | EVC2     | -       |
| hsa-miR-495 | -        | EXOC3    | EXOC3   |
| hsa-miR-495 | EZR      | EZR      | -       |
| hsa-miR-495 | F11R     | F11R     | -       |
| hsa-miR-495 | -        | FAM105A  | FAM105A |
| hsa-miR-495 | FAM108C1 | FAM108C1 | -       |
| hsa-miR-495 | FAM120A  | FAM120A  | -       |
| hsa-miR-495 | FAM125B  | FAM125B  | -       |
| hsa-miR-495 | FAM126B  | FAM126B  | -       |
| hsa-miR-495 | FAM133B  | FAM133B  | -       |
| hsa-miR-495 | FAM135B  | FAM135B  | -       |
| hsa-miR-495 | FAM169A  | FAM169A  | -       |
| hsa-miR-495 | FAM178A  | FAM178A  | -       |
| hsa-miR-495 | FAM199X  | FAM199X  | -       |
| hsa-miR-495 | -        | FAM3B    | FAM3B   |
| hsa-miR-495 | FAM43A   | FAM43A   | -       |
| hsa-miR-495 | -        | FAM46B   | FAM46B  |
| hsa-miR-495 | -        | FAM69B   | FAM69B  |

|             |         |          |          |
|-------------|---------|----------|----------|
| hsa-miR-495 | FAM91A1 | FAM91A1  | -        |
| hsa-miR-495 | -       | FAM9C    | FAM9C    |
| hsa-miR-495 | -       | FARP1    | FARP1    |
| hsa-miR-495 | -       | FASN     | FASN     |
| hsa-miR-495 | FAT4    | FAT4     | -        |
| hsa-miR-495 | FBXO11  | FBXO11   | -        |
| hsa-miR-495 | FBXO28  | FBXO28   | -        |
| hsa-miR-495 | FBXO45  | FBXO45   | -        |
| hsa-miR-495 | -       | FBXO7    | FBXO7    |
| hsa-miR-495 | -       | FCRL4    | FCRL4    |
| hsa-miR-495 | -       | FFAR2    | FFAR2    |
| hsa-miR-495 | -       | FGF17    | FGF17    |
| hsa-miR-495 | FGF7    | FGF7     | -        |
| hsa-miR-495 | FGFR1OP | FGFR1OP  | -        |
| hsa-miR-495 | FGFRL1  | FGFRL1   | -        |
| hsa-miR-495 | FIGNL2  | FIGNL2   | -        |
| hsa-miR-495 | -       | FIP1L1   | FIP1L1   |
| hsa-miR-495 | -       | FKBP3    | FKBP3    |
| hsa-miR-495 | FKBP5   | FKBP5    | -        |
| hsa-miR-495 | FKTN    | FKTN     | -        |
| hsa-miR-495 | -       | FMO5     | FMO5     |
| hsa-miR-495 | -       | FNBP1    | FNBP1    |
| hsa-miR-495 | FNBP1L  | FNBP1L   | -        |
| hsa-miR-495 | FOXC1   | FOXC1    | -        |
| hsa-miR-495 | FOXG1   | FOXG1    | -        |
| hsa-miR-495 | FO XK2  | FO XK2   | -        |
| hsa-miR-495 | FOXO1   | FOXO1    | -        |
| hsa-miR-495 | -       | FPGT     | FPGT     |
| hsa-miR-495 | FRAS1   | FRAS1    | -        |
| hsa-miR-495 | FRMPD4  | FRMPD4   | -        |
| hsa-miR-495 | FXR1    | FXR1     | -        |
| hsa-miR-495 | -       | FXYD6    | FXYD6    |
| hsa-miR-495 | FZD8    | FZD8     | -        |
| hsa-miR-495 | GABBR2  | GABBR2   | -        |
| hsa-miR-495 | GABRA1  | GABRA1   | -        |
| hsa-miR-495 | -       | GABRA2   | GABRA2   |
| hsa-miR-495 | -       | GABRQ    | GABRQ    |
| hsa-miR-495 | GAD2    | GAD2     | -        |
| hsa-miR-495 | GALNT1  | GALNT1   | -        |
| hsa-miR-495 | GAP43   | GAP43    | -        |
| hsa-miR-495 | GAS1    | GAS1     | -        |
| hsa-miR-495 | -       | GATA3    | GATA3    |
| hsa-miR-495 | GCC2    | GCC2     | -        |
| hsa-miR-495 | GCOM1   | GCOM1    | -        |
| hsa-miR-495 | -       | GLCCI1   | GLCCI1   |
| hsa-miR-495 | GLI3    | GLI3     | -        |
| hsa-miR-495 | -       | GLIPR1L1 | GLIPR1L1 |
| hsa-miR-495 | GLIS3   | GLIS3    | -        |
| hsa-miR-495 | -       | GLYAT    | GLYAT    |
| hsa-miR-495 | GMFB    | GMFB     | -        |
| hsa-miR-495 | -       | GML      | GML      |

|             |          |          |          |
|-------------|----------|----------|----------|
| hsa-miR-495 | -        | GNG11    | GNG11    |
| hsa-miR-495 | GNG12    | GNG12    | -        |
| hsa-miR-495 | GNG2     | GNG2     | -        |
| hsa-miR-495 | GNG4     | GNG4     | -        |
| hsa-miR-495 | -        | GOLGB1   | GOLGB1   |
| hsa-miR-495 | GPCPD1   | GPCPD1   | -        |
| hsa-miR-495 | GPD1     | GPD1     | -        |
| hsa-miR-495 | -        | GPR125   | GPR125   |
| hsa-miR-495 | -        | GPR146   | GPR146   |
| hsa-miR-495 | GPR3     | GPR3     | -        |
| hsa-miR-495 | -        | GPR75    | GPR75    |
| hsa-miR-495 | -        | GPR87    | GPR87    |
| hsa-miR-495 | GRAMD4   | GRAMD4   | -        |
| hsa-miR-495 | GRIA3    | GRIA3    | -        |
| hsa-miR-495 | -        | GRINL1A  | GRINL1A  |
| hsa-miR-495 | -        | GRM7     | GRM7     |
| hsa-miR-495 | -        | GRWD1    | GRWD1    |
| hsa-miR-495 | -        | GSTA1    | GSTA1    |
| hsa-miR-495 | -        | GTF2E2   | GTF2E2   |
| hsa-miR-495 | -        | GTF3A    | GTF3A    |
| hsa-miR-495 | GTPBP1   | GTPBP1   | -        |
| hsa-miR-495 | GZF1     | GZF1     | -        |
| hsa-miR-495 | HBEGF    | HBEGF    | -        |
| hsa-miR-495 | -        | HCLS1    | HCLS1    |
| hsa-miR-495 | -        | HDAC8    | HDAC8    |
| hsa-miR-495 | -        | HDDC2    | HDDC2    |
| hsa-miR-495 | HERC3    | HERC3    | -        |
| hsa-miR-495 | -        | HES2     | HES2     |
| hsa-miR-495 | -        | HHIP     | HHIP     |
| hsa-miR-495 | -        | HIP1     | HIP1     |
| hsa-miR-495 | HIPK1    | HIPK1    | -        |
| hsa-miR-495 | HIVEP2   | HIVEP2   | -        |
| hsa-miR-495 | HMGB1    | HMGB1    | -        |
| hsa-miR-495 | HMP19    | HMP19    | -        |
| hsa-miR-495 | -        | HNF4G    | HNF4G    |
| hsa-miR-495 | HNRNPF   | HNRNPF   | -        |
| hsa-miR-495 | HNRNPH1  | HNRNPH1  | -        |
| hsa-miR-495 | HNRNPH2  | HNRNPH2  | -        |
| hsa-miR-495 | HNRNPU   | HNRNPU   | -        |
| hsa-miR-495 | HNRNPUL2 | HNRNPUL2 | -        |
| hsa-miR-495 | -        | HOXC6    | HOXC6    |
| hsa-miR-495 | HOXC8    | HOXC8    | -        |
| hsa-miR-495 | HSDL2    | HSDL2    | -        |
| hsa-miR-495 | -        | HSF2     | HSF2     |
| hsa-miR-495 | HSP90AA1 | HSP90AA1 | -        |
| hsa-miR-495 | -        | HSP90AB1 | HSP90AB1 |
| hsa-miR-495 | HSPA13   | HSPA13   | -        |
| hsa-miR-495 | -        | HSPA1B   | HSPA1B   |
| hsa-miR-495 | -        | HSPA2    | HSPA2    |
| hsa-miR-495 | -        | HSPA4    | HSPA4    |
| hsa-miR-495 | HSPA5    | HSPA5    | -        |

|             |          |          |          |
|-------------|----------|----------|----------|
| hsa-miR-495 | HTR2C    | HTR2C    | -        |
| hsa-miR-495 | -        | HTRA1    | HTRA1    |
| hsa-miR-495 | -        | HUWE1    | HUWE1    |
| hsa-miR-495 | -        | IAPP     | IAPP     |
| hsa-miR-495 | -        | IBTK     | IBTK     |
| hsa-miR-495 | ID1      | ID1      | -        |
| hsa-miR-495 | -        | IFNA10   | IFNA10   |
| hsa-miR-495 | IGF1     | IGF1     | -        |
| hsa-miR-495 | -        | IL13RA1  | IL13RA1  |
| hsa-miR-495 | -        | IL1B     | IL1B     |
| hsa-miR-495 | -        | IL25     | IL25     |
| hsa-miR-495 | ILF3     | ILF3     | -        |
| hsa-miR-495 | -        | IMPA1    | IMPA1    |
| hsa-miR-495 | IMPACT   | IMPACT   | -        |
| hsa-miR-495 | -        | INPP4B   | INPP4B   |
| hsa-miR-495 | INTS6    | INTS6    | -        |
| hsa-miR-495 | IP6K3    | IP6K3    | -        |
| hsa-miR-495 | IPCEF1   | IPCEF1   | -        |
| hsa-miR-495 | IQSEC1   | IQSEC1   | -        |
| hsa-miR-495 | IRF2BP2  | IRF2BP2  | -        |
| hsa-miR-495 | IRS1     | IRS1     | -        |
| hsa-miR-495 | -        | IRX3     | IRX3     |
| hsa-miR-495 | -        | ITFG1    | ITFG1    |
| hsa-miR-495 | -        | ITGB5    | ITGB5    |
| hsa-miR-495 | -        | ITM2B    | ITM2B    |
| hsa-miR-495 | ITPK1    | ITPK1    | -        |
| hsa-miR-495 | ITPR2    | ITPR2    | -        |
| hsa-miR-495 | -        | ITSN2    | ITSN2    |
| hsa-miR-495 | JAZF1    | JAZF1    | -        |
| hsa-miR-495 | JDP2     | JDP2     | -        |
| hsa-miR-495 | JMJD1C   | JMJD1C   | -        |
| hsa-miR-495 | -        | JMJD5    | JMJD5    |
| hsa-miR-495 | JOSD1    | JOSD1    | -        |
| hsa-miR-495 | -        | JUN      | JUN      |
| hsa-miR-495 | -        | JUNB     | JUNB     |
| hsa-miR-495 | KAT2B    | KAT2B    | -        |
| hsa-miR-495 | KCNIP1   | KCNIP1   | -        |
| hsa-miR-495 | -        | KCTD1    | KCTD1    |
| hsa-miR-495 | -        | KCTD3    | KCTD3    |
| hsa-miR-495 | KDM4A    | KDM4A    | -        |
| hsa-miR-495 | KHSRP    | KHSRP    | -        |
| hsa-miR-495 | KIAA0101 | KIAA0101 | -        |
| hsa-miR-495 | KIAA0182 | KIAA0182 | -        |
| hsa-miR-495 | KIAA0240 | KIAA0240 | -        |
| hsa-miR-495 | -        | KIAA0391 | KIAA0391 |
| hsa-miR-495 | KIAA0494 | KIAA0494 | -        |
| hsa-miR-495 | KIAA1024 | KIAA1024 | -        |
| hsa-miR-495 | KIAA1033 | KIAA1033 | -        |
| hsa-miR-495 | KIAA1239 | KIAA1239 | -        |
| hsa-miR-495 | KIAA1267 | KIAA1267 | -        |
| hsa-miR-495 | KIAA1324 | KIAA1324 | -        |

|             |          |          |         |
|-------------|----------|----------|---------|
| hsa-miR-495 | KIAA1486 | KIAA1486 | -       |
| hsa-miR-495 | KIAA1598 | KIAA1598 | -       |
| hsa-miR-495 | KIAA2022 | KIAA2022 | -       |
| hsa-miR-495 | -        | KIFAP3   | KIFAP3  |
| hsa-miR-495 | KIN      | KIN      | -       |
| hsa-miR-495 | KLF5     | KLF5     | -       |
| hsa-miR-495 | KLHDC10  | KLHDC10  | -       |
| hsa-miR-495 | KLHL15   | KLHL15   | -       |
| hsa-miR-495 | -        | KLK11    | KLK11   |
| hsa-miR-495 | -        | KPNA2    | KPNA2   |
| hsa-miR-495 | -        | KRCC1    | KRCC1   |
| hsa-miR-495 | -        | KRT28    | KRT28   |
| hsa-miR-495 | -        | KRT34    | KRT34   |
| hsa-miR-495 | -        | LAGE3    | LAGE3   |
| hsa-miR-495 | -        | LALBA    | LALBA   |
| hsa-miR-495 | LANCL2   | LANCL2   | -       |
| hsa-miR-495 | -        | LAPTM4A  | LAPTM4A |
| hsa-miR-495 | LARGE    | LARGE    | -       |
| hsa-miR-495 | -        | LARP6    | LARP6   |
| hsa-miR-495 | -        | LASS5    | LASS5   |
| hsa-miR-495 | -        | LBR      | LBR     |
| hsa-miR-495 | -        | LBX2     | LBX2    |
| hsa-miR-495 | LCLAT1   | LCLAT1   | -       |
| hsa-miR-495 | -        | LCMT2    | LCMT2   |
| hsa-miR-495 | LDLRAD3  | LDLRAD3  | -       |
| hsa-miR-495 | LEPRE1   | LEPRE1   | -       |
| hsa-miR-495 | -        | LGMN     | LGMN    |
| hsa-miR-495 | LHFPL2   | LHFPL2   | -       |
| hsa-miR-495 | LHFPL3   | LHFPL3   | -       |
| hsa-miR-495 | LHX2     | LHX2     | -       |
| hsa-miR-495 | LHX6     | LHX6     | -       |
| hsa-miR-495 | LIMCH1   | LIMCH1   | -       |
| hsa-miR-495 | LIMS1    | LIMS1    | -       |
| hsa-miR-495 | -        | LIMS2    | LIMS2   |
| hsa-miR-495 | -        | LIPE     | LIPE    |
| hsa-miR-495 | -        | LIPF     | LIPF    |
| hsa-miR-495 | -        | LMBRD2   | LMBRD2  |
| hsa-miR-495 | LPCAT3   | LPCAT3   | -       |
| hsa-miR-495 | LPHN2    | LPHN2    | -       |
| hsa-miR-495 | LPPR4    | LPPR4    | -       |
| hsa-miR-495 | LRP1B    | LRP1B    | -       |
| hsa-miR-495 | -        | LRRC8D   | LRRC8D  |
| hsa-miR-495 | -        | LRRN1    | LRRN1   |
| hsa-miR-495 | LRRTM3   | LRRTM3   | -       |
| hsa-miR-495 | -        | LRRTM4   | LRRTM4  |
| hsa-miR-495 | LRTM2    | LRTM2    | -       |
| hsa-miR-495 | -        | LSM4     | LSM4    |
| hsa-miR-495 | LUC7L3   | LUC7L3   | -       |
| hsa-miR-495 | -        | LY9      | LY9     |
| hsa-miR-495 | MACROD2  | MACROD2  | -       |
| hsa-miR-495 | -        | MAD2L1   | MAD2L1  |



|             |          |          |          |
|-------------|----------|----------|----------|
| hsa-miR-495 | -        | MALT1    | MALT1    |
| hsa-miR-495 | -        | MAML2    | MAML2    |
| hsa-miR-495 | MAML3    | MAML3    | -        |
| hsa-miR-495 | -        | MANBAL   | MANBAL   |
| hsa-miR-495 | MAOA     | MAOA     | -        |
| hsa-miR-495 | MAP3K1   | MAP3K1   | -        |
| hsa-miR-495 | MAP3K2   | MAP3K2   | -        |
| hsa-miR-495 | -        | MAP4K2   | MAP4K2   |
| hsa-miR-495 | MAP4K4   | MAP4K4   | -        |
| hsa-miR-495 | MAPK10   | MAPK10   | -        |
| hsa-miR-495 | -        | MAPK4    | MAPK4    |
| hsa-miR-495 | -        | MAPKAPK5 | MAPKAPK5 |
| hsa-miR-495 | -        | MARCH1   | MARCH1   |
| hsa-miR-495 | MARCKS   | MARCKS   | -        |
| hsa-miR-495 | MARS2    | MARS2    | -        |
| hsa-miR-495 | MBLAC2   | MBLAC2   | -        |
| hsa-miR-495 | MBNL1    | MBNL1    | -        |
| hsa-miR-495 | MBNL2    | MBNL2    | -        |
| hsa-miR-495 | MBTD1    | MBTD1    | -        |
| hsa-miR-495 | -        | MBTPS1   | MBTPS1   |
| hsa-miR-495 | -        | MCHR1    | MCHR1    |
| hsa-miR-495 | -        | MCM2     | MCM2     |
| hsa-miR-495 | MCTP2    | MCTP2    | -        |
| hsa-miR-495 | MEAF6    | MEAF6    | -        |
| hsa-miR-495 | MECOM    | MECOM    | -        |
| hsa-miR-495 | MED12    | MED12    | -        |
| hsa-miR-495 | MED12L   | MED12L   | -        |
| hsa-miR-495 | MEF2C    | MEF2C    | -        |
| hsa-miR-495 | -        | METT11D1 | METT11D1 |
| hsa-miR-495 | MEX3C    | MEX3C    | -        |
| hsa-miR-495 | -        | MGA      | MGA      |
| hsa-miR-495 | MGAT4A   | MGAT4A   | -        |
| hsa-miR-495 | MIB1     | MIB1     | -        |
| hsa-miR-495 | MIDN     | MIDN     | -        |
| hsa-miR-495 | MIPOL1   | MIPOL1   | -        |
| hsa-miR-495 | -        | MKRN3    | MKRN3    |
| hsa-miR-495 | MLEC     | MLEC     | -        |
| hsa-miR-495 | MLL2     | MLL2     | -        |
| hsa-miR-495 | MLLT1    | MLLT1    | -        |
| hsa-miR-495 | MLYCD    | MLYCD    | -        |
| hsa-miR-495 | MMRN1    | MMRN1    | -        |
| hsa-miR-495 | -        | MORF4L2  | MORF4L2  |
| hsa-miR-495 | MPHOSPH9 | MPHOSPH9 | -        |
| hsa-miR-495 | -        | MPPED2   | MPPED2   |
| hsa-miR-495 | MPRIP    | MPRIP    | -        |
| hsa-miR-495 | -        | MRPL20   | MRPL20   |
| hsa-miR-495 | -        | MRPL43   | MRPL43   |
| hsa-miR-495 | -        | MRPS5    | MRPS5    |
| hsa-miR-495 | -        | MSRA     | MSRA     |
| hsa-miR-495 | MSX1     | MSX1     | -        |
| hsa-miR-495 | MTA3     | MTA3     | -        |

|             |          |          |        |
|-------------|----------|----------|--------|
| hsa-miR-495 | -        | MTF2     | MTF2   |
| hsa-miR-495 | MTHFD2L  | MTHFD2L  | -      |
| hsa-miR-495 | -        | MTL5     | MTL5   |
| hsa-miR-495 | -        | MTTP     | MTTP   |
| hsa-miR-495 | MYCBP    | MYCBP    | -      |
| hsa-miR-495 | -        | MYCL1    | MYCL1  |
| hsa-miR-495 | MYEF2    | MYEF2    | -      |
| hsa-miR-495 | -        | MYH15    | MYH15  |
| hsa-miR-495 | -        | MYNN     | MYNN   |
| hsa-miR-495 | MYO10    | MYO10    | -      |
| hsa-miR-495 | MYT1     | MYT1     | -      |
| hsa-miR-495 | MYT1L    | MYT1L    | -      |
| hsa-miR-495 | NAALADL2 | NAALADL2 | -      |
| hsa-miR-495 | NAP1L1   | NAP1L1   | -      |
| hsa-miR-495 | NAT14    | NAT14    | -      |
| hsa-miR-495 | NCAM2    | NCAM2    | -      |
| hsa-miR-495 | -        | NCF2     | NCF2   |
| hsa-miR-495 | -        | NCL      | NCL    |
| hsa-miR-495 | NCOA1    | NCOA1    | -      |
| hsa-miR-495 | -        | NDN      | NDN    |
| hsa-miR-495 | -        | NDUFB6   | NDUFB6 |
| hsa-miR-495 | -        | NEDD1    | NEDD1  |
| hsa-miR-495 | NEDD4    | NEDD4    | -      |
| hsa-miR-495 | NEDD4L   | NEDD4L   | -      |
| hsa-miR-495 | NEGR1    | NEGR1    | -      |
| hsa-miR-495 | -        | NEIL3    | NEIL3  |
| hsa-miR-495 | -        | NEK10    | NEK10  |
| hsa-miR-495 | NEK7     | NEK7     | -      |
| hsa-miR-495 | NEO1     | NEO1     | -      |
| hsa-miR-495 | NETO1    | NETO1    | -      |
| hsa-miR-495 | NEUROG2  | NEUROG2  | -      |
| hsa-miR-495 | NFYB     | NFYB     | -      |
| hsa-miR-495 | NHLRC3   | NHLRC3   | -      |
| hsa-miR-495 | -        | NIF3L1   | NIF3L1 |
| hsa-miR-495 | -        | NIPA2    | NIPA2  |
| hsa-miR-495 | NIPBL    | NIPBL    | -      |
| hsa-miR-495 | NKAIN2   | NKAIN2   | -      |
| hsa-miR-495 | NKX2-1   | NKX2-1   | -      |
| hsa-miR-495 | NMT2     | NMT2     | -      |
| hsa-miR-495 | -        | NOD2     | NOD2   |
| hsa-miR-495 | NOTCH1   | NOTCH1   | -      |
| hsa-miR-495 | NOVA1    | NOVA1    | -      |
| hsa-miR-495 | NPAS2    | NPAS2    | -      |
| hsa-miR-495 | NPAS3    | NPAS3    | -      |
| hsa-miR-495 | NR2F2    | NR2F2    | -      |
| hsa-miR-495 | -        | NR2F6    | NR2F6  |
| hsa-miR-495 | NR6A1    | NR6A1    | -      |
| hsa-miR-495 | -        | NRBF2    | NRBF2  |
| hsa-miR-495 | NRF1     | NRF1     | -      |
| hsa-miR-495 | NRK      | NRK      | -      |
| hsa-miR-495 | -        | NRP1     | NRP1   |

|             |          |          |        |
|-------------|----------|----------|--------|
| hsa-miR-495 | NRXN1    | NRXN1    | -      |
| hsa-miR-495 | NRXN2    | NRXN2    | -      |
| hsa-miR-495 | -        | NSUN3    | NSUN3  |
| hsa-miR-495 | NTM      | NTM      | -      |
| hsa-miR-495 | NUP43    | NUP43    | -      |
| hsa-miR-495 | OBFC2A   | OBFC2A   | -      |
| hsa-miR-495 | ODZ2     | ODZ2     | -      |
| hsa-miR-495 | -        | OLFML1   | OLFML1 |
| hsa-miR-495 | -        | OPA1     | OPA1   |
| hsa-miR-495 | -        | OR2L13   | OR2L13 |
| hsa-miR-495 | -        | OSR2     | OSR2   |
| hsa-miR-495 | -        | OTUD4    | OTUD4  |
| hsa-miR-495 | OTUD7B   | OTUD7B   | -      |
| hsa-miR-495 | -        | OVOL2    | OVOL2  |
| hsa-miR-495 | -        | P4HA1    | P4HA1  |
| hsa-miR-495 | -        | P4HA2    | P4HA2  |
| hsa-miR-495 | -        | PABPC5   | PABPC5 |
| hsa-miR-495 | -        | PAF1     | PAF1   |
| hsa-miR-495 | PAFAH1B2 | PAFAH1B2 | -      |
| hsa-miR-495 | PAIP1    | PAIP1    | -      |
| hsa-miR-495 | PAIP2    | PAIP2    | -      |
| hsa-miR-495 | -        | PAK3     | PAK3   |
| hsa-miR-495 | PAPD5    | PAPD5    | -      |
| hsa-miR-495 | -        | PAPLN    | PAPLN  |
| hsa-miR-495 | PAQR9    | PAQR9    | -      |
| hsa-miR-495 | PARP11   | PARP11   | -      |
| hsa-miR-495 | -        | PARP6    | PARP6  |
| hsa-miR-495 | -        | PAWR     | PAWR   |
| hsa-miR-495 | -        | PCDH20   | PCDH20 |
| hsa-miR-495 | PCDH9    | PCDH9    | -      |
| hsa-miR-495 | -        | PCNXL2   | PCNXL2 |
| hsa-miR-495 | PDE7A    | PDE7A    | -      |
| hsa-miR-495 | -        | PDGFA    | PDGFA  |
| hsa-miR-495 | PDGFD    | PDGFD    | -      |
| hsa-miR-495 | -        | PDHA1    | PDHA1  |
| hsa-miR-495 | -        | PDHB     | PDHB   |
| hsa-miR-495 | PDLIM5   | PDLIM5   | -      |
| hsa-miR-495 | PDS5A    | PDS5A    | -      |
| hsa-miR-495 | PER2     | PER2     | -      |
| hsa-miR-495 | -        | PEX3     | PEX3   |
| hsa-miR-495 | PHC3     | PHC3     | -      |
| hsa-miR-495 | PHF1     | PHF1     | -      |
| hsa-miR-495 | -        | PHF13    | PHF13  |
| hsa-miR-495 | PHF14    | PHF14    | -      |
| hsa-miR-495 | PHF17    | PHF17    | -      |
| hsa-miR-495 | PHF19    | PHF19    | -      |
| hsa-miR-495 | -        | PHF3     | PHF3   |
| hsa-miR-495 | -        | PHF7     | PHF7   |
| hsa-miR-495 | PHOX2B   | PHOX2B   | -      |
| hsa-miR-495 | PI15     | PI15     | -      |
| hsa-miR-495 | PIGU     | PIGU     | -      |

|             |          |          |         |
|-------------|----------|----------|---------|
| hsa-miR-495 | -        | PIK3AP1  | PIK3AP1 |
| hsa-miR-495 | -        | PKD1L1   | PKD1L1  |
| hsa-miR-495 | -        | PKIB     | PKIB    |
| hsa-miR-495 | PLAGL2   | PLAGL2   | -       |
| hsa-miR-495 | PLCL1    | PLCL1    | -       |
| hsa-miR-495 | PLEKHA2  | PLEKHA2  | -       |
| hsa-miR-495 | PLEKHG2  | PLEKHG2  | -       |
| hsa-miR-495 | -        | PLEKHH3  | PLEKHH3 |
| hsa-miR-495 | -        | PNN      | PNN     |
| hsa-miR-495 | -        | POLG2    | POLG2   |
| hsa-miR-495 | -        | POLR2A   | POLR2A  |
| hsa-miR-495 | -        | POLR2B   | POLR2B  |
| hsa-miR-495 | PORCN    | PORCN    | -       |
| hsa-miR-495 | POU2F1   | -        | POU2F1  |
| hsa-miR-495 | POU3F1   | POU3F1   | -       |
| hsa-miR-495 | POU6F1   | POU6F1   | -       |
| hsa-miR-495 | PPARGC1A | PPARGC1A | -       |
| hsa-miR-495 | PPHLN1   | PPHLN1   | -       |
| hsa-miR-495 | -        | PPIA     | PPIA    |
| hsa-miR-495 | -        | PPID     | PPID    |
| hsa-miR-495 | PPM1K    | PPM1K    | -       |
| hsa-miR-495 | PPME1    | PPME1    | -       |
| hsa-miR-495 | PPP1CB   | PPP1CB   | -       |
| hsa-miR-495 | PPP1R9A  | PPP1R9A  | -       |
| hsa-miR-495 | PPP2R2C  | PPP2R2C  | -       |
| hsa-miR-495 | PPP2R5E  | PPP2R5E  | -       |
| hsa-miR-495 | PPP3CA   | PPP3CA   | -       |
| hsa-miR-495 | -        | PPP3CC   | PPP3CC  |
| hsa-miR-495 | PPP4C    | PPP4C    | -       |
| hsa-miR-495 | -        | PPYR1    | PPYR1   |
| hsa-miR-495 | PRDM16   | PRDM16   | -       |
| hsa-miR-495 | PRDM2    | PRDM2    | -       |
| hsa-miR-495 | PRICKLE1 | PRICKLE1 | -       |
| hsa-miR-495 | PRIM2    | PRIM2    | -       |
| hsa-miR-495 | PRKAA2   | PRKAA2   | -       |
| hsa-miR-495 | PRKAR1A  | PRKAR1A  | -       |
| hsa-miR-495 | -        | PRKRA    | PRKRA   |
| hsa-miR-495 | -        | PRPS2    | PRPS2   |
| hsa-miR-495 | -        | PRRG4    | PRRG4   |
| hsa-miR-495 | PRTG     | PRTG     | -       |
| hsa-miR-495 | PRUNE    | PRUNE    | -       |
| hsa-miR-495 | -        | PSMA8    | PSMA8   |
| hsa-miR-495 | -        | PSMC6    | PSMC6   |
| hsa-miR-495 | -        | PSMD14   | PSMD14  |
| hsa-miR-495 | PSME3    | PSME3    | -       |
| hsa-miR-495 | PTCH1    | PTCH1    | -       |
| hsa-miR-495 | PTEN     | PTEN     | -       |
| hsa-miR-495 | -        | PTGES2   | PTGES2  |
| hsa-miR-495 | PTP4A1   | PTP4A1   | -       |
| hsa-miR-495 | PTPDC1   | PTPDC1   | -       |
| hsa-miR-495 | -        | PTPN2    | PTPN2   |

|             |          |          |         |
|-------------|----------|----------|---------|
| hsa-miR-495 | PTPRA    | PTPRA    | -       |
| hsa-miR-495 | PTPRD    | PTPRD    | -       |
| hsa-miR-495 | PTPRE    | PTPRE    | -       |
| hsa-miR-495 | PTPRF    | PTPRF    | -       |
| hsa-miR-495 | PTPRJ    | PTPRJ    | -       |
| hsa-miR-495 | -        | PTPRK    | PTPRK   |
| hsa-miR-495 | -        | PTPRZ1   | PTPRZ1  |
| hsa-miR-495 | PURA     | PURA     | -       |
| hsa-miR-495 | -        | PYGO2    | PYGO2   |
| hsa-miR-495 | QSER1    | QSER1    | -       |
| hsa-miR-495 | QSOX1    | QSOX1    | -       |
| hsa-miR-495 | -        | R3HDM1   | R3HDM1  |
| hsa-miR-495 | RAB11B   | RAB11B   | -       |
| hsa-miR-495 | RAB2A    | RAB2A    | -       |
| hsa-miR-495 | -        | RAB41    | RAB41   |
| hsa-miR-495 | -        | RAD17    | RAD17   |
| hsa-miR-495 | RADIL    | RADIL    | -       |
| hsa-miR-495 | RALBP1   | RALBP1   | -       |
| hsa-miR-495 | RALGAPA2 | RALGAPA2 | -       |
| hsa-miR-495 | -        | RALGPS2  | RALGPS2 |
| hsa-miR-495 | RAPGEF1  | RAPGEF1  | -       |
| hsa-miR-495 | RASAL2   | RASAL2   | -       |
| hsa-miR-495 | RASD2    | RASD2    | -       |
| hsa-miR-495 | -        | RB1CC1   | RB1CC1  |
| hsa-miR-495 | RBM20    | RBM20    | -       |
| hsa-miR-495 | RBM27    | RBM27    | -       |
| hsa-miR-495 | RBM33    | RBM33    | -       |
| hsa-miR-495 | RBMS3    | RBMS3    | -       |
| hsa-miR-495 | -        | BPMS     | BPMS    |
| hsa-miR-495 | RBX1     | RBX1     | -       |
| hsa-miR-495 | RCBTB1   | RCBTB1   | -       |
| hsa-miR-495 | -        | RCN1     | RCN1    |
| hsa-miR-495 | -        | RCN2     | RCN2    |
| hsa-miR-495 | RCOR1    | RCOR1    | -       |
| hsa-miR-495 | REEP3    | REEP3    | -       |
| hsa-miR-495 | RERE     | RERE     | -       |
| hsa-miR-495 | REV3L    | REV3L    | -       |
| hsa-miR-495 | -        | REXO1    | REXO1   |
| hsa-miR-495 | -        | RFC2     | RFC2    |
| hsa-miR-495 | RFX4     | RFX4     | -       |
| hsa-miR-495 | -        | RGS17    | RGS17   |
| hsa-miR-495 | RHBDL3   | RHBDL3   | -       |
| hsa-miR-495 | RHEB     | RHEB     | -       |
| hsa-miR-495 | RHOQ     | RHOQ     | -       |
| hsa-miR-495 | RIC8B    | RIC8B    | -       |
| hsa-miR-495 | RICTOR   | RICTOR   | -       |
| hsa-miR-495 | -        | RIF1     | RIF1    |
| hsa-miR-495 | RIMKLB   | RIMKLB   | -       |
| hsa-miR-495 | RIMS4    | RIMS4    | -       |
| hsa-miR-495 | -        | RLF      | RLF     |
| hsa-miR-495 | -        | RMI1     | RMI1    |

|             |          |          |         |
|-------------|----------|----------|---------|
| hsa-miR-495 | -        | RMND5A   | RMND5A  |
| hsa-miR-495 | RNF138   | RNF138   | -       |
| hsa-miR-495 | -        | RNF183   | RNF183  |
| hsa-miR-495 | RNF4     | RNF4     | -       |
| hsa-miR-495 | RNF41    | RNF41    | -       |
| hsa-miR-495 | RNF8     | RNF8     | -       |
| hsa-miR-495 | -        | RP1L1    | RP1L1   |
| hsa-miR-495 | -        | RPE      | RPE     |
| hsa-miR-495 | RPGRIP1L | RPGRIP1L | -       |
| hsa-miR-495 | RPRD1A   | RPRD1A   | -       |
| hsa-miR-495 | -        | RPRM     | RPRM    |
| hsa-miR-495 | -        | RPS29    | RPS29   |
| hsa-miR-495 | RPS6KA3  | RPS6KA3  | -       |
| hsa-miR-495 | -        | RSAD2    | RSAD2   |
| hsa-miR-495 | -        | RTN4     | RTN4    |
| hsa-miR-495 | -        | RTP4     | RTP4    |
| hsa-miR-495 | RUNDC3B  | RUNDC3B  | -       |
| hsa-miR-495 | RUNX1T1  | RUNX1T1  | -       |
| hsa-miR-495 | RUNX3    | RUNX3    | -       |
| hsa-miR-495 | RYBP     | RYBP     | -       |
| hsa-miR-495 | -        | S100P    | S100P   |
| hsa-miR-495 | S1PR3    | S1PR3    | -       |
| hsa-miR-495 | -        | SAA4     | SAA4    |
| hsa-miR-495 | -        | SAG      | SAG     |
| hsa-miR-495 | SALL1    | SALL1    | -       |
| hsa-miR-495 | SAMD4A   | SAMD4A   | -       |
| hsa-miR-495 | SAMD4B   | SAMD4B   | -       |
| hsa-miR-495 | SATB1    | SATB1    | -       |
| hsa-miR-495 | SATB2    | SATB2    | -       |
| hsa-miR-495 | SCD      | SCD      | -       |
| hsa-miR-495 | -        | SCEL     | SCEL    |
| hsa-miR-495 | SCG2     | SCG2     | -       |
| hsa-miR-495 | -        | SCN11A   | SCN11A  |
| hsa-miR-495 | -        | SCN3A    | SCN3A   |
| hsa-miR-495 | SCN8A    | SCN8A    | -       |
| hsa-miR-495 | -        | SDAD1    | SDAD1   |
| hsa-miR-495 | -        | SEC14L4  | SEC14L4 |
| hsa-miR-495 | SEC23IP  | SEC23IP  | -       |
| hsa-miR-495 | SEL1L    | SEL1L    | -       |
| hsa-miR-495 | SENP6    | SENP6    | -       |
| hsa-miR-495 | SEPT11   | SEPT11   | -       |
| hsa-miR-495 | SET      | SET      | -       |
| hsa-miR-495 | SFPQ     | SFPQ     | -       |
| hsa-miR-495 | -        | SFRS5    | SFRS5   |
| hsa-miR-495 | SGCE     | SGCE     | -       |
| hsa-miR-495 | SGK1     | SGK1     | -       |
| hsa-miR-495 | -        | SH2D1B   | SH2D1B  |
| hsa-miR-495 | SHISA9   | SHISA9   | -       |
| hsa-miR-495 | SHMT2    | SHMT2    | -       |
| hsa-miR-495 | -        | SHPRH    | SHPRH   |
| hsa-miR-495 | -        | SHROOM3  | SHROOM3 |

|             |          |          |          |
|-------------|----------|----------|----------|
| hsa-miR-495 | -        | SIAE     | SIAE     |
| hsa-miR-495 | SIAH1    | SIAH1    | -        |
| hsa-miR-495 | SIK2     | SIK2     | -        |
| hsa-miR-495 | SIX4     | SIX4     | -        |
| hsa-miR-495 | -        | SKIL     | SKIL     |
| hsa-miR-495 | SLC12A2  | SLC12A2  | -        |
| hsa-miR-495 | SLC14A1  | SLC14A1  | -        |
| hsa-miR-495 | -        | SLC16A1  | SLC16A1  |
| hsa-miR-495 | SLC22A5  | SLC22A5  | -        |
| hsa-miR-495 | SLC25A26 | SLC25A26 | -        |
| hsa-miR-495 | SLC26A2  | SLC26A2  | -        |
| hsa-miR-495 | SLC26A7  | SLC26A7  | -        |
| hsa-miR-495 | SLC2A1   | SLC2A1   | -        |
| hsa-miR-495 | -        | SLC2A4RG | SLC2A4RG |
| hsa-miR-495 | -        | SLC30A1  | SLC30A1  |
| hsa-miR-495 | SLC35B4  | SLC35B4  | -        |
| hsa-miR-495 | -        | SLC35E2  | SLC35E2  |
| hsa-miR-495 | -        | SLC35F2  | SLC35F2  |
| hsa-miR-495 | SLC37A1  | SLC37A1  | -        |
| hsa-miR-495 | -        | SLC39A14 | SLC39A14 |
| hsa-miR-495 | -        | SLC41A3  | SLC41A3  |
| hsa-miR-495 | SLC44A1  | SLC44A1  | -        |
| hsa-miR-495 | SLC6A15  | SLC6A15  | -        |
| hsa-miR-495 | SLC7A14  | SLC7A14  | -        |
| hsa-miR-495 | SLC8A1   | SLC8A1   | -        |
| hsa-miR-495 | SLIT1    | SLIT1    | -        |
| hsa-miR-495 | -        | SLITRK2  | SLITRK2  |
| hsa-miR-495 | SLITRK4  | SLITRK4  | -        |
| hsa-miR-495 | SLMO2    | SLMO2    | -        |
| hsa-miR-495 | -        | SLTM     | SLTM     |
| hsa-miR-495 | SMAD9    | SMAD9    | -        |
| hsa-miR-495 | -        | SMCR7    | SMCR7    |
| hsa-miR-495 | -        | SMNDC1   | SMNDC1   |
| hsa-miR-495 | -        | SMYD3    | SMYD3    |
| hsa-miR-495 | SMYD4    | SMYD4    | -        |
| hsa-miR-495 | SNCA     | SNCA     | -        |
| hsa-miR-495 | -        | SNRPE    | SNRPE    |
| hsa-miR-495 | SNRPF    | SNRPF    | -        |
| hsa-miR-495 | SNRPG    | SNRPG    | -        |
| hsa-miR-495 | -        | SNTA1    | SNTA1    |
| hsa-miR-495 | SNX22    | SNX22    | -        |
| hsa-miR-495 | SNX9     | SNX9     | -        |
| hsa-miR-495 | -        | SOCS6    | SOCS6    |
| hsa-miR-495 | -        | SOHLH2   | SOHLH2   |
| hsa-miR-495 | SORCS1   | SORCS1   | -        |
| hsa-miR-495 | SOS1     | SOS1     | -        |
| hsa-miR-495 | SOX1     | SOX1     | -        |
| hsa-miR-495 | SOX13    | SOX13    | -        |
| hsa-miR-495 | SOX5     | SOX5     | -        |
| hsa-miR-495 | SOX9     | SOX9     | -        |
| hsa-miR-495 | SP1      | SP1      | -        |

|             |         |         |         |
|-------------|---------|---------|---------|
| hsa-miR-495 | SP2     | SP2     | -       |
| hsa-miR-495 | SP3     | SP3     | -       |
| hsa-miR-495 | SP5     | SP5     | -       |
| hsa-miR-495 | -       | SPA17   | SPA17   |
| hsa-miR-495 | SPARC   | SPARC   | -       |
| hsa-miR-495 | SPAST   | SPAST   | -       |
| hsa-miR-495 | -       | SPC25   | SPC25   |
| hsa-miR-495 | -       | SPHK1   | SPHK1   |
| hsa-miR-495 | SPPL3   | SPPL3   | -       |
| hsa-miR-495 | -       | SPSB4   | SPSB4   |
| hsa-miR-495 | SPTBN1  | SPTBN1  | -       |
| hsa-miR-495 | -       | SRBD1   | SRBD1   |
| hsa-miR-495 | SRGAP1  | SRGAP1  | -       |
| hsa-miR-495 | -       | SRP14   | SRP14   |
| hsa-miR-495 | SRRM1   | SRRM1   | -       |
| hsa-miR-495 | -       | SS18L1  | SS18L1  |
| hsa-miR-495 | -       | SSFA2   | SSFA2   |
| hsa-miR-495 | SSX2IP  | SSX2IP  | -       |
| hsa-miR-495 | ST8SIA2 | ST8SIA2 | -       |
| hsa-miR-495 | STAG2   | STAG2   | -       |
| hsa-miR-495 | STAT1   | STAT1   | -       |
| hsa-miR-495 | -       | STK17A  | STK17A  |
| hsa-miR-495 | -       | STK25   | STK25   |
| hsa-miR-495 | STK38L  | STK38L  | -       |
| hsa-miR-495 | -       | STK4    | STK4    |
| hsa-miR-495 | STRN    | STRN    | -       |
| hsa-miR-495 | -       | STT3A   | STT3A   |
| hsa-miR-495 | -       | STX3    | STX3    |
| hsa-miR-495 | STX7    | STX7    | -       |
| hsa-miR-495 | -       | STYK1   | STYK1   |
| hsa-miR-495 | SUDS3   | SUDS3   | -       |
| hsa-miR-495 | -       | SULT2A1 | SULT2A1 |
| hsa-miR-495 | SVEP1   | SVEP1   | -       |
| hsa-miR-495 | SYT6    | SYT6    | -       |
| hsa-miR-495 | TAB2    | TAB2    | -       |
| hsa-miR-495 | TACSTD2 | TACSTD2 | -       |
| hsa-miR-495 | TANC2   | TANC2   | -       |
| hsa-miR-495 | TARDBP  | TARDBP  | -       |
| hsa-miR-495 | -       | TBP     | TBP     |
| hsa-miR-495 | TCF4    | TCF4    | -       |
| hsa-miR-495 | -       | TDRD1   | TDRD1   |
| hsa-miR-495 | TEX261  | TEX261  | -       |
| hsa-miR-495 | TFAP4   | TFAP4   | -       |
| hsa-miR-495 | -       | TFB2M   | TFB2M   |
| hsa-miR-495 | -       | TFDP1   | TFDP1   |
| hsa-miR-495 | TGFB2   | TGFB2   | -       |
| hsa-miR-495 | TGFBR3  | TGFBR3  | -       |
| hsa-miR-495 | -       | THAP11  | THAP11  |
| hsa-miR-495 | -       | THAP9   | THAP9   |
| hsa-miR-495 | THBS2   | THBS2   | -       |
| hsa-miR-495 | THRB    | THRB    | -       |



|             |          |          |          |
|-------------|----------|----------|----------|
| hsa-miR-495 | THSD7A   | THSD7A   | -        |
| hsa-miR-495 | TIMP2    | TIMP2    | -        |
| hsa-miR-495 | -        | TJP2     | TJP2     |
| hsa-miR-495 | -        | TKTL1    | TKTL1    |
| hsa-miR-495 | -        | TM6SF1   | TM6SF1   |
| hsa-miR-495 | TM9SF3   | TM9SF3   | -        |
| hsa-miR-495 | TMED9    | TMED9    | -        |
| hsa-miR-495 | TMEFF2   | TMEFF2   | -        |
| hsa-miR-495 | TMEM101  | TMEM101  | -        |
| hsa-miR-495 | TMEM128  | TMEM128  | -        |
| hsa-miR-495 | TMEM132C | TMEM132C | -        |
| hsa-miR-495 | -        | TMEM144  | TMEM144  |
| hsa-miR-495 | TMEM154  | TMEM154  | -        |
| hsa-miR-495 | -        | TMEM156  | TMEM156  |
| hsa-miR-495 | TMEM183A | TMEM183A | -        |
| hsa-miR-495 | TMEM183B | TMEM183B | -        |
| hsa-miR-495 | -        | TMEM185B | TMEM185B |
| hsa-miR-495 | -        | TMEM188  | TMEM188  |
| hsa-miR-495 | -        | TMEM19   | TMEM19   |
| hsa-miR-495 | TMEM39B  | TMEM39B  | -        |
| hsa-miR-495 | -        | TMEM51   | TMEM51   |
| hsa-miR-495 | -        | TMEM60   | TMEM60   |
| hsa-miR-495 | -        | TMEM64   | TMEM64   |
| hsa-miR-495 | -        | TMEM70   | TMEM70   |
| hsa-miR-495 | -        | TMPO     | TMPO     |
| hsa-miR-495 | TNFAIP8  | TNFAIP8  | -        |
| hsa-miR-495 | TNFRSF1B | TNFRSF1B | -        |
| hsa-miR-495 | TNFRSF21 | TNFRSF21 | -        |
| hsa-miR-495 | TNRC18   | TNRC18   | -        |
| hsa-miR-495 | TNRC6A   | TNRC6A   | -        |
| hsa-miR-495 | -        | TOR3A    | TOR3A    |
| hsa-miR-495 | TOX      | TOX      | -        |
| hsa-miR-495 | TPD52    | TPD52    | -        |
| hsa-miR-495 | -        | TPD52L3  | TPD52L3  |
| hsa-miR-495 | -        | TPST1    | TPST1    |
| hsa-miR-495 | -        | TRAF5    | TRAF5    |
| hsa-miR-495 | TRAF7    | TRAF7    | -        |
| hsa-miR-495 | TRAPPC10 | TRAPPC10 | -        |
| hsa-miR-495 | -        | TRDN     | TRDN     |
| hsa-miR-495 | TRIM37   | TRIM37   | -        |
| hsa-miR-495 | -        | TRPC1    | TRPC1    |
| hsa-miR-495 | TSC22D3  | TSC22D3  | -        |
| hsa-miR-495 | TSLP     | TSLP     | -        |
| hsa-miR-495 | TTC21B   | TTC21B   | -        |
| hsa-miR-495 | -        | TTC24    | TTC24    |
| hsa-miR-495 | -        | TTC28    | TTC28    |
| hsa-miR-495 | -        | TTC6     | TTC6     |
| hsa-miR-495 | -        | TTC8     | TTC8     |
| hsa-miR-495 | -        | TTC9B    | TTC9B    |
| hsa-miR-495 | TLL11    | TLL11    | -        |
| hsa-miR-495 | TTPAL    | TTPAL    | -        |

|             |         |          |          |
|-------------|---------|----------|----------|
| hsa-miR-495 | TUBB    | TUBB     | -        |
| hsa-miR-495 | TUBGCP3 | TUBGCP3  | -        |
| hsa-miR-495 | TWF1    | TWF1     | -        |
| hsa-miR-495 | -       | TXNDC5   | TXNDC5   |
| hsa-miR-495 | -       | TXNL4A   | TXNL4A   |
| hsa-miR-495 | -       | UAP1     | UAP1     |
| hsa-miR-495 | UBE2E1  | UBE2E1   | -        |
| hsa-miR-495 | UBE2N   | UBE2N    | -        |
| hsa-miR-495 | UBE2Q1  | UBE2Q1   | -        |
| hsa-miR-495 | -       | UBE3A    | UBE3A    |
| hsa-miR-495 | UBN1    | UBN1     | -        |
| hsa-miR-495 | -       | UIMC1    | UIMC1    |
| hsa-miR-495 | UNC13C  | UNC13C   | -        |
| hsa-miR-495 | -       | UNC5C    | UNC5C    |
| hsa-miR-495 | -       | UPB1     | UPB1     |
| hsa-miR-495 | -       | UPF3A    | UPF3A    |
| hsa-miR-495 | -       | UROD     | UROD     |
| hsa-miR-495 | USP27X  | USP27X   | -        |
| hsa-miR-495 | USP30   | USP30    | -        |
| hsa-miR-495 | USP32   | USP32    | -        |
| hsa-miR-495 | VAX1    | VAX1     | -        |
| hsa-miR-495 | -       | VCAM1    | VCAM1    |
| hsa-miR-495 | VCL     | VCL      | -        |
| hsa-miR-495 | VEZF1   | VEZF1    | -        |
| hsa-miR-495 | VGLL4   | VGLL4    | -        |
| hsa-miR-495 | VPS13D  | VPS13D   | -        |
| hsa-miR-495 | -       | WBP4     | WBP4     |
| hsa-miR-495 | -       | WDR59    | WDR59    |
| hsa-miR-495 | -       | WDR69    | WDR69    |
| hsa-miR-495 | WDTC1   | WDTC1    | -        |
| hsa-miR-495 | WHSC1   | WHSC1    | -        |
| hsa-miR-495 | WIPF1   | WIPF1    | -        |
| hsa-miR-495 | WIPI2   | WIPI2    | -        |
| hsa-miR-495 | WNK1    | WNK1     | -        |
| hsa-miR-495 | -       | WRB      | WRB      |
| hsa-miR-495 | -       | WWP1     | WWP1     |
| hsa-miR-495 | XIAP    | XIAP     | -        |
| hsa-miR-495 | -       | XRCC6    | XRCC6    |
| hsa-miR-495 | -       | YAP1     | YAP1     |
| hsa-miR-495 | YME1L1  | YME1L1   | -        |
| hsa-miR-495 | YPEL2   | YPEL2    | -        |
| hsa-miR-495 | YTHDC1  | YTHDC1   | -        |
| hsa-miR-495 | YTHDC2  | YTHDC2   | -        |
| hsa-miR-495 | YTHDF3  | YTHDF3   | -        |
| hsa-miR-495 | ZBTB47  | ZBTB47   | -        |
| hsa-miR-495 | -       | ZC3H12A  | ZC3H12A  |
| hsa-miR-495 | -       | ZC3HAV1L | ZC3HAV1L |
| hsa-miR-495 | ZCCHC14 | ZCCHC14  | -        |
| hsa-miR-495 | ZCCHC8  | ZCCHC8   | -        |
| hsa-miR-495 | -       | ZFAND2A  | ZFAND2A  |
| hsa-miR-495 | ZFAND3  | ZFAND3   | -        |

|              |         |         |         |
|--------------|---------|---------|---------|
| hsa-miR-495  | ZFAND5  | ZFAND5  | -       |
| hsa-miR-495  | ZFHX3   | ZFHX3   | -       |
| hsa-miR-495  | ZFHX4   | ZFHX4   | -       |
| hsa-miR-495  | ZFP161  | ZFP161  | -       |
| hsa-miR-495  | ZFP36L1 | ZFP36L1 | -       |
| hsa-miR-495  | ZFYVE9  | ZFYVE9  | -       |
| hsa-miR-495  | ZHX2    | ZHX2    | -       |
| hsa-miR-495  | -       | ZKSCAN3 | ZKSCAN3 |
| hsa-miR-495  | ZMAT1   | ZMAT1   | -       |
| hsa-miR-495  | ZMYM3   | ZMYM3   | -       |
| hsa-miR-495  | -       | ZMYM5   | ZMYM5   |
| hsa-miR-495  | ZNF148  | ZNF148  | -       |
| hsa-miR-495  | -       | ZNF16   | ZNF16   |
| hsa-miR-495  | -       | ZNF160  | ZNF160  |
| hsa-miR-495  | -       | ZNF177  | ZNF177  |
| hsa-miR-495  | -       | ZNF181  | ZNF181  |
| hsa-miR-495  | -       | ZNF22   | ZNF22   |
| hsa-miR-495  | -       | ZNF227  | ZNF227  |
| hsa-miR-495  | -       | ZNF252  | ZNF252  |
| hsa-miR-495  | -       | ZNF274  | ZNF274  |
| hsa-miR-495  | ZNF280B | ZNF280B | -       |
| hsa-miR-495  | ZNF280C | ZNF280C | -       |
| hsa-miR-495  | ZNF281  | ZNF281  | -       |
| hsa-miR-495  | ZNF319  | ZNF319  | -       |
| hsa-miR-495  | -       | ZNF345  | ZNF345  |
| hsa-miR-495  | ZNF451  | ZNF451  | -       |
| hsa-miR-495  | ZNF516  | ZNF516  | -       |
| hsa-miR-495  | ZNF518A | ZNF518A | -       |
| hsa-miR-495  | ZNF518B | ZNF518B | -       |
| hsa-miR-495  | ZNF532  | ZNF532  | -       |
| hsa-miR-495  | -       | ZNF599  | ZNF599  |
| hsa-miR-495  | ZNF609  | ZNF609  | -       |
| hsa-miR-495  | -       | ZNF691  | ZNF691  |
| hsa-miR-495  | ZNF697  | ZNF697  | -       |
| hsa-miR-495  | -       | ZNF704  | ZNF704  |
| hsa-miR-495  | ZNF831  | ZNF831  | -       |
| hsa-miR-495  | -       | ZNFX1   | ZNFX1   |
| hsa-miR-495  | ZRANB2  | ZRANB2  | -       |
| hsa-miR-495  | -       | ZRANB3  | ZRANB3  |
| hsa-miR-495  | ZSWIM6  | ZSWIM6  | -       |
| hsa-miR-513b | ABCA13  | ABCA13  | -       |
| hsa-miR-513b | ABCE1   | ABCE1   | -       |
| hsa-miR-513b | ABCG1   | ABCG1   | -       |
| hsa-miR-513b | ABHD12B | ABHD12B | -       |
| hsa-miR-513b | ACADM   | ACADM   | -       |
| hsa-miR-513b | ACADSB  | ACADSB  | -       |
| hsa-miR-513b | ACBD7   | ACBD7   | -       |
| hsa-miR-513b | ACER3   | ACER3   | -       |
| hsa-miR-513b | ACRC    | ACRC    | -       |
| hsa-miR-513b | ACSF2   | ACSF2   | -       |
| hsa-miR-513b | ACSL3   | ACSL3   | -       |

|              |          |          |   |
|--------------|----------|----------|---|
| hsa-miR-513b | ACSL4    | ACSL4    | - |
| hsa-miR-513b | ACSL6    | ACSL6    | - |
| hsa-miR-513b | ACTBL2   | ACTBL2   | - |
| hsa-miR-513b | ACTR3    | ACTR3    | - |
| hsa-miR-513b | ACVR2A   | ACVR2A   | - |
| hsa-miR-513b | ADAM19   | ADAM19   | - |
| hsa-miR-513b | ADAM9    | ADAM9    | - |
| hsa-miR-513b | ADAMDEC1 | ADAMDEC1 | - |
| hsa-miR-513b | ADAMTS19 | ADAMTS19 | - |
| hsa-miR-513b | ADAMTSL1 | ADAMTSL1 | - |
| hsa-miR-513b | ADAR     | ADAR     | - |
| hsa-miR-513b | ADAT2    | ADAT2    | - |
| hsa-miR-513b | ADCY10   | ADCY10   | - |
| hsa-miR-513b | ADCY6    | ADCY6    | - |
| hsa-miR-513b | ADCYAP1  | ADCYAP1  | - |
| hsa-miR-513b | ADH5     | ADH5     | - |
| hsa-miR-513b | ADH7     | ADH7     | - |
| hsa-miR-513b | ADNP     | ADNP     | - |
| hsa-miR-513b | ADO      | ADO      | - |
| hsa-miR-513b | ADRA2B   | ADRA2B   | - |
| hsa-miR-513b | AEBP2    | AEBP2    | - |
| hsa-miR-513b | AFF3     | AFF3     | - |
| hsa-miR-513b | AFF4     | AFF4     | - |
| hsa-miR-513b | AFMID    | AFMID    | - |
| hsa-miR-513b | AFP      | AFP      | - |
| hsa-miR-513b | AFTPH    | AFTPH    | - |
| hsa-miR-513b | AGFG1    | AGFG1    | - |
| hsa-miR-513b | AGPAT6   | AGPAT6   | - |
| hsa-miR-513b | AGT      | AGT      | - |
| hsa-miR-513b | AGTR2    | AGTR2    | - |
| hsa-miR-513b | AHCYL1   | AHCYL1   | - |
| hsa-miR-513b | AHI1     | AHI1     | - |
| hsa-miR-513b | AIFM1    | AIFM1    | - |
| hsa-miR-513b | AK3      | AK3      | - |
| hsa-miR-513b | AKAP10   | AKAP10   | - |
| hsa-miR-513b | AKAP13   | AKAP13   | - |
| hsa-miR-513b | AKAP6    | AKAP6    | - |
| hsa-miR-513b | AKAP9    | AKAP9    | - |
| hsa-miR-513b | AKD1     | AKD1     | - |
| hsa-miR-513b | AKNA     | AKNA     | - |
| hsa-miR-513b | ALCAM    | ALCAM    | - |
| hsa-miR-513b | ALDH3A2  | ALDH3A2  | - |
| hsa-miR-513b | ALDH3B2  | ALDH3B2  | - |
| hsa-miR-513b | ALDH5A1  | ALDH5A1  | - |
| hsa-miR-513b | ALDH9A1  | ALDH9A1  | - |
| hsa-miR-513b | ALG6     | ALG6     | - |
| hsa-miR-513b | ALG9     | ALG9     | - |
| hsa-miR-513b | ALPK1    | ALPK1    | - |
| hsa-miR-513b | AMD1     | AMD1     | - |
| hsa-miR-513b | AMOT     | AMOT     | - |
| hsa-miR-513b | AMOTL2   | AMOTL2   | - |

|              |          |          |   |
|--------------|----------|----------|---|
| hsa-miR-513b | AMPD3    | AMPD3    | - |
| hsa-miR-513b | AMZ1     | AMZ1     | - |
| hsa-miR-513b | ANAPC7   | ANAPC7   | - |
| hsa-miR-513b | ANGPT2   | ANGPT2   | - |
| hsa-miR-513b | ANKRD13C | ANKRD13C | - |
| hsa-miR-513b | ANKRD22  | ANKRD22  | - |
| hsa-miR-513b | ANKRD27  | ANKRD27  | - |
| hsa-miR-513b | ANKRD28  | ANKRD28  | - |
| hsa-miR-513b | ANKRD34C | ANKRD34C | - |
| hsa-miR-513b | ANKRD36  | ANKRD36  | - |
| hsa-miR-513b | ANKRD40  | ANKRD40  | - |
| hsa-miR-513b | ANKRD57  | ANKRD57  | - |
| hsa-miR-513b | ANKRD7   | ANKRD7   | - |
| hsa-miR-513b | ANKS1B   | ANKS1B   | - |
| hsa-miR-513b | ANKS6    | ANKS6    | - |
| hsa-miR-513b | ANP32E   | ANP32E   | - |
| hsa-miR-513b | ANXA5    | ANXA5    | - |
| hsa-miR-513b | AP2A2    | AP2A2    | - |
| hsa-miR-513b | AP4S1    | AP4S1    | - |
| hsa-miR-513b | APC      | APC      | - |
| hsa-miR-513b | API5     | API5     | - |
| hsa-miR-513b | APOL4    | APOL4    | - |
| hsa-miR-513b | APOOL    | APOOL    | - |
| hsa-miR-513b | APPBP2   | APPBP2   | - |
| hsa-miR-513b | APTX     | APTX     | - |
| hsa-miR-513b | AQP4     | AQP4     | - |
| hsa-miR-513b | ARF6     | ARF6     | - |
| hsa-miR-513b | ARFGAP3  | ARFGAP3  | - |
| hsa-miR-513b | ARFIP1   | ARFIP1   | - |
| hsa-miR-513b | ARGLU1   | ARGLU1   | - |
| hsa-miR-513b | ARHGAP10 | ARHGAP10 | - |
| hsa-miR-513b | ARHGAP15 | ARHGAP15 | - |
| hsa-miR-513b | ARHGAP18 | ARHGAP18 | - |
| hsa-miR-513b | ARHGAP42 | ARHGAP42 | - |
| hsa-miR-513b | ARHGEF35 | ARHGEF35 | - |
| hsa-miR-513b | ARID2    | ARID2    | - |
| hsa-miR-513b | ARID4A   | ARID4A   | - |
| hsa-miR-513b | ARID4B   | ARID4B   | - |
| hsa-miR-513b | ARL1     | ARL1     | - |
| hsa-miR-513b | ARL4D    | ARL4D    | - |
| hsa-miR-513b | ARL6     | ARL6     | - |
| hsa-miR-513b | ARL6IP1  | ARL6IP1  | - |
| hsa-miR-513b | ARMC1    | ARMC1    | - |
| hsa-miR-513b | ARSI     | ARSI     | - |
| hsa-miR-513b | ASCL1    | ASCL1    | - |
| hsa-miR-513b | ASH2L    | ASH2L    | - |
| hsa-miR-513b | ASPH     | ASPH     | - |
| hsa-miR-513b | ASXL1    | ASXL1    | - |
| hsa-miR-513b | ASXL2    | ASXL2    | - |
| hsa-miR-513b | ATAD2B   | ATAD2B   | - |
| hsa-miR-513b | ATG5     | ATG5     | - |

|              |          |          |   |
|--------------|----------|----------|---|
| hsa-miR-513b | ATG7     | ATG7     | - |
| hsa-miR-513b | ATOH7    | ATOH7    | - |
| hsa-miR-513b | ATP11B   | ATP11B   | - |
| hsa-miR-513b | ATP1B3   | ATP1B3   | - |
| hsa-miR-513b | ATP1B4   | ATP1B4   | - |
| hsa-miR-513b | ATP6V0B  | ATP6V0B  | - |
| hsa-miR-513b | ATP6V1B2 | ATP6V1B2 | - |
| hsa-miR-513b | ATP6V1C2 | ATP6V1C2 | - |
| hsa-miR-513b | ATP6V1G2 | ATP6V1G2 | - |
| hsa-miR-513b | ATP7A    | ATP7A    | - |
| hsa-miR-513b | ATP8A1   | ATP8A1   | - |
| hsa-miR-513b | ATXN1L   | ATXN1L   | - |
| hsa-miR-513b | AVPR1A   | AVPR1A   | - |
| hsa-miR-513b | B3GALNT1 | B3GALNT1 | - |
| hsa-miR-513b | B3GALNT2 | B3GALNT2 | - |
| hsa-miR-513b | BACH1    | BACH1    | - |
| hsa-miR-513b | BAG1     | BAG1     | - |
| hsa-miR-513b | BAG2     | BAG2     | - |
| hsa-miR-513b | BAK1     | BAK1     | - |
| hsa-miR-513b | BAZ1A    | BAZ1A    | - |
| hsa-miR-513b | BAZ2A    | BAZ2A    | - |
| hsa-miR-513b | BBS7     | BBS7     | - |
| hsa-miR-513b | BCAT1    | BCAT1    | - |
| hsa-miR-513b | BCL11B   | BCL11B   | - |
| hsa-miR-513b | BCL2L1   | BCL2L1   | - |
| hsa-miR-513b | BCL2L10  | BCL2L10  | - |
| hsa-miR-513b | BCO2     | BCO2     | - |
| hsa-miR-513b | BCORL1   | BCORL1   | - |
| hsa-miR-513b | BDNF     | BDNF     | - |
| hsa-miR-513b | BDP1     | BDP1     | - |
| hsa-miR-513b | BEND2    | BEND2    | - |
| hsa-miR-513b | BEND7    | BEND7    | - |
| hsa-miR-513b | BEX2     | BEX2     | - |
| hsa-miR-513b | BFAR     | BFAR     | - |
| hsa-miR-513b | BHLHB9   | BHLHB9   | - |
| hsa-miR-513b | BIRC5    | BIRC5    | - |
| hsa-miR-513b | BLCAP    | BLCAP    | - |
| hsa-miR-513b | BLOC1S2  | BLOC1S2  | - |
| hsa-miR-513b | BMF      | BMF      | - |
| hsa-miR-513b | BMPR1A   | BMPR1A   | - |
| hsa-miR-513b | BPIL2    | BPIL2    | - |
| hsa-miR-513b | BRCC3    | BRCC3    | - |
| hsa-miR-513b | BRWD1    | BRWD1    | - |
| hsa-miR-513b | BSN      | BSN      | - |
| hsa-miR-513b | BTBD11   | BTBD11   | - |
| hsa-miR-513b | BTBD7    | BTBD7    | - |
| hsa-miR-513b | BTLA     | BTLA     | - |
| hsa-miR-513b | BTN2A1   | BTN2A1   | - |
| hsa-miR-513b | BTN2A2   | BTN2A2   | - |
| hsa-miR-513b | BUB1B    | BUB1B    | - |
| hsa-miR-513b | BZW1     | BZW1     | - |

|              |           |           |   |
|--------------|-----------|-----------|---|
| hsa-miR-513b | C10orf107 | C10orf107 | - |
| hsa-miR-513b | C10orf122 | C10orf122 | - |
| hsa-miR-513b | C10orf18  | C10orf18  | - |
| hsa-miR-513b | C10orf26  | C10orf26  | - |
| hsa-miR-513b | C11orf30  | C11orf30  | - |
| hsa-miR-513b | C11orf54  | C11orf54  | - |
| hsa-miR-513b | C11orf87  | C11orf87  | - |
| hsa-miR-513b | C12orf35  | C12orf35  | - |
| hsa-miR-513b | C12orf42  | C12orf42  | - |
| hsa-miR-513b | C12orf51  | C12orf51  | - |
| hsa-miR-513b | C12orf76  | C12orf76  | - |
| hsa-miR-513b | C13orf36  | C13orf36  | - |
| hsa-miR-513b | C14orf159 | C14orf159 | - |
| hsa-miR-513b | C15orf52  | C15orf52  | - |
| hsa-miR-513b | C15orf54  | C15orf54  | - |
| hsa-miR-513b | C16orf53  | C16orf53  | - |
| hsa-miR-513b | C16orf70  | C16orf70  | - |
| hsa-miR-513b | C17orf39  | C17orf39  | - |
| hsa-miR-513b | C17orf57  | C17orf57  | - |
| hsa-miR-513b | C17orf75  | C17orf75  | - |
| hsa-miR-513b | C18orf32  | C18orf32  | - |
| hsa-miR-513b | C18orf54  | C18orf54  | - |
| hsa-miR-513b | C19orf2   | C19orf2   | - |
| hsa-miR-513b | C1GALT1C1 | C1GALT1C1 | - |
| hsa-miR-513b | C1QL3     | C1QL3     | - |
| hsa-miR-513b | C1orf130  | C1orf130  | - |
| hsa-miR-513b | C1orf173  | C1orf173  | - |
| hsa-miR-513b | C1orf174  | C1orf174  | - |
| hsa-miR-513b | C1orf190  | C1orf190  | - |
| hsa-miR-513b | C1orf52   | C1orf52   | - |
| hsa-miR-513b | C1orf96   | C1orf96   | - |
| hsa-miR-513b | C20orf202 | C20orf202 | - |
| hsa-miR-513b | C21orf62  | C21orf62  | - |
| hsa-miR-513b | C22orf36  | C22orf36  | - |
| hsa-miR-513b | C2orf15   | C2orf15   | - |
| hsa-miR-513b | C2orf3    | C2orf3    | - |
| hsa-miR-513b | C2orf56   | C2orf56   | - |
| hsa-miR-513b | C2orf69   | C2orf69   | - |
| hsa-miR-513b | C3orf58   | C3orf58   | - |
| hsa-miR-513b | C4BPA     | C4BPA     | - |
| hsa-miR-513b | C4orf27   | C4orf27   | - |
| hsa-miR-513b | C4orf33   | C4orf33   | - |
| hsa-miR-513b | C4orf40   | C4orf40   | - |
| hsa-miR-513b | C4orf43   | C4orf43   | - |
| hsa-miR-513b | C4orf46   | C4orf46   | - |
| hsa-miR-513b | C5orf22   | C5orf22   | - |
| hsa-miR-513b | C5orf28   | C5orf28   | - |
| hsa-miR-513b | C5orf32   | C5orf32   | - |
| hsa-miR-513b | C5orf41   | C5orf41   | - |
| hsa-miR-513b | C5orf42   | C5orf42   | - |
| hsa-miR-513b | C6orf146  | C6orf146  | - |

|              |          |          |   |
|--------------|----------|----------|---|
| hsa-miR-513b | C6orf162 | C6orf162 | - |
| hsa-miR-513b | C6orf170 | C6orf170 | - |
| hsa-miR-513b | C6orf222 | C6orf222 | - |
| hsa-miR-513b | C6orf97  | C6orf97  | - |
| hsa-miR-513b | C7orf23  | C7orf23  | - |
| hsa-miR-513b | C7orf31  | C7orf31  | - |
| hsa-miR-513b | C7orf60  | C7orf60  | - |
| hsa-miR-513b | C7orf64  | C7orf64  | - |
| hsa-miR-513b | C8orf34  | C8orf34  | - |
| hsa-miR-513b | C8orf45  | C8orf45  | - |
| hsa-miR-513b | C8orf46  | C8orf46  | - |
| hsa-miR-513b | C8orf73  | C8orf73  | - |
| hsa-miR-513b | C8orf74  | C8orf74  | - |
| hsa-miR-513b | C9orf125 | C9orf125 | - |
| hsa-miR-513b | C9orf152 | C9orf152 | - |
| hsa-miR-513b | C9orf78  | C9orf78  | - |
| hsa-miR-513b | CA5B     | CA5B     | - |
| hsa-miR-513b | CAB39L   | CAB39L   | - |
| hsa-miR-513b | CACNG3   | CACNG3   | - |
| hsa-miR-513b | CADM2    | CADM2    | - |
| hsa-miR-513b | CADPS2   | CADPS2   | - |
| hsa-miR-513b | CALCA    | CALCA    | - |
| hsa-miR-513b | CALCB    | CALCB    | - |
| hsa-miR-513b | CALCR    | CALCR    | - |
| hsa-miR-513b | CALCRL   | CALCRL   | - |
| hsa-miR-513b | CALD1    | CALD1    | - |
| hsa-miR-513b | CAMK2D   | CAMK2D   | - |
| hsa-miR-513b | CAMLG    | CAMLG    | - |
| hsa-miR-513b | CAMTA1   | CAMTA1   | - |
| hsa-miR-513b | CAP2     | CAP2     | - |
| hsa-miR-513b | CAPNS1   | CAPNS1   | - |
| hsa-miR-513b | CAPZA2   | CAPZA2   | - |
| hsa-miR-513b | CASP10   | CASP10   | - |
| hsa-miR-513b | CASP3    | CASP3    | - |
| hsa-miR-513b | CASQ1    | CASQ1    | - |
| hsa-miR-513b | CASS4    | CASS4    | - |
| hsa-miR-513b | CBFA2T2  | CBFA2T2  | - |
| hsa-miR-513b | CBFA2T3  | CBFA2T3  | - |
| hsa-miR-513b | CBLL1    | CBLL1    | - |
| hsa-miR-513b | CCDC112  | CCDC112  | - |
| hsa-miR-513b | CCDC130  | CCDC130  | - |
| hsa-miR-513b | CCDC15   | CCDC15   | - |
| hsa-miR-513b | CCDC25   | CCDC25   | - |
| hsa-miR-513b | CCDC28A  | CCDC28A  | - |
| hsa-miR-513b | CCDC34   | CCDC34   | - |
| hsa-miR-513b | CCDC36   | CCDC36   | - |
| hsa-miR-513b | CCDC68   | CCDC68   | - |
| hsa-miR-513b | CCDC91   | CCDC91   | - |
| hsa-miR-513b | CCL11    | CCL11    | - |
| hsa-miR-513b | CCNB1    | CCNB1    | - |
| hsa-miR-513b | CCND3    | CCND3    | - |



|              |          |          |   |
|--------------|----------|----------|---|
| hsa-miR-513b | CCNE2    | CCNE2    | - |
| hsa-miR-513b | CCNJL    | CCNJL    | - |
| hsa-miR-513b | CCNL2    | CCNL2    | - |
| hsa-miR-513b | CCNYL1   | CCNYL1   | - |
| hsa-miR-513b | CCPG1    | CCPG1    | - |
| hsa-miR-513b | CD101    | CD101    | - |
| hsa-miR-513b | CD163    | CD163    | - |
| hsa-miR-513b | CD200    | CD200    | - |
| hsa-miR-513b | CD247    | CD247    | - |
| hsa-miR-513b | CD274    | CD274    | - |
| hsa-miR-513b | CD36     | CD36     | - |
| hsa-miR-513b | CD86     | CD86     | - |
| hsa-miR-513b | CD8B     | CD8B     | - |
| hsa-miR-513b | CDC14A   | CDC14A   | - |
| hsa-miR-513b | CDC14B   | CDC14B   | - |
| hsa-miR-513b | CDC20B   | CDC20B   | - |
| hsa-miR-513b | CDC42BPB | CDC42BPB | - |
| hsa-miR-513b | CDC42SE2 | CDC42SE2 | - |
| hsa-miR-513b | CDC6     | CDC6     | - |
| hsa-miR-513b | CDH8     | CDH8     | - |
| hsa-miR-513b | CDK13    | CDK13    | - |
| hsa-miR-513b | CDK14    | CDK14    | - |
| hsa-miR-513b | CDK17    | CDK17    | - |
| hsa-miR-513b | CDK19    | CDK19    | - |
| hsa-miR-513b | CDKN1A   | CDKN1A   | - |
| hsa-miR-513b | CDO1     | CDO1     | - |
| hsa-miR-513b | CDON     | CDON     | - |
| hsa-miR-513b | CDV3     | CDV3     | - |
| hsa-miR-513b | CELF1    | CELF1    | - |
| hsa-miR-513b | CELF2    | CELF2    | - |
| hsa-miR-513b | CELF4    | CELF4    | - |
| hsa-miR-513b | CENPC1   | CENPC1   | - |
| hsa-miR-513b | CEP350   | CEP350   | - |
| hsa-miR-513b | CEP68    | CEP68    | - |
| hsa-miR-513b | CEP97    | CEP97    | - |
| hsa-miR-513b | CEPT1    | CEPT1    | - |
| hsa-miR-513b | CFH      | CFH      | - |
| hsa-miR-513b | CFHR1    | CFHR1    | - |
| hsa-miR-513b | CFHR2    | CFHR2    | - |
| hsa-miR-513b | CFLAR    | CFLAR    | - |
| hsa-miR-513b | CFTR     | CFTR     | - |
| hsa-miR-513b | CGGBP1   | CGGBP1   | - |
| hsa-miR-513b | CHAC2    | CHAC2    | - |
| hsa-miR-513b | CHCHD1   | CHCHD1   | - |
| hsa-miR-513b | CHCHD4   | CHCHD4   | - |
| hsa-miR-513b | CHD2     | CHD2     | - |
| hsa-miR-513b | CHEK1    | CHEK1    | - |
| hsa-miR-513b | CHIC1    | CHIC1    | - |
| hsa-miR-513b | CHM      | CHM      | - |
| hsa-miR-513b | CHMP5    | CHMP5    | - |
| hsa-miR-513b | CHN2     | CHN2     | - |

|              |          |          |   |
|--------------|----------|----------|---|
| hsa-miR-513b | CHRNA2   | CHRNA2   | - |
| hsa-miR-513b | CHST11   | CHST11   | - |
| hsa-miR-513b | CKAP4    | CKAP4    | - |
| hsa-miR-513b | CLASP2   | CLASP2   | - |
| hsa-miR-513b | CLDN16   | CLDN16   | - |
| hsa-miR-513b | CLEC12B  | CLEC12B  | - |
| hsa-miR-513b | CLEC4D   | CLEC4D   | - |
| hsa-miR-513b | CLIC6    | CLIC6    | - |
| hsa-miR-513b | CLIP4    | CLIP4    | - |
| hsa-miR-513b | CLK2     | CLK2     | - |
| hsa-miR-513b | CLSTN2   | CLSTN2   | - |
| hsa-miR-513b | CLU      | CLU      | - |
| hsa-miR-513b | CLUAP1   | CLUAP1   | - |
| hsa-miR-513b | CMPK1    | CMPK1    | - |
| hsa-miR-513b | CNGB3    | CNGB3    | - |
| hsa-miR-513b | CNIH     | CNIH     | - |
| hsa-miR-513b | CNNM3    | CNNM3    | - |
| hsa-miR-513b | CNOT4    | CNOT4    | - |
| hsa-miR-513b | CNOT6    | CNOT6    | - |
| hsa-miR-513b | CNOT7    | CNOT7    | - |
| hsa-miR-513b | CNRIP1   | CNRIP1   | - |
| hsa-miR-513b | CNTF     | CNTF     | - |
| hsa-miR-513b | CNTN4    | CNTN4    | - |
| hsa-miR-513b | CNTNAP3  | CNTNAP3  | - |
| hsa-miR-513b | CNTNAP3B | CNTNAP3B | - |
| hsa-miR-513b | COL12A1  | COL12A1  | - |
| hsa-miR-513b | COL19A1  | COL19A1  | - |
| hsa-miR-513b | COL1A1   | COL1A1   | - |
| hsa-miR-513b | COL1A2   | COL1A2   | - |
| hsa-miR-513b | COL4A3BP | COL4A3BP | - |
| hsa-miR-513b | COL4A5   | COL4A5   | - |
| hsa-miR-513b | COL5A2   | COL5A2   | - |
| hsa-miR-513b | COL8A2   | COL8A2   | - |
| hsa-miR-513b | COMMD8   | COMMD8   | - |
| hsa-miR-513b | COMMD9   | COMMD9   | - |
| hsa-miR-513b | CORO2A   | CORO2A   | - |
| hsa-miR-513b | COTL1    | COTL1    | - |
| hsa-miR-513b | COX11    | COX11    | - |
| hsa-miR-513b | COX6B2   | COX6B2   | - |
| hsa-miR-513b | CPEB3    | CPEB3    | - |
| hsa-miR-513b | CPEB4    | CPEB4    | - |
| hsa-miR-513b | CPN2     | CPN2     | - |
| hsa-miR-513b | CPNE8    | CPNE8    | - |
| hsa-miR-513b | CPPED1   | CPPED1   | - |
| hsa-miR-513b | CPS1     | CPS1     | - |
| hsa-miR-513b | CPSF2    | CPSF2    | - |
| hsa-miR-513b | CPSF6    | CPSF6    | - |
| hsa-miR-513b | CPSF7    | CPSF7    | - |
| hsa-miR-513b | CREB1    | CREB1    | - |
| hsa-miR-513b | CRIM1    | CRIM1    | - |
| hsa-miR-513b | CRISP1   | CRISP1   | - |

|              |            |            |   |
|--------------|------------|------------|---|
| hsa-miR-513b | CRISP3     | CRISP3     | - |
| hsa-miR-513b | CRKL       | CRKL       | - |
| hsa-miR-513b | CRMP1      | CRMP1      | - |
| hsa-miR-513b | CRNKL1     | CRNKL1     | - |
| hsa-miR-513b | CROT       | CROT       | - |
| hsa-miR-513b | CRTAP      | CRTAP      | - |
| hsa-miR-513b | CRTC3      | CRTC3      | - |
| hsa-miR-513b | CRYAB      | CRYAB      | - |
| hsa-miR-513b | CSGALNACT1 | CSGALNACT1 | - |
| hsa-miR-513b | CSK        | CSK        | - |
| hsa-miR-513b | CSNK1A1    | CSNK1A1    | - |
| hsa-miR-513b | CSNK1G3    | CSNK1G3    | - |
| hsa-miR-513b | CSTB       | CSTB       | - |
| hsa-miR-513b | CTBP2      | CTBP2      | - |
| hsa-miR-513b | CTH        | CTH        | - |
| hsa-miR-513b | CTNNBIP1   | CTNNBIP1   | - |
| hsa-miR-513b | CTNS       | CTNS       | - |
| hsa-miR-513b | CTR9       | CTR9       | - |
| hsa-miR-513b | CTSO       | CTSO       | - |
| hsa-miR-513b | CUL4A      | CUL4A      | - |
| hsa-miR-513b | CWC22      | CWC22      | - |
| hsa-miR-513b | CX3CL1     | CX3CL1     | - |
| hsa-miR-513b | CXADR      | CXADR      | - |
| hsa-miR-513b | CXCL12     | CXCL12     | - |
| hsa-miR-513b | CXCL16     | CXCL16     | - |
| hsa-miR-513b | CXCL5      | CXCL5      | - |
| hsa-miR-513b | CXCR4      | CXCR4      | - |
| hsa-miR-513b | CXorf1     | CXorf1     | - |
| hsa-miR-513b | CXorf23    | CXorf23    | - |
| hsa-miR-513b | CXorf58    | CXorf58    | - |
| hsa-miR-513b | CYB5R2     | CYB5R2     | - |
| hsa-miR-513b | CYFIP2     | CYFIP2     | - |
| hsa-miR-513b | CYP2C8     | CYP2C8     | - |
| hsa-miR-513b | CYP2S1     | CYP2S1     | - |
| hsa-miR-513b | CYP2U1     | CYP2U1     | - |
| hsa-miR-513b | CYP3A43    | CYP3A43    | - |
| hsa-miR-513b | CYP51A1    | CYP51A1    | - |
| hsa-miR-513b | CYP7A1     | CYP7A1     | - |
| hsa-miR-513b | CYorf15A   | CYorf15A   | - |
| hsa-miR-513b | DACH2      | DACH2      | - |
| hsa-miR-513b | DAZAP1     | DAZAP1     | - |
| hsa-miR-513b | DAZAP2     | DAZAP2     | - |
| hsa-miR-513b | DBF4       | DBF4       | - |
| hsa-miR-513b | DCAF12L1   | DCAF12L1   | - |
| hsa-miR-513b | DCBLD2     | DCBLD2     | - |
| hsa-miR-513b | DCP1A      | DCP1A      | - |
| hsa-miR-513b | DCP2       | DCP2       | - |
| hsa-miR-513b | DDX18      | DDX18      | - |
| hsa-miR-513b | DDX25      | DDX25      | - |
| hsa-miR-513b | DDX31      | DDX31      | - |
| hsa-miR-513b | DDX46      | DDX46      | - |

|              |         |         |   |
|--------------|---------|---------|---|
| hsa-miR-513b | DDX51   | DDX51   | - |
| hsa-miR-513b | DEFB132 | DEFB132 | - |
| hsa-miR-513b | DEGS1   | DEGS1   | - |
| hsa-miR-513b | DENND2C | DENND2C | - |
| hsa-miR-513b | DENND4C | DENND4C | - |
| hsa-miR-513b | DEPDC5  | DEPDC5  | - |
| hsa-miR-513b | DERA    | DERA    | - |
| hsa-miR-513b | DHRS12  | DHRS12  | - |
| hsa-miR-513b | DHRS9   | DHRS9   | - |
| hsa-miR-513b | DHX15   | DHX15   | - |
| hsa-miR-513b | DHX30   | DHX30   | - |
| hsa-miR-513b | DHX33   | DHX33   | - |
| hsa-miR-513b | DHX57   | DHX57   | - |
| hsa-miR-513b | DIO2    | DIO2    | - |
| hsa-miR-513b | DIP2C   | DIP2C   | - |
| hsa-miR-513b | DIRC2   | DIRC2   | - |
| hsa-miR-513b | DISC1   | DISC1   | - |
| hsa-miR-513b | DLAT    | DLAT    | - |
| hsa-miR-513b | DLC1    | DLC1    | - |
| hsa-miR-513b | DLG2    | DLG2    | - |
| hsa-miR-513b | DLG3    | DLG3    | - |
| hsa-miR-513b | DLGAP1  | DLGAP1  | - |
| hsa-miR-513b | DLX1    | DLX1    | - |
| hsa-miR-513b | DMD     | DMD     | - |
| hsa-miR-513b | DMRT3   | DMRT3   | - |
| hsa-miR-513b | DMRTC1  | DMRTC1  | - |
| hsa-miR-513b | DNA2    | DNA2    | - |
| hsa-miR-513b | DNAH5   | DNAH5   | - |
| hsa-miR-513b | DNAJA2  | DNAJA2  | - |
| hsa-miR-513b | DNAJC13 | DNAJC13 | - |
| hsa-miR-513b | DNAJC24 | DNAJC24 | - |
| hsa-miR-513b | DNAJC7  | DNAJC7  | - |
| hsa-miR-513b | DNAJC8  | DNAJC8  | - |
| hsa-miR-513b | DNER    | DNER    | - |
| hsa-miR-513b | DNM1L   | DNM1L   | - |
| hsa-miR-513b | DOCK4   | DOCK4   | - |
| hsa-miR-513b | DOCK9   | DOCK9   | - |
| hsa-miR-513b | DOK5    | DOK5    | - |
| hsa-miR-513b | DOK6    | DOK6    | - |
| hsa-miR-513b | DPCR1   | DPCR1   | - |
| hsa-miR-513b | DPH1    | DPH1    | - |
| hsa-miR-513b | DPH3    | DPH3    | - |
| hsa-miR-513b | DPY19L4 | DPY19L4 | - |
| hsa-miR-513b | DPYD    | DPYD    | - |
| hsa-miR-513b | DQX1    | DQX1    | - |
| hsa-miR-513b | DR1     | DR1     | - |
| hsa-miR-513b | DST     | DST     | - |
| hsa-miR-513b | DTNA    | DTNA    | - |
| hsa-miR-513b | DTWD1   | DTWD1   | - |
| hsa-miR-513b | DUSP10  | DUSP10  | - |
| hsa-miR-513b | DUSP11  | DUSP11  | - |

|              |          |          |   |
|--------------|----------|----------|---|
| hsa-miR-513b | DUSP16   | DUSP16   | - |
| hsa-miR-513b | DUSP19   | DUSP19   | - |
| hsa-miR-513b | DUSP5    | DUSP5    | - |
| hsa-miR-513b | DUXA     | DUXA     | - |
| hsa-miR-513b | DYNC1H1  | DYNC1H1  | - |
| hsa-miR-513b | DYNC1LI2 | DYNC1LI2 | - |
| hsa-miR-513b | DYX1C1   | DYX1C1   | - |
| hsa-miR-513b | DZIP3    | DZIP3    | - |
| hsa-miR-513b | E2F2     | E2F2     | - |
| hsa-miR-513b | E2F5     | E2F5     | - |
| hsa-miR-513b | E2F6     | E2F6     | - |
| hsa-miR-513b | EBF3     | EBF3     | - |
| hsa-miR-513b | EDAR     | EDAR     | - |
| hsa-miR-513b | EDN3     | EDN3     | - |
| hsa-miR-513b | EEA1     | EEA1     | - |
| hsa-miR-513b | EFCAB1   | EFCAB1   | - |
| hsa-miR-513b | EFCAB2   | EFCAB2   | - |
| hsa-miR-513b | EFEMP1   | EFEMP1   | - |
| hsa-miR-513b | EFHD1    | EFHD1    | - |
| hsa-miR-513b | EFNA5    | EFNA5    | - |
| hsa-miR-513b | EGLN1    | EGLN1    | - |
| hsa-miR-513b | EGR2     | EGR2     | - |
| hsa-miR-513b | EGR3     | EGR3     | - |
| hsa-miR-513b | EHBP1    | EHBP1    | - |
| hsa-miR-513b | EHHADH   | EHHADH   | - |
| hsa-miR-513b | EI24     | EI24     | - |
| hsa-miR-513b | EIF1AX   | EIF1AX   | - |
| hsa-miR-513b | EIF1B    | EIF1B    | - |
| hsa-miR-513b | EIF2AK3  | EIF2AK3  | - |
| hsa-miR-513b | EIF2S1   | EIF2S1   | - |
| hsa-miR-513b | EIF2S3   | EIF2S3   | - |
| hsa-miR-513b | EIF4A2   | EIF4A2   | - |
| hsa-miR-513b | EIF4H    | EIF4H    | - |
| hsa-miR-513b | ELAVL1   | ELAVL1   | - |
| hsa-miR-513b | ELK4     | ELK4     | - |
| hsa-miR-513b | ELOVL2   | ELOVL2   | - |
| hsa-miR-513b | ELOVL4   | ELOVL4   | - |
| hsa-miR-513b | ELTD1    | ELTD1    | - |
| hsa-miR-513b | EMID1    | EMID1    | - |
| hsa-miR-513b | EML4     | EML4     | - |
| hsa-miR-513b | EN2      | EN2      | - |
| hsa-miR-513b | ENOPH1   | ENOPH1   | - |
| hsa-miR-513b | ENPP1    | ENPP1    | - |
| hsa-miR-513b | ENPP4    | ENPP4    | - |
| hsa-miR-513b | EPB41    | EPB41    | - |
| hsa-miR-513b | EPB41L4A | EPB41L4A | - |
| hsa-miR-513b | EPB41L4B | EPB41L4B | - |
| hsa-miR-513b | EPHA3    | EPHA3    | - |
| hsa-miR-513b | EPM2A    | EPM2A    | - |
| hsa-miR-513b | EPM2AIP1 | EPM2AIP1 | - |
| hsa-miR-513b | EPT1     | EPT1     | - |

|              |          |          |   |
|--------------|----------|----------|---|
| hsa-miR-513b | ERC2     | ERC2     | - |
| hsa-miR-513b | ERLIN2   | ERLIN2   | - |
| hsa-miR-513b | ERMAP    | ERMAP    | - |
| hsa-miR-513b | ERMN     | ERMN     | - |
| hsa-miR-513b | ERO1L    | ERO1L    | - |
| hsa-miR-513b | ERO1LB   | ERO1LB   | - |
| hsa-miR-513b | ETNK1    | ETNK1    | - |
| hsa-miR-513b | ETV6     | ETV6     | - |
| hsa-miR-513b | EWSR1    | EWSR1    | - |
| hsa-miR-513b | EXOC1    | EXOC1    | - |
| hsa-miR-513b | EYA1     | EYA1     | - |
| hsa-miR-513b | EZH1     | EZH1     | - |
| hsa-miR-513b | F11R     | F11R     | - |
| hsa-miR-513b | FA2H     | FA2H     | - |
| hsa-miR-513b | FADD     | FADD     | - |
| hsa-miR-513b | FAF2     | FAF2     | - |
| hsa-miR-513b | FAM107B  | FAM107B  | - |
| hsa-miR-513b | FAM108B1 | FAM108B1 | - |
| hsa-miR-513b | FAM114A2 | FAM114A2 | - |
| hsa-miR-513b | FAM120C  | FAM120C  | - |
| hsa-miR-513b | FAM122B  | FAM122B  | - |
| hsa-miR-513b | FAM122C  | FAM122C  | - |
| hsa-miR-513b | FAM123B  | FAM123B  | - |
| hsa-miR-513b | FAM124B  | FAM124B  | - |
| hsa-miR-513b | FAM125B  | FAM125B  | - |
| hsa-miR-513b | FAM131B  | FAM131B  | - |
| hsa-miR-513b | FAM134B  | FAM134B  | - |
| hsa-miR-513b | FAM134C  | FAM134C  | - |
| hsa-miR-513b | FAM135A  | FAM135A  | - |
| hsa-miR-513b | FAM169A  | FAM169A  | - |
| hsa-miR-513b | FAM172A  | FAM172A  | - |
| hsa-miR-513b | FAM179B  | FAM179B  | - |
| hsa-miR-513b | FAM185A  | FAM185A  | - |
| hsa-miR-513b | FAM190A  | FAM190A  | - |
| hsa-miR-513b | FAM199X  | FAM199X  | - |
| hsa-miR-513b | FAM19A1  | FAM19A1  | - |
| hsa-miR-513b | FAM3C    | FAM3C    | - |
| hsa-miR-513b | FAM43A   | FAM43A   | - |
| hsa-miR-513b | FAM46A   | FAM46A   | - |
| hsa-miR-513b | FAM46C   | FAM46C   | - |
| hsa-miR-513b | FAM46D   | FAM46D   | - |
| hsa-miR-513b | FAM53C   | FAM53C   | - |
| hsa-miR-513b | FAM54B   | FAM54B   | - |
| hsa-miR-513b | FAM57A   | FAM57A   | - |
| hsa-miR-513b | FAM5B    | FAM5B    | - |
| hsa-miR-513b | FAM83C   | FAM83C   | - |
| hsa-miR-513b | FAM84B   | FAM84B   | - |
| hsa-miR-513b | FAM98A   | FAM98A   | - |
| hsa-miR-513b | FANCF    | FANCF    | - |
| hsa-miR-513b | FAR1     | FAR1     | - |
| hsa-miR-513b | FAS      | FAS      | - |

|              |          |          |   |
|--------------|----------|----------|---|
| hsa-miR-513b | FASLG    | FASLG    | - |
| hsa-miR-513b | FBLN7    | FBLN7    | - |
| hsa-miR-513b | FBN1     | FBN1     | - |
| hsa-miR-513b | FBN2     | FBN2     | - |
| hsa-miR-513b | FBXL14   | FBXL14   | - |
| hsa-miR-513b | FBXL17   | FBXL17   | - |
| hsa-miR-513b | FBXL7    | FBXL7    | - |
| hsa-miR-513b | FBXO11   | FBXO11   | - |
| hsa-miR-513b | FBXO30   | FBXO30   | - |
| hsa-miR-513b | FBXO45   | FBXO45   | - |
| hsa-miR-513b | FBXW2    | FBXW2    | - |
| hsa-miR-513b | FCHSD2   | FCHSD2   | - |
| hsa-miR-513b | FEM1C    | FEM1C    | - |
| hsa-miR-513b | FFAR2    | FFAR2    | - |
| hsa-miR-513b | FGD4     | FGD4     | - |
| hsa-miR-513b | FGD5     | FGD5     | - |
| hsa-miR-513b | FGF1     | FGF1     | - |
| hsa-miR-513b | FGF5     | FGF5     | - |
| hsa-miR-513b | FGF7     | FGF7     | - |
| hsa-miR-513b | FGF9     | FGF9     | - |
| hsa-miR-513b | FGFR1OP2 | FGFR1OP2 | - |
| hsa-miR-513b | FHL2     | FHL2     | - |
| hsa-miR-513b | FIGF     | FIGF     | - |
| hsa-miR-513b | FKBP7    | FKBP7    | - |
| hsa-miR-513b | FLCN     | FLCN     | - |
| hsa-miR-513b | FLI1     | FLI1     | - |
| hsa-miR-513b | FLJ36031 | FLJ36031 | - |
| hsa-miR-513b | FLJ44635 | FLJ44635 | - |
| hsa-miR-513b | FLRT1    | FLRT1    | - |
| hsa-miR-513b | FMN2     | FMN2     | - |
| hsa-miR-513b | FMO2     | FMO2     | - |
| hsa-miR-513b | FMR1     | FMR1     | - |
| hsa-miR-513b | FNBP1    | FNBP1    | - |
| hsa-miR-513b | FNBP1L   | FNBP1L   | - |
| hsa-miR-513b | FNBP4    | FNBP4    | - |
| hsa-miR-513b | FNDC3A   | FNDC3A   | - |
| hsa-miR-513b | FNDC5    | FNDC5    | - |
| hsa-miR-513b | FOXP1    | FOXP1    | - |
| hsa-miR-513b | FOXP2    | FOXP2    | - |
| hsa-miR-513b | FOXR2    | FOXR2    | - |
| hsa-miR-513b | FOXRED2  | FOXRED2  | - |
| hsa-miR-513b | FRAS1    | FRAS1    | - |
| hsa-miR-513b | FRMD4B   | FRMD4B   | - |
| hsa-miR-513b | FRMD8    | FRMD8    | - |
| hsa-miR-513b | FSTL5    | FSTL5    | - |
| hsa-miR-513b | FTO      | FTO      | - |
| hsa-miR-513b | FUNDC2   | FUNDC2   | - |
| hsa-miR-513b | FUT1     | FUT1     | - |
| hsa-miR-513b | FXC1     | FXC1     | - |
| hsa-miR-513b | FZD3     | FZD3     | - |
| hsa-miR-513b | GABPA    | GABPA    | - |

|              |          |          |   |
|--------------|----------|----------|---|
| hsa-miR-513b | GABPB1   | GABPB1   | - |
| hsa-miR-513b | GABRB3   | GABRB3   | - |
| hsa-miR-513b | GABRE    | GABRE    | - |
| hsa-miR-513b | GABRG1   | GABRG1   | - |
| hsa-miR-513b | GAGE1    | GAGE1    | - |
| hsa-miR-513b | GALNT4   | GALNT4   | - |
| hsa-miR-513b | GALNT7   | GALNT7   | - |
| hsa-miR-513b | GALR1    | GALR1    | - |
| hsa-miR-513b | GANAB    | GANAB    | - |
| hsa-miR-513b | GAPVD1   | GAPVD1   | - |
| hsa-miR-513b | GATA2    | GATA2    | - |
| hsa-miR-513b | GBA3     | GBA3     | - |
| hsa-miR-513b | GBAS     | GBAS     | - |
| hsa-miR-513b | GBP4     | GBP4     | - |
| hsa-miR-513b | GCH1     | GCH1     | - |
| hsa-miR-513b | GCK      | GCK      | - |
| hsa-miR-513b | GCM1     | GCM1     | - |
| hsa-miR-513b | GCNT2    | GCNT2    | - |
| hsa-miR-513b | GCOM1    | GCOM1    | - |
| hsa-miR-513b | GIMAP4   | GIMAP4   | - |
| hsa-miR-513b | GIMAP7   | GIMAP7   | - |
| hsa-miR-513b | GIP      | GIP      | - |
| hsa-miR-513b | GK       | GK       | - |
| hsa-miR-513b | GK2      | GK2      | - |
| hsa-miR-513b | GLB1L3   | GLB1L3   | - |
| hsa-miR-513b | GLCE     | GLCE     | - |
| hsa-miR-513b | GLDN     | GLDN     | - |
| hsa-miR-513b | GLE1     | GLE1     | - |
| hsa-miR-513b | GLG1     | GLG1     | - |
| hsa-miR-513b | GLIPR1L2 | GLIPR1L2 | - |
| hsa-miR-513b | GLIS3    | GLIS3    | - |
| hsa-miR-513b | GLP1R    | GLP1R    | - |
| hsa-miR-513b | GLS      | GLS      | - |
| hsa-miR-513b | GLYR1    | GLYR1    | - |
| hsa-miR-513b | GMFB     | GMFB     | - |
| hsa-miR-513b | GNAQ     | GNAQ     | - |
| hsa-miR-513b | GNB1     | GNB1     | - |
| hsa-miR-513b | GNB4     | GNB4     | - |
| hsa-miR-513b | GNL1     | GNL1     | - |
| hsa-miR-513b | GNL3     | GNL3     | - |
| hsa-miR-513b | GNPNAT1  | GNPNAT1  | - |
| hsa-miR-513b | GNRHR    | GNRHR    | - |
| hsa-miR-513b | GNS      | GNS      | - |
| hsa-miR-513b | GOLGA4   | GOLGA4   | - |
| hsa-miR-513b | GOLGA8B  | GOLGA8B  | - |
| hsa-miR-513b | GOLM1    | GOLM1    | - |
| hsa-miR-513b | GOLPH3   | GOLPH3   | - |
| hsa-miR-513b | GOLPH3L  | GOLPH3L  | - |
| hsa-miR-513b | GOPC     | GOPC     | - |
| hsa-miR-513b | GORAB    | GORAB    | - |
| hsa-miR-513b | GPATCH4  | GPATCH4  | - |



|              |          |          |   |
|--------------|----------|----------|---|
| hsa-miR-513b | GPBP1    | GPBP1    | - |
| hsa-miR-513b | GPM6A    | GPM6A    | - |
| hsa-miR-513b | GPN1     | GPN1     | - |
| hsa-miR-513b | GPR1     | GPR1     | - |
| hsa-miR-513b | GPR112   | GPR112   | - |
| hsa-miR-513b | GPR113   | GPR113   | - |
| hsa-miR-513b | GPR115   | GPR115   | - |
| hsa-miR-513b | GPR116   | GPR116   | - |
| hsa-miR-513b | GPR123   | GPR123   | - |
| hsa-miR-513b | GPR126   | GPR126   | - |
| hsa-miR-513b | GPR133   | GPR133   | - |
| hsa-miR-513b | GPR18    | GPR18    | - |
| hsa-miR-513b | GPR82    | GPR82    | - |
| hsa-miR-513b | GPR85    | GPR85    | - |
| hsa-miR-513b | GPSM2    | GPSM2    | - |
| hsa-miR-513b | GPX8     | GPX8     | - |
| hsa-miR-513b | GRID1    | GRID1    | - |
| hsa-miR-513b | GRIN2A   | GRIN2A   | - |
| hsa-miR-513b | GRIN2B   | GRIN2B   | - |
| hsa-miR-513b | GRIN3A   | GRIN3A   | - |
| hsa-miR-513b | GRINL1A  | GRINL1A  | - |
| hsa-miR-513b | GRIP1    | GRIP1    | - |
| hsa-miR-513b | GRM3     | GRM3     | - |
| hsa-miR-513b | GRPR     | GRPR     | - |
| hsa-miR-513b | GRTP1    | GRTP1    | - |
| hsa-miR-513b | GSK3B    | GSK3B    | - |
| hsa-miR-513b | GSPT1    | GSPT1    | - |
| hsa-miR-513b | GSPT2    | GSPT2    | - |
| hsa-miR-513b | GSTCD    | GSTCD    | - |
| hsa-miR-513b | GSTM4    | GSTM4    | - |
| hsa-miR-513b | GTF2A1L  | GTF2A1L  | - |
| hsa-miR-513b | GTF3C2   | GTF3C2   | - |
| hsa-miR-513b | GUCA1C   | GUCA1C   | - |
| hsa-miR-513b | GXYLT2   | GXYLT2   | - |
| hsa-miR-513b | GZF1     | GZF1     | - |
| hsa-miR-513b | H2AFJ    | H2AFJ    | - |
| hsa-miR-513b | HAND2    | HAND2    | - |
| hsa-miR-513b | HAP1     | HAP1     | - |
| hsa-miR-513b | HAS3     | HAS3     | - |
| hsa-miR-513b | HAT1     | HAT1     | - |
| hsa-miR-513b | HAUS2    | HAUS2    | - |
| hsa-miR-513b | HAUS5    | HAUS5    | - |
| hsa-miR-513b | HBS1L    | HBS1L    | - |
| hsa-miR-513b | HDAC4    | HDAC4    | - |
| hsa-miR-513b | HDAC9    | HDAC9    | - |
| hsa-miR-513b | HDC      | HDC      | - |
| hsa-miR-513b | HECTD2   | HECTD2   | - |
| hsa-miR-513b | HEPACAM2 | HEPACAM2 | - |
| hsa-miR-513b | HERC3    | HERC3    | - |
| hsa-miR-513b | HERC4    | HERC4    | - |
| hsa-miR-513b | HGSNAT   | HGSNAT   | - |

|              |           |           |   |
|--------------|-----------|-----------|---|
| hsa-miR-513b | HHLA3     | HHLA3     | - |
| hsa-miR-513b | HIGD1A    | HIGD1A    | - |
| hsa-miR-513b | HIP1      | HIP1      | - |
| hsa-miR-513b | HIST1H2AH | HIST1H2AH | - |
| hsa-miR-513b | HIST1H3D  | HIST1H3D  | - |
| hsa-miR-513b | HJURP     | HJURP     | - |
| hsa-miR-513b | HLF       | HLF       | - |
| hsa-miR-513b | HLTF      | HLTF      | - |
| hsa-miR-513b | HM13      | HM13      | - |
| hsa-miR-513b | HMG20A    | HMG20A    | - |
| hsa-miR-513b | HMGA2     | HMGA2     | - |
| hsa-miR-513b | HMGB3     | HMGB3     | - |
| hsa-miR-513b | HMGCLL1   | HMGCLL1   | - |
| hsa-miR-513b | HMGN2     | HMGN2     | - |
| hsa-miR-513b | HMGN4     | HMGN4     | - |
| hsa-miR-513b | HN1L      | HN1L      | - |
| hsa-miR-513b | HNF4G     | HNF4G     | - |
| hsa-miR-513b | HNRNPA1   | HNRNPA1   | - |
| hsa-miR-513b | HNRNPA1L2 | HNRNPA1L2 | - |
| hsa-miR-513b | HNRNPA3   | HNRNPA3   | - |
| hsa-miR-513b | HNRNPC    | HNRNPC    | - |
| hsa-miR-513b | HNRNPF    | HNRNPF    | - |
| hsa-miR-513b | HNRNPH1   | HNRNPH1   | - |
| hsa-miR-513b | HNRNPH2   | HNRNPH2   | - |
| hsa-miR-513b | HNRNPU    | HNRNPU    | - |
| hsa-miR-513b | HNRNPUL2  | HNRNPUL2  | - |
| hsa-miR-513b | HOMER2    | HOMER2    | - |
| hsa-miR-513b | HOOK1     | HOOK1     | - |
| hsa-miR-513b | HOXA10    | HOXA10    | - |
| hsa-miR-513b | HOXB4     | HOXB4     | - |
| hsa-miR-513b | HOXB9     | HOXB9     | - |
| hsa-miR-513b | HPCAL4    | HPCAL4    | - |
| hsa-miR-513b | HPSE2     | HPSE2     | - |
| hsa-miR-513b | HRASLS5   | HRASLS5   | - |
| hsa-miR-513b | HRCT1     | HRCT1     | - |
| hsa-miR-513b | HRG       | HRG       | - |
| hsa-miR-513b | HS3ST5    | HS3ST5    | - |
| hsa-miR-513b | HSD17B12  | HSD17B12  | - |
| hsa-miR-513b | HSD17B8   | HSD17B8   | - |
| hsa-miR-513b | HSPH1     | HSPH1     | - |
| hsa-miR-513b | HTR4      | HTR4      | - |
| hsa-miR-513b | HUS1      | HUS1      | - |
| hsa-miR-513b | ICA1      | ICA1      | - |
| hsa-miR-513b | ICA1L     | ICA1L     | - |
| hsa-miR-513b | ID2       | ID2       | - |
| hsa-miR-513b | ID4       | ID4       | - |
| hsa-miR-513b | IER3IP1   | IER3IP1   | - |
| hsa-miR-513b | IER5L     | IER5L     | - |
| hsa-miR-513b | IFI16     | IFI16     | - |
| hsa-miR-513b | IFI44     | IFI44     | - |
| hsa-miR-513b | IFNA8     | IFNA8     | - |

|              |          |          |   |
|--------------|----------|----------|---|
| hsa-miR-513b | IGDCC3   | IGDCC3   | - |
| hsa-miR-513b | IKBKB    | IKBKB    | - |
| hsa-miR-513b | IKBKE    | IKBKE    | - |
| hsa-miR-513b | IL12B    | IL12B    | - |
| hsa-miR-513b | IL31     | IL31     | - |
| hsa-miR-513b | IL4R     | IL4R     | - |
| hsa-miR-513b | IL5RA    | IL5RA    | - |
| hsa-miR-513b | ILF2     | ILF2     | - |
| hsa-miR-513b | ILF3     | ILF3     | - |
| hsa-miR-513b | ILVBL    | ILVBL    | - |
| hsa-miR-513b | IMMT     | IMMT     | - |
| hsa-miR-513b | IMPACT   | IMPACT   | - |
| hsa-miR-513b | INADL    | INADL    | - |
| hsa-miR-513b | ING3     | ING3     | - |
| hsa-miR-513b | INHBA    | INHBA    | - |
| hsa-miR-513b | INPP5F   | INPP5F   | - |
| hsa-miR-513b | INSM1    | INSM1    | - |
| hsa-miR-513b | IQCK     | IQCK     | - |
| hsa-miR-513b | IRF2     | IRF2     | - |
| hsa-miR-513b | IRF5     | IRF5     | - |
| hsa-miR-513b | IRF8     | IRF8     | - |
| hsa-miR-513b | IRS1     | IRS1     | - |
| hsa-miR-513b | ISOC1    | ISOC1    | - |
| hsa-miR-513b | ITGA4    | ITGA4    | - |
| hsa-miR-513b | ITGAV    | ITGAV    | - |
| hsa-miR-513b | ITGB3    | ITGB3    | - |
| hsa-miR-513b | ITPKB    | ITPKB    | - |
| hsa-miR-513b | ITPR1    | ITPR1    | - |
| hsa-miR-513b | IVNS1ABP | IVNS1ABP | - |
| hsa-miR-513b | JHDM1D   | JHDM1D   | - |
| hsa-miR-513b | JMJD1C   | JMJD1C   | - |
| hsa-miR-513b | JOSD1    | JOSD1    | - |
| hsa-miR-513b | JPH4     | JPH4     | - |
| hsa-miR-513b | KBTBD11  | KBTBD11  | - |
| hsa-miR-513b | KBTBD8   | KBTBD8   | - |
| hsa-miR-513b | KCNC2    | KCNC2    | - |
| hsa-miR-513b | KCND2    | KCND2    | - |
| hsa-miR-513b | KCNE1    | KCNE1    | - |
| hsa-miR-513b | KCNH8    | KCNH8    | - |
| hsa-miR-513b | KCNJ13   | KCNJ13   | - |
| hsa-miR-513b | KCNK10   | KCNK10   | - |
| hsa-miR-513b | KCNMA1   | KCNMA1   | - |
| hsa-miR-513b | KCNT1    | KCNT1    | - |
| hsa-miR-513b | KCTD15   | KCTD15   | - |
| hsa-miR-513b | KDEL3    | KDEL3    | - |
| hsa-miR-513b | KDM3A    | KDM3A    | - |
| hsa-miR-513b | KDM4C    | KDM4C    | - |
| hsa-miR-513b | KDM4D    | KDM4D    | - |
| hsa-miR-513b | KDM5B    | KDM5B    | - |
| hsa-miR-513b | KDM6A    | KDM6A    | - |
| hsa-miR-513b | KDR      | KDR      | - |

|              |           |           |   |
|--------------|-----------|-----------|---|
| hsa-miR-513b | KHDRBS3   | KHDRBS3   | - |
| hsa-miR-513b | KIAA0090  | KIAA0090  | - |
| hsa-miR-513b | KIAA0101  | KIAA0101  | - |
| hsa-miR-513b | KIAA0141  | KIAA0141  | - |
| hsa-miR-513b | KIAA0146  | KIAA0146  | - |
| hsa-miR-513b | KIAA0317  | KIAA0317  | - |
| hsa-miR-513b | KIAA1024  | KIAA1024  | - |
| hsa-miR-513b | KIAA1109  | KIAA1109  | - |
| hsa-miR-513b | KIAA1211  | KIAA1211  | - |
| hsa-miR-513b | KIAA1467  | KIAA1467  | - |
| hsa-miR-513b | KIAA1468  | KIAA1468  | - |
| hsa-miR-513b | KIAA1486  | KIAA1486  | - |
| hsa-miR-513b | KIAA1804  | KIAA1804  | - |
| hsa-miR-513b | KIAA2022  | KIAA2022  | - |
| hsa-miR-513b | KIAA2026  | KIAA2026  | - |
| hsa-miR-513b | KIDINS220 | KIDINS220 | - |
| hsa-miR-513b | KIF26A    | KIF26A    | - |
| hsa-miR-513b | KIF2A     | KIF2A     | - |
| hsa-miR-513b | KIF5C     | KIF5C     | - |
| hsa-miR-513b | KISS1R    | KISS1R    | - |
| hsa-miR-513b | KL        | KL        | - |
| hsa-miR-513b | KLF10     | KLF10     | - |
| hsa-miR-513b | KLF2      | KLF2      | - |
| hsa-miR-513b | KLF3      | KLF3      | - |
| hsa-miR-513b | KLF4      | KLF4      | - |
| hsa-miR-513b | KLHL2     | KLHL2     | - |
| hsa-miR-513b | KLHL24    | KLHL24    | - |
| hsa-miR-513b | KLHL28    | KLHL28    | - |
| hsa-miR-513b | KPNA3     | KPNA3     | - |
| hsa-miR-513b | KPNA4     | KPNA4     | - |
| hsa-miR-513b | KRAS      | KRAS      | - |
| hsa-miR-513b | KRIT1     | KRIT1     | - |
| hsa-miR-513b | KRT77     | KRT77     | - |
| hsa-miR-513b | KRT85     | KRT85     | - |
| hsa-miR-513b | KRTAP1-5  | KRTAP1-5  | - |
| hsa-miR-513b | KRTAP11-1 | KRTAP11-1 | - |
| hsa-miR-513b | KRTAP4-5  | KRTAP4-5  | - |
| hsa-miR-513b | KRTAP8-1  | KRTAP8-1  | - |
| hsa-miR-513b | KRTAP9-9  | KRTAP9-9  | - |
| hsa-miR-513b | LAIR2     | LAIR2     | - |
| hsa-miR-513b | LAMP2     | LAMP2     | - |
| hsa-miR-513b | LANCL1    | LANCL1    | - |
| hsa-miR-513b | LANCL2    | LANCL2    | - |
| hsa-miR-513b | LBR       | LBR       | - |
| hsa-miR-513b | LCE2A     | LCE2A     | - |
| hsa-miR-513b | LCE5A     | LCE5A     | - |
| hsa-miR-513b | LCLAT1    | LCLAT1    | - |
| hsa-miR-513b | LCMT2     | LCMT2     | - |
| hsa-miR-513b | LCOR      | LCOR      | - |
| hsa-miR-513b | LDHA      | LDHA      | - |
| hsa-miR-513b | LEKR1     | LEKR1     | - |

|              |           |           |   |
|--------------|-----------|-----------|---|
| hsa-miR-513b | LEMD3     | LEMD3     | - |
| hsa-miR-513b | LEPROTL1  | LEPROTL1  | - |
| hsa-miR-513b | LGALS8    | LGALS8    | - |
| hsa-miR-513b | LHFPL2    | LHFPL2    | - |
| hsa-miR-513b | LHX8      | LHX8      | - |
| hsa-miR-513b | LIN28B    | LIN28B    | - |
| hsa-miR-513b | LIPH      | LIPH      | - |
| hsa-miR-513b | LIPI      | LIPI      | - |
| hsa-miR-513b | LMCD1     | LMCD1     | - |
| hsa-miR-513b | LMLN      | LMLN      | - |
| hsa-miR-513b | LMO7      | LMO7      | - |
| hsa-miR-513b | LMTK2     | LMTK2     | - |
| hsa-miR-513b | LOC221710 | LOC221710 | - |
| hsa-miR-513b | LOC284385 | LOC284385 | - |
| hsa-miR-513b | LOC554223 | LOC554223 | - |
| hsa-miR-513b | LOX       | LOX       | - |
| hsa-miR-513b | LPAR5     | LPAR5     | - |
| hsa-miR-513b | LPHN2     | LPHN2     | - |
| hsa-miR-513b | LPIN2     | LPIN2     | - |
| hsa-miR-513b | LPP       | LPP       | - |
| hsa-miR-513b | LRBA      | LRBA      | - |
| hsa-miR-513b | LRCH1     | LRCH1     | - |
| hsa-miR-513b | LRCH2     | LRCH2     | - |
| hsa-miR-513b | LRGUK     | LRGUK     | - |
| hsa-miR-513b | LRIG2     | LRIG2     | - |
| hsa-miR-513b | LRP6      | LRP6      | - |
| hsa-miR-513b | LRRC15    | LRRC15    | - |
| hsa-miR-513b | LRRC2     | LRRC2     | - |
| hsa-miR-513b | LRRC4     | LRRC4     | - |
| hsa-miR-513b | LRRC8B    | LRRC8B    | - |
| hsa-miR-513b | LRRCC1    | LRRCC1    | - |
| hsa-miR-513b | LRTOMT    | LRTOMT    | - |
| hsa-miR-513b | LSM6      | LSM6      | - |
| hsa-miR-513b | LTB4R     | LTB4R     | - |
| hsa-miR-513b | LTB4R2    | LTB4R2    | - |
| hsa-miR-513b | LTBP2     | LTBP2     | - |
| hsa-miR-513b | LUM       | LUM       | - |
| hsa-miR-513b | LY75      | LY75      | - |
| hsa-miR-513b | LYPD3     | LYPD3     | - |
| hsa-miR-513b | LYZL4     | LYZL4     | - |
| hsa-miR-513b | MACF1     | MACF1     | - |
| hsa-miR-513b | MACROD2   | MACROD2   | - |
| hsa-miR-513b | MAD1L1    | MAD1L1    | - |
| hsa-miR-513b | MAF       | MAF       | - |
| hsa-miR-513b | MAFG      | MAFG      | - |
| hsa-miR-513b | MAGEA12   | MAGEA12   | - |
| hsa-miR-513b | MAGEA3    | MAGEA3    | - |
| hsa-miR-513b | MAGEA4    | MAGEA4    | - |
| hsa-miR-513b | MAGEA6    | MAGEA6    | - |
| hsa-miR-513b | MAGEB4    | MAGEB4    | - |
| hsa-miR-513b | MAGI1     | MAGI1     | - |

|              |          |          |   |
|--------------|----------|----------|---|
| hsa-miR-513b | MAGT1    | MAGT1    | - |
| hsa-miR-513b | MAL2     | MAL2     | - |
| hsa-miR-513b | MAOA     | MAOA     | - |
| hsa-miR-513b | MAP2K1   | MAP2K1   | - |
| hsa-miR-513b | MAP4K4   | MAP4K4   | - |
| hsa-miR-513b | MAPKAP1  | MAPKAP1  | - |
| hsa-miR-513b | MARCH3   | MARCH3   | - |
| hsa-miR-513b | MARCH5   | MARCH5   | - |
| hsa-miR-513b | MARCH6   | MARCH6   | - |
| hsa-miR-513b | MARCKSL1 | MARCKSL1 | - |
| hsa-miR-513b | MARK1    | MARK1    | - |
| hsa-miR-513b | MARK3    | MARK3    | - |
| hsa-miR-513b | MAT2A    | MAT2A    | - |
| hsa-miR-513b | MATN2    | MATN2    | - |
| hsa-miR-513b | MATN3    | MATN3    | - |
| hsa-miR-513b | MATR3    | MATR3    | - |
| hsa-miR-513b | MAZ      | MAZ      | - |
| hsa-miR-513b | MBLAC2   | MBLAC2   | - |
| hsa-miR-513b | MBNL2    | MBNL2    | - |
| hsa-miR-513b | MBOAT1   | MBOAT1   | - |
| hsa-miR-513b | MBP      | MBP      | - |
| hsa-miR-513b | MCFD2    | MCFD2    | - |
| hsa-miR-513b | MCHR2    | MCHR2    | - |
| hsa-miR-513b | MCM4     | MCM4     | - |
| hsa-miR-513b | MCM8     | MCM8     | - |
| hsa-miR-513b | MCTP2    | MCTP2    | - |
| hsa-miR-513b | MDGA2    | MDGA2    | - |
| hsa-miR-513b | MDH1     | MDH1     | - |
| hsa-miR-513b | MDM2     | MDM2     | - |
| hsa-miR-513b | MED1     | MED1     | - |
| hsa-miR-513b | MED13L   | MED13L   | - |
| hsa-miR-513b | MED14    | MED14    | - |
| hsa-miR-513b | MED26    | MED26    | - |
| hsa-miR-513b | MED6     | MED6     | - |
| hsa-miR-513b | MED9     | MED9     | - |
| hsa-miR-513b | MEIG1    | MEIG1    | - |
| hsa-miR-513b | MELK     | MELK     | - |
| hsa-miR-513b | MESP1    | MESP1    | - |
| hsa-miR-513b | METAP1   | METAP1   | - |
| hsa-miR-513b | METTL1   | METTL1   | - |
| hsa-miR-513b | MFAP1    | MFAP1    | - |
| hsa-miR-513b | MFNG     | MFNG     | - |
| hsa-miR-513b | MFSD6    | MFSD6    | - |
| hsa-miR-513b | MGAT4A   | MGAT4A   | - |
| hsa-miR-513b | MGEA5    | MGEA5    | - |
| hsa-miR-513b | MICAL3   | MICAL3   | - |
| hsa-miR-513b | MINA     | MINA     | - |
| hsa-miR-513b | MINPP1   | MINPP1   | - |
| hsa-miR-513b | MITF     | MITF     | - |
| hsa-miR-513b | MKI67    | MKI67    | - |
| hsa-miR-513b | MKRN2    | MKRN2    | - |

|              |         |         |   |
|--------------|---------|---------|---|
| hsa-miR-513b | MKRN3   | MKRN3   | - |
| hsa-miR-513b | MLL5    | MLL5    | - |
| hsa-miR-513b | MLLT1   | MLLT1   | - |
| hsa-miR-513b | MLLT10  | MLLT10  | - |
| hsa-miR-513b | MMAA    | MMAA    | - |
| hsa-miR-513b | MMRN2   | MMRN2   | - |
| hsa-miR-513b | MNAT1   | MNAT1   | - |
| hsa-miR-513b | MND1    | MND1    | - |
| hsa-miR-513b | MOAP1   | MOAP1   | - |
| hsa-miR-513b | MOBKL2A | MOBKL2A | - |
| hsa-miR-513b | MOBKL3  | MOBKL3  | - |
| hsa-miR-513b | MORC3   | MORC3   | - |
| hsa-miR-513b | MOSPD1  | MOSPD1  | - |
| hsa-miR-513b | MPPED2  | MPPED2  | - |
| hsa-miR-513b | MPZL2   | MPZL2   | - |
| hsa-miR-513b | MRAP2   | MRAP2   | - |
| hsa-miR-513b | MRGPRX2 | MRGPRX2 | - |
| hsa-miR-513b | MRPL1   | MRPL1   | - |
| hsa-miR-513b | MRPL19  | MRPL19  | - |
| hsa-miR-513b | MRPL3   | MRPL3   | - |
| hsa-miR-513b | MRPL43  | MRPL43  | - |
| hsa-miR-513b | MRPL45  | MRPL45  | - |
| hsa-miR-513b | MRPS14  | MRPS14  | - |
| hsa-miR-513b | MRPS18A | MRPS18A | - |
| hsa-miR-513b | MRPS27  | MRPS27  | - |
| hsa-miR-513b | MRPS28  | MRPS28  | - |
| hsa-miR-513b | MS4A2   | MS4A2   | - |
| hsa-miR-513b | MSL3    | MSL3    | - |
| hsa-miR-513b | MSN     | MSN     | - |
| hsa-miR-513b | MSRB3   | MSRB3   | - |
| hsa-miR-513b | MTAP    | MTAP    | - |
| hsa-miR-513b | MTERFD2 | MTERFD2 | - |
| hsa-miR-513b | MTF2    | MTF2    | - |
| hsa-miR-513b | MTFMT   | MTFMT   | - |
| hsa-miR-513b | MTHFD2L | MTHFD2L | - |
| hsa-miR-513b | MTM1    | MTM1    | - |
| hsa-miR-513b | MTMR12  | MTMR12  | - |
| hsa-miR-513b | MTMR2   | MTMR2   | - |
| hsa-miR-513b | MTMR4   | MTMR4   | - |
| hsa-miR-513b | MTMR6   | MTMR6   | - |
| hsa-miR-513b | MTRR    | MTRR    | - |
| hsa-miR-513b | MTUS1   | MTUS1   | - |
| hsa-miR-513b | MTUS2   | MTUS2   | - |
| hsa-miR-513b | MUS81   | MUS81   | - |
| hsa-miR-513b | MXD1    | MXD1    | - |
| hsa-miR-513b | MYCBP2  | MYCBP2  | - |
| hsa-miR-513b | MYCN    | MYCN    | - |
| hsa-miR-513b | MYO18A  | MYO18A  | - |
| hsa-miR-513b | MYO6    | MYO6    | - |
| hsa-miR-513b | MYOC    | MYOC    | - |
| hsa-miR-513b | MYT1L   | MYT1L   | - |

|              |           |           |   |
|--------------|-----------|-----------|---|
| hsa-miR-513b | N6AMT1    | N6AMT1    | - |
| hsa-miR-513b | NAA15     | NAA15     | - |
| hsa-miR-513b | NAAA      | NAAA      | - |
| hsa-miR-513b | NAF1      | NAF1      | - |
| hsa-miR-513b | NAP1L5    | NAP1L5    | - |
| hsa-miR-513b | NARG2     | NARG2     | - |
| hsa-miR-513b | NAV2      | NAV2      | - |
| hsa-miR-513b | NAV3      | NAV3      | - |
| hsa-miR-513b | NBR1      | NBR1      | - |
| hsa-miR-513b | NCKAP5    | NCKAP5    | - |
| hsa-miR-513b | NCOA1     | NCOA1     | - |
| hsa-miR-513b | NCOA2     | NCOA2     | - |
| hsa-miR-513b | NDFIP2    | NDFIP2    | - |
| hsa-miR-513b | NDN       | NDN       | - |
| hsa-miR-513b | NDUFB5    | NDUFB5    | - |
| hsa-miR-513b | NDUFC2    | NDUFC2    | - |
| hsa-miR-513b | NECAB2    | NECAB2    | - |
| hsa-miR-513b | NEDD9     | NEDD9     | - |
| hsa-miR-513b | NEFL      | NEFL      | - |
| hsa-miR-513b | NEGR1     | NEGR1     | - |
| hsa-miR-513b | NEK7      | NEK7      | - |
| hsa-miR-513b | NETO1     | NETO1     | - |
| hsa-miR-513b | NEU1      | NEU1      | - |
| hsa-miR-513b | NEU3      | NEU3      | - |
| hsa-miR-513b | NEUROG2   | NEUROG2   | - |
| hsa-miR-513b | NFIB      | NFIB      | - |
| hsa-miR-513b | NFYA      | NFYA      | - |
| hsa-miR-513b | NHLH2     | NHLH2     | - |
| hsa-miR-513b | NHLRC2    | NHLRC2    | - |
| hsa-miR-513b | NHP2L1    | NHP2L1    | - |
| hsa-miR-513b | NHS       | NHS       | - |
| hsa-miR-513b | NID2      | NID2      | - |
| hsa-miR-513b | NIN       | NIN       | - |
| hsa-miR-513b | NIPSNAP3A | NIPSNAP3A | - |
| hsa-miR-513b | NKAIN3    | NKAIN3    | - |
| hsa-miR-513b | NKIRAS1   | NKIRAS1   | - |
| hsa-miR-513b | NKRF      | NKRF      | - |
| hsa-miR-513b | NKX3-2    | NKX3-2    | - |
| hsa-miR-513b | NLGN4X    | NLGN4X    | - |
| hsa-miR-513b | NLGN4Y    | NLGN4Y    | - |
| hsa-miR-513b | NLRP9     | NLRP9     | - |
| hsa-miR-513b | NOC3L     | NOC3L     | - |
| hsa-miR-513b | NOL10     | NOL10     | - |
| hsa-miR-513b | NOL12     | NOL12     | - |
| hsa-miR-513b | NOTCH1    | NOTCH1    | - |
| hsa-miR-513b | NOTCH3    | NOTCH3    | - |
| hsa-miR-513b | NOVA1     | NOVA1     | - |
| hsa-miR-513b | NOX3      | NOX3      | - |
| hsa-miR-513b | NPAT      | NPAT      | - |
| hsa-miR-513b | NPC1L1    | NPC1L1    | - |
| hsa-miR-513b | NPEPPS    | NPEPPS    | - |



|              |          |          |   |
|--------------|----------|----------|---|
| hsa-miR-513b | NPL      | NPL      | - |
| hsa-miR-513b | NPNT     | NPNT     | - |
| hsa-miR-513b | NPY1R    | NPY1R    | - |
| hsa-miR-513b | NPY2R    | NPY2R    | - |
| hsa-miR-513b | NR1D2    | NR1D2    | - |
| hsa-miR-513b | NR1I2    | NR1I2    | - |
| hsa-miR-513b | NR2E1    | NR2E1    | - |
| hsa-miR-513b | NRAS     | NRAS     | - |
| hsa-miR-513b | NRCAM    | NRCAM    | - |
| hsa-miR-513b | NRK      | NRK      | - |
| hsa-miR-513b | NRP1     | NRP1     | - |
| hsa-miR-513b | NRXN3    | NRXN3    | - |
| hsa-miR-513b | NSD1     | NSD1     | - |
| hsa-miR-513b | NSFL1C   | NSFL1C   | - |
| hsa-miR-513b | NT5DC3   | NT5DC3   | - |
| hsa-miR-513b | NTRK2    | NTRK2    | - |
| hsa-miR-513b | NUBPL    | NUBPL    | - |
| hsa-miR-513b | NUCKS1   | NUCKS1   | - |
| hsa-miR-513b | NUDT10   | NUDT10   | - |
| hsa-miR-513b | NUDT12   | NUDT12   | - |
| hsa-miR-513b | NUDT15   | NUDT15   | - |
| hsa-miR-513b | NUP50    | NUP50    | - |
| hsa-miR-513b | NUP54    | NUP54    | - |
| hsa-miR-513b | NUP62    | NUP62    | - |
| hsa-miR-513b | NUP98    | NUP98    | - |
| hsa-miR-513b | NUPL1    | NUPL1    | - |
| hsa-miR-513b | NUS1     | NUS1     | - |
| hsa-miR-513b | NWD1     | NWD1     | - |
| hsa-miR-513b | NXPH3    | NXPH3    | - |
| hsa-miR-513b | NXT2     | NXT2     | - |
| hsa-miR-513b | OCIAD1   | OCIAD1   | - |
| hsa-miR-513b | ODZ3     | ODZ3     | - |
| hsa-miR-513b | OIP5     | OIP5     | - |
| hsa-miR-513b | OLA1     | OLA1     | - |
| hsa-miR-513b | OLFML1   | OLFML1   | - |
| hsa-miR-513b | OPHN1    | OPHN1    | - |
| hsa-miR-513b | OR51E2   | OR51E2   | - |
| hsa-miR-513b | ORMDL1   | ORMDL1   | - |
| hsa-miR-513b | OVCA2    | OVCA2    | - |
| hsa-miR-513b | OVOL2    | OVOL2    | - |
| hsa-miR-513b | P2RY1    | P2RY1    | - |
| hsa-miR-513b | PACRG    | PACRG    | - |
| hsa-miR-513b | PACRGL   | PACRGL   | - |
| hsa-miR-513b | PACSIN1  | PACSIN1  | - |
| hsa-miR-513b | PADI2    | PADI2    | - |
| hsa-miR-513b | PADI3    | PADI3    | - |
| hsa-miR-513b | PADI4    | PADI4    | - |
| hsa-miR-513b | PAFAH1B2 | PAFAH1B2 | - |
| hsa-miR-513b | PAFAH2   | PAFAH2   | - |
| hsa-miR-513b | PAIP2    | PAIP2    | - |
| hsa-miR-513b | PAK1     | PAK1     | - |

|              |         |         |   |
|--------------|---------|---------|---|
| hsa-miR-513b | PAK6    | PAK6    | - |
| hsa-miR-513b | PALMD   | PALMD   | - |
| hsa-miR-513b | PAPD7   | PAPD7   | - |
| hsa-miR-513b | PAPOLA  | PAPOLA  | - |
| hsa-miR-513b | PAPPA2  | PAPPA2  | - |
| hsa-miR-513b | PAQR3   | PAQR3   | - |
| hsa-miR-513b | PAQR5   | PAQR5   | - |
| hsa-miR-513b | PARG    | PARG    | - |
| hsa-miR-513b | PARL    | PARL    | - |
| hsa-miR-513b | PARN    | PARN    | - |
| hsa-miR-513b | PARP14  | PARP14  | - |
| hsa-miR-513b | PARP16  | PARP16  | - |
| hsa-miR-513b | PARP2   | PARP2   | - |
| hsa-miR-513b | PATE4   | PATE4   | - |
| hsa-miR-513b | PATZ1   | PATZ1   | - |
| hsa-miR-513b | PAX6    | PAX6    | - |
| hsa-miR-513b | PCBP2   | PCBP2   | - |
| hsa-miR-513b | PCDH11X | PCDH11X | - |
| hsa-miR-513b | PCDH11Y | PCDH11Y | - |
| hsa-miR-513b | PCDH17  | PCDH17  | - |
| hsa-miR-513b | PCDH7   | PCDH7   | - |
| hsa-miR-513b | PCDHB11 | PCDHB11 | - |
| hsa-miR-513b | PCDHB13 | PCDHB13 | - |
| hsa-miR-513b | PCDHB4  | PCDHB4  | - |
| hsa-miR-513b | PCGF6   | PCGF6   | - |
| hsa-miR-513b | PCLO    | PCLO    | - |
| hsa-miR-513b | PCMT1   | PCMT1   | - |
| hsa-miR-513b | PCMTD1  | PCMTD1  | - |
| hsa-miR-513b | PCMTD2  | PCMTD2  | - |
| hsa-miR-513b | PCNA    | PCNA    | - |
| hsa-miR-513b | PCNT    | PCNT    | - |
| hsa-miR-513b | PCNX    | PCNX    | - |
| hsa-miR-513b | PCSK1   | PCSK1   | - |
| hsa-miR-513b | PCSK2   | PCSK2   | - |
| hsa-miR-513b | PCTP    | PCTP    | - |
| hsa-miR-513b | PCYT1B  | PCYT1B  | - |
| hsa-miR-513b | PDCL3   | PDCL3   | - |
| hsa-miR-513b | PDDC1   | PDDC1   | - |
| hsa-miR-513b | PDE10A  | PDE10A  | - |
| hsa-miR-513b | PDE3B   | PDE3B   | - |
| hsa-miR-513b | PDE7B   | PDE7B   | - |
| hsa-miR-513b | PDGFRA  | PDGFRA  | - |
| hsa-miR-513b | PDK1    | PDK1    | - |
| hsa-miR-513b | PDK3    | PDK3    | - |
| hsa-miR-513b | PDLIM3  | PDLIM3  | - |
| hsa-miR-513b | PDP2    | PDP2    | - |
| hsa-miR-513b | PDS5A   | PDS5A   | - |
| hsa-miR-513b | PDS5B   | PDS5B   | - |
| hsa-miR-513b | PDXP    | PDXP    | - |
| hsa-miR-513b | PDZRN4  | PDZRN4  | - |
| hsa-miR-513b | PEA15   | PEA15   | - |

|              |         |         |   |
|--------------|---------|---------|---|
| hsa-miR-513b | PEG10   | PEG10   | - |
| hsa-miR-513b | PEG3    | PEG3    | - |
| hsa-miR-513b | PELO    | PELO    | - |
| hsa-miR-513b | PER2    | PER2    | - |
| hsa-miR-513b | PEX11A  | PEX11A  | - |
| hsa-miR-513b | PEX19   | PEX19   | - |
| hsa-miR-513b | PEX26   | PEX26   | - |
| hsa-miR-513b | PEX5    | PEX5    | - |
| hsa-miR-513b | PEX5L   | PEX5L   | - |
| hsa-miR-513b | PFKFB4  | PFKFB4  | - |
| hsa-miR-513b | PFN2    | PFN2    | - |
| hsa-miR-513b | PGAM5   | PGAM5   | - |
| hsa-miR-513b | PGRMC1  | PGRMC1  | - |
| hsa-miR-513b | PHACTR2 | PHACTR2 | - |
| hsa-miR-513b | PHC1    | PHC1    | - |
| hsa-miR-513b | PHF14   | PHF14   | - |
| hsa-miR-513b | PHF2    | PHF2    | - |
| hsa-miR-513b | PHOX2B  | PHOX2B  | - |
| hsa-miR-513b | PHTF2   | PHTF2   | - |
| hsa-miR-513b | PIGA    | PIGA    | - |
| hsa-miR-513b | PIGL    | PIGL    | - |
| hsa-miR-513b | PIGZ    | PIGZ    | - |
| hsa-miR-513b | PIH1D2  | PIH1D2  | - |
| hsa-miR-513b | PIK3CG  | PIK3CG  | - |
| hsa-miR-513b | PIK3IP1 | PIK3IP1 | - |
| hsa-miR-513b | PIK3R2  | PIK3R2  | - |
| hsa-miR-513b | PIK3R3  | PIK3R3  | - |
| hsa-miR-513b | PINK1   | PINK1   | - |
| hsa-miR-513b | PIP4K2B | PIP4K2B | - |
| hsa-miR-513b | PITPNA  | PITPNA  | - |
| hsa-miR-513b | PITPNB  | PITPNB  | - |
| hsa-miR-513b | PKD1L1  | PKD1L1  | - |
| hsa-miR-513b | PLA2R1  | PLA2R1  | - |
| hsa-miR-513b | PLAC1   | PLAC1   | - |
| hsa-miR-513b | PLCB1   | PLCB1   | - |
| hsa-miR-513b | PLD1    | PLD1    | - |
| hsa-miR-513b | PLEKHF2 | PLEKHF2 | - |
| hsa-miR-513b | PLGLB1  | PLGLB1  | - |
| hsa-miR-513b | PLGLB2  | PLGLB2  | - |
| hsa-miR-513b | PMCH    | PMCH    | - |
| hsa-miR-513b | PNMA2   | PNMA2   | - |
| hsa-miR-513b | PNMA5   | PNMA5   | - |
| hsa-miR-513b | POGZ    | POGZ    | - |
| hsa-miR-513b | POLE3   | POLE3   | - |
| hsa-miR-513b | POLK    | POLK    | - |
| hsa-miR-513b | POLR1D  | POLR1D  | - |
| hsa-miR-513b | POLR2D  | POLR2D  | - |
| hsa-miR-513b | POM121  | POM121  | - |
| hsa-miR-513b | POM121C | POM121C | - |
| hsa-miR-513b | POP1    | POP1    | - |
| hsa-miR-513b | POPDC3  | POPDC3  | - |

|              |          |          |   |
|--------------|----------|----------|---|
| hsa-miR-513b | PPA1     | PPA1     | - |
| hsa-miR-513b | PPAPDC1B | PPAPDC1B | - |
| hsa-miR-513b | PPARGC1A | PPARGC1A | - |
| hsa-miR-513b | PPHLN1   | PPHLN1   | - |
| hsa-miR-513b | PPID     | PPID     | - |
| hsa-miR-513b | PPM1B    | PPM1B    | - |
| hsa-miR-513b | PPM1F    | PPM1F    | - |
| hsa-miR-513b | PPP1R14C | PPP1R14C | - |
| hsa-miR-513b | PPP1R3A  | PPP1R3A  | - |
| hsa-miR-513b | PPP1R3D  | PPP1R3D  | - |
| hsa-miR-513b | PPP1R9A  | PPP1R9A  | - |
| hsa-miR-513b | PPP2CA   | PPP2CA   | - |
| hsa-miR-513b | PPP2R2C  | PPP2R2C  | - |
| hsa-miR-513b | PPP2R3A  | PPP2R3A  | - |
| hsa-miR-513b | PPP3CA   | PPP3CA   | - |
| hsa-miR-513b | PPP3R1   | PPP3R1   | - |
| hsa-miR-513b | PPP4R4   | PPP4R4   | - |
| hsa-miR-513b | PPP6C    | PPP6C    | - |
| hsa-miR-513b | PPPDE1   | PPPDE1   | - |
| hsa-miR-513b | PPTC7    | PPTC7    | - |
| hsa-miR-513b | PRDM16   | PRDM16   | - |
| hsa-miR-513b | PRDM4    | PRDM4    | - |
| hsa-miR-513b | PRDX6    | PRDX6    | - |
| hsa-miR-513b | PRELID2  | PRELID2  | - |
| hsa-miR-513b | PRELP    | PRELP    | - |
| hsa-miR-513b | PREP     | PREP     | - |
| hsa-miR-513b | PRKAA2   | PRKAA2   | - |
| hsa-miR-513b | PRKCB    | PRKCB    | - |
| hsa-miR-513b | PRKCE    | PRKCE    | - |
| hsa-miR-513b | PRKD1    | PRKD1    | - |
| hsa-miR-513b | PRKRIR   | PRKRIR   | - |
| hsa-miR-513b | PRMT6    | PRMT6    | - |
| hsa-miR-513b | PROK2    | PROK2    | - |
| hsa-miR-513b | PRPF39   | PRPF39   | - |
| hsa-miR-513b | PRPF4B   | PRPF4B   | - |
| hsa-miR-513b | PRR13    | PRR13    | - |
| hsa-miR-513b | PRR3     | PRR3     | - |
| hsa-miR-513b | PRSS12   | PRSS12   | - |
| hsa-miR-513b | PRSS54   | PRSS54   | - |
| hsa-miR-513b | PRTFDC1  | PRTFDC1  | - |
| hsa-miR-513b | PRTG     | PRTG     | - |
| hsa-miR-513b | PTCHD1   | PTCHD1   | - |
| hsa-miR-513b | PTGER2   | PTGER2   | - |
| hsa-miR-513b | PTGER3   | PTGER3   | - |
| hsa-miR-513b | PTGER4   | PTGER4   | - |
| hsa-miR-513b | PTGFR    | PTGFR    | - |
| hsa-miR-513b | PTGS2    | PTGS2    | - |
| hsa-miR-513b | PTHLH    | PTHLH    | - |
| hsa-miR-513b | PTPLA    | PTPLA    | - |
| hsa-miR-513b | PTPLAD1  | PTPLAD1  | - |
| hsa-miR-513b | PTPN14   | PTPN14   | - |

|              |          |          |   |
|--------------|----------|----------|---|
| hsa-miR-513b | PTPRB    | PTPRB    | - |
| hsa-miR-513b | PTPRJ    | PTPRJ    | - |
| hsa-miR-513b | PTPRK    | PTPRK    | - |
| hsa-miR-513b | PTPRM    | PTPRM    | - |
| hsa-miR-513b | PTPRO    | PTPRO    | - |
| hsa-miR-513b | PTPRR    | PTPRR    | - |
| hsa-miR-513b | PUS7L    | PUS7L    | - |
| hsa-miR-513b | PWWP2A   | PWWP2A   | - |
| hsa-miR-513b | PYCR2    | PYCR2    | - |
| hsa-miR-513b | PYGB     | PYGB     | - |
| hsa-miR-513b | PYROXD1  | PYROXD1  | - |
| hsa-miR-513b | QKI      | QKI      | - |
| hsa-miR-513b | QTRTD1   | QTRTD1   | - |
| hsa-miR-513b | RAB10    | RAB10    | - |
| hsa-miR-513b | RAB11A   | RAB11A   | - |
| hsa-miR-513b | RAB12    | RAB12    | - |
| hsa-miR-513b | RAB18    | RAB18    | - |
| hsa-miR-513b | RAB26    | RAB26    | - |
| hsa-miR-513b | RAB39B   | RAB39B   | - |
| hsa-miR-513b | RAB6B    | RAB6B    | - |
| hsa-miR-513b | RABEP1   | RABEP1   | - |
| hsa-miR-513b | RABGAP1  | RABGAP1  | - |
| hsa-miR-513b | RABGEF1  | RABGEF1  | - |
| hsa-miR-513b | RABIF    | RABIF    | - |
| hsa-miR-513b | RAD21    | RAD21    | - |
| hsa-miR-513b | RAD51AP1 | RAD51AP1 | - |
| hsa-miR-513b | RAD51C   | RAD51C   | - |
| hsa-miR-513b | RALA     | RALA     | - |
| hsa-miR-513b | RALGPS1  | RALGPS1  | - |
| hsa-miR-513b | RANBP10  | RANBP10  | - |
| hsa-miR-513b | RANBP6   | RANBP6   | - |
| hsa-miR-513b | RAP2A    | RAP2A    | - |
| hsa-miR-513b | RAPGEF2  | RAPGEF2  | - |
| hsa-miR-513b | RASA1    | RASA1    | - |
| hsa-miR-513b | RASGRF1  | RASGRF1  | - |
| hsa-miR-513b | RASGRP2  | RASGRP2  | - |
| hsa-miR-513b | RASSF2   | RASSF2   | - |
| hsa-miR-513b | RASSF8   | RASSF8   | - |
| hsa-miR-513b | RAVER2   | RAVER2   | - |
| hsa-miR-513b | RAX      | RAX      | - |
| hsa-miR-513b | RB1CC1   | RB1CC1   | - |
| hsa-miR-513b | RBAK     | RBAK     | - |
| hsa-miR-513b | RBBP5    | RBBP5    | - |
| hsa-miR-513b | RBM17    | RBM17    | - |
| hsa-miR-513b | RBM20    | RBM20    | - |
| hsa-miR-513b | RBM25    | RBM25    | - |
| hsa-miR-513b | RBM27    | RBM27    | - |
| hsa-miR-513b | RBM5     | RBM5     | - |
| hsa-miR-513b | RBMS3    | RBMS3    | - |
| hsa-miR-513b | RBMX     | RBMX     | - |
| hsa-miR-513b | RBMXL1   | RBMXL1   | - |

|              |         |         |   |
|--------------|---------|---------|---|
| hsa-miR-513b | RBPM5   | RBPM5   | - |
| hsa-miR-513b | RC3H1   | RC3H1   | - |
| hsa-miR-513b | RDH12   | RDH12   | - |
| hsa-miR-513b | RECK    | RECK    | - |
| hsa-miR-513b | REPS1   | REPS1   | - |
| hsa-miR-513b | RERE    | RERE    | - |
| hsa-miR-513b | REV1    | REV1    | - |
| hsa-miR-513b | RFX3    | RFX3    | - |
| hsa-miR-513b | RFX4    | RFX4    | - |
| hsa-miR-513b | RFX7    | RFX7    | - |
| hsa-miR-513b | RGL1    | RGL1    | - |
| hsa-miR-513b | RGMB    | RGMB    | - |
| hsa-miR-513b | RGS22   | RGS22   | - |
| hsa-miR-513b | RHO     | RHO     | - |
| hsa-miR-513b | RHOA    | RHOA    | - |
| hsa-miR-513b | RHOQ    | RHOQ    | - |
| hsa-miR-513b | RIMS1   | RIMS1   | - |
| hsa-miR-513b | RIN2    | RIN2    | - |
| hsa-miR-513b | RIN3    | RIN3    | - |
| hsa-miR-513b | RMND5A  | RMND5A  | - |
| hsa-miR-513b | RNASE2  | RNASE2  | - |
| hsa-miR-513b | RNASE3  | RNASE3  | - |
| hsa-miR-513b | RNASE7  | RNASE7  | - |
| hsa-miR-513b | RNASEL  | RNASEL  | - |
| hsa-miR-513b | RNF111  | RNF111  | - |
| hsa-miR-513b | RNF128  | RNF128  | - |
| hsa-miR-513b | RNF149  | RNF149  | - |
| hsa-miR-513b | RNF170  | RNF170  | - |
| hsa-miR-513b | RNF20   | RNF20   | - |
| hsa-miR-513b | RNF217  | RNF217  | - |
| hsa-miR-513b | RNF24   | RNF24   | - |
| hsa-miR-513b | RNF38   | RNF38   | - |
| hsa-miR-513b | ROCK1   | ROCK1   | - |
| hsa-miR-513b | RP2     | RP2     | - |
| hsa-miR-513b | RPL13A  | RPL13A  | - |
| hsa-miR-513b | RPL28   | RPL28   | - |
| hsa-miR-513b | RPL32   | RPL32   | - |
| hsa-miR-513b | RPL9    | RPL9    | - |
| hsa-miR-513b | RPRD1A  | RPRD1A  | - |
| hsa-miR-513b | RPS27L  | RPS27L  | - |
| hsa-miR-513b | RPS6KB1 | RPS6KB1 | - |
| hsa-miR-513b | RPS6KL1 | RPS6KL1 | - |
| hsa-miR-513b | RPUSD3  | RPUSD3  | - |
| hsa-miR-513b | RRAS2   | RRAS2   | - |
| hsa-miR-513b | RREB1   | RREB1   | - |
| hsa-miR-513b | RRN3    | RRN3    | - |
| hsa-miR-513b | RSF1    | RSF1    | - |
| hsa-miR-513b | RSL24D1 | RSL24D1 | - |
| hsa-miR-513b | RTKN    | RTKN    | - |
| hsa-miR-513b | RTKN2   | RTKN2   | - |
| hsa-miR-513b | RTN4    | RTN4    | - |

|              |           |           |   |
|--------------|-----------|-----------|---|
| hsa-miR-513b | RUFY1     | RUFY1     | - |
| hsa-miR-513b | RUFY2     | RUFY2     | - |
| hsa-miR-513b | RUNX1T1   | RUNX1T1   | - |
| hsa-miR-513b | RYBP      | RYBP      | - |
| hsa-miR-513b | RYR3      | RYR3      | - |
| hsa-miR-513b | S100PBP   | S100PBP   | - |
| hsa-miR-513b | S1PR2     | S1PR2     | - |
| hsa-miR-513b | S1PR5     | S1PR5     | - |
| hsa-miR-513b | SALL2     | SALL2     | - |
| hsa-miR-513b | SALL3     | SALL3     | - |
| hsa-miR-513b | SAMD3     | SAMD3     | - |
| hsa-miR-513b | SAMD4A    | SAMD4A    | - |
| hsa-miR-513b | SAMD8     | SAMD8     | - |
| hsa-miR-513b | SAMD9     | SAMD9     | - |
| hsa-miR-513b | SATB2     | SATB2     | - |
| hsa-miR-513b | SBF2      | SBF2      | - |
| hsa-miR-513b | SCARB2    | SCARB2    | - |
| hsa-miR-513b | SCD       | SCD       | - |
| hsa-miR-513b | SCG3      | SCG3      | - |
| hsa-miR-513b | SCHIP1    | SCHIP1    | - |
| hsa-miR-513b | SCML4     | SCML4     | - |
| hsa-miR-513b | SCN5A     | SCN5A     | - |
| hsa-miR-513b | SCN9A     | SCN9A     | - |
| hsa-miR-513b | SCOC      | SCOC      | - |
| hsa-miR-513b | SDC2      | SDC2      | - |
| hsa-miR-513b | SDC4      | SDC4      | - |
| hsa-miR-513b | SDHA      | SDHA      | - |
| hsa-miR-513b | SEC23A    | SEC23A    | - |
| hsa-miR-513b | SECISBP2L | SECISBP2L | - |
| hsa-miR-513b | SEL1L     | SEL1L     | - |
| hsa-miR-513b | SEMA3E    | SEMA3E    | - |
| hsa-miR-513b | SENP5     | SENP5     | - |
| hsa-miR-513b | SENP7     | SENP7     | - |
| hsa-miR-513b | SEPT7     | SEPT7     | - |
| hsa-miR-513b | SEPT8     | SEPT8     | - |
| hsa-miR-513b | SETD1B    | SETD1B    | - |
| hsa-miR-513b | SETD5     | SETD5     | - |
| hsa-miR-513b | SEZ6L     | SEZ6L     | - |
| hsa-miR-513b | SF3A1     | SF3A1     | - |
| hsa-miR-513b | SF3B14    | SF3B14    | - |
| hsa-miR-513b | SFT2D2    | SFT2D2    | - |
| hsa-miR-513b | SFT2D3    | SFT2D3    | - |
| hsa-miR-513b | SFTPB     | SFTPB     | - |
| hsa-miR-513b | SGCZ      | SGCZ      | - |
| hsa-miR-513b | SGMS2     | SGMS2     | - |
| hsa-miR-513b | SGOL1     | SGOL1     | - |
| hsa-miR-513b | SGSM1     | SGSM1     | - |
| hsa-miR-513b | SH2B3     | SH2B3     | - |
| hsa-miR-513b | SH2D1A    | SH2D1A    | - |
| hsa-miR-513b | SH2D1B    | SH2D1B    | - |
| hsa-miR-513b | SH3BGRL2  | SH3BGRL2  | - |

|              |          |          |   |
|--------------|----------|----------|---|
| hsa-miR-513b | SH3GL2   | SH3GL2   | - |
| hsa-miR-513b | SH3YL1   | SH3YL1   | - |
| hsa-miR-513b | SHISA6   | SHISA6   | - |
| hsa-miR-513b | SHISA9   | SHISA9   | - |
| hsa-miR-513b | SHOC2    | SHOC2    | - |
| hsa-miR-513b | SHPK     | SHPK     | - |
| hsa-miR-513b | SHPRH    | SHPRH    | - |
| hsa-miR-513b | SIDT1    | SIDT1    | - |
| hsa-miR-513b | SIGLEC14 | SIGLEC14 | - |
| hsa-miR-513b | SIK3     | SIK3     | - |
| hsa-miR-513b | SIM2     | SIM2     | - |
| hsa-miR-513b | SIRPA    | SIRPA    | - |
| hsa-miR-513b | SIRT1    | SIRT1    | - |
| hsa-miR-513b | SIX1     | SIX1     | - |
| hsa-miR-513b | SKA1     | SKA1     | - |
| hsa-miR-513b | SLC10A2  | SLC10A2  | - |
| hsa-miR-513b | SLC10A7  | SLC10A7  | - |
| hsa-miR-513b | SLC12A2  | SLC12A2  | - |
| hsa-miR-513b | SLC16A10 | SLC16A10 | - |
| hsa-miR-513b | SLC17A4  | SLC17A4  | - |
| hsa-miR-513b | SLC17A6  | SLC17A6  | - |
| hsa-miR-513b | SLC20A1  | SLC20A1  | - |
| hsa-miR-513b | SLC22A15 | SLC22A15 | - |
| hsa-miR-513b | SLC22A23 | SLC22A23 | - |
| hsa-miR-513b | SLC24A1  | SLC24A1  | - |
| hsa-miR-513b | SLC24A3  | SLC24A3  | - |
| hsa-miR-513b | SLC25A13 | SLC25A13 | - |
| hsa-miR-513b | SLC25A17 | SLC25A17 | - |
| hsa-miR-513b | SLC25A36 | SLC25A36 | - |
| hsa-miR-513b | SLC25A44 | SLC25A44 | - |
| hsa-miR-513b | SLC26A5  | SLC26A5  | - |
| hsa-miR-513b | SLC30A10 | SLC30A10 | - |
| hsa-miR-513b | SLC30A5  | SLC30A5  | - |
| hsa-miR-513b | SLC30A9  | SLC30A9  | - |
| hsa-miR-513b | SLC35A1  | SLC35A1  | - |
| hsa-miR-513b | SLC35A2  | SLC35A2  | - |
| hsa-miR-513b | SLC35A4  | SLC35A4  | - |
| hsa-miR-513b | SLC35B4  | SLC35B4  | - |
| hsa-miR-513b | SLC35D2  | SLC35D2  | - |
| hsa-miR-513b | SLC35F1  | SLC35F1  | - |
| hsa-miR-513b | SLC38A1  | SLC38A1  | - |
| hsa-miR-513b | SLC38A10 | SLC38A10 | - |
| hsa-miR-513b | SLC39A10 | SLC39A10 | - |
| hsa-miR-513b | SLC39A3  | SLC39A3  | - |
| hsa-miR-513b | SLC39A9  | SLC39A9  | - |
| hsa-miR-513b | SLC40A1  | SLC40A1  | - |
| hsa-miR-513b | SLC44A5  | SLC44A5  | - |
| hsa-miR-513b | SLC4A10  | SLC4A10  | - |
| hsa-miR-513b | SLC4A8   | SLC4A8   | - |
| hsa-miR-513b | SLC5A1   | SLC5A1   | - |
| hsa-miR-513b | SLC5A8   | SLC5A8   | - |



|              |          |          |   |
|--------------|----------|----------|---|
| hsa-miR-513b | SLC6A14  | SLC6A14  | - |
| hsa-miR-513b | SLC6A4   | SLC6A4   | - |
| hsa-miR-513b | SLC7A2   | SLC7A2   | - |
| hsa-miR-513b | SLC7A6OS | SLC7A6OS | - |
| hsa-miR-513b | SLC9A11  | SLC9A11  | - |
| hsa-miR-513b | SLFN5    | SLFN5    | - |
| hsa-miR-513b | SLFNL1   | SLFNL1   | - |
| hsa-miR-513b | SLMAP    | SLMAP    | - |
| hsa-miR-513b | SLTM     | SLTM     | - |
| hsa-miR-513b | SMAD5    | SMAD5    | - |
| hsa-miR-513b | SMAP1    | SMAP1    | - |
| hsa-miR-513b | SMARCAD1 | SMARCAD1 | - |
| hsa-miR-513b | SMARCD1  | SMARCD1  | - |
| hsa-miR-513b | SMCHD1   | SMCHD1   | - |
| hsa-miR-513b | SMEK1    | SMEK1    | - |
| hsa-miR-513b | SMS      | SMS      | - |
| hsa-miR-513b | SMURF1   | SMURF1   | - |
| hsa-miR-513b | SNAI2    | SNAI2    | - |
| hsa-miR-513b | SNAP25   | SNAP25   | - |
| hsa-miR-513b | SNCA     | SNCA     | - |
| hsa-miR-513b | SNRPB2   | SNRPB2   | - |
| hsa-miR-513b | SNRPF    | SNRPF    | - |
| hsa-miR-513b | SNRPN    | SNRPN    | - |
| hsa-miR-513b | SNTB1    | SNTB1    | - |
| hsa-miR-513b | SNURF    | SNURF    | - |
| hsa-miR-513b | SNX2     | SNX2     | - |
| hsa-miR-513b | SNX25    | SNX25    | - |
| hsa-miR-513b | SOBP     | SOBP     | - |
| hsa-miR-513b | SOCS4    | SOCS4    | - |
| hsa-miR-513b | SOCS5    | SOCS5    | - |
| hsa-miR-513b | SOCS6    | SOCS6    | - |
| hsa-miR-513b | SOLH     | SOLH     | - |
| hsa-miR-513b | SORCS1   | SORCS1   | - |
| hsa-miR-513b | SORD     | SORD     | - |
| hsa-miR-513b | SOS1     | SOS1     | - |
| hsa-miR-513b | SOS2     | SOS2     | - |
| hsa-miR-513b | SOX11    | SOX11    | - |
| hsa-miR-513b | SOX21    | SOX21    | - |
| hsa-miR-513b | SOX5     | SOX5     | - |
| hsa-miR-513b | SPA17    | SPA17    | - |
| hsa-miR-513b | SPAG9    | SPAG9    | - |
| hsa-miR-513b | SPARCL1  | SPARCL1  | - |
| hsa-miR-513b | SPATA2   | SPATA2   | - |
| hsa-miR-513b | SPATA3   | SPATA3   | - |
| hsa-miR-513b | SPIB     | SPIB     | - |
| hsa-miR-513b | SPIN1    | SPIN1    | - |
| hsa-miR-513b | SPIN2A   | SPIN2A   | - |
| hsa-miR-513b | SPIN3    | SPIN3    | - |
| hsa-miR-513b | SPIN4    | SPIN4    | - |
| hsa-miR-513b | SPINK9   | SPINK9   | - |
| hsa-miR-513b | SPOP     | SPOP     | - |

|              |               |               |   |
|--------------|---------------|---------------|---|
| hsa-miR-513b | SPP2          | SPP2          | - |
| hsa-miR-513b | SPRED1        | SPRED1        | - |
| hsa-miR-513b | SPRED2        | SPRED2        | - |
| hsa-miR-513b | SPRY2         | SPRY2         | - |
| hsa-miR-513b | SPRYD4        | SPRYD4        | - |
| hsa-miR-513b | SPSB4         | SPSB4         | - |
| hsa-miR-513b | SPTBN1        | SPTBN1        | - |
| hsa-miR-513b | SPTLC1        | SPTLC1        | - |
| hsa-miR-513b | SPTLC2        | SPTLC2        | - |
| hsa-miR-513b | SRCRB4D       | SRCRB4D       | - |
| hsa-miR-513b | SRD5A2        | SRD5A2        | - |
| hsa-miR-513b | SRFBP1        | SRFBP1        | - |
| hsa-miR-513b | SRGAP1        | SRGAP1        | - |
| hsa-miR-513b | SRGN          | SRGN          | - |
| hsa-miR-513b | SRP72         | SRP72         | - |
| hsa-miR-513b | SRPK2         | SRPK2         | - |
| hsa-miR-513b | SSBP2         | SSBP2         | - |
| hsa-miR-513b | SSH1          | SSH1          | - |
| hsa-miR-513b | SSPO          | SSPO          | - |
| hsa-miR-513b | SSTR2         | SSTR2         | - |
| hsa-miR-513b | SSX2IP        | SSX2IP        | - |
| hsa-miR-513b | ST3GAL3       | ST3GAL3       | - |
| hsa-miR-513b | ST6GALNAC1    | ST6GALNAC1    | - |
| hsa-miR-513b | STAG1         | STAG1         | - |
| hsa-miR-513b | STAG2         | STAG2         | - |
| hsa-miR-513b | STAG3L1       | STAG3L1       | - |
| hsa-miR-513b | STAG3L4       | STAG3L4       | - |
| hsa-miR-513b | STAM2         | STAM2         | - |
| hsa-miR-513b | STARD13       | STARD13       | - |
| hsa-miR-513b | STAU1         | STAU1         | - |
| hsa-miR-513b | STC1          | STC1          | - |
| hsa-miR-513b | STEAP2        | STEAP2        | - |
| hsa-miR-513b | STIM2         | STIM2         | - |
| hsa-miR-513b | STK24         | STK24         | - |
| hsa-miR-513b | STK31         | STK31         | - |
| hsa-miR-513b | STK38L        | STK38L        | - |
| hsa-miR-513b | STMN1         | STMN1         | - |
| hsa-miR-513b | STOM          | STOM          | - |
| hsa-miR-513b | STON1         | STON1         | - |
| hsa-miR-513b | STON1-GTF2A1L | STON1-GTF2A1L | - |
| hsa-miR-513b | STRBP         | STRBP         | - |
| hsa-miR-513b | STX16         | STX16         | - |
| hsa-miR-513b | STX1A         | STX1A         | - |
| hsa-miR-513b | STX2          | STX2          | - |
| hsa-miR-513b | STXBP4        | STXBP4        | - |
| hsa-miR-513b | STXBP5        | STXBP5        | - |
| hsa-miR-513b | SUB1          | SUB1          | - |
| hsa-miR-513b | SUCNR1        | SUCNR1        | - |
| hsa-miR-513b | SUDS3         | SUDS3         | - |
| hsa-miR-513b | SUMF1         | SUMF1         | - |
| hsa-miR-513b | SUN1          | SUN1          | - |

|              |          |          |   |
|--------------|----------|----------|---|
| hsa-miR-513b | SUPT3H   | SUPT3H   | - |
| hsa-miR-513b | SUPT6H   | SUPT6H   | - |
| hsa-miR-513b | SUV39H2  | SUV39H2  | - |
| hsa-miR-513b | SUV420H1 | SUV420H1 | - |
| hsa-miR-513b | SV2B     | SV2B     | - |
| hsa-miR-513b | SVEP1    | SVEP1    | - |
| hsa-miR-513b | SWAP70   | SWAP70   | - |
| hsa-miR-513b | SYN2     | SYN2     | - |
| hsa-miR-513b | SYNJ1    | SYNJ1    | - |
| hsa-miR-513b | SYNPO2   | SYNPO2   | - |
| hsa-miR-513b | SYNPO2L  | SYNPO2L  | - |
| hsa-miR-513b | SYNPR    | SYNPR    | - |
| hsa-miR-513b | SYNRG    | SYNRG    | - |
| hsa-miR-513b | SYPL1    | SYPL1    | - |
| hsa-miR-513b | SYT13    | SYT13    | - |
| hsa-miR-513b | SYT16    | SYT16    | - |
| hsa-miR-513b | SYT4     | SYT4     | - |
| hsa-miR-513b | SYT7     | SYT7     | - |
| hsa-miR-513b | TACC1    | TACC1    | - |
| hsa-miR-513b | TADA1    | TADA1    | - |
| hsa-miR-513b | TAF11    | TAF11    | - |
| hsa-miR-513b | TAF1D    | TAF1D    | - |
| hsa-miR-513b | TAF5L    | TAF5L    | - |
| hsa-miR-513b | TAL1     | TAL1     | - |
| hsa-miR-513b | TANC1    | TANC1    | - |
| hsa-miR-513b | TAOK1    | TAOK1    | - |
| hsa-miR-513b | TAOK3    | TAOK3    | - |
| hsa-miR-513b | TBC1D22B | TBC1D22B | - |
| hsa-miR-513b | TBC1D4   | TBC1D4   | - |
| hsa-miR-513b | TBCEL    | TBCEL    | - |
| hsa-miR-513b | TBL1XR1  | TBL1XR1  | - |
| hsa-miR-513b | TBPL1    | TBPL1    | - |
| hsa-miR-513b | TBR1     | TBR1     | - |
| hsa-miR-513b | TBX18    | TBX18    | - |
| hsa-miR-513b | TBX3     | TBX3     | - |
| hsa-miR-513b | TCEAL1   | TCEAL1   | - |
| hsa-miR-513b | TCERG1   | TCERG1   | - |
| hsa-miR-513b | TCERG1L  | TCERG1L  | - |
| hsa-miR-513b | TCF4     | TCF4     | - |
| hsa-miR-513b | TCF7L2   | TCF7L2   | - |
| hsa-miR-513b | TCL1A    | TCL1A    | - |
| hsa-miR-513b | TDRD3    | TDRD3    | - |
| hsa-miR-513b | TEP1     | TEP1     | - |
| hsa-miR-513b | TERF2    | TERF2    | - |
| hsa-miR-513b | TET3     | TET3     | - |
| hsa-miR-513b | TFAP2A   | TFAP2A   | - |
| hsa-miR-513b | TFPI     | TFPI     | - |
| hsa-miR-513b | TGFBR1   | TGFBR1   | - |
| hsa-miR-513b | TGM2     | TGM2     | - |
| hsa-miR-513b | THAP2    | THAP2    | - |
| hsa-miR-513b | THAP6    | THAP6    | - |

|              |           |           |   |
|--------------|-----------|-----------|---|
| hsa-miR-513b | THSD7A    | THSD7A    | - |
| hsa-miR-513b | TIAF1     | TIAF1     | - |
| hsa-miR-513b | TIMM8A    | TIMM8A    | - |
| hsa-miR-513b | TIPARP    | TIPARP    | - |
| hsa-miR-513b | TIPRL     | TIPRL     | - |
| hsa-miR-513b | TKTL1     | TKTL1     | - |
| hsa-miR-513b | TLE1      | TLE1      | - |
| hsa-miR-513b | TLE4      | TLE4      | - |
| hsa-miR-513b | TLL2      | TLL2      | - |
| hsa-miR-513b | TM2D2     | TM2D2     | - |
| hsa-miR-513b | TM4SF4    | TM4SF4    | - |
| hsa-miR-513b | TM6SF1    | TM6SF1    | - |
| hsa-miR-513b | TM9SF3    | TM9SF3    | - |
| hsa-miR-513b | TM9SF4    | TM9SF4    | - |
| hsa-miR-513b | TMC8      | TMC8      | - |
| hsa-miR-513b | TMCC1     | TMCC1     | - |
| hsa-miR-513b | TMED10    | TMED10    | - |
| hsa-miR-513b | TMED4     | TMED4     | - |
| hsa-miR-513b | TMEFF1    | TMEFF1    | - |
| hsa-miR-513b | TMEM120B  | TMEM120B  | - |
| hsa-miR-513b | TMEM123   | TMEM123   | - |
| hsa-miR-513b | TMEM132B  | TMEM132B  | - |
| hsa-miR-513b | TMEM138   | TMEM138   | - |
| hsa-miR-513b | TMEM156   | TMEM156   | - |
| hsa-miR-513b | TMEM167B  | TMEM167B  | - |
| hsa-miR-513b | TMEM179   | TMEM179   | - |
| hsa-miR-513b | TMEM18    | TMEM18    | - |
| hsa-miR-513b | TMEM181   | TMEM181   | - |
| hsa-miR-513b | TMEM182   | TMEM182   | - |
| hsa-miR-513b | TMEM188   | TMEM188   | - |
| hsa-miR-513b | TMEM192   | TMEM192   | - |
| hsa-miR-513b | TMEM194A  | TMEM194A  | - |
| hsa-miR-513b | TMEM194B  | TMEM194B  | - |
| hsa-miR-513b | TMEM196   | TMEM196   | - |
| hsa-miR-513b | TMEM20    | TMEM20    | - |
| hsa-miR-513b | TMEM200A  | TMEM200A  | - |
| hsa-miR-513b | TMEM203   | TMEM203   | - |
| hsa-miR-513b | TMEM231   | TMEM231   | - |
| hsa-miR-513b | TMEM26    | TMEM26    | - |
| hsa-miR-513b | TMEM30A   | TMEM30A   | - |
| hsa-miR-513b | TMEM39A   | TMEM39A   | - |
| hsa-miR-513b | TMEM44    | TMEM44    | - |
| hsa-miR-513b | TMEM56    | TMEM56    | - |
| hsa-miR-513b | TMEM64    | TMEM64    | - |
| hsa-miR-513b | TMEM66    | TMEM66    | - |
| hsa-miR-513b | TMEM97    | TMEM97    | - |
| hsa-miR-513b | TMF1      | TMF1      | - |
| hsa-miR-513b | TMIGD2    | TMIGD2    | - |
| hsa-miR-513b | TMLHE     | TMLHE     | - |
| hsa-miR-513b | TMPPE     | TMPPE     | - |
| hsa-miR-513b | TMPRSS11F | TMPRSS11F | - |

|              |           |           |   |
|--------------|-----------|-----------|---|
| hsa-miR-513b | TMPRSS2   | TMPRSS2   | - |
| hsa-miR-513b | TMSB4Y    | TMSB4Y    | - |
| hsa-miR-513b | TMX1      | TMX1      | - |
| hsa-miR-513b | TMX3      | TMX3      | - |
| hsa-miR-513b | TMX4      | TMX4      | - |
| hsa-miR-513b | TNF       | TNF       | - |
| hsa-miR-513b | TNFRSF10C | TNFRSF10C | - |
| hsa-miR-513b | TNFRSF19  | TNFRSF19  | - |
| hsa-miR-513b | TNFRSF21  | TNFRSF21  | - |
| hsa-miR-513b | TNFSF4    | TNFSF4    | - |
| hsa-miR-513b | TNFSF8    | TNFSF8    | - |
| hsa-miR-513b | TNFSF9    | TNFSF9    | - |
| hsa-miR-513b | TNIK      | TNIK      | - |
| hsa-miR-513b | TNKS2     | TNKS2     | - |
| hsa-miR-513b | TNN       | TNN       | - |
| hsa-miR-513b | TNPO1     | TNPO1     | - |
| hsa-miR-513b | TNPO2     | TNPO2     | - |
| hsa-miR-513b | TNRC6A    | TNRC6A    | - |
| hsa-miR-513b | TNRC6B    | TNRC6B    | - |
| hsa-miR-513b | TOMM20    | TOMM20    | - |
| hsa-miR-513b | TOR2A     | TOR2A     | - |
| hsa-miR-513b | TP53RK    | TP53RK    | - |
| hsa-miR-513b | TPD52L1   | TPD52L1   | - |
| hsa-miR-513b | TPR       | TPR       | - |
| hsa-miR-513b | TPRG1     | TPRG1     | - |
| hsa-miR-513b | TRA2A     | TRA2A     | - |
| hsa-miR-513b | TRAF3     | TRAF3     | - |
| hsa-miR-513b | TRAF5     | TRAF5     | - |
| hsa-miR-513b | TRAK1     | TRAK1     | - |
| hsa-miR-513b | TRAK2     | TRAK2     | - |
| hsa-miR-513b | TRAM1     | TRAM1     | - |
| hsa-miR-513b | TRAPPC10  | TRAPPC10  | - |
| hsa-miR-513b | TRAPPC2   | TRAPPC2   | - |
| hsa-miR-513b | TRAPPC2L  | TRAPPC2L  | - |
| hsa-miR-513b | TRDMT1    | TRDMT1    | - |
| hsa-miR-513b | TRDN      | TRDN      | - |
| hsa-miR-513b | TREML2    | TREML2    | - |
| hsa-miR-513b | TRIB1     | TRIB1     | - |
| hsa-miR-513b | TRIM13    | TRIM13    | - |
| hsa-miR-513b | TRIM2     | TRIM2     | - |
| hsa-miR-513b | TRIM23    | TRIM23    | - |
| hsa-miR-513b | TRIM26    | TRIM26    | - |
| hsa-miR-513b | TRIM27    | TRIM27    | - |
| hsa-miR-513b | TRIM40    | TRIM40    | - |
| hsa-miR-513b | TRIM5     | TRIM5     | - |
| hsa-miR-513b | TRIM52    | TRIM52    | - |
| hsa-miR-513b | TRIM55    | TRIM55    | - |
| hsa-miR-513b | TRIP13    | TRIP13    | - |
| hsa-miR-513b | TRMT5     | TRMT5     | - |
| hsa-miR-513b | TRNAU1AP  | TRNAU1AP  | - |
| hsa-miR-513b | TRNT1     | TRNT1     | - |

|              |         |         |   |
|--------------|---------|---------|---|
| hsa-miR-513b | TRPC6   | TRPC6   | - |
| hsa-miR-513b | TRUB1   | TRUB1   | - |
| hsa-miR-513b | TSC1    | TSC1    | - |
| hsa-miR-513b | TSGA14  | TSGA14  | - |
| hsa-miR-513b | TSLP    | TSLP    | - |
| hsa-miR-513b | TSN     | TSN     | - |
| hsa-miR-513b | TSNAX   | TSNAX   | - |
| hsa-miR-513b | TSPAN12 | TSPAN12 | - |
| hsa-miR-513b | TSPAN7  | TSPAN7  | - |
| hsa-miR-513b | TSPYL1  | TSPYL1  | - |
| hsa-miR-513b | TSPYL4  | TSPYL4  | - |
| hsa-miR-513b | TTC17   | TTC17   | - |
| hsa-miR-513b | TTC3    | TTC3    | - |
| hsa-miR-513b | TTC39B  | TTC39B  | - |
| hsa-miR-513b | TTC39C  | TTC39C  | - |
| hsa-miR-513b | TXNDC5  | TXNDC5  | - |
| hsa-miR-513b | TXNDC9  | TXNDC9  | - |
| hsa-miR-513b | UAP1L1  | UAP1L1  | - |
| hsa-miR-513b | UBA52   | UBA52   | - |
| hsa-miR-513b | UBE2D1  | UBE2D1  | - |
| hsa-miR-513b | UBE2D2  | UBE2D2  | - |
| hsa-miR-513b | UBE2E1  | UBE2E1  | - |
| hsa-miR-513b | UBE2E3  | UBE2E3  | - |
| hsa-miR-513b | UBE2F   | UBE2F   | - |
| hsa-miR-513b | UBE2N   | UBE2N   | - |
| hsa-miR-513b | UBE2NL  | UBE2NL  | - |
| hsa-miR-513b | UBE2Q2  | UBE2Q2  | - |
| hsa-miR-513b | UBE2V2  | UBE2V2  | - |
| hsa-miR-513b | UBE2W   | UBE2W   | - |
| hsa-miR-513b | UBE2Z   | UBE2Z   | - |
| hsa-miR-513b | UBE4A   | UBE4A   | - |
| hsa-miR-513b | UBE4B   | UBE4B   | - |
| hsa-miR-513b | UBN2    | UBN2    | - |
| hsa-miR-513b | UBR2    | UBR2    | - |
| hsa-miR-513b | UBR5    | UBR5    | - |
| hsa-miR-513b | UBR7    | UBR7    | - |
| hsa-miR-513b | UBXN2B  | UBXN2B  | - |
| hsa-miR-513b | UBXN4   | UBXN4   | - |
| hsa-miR-513b | UCHL1   | UCHL1   | - |
| hsa-miR-513b | UFSP2   | UFSP2   | - |
| hsa-miR-513b | UGDH    | UGDH    | - |
| hsa-miR-513b | UGP2    | UGP2    | - |
| hsa-miR-513b | UGT2A1  | UGT2A1  | - |
| hsa-miR-513b | UGT2A2  | UGT2A2  | - |
| hsa-miR-513b | UGT2B4  | UGT2B4  | - |
| hsa-miR-513b | UGT3A1  | UGT3A1  | - |
| hsa-miR-513b | UHMK1   | UHMK1   | - |
| hsa-miR-513b | UHRF2   | UHRF2   | - |
| hsa-miR-513b | UMOD    | UMOD    | - |
| hsa-miR-513b | UNC5D   | UNC5D   | - |
| hsa-miR-513b | UNC80   | UNC80   | - |

|              |        |        |   |
|--------------|--------|--------|---|
| hsa-miR-513b | UROC1  | UROC1  | - |
| hsa-miR-513b | USH2A  | USH2A  | - |
| hsa-miR-513b | USP10  | USP10  | - |
| hsa-miR-513b | USP21  | USP21  | - |
| hsa-miR-513b | USP22  | USP22  | - |
| hsa-miR-513b | USP24  | USP24  | - |
| hsa-miR-513b | USP25  | USP25  | - |
| hsa-miR-513b | USP30  | USP30  | - |
| hsa-miR-513b | USP35  | USP35  | - |
| hsa-miR-513b | USP36  | USP36  | - |
| hsa-miR-513b | USP44  | USP44  | - |
| hsa-miR-513b | USP45  | USP45  | - |
| hsa-miR-513b | USP46  | USP46  | - |
| hsa-miR-513b | USP47  | USP47  | - |
| hsa-miR-513b | USP51  | USP51  | - |
| hsa-miR-513b | UTP23  | UTP23  | - |
| hsa-miR-513b | UTS2D  | UTS2D  | - |
| hsa-miR-513b | UTY    | UTY    | - |
| hsa-miR-513b | VAMP2  | VAMP2  | - |
| hsa-miR-513b | VAMP7  | VAMP7  | - |
| hsa-miR-513b | VAPA   | VAPA   | - |
| hsa-miR-513b | VASH2  | VASH2  | - |
| hsa-miR-513b | VAV2   | VAV2   | - |
| hsa-miR-513b | VCAN   | VCAN   | - |
| hsa-miR-513b | VCPIP1 | VCPIP1 | - |
| hsa-miR-513b | VEGFC  | VEGFC  | - |
| hsa-miR-513b | VIP    | VIP    | - |
| hsa-miR-513b | VPRBP  | VPRBP  | - |
| hsa-miR-513b | VPS13A | VPS13A | - |
| hsa-miR-513b | VPS13D | VPS13D | - |
| hsa-miR-513b | VPS24  | VPS24  | - |
| hsa-miR-513b | VPS26B | VPS26B | - |
| hsa-miR-513b | VPS35  | VPS35  | - |
| hsa-miR-513b | VPS45  | VPS45  | - |
| hsa-miR-513b | VTI1B  | VTI1B  | - |
| hsa-miR-513b | WAPAL  | WAPAL  | - |
| hsa-miR-513b | WASF1  | WASF1  | - |
| hsa-miR-513b | WBP5   | WBP5   | - |
| hsa-miR-513b | WDR1   | WDR1   | - |
| hsa-miR-513b | WDR17  | WDR17  | - |
| hsa-miR-513b | WDR37  | WDR37  | - |
| hsa-miR-513b | WDR41  | WDR41  | - |
| hsa-miR-513b | WDR47  | WDR47  | - |
| hsa-miR-513b | WDR5   | WDR5   | - |
| hsa-miR-513b | WDR52  | WDR52  | - |
| hsa-miR-513b | WDR5B  | WDR5B  | - |
| hsa-miR-513b | WDR7   | WDR7   | - |
| hsa-miR-513b | WDR73  | WDR73  | - |
| hsa-miR-513b | WDR77  | WDR77  | - |
| hsa-miR-513b | WDR89  | WDR89  | - |
| hsa-miR-513b | WEE1   | WEE1   | - |

|              |         |         |   |
|--------------|---------|---------|---|
| hsa-miR-513b | WHSC1   | WHSC1   | - |
| hsa-miR-513b | WIPF1   | WIPF1   | - |
| hsa-miR-513b | WNK3    | WNK3    | - |
| hsa-miR-513b | WNT11   | WNT11   | - |
| hsa-miR-513b | WRB     | WRB     | - |
| hsa-miR-513b | WSB1    | WSB1    | - |
| hsa-miR-513b | WSCD1   | WSCD1   | - |
| hsa-miR-513b | WWC3    | WWC3    | - |
| hsa-miR-513b | WWTR1   | WWTR1   | - |
| hsa-miR-513b | XAF1    | XAF1    | - |
| hsa-miR-513b | XBP1    | XBP1    | - |
| hsa-miR-513b | XG      | XG      | - |
| hsa-miR-513b | XRCC4   | XRCC4   | - |
| hsa-miR-513b | XRCC5   | XRCC5   | - |
| hsa-miR-513b | XRRA1   | XRRA1   | - |
| hsa-miR-513b | YES1    | YES1    | - |
| hsa-miR-513b | YME1L1  | YME1L1  | - |
| hsa-miR-513b | YPEL2   | YPEL2   | - |
| hsa-miR-513b | YPEL5   | YPEL5   | - |
| hsa-miR-513b | YTHDF2  | YTHDF2  | - |
| hsa-miR-513b | YWHAQ   | YWHAQ   | - |
| hsa-miR-513b | ZAK     | ZAK     | - |
| hsa-miR-513b | ZBTB10  | ZBTB10  | - |
| hsa-miR-513b | ZBTB20  | ZBTB20  | - |
| hsa-miR-513b | ZBTB38  | ZBTB38  | - |
| hsa-miR-513b | ZBTB41  | ZBTB41  | - |
| hsa-miR-513b | ZBTB5   | ZBTB5   | - |
| hsa-miR-513b | ZC3H6   | ZC3H6   | - |
| hsa-miR-513b | ZC3HAV1 | ZC3HAV1 | - |
| hsa-miR-513b | ZCCHC12 | ZCCHC12 | - |
| hsa-miR-513b | ZCCHC24 | ZCCHC24 | - |
| hsa-miR-513b | ZCCHC3  | ZCCHC3  | - |
| hsa-miR-513b | ZCWPW2  | ZCWPW2  | - |
| hsa-miR-513b | ZDHHC14 | ZDHHC14 | - |
| hsa-miR-513b | ZDHHC15 | ZDHHC15 | - |
| hsa-miR-513b | ZDHHC23 | ZDHHC23 | - |
| hsa-miR-513b | ZEB2    | ZEB2    | - |
| hsa-miR-513b | ZFAND3  | ZFAND3  | - |
| hsa-miR-513b | ZFAND5  | ZFAND5  | - |
| hsa-miR-513b | ZFHX4   | ZFHX4   | - |
| hsa-miR-513b | ZFP161  | ZFP161  | - |
| hsa-miR-513b | ZFP36L2 | ZFP36L2 | - |
| hsa-miR-513b | ZFP37   | ZFP37   | - |
| hsa-miR-513b | ZFP90   | ZFP90   | - |
| hsa-miR-513b | ZFP91   | ZFP91   | - |
| hsa-miR-513b | ZFYVE16 | ZFYVE16 | - |
| hsa-miR-513b | ZFYVE20 | ZFYVE20 | - |
| hsa-miR-513b | ZIC1    | ZIC1    | - |
| hsa-miR-513b | ZIC2    | ZIC2    | - |
| hsa-miR-513b | ZIC3    | ZIC3    | - |
| hsa-miR-513b | ZKSCAN2 | ZKSCAN2 | - |



|              |         |         |   |
|--------------|---------|---------|---|
| hsa-miR-513b | ZMAT2   | ZMAT2   | - |
| hsa-miR-513b | ZMIZ2   | ZMIZ2   | - |
| hsa-miR-513b | ZMYM2   | ZMYM2   | - |
| hsa-miR-513b | ZMYM4   | ZMYM4   | - |
| hsa-miR-513b | ZMYM5   | ZMYM5   | - |
| hsa-miR-513b | ZNF16   | ZNF16   | - |
| hsa-miR-513b | ZNF182  | ZNF182  | - |
| hsa-miR-513b | ZNF185  | ZNF185  | - |
| hsa-miR-513b | ZNF192  | ZNF192  | - |
| hsa-miR-513b | ZNF197  | ZNF197  | - |
| hsa-miR-513b | ZNF207  | ZNF207  | - |
| hsa-miR-513b | ZNF229  | ZNF229  | - |
| hsa-miR-513b | ZNF236  | ZNF236  | - |
| hsa-miR-513b | ZNF259  | ZNF259  | - |
| hsa-miR-513b | ZNF260  | ZNF260  | - |
| hsa-miR-513b | ZNF274  | ZNF274  | - |
| hsa-miR-513b | ZNF275  | ZNF275  | - |
| hsa-miR-513b | ZNF280B | ZNF280B | - |
| hsa-miR-513b | ZNF283  | ZNF283  | - |
| hsa-miR-513b | ZNF295  | ZNF295  | - |
| hsa-miR-513b | ZNF300  | ZNF300  | - |
| hsa-miR-513b | ZNF317  | ZNF317  | - |
| hsa-miR-513b | ZNF318  | ZNF318  | - |
| hsa-miR-513b | ZNF326  | ZNF326  | - |
| hsa-miR-513b | ZNF334  | ZNF334  | - |
| hsa-miR-513b | ZNF345  | ZNF345  | - |
| hsa-miR-513b | ZNF37A  | ZNF37A  | - |
| hsa-miR-513b | ZNF396  | ZNF396  | - |
| hsa-miR-513b | ZNF397  | ZNF397  | - |
| hsa-miR-513b | ZNF398  | ZNF398  | - |
| hsa-miR-513b | ZNF407  | ZNF407  | - |
| hsa-miR-513b | ZNF417  | ZNF417  | - |
| hsa-miR-513b | ZNF418  | ZNF418  | - |
| hsa-miR-513b | ZNF419  | ZNF419  | - |
| hsa-miR-513b | ZNF470  | ZNF470  | - |
| hsa-miR-513b | ZNF483  | ZNF483  | - |
| hsa-miR-513b | ZNF485  | ZNF485  | - |
| hsa-miR-513b | ZNF493  | ZNF493  | - |
| hsa-miR-513b | ZNF512  | ZNF512  | - |
| hsa-miR-513b | ZNF516  | ZNF516  | - |
| hsa-miR-513b | ZNF518A | ZNF518A | - |
| hsa-miR-513b | ZNF526  | ZNF526  | - |
| hsa-miR-513b | ZNF527  | ZNF527  | - |
| hsa-miR-513b | ZNF529  | ZNF529  | - |
| hsa-miR-513b | ZNF530  | ZNF530  | - |
| hsa-miR-513b | ZNF532  | ZNF532  | - |
| hsa-miR-513b | ZNF544  | ZNF544  | - |
| hsa-miR-513b | ZNF549  | ZNF549  | - |
| hsa-miR-513b | ZNF558  | ZNF558  | - |
| hsa-miR-513b | ZNF559  | ZNF559  | - |
| hsa-miR-513b | ZNF562  | ZNF562  | - |

|              |          |          |          |
|--------------|----------|----------|----------|
| hsa-miR-513b | ZNF577   | ZNF577   | -        |
| hsa-miR-513b | ZNF585A  | ZNF585A  | -        |
| hsa-miR-513b | ZNF626   | ZNF626   | -        |
| hsa-miR-513b | ZNF627   | ZNF627   | -        |
| hsa-miR-513b | ZNF646   | ZNF646   | -        |
| hsa-miR-513b | ZNF648   | ZNF648   | -        |
| hsa-miR-513b | ZNF654   | ZNF654   | -        |
| hsa-miR-513b | ZNF655   | ZNF655   | -        |
| hsa-miR-513b | ZNF678   | ZNF678   | -        |
| hsa-miR-513b | ZNF680   | ZNF680   | -        |
| hsa-miR-513b | ZNF706   | ZNF706   | -        |
| hsa-miR-513b | ZNF740   | ZNF740   | -        |
| hsa-miR-513b | ZNF75D   | ZNF75D   | -        |
| hsa-miR-513b | ZNF761   | ZNF761   | -        |
| hsa-miR-513b | ZNF764   | ZNF764   | -        |
| hsa-miR-513b | ZNF778   | ZNF778   | -        |
| hsa-miR-513b | ZNF780A  | ZNF780A  | -        |
| hsa-miR-513b | ZNF783   | ZNF783   | -        |
| hsa-miR-513b | ZNF804A  | ZNF804A  | -        |
| hsa-miR-513b | ZNF814   | ZNF814   | -        |
| hsa-miR-513b | ZNF841   | ZNF841   | -        |
| hsa-miR-513b | ZNHIT6   | ZNHIT6   | -        |
| hsa-miR-513b | ZRANB2   | ZRANB2   | -        |
| hsa-miR-513b | ZSCAN18  | ZSCAN18  | -        |
| hsa-miR-513b | ZSWIM6   | ZSWIM6   | -        |
| hsa-miR-513b | ZYG11B   | ZYG11B   | -        |
| hsa-miR-513b | ZZZ3     | ZZZ3     | -        |
| hsa-miR-517c | -        | ABCA4    | ABCA4    |
| hsa-miR-517c | ADAM9    | ADAM9    | -        |
| hsa-miR-517c | -        | ADAMDEC1 | ADAMDEC1 |
| hsa-miR-517c | ADRBK2   | -        | ADRBK2   |
| hsa-miR-517c | AFAP1    | -        | AFAP1    |
| hsa-miR-517c | AKIRIN1  | AKIRIN1  | -        |
| hsa-miR-517c | ALCAM    | ALCAM    | -        |
| hsa-miR-517c | ANKRD29  | ANKRD29  | -        |
| hsa-miR-517c | APBB2    | APBB2    | -        |
| hsa-miR-517c | ARHGAP42 | ARHGAP42 | -        |
| hsa-miR-517c | ATRN     | ATRN     | -        |
| hsa-miR-517c | BDKRB2   | BDKRB2   | -        |
| hsa-miR-517c | BHLHE41  | BHLHE41  | -        |
| hsa-miR-517c | BSN      | BSN      | -        |
| hsa-miR-517c | BTLA     | BTLA     | -        |
| hsa-miR-517c | C10orf54 | C10orf54 | -        |
| hsa-miR-517c | C12orf74 | C12orf74 | -        |
| hsa-miR-517c | C17orf49 | -        | C17orf49 |
| hsa-miR-517c | C1orf173 | C1orf173 | -        |
| hsa-miR-517c | -        | C22orf34 | C22orf34 |
| hsa-miR-517c | C8orf80  | C8orf80  | -        |
| hsa-miR-517c | CACNG4   | CACNG4   | -        |
| hsa-miR-517c | -        | CCDC46   | CCDC46   |
| hsa-miR-517c | CCDC47   | CCDC47   | -        |

|              |          |          |          |
|--------------|----------|----------|----------|
| hsa-miR-517c | CDC42SE2 | CDC42SE2 | -        |
| hsa-miR-517c | -        | CDCA7L   | CDCA7L   |
| hsa-miR-517c | -        | CDK2AP1  | CDK2AP1  |
| hsa-miR-517c | CDS2     | CDS2     | -        |
| hsa-miR-517c | CFLAR    | CFLAR    | -        |
| hsa-miR-517c | CLIC4    | CLIC4    | -        |
| hsa-miR-517c | CSRNP2   | CSRNP2   | -        |
| hsa-miR-517c | CTDP1    | -        | CTDP1    |
| hsa-miR-517c | DACH2    | DACH2    | -        |
| hsa-miR-517c | -        | DEPDC5   | DEPDC5   |
| hsa-miR-517c | DGKH     | DGKH     | -        |
| hsa-miR-517c | DIP2A    | DIP2A    | -        |
| hsa-miR-517c | -        | DTNA     | DTNA     |
| hsa-miR-517c | EFNA5    | EFNA5    | -        |
| hsa-miR-517c | ELFN2    | ELFN2    | -        |
| hsa-miR-517c | ENPP6    | ENPP6    | -        |
| hsa-miR-517c | EPHA5    | EPHA5    | -        |
| hsa-miR-517c | -        | FAIM     | FAIM     |
| hsa-miR-517c | -        | FAM133B  | FAM133B  |
| hsa-miR-517c | FOXJ3    | FOXJ3    | -        |
| hsa-miR-517c | GFOD1    | GFOD1    | -        |
| hsa-miR-517c | GPR126   | GPR126   | -        |
| hsa-miR-517c | GPR64    | -        | GPR64    |
| hsa-miR-517c | HERPUD2  | HERPUD2  | -        |
| hsa-miR-517c | HFE      | HFE      | -        |
| hsa-miR-517c | HNRNPU   | HNRNPU   | -        |
| hsa-miR-517c | HPGDS    | HPGDS    | -        |
| hsa-miR-517c | -        | IGLL1    | IGLL1    |
| hsa-miR-517c | IL1A     | IL1A     | -        |
| hsa-miR-517c | INTS6    | INTS6    | -        |
| hsa-miR-517c | IRAK1    | -        | IRAK1    |
| hsa-miR-517c | IRF2BP2  | IRF2BP2  | -        |
| hsa-miR-517c | JPH1     | JPH1     | -        |
| hsa-miR-517c | JUN      | -        | JUN      |
| hsa-miR-517c | KCNH5    | KCNH5    | -        |
| hsa-miR-517c | KCNJ2    | KCNJ2    | -        |
| hsa-miR-517c | KCNS2    | KCNS2    | -        |
| hsa-miR-517c | KCTD14   | KCTD14   | -        |
| hsa-miR-517c | -        | KCTD8    | KCTD8    |
| hsa-miR-517c | -        | KIAA1751 | KIAA1751 |
| hsa-miR-517c | LARP1B   | LARP1B   | -        |
| hsa-miR-517c | LDB3     | LDB3     | -        |
| hsa-miR-517c | LDLR     | LDLR     | -        |
| hsa-miR-517c | LGALS13  | LGALS13  | -        |
| hsa-miR-517c | LGI2     | LGI2     | -        |
| hsa-miR-517c | LMLN     | -        | LMLN     |
| hsa-miR-517c | MAP3K14  | -        | MAP3K14  |
| hsa-miR-517c | MCHR2    | MCHR2    | -        |
| hsa-miR-517c | MFAP3    | MFAP3    | -        |
| hsa-miR-517c | -        | MGST1    | MGST1    |
| hsa-miR-517c | MSL1     | MSL1     | -        |

|              |         |         |         |
|--------------|---------|---------|---------|
| hsa-miR-517c | MYLK4   | MYLK4   | -       |
| hsa-miR-517c | NAIF1   | NAIF1   | -       |
| hsa-miR-517c | NCLN    | NCLN    | -       |
| hsa-miR-517c | NFIA    | NFIA    | -       |
| hsa-miR-517c | NPAS4   | NPAS4   | -       |
| hsa-miR-517c | NR1D2   | NR1D2   | -       |
| hsa-miR-517c | NUDCD3  | -       | NUDCD3  |
| hsa-miR-517c | OGT     | OGT     | -       |
| hsa-miR-517c | OLFM3   | OLFM3   | -       |
| hsa-miR-517c | OXTR    | OXTR    | -       |
| hsa-miR-517c | PAQR7   | PAQR7   | -       |
| hsa-miR-517c | -       | PCF11   | PCF11   |
| hsa-miR-517c | PHF13   | PHF13   | -       |
| hsa-miR-517c | -       | PIGA    | PIGA    |
| hsa-miR-517c | -       | PIP5K1B | PIP5K1B |
| hsa-miR-517c | POLR1B  | POLR1B  | -       |
| hsa-miR-517c | -       | PPIL5   | PPIL5   |
| hsa-miR-517c | PPP2R2C | PPP2R2C | -       |
| hsa-miR-517c | -       | PRKCZ   | PRKCZ   |
| hsa-miR-517c | PRMT1   | -       | PRMT1   |
| hsa-miR-517c | PRMT5   | PRMT5   | -       |
| hsa-miR-517c | PSKH1   | PSKH1   | -       |
| hsa-miR-517c | PTK2B   | PTK2B   | -       |
| hsa-miR-517c | RASGRF2 | RASGRF2 | -       |
| hsa-miR-517c | -       | RB1     | RB1     |
| hsa-miR-517c | RFK     | RFK     | -       |
| hsa-miR-517c | -       | RIF1    | RIF1    |
| hsa-miR-517c | RNF111  | RNF111  | -       |
| hsa-miR-517c | -       | RNF32   | RNF32   |
| hsa-miR-517c | RPRD1B  | RPRD1B  | -       |
| hsa-miR-517c | RSU1    | RSU1    | -       |
| hsa-miR-517c | RYBP    | RYBP    | -       |
| hsa-miR-517c | -       | SDF4    | SDF4    |
| hsa-miR-517c | SDR16C5 | SDR16C5 | -       |
| hsa-miR-517c | SEC11A  | SEC11A  | -       |
| hsa-miR-517c | SEMA3A  | SEMA3A  | -       |
| hsa-miR-517c | SERF1A  | SERF1A  | -       |
| hsa-miR-517c | SERF1B  | SERF1B  | -       |
| hsa-miR-517c | SF3B1   | SF3B1   | -       |
| hsa-miR-517c | SH3TC1  | -       | SH3TC1  |
| hsa-miR-517c | SLC26A1 | -       | SLC26A1 |
| hsa-miR-517c | SLC47A2 | SLC47A2 | -       |
| hsa-miR-517c | SLITRK1 | SLITRK1 | -       |
| hsa-miR-517c | SMG7    | SMG7    | -       |
| hsa-miR-517c | -       | SMYD3   | SMYD3   |
| hsa-miR-517c | SNX18   | SNX18   | -       |
| hsa-miR-517c | -       | SNX21   | SNX21   |
| hsa-miR-517c | SPATA2L | -       | SPATA2L |
| hsa-miR-517c | SPG7    | -       | SPG7    |
| hsa-miR-517c | -       | STK19   | STK19   |
| hsa-miR-517c | STK39   | STK39   | -       |

|              |          |          |        |
|--------------|----------|----------|--------|
| hsa-miR-517c | STXBP1   | STXBP1   | -      |
| hsa-miR-517c | SUDS3    | SUDS3    | -      |
| hsa-miR-517c | TET2     | TET2     | -      |
| hsa-miR-517c | TMCC1    | TMCC1    | -      |
| hsa-miR-517c | TMEM150C | TMEM150C | -      |
| hsa-miR-517c | TMEM30A  | TMEM30A  | -      |
| hsa-miR-517c | TMEM56   | TMEM56   | -      |
| hsa-miR-517c | TNKS     | TNKS     | -      |
| hsa-miR-517c | TNNI1    | -        | TNNI1  |
| hsa-miR-517c | TOMM5    | TOMM5    | -      |
| hsa-miR-517c | TP53TG3  | TP53TG3  | -      |
| hsa-miR-517c | TRIM35   | TRIM35   | -      |
| hsa-miR-517c | UBASH3B  | UBASH3B  | -      |
| hsa-miR-517c | UBR7     | UBR7     | -      |
| hsa-miR-517c | -        | USP7     | USP7   |
| hsa-miR-517c | VAMP2    | VAMP2    | -      |
| hsa-miR-517c | VSTM2B   | VSTM2B   | -      |
| hsa-miR-517c | WNT4     | WNT4     | -      |
| hsa-miR-517c | XYLT2    | -        | XYLT2  |
| hsa-miR-517c | ZEB2     | ZEB2     | -      |
| hsa-miR-517c | -        | ZNF614   | ZNF614 |
| hsa-miR-517c | ZNF783   | ZNF783   | -      |
| hsa-miR-517c | ZYG11B   | ZYG11B   | -      |
| hsa-miR-519e | AADACL3  | AADACL3  | -      |
| hsa-miR-519e | AARSD1   | AARSD1   | -      |
| hsa-miR-519e | ABCA1    | ABCA1    | -      |
| hsa-miR-519e | ABCC1    | ABCC1    | -      |
| hsa-miR-519e | ABHD10   | ABHD10   | -      |
| hsa-miR-519e | ABHD11   | -        | ABHD11 |
| hsa-miR-519e | ABHD5    | ABHD5    | -      |
| hsa-miR-519e | ABI1     | ABI1     | -      |
| hsa-miR-519e | ABL1     | -        | ABL1   |
| hsa-miR-519e | ACPL2    | ACPL2    | -      |
| hsa-miR-519e | ACSM2A   | ACSM2A   | -      |
| hsa-miR-519e | ADAM22   | ADAM22   | -      |
| hsa-miR-519e | ADAMTSL1 | ADAMTSL1 | -      |
| hsa-miR-519e | ADCY2    | ADCY2    | -      |
| hsa-miR-519e | ADCY6    | ADCY6    | -      |
| hsa-miR-519e | ADCYAP1  | ADCYAP1  | -      |
| hsa-miR-519e | ADD1     | -        | ADD1   |
| hsa-miR-519e | ADD2     | ADD2     | -      |
| hsa-miR-519e | AFF4     | AFF4     | -      |
| hsa-miR-519e | AGPAT4   | -        | AGPAT4 |
| hsa-miR-519e | AHCYL2   | AHCYL2   | -      |
| hsa-miR-519e | AKAP11   | AKAP11   | -      |
| hsa-miR-519e | AKAP13   | AKAP13   | -      |
| hsa-miR-519e | AKAP6    | AKAP6    | -      |
| hsa-miR-519e | ALDH1A3  | ALDH1A3  | -      |
| hsa-miR-519e | ALDH3A2  | ALDH3A2  | -      |
| hsa-miR-519e | ALG9     | ALG9     | -      |
| hsa-miR-519e | -        | ALPK1    | ALPK1  |

|              |           |           |          |
|--------------|-----------|-----------|----------|
| hsa-miR-519e | AMMECR1L  | AMMECR1L  | -        |
| hsa-miR-519e | ANAPC16   | ANAPC16   | -        |
| hsa-miR-519e | ANK3      | ANK3      | -        |
| hsa-miR-519e | ANKRD20A3 | ANKRD20A3 | -        |
| hsa-miR-519e | ANKRD28   | ANKRD28   | -        |
| hsa-miR-519e | -         | ANKRD46   | ANKRD46  |
| hsa-miR-519e | ANKRD6    | ANKRD6    | -        |
| hsa-miR-519e | ANKS6     | -         | ANKS6    |
| hsa-miR-519e | ANTXR1    | ANTXR1    | -        |
| hsa-miR-519e | ANXA10    | ANXA10    | -        |
| hsa-miR-519e | AP1G1     | AP1G1     | -        |
| hsa-miR-519e | -         | AP3S1     | AP3S1    |
| hsa-miR-519e | APBB2     | -         | APBB2    |
| hsa-miR-519e | APBB3     | APBB3     | -        |
| hsa-miR-519e | APC       | APC       | -        |
| hsa-miR-519e | APLP2     | APLP2     | -        |
| hsa-miR-519e | APPBP2    | APPBP2    | -        |
| hsa-miR-519e | AQP2      | AQP2      | -        |
| hsa-miR-519e | AQP9      | AQP9      | -        |
| hsa-miR-519e | ARCN1     | ARCN1     | -        |
| hsa-miR-519e | ARHGAP20  | ARHGAP20  | -        |
| hsa-miR-519e | ARHGEF12  | -         | ARHGEF12 |
| hsa-miR-519e | ARL1      | ARL1      | -        |
| hsa-miR-519e | ARL4A     | ARL4A     | -        |
| hsa-miR-519e | ARL4C     | ARL4C     | -        |
| hsa-miR-519e | ARMC8     | ARMC8     | -        |
| hsa-miR-519e | ARSB      | ARSB      | -        |
| hsa-miR-519e | ARSJ      | ARSJ      | -        |
| hsa-miR-519e | ASAP3     | ASAP3     | -        |
| hsa-miR-519e | ASB13     | ASB13     | -        |
| hsa-miR-519e | ASPH      | ASPH      | -        |
| hsa-miR-519e | ASPHD2    | ASPHD2    | -        |
| hsa-miR-519e | ATP1A2    | ATP1A2    | -        |
| hsa-miR-519e | -         | ATP1A4    | ATP1A4   |
| hsa-miR-519e | ATP2A2    | ATP2A2    | -        |
| hsa-miR-519e | ATP5G3    | ATP5G3    | -        |
| hsa-miR-519e | ATP6V1E1  | ATP6V1E1  | -        |
| hsa-miR-519e | ATP8B4    | ATP8B4    | -        |
| hsa-miR-519e | ATXN1     | -         | ATXN1    |
| hsa-miR-519e | -         | ATXN2     | ATXN2    |
| hsa-miR-519e | ATXN7     | ATXN7     | -        |
| hsa-miR-519e | AVPR1A    | AVPR1A    | -        |
| hsa-miR-519e | AXL       | AXL       | -        |
| hsa-miR-519e | B3GNT5    | B3GNT5    | -        |
| hsa-miR-519e | B3GNT9    | B3GNT9    | -        |
| hsa-miR-519e | BAZ1B     | BAZ1B     | -        |
| hsa-miR-519e | BBX       | BBX       | -        |
| hsa-miR-519e | BCL11B    | BCL11B    | -        |
| hsa-miR-519e | BEND4     | BEND4     | -        |
| hsa-miR-519e | BICD2     | BICD2     | -        |
| hsa-miR-519e | BMP3      | BMP3      | -        |

|              |           |           |          |
|--------------|-----------|-----------|----------|
| hsa-miR-519e | BMS1      | BMS1      | -        |
| hsa-miR-519e | BNC2      | -         | BNC2     |
| hsa-miR-519e | BPGM      | BPGM      | -        |
| hsa-miR-519e | BRD4      | BRD4      | -        |
| hsa-miR-519e | BSDC1     | BSDC1     | -        |
| hsa-miR-519e | BTAF1     | BTAF1     | -        |
| hsa-miR-519e | BTBD3     | BTBD3     | -        |
| hsa-miR-519e | C10orf140 | C10orf140 | -        |
| hsa-miR-519e | C10orf25  | C10orf25  | -        |
| hsa-miR-519e | C11orf34  | C11orf34  | -        |
| hsa-miR-519e | C11orf87  | C11orf87  | -        |
| hsa-miR-519e | C12orf74  | C12orf74  | -        |
| hsa-miR-519e | C12orf75  | C12orf75  | -        |
| hsa-miR-519e | C13orf31  | C13orf31  | -        |
| hsa-miR-519e | C13orf36  | C13orf36  | -        |
| hsa-miR-519e | C14orf79  | C14orf79  | -        |
| hsa-miR-519e | C15orf26  | C15orf26  | -        |
| hsa-miR-519e | C15orf52  | C15orf52  | -        |
| hsa-miR-519e | C15orf54  | C15orf54  | -        |
| hsa-miR-519e | C15orf62  | C15orf62  | -        |
| hsa-miR-519e | C16orf82  | C16orf82  | -        |
| hsa-miR-519e | C17orf100 | C17orf100 | -        |
| hsa-miR-519e | C17orf102 | C17orf102 | -        |
| hsa-miR-519e | C17orf70  | -         | C17orf70 |
| hsa-miR-519e | C19orf25  | -         | C19orf25 |
| hsa-miR-519e | C1QTNF2   | C1QTNF2   | -        |
| hsa-miR-519e | C1orf187  | C1orf187  | -        |
| hsa-miR-519e | C20orf112 | C20orf112 | -        |
| hsa-miR-519e | C20orf3   | C20orf3   | -        |
| hsa-miR-519e | C22orf25  | C22orf25  | -        |
| hsa-miR-519e | C2orf61   | C2orf61   | -        |
| hsa-miR-519e | C3orf27   | C3orf27   | -        |
| hsa-miR-519e | C3orf52   | C3orf52   | -        |
| hsa-miR-519e | C3orf67   | C3orf67   | -        |
| hsa-miR-519e | C4orf19   | C4orf19   | -        |
| hsa-miR-519e | C5orf43   | C5orf43   | -        |
| hsa-miR-519e | C5orf45   | C5orf45   | -        |
| hsa-miR-519e | C6orf222  | C6orf222  | -        |
| hsa-miR-519e | C8orf46   | C8orf46   | -        |
| hsa-miR-519e | C8orf59   | C8orf59   | -        |
| hsa-miR-519e | C8orf84   | C8orf84   | -        |
| hsa-miR-519e | C8orf85   | C8orf85   | -        |
| hsa-miR-519e | C9orf106  | C9orf106  | -        |
| hsa-miR-519e | C9orf125  | C9orf125  | -        |
| hsa-miR-519e | C9orf86   | -         | C9orf86  |
| hsa-miR-519e | CAB39     | CAB39     | -        |
| hsa-miR-519e | CACNB4    | CACNB4    | -        |
| hsa-miR-519e | CACNG8    | -         | CACNG8   |
| hsa-miR-519e | CADM1     | CADM1     | -        |
| hsa-miR-519e | CAPN1     | CAPN1     | -        |
| hsa-miR-519e | CAPN7     | CAPN7     | -        |

|              |            |            |          |
|--------------|------------|------------|----------|
| hsa-miR-519e | CAPRIN1    | CAPRIN1    | -        |
| hsa-miR-519e | CARD8      | CARD8      | -        |
| hsa-miR-519e | CASC3      | CASC3      | -        |
| hsa-miR-519e | CASQ2      | CASQ2      | -        |
| hsa-miR-519e | CBLL1      | CBLL1      | -        |
| hsa-miR-519e | CCDC113    | CCDC113    | -        |
| hsa-miR-519e | CCDC25     | CCDC25     | -        |
| hsa-miR-519e | -          | CCDC36     | CCDC36   |
| hsa-miR-519e | CCL22      | CCL22      | -        |
| hsa-miR-519e | CCNE2      | CCNE2      | -        |
| hsa-miR-519e | CCNT2      | CCNT2      | -        |
| hsa-miR-519e | CD22       | -          | CD22     |
| hsa-miR-519e | CD2BP2     | -          | CD2BP2   |
| hsa-miR-519e | CD80       | CD80       | -        |
| hsa-miR-519e | -          | CD9        | CD9      |
| hsa-miR-519e | CDC42SE1   | CDC42SE1   | -        |
| hsa-miR-519e | CDKN1C     | CDKN1C     | -        |
| hsa-miR-519e | CENPF      | CENPF      | -        |
| hsa-miR-519e | CES2       | CES2       | -        |
| hsa-miR-519e | CFTR       | CFTR       | -        |
| hsa-miR-519e | CHD7       | CHD7       | -        |
| hsa-miR-519e | CHRM2      | CHRM2      | -        |
| hsa-miR-519e | CHST11     | CHST11     | -        |
| hsa-miR-519e | CHTF8      | CHTF8      | -        |
| hsa-miR-519e | CISD3      | CISD3      | -        |
| hsa-miR-519e | CLEC12B    | CLEC12B    | -        |
| hsa-miR-519e | CLEC2B     | CLEC2B     | -        |
| hsa-miR-519e | CLIC2      | CLIC2      | -        |
| hsa-miR-519e | -          | CLK4       | CLK4     |
| hsa-miR-519e | CLLU1      | CLLU1      | -        |
| hsa-miR-519e | CLOCK      | CLOCK      | -        |
| hsa-miR-519e | CNTNAP2    | -          | CNTNAP2  |
| hsa-miR-519e | COL4A3     | COL4A3     | -        |
| hsa-miR-519e | COMMD7     | -          | COMMD7   |
| hsa-miR-519e | COMMD9     | COMMD9     | -        |
| hsa-miR-519e | CORO1C     | -          | CORO1C   |
| hsa-miR-519e | CPNE9      | -          | CPNE9    |
| hsa-miR-519e | CRTAP      | CRTAP      | -        |
| hsa-miR-519e | CS         | CS         | -        |
| hsa-miR-519e | CSGALNACT1 | CSGALNACT1 | -        |
| hsa-miR-519e | CSRNP3     | CSRNP3     | -        |
| hsa-miR-519e | CSRP2BP    | CSRP2BP    | -        |
| hsa-miR-519e | CWF19L1    | CWF19L1    | -        |
| hsa-miR-519e | CXADR      | CXADR      | -        |
| hsa-miR-519e | CXCL10     | -          | CXCL10   |
| hsa-miR-519e | CXCL12     | CXCL12     | -        |
| hsa-miR-519e | CXCL16     | CXCL16     | -        |
| hsa-miR-519e | CXCR1      | CXCR1      | -        |
| hsa-miR-519e | CXorf23    | CXorf23    | -        |
| hsa-miR-519e | CYB561D1   | CYB561D1   | -        |
| hsa-miR-519e | CYB561D2   | -          | CYB561D2 |



|              |         |         |        |
|--------------|---------|---------|--------|
| hsa-miR-519e | CYLD    | CYLD    | -      |
| hsa-miR-519e | CYP2W1  | -       | CYP2W1 |
| hsa-miR-519e | CYSLTR2 | CYSLTR2 | -      |
| hsa-miR-519e | CYTH1   | CYTH1   | -      |
| hsa-miR-519e | DAK     | -       | DAK    |
| hsa-miR-519e | -       | DBC1    | DBC1   |
| hsa-miR-519e | DCAF12  | DCAF12  | -      |
| hsa-miR-519e | DCAF17  | DCAF17  | -      |
| hsa-miR-519e | DCAF5   | DCAF5   | -      |
| hsa-miR-519e | DCTN4   | DCTN4   | -      |
| hsa-miR-519e | DCUN1D1 | DCUN1D1 | -      |
| hsa-miR-519e | DCUN1D3 | DCUN1D3 | -      |
| hsa-miR-519e | DDN     | -       | DDN    |
| hsa-miR-519e | DDX3Y   | DDX3Y   | -      |
| hsa-miR-519e | DHX33   | DHX33   | -      |
| hsa-miR-519e | DICER1  | DICER1  | -      |
| hsa-miR-519e | DIDO1   | -       | DIDO1  |
| hsa-miR-519e | DIRC2   | DIRC2   | -      |
| hsa-miR-519e | DIS3    | DIS3    | -      |
| hsa-miR-519e | DMP1    | DMP1    | -      |
| hsa-miR-519e | DNAJB4  | DNAJB4  | -      |
| hsa-miR-519e | DNAJC11 | DNAJC11 | -      |
| hsa-miR-519e | DNAJC16 | DNAJC16 | -      |
| hsa-miR-519e | DNALI1  | DNALI1  | -      |
| hsa-miR-519e | DNHD1   | DNHD1   | -      |
| hsa-miR-519e | DOCK3   | DOCK3   | -      |
| hsa-miR-519e | DOK3    | -       | DOK3   |
| hsa-miR-519e | DPF3    | DPF3    | -      |
| hsa-miR-519e | DPH3    | DPH3    | -      |
| hsa-miR-519e | DPP9    | -       | DPP9   |
| hsa-miR-519e | DSC2    | DSC2    | -      |
| hsa-miR-519e | DSCR3   | DSCR3   | -      |
| hsa-miR-519e | DTX4    | DTX4    | -      |
| hsa-miR-519e | DUSP26  | DUSP26  | -      |
| hsa-miR-519e | DUSP3   | DUSP3   | -      |
| hsa-miR-519e | DYRK1A  | DYRK1A  | -      |
| hsa-miR-519e | DYRK2   | DYRK2   | -      |
| hsa-miR-519e | E2F3    | E2F3    | -      |
| hsa-miR-519e | ECHDC2  | -       | ECHDC2 |
| hsa-miR-519e | EEFSEC  | -       | EEFSEC |
| hsa-miR-519e | EEPD1   | EEPD1   | -      |
| hsa-miR-519e | EFHC1   | -       | EFHC1  |
| hsa-miR-519e | EFNA1   | EFNA1   | -      |
| hsa-miR-519e | EGFLAM  | EGFLAM  | -      |
| hsa-miR-519e | EHD2    | EHD2    | -      |
| hsa-miR-519e | EHD3    | EHD3    | -      |
| hsa-miR-519e | EIF2C1  | EIF2C1  | -      |
| hsa-miR-519e | EIF2S3  | EIF2S3  | -      |
| hsa-miR-519e | ELF5    | ELF5    | -      |
| hsa-miR-519e | ELOVL2  | ELOVL2  | -      |
| hsa-miR-519e | EMILIN3 | EMILIN3 | -      |

|              |          |          |        |
|--------------|----------|----------|--------|
| hsa-miR-519e | EPB41    | EPB41    | -      |
| hsa-miR-519e | EPHA3    | EPHA3    | -      |
| hsa-miR-519e | EPHA7    | EPHA7    | -      |
| hsa-miR-519e | ERAP1    | ERAP1    | -      |
| hsa-miR-519e | ERBB3    | ERBB3    | -      |
| hsa-miR-519e | ERI3     | ERI3     | -      |
| hsa-miR-519e | -        | ERP27    | ERP27  |
| hsa-miR-519e | ESCO2    | ESCO2    | -      |
| hsa-miR-519e | ETV3L    | ETV3L    | -      |
| hsa-miR-519e | EXOSC1   | EXOSC1   | -      |
| hsa-miR-519e | EYS      | EYS      | -      |
| hsa-miR-519e | F2R      | F2R      | -      |
| hsa-miR-519e | FAM104A  | FAM104A  | -      |
| hsa-miR-519e | FAM110B  | FAM110B  | -      |
| hsa-miR-519e | FAM122B  | FAM122B  | -      |
| hsa-miR-519e | FAM134A  | FAM134A  | -      |
| hsa-miR-519e | FAM13A   | FAM13A   | -      |
| hsa-miR-519e | FAM13B   | FAM13B   | -      |
| hsa-miR-519e | FAM188A  | FAM188A  | -      |
| hsa-miR-519e | FAM26E   | FAM26E   | -      |
| hsa-miR-519e | FAM40B   | FAM40B   | -      |
| hsa-miR-519e | -        | FAM48A   | FAM48A |
| hsa-miR-519e | FAM65A   | -        | FAM65A |
| hsa-miR-519e | FAM75C1  | FAM75C1  | -      |
| hsa-miR-519e | FAT3     | FAT3     | -      |
| hsa-miR-519e | FBN2     | FBN2     | -      |
| hsa-miR-519e | FBXL3    | FBXL3    | -      |
| hsa-miR-519e | -        | FBXO18   | FBXO18 |
| hsa-miR-519e | FBXO21   | FBXO21   | -      |
| hsa-miR-519e | FCRL1    | FCRL1    | -      |
| hsa-miR-519e | FER1L6   | FER1L6   | -      |
| hsa-miR-519e | FEZ2     | FEZ2     | -      |
| hsa-miR-519e | FGFBP3   | FGFBP3   | -      |
| hsa-miR-519e | FGFR1    | FGFR1    | -      |
| hsa-miR-519e | FLJ44635 | FLJ44635 | -      |
| hsa-miR-519e | FMN1     | FMN1     | -      |
| hsa-miR-519e | FNBP1L   | FNBP1L   | -      |
| hsa-miR-519e | FNTB     | FNTB     | -      |
| hsa-miR-519e | FOXD1    | FOXD1    | -      |
| hsa-miR-519e | FOXF1    | FOXF1    | -      |
| hsa-miR-519e | FOXK2    | FOXK2    | -      |
| hsa-miR-519e | FRAS1    | FRAS1    | -      |
| hsa-miR-519e | FRMD4B   | FRMD4B   | -      |
| hsa-miR-519e | FRYL     | FRYL     | -      |
| hsa-miR-519e | FTSJD1   | FTSJD1   | -      |
| hsa-miR-519e | GAA      | -        | GAA    |
| hsa-miR-519e | GAB3     | GAB3     | -      |
| hsa-miR-519e | GABBR2   | GABBR2   | -      |
| hsa-miR-519e | GABPB1   | GABPB1   | -      |
| hsa-miR-519e | GABRB3   | GABRB3   | -      |
| hsa-miR-519e | GABRE    | GABRE    | -      |

|              |          |          |        |
|--------------|----------|----------|--------|
| hsa-miR-519e | GALR1    | GALR1    | -      |
| hsa-miR-519e | GAPT     | GAPT     | -      |
| hsa-miR-519e | GATAD2B  | GATAD2B  | -      |
| hsa-miR-519e | GBA      | -        | GBA    |
| hsa-miR-519e | GCLC     | GCLC     | -      |
| hsa-miR-519e | GDAP1    | GDAP1    | -      |
| hsa-miR-519e | GEMIN7   | GEMIN7   | -      |
| hsa-miR-519e | GFOD1    | GFOD1    | -      |
| hsa-miR-519e | GIGYF1   | GIGYF1   | -      |
| hsa-miR-519e | GIMAP6   | GIMAP6   | -      |
| hsa-miR-519e | GINS1    | GINS1    | -      |
| hsa-miR-519e | GINS4    | GINS4    | -      |
| hsa-miR-519e | GJA3     | GJA3     | -      |
| hsa-miR-519e | GJA4     | GJA4     | -      |
| hsa-miR-519e | GJC1     | GJC1     | -      |
| hsa-miR-519e | GLT25D1  | GLT25D1  | -      |
| hsa-miR-519e | GMPR2    | GMPR2    | -      |
| hsa-miR-519e | GNMT     | -        | GNMT   |
| hsa-miR-519e | GPR137C  | GPR137C  | -      |
| hsa-miR-519e | GPR155   | GPR155   | -      |
| hsa-miR-519e | GPR39    | GPR39    | -      |
| hsa-miR-519e | GPR44    | GPR44    | -      |
| hsa-miR-519e | GREM1    | GREM1    | -      |
| hsa-miR-519e | GRIA1    | GRIA1    | -      |
| hsa-miR-519e | GRIA3    | GRIA3    | -      |
| hsa-miR-519e | GSTK1    | GSTK1    | -      |
| hsa-miR-519e | -        | GTF3C4   | GTF3C4 |
| hsa-miR-519e | H2AFJ    | -        | H2AFJ  |
| hsa-miR-519e | HAND2    | HAND2    | -      |
| hsa-miR-519e | HAUS4    | HAUS4    | -      |
| hsa-miR-519e | -        | HDAC8    | HDAC8  |
| hsa-miR-519e | HDAC9    | HDAC9    | -      |
| hsa-miR-519e | HDDC2    | HDDC2    | -      |
| hsa-miR-519e | HEPACAM  | HEPACAM  | -      |
| hsa-miR-519e | HLA-DQB2 | HLA-DQB2 | -      |
| hsa-miR-519e | HLX      | HLX      | -      |
| hsa-miR-519e | HMGB3    | HMGB3    | -      |
| hsa-miR-519e | HOXB1    | -        | HOXB1  |
| hsa-miR-519e | -        | HOXB2    | HOXB2  |
| hsa-miR-519e | HPCAL4   | HPCAL4   | -      |
| hsa-miR-519e | -        | HS3ST1   | HS3ST1 |
| hsa-miR-519e | HSF5     | HSF5     | -      |
| hsa-miR-519e | HSP90AA1 | HSP90AA1 | -      |
| hsa-miR-519e | HSPC159  | HSPC159  | -      |
| hsa-miR-519e | HTR5A    | HTR5A    | -      |
| hsa-miR-519e | HTR7     | HTR7     | -      |
| hsa-miR-519e | HTRA3    | -        | HTRA3  |
| hsa-miR-519e | ID1      | -        | ID1    |
| hsa-miR-519e | IFITM5   | -        | IFITM5 |
| hsa-miR-519e | IFNA10   | IFNA10   | -      |
| hsa-miR-519e | IFNA2    | IFNA2    | -      |

|              |           |           |          |
|--------------|-----------|-----------|----------|
| hsa-miR-519e | IFRD2     | -         | IFRD2    |
| hsa-miR-519e | IGDCC4    | IGDCC4    | -        |
| hsa-miR-519e | IGSF1     | IGSF1     | -        |
| hsa-miR-519e | IGSF10    | -         | IGSF10   |
| hsa-miR-519e | IKZF1     | -         | IKZF1    |
| hsa-miR-519e | IL17RD    | IL17RD    | -        |
| hsa-miR-519e | IL1RL1    | -         | IL1RL1   |
| hsa-miR-519e | IL28RA    | IL28RA    | -        |
| hsa-miR-519e | IMPAD1    | IMPAD1    | -        |
| hsa-miR-519e | IMPG1     | IMPG1     | -        |
| hsa-miR-519e | IRF2BP2   | IRF2BP2   | -        |
| hsa-miR-519e | ISLR      | ISLR      | -        |
| hsa-miR-519e | ITGA2     | -         | ITGA2    |
| hsa-miR-519e | ITIH5     | ITIH5     | -        |
| hsa-miR-519e | ITPR2     | ITPR2     | -        |
| hsa-miR-519e | JAK1      | JAK1      | -        |
| hsa-miR-519e | -         | JAM2      | JAM2     |
| hsa-miR-519e | JPH4      | JPH4      | -        |
| hsa-miR-519e | KCNA1     | KCNA1     | -        |
| hsa-miR-519e | KCNAB2    | -         | KCNAB2   |
| hsa-miR-519e | KCNC2     | KCNC2     | -        |
| hsa-miR-519e | KCNJ11    | KCNJ11    | -        |
| hsa-miR-519e | KCNJ13    | KCNJ13    | -        |
| hsa-miR-519e | KCNK2     | KCNK2     | -        |
| hsa-miR-519e | KCTD2     | KCTD2     | -        |
| hsa-miR-519e | KDM1B     | KDM1B     | -        |
| hsa-miR-519e | KIAA1024  | KIAA1024  | -        |
| hsa-miR-519e | KIAA1045  | KIAA1045  | -        |
| hsa-miR-519e | KIAA1432  | KIAA1432  | -        |
| hsa-miR-519e | KIAA1683  | -         | KIAA1683 |
| hsa-miR-519e | KIAA1841  | KIAA1841  | -        |
| hsa-miR-519e | KIF14     | KIF14     | -        |
| hsa-miR-519e | KIF1B     | KIF1B     | -        |
| hsa-miR-519e | KIT       | KIT       | -        |
| hsa-miR-519e | KL        | KL        | -        |
| hsa-miR-519e | KLC4      | KLC4      | -        |
| hsa-miR-519e | KLF13     | KLF13     | -        |
| hsa-miR-519e | KLHL6     | -         | KLHL6    |
| hsa-miR-519e | KLK10     | KLK10     | -        |
| hsa-miR-519e | KLK3      | -         | KLK3     |
| hsa-miR-519e | KRTAP20-3 | KRTAP20-3 | -        |
| hsa-miR-519e | KY        | KY        | -        |
| hsa-miR-519e | LAMC2     | LAMC2     | -        |
| hsa-miR-519e | LARP4B    | LARP4B    | -        |
| hsa-miR-519e | LARS2     | LARS2     | -        |
| hsa-miR-519e | LDB3      | LDB3      | -        |
| hsa-miR-519e | LDLRAD2   | LDLRAD2   | -        |
| hsa-miR-519e | -         | LHFPL1    | LHFPL1   |
| hsa-miR-519e | LHX6      | LHX6      | -        |
| hsa-miR-519e | LMBR1     | LMBR1     | -        |
| hsa-miR-519e | LMO2      | LMO2      | -        |

|              |           |           |        |
|--------------|-----------|-----------|--------|
| hsa-miR-519e | LMOD3     | LMOD3     | -      |
| hsa-miR-519e | LMX1B     | -         | LMX1B  |
| hsa-miR-519e | LOC147670 | LOC147670 | -      |
| hsa-miR-519e | LOC390595 | LOC390595 | -      |
| hsa-miR-519e | LPCAT2    | LPCAT2    | -      |
| hsa-miR-519e | LRCH1     | LRCH1     | -      |
| hsa-miR-519e | LRRC55    | LRRC55    | -      |
| hsa-miR-519e | LRRC68    | LRRC68    | -      |
| hsa-miR-519e | LRRC8A    | LRRC8A    | -      |
| hsa-miR-519e | LSM12     | LSM12     | -      |
| hsa-miR-519e | LTK       | -         | LTK    |
| hsa-miR-519e | LYPD6     | LYPD6     | -      |
| hsa-miR-519e | LYRM2     | LYRM2     | -      |
| hsa-miR-519e | MACC1     | MACC1     | -      |
| hsa-miR-519e | MAP7D3    | MAP7D3    | -      |
| hsa-miR-519e | MAPK1IP1L | MAPK1IP1L | -      |
| hsa-miR-519e | MAPK6     | MAPK6     | -      |
| hsa-miR-519e | MBL2      | MBL2      | -      |
| hsa-miR-519e | MBLAC2    | MBLAC2    | -      |
| hsa-miR-519e | MBOAT2    | MBOAT2    | -      |
| hsa-miR-519e | MCF2L     | MCF2L     | -      |
| hsa-miR-519e | MDGA2     | MDGA2     | -      |
| hsa-miR-519e | MEF2A     | -         | MEF2A  |
| hsa-miR-519e | MEGF8     | MEGF8     | -      |
| hsa-miR-519e | METTL7B   | METTL7B   | -      |
| hsa-miR-519e | MFGE8     | MFGE8     | -      |
| hsa-miR-519e | MGA       | MGA       | -      |
| hsa-miR-519e | MGAT4A    | -         | MGAT4A |
| hsa-miR-519e | -         | MICA      | MICA   |
| hsa-miR-519e | MKL2      | MKL2      | -      |
| hsa-miR-519e | MKRN1     | MKRN1     | -      |
| hsa-miR-519e | MLC1      | MLC1      | -      |
| hsa-miR-519e | MLL5      | MLL5      | -      |
| hsa-miR-519e | MLLT6     | MLLT6     | -      |
| hsa-miR-519e | MMACHC    | MMACHC    | -      |
| hsa-miR-519e | MMP19     | MMP19     | -      |
| hsa-miR-519e | -         | MMP3      | MMP3   |
| hsa-miR-519e | MOBKL2C   | MOBKL2C   | -      |
| hsa-miR-519e | MOBKL3    | MOBKL3    | -      |
| hsa-miR-519e | MOCS1     | MOCS1     | -      |
| hsa-miR-519e | MORF4L1   | MORF4L1   | -      |
| hsa-miR-519e | MORN4     | MORN4     | -      |
| hsa-miR-519e | MRAP      | -         | MRAP   |
| hsa-miR-519e | MRAS      | MRAS      | -      |
| hsa-miR-519e | MRPL22    | MRPL22    | -      |
| hsa-miR-519e | MRS2      | MRS2      | -      |
| hsa-miR-519e | MSR1      | MSR1      | -      |
| hsa-miR-519e | MTCH2     | MTCH2     | -      |
| hsa-miR-519e | MTCP1     | MTCP1     | -      |
| hsa-miR-519e | MTDH      | MTDH      | -      |
| hsa-miR-519e | MTMR4     | MTMR4     | -      |

|              |          |          |          |
|--------------|----------|----------|----------|
| hsa-miR-519e | MTR      | MTR      | -        |
| hsa-miR-519e | MTRF1L   | MTRF1L   | -        |
| hsa-miR-519e | MUDENG   | MUDENG   | -        |
| hsa-miR-519e | MYO1B    | MYO1B    | -        |
| hsa-miR-519e | MYO1E    | MYO1E    | -        |
| hsa-miR-519e | MYO3A    | -        | MYO3A    |
| hsa-miR-519e | MYO5A    | MYO5A    | -        |
| hsa-miR-519e | MYO6     | MYO6     | -        |
| hsa-miR-519e | MYOCD    | MYOCD    | -        |
| hsa-miR-519e | NAA30    | NAA30    | -        |
| hsa-miR-519e | NAALADL1 | -        | NAALADL1 |
| hsa-miR-519e | NAMPT    | NAMPT    | -        |
| hsa-miR-519e | NAPEPLD  | NAPEPLD  | -        |
| hsa-miR-519e | NAV1     | NAV1     | -        |
| hsa-miR-519e | NCAM1    | NCAM1    | -        |
| hsa-miR-519e | NEDD4L   | NEDD4L   | -        |
| hsa-miR-519e | NELF     | -        | NELF     |
| hsa-miR-519e | NIN      | NIN      | -        |
| hsa-miR-519e | NINJ1    | NINJ1    | -        |
| hsa-miR-519e | NLE1     | NLE1     | -        |
| hsa-miR-519e | NMNAT2   | NMNAT2   | -        |
| hsa-miR-519e | NOTCH4   | NOTCH4   | -        |
| hsa-miR-519e | NPAS2    | NPAS2    | -        |
| hsa-miR-519e | NPM1     | NPM1     | -        |
| hsa-miR-519e | NR1D2    | NR1D2    | -        |
| hsa-miR-519e | NR3C1    | NR3C1    | -        |
| hsa-miR-519e | NR4A2    | NR4A2    | -        |
| hsa-miR-519e | NSUN4    | NSUN4    | -        |
| hsa-miR-519e | NT5C1B   | NT5C1B   | -        |
| hsa-miR-519e | NT5C3L   | -        | NT5C3L   |
| hsa-miR-519e | NTM      | NTM      | -        |
| hsa-miR-519e | NUB1     | NUB1     | -        |
| hsa-miR-519e | NUBP1    | -        | NUBP1    |
| hsa-miR-519e | NUBPL    | NUBPL    | -        |
| hsa-miR-519e | NUFIP2   | NUFIP2   | -        |
| hsa-miR-519e | NUP98    | NUP98    | -        |
| hsa-miR-519e | NUTF2    | NUTF2    | -        |
| hsa-miR-519e | OAS2     | OAS2     | -        |
| hsa-miR-519e | -        | OAZ2     | OAZ2     |
| hsa-miR-519e | OBFC2A   | OBFC2A   | -        |
| hsa-miR-519e | ODZ3     | ODZ3     | -        |
| hsa-miR-519e | OR7D2    | OR7D2    | -        |
| hsa-miR-519e | OR9Q1    | OR9Q1    | -        |
| hsa-miR-519e | ORMDL2   | ORMDL2   | -        |
| hsa-miR-519e | P2RY11   | -        | P2RY11   |
| hsa-miR-519e | PAFAH1B1 | PAFAH1B1 | -        |
| hsa-miR-519e | PAFAH1B2 | PAFAH1B2 | -        |
| hsa-miR-519e | PANK3    | PANK3    | -        |
| hsa-miR-519e | PAPOLB   | PAPOLB   | -        |
| hsa-miR-519e | PAPSS2   | PAPSS2   | -        |
| hsa-miR-519e | PARM1    | PARM1    | -        |

|              |          |          |          |
|--------------|----------|----------|----------|
| hsa-miR-519e | PBOV1    | PBOV1    | -        |
| hsa-miR-519e | PBX1     | PBX1     | -        |
| hsa-miR-519e | PCDH18   | PCDH18   | -        |
| hsa-miR-519e | PCDHAC1  | PCDHAC1  | -        |
| hsa-miR-519e | PCSK4    | -        | PCSK4    |
| hsa-miR-519e | PCYOX1   | PCYOX1   | -        |
| hsa-miR-519e | PDCD6IP  | PDCD6IP  | -        |
| hsa-miR-519e | PDE1B    | PDE1B    | -        |
| hsa-miR-519e | PDE5A    | PDE5A    | -        |
| hsa-miR-519e | PDE8B    | PDE8B    | -        |
| hsa-miR-519e | PDPN     | PDPN     | -        |
| hsa-miR-519e | PDRG1    | PDRG1    | -        |
| hsa-miR-519e | PDYN     | PDYN     | -        |
| hsa-miR-519e | PEAR1    | PEAR1    | -        |
| hsa-miR-519e | PEX19    | PEX19    | -        |
| hsa-miR-519e | PFKFB4   | PFKFB4   | -        |
| hsa-miR-519e | PFN2     | PFN2     | -        |
| hsa-miR-519e | PHACTR1  | -        | PHACTR1  |
| hsa-miR-519e | PHC1     | PHC1     | -        |
| hsa-miR-519e | PHF20L1  | PHF20L1  | -        |
| hsa-miR-519e | PI4KB    | PI4KB    | -        |
| hsa-miR-519e | PIGA     | PIGA     | -        |
| hsa-miR-519e | -        | PIGT     | PIGT     |
| hsa-miR-519e | PINK1    | -        | PINK1    |
| hsa-miR-519e | PITX2    | PITX2    | -        |
| hsa-miR-519e | PKD1L1   | PKD1L1   | -        |
| hsa-miR-519e | PKIB     | PKIB     | -        |
| hsa-miR-519e | PLA2G12A | PLA2G12A | -        |
| hsa-miR-519e | PLAT     | PLAT     | -        |
| hsa-miR-519e | PLBD1    | PLBD1    | -        |
| hsa-miR-519e | PLCB2    | PLCB2    | -        |
| hsa-miR-519e | PLCG1    | PLCG1    | -        |
| hsa-miR-519e | PLD1     | PLD1     | -        |
| hsa-miR-519e | PLEKHF2  | PLEKHF2  | -        |
| hsa-miR-519e | PLN      | PLN      | -        |
| hsa-miR-519e | PLXNB3   | -        | PLXNB3   |
| hsa-miR-519e | PNLIPRP3 | PNLIPRP3 | -        |
| hsa-miR-519e | PNPLA4   | PNPLA4   | -        |
| hsa-miR-519e | POF1B    | POF1B    | -        |
| hsa-miR-519e | PPFIA1   | PPFIA1   | -        |
| hsa-miR-519e | PPIL6    | PPIL6    | -        |
| hsa-miR-519e | PPM1A    | PPM1A    | -        |
| hsa-miR-519e | PRAMEF1  | PRAMEF1  | -        |
| hsa-miR-519e | PRAMEF16 | PRAMEF16 | -        |
| hsa-miR-519e | PRAMEF17 | PRAMEF17 | -        |
| hsa-miR-519e | PRAMEF19 | -        | PRAMEF19 |
| hsa-miR-519e | PRAMEF3  | -        | PRAMEF3  |
| hsa-miR-519e | PRDM2    | PRDM2    | -        |
| hsa-miR-519e | PRDX6    | PRDX6    | -        |
| hsa-miR-519e | PRKAB1   | PRKAB1   | -        |
| hsa-miR-519e | PRKAR1A  | PRKAR1A  | -        |

|              |         |         |         |
|--------------|---------|---------|---------|
| hsa-miR-519e | PRKCH   | PRKCH   | -       |
| hsa-miR-519e | PRKCI   | PRKCI   | -       |
| hsa-miR-519e | PRKD3   | PRKD3   | -       |
| hsa-miR-519e | PRLR    | PRLR    | -       |
| hsa-miR-519e | PRPF40A | PRPF40A | -       |
| hsa-miR-519e | PRR15L  | PRR15L  | -       |
| hsa-miR-519e | PRSS23  | PRSS23  | -       |
| hsa-miR-519e | PRSS33  | -       | PRSS33  |
| hsa-miR-519e | PRUNE   | PRUNE   | -       |
| hsa-miR-519e | PSCA    | -       | PSCA    |
| hsa-miR-519e | -       | PTCHD1  | PTCHD1  |
| hsa-miR-519e | PTGER3  | PTGER3  | -       |
| hsa-miR-519e | PTGR2   | PTGR2   | -       |
| hsa-miR-519e | PTPLB   | PTPLB   | -       |
| hsa-miR-519e | PTPRB   | PTPRB   | -       |
| hsa-miR-519e | PTPRG   | PTPRG   | -       |
| hsa-miR-519e | QKI     | QKI     | -       |
| hsa-miR-519e | RAB21   | RAB21   | -       |
| hsa-miR-519e | RAB30   | RAB30   | -       |
| hsa-miR-519e | RAB40B  | RAB40B  | -       |
| hsa-miR-519e | RAB4A   | RAB4A   | -       |
| hsa-miR-519e | RAB6B   | RAB6B   | -       |
| hsa-miR-519e | RAB7L1  | RAB7L1  | -       |
| hsa-miR-519e | RABGAP1 | RABGAP1 | -       |
| hsa-miR-519e | RAI14   | RAI14   | -       |
| hsa-miR-519e | -       | RAI2    | RAI2    |
| hsa-miR-519e | RALGDS  | RALGDS  | -       |
| hsa-miR-519e | RAPGEF3 | -       | RAPGEF3 |
| hsa-miR-519e | RASSF2  | -       | RASSF2  |
| hsa-miR-519e | RBM12B  | RBM12B  | -       |
| hsa-miR-519e | RCBTB2  | RCBTB2  | -       |
| hsa-miR-519e | RCC1    | RCC1    | -       |
| hsa-miR-519e | RGS12   | -       | RGS12   |
| hsa-miR-519e | RGS7BP  | RGS7BP  | -       |
| hsa-miR-519e | RGS9BP  | RGS9BP  | -       |
| hsa-miR-519e | RHD     | RHD     | -       |
| hsa-miR-519e | RHOBTB3 | RHOBTB3 | -       |
| hsa-miR-519e | RHOV    | RHOV    | -       |
| hsa-miR-519e | RIT1    | RIT1    | -       |
| hsa-miR-519e | RND1    | RND1    | -       |
| hsa-miR-519e | RNF11   | RNF11   | -       |
| hsa-miR-519e | RNF125  | RNF125  | -       |
| hsa-miR-519e | RNF144B | RNF144B | -       |
| hsa-miR-519e | RNF170  | RNF170  | -       |
| hsa-miR-519e | RNF43   | RNF43   | -       |
| hsa-miR-519e | RNPEP   | -       | RNPEP   |
| hsa-miR-519e | ROBO4   | ROBO4   | -       |
| hsa-miR-519e | ROCK2   | ROCK2   | -       |
| hsa-miR-519e | ROD1    | ROD1    | -       |
| hsa-miR-519e | RP2     | RP2     | -       |
| hsa-miR-519e | RPF1    | RPF1    | -       |



|              |           |           |          |
|--------------|-----------|-----------|----------|
| hsa-miR-519e | RPRD1B    | RPRD1B    | -        |
| hsa-miR-519e | RPS6KA3   | RPS6KA3   | -        |
| hsa-miR-519e | -         | RTCD1     | RTCD1    |
| hsa-miR-519e | SAMD12    | SAMD12    | -        |
| hsa-miR-519e | SAMD5     | SAMD5     | -        |
| hsa-miR-519e | SC5DL     | SC5DL     | -        |
| hsa-miR-519e | SCARB1    | SCARB1    | -        |
| hsa-miR-519e | SCARF2    | -         | SCARF2   |
| hsa-miR-519e | SCN3B     | SCN3B     | -        |
| hsa-miR-519e | SCN9A     | SCN9A     | -        |
| hsa-miR-519e | SCNM1     | -         | SCNM1    |
| hsa-miR-519e | SCTR      | -         | SCTR     |
| hsa-miR-519e | SCUBE3    | SCUBE3    | -        |
| hsa-miR-519e | SCYL2     | SCYL2     | -        |
| hsa-miR-519e | SDR39U1   | SDR39U1   | -        |
| hsa-miR-519e | SEC14L2   | SEC14L2   | -        |
| hsa-miR-519e | SECISBP2L | SECISBP2L | -        |
| hsa-miR-519e | SEMA5A    | -         | SEMA5A   |
| hsa-miR-519e | SENP5     | SENP5     | -        |
| hsa-miR-519e | SENP7     | SENP7     | -        |
| hsa-miR-519e | SEPSECS   | SEPSECS   | -        |
| hsa-miR-519e | SERP1     | SERP1     | -        |
| hsa-miR-519e | SERPINA1  | SERPINA1  | -        |
| hsa-miR-519e | SESN2     | SESN2     | -        |
| hsa-miR-519e | SF3A3     | SF3A3     | -        |
| hsa-miR-519e | SFT2D2    | SFT2D2    | -        |
| hsa-miR-519e | SGK3      | SGK3      | -        |
| hsa-miR-519e | SGMS2     | SGMS2     | -        |
| hsa-miR-519e | SH3BP5L   | SH3BP5L   | -        |
| hsa-miR-519e | SHISA2    | SHISA2    | -        |
| hsa-miR-519e | SHOX2     | SHOX2     | -        |
| hsa-miR-519e | SIAE      | SIAE      | -        |
| hsa-miR-519e | SIDT1     | SIDT1     | -        |
| hsa-miR-519e | SIN3B     | SIN3B     | -        |
| hsa-miR-519e | SLAMF8    | SLAMF8    | -        |
| hsa-miR-519e | SLC11A2   | SLC11A2   | -        |
| hsa-miR-519e | SLC12A7   | SLC12A7   | -        |
| hsa-miR-519e | SLC16A7   | SLC16A7   | -        |
| hsa-miR-519e | SLC17A8   | SLC17A8   | -        |
| hsa-miR-519e | SLC25A23  | SLC25A23  | -        |
| hsa-miR-519e | SLC25A42  | -         | SLC25A42 |
| hsa-miR-519e | SLC26A7   | SLC26A7   | -        |
| hsa-miR-519e | SLC28A1   | SLC28A1   | -        |
| hsa-miR-519e | SLC2A1    | SLC2A1    | -        |
| hsa-miR-519e | SLC30A7   | SLC30A7   | -        |
| hsa-miR-519e | SLC35F1   | SLC35F1   | -        |
| hsa-miR-519e | SLC36A4   | SLC36A4   | -        |
| hsa-miR-519e | SLC38A2   | SLC38A2   | -        |
| hsa-miR-519e | SLC45A3   | SLC45A3   | -        |
| hsa-miR-519e | SLC47A1   | SLC47A1   | -        |
| hsa-miR-519e | SLC48A1   | SLC48A1   | -        |

|              |            |            |         |
|--------------|------------|------------|---------|
| hsa-miR-519e | SLC6A15    | SLC6A15    | -       |
| hsa-miR-519e | SLCO2A1    | SLCO2A1    | -       |
| hsa-miR-519e | SLITRK6    | SLITRK6    | -       |
| hsa-miR-519e | SMAP2      | SMAP2      | -       |
| hsa-miR-519e | SMARCAD1   | SMARCAD1   | -       |
| hsa-miR-519e | -          | SNRPB      | SNRPB   |
| hsa-miR-519e | SORBS2     | SORBS2     | -       |
| hsa-miR-519e | SOX21      | SOX21      | -       |
| hsa-miR-519e | SOX4       | SOX4       | -       |
| hsa-miR-519e | SP7        | SP7        | -       |
| hsa-miR-519e | SPG7       | SPG7       | -       |
| hsa-miR-519e | SPOCK2     | SPOCK2     | -       |
| hsa-miR-519e | SPSB2      | -          | SPSB2   |
| hsa-miR-519e | SPTBN4     | SPTBN4     | -       |
| hsa-miR-519e | SRP9       | SRP9       | -       |
| hsa-miR-519e | -          | SRPK2      | SRPK2   |
| hsa-miR-519e | SRXN1      | SRXN1      | -       |
| hsa-miR-519e | SS18L1     | SS18L1     | -       |
| hsa-miR-519e | SSFA2      | SSFA2      | -       |
| hsa-miR-519e | SSTR1      | SSTR1      | -       |
| hsa-miR-519e | ST6GAL2    | ST6GAL2    | -       |
| hsa-miR-519e | ST6GALNAC6 | ST6GALNAC6 | -       |
| hsa-miR-519e | -          | STAG2      | STAG2   |
| hsa-miR-519e | STEAP4     | STEAP4     | -       |
| hsa-miR-519e | STON1      | STON1      | -       |
| hsa-miR-519e | STRBP      | STRBP      | -       |
| hsa-miR-519e | STS        | STS        | -       |
| hsa-miR-519e | STX12      | STX12      | -       |
| hsa-miR-519e | SUN1       | SUN1       | -       |
| hsa-miR-519e | -          | SUSD2      | SUSD2   |
| hsa-miR-519e | SUZ12      | SUZ12      | -       |
| hsa-miR-519e | SV2B       | SV2B       | -       |
| hsa-miR-519e | SYNE1      | SYNE1      | -       |
| hsa-miR-519e | SYNM       | SYNM       | -       |
| hsa-miR-519e | SYT1       | SYT1       | -       |
| hsa-miR-519e | SYT13      | SYT13      | -       |
| hsa-miR-519e | SYT14      | SYT14      | -       |
| hsa-miR-519e | SYT8       | -          | SYT8    |
| hsa-miR-519e | SYTL3      | -          | SYTL3   |
| hsa-miR-519e | TADA1      | TADA1      | -       |
| hsa-miR-519e | TBC1D17    | -          | TBC1D17 |
| hsa-miR-519e | TBC1D28    | TBC1D28    | -       |
| hsa-miR-519e | TBC1D3     | TBC1D3     | -       |
| hsa-miR-519e | TBC1D3H    | TBC1D3H    | -       |
| hsa-miR-519e | -          | TBC1D7     | TBC1D7  |
| hsa-miR-519e | TBC1D8B    | TBC1D8B    | -       |
| hsa-miR-519e | TCF12      | TCF12      | -       |
| hsa-miR-519e | TDP1       | TDP1       | -       |
| hsa-miR-519e | TEC        | TEC        | -       |
| hsa-miR-519e | TECRL      | TECRL      | -       |
| hsa-miR-519e | TFF3       | TFF3       | -       |

|              |           |           |           |
|--------------|-----------|-----------|-----------|
| hsa-miR-519e | TGFBR2    | TGFBR2    | -         |
| hsa-miR-519e | THAP3     | -         | THAP3     |
| hsa-miR-519e | THBS1     | THBS1     | -         |
| hsa-miR-519e | THY1      | -         | THY1      |
| hsa-miR-519e | TJP2      | TJP2      | -         |
| hsa-miR-519e | TLK1      | TLK1      | -         |
| hsa-miR-519e | TLK2      | TLK2      | -         |
| hsa-miR-519e | TMBIM6    | TMBIM6    | -         |
| hsa-miR-519e | TMEM194B  | TMEM194B  | -         |
| hsa-miR-519e | TMEM2     | TMEM2     | -         |
| hsa-miR-519e | TMEM203   | TMEM203   | -         |
| hsa-miR-519e | TMEM218   | TMEM218   | -         |
| hsa-miR-519e | TMEM220   | TMEM220   | -         |
| hsa-miR-519e | TMEM47    | TMEM47    | -         |
| hsa-miR-519e | TMPRSS13  | TMPRSS13  | -         |
| hsa-miR-519e | TMX3      | TMX3      | -         |
| hsa-miR-519e | TNFAIP8L2 | -         | TNFAIP8L2 |
| hsa-miR-519e | TNFRSF10D | -         | TNFRSF10D |
| hsa-miR-519e | TNFRSF11A | -         | TNFRSF11A |
| hsa-miR-519e | TNFRSF11B | TNFRSF11B | -         |
| hsa-miR-519e | TNFRSF13C | -         | TNFRSF13C |
| hsa-miR-519e | TNFSF12   | TNFSF12   | -         |
| hsa-miR-519e | TOB1      | TOB1      | -         |
| hsa-miR-519e | TOR1AIP2  | TOR1AIP2  | -         |
| hsa-miR-519e | TP53BP2   | TP53BP2   | -         |
| hsa-miR-519e | TP53INP1  | -         | TP53INP1  |
| hsa-miR-519e | TRAF3IP1  | TRAF3IP1  | -         |
| hsa-miR-519e | TRAF4     | TRAF4     | -         |
| hsa-miR-519e | TRAK1     | TRAK1     | -         |
| hsa-miR-519e | TRDN      | TRDN      | -         |
| hsa-miR-519e | TREML2    | -         | TREML2    |
| hsa-miR-519e | TRIM2     | TRIM2     | -         |
| hsa-miR-519e | TRIM22    | TRIM22    | -         |
| hsa-miR-519e | TRIM32    | TRIM32    | -         |
| hsa-miR-519e | TRIM55    | TRIM55    | -         |
| hsa-miR-519e | TRIM9     | TRIM9     | -         |
| hsa-miR-519e | TRNAU1AP  | TRNAU1AP  | -         |
| hsa-miR-519e | TRPM8     | TRPM8     | -         |
| hsa-miR-519e | TSPAN2    | TSPAN2    | -         |
| hsa-miR-519e | TSPAN6    | TSPAN6    | -         |
| hsa-miR-519e | -         | TTC16     | TTC16     |
| hsa-miR-519e | TTC28     | TTC28     | -         |
| hsa-miR-519e | TUBA8     | TUBA8     | -         |
| hsa-miR-519e | TUFT1     | TUFT1     | -         |
| hsa-miR-519e | TYK2      | -         | TYK2      |
| hsa-miR-519e | UBA2      | UBA2      | -         |
| hsa-miR-519e | UBA7      | UBA7      | -         |
| hsa-miR-519e | UBASH3B   | UBASH3B   | -         |
| hsa-miR-519e | UBE2V2    | UBE2V2    | -         |
| hsa-miR-519e | UBIAD1    | UBIAD1    | -         |
| hsa-miR-519e | UBL7      | -         | UBL7      |

|              |         |         |         |
|--------------|---------|---------|---------|
| hsa-miR-519e | UBQLNL  | UBQLNL  | -       |
| hsa-miR-519e | UBR1    | UBR1    | -       |
| hsa-miR-519e | UBR5    | UBR5    | -       |
| hsa-miR-519e | UBTD2   | UBTD2   | -       |
| hsa-miR-519e | UBTF    | -       | UBTF    |
| hsa-miR-519e | UCK2    | -       | UCK2    |
| hsa-miR-519e | -       | UFM1    | UFM1    |
| hsa-miR-519e | UMODL1  | UMODL1  | -       |
| hsa-miR-519e | UNC80   | UNC80   | -       |
| hsa-miR-519e | UNK     | UNK     | -       |
| hsa-miR-519e | UPP2    | UPP2    | -       |
| hsa-miR-519e | UQCC    | UQCC    | -       |
| hsa-miR-519e | USH2A   | USH2A   | -       |
| hsa-miR-519e | USP12   | -       | USP12   |
| hsa-miR-519e | USP46   | -       | USP46   |
| hsa-miR-519e | USP6NL  | USP6NL  | -       |
| hsa-miR-519e | VAPA    | VAPA    | -       |
| hsa-miR-519e | VAT1L   | VAT1L   | -       |
| hsa-miR-519e | -       | VIM     | VIM     |
| hsa-miR-519e | VNN1    | -       | VNN1    |
| hsa-miR-519e | VPS4A   | VPS4A   | -       |
| hsa-miR-519e | VTI1A   | VTI1A   | -       |
| hsa-miR-519e | WAC     | WAC     | -       |
| hsa-miR-519e | WBP2NL  | WBP2NL  | -       |
| hsa-miR-519e | WBSCR22 | -       | WBSCR22 |
| hsa-miR-519e | WNT10B  | WNT10B  | -       |
| hsa-miR-519e | XAF1    | XAF1    | -       |
| hsa-miR-519e | XIRP2   | XIRP2   | -       |
| hsa-miR-519e | XRN1    | XRN1    | -       |
| hsa-miR-519e | YTHDC1  | YTHDC1  | -       |
| hsa-miR-519e | ZADH2   | ZADH2   | -       |
| hsa-miR-519e | ZAK     | ZAK     | -       |
| hsa-miR-519e | ZBTB20  | ZBTB20  | -       |
| hsa-miR-519e | ZBTB7A  | ZBTB7A  | -       |
| hsa-miR-519e | ZC3H12B | ZC3H12B | -       |
| hsa-miR-519e | ZCCHC16 | ZCCHC16 | -       |
| hsa-miR-519e | ZCCHC3  | ZCCHC3  | -       |
| hsa-miR-519e | ZCCHC4  | ZCCHC4  | -       |
| hsa-miR-519e | -       | ZDHHC13 | ZDHHC13 |
| hsa-miR-519e | ZFAND5  | ZFAND5  | -       |
| hsa-miR-519e | ZFHX3   | ZFHX3   | -       |
| hsa-miR-519e | ZFYVE1  | ZFYVE1  | -       |
| hsa-miR-519e | ZKSCAN1 | ZKSCAN1 | -       |
| hsa-miR-519e | ZKSCAN2 | ZKSCAN2 | -       |
| hsa-miR-519e | ZNF100  | ZNF100  | -       |
| hsa-miR-519e | ZNF117  | ZNF117  | -       |
| hsa-miR-519e | ZNF185  | ZNF185  | -       |
| hsa-miR-519e | ZNF192  | ZNF192  | -       |
| hsa-miR-519e | ZNF2    | ZNF2    | -       |
| hsa-miR-519e | ZNF202  | ZNF202  | -       |
| hsa-miR-519e | ZNF205  | -       | ZNF205  |

|                 |         |         |         |
|-----------------|---------|---------|---------|
| hsa-miR-519e    | -       | ZNF253  | ZNF253  |
| hsa-miR-519e    | ZNF257  | ZNF257  | -       |
| hsa-miR-519e    | ZNF280B | ZNF280B | -       |
| hsa-miR-519e    | ZNF397  | ZNF397  | -       |
| hsa-miR-519e    | ZNF506  | ZNF506  | -       |
| hsa-miR-519e    | ZNF585A | ZNF585A | -       |
| hsa-miR-519e    | ZNF618  | -       | ZNF618  |
| hsa-miR-519e    | ZNF626  | ZNF626  | -       |
| hsa-miR-519e    | ZNF678  | ZNF678  | -       |
| hsa-miR-519e    | ZNF680  | ZNF680  | -       |
| hsa-miR-519e    | ZNF681  | ZNF681  | -       |
| hsa-miR-519e    | ZNF75A  | ZNF75A  | -       |
| hsa-miR-519e    | ZNF800  | ZNF800  | -       |
| hsa-miR-519e    | ZNF804A | ZNF804A | -       |
| hsa-miR-519e    | ZNF81   | -       | ZNF81   |
| hsa-miR-519e    | ZNF90   | ZNF90   | -       |
| hsa-miR-519e    | ZNF92   | ZNF92   | -       |
| hsa-miR-519e    | ZNRF1   | ZNRF1   | -       |
| hsa-miR-519e    | ZNRF3   | ZNRF3   | -       |
| hsa-miR-519e    | ZSWIM6  | ZSWIM6  | -       |
| hsa-miR-519e    | ZWILCH  | ZWILCH  | -       |
| hsa-miR-548d-3p | -       | ABCA10  | ABCA10  |
| hsa-miR-548d-3p | -       | ABI1    | ABI1    |
| hsa-miR-548d-3p | -       | ACADL   | ACADL   |
| hsa-miR-548d-3p | -       | ACADM   | ACADM   |
| hsa-miR-548d-3p | -       | ACN9    | ACN9    |
| hsa-miR-548d-3p | -       | ACOX3   | ACOX3   |
| hsa-miR-548d-3p | -       | ACTG1   | ACTG1   |
| hsa-miR-548d-3p | -       | ACTN2   | ACTN2   |
| hsa-miR-548d-3p | -       | ACYP1   | ACYP1   |
| hsa-miR-548d-3p | -       | ADC     | ADC     |
| hsa-miR-548d-3p | -       | ADORA2B | ADORA2B |
| hsa-miR-548d-3p | -       | AGPAT3  | AGPAT3  |
| hsa-miR-548d-3p | -       | AGTPBP1 | AGTPBP1 |
| hsa-miR-548d-3p | -       | AHR     | AHR     |
| hsa-miR-548d-3p | -       | AIM1L   | AIM1L   |
| hsa-miR-548d-3p | -       | AKR7A2  | AKR7A2  |
| hsa-miR-548d-   | -       | AKT2    | AKT2    |

|                 |   |          |          |
|-----------------|---|----------|----------|
| 3p              |   |          |          |
| hsa-miR-548d-3p | - | ALG10    | ALG10    |
| hsa-miR-548d-3p | - | ALS2     | ALS2     |
| hsa-miR-548d-3p | - | ANKRA2   | ANKRA2   |
| hsa-miR-548d-3p | - | ANKRD45  | ANKRD45  |
| hsa-miR-548d-3p | - | ANKRD5   | ANKRD5   |
| hsa-miR-548d-3p | - | ANKZF1   | ANKZF1   |
| hsa-miR-548d-3p | - | ANP32B   | ANP32B   |
| hsa-miR-548d-3p | - | ANP32E   | ANP32E   |
| hsa-miR-548d-3p | - | ANUBL1   | ANUBL1   |
| hsa-miR-548d-3p | - | ANXA8    | ANXA8    |
| hsa-miR-548d-3p | - | ANXA8L1  | ANXA8L1  |
| hsa-miR-548d-3p | - | ANXA8L2  | ANXA8L2  |
| hsa-miR-548d-3p | - | AP4E1    | AP4E1    |
| hsa-miR-548d-3p | - | APOBEC2  | APOBEC2  |
| hsa-miR-548d-3p | - | ARG2     | ARG2     |
| hsa-miR-548d-3p | - | ARHGAP21 | ARHGAP21 |
| hsa-miR-548d-3p | - | ARL3     | ARL3     |
| hsa-miR-548d-3p | - | ARL4A    | ARL4A    |
| hsa-miR-548d-3p | - | ARPC1A   | ARPC1A   |
| hsa-miR-548d-3p | - | ARSJ     | ARSJ     |
| hsa-miR-548d-3p | - | ASF1A    | ASF1A    |
| hsa-miR-548d-3p | - | ASH1L    | ASH1L    |
| hsa-miR-548d-3p | - | ATF2     | ATF2     |
| hsa-miR-548d-3p | - | ATG10    | ATG10    |
| hsa-miR-548d-3p | - | ATM      | ATM      |
| hsa-miR-548d-3p | - | ATP1A1   | ATP1A1   |
| hsa-miR-548d-3p | - | ATP5F1   | ATP5F1   |
| hsa-miR-548d-3p | - | ATRNL1   | ATRNL1   |

|                 |   |           |           |
|-----------------|---|-----------|-----------|
| 3p              |   |           |           |
| hsa-miR-548d-3p | - | AUP1      | AUP1      |
| hsa-miR-548d-3p | - | B3GALNT1  | B3GALNT1  |
| hsa-miR-548d-3p | - | B3GNT4    | B3GNT4    |
| hsa-miR-548d-3p | - | BAG3      | BAG3      |
| hsa-miR-548d-3p | - | BARX2     | BARX2     |
| hsa-miR-548d-3p | - | BAZ1A     | BAZ1A     |
| hsa-miR-548d-3p | - | BBS2      | BBS2      |
| hsa-miR-548d-3p | - | BCR       | BCR       |
| hsa-miR-548d-3p | - | BEX2      | BEX2      |
| hsa-miR-548d-3p | - | BIRC5     | BIRC5     |
| hsa-miR-548d-3p | - | BMPR1A    | BMPR1A    |
| hsa-miR-548d-3p | - | BOLL      | BOLL      |
| hsa-miR-548d-3p | - | BPI       | BPI       |
| hsa-miR-548d-3p | - | BPIL2     | BPIL2     |
| hsa-miR-548d-3p | - | C10orf137 | C10orf137 |
| hsa-miR-548d-3p | - | C10orf4   | C10orf4   |
| hsa-miR-548d-3p | - | C11orf53  | C11orf53  |
| hsa-miR-548d-3p | - | C12orf11  | C12orf11  |
| hsa-miR-548d-3p | - | C12orf60  | C12orf60  |
| hsa-miR-548d-3p | - | C13orf18  | C13orf18  |
| hsa-miR-548d-3p | - | C13orf31  | C13orf31  |
| hsa-miR-548d-3p | - | C14orf39  | C14orf39  |
| hsa-miR-548d-3p | - | C15orf29  | C15orf29  |
| hsa-miR-548d-3p | - | C19orf21  | C19orf21  |
| hsa-miR-548d-3p | - | C19orf22  | C19orf22  |
| hsa-miR-548d-3p | - | C19orf34  | C19orf34  |
| hsa-miR-548d-3p | - | C1GALT1C1 | C1GALT1C1 |
| hsa-miR-548d-   | - | C1orf129  | C1orf129  |

|                 |   |          |          |
|-----------------|---|----------|----------|
| 3p              |   |          |          |
| hsa-miR-548d-3p | - | C1orf25  | C1orf25  |
| hsa-miR-548d-3p | - | C1orf83  | C1orf83  |
| hsa-miR-548d-3p | - | C1orf94  | C1orf94  |
| hsa-miR-548d-3p | - | C4orf27  | C4orf27  |
| hsa-miR-548d-3p | - | C5orf25  | C5orf25  |
| hsa-miR-548d-3p | - | C5orf35  | C5orf35  |
| hsa-miR-548d-3p | - | C6orf105 | C6orf105 |
| hsa-miR-548d-3p | - | C6orf192 | C6orf192 |
| hsa-miR-548d-3p | - | C6orf62  | C6orf62  |
| hsa-miR-548d-3p | - | C7orf28A | C7orf28A |
| hsa-miR-548d-3p | - | C7orf28B | C7orf28B |
| hsa-miR-548d-3p | - | C9orf102 | C9orf102 |
| hsa-miR-548d-3p | - | C9orf46  | C9orf46  |
| hsa-miR-548d-3p | - | C9orf64  | C9orf64  |
| hsa-miR-548d-3p | - | C9orf86  | C9orf86  |
| hsa-miR-548d-3p | - | CAPZB    | CAPZB    |
| hsa-miR-548d-3p | - | CASP1    | CASP1    |
| hsa-miR-548d-3p | - | CAST     | CAST     |
| hsa-miR-548d-3p | - | CBS      | CBS      |
| hsa-miR-548d-3p | - | CBX3     | CBX3     |
| hsa-miR-548d-3p | - | CCDC102B | CCDC102B |
| hsa-miR-548d-3p | - | CCDC115  | CCDC115  |
| hsa-miR-548d-3p | - | CCDC127  | CCDC127  |
| hsa-miR-548d-3p | - | CCDC23   | CCDC23   |
| hsa-miR-548d-3p | - | CCDC34   | CCDC34   |
| hsa-miR-548d-3p | - | CCDC68   | CCDC68   |
| hsa-miR-548d-3p | - | CCL20    | CCL20    |
| hsa-miR-548d-3p | - | CCL7     | CCL7     |



|                 |   |          |          |
|-----------------|---|----------|----------|
| 3p              |   |          |          |
| hsa-miR-548d-3p | - | CCNB2    | CCNB2    |
| hsa-miR-548d-3p | - | CD1E     | CD1E     |
| hsa-miR-548d-3p | - | CD63     | CD63     |
| hsa-miR-548d-3p | - | CD70     | CD70     |
| hsa-miR-548d-3p | - | CDC26    | CDC26    |
| hsa-miR-548d-3p | - | CDC42BPB | CDC42BPB |
| hsa-miR-548d-3p | - | CDH12    | CDH12    |
| hsa-miR-548d-3p | - | CDH2     | CDH2     |
| hsa-miR-548d-3p | - | CDK7     | CDK7     |
| hsa-miR-548d-3p | - | CEP110   | CEP110   |
| hsa-miR-548d-3p | - | CEP152   | CEP152   |
| hsa-miR-548d-3p | - | CEP57    | CEP57    |
| hsa-miR-548d-3p | - | CETN3    | CETN3    |
| hsa-miR-548d-3p | - | CHCHD7   | CHCHD7   |
| hsa-miR-548d-3p | - | CHRDL1   | CHRDL1   |
| hsa-miR-548d-3p | - | CIRBP    | CIRBP    |
| hsa-miR-548d-3p | - | CKAP2    | CKAP2    |
| hsa-miR-548d-3p | - | CKAP4    | CKAP4    |
| hsa-miR-548d-3p | - | CLCN3    | CLCN3    |
| hsa-miR-548d-3p | - | CLDN7    | CLDN7    |
| hsa-miR-548d-3p | - | CLEC4D   | CLEC4D   |
| hsa-miR-548d-3p | - | CLLU1OS  | CLLU1OS  |
| hsa-miR-548d-3p | - | CLP1     | CLP1     |
| hsa-miR-548d-3p | - | CLTC     | CLTC     |
| hsa-miR-548d-3p | - | CMTM8    | CMTM8    |
| hsa-miR-548d-3p | - | CNNM3    | CNNM3    |
| hsa-miR-548d-3p | - | CNTN5    | CNTN5    |
| hsa-miR-548d-3p | - | CNTNAP3  | CNTNAP3  |

|                 |   |          |          |
|-----------------|---|----------|----------|
| 3p              |   |          |          |
| hsa-miR-548d-3p | - | CNTNAP3B | CNTNAP3B |
| hsa-miR-548d-3p | - | COIL     | COIL     |
| hsa-miR-548d-3p | - | COMMD10  | COMMD10  |
| hsa-miR-548d-3p | - | COX18    | COX18    |
| hsa-miR-548d-3p | - | CPE      | CPE      |
| hsa-miR-548d-3p | - | CPNE4    | CPNE4    |
| hsa-miR-548d-3p | - | CPSF6    | CPSF6    |
| hsa-miR-548d-3p | - | CPVL     | CPVL     |
| hsa-miR-548d-3p | - | CREBBP   | CREBBP   |
| hsa-miR-548d-3p | - | CRY1     | CRY1     |
| hsa-miR-548d-3p | - | CSRP1    | CSRP1    |
| hsa-miR-548d-3p | - | CTNNBIP1 | CTNNBIP1 |
| hsa-miR-548d-3p | - | CTSW     | CTSW     |
| hsa-miR-548d-3p | - | CTTN     | CTTN     |
| hsa-miR-548d-3p | - | CXCL6    | CXCL6    |
| hsa-miR-548d-3p | - | CXCR4    | CXCR4    |
| hsa-miR-548d-3p | - | CXorf22  | CXorf22  |
| hsa-miR-548d-3p | - | DAP3     | DAP3     |
| hsa-miR-548d-3p | - | DAZAP1   | DAZAP1   |
| hsa-miR-548d-3p | - | DKAKD    | DKAKD    |
| hsa-miR-548d-3p | - | DCDC1    | DCDC1    |
| hsa-miR-548d-3p | - | DCLK1    | DCLK1    |
| hsa-miR-548d-3p | - | DCUN1D5  | DCUN1D5  |
| hsa-miR-548d-3p | - | DDX4     | DDX4     |
| hsa-miR-548d-3p | - | DDX46    | DDX46    |
| hsa-miR-548d-3p | - | DDX55    | DDX55    |
| hsa-miR-548d-3p | - | DEK      | DEK      |
| hsa-miR-548d-3p | - | DENND1C  | DENND1C  |

|                 |   |        |        |
|-----------------|---|--------|--------|
| 3p              |   |        |        |
| hsa-miR-548d-3p | - | DGKB   | DGKB   |
| hsa-miR-548d-3p | - | DHRS7C | DHRS7C |
| hsa-miR-548d-3p | - | DIP2C  | DIP2C  |
| hsa-miR-548d-3p | - | DIS3L2 | DIS3L2 |
| hsa-miR-548d-3p | - | DLG4   | DLG4   |
| hsa-miR-548d-3p | - | DMC1   | DMC1   |
| hsa-miR-548d-3p | - | DMD    | DMD    |
| hsa-miR-548d-3p | - | DMRTA2 | DMRTA2 |
| hsa-miR-548d-3p | - | DMXL2  | DMXL2  |
| hsa-miR-548d-3p | - | DNAH17 | DNAH17 |
| hsa-miR-548d-3p | - | DNAH6  | DNAH6  |
| hsa-miR-548d-3p | - | DNAJB1 | DNAJB1 |
| hsa-miR-548d-3p | - | DNAL4  | DNAL4  |
| hsa-miR-548d-3p | - | DND1   | DND1   |
| hsa-miR-548d-3p | - | DOCK10 | DOCK10 |
| hsa-miR-548d-3p | - | DOCK6  | DOCK6  |
| hsa-miR-548d-3p | - | DONSON | DONSON |
| hsa-miR-548d-3p | - | DPAGT1 | DPAGT1 |
| hsa-miR-548d-3p | - | DSC2   | DSC2   |
| hsa-miR-548d-3p | - | DSCR4  | DSCR4  |
| hsa-miR-548d-3p | - | EAF1   | EAF1   |
| hsa-miR-548d-3p | - | ECHDC1 | ECHDC1 |
| hsa-miR-548d-3p | - | EEA1   | EEA1   |
| hsa-miR-548d-3p | - | EEF1A1 | EEF1A1 |
| hsa-miR-548d-3p | - | EFHB   | EFHB   |
| hsa-miR-548d-3p | - | EFHD1  | EFHD1  |
| hsa-miR-548d-3p | - | EGFL6  | EGFL6  |
| hsa-miR-548d-3p | - | EI24   | EI24   |

|                 |   |          |          |
|-----------------|---|----------|----------|
| 3p              |   |          |          |
| hsa-miR-548d-3p | - | EIF2C2   | EIF2C2   |
| hsa-miR-548d-3p | - | EIF4G2   | EIF4G2   |
| hsa-miR-548d-3p | - | ELAVL2   | ELAVL2   |
| hsa-miR-548d-3p | - | ELK4     | ELK4     |
| hsa-miR-548d-3p | - | EMILIN1  | EMILIN1  |
| hsa-miR-548d-3p | - | EPB41    | EPB41    |
| hsa-miR-548d-3p | - | EPHA2    | EPHA2    |
| hsa-miR-548d-3p | - | ETF1     | ETF1     |
| hsa-miR-548d-3p | - | EVL      | EVL      |
| hsa-miR-548d-3p | - | EXOSC3   | EXOSC3   |
| hsa-miR-548d-3p | - | FAM104A  | FAM104A  |
| hsa-miR-548d-3p | - | FAM108C1 | FAM108C1 |
| hsa-miR-548d-3p | - | FAM118B  | FAM118B  |
| hsa-miR-548d-3p | - | FAM120C  | FAM120C  |
| hsa-miR-548d-3p | - | FAM40A   | FAM40A   |
| hsa-miR-548d-3p | - | FAM54B   | FAM54B   |
| hsa-miR-548d-3p | - | FAM5C    | FAM5C    |
| hsa-miR-548d-3p | - | FAM75A2  | FAM75A2  |
| hsa-miR-548d-3p | - | FAM75A3  | FAM75A3  |
| hsa-miR-548d-3p | - | FAM75A6  | FAM75A6  |
| hsa-miR-548d-3p | - | FAM76A   | FAM76A   |
| hsa-miR-548d-3p | - | FAS      | FAS      |
| hsa-miR-548d-3p | - | FBLN2    | FBLN2    |
| hsa-miR-548d-3p | - | FBXL20   | FBXL20   |
| hsa-miR-548d-3p | - | FBXO5    | FBXO5    |
| hsa-miR-548d-3p | - | FBXW2    | FBXW2    |
| hsa-miR-548d-3p | - | FCRLB    | FCRLB    |
| hsa-miR-548d-3p | - | FGD1     | FGD1     |

|                 |   |          |          |
|-----------------|---|----------|----------|
| 3p              |   |          |          |
| hsa-miR-548d-3p | - | FGD2     | FGD2     |
| hsa-miR-548d-3p | - | FGF8     | FGF8     |
| hsa-miR-548d-3p | - | FHL5     | FHL5     |
| hsa-miR-548d-3p | - | FN1      | FN1      |
| hsa-miR-548d-3p | - | FRMD3    | FRMD3    |
| hsa-miR-548d-3p | - | FSIP1    | FSIP1    |
| hsa-miR-548d-3p | - | FTSJ2    | FTSJ2    |
| hsa-miR-548d-3p | - | FUCA2    | FUCA2    |
| hsa-miR-548d-3p | - | FUS      | FUS      |
| hsa-miR-548d-3p | - | FXVD7    | FXVD7    |
| hsa-miR-548d-3p | - | GABRB2   | GABRB2   |
| hsa-miR-548d-3p | - | GAL3ST3  | GAL3ST3  |
| hsa-miR-548d-3p | - | GALNT11  | GALNT11  |
| hsa-miR-548d-3p | - | GALNT5   | GALNT5   |
| hsa-miR-548d-3p | - | GAN      | GAN      |
| hsa-miR-548d-3p | - | GARNL3   | GARNL3   |
| hsa-miR-548d-3p | - | GART     | GART     |
| hsa-miR-548d-3p | - | GBA3     | GBA3     |
| hsa-miR-548d-3p | - | GFPT1    | GFPT1    |
| hsa-miR-548d-3p | - | GIPC1    | GIPC1    |
| hsa-miR-548d-3p | - | GKN1     | GKN1     |
| hsa-miR-548d-3p | - | GLB1     | GLB1     |
| hsa-miR-548d-3p | - | GLCCI1   | GLCCI1   |
| hsa-miR-548d-3p | - | GLIPR1L2 | GLIPR1L2 |
| hsa-miR-548d-3p | - | GLT25D2  | GLT25D2  |
| hsa-miR-548d-3p | - | GLT8D1   | GLT8D1   |
| hsa-miR-548d-3p | - | GNA11    | GNA11    |
| hsa-miR-548d-3p | - | GOSR2    | GOSR2    |

|                 |   |         |         |
|-----------------|---|---------|---------|
| 3p              |   |         |         |
| hsa-miR-548d-3p | - | GPD1L   | GPD1L   |
| hsa-miR-548d-3p | - | GPNMB   | GPNMB   |
| hsa-miR-548d-3p | - | GPR146  | GPR146  |
| hsa-miR-548d-3p | - | GPR82   | GPR82   |
| hsa-miR-548d-3p | - | GPSM1   | GPSM1   |
| hsa-miR-548d-3p | - | GRIA4   | GRIA4   |
| hsa-miR-548d-3p | - | GRIK1   | GRIK1   |
| hsa-miR-548d-3p | - | GTPBP10 | GTPBP10 |
| hsa-miR-548d-3p | - | H2AFZ   | H2AFZ   |
| hsa-miR-548d-3p | - | HBS1L   | HBS1L   |
| hsa-miR-548d-3p | - | HCFC2   | HCFC2   |
| hsa-miR-548d-3p | - | HDAC8   | HDAC8   |
| hsa-miR-548d-3p | - | HDHD2   | HDHD2   |
| hsa-miR-548d-3p | - | HERC5   | HERC5   |
| hsa-miR-548d-3p | - | HIBCH   | HIBCH   |
| hsa-miR-548d-3p | - | HKR1    | HKR1    |
| hsa-miR-548d-3p | - | HLCS    | HLCS    |
| hsa-miR-548d-3p | - | HMCN1   | HMCN1   |
| hsa-miR-548d-3p | - | HMGB2   | HMGB2   |
| hsa-miR-548d-3p | - | HMGCR   | HMGCR   |
| hsa-miR-548d-3p | - | HMGCS1  | HMGCS1  |
| hsa-miR-548d-3p | - | HMOX1   | HMOX1   |
| hsa-miR-548d-3p | - | HOXA10  | HOXA10  |
| hsa-miR-548d-3p | - | HOXB7   | HOXB7   |
| hsa-miR-548d-3p | - | HOXD13  | HOXD13  |
| hsa-miR-548d-3p | - | HOXD8   | HOXD8   |
| hsa-miR-548d-3p | - | HS2ST1  | HS2ST1  |
| hsa-miR-548d-3p | - | HS3ST1  | HS3ST1  |

|                 |   |         |         |
|-----------------|---|---------|---------|
| 3p              |   |         |         |
| hsa-miR-548d-3p | - | HSPA14  | HSPA14  |
| hsa-miR-548d-3p | - | HTATIP2 | HTATIP2 |
| hsa-miR-548d-3p | - | HUWE1   | HUWE1   |
| hsa-miR-548d-3p | - | IDS     | IDS     |
| hsa-miR-548d-3p | - | IER5    | IER5    |
| hsa-miR-548d-3p | - | IGFL2   | IGFL2   |
| hsa-miR-548d-3p | - | IGSF5   | IGSF5   |
| hsa-miR-548d-3p | - | IKZF3   | IKZF3   |
| hsa-miR-548d-3p | - | IL10RA  | IL10RA  |
| hsa-miR-548d-3p | - | IL11    | IL11    |
| hsa-miR-548d-3p | - | IL19    | IL19    |
| hsa-miR-548d-3p | - | IL1B    | IL1B    |
| hsa-miR-548d-3p | - | IMPG2   | IMPG2   |
| hsa-miR-548d-3p | - | ING3    | ING3    |
| hsa-miR-548d-3p | - | INTS12  | INTS12  |
| hsa-miR-548d-3p | - | INTS7   | INTS7   |
| hsa-miR-548d-3p | - | IPO8    | IPO8    |
| hsa-miR-548d-3p | - | IQCC    | IQCC    |
| hsa-miR-548d-3p | - | IRX2    | IRX2    |
| hsa-miR-548d-3p | - | ISL1    | ISL1    |
| hsa-miR-548d-3p | - | ITGA2   | ITGA2   |
| hsa-miR-548d-3p | - | JHDM1D  | JHDM1D  |
| hsa-miR-548d-3p | - | KATNAL1 | KATNAL1 |
| hsa-miR-548d-3p | - | KBTBD4  | KBTBD4  |
| hsa-miR-548d-3p | - | KBTBD6  | KBTBD6  |
| hsa-miR-548d-3p | - | KCNA3   | KCNA3   |
| hsa-miR-548d-3p | - | KCNJ12  | KCNJ12  |
| hsa-miR-548d-3p | - | KCNN1   | KCNN1   |

|                 |   |          |          |
|-----------------|---|----------|----------|
| 3p              |   |          |          |
| hsa-miR-548d-3p | - | KCTD5    | KCTD5    |
| hsa-miR-548d-3p | - | KCTD8    | KCTD8    |
| hsa-miR-548d-3p | - | KIAA0146 | KIAA0146 |
| hsa-miR-548d-3p | - | KIAA0586 | KIAA0586 |
| hsa-miR-548d-3p | - | KIAA1407 | KIAA1407 |
| hsa-miR-548d-3p | - | KIAA1409 | KIAA1409 |
| hsa-miR-548d-3p | - | KIAA1704 | KIAA1704 |
| hsa-miR-548d-3p | - | KIAA1731 | KIAA1731 |
| hsa-miR-548d-3p | - | KIN      | KIN      |
| hsa-miR-548d-3p | - | KLK4     | KLK4     |
| hsa-miR-548d-3p | - | KREMEN1  | KREMEN1  |
| hsa-miR-548d-3p | - | KTN1     | KTN1     |
| hsa-miR-548d-3p | - | L2HGDH   | L2HGDH   |
| hsa-miR-548d-3p | - | LACTB    | LACTB    |
| hsa-miR-548d-3p | - | LAP3     | LAP3     |
| hsa-miR-548d-3p | - | LARS     | LARS     |
| hsa-miR-548d-3p | - | LOXL1    | LOXL1    |
| hsa-miR-548d-3p | - | LRCH2    | LRCH2    |
| hsa-miR-548d-3p | - | LRFN3    | LRFN3    |
| hsa-miR-548d-3p | - | LRFN4    | LRFN4    |
| hsa-miR-548d-3p | - | LRRC18   | LRRC18   |
| hsa-miR-548d-3p | - | LRRC3    | LRRC3    |
| hsa-miR-548d-3p | - | LRRC37B  | LRRC37B  |
| hsa-miR-548d-3p | - | LRRC47   | LRRC47   |
| hsa-miR-548d-3p | - | LRRC7    | LRRC7    |
| hsa-miR-548d-3p | - | LRRCC1   | LRRCC1   |
| hsa-miR-548d-3p | - | LSM14B   | LSM14B   |
| hsa-miR-548d-3p | - | LUC7L2   | LUC7L2   |



|                 |   |         |         |
|-----------------|---|---------|---------|
| 3p              |   |         |         |
| hsa-miR-548d-3p | - | LYPLA2  | LYPLA2  |
| hsa-miR-548d-3p | - | LYRM1   | LYRM1   |
| hsa-miR-548d-3p | - | MAD2L1  | MAD2L1  |
| hsa-miR-548d-3p | - | MAFB    | MAFB    |
| hsa-miR-548d-3p | - | MAGEA8  | MAGEA8  |
| hsa-miR-548d-3p | - | MAGI3   | MAGI3   |
| hsa-miR-548d-3p | - | MANSC1  | MANSC1  |
| hsa-miR-548d-3p | - | MAP3K5  | MAP3K5  |
| hsa-miR-548d-3p | - | MAP7D3  | MAP7D3  |
| hsa-miR-548d-3p | - | MBNL2   | MBNL2   |
| hsa-miR-548d-3p | - | MC2R    | MC2R    |
| hsa-miR-548d-3p | - | MEOX1   | MEOX1   |
| hsa-miR-548d-3p | - | MET     | MET     |
| hsa-miR-548d-3p | - | MFAP1   | MFAP1   |
| hsa-miR-548d-3p | - | MFAP3   | MFAP3   |
| hsa-miR-548d-3p | - | MMP12   | MMP12   |
| hsa-miR-548d-3p | - | MMP7    | MMP7    |
| hsa-miR-548d-3p | - | MPDZ    | MPDZ    |
| hsa-miR-548d-3p | - | MPZ     | MPZ     |
| hsa-miR-548d-3p | - | MRPL43  | MRPL43  |
| hsa-miR-548d-3p | - | MRPS14  | MRPS14  |
| hsa-miR-548d-3p | - | MRPS17  | MRPS17  |
| hsa-miR-548d-3p | - | MSH4    | MSH4    |
| hsa-miR-548d-3p | - | MTMR11  | MTMR11  |
| hsa-miR-548d-3p | - | MTX1    | MTX1    |
| hsa-miR-548d-3p | - | MUS81   | MUS81   |
| hsa-miR-548d-3p | - | MYB     | MYB     |
| hsa-miR-548d-3p | - | MYCBPAP | MYCBPAP |

|                 |   |         |         |
|-----------------|---|---------|---------|
| 3p              |   |         |         |
| hsa-miR-548d-3p | - | MYCT1   | MYCT1   |
| hsa-miR-548d-3p | - | MYO9B   | MYO9B   |
| hsa-miR-548d-3p | - | MYOD1   | MYOD1   |
| hsa-miR-548d-3p | - | MYOT    | MYOT    |
| hsa-miR-548d-3p | - | NAP1L5  | NAP1L5  |
| hsa-miR-548d-3p | - | NASP    | NASP    |
| hsa-miR-548d-3p | - | NAT1    | NAT1    |
| hsa-miR-548d-3p | - | NAT14   | NAT14   |
| hsa-miR-548d-3p | - | NCK1    | NCK1    |
| hsa-miR-548d-3p | - | NCL     | NCL     |
| hsa-miR-548d-3p | - | NCOR1   | NCOR1   |
| hsa-miR-548d-3p | - | NDFIP2  | NDFIP2  |
| hsa-miR-548d-3p | - | NDUFA10 | NDUFA10 |
| hsa-miR-548d-3p | - | NEB     | NEB     |
| hsa-miR-548d-3p | - | NEDD9   | NEDD9   |
| hsa-miR-548d-3p | - | NEK1    | NEK1    |
| hsa-miR-548d-3p | - | NEK5    | NEK5    |
| hsa-miR-548d-3p | - | NFATC3  | NFATC3  |
| hsa-miR-548d-3p | - | NFKBIA  | NFKBIA  |
| hsa-miR-548d-3p | - | NLRP4   | NLRP4   |
| hsa-miR-548d-3p | - | NMNAT3  | NMNAT3  |
| hsa-miR-548d-3p | - | NOL10   | NOL10   |
| hsa-miR-548d-3p | - | NOVA1   | NOVA1   |
| hsa-miR-548d-3p | - | NPAS3   | NPAS3   |
| hsa-miR-548d-3p | - | NPM3    | NPM3    |
| hsa-miR-548d-3p | - | NR5A2   | NR5A2   |
| hsa-miR-548d-3p | - | NSMAF   | NSMAF   |
| hsa-miR-548d-3p | - | NT5C1B  | NT5C1B  |

|                 |   |         |         |
|-----------------|---|---------|---------|
| 3p              |   |         |         |
| hsa-miR-548d-3p | - | NUDT21  | NUDT21  |
| hsa-miR-548d-3p | - | NWD1    | NWD1    |
| hsa-miR-548d-3p | - | NXN     | NXN     |
| hsa-miR-548d-3p | - | OCIAD1  | OCIAD1  |
| hsa-miR-548d-3p | - | OCLN    | OCLN    |
| hsa-miR-548d-3p | - | ODF2    | ODF2    |
| hsa-miR-548d-3p | - | ODZ2    | ODZ2    |
| hsa-miR-548d-3p | - | ODZ3    | ODZ3    |
| hsa-miR-548d-3p | - | OLFM1   | OLFM1   |
| hsa-miR-548d-3p | - | OR11A1  | OR11A1  |
| hsa-miR-548d-3p | - | OR2C3   | OR2C3   |
| hsa-miR-548d-3p | - | OSBPL10 | OSBPL10 |
| hsa-miR-548d-3p | - | OSBPL5  | OSBPL5  |
| hsa-miR-548d-3p | - | OTUB1   | OTUB1   |
| hsa-miR-548d-3p | - | OTX2    | OTX2    |
| hsa-miR-548d-3p | - | OXT     | OXT     |
| hsa-miR-548d-3p | - | P2RY14  | P2RY14  |
| hsa-miR-548d-3p | - | PACSIN2 | PACSIN2 |
| hsa-miR-548d-3p | - | PAK6    | PAK6    |
| hsa-miR-548d-3p | - | PAOX    | PAOX    |
| hsa-miR-548d-3p | - | PAPOLA  | PAPOLA  |
| hsa-miR-548d-3p | - | PAPSS1  | PAPSS1  |
| hsa-miR-548d-3p | - | PARD6A  | PARD6A  |
| hsa-miR-548d-3p | - | PARN    | PARN    |
| hsa-miR-548d-3p | - | PBK     | PBK     |
| hsa-miR-548d-3p | - | PCMT1   | PCMT1   |
| hsa-miR-548d-3p | - | PCNA    | PCNA    |
| hsa-miR-548d-3p | - | PCNXL2  | PCNXL2  |

|                 |   |          |          |
|-----------------|---|----------|----------|
| 3p              |   |          |          |
| hsa-miR-548d-3p | - | PDCD7    | PDCD7    |
| hsa-miR-548d-3p | - | PDCL3    | PDCL3    |
| hsa-miR-548d-3p | - | PDE6D    | PDE6D    |
| hsa-miR-548d-3p | - | PDE7A    | PDE7A    |
| hsa-miR-548d-3p | - | PDSS2    | PDSS2    |
| hsa-miR-548d-3p | - | PDX1     | PDX1     |
| hsa-miR-548d-3p | - | PDZD4    | PDZD4    |
| hsa-miR-548d-3p | - | PFN1     | PFN1     |
| hsa-miR-548d-3p | - | PGAM1    | PGAM1    |
| hsa-miR-548d-3p | - | PGAM4    | PGAM4    |
| hsa-miR-548d-3p | - | PHF5A    | PHF5A    |
| hsa-miR-548d-3p | - | PI4K2B   | PI4K2B   |
| hsa-miR-548d-3p | - | PIM2     | PIM2     |
| hsa-miR-548d-3p | - | PIR      | PIR      |
| hsa-miR-548d-3p | - | PLA2G4D  | PLA2G4D  |
| hsa-miR-548d-3p | - | PLA2G7   | PLA2G7   |
| hsa-miR-548d-3p | - | PMS1     | PMS1     |
| hsa-miR-548d-3p | - | PNRC1    | PNRC1    |
| hsa-miR-548d-3p | - | POLE4    | POLE4    |
| hsa-miR-548d-3p | - | POLR3GL  | POLR3GL  |
| hsa-miR-548d-3p | - | PPAP2C   | PPAP2C   |
| hsa-miR-548d-3p | - | PPID     | PPID     |
| hsa-miR-548d-3p | - | PPM1G    | PPM1G    |
| hsa-miR-548d-3p | - | PPP1R14B | PPP1R14B |
| hsa-miR-548d-3p | - | PPP1R7   | PPP1R7   |
| hsa-miR-548d-3p | - | PPP4R1   | PPP4R1   |
| hsa-miR-548d-3p | - | PPRC1    | PPRC1    |
| hsa-miR-548d-3p | - | PSAP     | PSAP     |

|                 |   |          |          |
|-----------------|---|----------|----------|
| 3p              |   |          |          |
| hsa-miR-548d-3p | - | PSMA1    | PSMA1    |
| hsa-miR-548d-3p | - | PSPC1    | PSPC1    |
| hsa-miR-548d-3p | - | PTPN2    | PTPN2    |
| hsa-miR-548d-3p | - | PTPRZ1   | PTPRZ1   |
| hsa-miR-548d-3p | - | PURG     | PURG     |
| hsa-miR-548d-3p | - | PYGL     | PYGL     |
| hsa-miR-548d-3p | - | RAB11B   | RAB11B   |
| hsa-miR-548d-3p | - | RABL5    | RABL5    |
| hsa-miR-548d-3p | - | RAI2     | RAI2     |
| hsa-miR-548d-3p | - | RALY     | RALY     |
| hsa-miR-548d-3p | - | RANBP9   | RANBP9   |
| hsa-miR-548d-3p | - | RARRES1  | RARRES1  |
| hsa-miR-548d-3p | - | RBM14    | RBM14    |
| hsa-miR-548d-3p | - | RBM4     | RBM4     |
| hsa-miR-548d-3p | - | RCE1     | RCE1     |
| hsa-miR-548d-3p | - | RCL1     | RCL1     |
| hsa-miR-548d-3p | - | RDBP     | RDBP     |
| hsa-miR-548d-3p | - | RFTN1    | RFTN1    |
| hsa-miR-548d-3p | - | RHOA     | RHOA     |
| hsa-miR-548d-3p | - | RIF1     | RIF1     |
| hsa-miR-548d-3p | - | RIOK1    | RIOK1    |
| hsa-miR-548d-3p | - | RIT2     | RIT2     |
| hsa-miR-548d-3p | - | RNASEH2B | RNASEH2B |
| hsa-miR-548d-3p | - | RNF186   | RNF186   |
| hsa-miR-548d-3p | - | RNF38    | RNF38    |
| hsa-miR-548d-3p | - | RNPC3    | RNPC3    |
| hsa-miR-548d-3p | - | RPA1     | RPA1     |
| hsa-miR-548d-3p | - | RPE      | RPE      |

|                 |   |         |         |
|-----------------|---|---------|---------|
| 3p              |   |         |         |
| hsa-miR-548d-3p | - | RPL10   | RPL10   |
| hsa-miR-548d-3p | - | RPS6KA5 | RPS6KA5 |
| hsa-miR-548d-3p | - | RQCD1   | RQCD1   |
| hsa-miR-548d-3p | - | RSRC1   | RSRC1   |
| hsa-miR-548d-3p | - | RTN1    | RTN1    |
| hsa-miR-548d-3p | - | RUVBL1  | RUVBL1  |
| hsa-miR-548d-3p | - | RWDD3   | RWDD3   |
| hsa-miR-548d-3p | - | SAMD4B  | SAMD4B  |
| hsa-miR-548d-3p | - | SAP130  | SAP130  |
| hsa-miR-548d-3p | - | SAR1B   | SAR1B   |
| hsa-miR-548d-3p | - | SCARF1  | SCARF1  |
| hsa-miR-548d-3p | - | SCG5    | SCG5    |
| hsa-miR-548d-3p | - | SCN9A   | SCN9A   |
| hsa-miR-548d-3p | - | SCUBE2  | SCUBE2  |
| hsa-miR-548d-3p | - | SEC24A  | SEC24A  |
| hsa-miR-548d-3p | - | SEMA3C  | SEMA3C  |
| hsa-miR-548d-3p | - | SEMA4B  | SEMA4B  |
| hsa-miR-548d-3p | - | SENP3   | SENP3   |
| hsa-miR-548d-3p | - | SEPT8   | SEPT8   |
| hsa-miR-548d-3p | - | SETD3   | SETD3   |
| hsa-miR-548d-3p | - | SF1     | SF1     |
| hsa-miR-548d-3p | - | SFRS11  | SFRS11  |
| hsa-miR-548d-3p | - | SFRS2IP | SFRS2IP |
| hsa-miR-548d-3p | - | SFRS9   | SFRS9   |
| hsa-miR-548d-3p | - | SFXN4   | SFXN4   |
| hsa-miR-548d-3p | - | SGCZ    | SGCZ    |
| hsa-miR-548d-3p | - | SGOL2   | SGOL2   |
| hsa-miR-548d-3p | - | SH3BP4  | SH3BP4  |

|                 |   |          |          |
|-----------------|---|----------|----------|
| 3p              |   |          |          |
| hsa-miR-548d-3p | - | SIPA1L2  | SIPA1L2  |
| hsa-miR-548d-3p | - | SIRT5    | SIRT5    |
| hsa-miR-548d-3p | - | SLC10A4  | SLC10A4  |
| hsa-miR-548d-3p | - | SLC19A3  | SLC19A3  |
| hsa-miR-548d-3p | - | SLC22A15 | SLC22A15 |
| hsa-miR-548d-3p | - | SLC25A41 | SLC25A41 |
| hsa-miR-548d-3p | - | SLC2A1   | SLC2A1   |
| hsa-miR-548d-3p | - | SLC2A4RG | SLC2A4RG |
| hsa-miR-548d-3p | - | SLC33A1  | SLC33A1  |
| hsa-miR-548d-3p | - | SLC44A1  | SLC44A1  |
| hsa-miR-548d-3p | - | SMAD6    | SMAD6    |
| hsa-miR-548d-3p | - | SMARCC1  | SMARCC1  |
| hsa-miR-548d-3p | - | SMC1B    | SMC1B    |
| hsa-miR-548d-3p | - | SMCR7    | SMCR7    |
| hsa-miR-548d-3p | - | SNAP91   | SNAP91   |
| hsa-miR-548d-3p | - | SNRPA    | SNRPA    |
| hsa-miR-548d-3p | - | SNTA1    | SNTA1    |
| hsa-miR-548d-3p | - | SNX12    | SNX12    |
| hsa-miR-548d-3p | - | SOBP     | SOBP     |
| hsa-miR-548d-3p | - | SORBS1   | SORBS1   |
| hsa-miR-548d-3p | - | SORCS1   | SORCS1   |
| hsa-miR-548d-3p | - | SOST     | SOST     |
| hsa-miR-548d-3p | - | SOX17    | SOX17    |
| hsa-miR-548d-3p | - | SOX3     | SOX3     |
| hsa-miR-548d-3p | - | SOX7     | SOX7     |
| hsa-miR-548d-3p | - | SPC25    | SPC25    |
| hsa-miR-548d-3p | - | SPG7     | SPG7     |
| hsa-miR-548d-   | - | SPINT2   | SPINT2   |

|                 |   |          |          |
|-----------------|---|----------|----------|
| 3p              |   |          |          |
| hsa-miR-548d-3p | - | SRP54    | SRP54    |
| hsa-miR-548d-3p | - | SRRM2    | SRRM2    |
| hsa-miR-548d-3p | - | SSBP4    | SSBP4    |
| hsa-miR-548d-3p | - | STAMPB   | STAMPB   |
| hsa-miR-548d-3p | - | STAT5B   | STAT5B   |
| hsa-miR-548d-3p | - | STAU2    | STAU2    |
| hsa-miR-548d-3p | - | STC1     | STC1     |
| hsa-miR-548d-3p | - | STIM2    | STIM2    |
| hsa-miR-548d-3p | - | STK10    | STK10    |
| hsa-miR-548d-3p | - | STOML2   | STOML2   |
| hsa-miR-548d-3p | - | SUPT7L   | SUPT7L   |
| hsa-miR-548d-3p | - | SYT10    | SYT10    |
| hsa-miR-548d-3p | - | SYT6     | SYT6     |
| hsa-miR-548d-3p | - | TAF9     | TAF9     |
| hsa-miR-548d-3p | - | TAGLN3   | TAGLN3   |
| hsa-miR-548d-3p | - | TANK     | TANK     |
| hsa-miR-548d-3p | - | TBC1D10A | TBC1D10A |
| hsa-miR-548d-3p | - | TBC1D12  | TBC1D12  |
| hsa-miR-548d-3p | - | TBC1D7   | TBC1D7   |
| hsa-miR-548d-3p | - | TBCA     | TBCA     |
| hsa-miR-548d-3p | - | TBX3     | TBX3     |
| hsa-miR-548d-3p | - | TCF7L1   | TCF7L1   |
| hsa-miR-548d-3p | - | TCFL5    | TCFL5    |
| hsa-miR-548d-3p | - | TCP1     | TCP1     |
| hsa-miR-548d-3p | - | TCP11L2  | TCP11L2  |
| hsa-miR-548d-3p | - | TDG      | TDG      |
| hsa-miR-548d-3p | - | TDRD1    | TDRD1    |
| hsa-miR-548d-   | - | TEX14    | TEX14    |



|                 |   |           |           |
|-----------------|---|-----------|-----------|
| 3p              |   |           |           |
| hsa-miR-548d-3p | - | TEX2      | TEX2      |
| hsa-miR-548d-3p | - | TFAP2C    | TFAP2C    |
| hsa-miR-548d-3p | - | TFB2M     | TFB2M     |
| hsa-miR-548d-3p | - | THAP11    | THAP11    |
| hsa-miR-548d-3p | - | THOC1     | THOC1     |
| hsa-miR-548d-3p | - | THUMPD3   | THUMPD3   |
| hsa-miR-548d-3p | - | THYN1     | THYN1     |
| hsa-miR-548d-3p | - | TJP2      | TJP2      |
| hsa-miR-548d-3p | - | TM2D1     | TM2D1     |
| hsa-miR-548d-3p | - | TMEFF2    | TMEFF2    |
| hsa-miR-548d-3p | - | TMEM107   | TMEM107   |
| hsa-miR-548d-3p | - | TMEM11    | TMEM11    |
| hsa-miR-548d-3p | - | TMEM131   | TMEM131   |
| hsa-miR-548d-3p | - | TMEM165   | TMEM165   |
| hsa-miR-548d-3p | - | TMEM33    | TMEM33    |
| hsa-miR-548d-3p | - | TNFRSF11B | TNFRSF11B |
| hsa-miR-548d-3p | - | TNFRSF21  | TNFRSF21  |
| hsa-miR-548d-3p | - | TNFSF11   | TNFSF11   |
| hsa-miR-548d-3p | - | TOLLIP    | TOLLIP    |
| hsa-miR-548d-3p | - | TOMM34    | TOMM34    |
| hsa-miR-548d-3p | - | TOP2B     | TOP2B     |
| hsa-miR-548d-3p | - | TPK1      | TPK1      |
| hsa-miR-548d-3p | - | TRAF3IP2  | TRAF3IP2  |
| hsa-miR-548d-3p | - | TRAK2     | TRAK2     |
| hsa-miR-548d-3p | - | TRMT11    | TRMT11    |
| hsa-miR-548d-3p | - | TRPC1     | TRPC1     |
| hsa-miR-548d-3p | - | TRPV1     | TRPV1     |
| hsa-miR-548d-3p | - | TSPAN3    | TSPAN3    |

|                 |   |         |         |
|-----------------|---|---------|---------|
| 3p              |   |         |         |
| hsa-miR-548d-3p | - | TTC14   | TTC14   |
| hsa-miR-548d-3p | - | TTC28   | TTC28   |
| hsa-miR-548d-3p | - | TTC31   | TTC31   |
| hsa-miR-548d-3p | - | TUSC3   | TUSC3   |
| hsa-miR-548d-3p | - | UBAP2L  | UBAP2L  |
| hsa-miR-548d-3p | - | UBE2H   | UBE2H   |
| hsa-miR-548d-3p | - | UBE3A   | UBE3A   |
| hsa-miR-548d-3p | - | UFM1    | UFM1    |
| hsa-miR-548d-3p | - | UIMC1   | UIMC1   |
| hsa-miR-548d-3p | - | UNG     | UNG     |
| hsa-miR-548d-3p | - | UPRT    | UPRT    |
| hsa-miR-548d-3p | - | USP1    | USP1    |
| hsa-miR-548d-3p | - | USP16   | USP16   |
| hsa-miR-548d-3p | - | USP2    | USP2    |
| hsa-miR-548d-3p | - | USP24   | USP24   |
| hsa-miR-548d-3p | - | VASN    | VASN    |
| hsa-miR-548d-3p | - | VASP    | VASP    |
| hsa-miR-548d-3p | - | VAX1    | VAX1    |
| hsa-miR-548d-3p | - | VDAC3   | VDAC3   |
| hsa-miR-548d-3p | - | VPS37A  | VPS37A  |
| hsa-miR-548d-3p | - | VTA1    | VTA1    |
| hsa-miR-548d-3p | - | WDFY2   | WDFY2   |
| hsa-miR-548d-3p | - | WDR45   | WDR45   |
| hsa-miR-548d-3p | - | WDR5B   | WDR5B   |
| hsa-miR-548d-3p | - | WDR86   | WDR86   |
| hsa-miR-548d-3p | - | WHSC1L1 | WHSC1L1 |
| hsa-miR-548d-3p | - | WNK3    | WNK3    |
| hsa-miR-548d-3p | - | WNT3    | WNT3    |

|                 |   |         |         |
|-----------------|---|---------|---------|
| 3p              |   |         |         |
| hsa-miR-548d-3p | - | XRN2    | XRN2    |
| hsa-miR-548d-3p | - | YBX1    | YBX1    |
| hsa-miR-548d-3p | - | ZBTB37  | ZBTB37  |
| hsa-miR-548d-3p | - | ZBTB38  | ZBTB38  |
| hsa-miR-548d-3p | - | ZBTB39  | ZBTB39  |
| hsa-miR-548d-3p | - | ZBTB44  | ZBTB44  |
| hsa-miR-548d-3p | - | ZC3H14  | ZC3H14  |
| hsa-miR-548d-3p | - | ZCCHC8  | ZCCHC8  |
| hsa-miR-548d-3p | - | ZDHHC13 | ZDHHC13 |
| hsa-miR-548d-3p | - | ZFP30   | ZFP30   |
| hsa-miR-548d-3p | - | ZMYND11 | ZMYND11 |
| hsa-miR-548d-3p | - | ZNF131  | ZNF131  |
| hsa-miR-548d-3p | - | ZNF160  | ZNF160  |
| hsa-miR-548d-3p | - | ZNF19   | ZNF19   |
| hsa-miR-548d-3p | - | ZNF227  | ZNF227  |
| hsa-miR-548d-3p | - | ZNF267  | ZNF267  |
| hsa-miR-548d-3p | - | ZNF273  | ZNF273  |
| hsa-miR-548d-3p | - | ZNF468  | ZNF468  |
| hsa-miR-548d-3p | - | ZNF493  | ZNF493  |
| hsa-miR-548d-3p | - | ZNF512B | ZNF512B |
| hsa-miR-548d-3p | - | ZNF595  | ZNF595  |
| hsa-miR-548d-3p | - | ZNF626  | ZNF626  |
| hsa-miR-548d-3p | - | ZNF648  | ZNF648  |
| hsa-miR-548d-3p | - | ZNF695  | ZNF695  |
| hsa-miR-548d-3p | - | ZNF701  | ZNF701  |
| hsa-miR-548d-3p | - | ZNF738  | ZNF738  |
| hsa-miR-548d-3p | - | ZNF740  | ZNF740  |
| hsa-miR-548d-3p | - | ZNRD1   | ZNRD1   |

|                |   |          |          |
|----------------|---|----------|----------|
| 3p             |   |          |          |
| hsa-miR-556-3p | - | ABCA6    | ABCA6    |
| hsa-miR-556-3p | - | ABCC9    | ABCC9    |
| hsa-miR-556-3p | - | ABHD12B  | ABHD12B  |
| hsa-miR-556-3p | - | ACADS    | ACADS    |
| hsa-miR-556-3p | - | ACSL1    | ACSL1    |
| hsa-miR-556-3p | - | ADAMTS18 | ADAMTS18 |
| hsa-miR-556-3p | - | ADAMTS9  | ADAMTS9  |
| hsa-miR-556-3p | - | ADRB2    | ADRB2    |
| hsa-miR-556-3p | - | AFF4     | AFF4     |
| hsa-miR-556-3p | - | AGXT2    | AGXT2    |
| hsa-miR-556-3p | - | ALKBH3   | ALKBH3   |
| hsa-miR-556-3p | - | AMT      | AMT      |
| hsa-miR-556-3p | - | ANKAR    | ANKAR    |
| hsa-miR-556-3p | - | ANKRD26  | ANKRD26  |
| hsa-miR-556-3p | - | ANKRD44  | ANKRD44  |
| hsa-miR-556-3p | - | ANKS1B   | ANKS1B   |
| hsa-miR-556-3p | - | ANP32A   | ANP32A   |
| hsa-miR-556-3p | - | ANXA7    | ANXA7    |
| hsa-miR-556-3p | - | APIP     | APIP     |
| hsa-miR-556-3p | - | APLP2    | APLP2    |
| hsa-miR-556-3p | - | ARL6IP1  | ARL6IP1  |
| hsa-miR-556-3p | - | ARMCX3   | ARMCX3   |
| hsa-miR-556-3p | - | ARPC1B   | ARPC1B   |
| hsa-miR-556-3p | - | ARPC2    | ARPC2    |
| hsa-miR-556-3p | - | ARSK     | ARSK     |
| hsa-miR-556-3p | - | ASCC3    | ASCC3    |
| hsa-miR-556-3p | - | ASPN     | ASPN     |
| hsa-miR-556-3p | - | ATP4A    | ATP4A    |

|                |   |           |           |
|----------------|---|-----------|-----------|
| 3p             |   |           |           |
| hsa-miR-556-3p | - | ATPAF1    | ATPAF1    |
| hsa-miR-556-3p | - | B4GALT4   | B4GALT4   |
| hsa-miR-556-3p | - | BAX       | BAX       |
| hsa-miR-556-3p | - | BCKDHB    | BCKDHB    |
| hsa-miR-556-3p | - | BCOR      | BCOR      |
| hsa-miR-556-3p | - | BECN1     | BECN1     |
| hsa-miR-556-3p | - | BLZF1     | BLZF1     |
| hsa-miR-556-3p | - | BRD7      | BRD7      |
| hsa-miR-556-3p | - | BTF3L4    | BTF3L4    |
| hsa-miR-556-3p | - | C10orf81  | C10orf81  |
| hsa-miR-556-3p | - | C14orf126 | C14orf126 |
| hsa-miR-556-3p | - | C16orf46  | C16orf46  |
| hsa-miR-556-3p | - | C17orf37  | C17orf37  |
| hsa-miR-556-3p | - | C18orf56  | C18orf56  |
| hsa-miR-556-3p | - | C1GALT1   | C1GALT1   |
| hsa-miR-556-3p | - | C1orf59   | C1orf59   |
| hsa-miR-556-3p | - | C20orf197 | C20orf197 |
| hsa-miR-556-3p | - | C9orf131  | C9orf131  |
| hsa-miR-556-3p | - | C9orf72   | C9orf72   |
| hsa-miR-556-3p | - | CA5B      | CA5B      |
| hsa-miR-556-3p | - | CACNA1D   | CACNA1D   |
| hsa-miR-556-3p | - | CALCOCO2  | CALCOCO2  |
| hsa-miR-556-3p | - | CBFB      | CBFB      |
| hsa-miR-556-3p | - | CCDC127   | CCDC127   |
| hsa-miR-556-3p | - | CCDC85A   | CCDC85A   |
| hsa-miR-556-3p | - | CCDC85B   | CCDC85B   |
| hsa-miR-556-3p | - | CCNA1     | CCNA1     |
| hsa-miR-556-3p | - | CCR4      | CCR4      |

|                |   |         |         |
|----------------|---|---------|---------|
| 3p             |   |         |         |
| hsa-miR-556-3p | - | CCRL1   | CCRL1   |
| hsa-miR-556-3p | - | CD2AP   | CD2AP   |
| hsa-miR-556-3p | - | CD55    | CD55    |
| hsa-miR-556-3p | - | CDC14A  | CDC14A  |
| hsa-miR-556-3p | - | CDC23   | CDC23   |
| hsa-miR-556-3p | - | CDCP2   | CDCP2   |
| hsa-miR-556-3p | - | CDH26   | CDH26   |
| hsa-miR-556-3p | - | CENPE   | CENPE   |
| hsa-miR-556-3p | - | CENPF   | CENPF   |
| hsa-miR-556-3p | - | CENPK   | CENPK   |
| hsa-miR-556-3p | - | CFC1    | CFC1    |
| hsa-miR-556-3p | - | CHN2    | CHN2    |
| hsa-miR-556-3p | - | CHRD1   | CHRD1   |
| hsa-miR-556-3p | - | CHRM3   | CHRM3   |
| hsa-miR-556-3p | - | CIRH1A  | CIRH1A  |
| hsa-miR-556-3p | - | CKAP2   | CKAP2   |
| hsa-miR-556-3p | - | CLDN16  | CLDN16  |
| hsa-miR-556-3p | - | CLDND1  | CLDND1  |
| hsa-miR-556-3p | - | CNOT2   | CNOT2   |
| hsa-miR-556-3p | - | CP      | CP      |
| hsa-miR-556-3p | - | CRHBP   | CRHBP   |
| hsa-miR-556-3p | - | CROT    | CROT    |
| hsa-miR-556-3p | - | CSDA    | CSDA    |
| hsa-miR-556-3p | - | CTDSPL2 | CTDSPL2 |
| hsa-miR-556-3p | - | CTH     | CTH     |
| hsa-miR-556-3p | - | CXADR   | CXADR   |
| hsa-miR-556-3p | - | CXorf23 | CXorf23 |
| hsa-miR-556-3p | - | CYP3A7  | CYP3A7  |

|                |   |         |         |
|----------------|---|---------|---------|
| 3p             |   |         |         |
| hsa-miR-556-3p | - | CYP4F8  | CYP4F8  |
| hsa-miR-556-3p | - | DARS2   | DARS2   |
| hsa-miR-556-3p | - | DDHD2   | DDHD2   |
| hsa-miR-556-3p | - | DDIT4L  | DDIT4L  |
| hsa-miR-556-3p | - | DDX25   | DDX25   |
| hsa-miR-556-3p | - | DENND1B | DENND1B |
| hsa-miR-556-3p | - | DGKH    | DGKH    |
| hsa-miR-556-3p | - | DHH     | DHH     |
| hsa-miR-556-3p | - | DIP2C   | DIP2C   |
| hsa-miR-556-3p | - | DIRC2   | DIRC2   |
| hsa-miR-556-3p | - | DMRTA1  | DMRTA1  |
| hsa-miR-556-3p | - | DNAJB8  | DNAJB8  |
| hsa-miR-556-3p | - | DNAJC8  | DNAJC8  |
| hsa-miR-556-3p | - | DNM1L   | DNM1L   |
| hsa-miR-556-3p | - | DOCK11  | DOCK11  |
| hsa-miR-556-3p | - | EBPL    | EBPL    |
| hsa-miR-556-3p | - | EEF1A1  | EEF1A1  |
| hsa-miR-556-3p | - | EHBP1   | EHBP1   |
| hsa-miR-556-3p | - | EHMT2   | EHMT2   |
| hsa-miR-556-3p | - | EIF2A   | EIF2A   |
| hsa-miR-556-3p | - | ENPP1   | ENPP1   |
| hsa-miR-556-3p | - | ENPP7   | ENPP7   |
| hsa-miR-556-3p | - | EPM2A   | EPM2A   |
| hsa-miR-556-3p | - | ERCC8   | ERCC8   |
| hsa-miR-556-3p | - | EWSR1   | EWSR1   |
| hsa-miR-556-3p | - | EXOC1   | EXOC1   |
| hsa-miR-556-3p | - | EXOSC1  | EXOSC1  |
| hsa-miR-556-3p | - | F13A1   | F13A1   |

|                |   |         |         |
|----------------|---|---------|---------|
| 3p             |   |         |         |
| hsa-miR-556-3p | - | FAAH2   | FAAH2   |
| hsa-miR-556-3p | - | FCGR3A  | FCGR3A  |
| hsa-miR-556-3p | - | FCRL1   | FCRL1   |
| hsa-miR-556-3p | - | FGFBP1  | FGFBP1  |
| hsa-miR-556-3p | - | FGFR2   | FGFR2   |
| hsa-miR-556-3p | - | FHOD3   | FHOD3   |
| hsa-miR-556-3p | - | FREM2   | FREM2   |
| hsa-miR-556-3p | - | FRY     | FRY     |
| hsa-miR-556-3p | - | FUBP3   | FUBP3   |
| hsa-miR-556-3p | - | FUT8    | FUT8    |
| hsa-miR-556-3p | - | G3BP2   | G3BP2   |
| hsa-miR-556-3p | - | GAP43   | GAP43   |
| hsa-miR-556-3p | - | GBE1    | GBE1    |
| hsa-miR-556-3p | - | GBP7    | GBP7    |
| hsa-miR-556-3p | - | GDAP1   | GDAP1   |
| hsa-miR-556-3p | - | GDAP2   | GDAP2   |
| hsa-miR-556-3p | - | GIPR    | GIPR    |
| hsa-miR-556-3p | - | GPR63   | GPR63   |
| hsa-miR-556-3p | - | GPR84   | GPR84   |
| hsa-miR-556-3p | - | GTF2F2  | GTF2F2  |
| hsa-miR-556-3p | - | GTF2H2  | GTF2H2  |
| hsa-miR-556-3p | - | GUF1    | GUF1    |
| hsa-miR-556-3p | - | HDAC6   | HDAC6   |
| hsa-miR-556-3p | - | HECW1   | HECW1   |
| hsa-miR-556-3p | - | HLA-DMB | HLA-DMB |
| hsa-miR-556-3p | - | HMCN1   | HMCN1   |
| hsa-miR-556-3p | - | HNF4A   | HNF4A   |
| hsa-miR-556-3p | - | HORMAD1 | HORMAD1 |



|                |   |          |          |
|----------------|---|----------|----------|
| 3p             |   |          |          |
| hsa-miR-556-3p | - | HOXA13   | HOXA13   |
| hsa-miR-556-3p | - | HSD17B7  | HSD17B7  |
| hsa-miR-556-3p | - | IDH3A    | IDH3A    |
| hsa-miR-556-3p | - | IFNA10   | IFNA10   |
| hsa-miR-556-3p | - | IGFL2    | IGFL2    |
| hsa-miR-556-3p | - | IL13     | IL13     |
| hsa-miR-556-3p | - | IL13RA1  | IL13RA1  |
| hsa-miR-556-3p | - | IL15     | IL15     |
| hsa-miR-556-3p | - | IL17F    | IL17F    |
| hsa-miR-556-3p | - | IL31RA   | IL31RA   |
| hsa-miR-556-3p | - | IMPA2    | IMPA2    |
| hsa-miR-556-3p | - | IQUB     | IQUB     |
| hsa-miR-556-3p | - | ITFG1    | ITFG1    |
| hsa-miR-556-3p | - | ITGA4    | ITGA4    |
| hsa-miR-556-3p | - | ITGB3BP  | ITGB3BP  |
| hsa-miR-556-3p | - | ITM2A    | ITM2A    |
| hsa-miR-556-3p | - | JAG1     | JAG1     |
| hsa-miR-556-3p | - | KCNJ15   | KCNJ15   |
| hsa-miR-556-3p | - | KCNMA1   | KCNMA1   |
| hsa-miR-556-3p | - | KCNMB3   | KCNMB3   |
| hsa-miR-556-3p | - | KCTD4    | KCTD4    |
| hsa-miR-556-3p | - | KIAA1524 | KIAA1524 |
| hsa-miR-556-3p | - | KIN      | KIN      |
| hsa-miR-556-3p | - | KL       | KL       |
| hsa-miR-556-3p | - | KLF4     | KLF4     |
| hsa-miR-556-3p | - | KLRC2    | KLRC2    |
| hsa-miR-556-3p | - | KRT12    | KRT12    |
| hsa-miR-556-3p | - | KRTCAP3  | KRTCAP3  |

|                |   |          |          |
|----------------|---|----------|----------|
| 3p             |   |          |          |
| hsa-miR-556-3p | - | LAMA3    | LAMA3    |
| hsa-miR-556-3p | - | LAMA4    | LAMA4    |
| hsa-miR-556-3p | - | LDB1     | LDB1     |
| hsa-miR-556-3p | - | LEPR     | LEPR     |
| hsa-miR-556-3p | - | LEPROTL1 | LEPROTL1 |
| hsa-miR-556-3p | - | LPHN3    | LPHN3    |
| hsa-miR-556-3p | - | LRP2     | LRP2     |
| hsa-miR-556-3p | - | LRRC17   | LRRC17   |
| hsa-miR-556-3p | - | LRRC36   | LRRC36   |
| hsa-miR-556-3p | - | LUZP2    | LUZP2    |
| hsa-miR-556-3p | - | LUZP4    | LUZP4    |
| hsa-miR-556-3p | - | LYSMD1   | LYSMD1   |
| hsa-miR-556-3p | - | MAB21L1  | MAB21L1  |
| hsa-miR-556-3p | - | MAGIX    | MAGIX    |
| hsa-miR-556-3p | - | MAP3K5   | MAP3K5   |
| hsa-miR-556-3p | - | MBD5     | MBD5     |
| hsa-miR-556-3p | - | MBTD1    | MBTD1    |
| hsa-miR-556-3p | - | MBTPS2   | MBTPS2   |
| hsa-miR-556-3p | - | MCL1     | MCL1     |
| hsa-miR-556-3p | - | MCOLN3   | MCOLN3   |
| hsa-miR-556-3p | - | MED18    | MED18    |
| hsa-miR-556-3p | - | MED4     | MED4     |
| hsa-miR-556-3p | - | MEF2C    | MEF2C    |
| hsa-miR-556-3p | - | MGST2    | MGST2    |
| hsa-miR-556-3p | - | MICAL2   | MICAL2   |
| hsa-miR-556-3p | - | MLF1     | MLF1     |
| hsa-miR-556-3p | - | MOCS3    | MOCS3    |
| hsa-miR-556-3p | - | MPHOSPH6 | MPHOSPH6 |

|                |   |         |         |
|----------------|---|---------|---------|
| 3p             |   |         |         |
| hsa-miR-556-3p | - | MPND    | MPND    |
| hsa-miR-556-3p | - | MRPL27  | MRPL27  |
| hsa-miR-556-3p | - | MRPL46  | MRPL46  |
| hsa-miR-556-3p | - | MSH2    | MSH2    |
| hsa-miR-556-3p | - | MSR1    | MSR1    |
| hsa-miR-556-3p | - | MTMR1   | MTMR1   |
| hsa-miR-556-3p | - | MYOT    | MYOT    |
| hsa-miR-556-3p | - | NALCN   | NALCN   |
| hsa-miR-556-3p | - | NDUFA5  | NDUFA5  |
| hsa-miR-556-3p | - | NEUROG2 | NEUROG2 |
| hsa-miR-556-3p | - | NEXN    | NEXN    |
| hsa-miR-556-3p | - | NFATC4  | NFATC4  |
| hsa-miR-556-3p | - | NPTN    | NPTN    |
| hsa-miR-556-3p | - | NUDT15  | NUDT15  |
| hsa-miR-556-3p | - | NUP62CL | NUP62CL |
| hsa-miR-556-3p | - | OGT     | OGT     |
| hsa-miR-556-3p | - | OIP5    | OIP5    |
| hsa-miR-556-3p | - | P4HA1   | P4HA1   |
| hsa-miR-556-3p | - | PAQR9   | PAQR9   |
| hsa-miR-556-3p | - | PARP4   | PARP4   |
| hsa-miR-556-3p | - | PAX1    | PAX1    |
| hsa-miR-556-3p | - | PCDH11Y | PCDH11Y |
| hsa-miR-556-3p | - | PCGF5   | PCGF5   |
| hsa-miR-556-3p | - | PCNP    | PCNP    |
| hsa-miR-556-3p | - | PDC     | PDC     |
| hsa-miR-556-3p | - | PDF     | PDF     |
| hsa-miR-556-3p | - | PHC3    | PHC3    |
| hsa-miR-556-3p | - | PHF6    | PHF6    |

|                |   |          |          |
|----------------|---|----------|----------|
| 3p             |   |          |          |
| hsa-miR-556-3p | - | PHTF1    | PHTF1    |
| hsa-miR-556-3p | - | PI4K2B   | PI4K2B   |
| hsa-miR-556-3p | - | PIGY     | PIGY     |
| hsa-miR-556-3p | - | PIM2     | PIM2     |
| hsa-miR-556-3p | - | PKIA     | PKIA     |
| hsa-miR-556-3p | - | PMPCA    | PMPCA    |
| hsa-miR-556-3p | - | PNLIPRP2 | PNLIPRP2 |
| hsa-miR-556-3p | - | PNRC2    | PNRC2    |
| hsa-miR-556-3p | - | PPM1A    | PPM1A    |
| hsa-miR-556-3p | - | PPM1B    | PPM1B    |
| hsa-miR-556-3p | - | PPP1R14C | PPP1R14C |
| hsa-miR-556-3p | - | PPP1R3C  | PPP1R3C  |
| hsa-miR-556-3p | - | PPP3R1   | PPP3R1   |
| hsa-miR-556-3p | - | PRPF38A  | PRPF38A  |
| hsa-miR-556-3p | - | PRSS21   | PRSS21   |
| hsa-miR-556-3p | - | PSG1     | PSG1     |
| hsa-miR-556-3p | - | PSG2     | PSG2     |
| hsa-miR-556-3p | - | PSG6     | PSG6     |
| hsa-miR-556-3p | - | PSG9     | PSG9     |
| hsa-miR-556-3p | - | PSMB5    | PSMB5    |
| hsa-miR-556-3p | - | PSMC6    | PSMC6    |
| hsa-miR-556-3p | - | PSME4    | PSME4    |
| hsa-miR-556-3p | - | PSPC1    | PSPC1    |
| hsa-miR-556-3p | - | PTER     | PTER     |
| hsa-miR-556-3p | - | PTPRB    | PTPRB    |
| hsa-miR-556-3p | - | PTPRF    | PTPRF    |
| hsa-miR-556-3p | - | PTPRM    | PTPRM    |
| hsa-miR-556-   | - | RAB11A   | RAB11A   |

|                |   |         |         |
|----------------|---|---------|---------|
| 3p             |   |         |         |
| hsa-miR-556-3p | - | RAB28   | RAB28   |
| hsa-miR-556-3p | - | RAB32   | RAB32   |
| hsa-miR-556-3p | - | RAD54B  | RAD54B  |
| hsa-miR-556-3p | - | RALGPS1 | RALGPS1 |
| hsa-miR-556-3p | - | RAVER2  | RAVER2  |
| hsa-miR-556-3p | - | RCBTB2  | RCBTB2  |
| hsa-miR-556-3p | - | RETNLB  | RETNLB  |
| hsa-miR-556-3p | - | RIBC1   | RIBC1   |
| hsa-miR-556-3p | - | RLBP1   | RLBP1   |
| hsa-miR-556-3p | - | RNF135  | RNF135  |
| hsa-miR-556-3p | - | RNF214  | RNF214  |
| hsa-miR-556-3p | - | RNF32   | RNF32   |
| hsa-miR-556-3p | - | RNMT    | RNMT    |
| hsa-miR-556-3p | - | ROBO2   | ROBO2   |
| hsa-miR-556-3p | - | RSRC2   | RSRC2   |
| hsa-miR-556-3p | - | SAC3D1  | SAC3D1  |
| hsa-miR-556-3p | - | SAMD9L  | SAMD9L  |
| hsa-miR-556-3p | - | SAP30L  | SAP30L  |
| hsa-miR-556-3p | - | SCN2A   | SCN2A   |
| hsa-miR-556-3p | - | SDAD1   | SDAD1   |
| hsa-miR-556-3p | - | SEC23B  | SEC23B  |
| hsa-miR-556-3p | - | SEMA6D  | SEMA6D  |
| hsa-miR-556-3p | - | SEPT8   | SEPT8   |
| hsa-miR-556-3p | - | SFRS6   | SFRS6   |
| hsa-miR-556-3p | - | SH2D4A  | SH2D4A  |
| hsa-miR-556-3p | - | SIAE    | SIAE    |
| hsa-miR-556-3p | - | SIRT5   | SIRT5   |
| hsa-miR-556-3p | - | SKAP2   | SKAP2   |

|                |   |            |            |
|----------------|---|------------|------------|
| 3p             |   |            |            |
| hsa-miR-556-3p | - | SLC16A12   | SLC16A12   |
| hsa-miR-556-3p | - | SLC35A5    | SLC35A5    |
| hsa-miR-556-3p | - | SLC38A6    | SLC38A6    |
| hsa-miR-556-3p | - | SLITRK2    | SLITRK2    |
| hsa-miR-556-3p | - | SMG5       | SMG5       |
| hsa-miR-556-3p | - | SNCAIP     | SNCAIP     |
| hsa-miR-556-3p | - | SOCS1      | SOCS1      |
| hsa-miR-556-3p | - | SOS2       | SOS2       |
| hsa-miR-556-3p | - | SPACA1     | SPACA1     |
| hsa-miR-556-3p | - | SQRDL      | SQRDL      |
| hsa-miR-556-3p | - | SRD5A1     | SRD5A1     |
| hsa-miR-556-3p | - | SRGN       | SRGN       |
| hsa-miR-556-3p | - | ST6GALNAC2 | ST6GALNAC2 |
| hsa-miR-556-3p | - | STAU1      | STAU1      |
| hsa-miR-556-3p | - | SULT1C4    | SULT1C4    |
| hsa-miR-556-3p | - | SVEP1      | SVEP1      |
| hsa-miR-556-3p | - | TAF1       | TAF1       |
| hsa-miR-556-3p | - | TAF9B      | TAF9B      |
| hsa-miR-556-3p | - | TCEAL2     | TCEAL2     |
| hsa-miR-556-3p | - | TCEAL4     | TCEAL4     |
| hsa-miR-556-3p | - | TCP11L2    | TCP11L2    |
| hsa-miR-556-3p | - | TEK        | TEK        |
| hsa-miR-556-3p | - | TIAM2      | TIAM2      |
| hsa-miR-556-3p | - | TIMM9      | TIMM9      |
| hsa-miR-556-3p | - | TKTL1      | TKTL1      |
| hsa-miR-556-3p | - | TMEFF1     | TMEFF1     |
| hsa-miR-556-3p | - | TMEM161B   | TMEM161B   |
| hsa-miR-556-3p | - | TNFSF9     | TNFSF9     |

|                |   |        |        |
|----------------|---|--------|--------|
| 3p             |   |        |        |
| hsa-miR-556-3p | - | TNR    | TNR    |
| hsa-miR-556-3p | - | TOR1B  | TOR1B  |
| hsa-miR-556-3p | - | TRAF4  | TRAF4  |
| hsa-miR-556-3p | - | TRDN   | TRDN   |
| hsa-miR-556-3p | - | TRIM41 | TRIM41 |
| hsa-miR-556-3p | - | TRPM7  | TRPM7  |
| hsa-miR-556-3p | - | TSPYL4 | TSPYL4 |
| hsa-miR-556-3p | - | TUBD1  | TUBD1  |
| hsa-miR-556-3p | - | TUBE1  | TUBE1  |
| hsa-miR-556-3p | - | TUSC3  | TUSC3  |
| hsa-miR-556-3p | - | TYK2   | TYK2   |
| hsa-miR-556-3p | - | UBE2E1 | UBE2E1 |
| hsa-miR-556-3p | - | UBE3C  | UBE3C  |
| hsa-miR-556-3p | - | ULBP3  | ULBP3  |
| hsa-miR-556-3p | - | USP45  | USP45  |
| hsa-miR-556-3p | - | UTRN   | UTRN   |
| hsa-miR-556-3p | - | VAMP8  | VAMP8  |
| hsa-miR-556-3p | - | VDR    | VDR    |
| hsa-miR-556-3p | - | VPS13B | VPS13B |
| hsa-miR-556-3p | - | VRK3   | VRK3   |
| hsa-miR-556-3p | - | WDR41  | WDR41  |
| hsa-miR-556-3p | - | YBX1   | YBX1   |
| hsa-miR-556-3p | - | YIPF3  | YIPF3  |
| hsa-miR-556-3p | - | ZBTB38 | ZBTB38 |
| hsa-miR-556-3p | - | ZBTB44 | ZBTB44 |
| hsa-miR-556-3p | - | ZC3H14 | ZC3H14 |
| hsa-miR-556-3p | - | ZCRB1  | ZCRB1  |
| hsa-miR-556-3p | - | ZNF160 | ZNF160 |

|                |          |          |          |
|----------------|----------|----------|----------|
| 3p             |          |          |          |
| hsa-miR-556-3p | -        | ZNF248   | ZNF248   |
| hsa-miR-556-3p | -        | ZNF25    | ZNF25    |
| hsa-miR-556-3p | -        | ZNF317   | ZNF317   |
| hsa-miR-556-3p | -        | ZNF330   | ZNF330   |
| hsa-miR-556-3p | -        | ZNF354A  | ZNF354A  |
| hsa-miR-556-3p | -        | ZNF416   | ZNF416   |
| hsa-miR-556-3p | -        | ZNF516   | ZNF516   |
| hsa-miR-556-3p | -        | ZNF582   | ZNF582   |
| hsa-miR-556-3p | -        | ZNF584   | ZNF584   |
| hsa-miR-556-3p | -        | ZNF793   | ZNF793   |
| hsa-miR-556-3p | -        | ZNF8     | ZNF8     |
| hsa-miR-556-3p | -        | ZNF800   | ZNF800   |
| hsa-miR-556-3p | -        | ZZZ3     | ZZZ3     |
| hsa-miR-589    | AASS     | AASS     | -        |
| hsa-miR-589    | ABAT     | ABAT     | -        |
| hsa-miR-589    | ABCC6    | ABCC6    | -        |
| hsa-miR-589    | ABHD4    | ABHD4    | -        |
| hsa-miR-589    | ABLIM3   | ABLIM3   | -        |
| hsa-miR-589    | -        | ACAT1    | ACAT1    |
| hsa-miR-589    | ACER3    | ACER3    | -        |
| hsa-miR-589    | ACOX1    | ACOX1    | -        |
| hsa-miR-589    | ACSL1    | ACSL1    | -        |
| hsa-miR-589    | ACTBL2   | ACTBL2   | -        |
| hsa-miR-589    | ACTN2    | ACTN2    | -        |
| hsa-miR-589    | ACTN3    | ACTN3    | -        |
| hsa-miR-589    | ACTR8    | ACTR8    | -        |
| hsa-miR-589    | ADAMTS14 | -        | ADAMTS14 |
| hsa-miR-589    | ADAMTS18 | ADAMTS18 | -        |
| hsa-miR-589    | ADAMTS3  | ADAMTS3  | -        |
| hsa-miR-589    | ADARB1   | ADARB1   | -        |
| hsa-miR-589    | ADCY2    | ADCY2    | -        |
| hsa-miR-589    | ADCY9    | ADCY9    | -        |
| hsa-miR-589    | ADPRHL1  | ADPRHL1  | -        |
| hsa-miR-589    | ADRA2B   | ADRA2B   | -        |
| hsa-miR-589    | AGBL2    | AGBL2    | -        |
| hsa-miR-589    | AGPAT6   | AGPAT6   | -        |
| hsa-miR-589    | AIMP1    | AIMP1    | -        |
| hsa-miR-589    | AK5      | AK5      | -        |
| hsa-miR-589    | AKAP6    | AKAP6    | -        |



|             |          |          |         |
|-------------|----------|----------|---------|
| hsa-miR-589 | AKIRIN1  | AKIRIN1  | -       |
| hsa-miR-589 | ALDH4A1  | -        | ALDH4A1 |
| hsa-miR-589 | ALG9     | ALG9     | -       |
| hsa-miR-589 | ALKBH5   | ALKBH5   | -       |
| hsa-miR-589 | ALOX5AP  | ALOX5AP  | -       |
| hsa-miR-589 | ALPK1    | ALPK1    | -       |
| hsa-miR-589 | AMPH     | AMPH     | -       |
| hsa-miR-589 | ANKLE2   | ANKLE2   | -       |
| hsa-miR-589 | ANKMY2   | ANKMY2   | -       |
| hsa-miR-589 | -        | ANKRD19  | ANKRD19 |
| hsa-miR-589 | ANKRD28  | ANKRD28  | -       |
| hsa-miR-589 | ANKRD34C | ANKRD34C | -       |
| hsa-miR-589 | ANKRD46  | ANKRD46  | -       |
| hsa-miR-589 | -        | ANKZF1   | ANKZF1  |
| hsa-miR-589 | ANO10    | ANO10    | -       |
| hsa-miR-589 | ANO3     | ANO3     | -       |
| hsa-miR-589 | ANO5     | ANO5     | -       |
| hsa-miR-589 | ANTXR1   | ANTXR1   | -       |
| hsa-miR-589 | AP2B1    | AP2B1    | -       |
| hsa-miR-589 | AP3M2    | AP3M2    | -       |
| hsa-miR-589 | -        | APOL4    | APOL4   |
| hsa-miR-589 | AQP4     | AQP4     | -       |
| hsa-miR-589 | ARFGAP2  | ARFGAP2  | -       |
| hsa-miR-589 | ARFGAP3  | ARFGAP3  | -       |
| hsa-miR-589 | ARFGEF2  | ARFGEF2  | -       |
| hsa-miR-589 | ARHGAP29 | ARHGAP29 | -       |
| hsa-miR-589 | ARHGAP32 | ARHGAP32 | -       |
| hsa-miR-589 | ARL11    | ARL11    | -       |
| hsa-miR-589 | ARL2BP   | ARL2BP   | -       |
| hsa-miR-589 | ARMCX5   | ARMCX5   | -       |
| hsa-miR-589 | ARPC5    | ARPC5    | -       |
| hsa-miR-589 | ARPP19   | ARPP19   | -       |
| hsa-miR-589 | ASAH1    | ASAH1    | -       |
| hsa-miR-589 | ASPH     | ASPH     | -       |
| hsa-miR-589 | ATF7     | ATF7     | -       |
| hsa-miR-589 | -        | ATG4A    | ATG4A   |
| hsa-miR-589 | ATG7     | ATG7     | -       |
| hsa-miR-589 | ATP13A3  | ATP13A3  | -       |
| hsa-miR-589 | ATP2B4   | ATP2B4   | -       |
| hsa-miR-589 | ATP5SL   | ATP5SL   | -       |
| hsa-miR-589 | ATP6V0D2 | ATP6V0D2 | -       |
| hsa-miR-589 | ATP6V1C2 | ATP6V1C2 | -       |
| hsa-miR-589 | ATR      | ATR      | -       |
| hsa-miR-589 | ATXN7L1  | ATXN7L1  | -       |
| hsa-miR-589 | B3GNT1   | B3GNT1   | -       |
| hsa-miR-589 | B3GNT5   | B3GNT5   | -       |
| hsa-miR-589 | B4GALT3  | B4GALT3  | -       |
| hsa-miR-589 | BACE1    | BACE1    | -       |
| hsa-miR-589 | BACH1    | BACH1    | -       |
| hsa-miR-589 | BAG5     | BAG5     | -       |
| hsa-miR-589 | BBX      | BBX      | -       |

|             |           |           |          |
|-------------|-----------|-----------|----------|
| hsa-miR-589 | BCAS1     | BCAS1     | -        |
| hsa-miR-589 | BCL11A    | BCL11A    | -        |
| hsa-miR-589 | BCL6B     | BCL6B     | -        |
| hsa-miR-589 | BDNF      | BDNF      | -        |
| hsa-miR-589 | BET1      | BET1      | -        |
| hsa-miR-589 | -         | BICC1     | BICC1    |
| hsa-miR-589 | BIN2      | BIN2      | -        |
| hsa-miR-589 | BIRC5     | BIRC5     | -        |
| hsa-miR-589 | BMP6      | BMP6      | -        |
| hsa-miR-589 | BPY2      | BPY2      | -        |
| hsa-miR-589 | BRPF3     | BRPF3     | -        |
| hsa-miR-589 | BRWD1     | BRWD1     | -        |
| hsa-miR-589 | BTG2      | BTG2      | -        |
| hsa-miR-589 | BTN2A2    | BTN2A2    | -        |
| hsa-miR-589 | BZRAP1    | -         | BZRAP1   |
| hsa-miR-589 | BZW1      | BZW1      | -        |
| hsa-miR-589 | C11orf34  | C11orf34  | -        |
| hsa-miR-589 | C11orf41  | C11orf41  | -        |
| hsa-miR-589 | -         | C12orf11  | C12orf11 |
| hsa-miR-589 | C12orf51  | C12orf51  | -        |
| hsa-miR-589 | C13orf30  | C13orf30  | -        |
| hsa-miR-589 | C16orf42  | -         | C16orf42 |
| hsa-miR-589 | C16orf52  | C16orf52  | -        |
| hsa-miR-589 | C16orf57  | -         | C16orf57 |
| hsa-miR-589 | C16orf72  | C16orf72  | -        |
| hsa-miR-589 | C17orf105 | C17orf105 | -        |
| hsa-miR-589 | -         | C17orf53  | C17orf53 |
| hsa-miR-589 | C17orf57  | C17orf57  | -        |
| hsa-miR-589 | C17orf63  | C17orf63  | -        |
| hsa-miR-589 | C17orf76  | C17orf76  | -        |
| hsa-miR-589 | C18orf19  | C18orf19  | -        |
| hsa-miR-589 | C18orf32  | C18orf32  | -        |
| hsa-miR-589 | C1QBP     | C1QBP     | -        |
| hsa-miR-589 | C1QTNF8   | C1QTNF8   | -        |
| hsa-miR-589 | C1orf106  | C1orf106  | -        |
| hsa-miR-589 | -         | C1orf128  | C1orf128 |
| hsa-miR-589 | C1orf190  | C1orf190  | -        |
| hsa-miR-589 | -         | C1orf25   | C1orf25  |
| hsa-miR-589 | C21orf62  | C21orf62  | -        |
| hsa-miR-589 | C2CD4C    | C2CD4C    | -        |
| hsa-miR-589 | C2orf42   | C2orf42   | -        |
| hsa-miR-589 | C2orf77   | C2orf77   | -        |
| hsa-miR-589 | C2orf80   | C2orf80   | -        |
| hsa-miR-589 | C3orf17   | C3orf17   | -        |
| hsa-miR-589 | C3orf38   | C3orf38   | -        |
| hsa-miR-589 | C3orf67   | C3orf67   | -        |
| hsa-miR-589 | C4orf3    | C4orf3    | -        |
| hsa-miR-589 | C5orf25   | C5orf25   | -        |
| hsa-miR-589 | C6orf132  | C6orf132  | -        |
| hsa-miR-589 | C7orf31   | C7orf31   | -        |
| hsa-miR-589 | C7orf60   | C7orf60   | -        |

|             |          |          |          |
|-------------|----------|----------|----------|
| hsa-miR-589 | C9orf167 | -        | C9orf167 |
| hsa-miR-589 | C9orf6   | C9orf6   | -        |
| hsa-miR-589 | -        | CABC1    | CABC1    |
| hsa-miR-589 | CACNA1C  | -        | CACNA1C  |
| hsa-miR-589 | CACNA1E  | CACNA1E  | -        |
| hsa-miR-589 | CACNA1H  | -        | CACNA1H  |
| hsa-miR-589 | CADM2    | CADM2    | -        |
| hsa-miR-589 | CADPS2   | CADPS2   | -        |
| hsa-miR-589 | -        | CALCB    | CALCB    |
| hsa-miR-589 | CALM1    | CALM1    | -        |
| hsa-miR-589 | CALM3    | CALM3    | -        |
| hsa-miR-589 | CAMK2A   | -        | CAMK2A   |
| hsa-miR-589 | CAMK2D   | CAMK2D   | -        |
| hsa-miR-589 | CAMTA1   | CAMTA1   | -        |
| hsa-miR-589 | CANT1    | CANT1    | -        |
| hsa-miR-589 | CAPRIN1  | CAPRIN1  | -        |
| hsa-miR-589 | CASP9    | CASP9    | -        |
| hsa-miR-589 | CASZ1    | CASZ1    | -        |
| hsa-miR-589 | CAT      | CAT      | -        |
| hsa-miR-589 | -        | CBR1     | CBR1     |
| hsa-miR-589 | CBX3     | CBX3     | -        |
| hsa-miR-589 | CCDC113  | CCDC113  | -        |
| hsa-miR-589 | CCDC120  | CCDC120  | -        |
| hsa-miR-589 | CCDC126  | CCDC126  | -        |
| hsa-miR-589 | CCDC144A | CCDC144A | -        |
| hsa-miR-589 | CCDC146  | CCDC146  | -        |
| hsa-miR-589 | CCDC39   | CCDC39   | -        |
| hsa-miR-589 | CCDC42   | CCDC42   | -        |
| hsa-miR-589 | CCDC89   | CCDC89   | -        |
| hsa-miR-589 | CCK      | CCK      | -        |
| hsa-miR-589 | CCL5     | CCL5     | -        |
| hsa-miR-589 | CCNA2    | CCNA2    | -        |
| hsa-miR-589 | CD1A     | CD1A     | -        |
| hsa-miR-589 | CD80     | CD80     | -        |
| hsa-miR-589 | CDC27    | CDC27    | -        |
| hsa-miR-589 | CDC37L1  | CDC37L1  | -        |
| hsa-miR-589 | CDC42SE1 | CDC42SE1 | -        |
| hsa-miR-589 | CDCA8    | CDCA8    | -        |
| hsa-miR-589 | CDH11    | CDH11    | -        |
| hsa-miR-589 | CDHR3    | CDHR3    | -        |
| hsa-miR-589 | CDK1     | CDK1     | -        |
| hsa-miR-589 | CDKL2    | CDKL2    | -        |
| hsa-miR-589 | CDS2     | CDS2     | -        |
| hsa-miR-589 | CEBPA    | CEBPA    | -        |
| hsa-miR-589 | CELF2    | CELF2    | -        |
| hsa-miR-589 | CENPO    | CENPO    | -        |
| hsa-miR-589 | CFH      | CFH      | -        |
| hsa-miR-589 | CFHR4    | CFHR4    | -        |
| hsa-miR-589 | CHRM1    | CHRM1    | -        |
| hsa-miR-589 | CHUK     | CHUK     | -        |
| hsa-miR-589 | CIAO1    | CIAO1    | -        |

|             |          |          |         |
|-------------|----------|----------|---------|
| hsa-miR-589 | CLASP2   | CLASP2   | -       |
| hsa-miR-589 | CLEC1A   | CLEC1A   | -       |
| hsa-miR-589 | CLEC2D   | -        | CLEC2D  |
| hsa-miR-589 | CLEC2L   | CLEC2L   | -       |
| hsa-miR-589 | CLEC4M   | CLEC4M   | -       |
| hsa-miR-589 | CLSTN2   | CLSTN2   | -       |
| hsa-miR-589 | CMTM6    | CMTM6    | -       |
| hsa-miR-589 | CNNM1    | CNNM1    | -       |
| hsa-miR-589 | CNNM4    | CNNM4    | -       |
| hsa-miR-589 | CNOT6    | CNOT6    | -       |
| hsa-miR-589 | CNTF     | CNTF     | -       |
| hsa-miR-589 | CNTLN    | CNTLN    | -       |
| hsa-miR-589 | -        | CNTROB   | CNTROB  |
| hsa-miR-589 | COL4A3BP | COL4A3BP | -       |
| hsa-miR-589 | COL9A1   | COL9A1   | -       |
| hsa-miR-589 | COPA     | COPA     | -       |
| hsa-miR-589 | COPS8    | COPS8    | -       |
| hsa-miR-589 | CPLX4    | CPLX4    | -       |
| hsa-miR-589 | CPSF2    | CPSF2    | -       |
| hsa-miR-589 | CRCT1    | -        | CRCT1   |
| hsa-miR-589 | CRHR2    | -        | CRHR2   |
| hsa-miR-589 | CRYZ     | CRYZ     | -       |
| hsa-miR-589 | CSNK1G1  | CSNK1G1  | -       |
| hsa-miR-589 | CSRNP2   | CSRNP2   | -       |
| hsa-miR-589 | -        | CSTF3    | CSTF3   |
| hsa-miR-589 | CTAGE4   | CTAGE4   | -       |
| hsa-miR-589 | CTAGE9   | CTAGE9   | -       |
| hsa-miR-589 | CTDSPL2  | CTDSPL2  | -       |
| hsa-miR-589 | CTNNB1   | CTNNB1   | -       |
| hsa-miR-589 | CTXN3    | CTXN3    | -       |
| hsa-miR-589 | CUL4B    | -        | CUL4B   |
| hsa-miR-589 | CUL5     | CUL5     | -       |
| hsa-miR-589 | CUX1     | CUX1     | -       |
| hsa-miR-589 | CXCR6    | CXCR6    | -       |
| hsa-miR-589 | CXorf1   | CXorf1   | -       |
| hsa-miR-589 | CXorf49  | CXorf49  | -       |
| hsa-miR-589 | CYBRD1   | CYBRD1   | -       |
| hsa-miR-589 | CYP27B1  | CYP27B1  | -       |
| hsa-miR-589 | CYP3A43  | CYP3A43  | -       |
| hsa-miR-589 | -        | CYP4F12  | CYP4F12 |
| hsa-miR-589 | CYTH1    | CYTH1    | -       |
| hsa-miR-589 | DBP      | -        | DBP     |
| hsa-miR-589 | DCAF4L1  | DCAF4L1  | -       |
| hsa-miR-589 | DCAF7    | DCAF7    | -       |
| hsa-miR-589 | DCHS1    | -        | DCHS1   |
| hsa-miR-589 | DCLK2    | DCLK2    | -       |
| hsa-miR-589 | DCLRE1B  | DCLRE1B  | -       |
| hsa-miR-589 | DCP2     | DCP2     | -       |
| hsa-miR-589 | DCTN5    | DCTN5    | -       |
| hsa-miR-589 | -        | DCTN6    | DCTN6   |
| hsa-miR-589 | DCUN1D2  | DCUN1D2  | -       |

|             |          |          |         |
|-------------|----------|----------|---------|
| hsa-miR-589 | DDHD1    | DDHD1    | -       |
| hsa-miR-589 | DDI1     | DDI1     | -       |
| hsa-miR-589 | DDX31    | -        | DDX31   |
| hsa-miR-589 | DEFB132  | DEFB132  | -       |
| hsa-miR-589 | DGKG     | DGKG     | -       |
| hsa-miR-589 | DHFR     | DHFR     | -       |
| hsa-miR-589 | DHFRL1   | DHFRL1   | -       |
| hsa-miR-589 | DIS3L    | DIS3L    | -       |
| hsa-miR-589 | -        | DLEU2L   | DLEU2L  |
| hsa-miR-589 | DLGAP3   | -        | DLGAP3  |
| hsa-miR-589 | DNAJC12  | DNAJC12  | -       |
| hsa-miR-589 | DNAJC16  | DNAJC16  | -       |
| hsa-miR-589 | DNAJC19  | DNAJC19  | -       |
| hsa-miR-589 | DNAJC6   | DNAJC6   | -       |
| hsa-miR-589 | DNAL1    | DNAL1    | -       |
| hsa-miR-589 | DNPEP    | DNPEP    | -       |
| hsa-miR-589 | -        | DNTTIP1  | DNTTIP1 |
| hsa-miR-589 | DOCK1    | DOCK1    | -       |
| hsa-miR-589 | DPAGT1   | DPAGT1   | -       |
| hsa-miR-589 | DPM1     | DPM1     | -       |
| hsa-miR-589 | DPT      | DPT      | -       |
| hsa-miR-589 | DPY19L4  | DPY19L4  | -       |
| hsa-miR-589 | DPYSL2   | DPYSL2   | -       |
| hsa-miR-589 | DR1      | DR1      | -       |
| hsa-miR-589 | DSCAM    | DSCAM    | -       |
| hsa-miR-589 | DTNA     | DTNA     | -       |
| hsa-miR-589 | DUSP19   | DUSP19   | -       |
| hsa-miR-589 | DUSP5    | DUSP5    | -       |
| hsa-miR-589 | DUSP7    | DUSP7    | -       |
| hsa-miR-589 | DYNC1I2  | DYNC1I2  | -       |
| hsa-miR-589 | DYRK2    | DYRK2    | -       |
| hsa-miR-589 | -        | EBF3     | EBF3    |
| hsa-miR-589 | ECSIT    | -        | ECSIT   |
| hsa-miR-589 | EDA2R    | EDA2R    | -       |
| hsa-miR-589 | EDNRB    | EDNRB    | -       |
| hsa-miR-589 | EFCAB1   | EFCAB1   | -       |
| hsa-miR-589 | EFHC1    | -        | EFHC1   |
| hsa-miR-589 | EFNB2    | EFNB2    | -       |
| hsa-miR-589 | EFS      | EFS      | -       |
| hsa-miR-589 | EGR3     | EGR3     | -       |
| hsa-miR-589 | EHMT2    | EHMT2    | -       |
| hsa-miR-589 | EIF4B    | EIF4B    | -       |
| hsa-miR-589 | EIF4G2   | EIF4G2   | -       |
| hsa-miR-589 | ELAC1    | ELAC1    | -       |
| hsa-miR-589 | ELF5     | ELF5     | -       |
| hsa-miR-589 | ELOVL5   | ELOVL5   | -       |
| hsa-miR-589 | ENDOD1   | ENDOD1   | -       |
| hsa-miR-589 | ENSA     | ENSA     | -       |
| hsa-miR-589 | EPB41L4A | EPB41L4A | -       |
| hsa-miR-589 | EPHA10   | EPHA10   | -       |
| hsa-miR-589 | EPHA5    | EPHA5    | -       |

|             |          |          |         |
|-------------|----------|----------|---------|
| hsa-miR-589 | EPS15    | EPS15    | -       |
| hsa-miR-589 | ESPNL    | ESPNL    | -       |
| hsa-miR-589 | ETF1     | ETF1     | -       |
| hsa-miR-589 | ETS2     | ETS2     | -       |
| hsa-miR-589 | -        | EXOSC7   | EXOSC7  |
| hsa-miR-589 | EYA4     | EYA4     | -       |
| hsa-miR-589 | F9       | F9       | -       |
| hsa-miR-589 | FAM102B  | FAM102B  | -       |
| hsa-miR-589 | FAM107B  | FAM107B  | -       |
| hsa-miR-589 | FAM110B  | -        | FAM110B |
| hsa-miR-589 | FAM114A2 | FAM114A2 | -       |
| hsa-miR-589 | FAM123A  | FAM123A  | -       |
| hsa-miR-589 | FAM131C  | FAM131C  | -       |
| hsa-miR-589 | FAM134C  | FAM134C  | -       |
| hsa-miR-589 | FAM13A   | FAM13A   | -       |
| hsa-miR-589 | FAM178A  | FAM178A  | -       |
| hsa-miR-589 | FAM185A  | FAM185A  | -       |
| hsa-miR-589 | FAM20B   | FAM20B   | -       |
| hsa-miR-589 | FAM43A   | FAM43A   | -       |
| hsa-miR-589 | FAM46B   | FAM46B   | -       |
| hsa-miR-589 | FAM57A   | -        | FAM57A  |
| hsa-miR-589 | FAM72A   | FAM72A   | -       |
| hsa-miR-589 | FAM72B   | FAM72B   | -       |
| hsa-miR-589 | FAM72D   | FAM72D   | -       |
| hsa-miR-589 | FAM81A   | FAM81A   | -       |
| hsa-miR-589 | FAM86B2  | FAM86B2  | -       |
| hsa-miR-589 | FANCM    | -        | FANCM   |
| hsa-miR-589 | FAR1     | FAR1     | -       |
| hsa-miR-589 | FBXL18   | FBXL18   | -       |
| hsa-miR-589 | FBXL3    | FBXL3    | -       |
| hsa-miR-589 | FBXO4    | FBXO4    | -       |
| hsa-miR-589 | FBXO40   | FBXO40   | -       |
| hsa-miR-589 | FBXO45   | FBXO45   | -       |
| hsa-miR-589 | FBXW11   | FBXW11   | -       |
| hsa-miR-589 | FCGRT    | -        | FCGRT   |
| hsa-miR-589 | -        | FCRL6    | FCRL6   |
| hsa-miR-589 | FER      | FER      | -       |
| hsa-miR-589 | FLJ25363 | FLJ25363 | -       |
| hsa-miR-589 | FOSB     | FOSB     | -       |
| hsa-miR-589 | FOXQ1    | FOXQ1    | -       |
| hsa-miR-589 | FRAS1    | FRAS1    | -       |
| hsa-miR-589 | -        | FRMD3    | FRMD3   |
| hsa-miR-589 | FRMD4A   | FRMD4A   | -       |
| hsa-miR-589 | FRMD4B   | FRMD4B   | -       |
| hsa-miR-589 | FRMD8    | FRMD8    | -       |
| hsa-miR-589 | FUT3     | FUT3     | -       |
| hsa-miR-589 | FZD3     | FZD3     | -       |
| hsa-miR-589 | FZD5     | -        | FZD5    |
| hsa-miR-589 | G3BP1    | G3BP1    | -       |
| hsa-miR-589 | -        | GABBR1   | GABBR1  |
| hsa-miR-589 | GABRP    | GABRP    | -       |

|             |           |           |         |
|-------------|-----------|-----------|---------|
| hsa-miR-589 | GAD2      | GAD2      | -       |
| hsa-miR-589 | GALC      | GALC      | -       |
| hsa-miR-589 | GALNT10   | -         | GALNT10 |
| hsa-miR-589 | GAPVD1    | GAPVD1    | -       |
| hsa-miR-589 | GCC1      | GCC1      | -       |
| hsa-miR-589 | GCET2     | GCET2     | -       |
| hsa-miR-589 | GCOM1     | GCOM1     | -       |
| hsa-miR-589 | GFAP      | GFAP      | -       |
| hsa-miR-589 | GGA2      | GGA2      | -       |
| hsa-miR-589 | GJB7      | GJB7      | -       |
| hsa-miR-589 | GLRX      | GLRX      | -       |
| hsa-miR-589 | GLT25D2   | GLT25D2   | -       |
| hsa-miR-589 | GLYCTK    | GLYCTK    | -       |
| hsa-miR-589 | GOLGA7    | GOLGA7    | -       |
| hsa-miR-589 | GOSR1     | GOSR1     | -       |
| hsa-miR-589 | GPD1      | GPD1      | -       |
| hsa-miR-589 | GPM6B     | GPM6B     | -       |
| hsa-miR-589 | -         | GPR137    | GPR137  |
| hsa-miR-589 | GPR158    | GPR158    | -       |
| hsa-miR-589 | GPR19     | GPR19     | -       |
| hsa-miR-589 | GPR56     | GPR56     | -       |
| hsa-miR-589 | GPR64     | GPR64     | -       |
| hsa-miR-589 | GPR68     | GPR68     | -       |
| hsa-miR-589 | GPT2      | GPT2      | -       |
| hsa-miR-589 | GRHL2     | GRHL2     | -       |
| hsa-miR-589 | GRIA3     | -         | GRIA3   |
| hsa-miR-589 | GRIK3     | GRIK3     | -       |
| hsa-miR-589 | GRIN2A    | GRIN2A    | -       |
| hsa-miR-589 | GRINL1A   | GRINL1A   | -       |
| hsa-miR-589 | -         | GSTCD     | GSTCD   |
| hsa-miR-589 | GSTM4     | GSTM4     | -       |
| hsa-miR-589 | GTPBP5    | -         | GTPBP5  |
| hsa-miR-589 | GTSF1     | GTSF1     | -       |
| hsa-miR-589 | GUF1      | GUF1      | -       |
| hsa-miR-589 | GYPA      | GYPA      | -       |
| hsa-miR-589 | HAUS3     | HAUS3     | -       |
| hsa-miR-589 | -         | HCLS1     | HCLS1   |
| hsa-miR-589 | HCP5      | HCP5      | -       |
| hsa-miR-589 | HDAC7     | HDAC7     | -       |
| hsa-miR-589 | HDLBP     | -         | HDLBP   |
| hsa-miR-589 | HDX       | HDX       | -       |
| hsa-miR-589 | HEG1      | HEG1      | -       |
| hsa-miR-589 | HEY2      | HEY2      | -       |
| hsa-miR-589 | HHAT      | HHAT      | -       |
| hsa-miR-589 | HINT3     | HINT3     | -       |
| hsa-miR-589 | HIST2H2BE | HIST2H2BE | -       |
| hsa-miR-589 | HJURP     | HJURP     | -       |
| hsa-miR-589 | HK2       | HK2       | -       |
| hsa-miR-589 | HLA-C     | HLA-C     | -       |
| hsa-miR-589 | HLA-DOA   | HLA-DOA   | -       |
| hsa-miR-589 | -         | HLA-J     | HLA-J   |

|             |          |          |          |
|-------------|----------|----------|----------|
| hsa-miR-589 | HLTF     | HLTF     | -        |
| hsa-miR-589 | HMBOX1   | HMBOX1   | -        |
| hsa-miR-589 | HNRNPD   | HNRNPD   | -        |
| hsa-miR-589 | HNRNPH3  | HNRNPH3  | -        |
| hsa-miR-589 | HORMAD2  | HORMAD2  | -        |
| hsa-miR-589 | HS3ST4   | HS3ST4   | -        |
| hsa-miR-589 | HSBP1    | HSBP1    | -        |
| hsa-miR-589 | HTR7     | HTR7     | -        |
| hsa-miR-589 | HTRA3    | -        | HTRA3    |
| hsa-miR-589 | HYDIN    | HYDIN    | -        |
| hsa-miR-589 | ICK      | ICK      | -        |
| hsa-miR-589 | IDS      | IDS      | -        |
| hsa-miR-589 | IER5L    | IER5L    | -        |
| hsa-miR-589 | IFIT5    | IFIT5    | -        |
| hsa-miR-589 | IGF2R    | IGF2R    | -        |
| hsa-miR-589 | IGSF1    | IGSF1    | -        |
| hsa-miR-589 | IGSF9B   | IGSF9B   | -        |
| hsa-miR-589 | IKZF4    | IKZF4    | -        |
| hsa-miR-589 | IL12RB1  | IL12RB1  | -        |
| hsa-miR-589 | IL15RA   | -        | IL15RA   |
| hsa-miR-589 | IL17A    | IL17A    | -        |
| hsa-miR-589 | IL3      | IL3      | -        |
| hsa-miR-589 | -        | IL6      | IL6      |
| hsa-miR-589 | ILF3     | -        | ILF3     |
| hsa-miR-589 | IMPDH1   | IMPDH1   | -        |
| hsa-miR-589 | ING1     | ING1     | -        |
| hsa-miR-589 | INSIG1   | INSIG1   | -        |
| hsa-miR-589 | INTS6    | INTS6    | -        |
| hsa-miR-589 | IQCB1    | IQCB1    | -        |
| hsa-miR-589 | IREB2    | IREB2    | -        |
| hsa-miR-589 | ITCH     | ITCH     | -        |
| hsa-miR-589 | IVD      | IVD      | -        |
| hsa-miR-589 | JAKMIP3  | JAKMIP3  | -        |
| hsa-miR-589 | JMJD6    | JMJD6    | -        |
| hsa-miR-589 | JMJD7    | JMJD7    | -        |
| hsa-miR-589 | KANK1    | KANK1    | -        |
| hsa-miR-589 | KCNC1    | -        | KCNC1    |
| hsa-miR-589 | KCNH5    | KCNH5    | -        |
| hsa-miR-589 | KCNJ10   | KCNJ10   | -        |
| hsa-miR-589 | KCNJ16   | KCNJ16   | -        |
| hsa-miR-589 | KCNK5    | KCNK5    | -        |
| hsa-miR-589 | KCTD10   | KCTD10   | -        |
| hsa-miR-589 | KDM6B    | KDM6B    | -        |
| hsa-miR-589 | KIAA0284 | -        | KIAA0284 |
| hsa-miR-589 | -        | KIAA0652 | KIAA0652 |
| hsa-miR-589 | KIAA0895 | KIAA0895 | -        |
| hsa-miR-589 | KIAA1244 | KIAA1244 | -        |
| hsa-miR-589 | KIAA1274 | KIAA1274 | -        |
| hsa-miR-589 | KIAA1407 | KIAA1407 | -        |
| hsa-miR-589 | KIAA1467 | KIAA1467 | -        |
| hsa-miR-589 | KIAA1609 | -        | KIAA1609 |



|             |           |           |          |
|-------------|-----------|-----------|----------|
| hsa-miR-589 | KIAA1751  | -         | KIAA1751 |
| hsa-miR-589 | KIRREL3   | KIRREL3   | -        |
| hsa-miR-589 | KLF7      | KLF7      | -        |
| hsa-miR-589 | KLHL15    | KLHL15    | -        |
| hsa-miR-589 | KLHL29    | KLHL29    | -        |
| hsa-miR-589 | KLHL31    | KLHL31    | -        |
| hsa-miR-589 | -         | KLRF1     | KLRF1    |
| hsa-miR-589 | KPNA6     | KPNA6     | -        |
| hsa-miR-589 | KRT10     | KRT10     | -        |
| hsa-miR-589 | KRT222    | KRT222    | -        |
| hsa-miR-589 | KRTAP13-1 | KRTAP13-1 | -        |
| hsa-miR-589 | L1CAM     | L1CAM     | -        |
| hsa-miR-589 | -         | LACTB     | LACTB    |
| hsa-miR-589 | LANCL1    | LANCL1    | -        |
| hsa-miR-589 | LATS2     | LATS2     | -        |
| hsa-miR-589 | LCOR      | LCOR      | -        |
| hsa-miR-589 | LHX5      | -         | LHX5     |
| hsa-miR-589 | LIFR      | LIFR      | -        |
| hsa-miR-589 | LIN28B    | LIN28B    | -        |
| hsa-miR-589 | LIPG      | LIPG      | -        |
| hsa-miR-589 | LIX1      | LIX1      | -        |
| hsa-miR-589 | LPAR5     | LPAR5     | -        |
| hsa-miR-589 | LPP       | LPP       | -        |
| hsa-miR-589 | LPPR2     | LPPR2     | -        |
| hsa-miR-589 | LRCH1     | LRCH1     | -        |
| hsa-miR-589 | LRG1      | LRG1      | -        |
| hsa-miR-589 | LRP2      | LRP2      | -        |
| hsa-miR-589 | LRRC18    | -         | LRRC18   |
| hsa-miR-589 | LRRC49    | -         | LRRC49   |
| hsa-miR-589 | LRRC57    | LRRC57    | -        |
| hsa-miR-589 | LRRK1     | -         | LRRK1    |
| hsa-miR-589 | LRRN2     | LRRN2     | -        |
| hsa-miR-589 | LRRN4CL   | LRRN4CL   | -        |
| hsa-miR-589 | LSM14B    | -         | LSM14B   |
| hsa-miR-589 | LUZP2     | LUZP2     | -        |
| hsa-miR-589 | LYPD5     | LYPD5     | -        |
| hsa-miR-589 | LYPLAL1   | LYPLAL1   | -        |
| hsa-miR-589 | LYSMD1    | LYSMD1    | -        |
| hsa-miR-589 | MAB21L2   | MAB21L2   | -        |
| hsa-miR-589 | MAFA      | -         | MAFA     |
| hsa-miR-589 | MAGEL2    | MAGEL2    | -        |
| hsa-miR-589 | MAGI1     | MAGI1     | -        |
| hsa-miR-589 | MAK       | MAK       | -        |
| hsa-miR-589 | MAP2      | MAP2      | -        |
| hsa-miR-589 | MAP2K4    | MAP2K4    | -        |
| hsa-miR-589 | MAP3K14   | MAP3K14   | -        |
| hsa-miR-589 | MAP3K8    | MAP3K8    | -        |
| hsa-miR-589 | MAP7D3    | -         | MAP7D3   |
| hsa-miR-589 | MAPK14    | MAPK14    | -        |
| hsa-miR-589 | MARCH6    | MARCH6    | -        |
| hsa-miR-589 | MARK1     | MARK1     | -        |

|             |         |         |         |
|-------------|---------|---------|---------|
| hsa-miR-589 | MASP1   | MASP1   | -       |
| hsa-miR-589 | MAT2A   | MAT2A   | -       |
| hsa-miR-589 | MBOAT2  | MBOAT2  | -       |
| hsa-miR-589 | MDGA1   | MDGA1   | -       |
| hsa-miR-589 | MEAF6   | MEAF6   | -       |
| hsa-miR-589 | MECR    | MECR    | -       |
| hsa-miR-589 | MED13   | MED13   | -       |
| hsa-miR-589 | MED14   | MED14   | -       |
| hsa-miR-589 | MED20   | MED20   | -       |
| hsa-miR-589 | MEGF8   | MEGF8   | -       |
| hsa-miR-589 | MEOX1   | MEOX1   | -       |
| hsa-miR-589 | METTL7B | METTL7B | -       |
| hsa-miR-589 | METTL9  | METTL9  | -       |
| hsa-miR-589 | MGAT5B  | MGAT5B  | -       |
| hsa-miR-589 | MKI67   | MKI67   | -       |
| hsa-miR-589 | MKRN1   | MKRN1   | -       |
| hsa-miR-589 | MLEC    | MLEC    | -       |
| hsa-miR-589 | MLLT6   | MLLT6   | -       |
| hsa-miR-589 | MMAA    | MMAA    | -       |
| hsa-miR-589 | MOBKL2C | MOBKL2C | -       |
| hsa-miR-589 | MOSC1   | MOSC1   | -       |
| hsa-miR-589 | MOXD1   | MOXD1   | -       |
| hsa-miR-589 | MPP3    | MPP3    | -       |
| hsa-miR-589 | MPP7    | MPP7    | -       |
| hsa-miR-589 | MREG    | MREG    | -       |
| hsa-miR-589 | MRO     | MRO     | -       |
| hsa-miR-589 | MRPL19  | MRPL19  | -       |
| hsa-miR-589 | MRPL22  | MRPL22  | -       |
| hsa-miR-589 | MRPL43  | -       | MRPL43  |
| hsa-miR-589 | MRPS16  | -       | MRPS16  |
| hsa-miR-589 | MRS2    | MRS2    | -       |
| hsa-miR-589 | MRVI1   | MRVI1   | -       |
| hsa-miR-589 | MS4A1   | MS4A1   | -       |
| hsa-miR-589 | MS4A4A  | MS4A4A  | -       |
| hsa-miR-589 | MSL1    | MSL1    | -       |
| hsa-miR-589 | MTG1    | -       | MTG1    |
| hsa-miR-589 | MTR     | MTR     | -       |
| hsa-miR-589 | MTUS2   | MTUS2   | -       |
| hsa-miR-589 | MUTED   | MUTED   | -       |
| hsa-miR-589 | -       | MYBBP1A | MYBBP1A |
| hsa-miR-589 | MYBL1   | MYBL1   | -       |
| hsa-miR-589 | MYO1B   | MYO1B   | -       |
| hsa-miR-589 | MYO1D   | MYO1D   | -       |
| hsa-miR-589 | MYO6    | MYO6    | -       |
| hsa-miR-589 | MYPOP   | MYPOP   | -       |
| hsa-miR-589 | MYT1    | MYT1    | -       |
| hsa-miR-589 | N4BP1   | N4BP1   | -       |
| hsa-miR-589 | NANOS1  | NANOS1  | -       |
| hsa-miR-589 | NARFL   | -       | NARFL   |
| hsa-miR-589 | NBEA    | NBEA    | -       |
| hsa-miR-589 | NBEAL2  | -       | NBEAL2  |

|             |        |        |       |
|-------------|--------|--------|-------|
| hsa-miR-589 | NBR1   | NBR1   | -     |
| hsa-miR-589 | NCCRP1 | NCCRP1 | -     |
| hsa-miR-589 | NCOA7  | NCOA7  | -     |
| hsa-miR-589 | NEURL  | NEURL  | -     |
| hsa-miR-589 | NFASC  | NFASC  | -     |
| hsa-miR-589 | NFIX   | NFIX   | -     |
| hsa-miR-589 | NFKBID | NFKBID | -     |
| hsa-miR-589 | NICN1  | NICN1  | -     |
| hsa-miR-589 | NIN    | NIN    | -     |
| hsa-miR-589 | NIT2   | NIT2   | -     |
| hsa-miR-589 | NKAIN1 | NKAIN1 | -     |
| hsa-miR-589 | NKX3-1 | NKX3-1 | -     |
| hsa-miR-589 | NMU    | NMU    | -     |
| hsa-miR-589 | NOM1   | NOM1   | -     |
| hsa-miR-589 | NOTCH2 | NOTCH2 | -     |
| hsa-miR-589 | NOVA1  | NOVA1  | -     |
| hsa-miR-589 | NRIP3  | NRIP3  | -     |
| hsa-miR-589 | NSD1   | -      | NSD1  |
| hsa-miR-589 | NT5C1B | NT5C1B | -     |
| hsa-miR-589 | NT5DC1 | NT5DC1 | -     |
| hsa-miR-589 | NTRK3  | NTRK3  | -     |
| hsa-miR-589 | NUAK1  | NUAK1  | -     |
| hsa-miR-589 | NUAK2  | NUAK2  | -     |
| hsa-miR-589 | NUDT16 | NUDT16 | -     |
| hsa-miR-589 | NUFIP1 | NUFIP1 | -     |
| hsa-miR-589 | NUMB   | NUMB   | -     |
| hsa-miR-589 | NUPL1  | NUPL1  | -     |
| hsa-miR-589 | NXN    | NXN    | -     |
| hsa-miR-589 | NXPH3  | -      | NXPH3 |
| hsa-miR-589 | OAS2   | OAS2   | -     |
| hsa-miR-589 | P2RY13 | P2RY13 | -     |
| hsa-miR-589 | PACS1  | -      | PACS1 |
| hsa-miR-589 | PAK1   | PAK1   | -     |
| hsa-miR-589 | PAQR8  | PAQR8  | -     |
| hsa-miR-589 | PARD6G | PARD6G | -     |
| hsa-miR-589 | PARK2  | PARK2  | -     |
| hsa-miR-589 | PARVA  | PARVA  | -     |
| hsa-miR-589 | PATE4  | PATE4  | -     |
| hsa-miR-589 | PAX7   | PAX7   | -     |
| hsa-miR-589 | PCDH15 | PCDH15 | -     |
| hsa-miR-589 | PCDH17 | PCDH17 | -     |
| hsa-miR-589 | PCDH19 | PCDH19 | -     |
| hsa-miR-589 | PCM1   | PCM1   | -     |
| hsa-miR-589 | PDGFRA | PDGFRA | -     |
| hsa-miR-589 | PDGFRB | PDGFRB | -     |
| hsa-miR-589 | PDK2   | -      | PDK2  |
| hsa-miR-589 | PDLIM2 | PDLIM2 | -     |
| hsa-miR-589 | PDS5B  | PDS5B  | -     |
| hsa-miR-589 | PDXDC1 | PDXDC1 | -     |
| hsa-miR-589 | PEX13  | PEX13  | -     |
| hsa-miR-589 | PEX2   | PEX2   | -     |

|             |          |          |         |
|-------------|----------|----------|---------|
| hsa-miR-589 | PGAM4    | PGAM4    | -       |
| hsa-miR-589 | PGK2     | PGK2     | -       |
| hsa-miR-589 | PHC2     | -        | PHC2    |
| hsa-miR-589 | PHC3     | PHC3     | -       |
| hsa-miR-589 | PHF14    | PHF14    | -       |
| hsa-miR-589 | PHF20L1  | PHF20L1  | -       |
| hsa-miR-589 | PHF21A   | -        | PHF21A  |
| hsa-miR-589 | PHKB     | PHKB     | -       |
| hsa-miR-589 | PHLPP1   | PHLPP1   | -       |
| hsa-miR-589 | PHOX2B   | PHOX2B   | -       |
| hsa-miR-589 | PI4KB    | PI4KB    | -       |
| hsa-miR-589 | PIK3R2   | PIK3R2   | -       |
| hsa-miR-589 | PIP4K2B  | PIP4K2B  | -       |
| hsa-miR-589 | PIP4K2C  | PIP4K2C  | -       |
| hsa-miR-589 | PIP5K1B  | PIP5K1B  | -       |
| hsa-miR-589 | PITPNB   | PITPNB   | -       |
| hsa-miR-589 | PKN2     | PKN2     | -       |
| hsa-miR-589 | PLA2G2F  | -        | PLA2G2F |
| hsa-miR-589 | PLCXD1   | PLCXD1   | -       |
| hsa-miR-589 | PLCXD3   | PLCXD3   | -       |
| hsa-miR-589 | PLEKHA1  | PLEKHA1  | -       |
| hsa-miR-589 | PLEKHN1  | -        | PLEKHN1 |
| hsa-miR-589 | PLIN2    | PLIN2    | -       |
| hsa-miR-589 | PLP1     | PLP1     | -       |
| hsa-miR-589 | -        | PMCHL2   | PMCHL2  |
| hsa-miR-589 | PML      | PML      | -       |
| hsa-miR-589 | PNPLA4   | PNPLA4   | -       |
| hsa-miR-589 | PNPLA7   | -        | PNPLA7  |
| hsa-miR-589 | PNPLA8   | PNPLA8   | -       |
| hsa-miR-589 | PNPO     | PNPO     | -       |
| hsa-miR-589 | POFUT2   | POFUT2   | -       |
| hsa-miR-589 | POLDIP3  | POLDIP3  | -       |
| hsa-miR-589 | POLR2E   | POLR2E   | -       |
| hsa-miR-589 | POLR3H   | POLR3H   | -       |
| hsa-miR-589 | POM121   | POM121   | -       |
| hsa-miR-589 | POM121C  | POM121C  | -       |
| hsa-miR-589 | POU6F1   | POU6F1   | -       |
| hsa-miR-589 | PPBP     | PPBP     | -       |
| hsa-miR-589 | PPM1A    | PPM1A    | -       |
| hsa-miR-589 | PPM1B    | PPM1B    | -       |
| hsa-miR-589 | PPM1H    | PPM1H    | -       |
| hsa-miR-589 | -        | PPP1CA   | PPP1CA  |
| hsa-miR-589 | PPP1R1A  | PPP1R1A  | -       |
| hsa-miR-589 | PPP2R3A  | PPP2R3A  | -       |
| hsa-miR-589 | PPP2R5E  | PPP2R5E  | -       |
| hsa-miR-589 | PRCP     | PRCP     | -       |
| hsa-miR-589 | PRDM13   | PRDM13   | -       |
| hsa-miR-589 | PRDM2    | PRDM2    | -       |
| hsa-miR-589 | PRDX4    | PRDX4    | -       |
| hsa-miR-589 | PRICKLE2 | PRICKLE2 | -       |
| hsa-miR-589 | PRKAB2   | PRKAB2   | -       |

|             |           |           |        |
|-------------|-----------|-----------|--------|
| hsa-miR-589 | PRKCE     | PRKCE     | -      |
| hsa-miR-589 | PROK1     | PROK1     | -      |
| hsa-miR-589 | PRPH2     | PRPH2     | -      |
| hsa-miR-589 | PSEN1     | PSEN1     | -      |
| hsa-miR-589 | PSMD9     | PSMD9     | -      |
| hsa-miR-589 | PSMG3     | PSMG3     | -      |
| hsa-miR-589 | PTPN11    | PTPN11    | -      |
| hsa-miR-589 | PTPRA     | PTPRA     | -      |
| hsa-miR-589 | PTPRE     | PTPRE     | -      |
| hsa-miR-589 | PTPRJ     | PTPRJ     | -      |
| hsa-miR-589 | PTRF      | PTRF      | -      |
| hsa-miR-589 | PURG      | PURG      | -      |
| hsa-miR-589 | PXN       | PXN       | -      |
| hsa-miR-589 | ProSAPiP1 | ProSAPiP1 | -      |
| hsa-miR-589 | QKI       | QKI       | -      |
| hsa-miR-589 | QRSL1     | QRSL1     | -      |
| hsa-miR-589 | RAB1B     | RAB1B     | -      |
| hsa-miR-589 | RAB3B     | RAB3B     | -      |
| hsa-miR-589 | RAB40C    | RAB40C    | -      |
| hsa-miR-589 | RABGEF1   | RABGEF1   | -      |
| hsa-miR-589 | RAD1      | RAD1      | -      |
| hsa-miR-589 | RAD51     | RAD51     | -      |
| hsa-miR-589 | RALGAPB   | RALGAPB   | -      |
| hsa-miR-589 | RAP2B     | RAP2B     | -      |
| hsa-miR-589 | RAPGEF6   | RAPGEF6   | -      |
| hsa-miR-589 | RARB      | RARB      | -      |
| hsa-miR-589 | RASSF2    | -         | RASSF2 |
| hsa-miR-589 | RAVER2    | RAVER2    | -      |
| hsa-miR-589 | RBM12B    | RBM12B    | -      |
| hsa-miR-589 | RBM25     | RBM25     | -      |
| hsa-miR-589 | RBMX      | RBMX      | -      |
| hsa-miR-589 | RCAN3     | RCAN3     | -      |
| hsa-miR-589 | RCSD1     | RCSD1     | -      |
| hsa-miR-589 | RD3       | RD3       | -      |
| hsa-miR-589 | REEP5     | REEP5     | -      |
| hsa-miR-589 | RELT      | RELT      | -      |
| hsa-miR-589 | RER1      | -         | RER1   |
| hsa-miR-589 | RET       | -         | RET    |
| hsa-miR-589 | RFX2      | RFX2      | -      |
| hsa-miR-589 | -         | RFX4      | RFX4   |
| hsa-miR-589 | RFXAP     | RFXAP     | -      |
| hsa-miR-589 | RGAG1     | RGAG1     | -      |
| hsa-miR-589 | RGS5      | RGS5      | -      |
| hsa-miR-589 | RGS6      | RGS6      | -      |
| hsa-miR-589 | RHOXF2    | RHOXF2    | -      |
| hsa-miR-589 | RHOXF2B   | RHOXF2B   | -      |
| hsa-miR-589 | RILPL2    | RILPL2    | -      |
| hsa-miR-589 | RIMS2     | RIMS2     | -      |
| hsa-miR-589 | RNASEL    | RNASEL    | -      |
| hsa-miR-589 | RNF114    | RNF114    | -      |
| hsa-miR-589 | RNF165    | RNF165    | -      |

|             |          |          |         |
|-------------|----------|----------|---------|
| hsa-miR-589 | RNF212   | RNF212   | -       |
| hsa-miR-589 | RNF222   | RNF222   | -       |
| hsa-miR-589 | RNLS     | RNLS     | -       |
| hsa-miR-589 | RNMT     | RNMT     | -       |
| hsa-miR-589 | ROBO1    | ROBO1    | -       |
| hsa-miR-589 | ROR1     | ROR1     | -       |
| hsa-miR-589 | RP1L1    | RP1L1    | -       |
| hsa-miR-589 | RPS6KA2  | -        | RPS6KA2 |
| hsa-miR-589 | RRAGA    | RRAGA    | -       |
| hsa-miR-589 | RSPO4    | -        | RSPO4   |
| hsa-miR-589 | RTN3     | RTN3     | -       |
| hsa-miR-589 | RUFY2    | RUFY2    | -       |
| hsa-miR-589 | RUNDC3B  | RUNDC3B  | -       |
| hsa-miR-589 | RUNX2    | RUNX2    | -       |
| hsa-miR-589 | SAA2     | SAA2     | -       |
| hsa-miR-589 | SAMD4B   | SAMD4B   | -       |
| hsa-miR-589 | SAMD9L   | SAMD9L   | -       |
| hsa-miR-589 | SAP30L   | SAP30L   | -       |
| hsa-miR-589 | SAR1A    | SAR1A    | -       |
| hsa-miR-589 | SASH1    | SASH1    | -       |
| hsa-miR-589 | -        | SCAMP2   | SCAMP2  |
| hsa-miR-589 | SCD      | SCD      | -       |
| hsa-miR-589 | SCN3B    | SCN3B    | -       |
| hsa-miR-589 | SCP2     | SCP2     | -       |
| hsa-miR-589 | SDC1     | SDC1     | -       |
| hsa-miR-589 | SDR42E1  | SDR42E1  | -       |
| hsa-miR-589 | SEC14L4  | SEC14L4  | -       |
| hsa-miR-589 | SEC22C   | -        | SEC22C  |
| hsa-miR-589 | SEC23IP  | SEC23IP  | -       |
| hsa-miR-589 | SEC61A1  | SEC61A1  | -       |
| hsa-miR-589 | SEH1L    | SEH1L    | -       |
| hsa-miR-589 | SELM     | SELM     | -       |
| hsa-miR-589 | -        | SEMA5B   | SEMA5B  |
| hsa-miR-589 | SEPT1    | -        | SEPT1   |
| hsa-miR-589 | SERBP1   | SERBP1   | -       |
| hsa-miR-589 | SERPINB2 | SERPINB2 | -       |
| hsa-miR-589 | SERTAD2  | SERTAD2  | -       |
| hsa-miR-589 | SET      | SET      | -       |
| hsa-miR-589 | SFXN1    | SFXN1    | -       |
| hsa-miR-589 | SHISA9   | SHISA9   | -       |
| hsa-miR-589 | SIAH2    | SIAH2    | -       |
| hsa-miR-589 | SIDT1    | SIDT1    | -       |
| hsa-miR-589 | SIN3A    | SIN3A    | -       |
| hsa-miR-589 | SIPA1L3  | SIPA1L3  | -       |
| hsa-miR-589 | SIRPB1   | SIRPB1   | -       |
| hsa-miR-589 | -        | SIRPB2   | SIRPB2  |
| hsa-miR-589 | SIRPG    | SIRPG    | -       |
| hsa-miR-589 | SIT1     | SIT1     | -       |
| hsa-miR-589 | SKP1     | SKP1     | -       |
| hsa-miR-589 | SLA2     | SLA2     | -       |
| hsa-miR-589 | SLC11A1  | SLC11A1  | -       |

|             |          |          |         |
|-------------|----------|----------|---------|
| hsa-miR-589 | SLC12A6  | SLC12A6  | -       |
| hsa-miR-589 | SLC24A4  | SLC24A4  | -       |
| hsa-miR-589 | SLC25A38 | SLC25A38 | -       |
| hsa-miR-589 | SLC25A44 | SLC25A44 | -       |
| hsa-miR-589 | SLC30A6  | SLC30A6  | -       |
| hsa-miR-589 | SLC30A8  | SLC30A8  | -       |
| hsa-miR-589 | SLC35E3  | SLC35E3  | -       |
| hsa-miR-589 | SLC35F1  | SLC35F1  | -       |
| hsa-miR-589 | SLC38A1  | SLC38A1  | -       |
| hsa-miR-589 | SLC38A4  | SLC38A4  | -       |
| hsa-miR-589 | SLC4A5   | SLC4A5   | -       |
| hsa-miR-589 | SLC6A15  | SLC6A15  | -       |
| hsa-miR-589 | SLC7A1   | SLC7A1   | -       |
| hsa-miR-589 | SLCO2B1  | -        | SLCO2B1 |
| hsa-miR-589 | SLFN5    | SLFN5    | -       |
| hsa-miR-589 | SMCR7L   | SMCR7L   | -       |
| hsa-miR-589 | SMU1     | SMU1     | -       |
| hsa-miR-589 | SNPH     | SNPH     | -       |
| hsa-miR-589 | SNRNP27  | SNRNP27  | -       |
| hsa-miR-589 | SNX1     | SNX1     | -       |
| hsa-miR-589 | SNX31    | SNX31    | -       |
| hsa-miR-589 | SNX5     | SNX5     | -       |
| hsa-miR-589 | SORCS1   | SORCS1   | -       |
| hsa-miR-589 | SORT1    | SORT1    | -       |
| hsa-miR-589 | SOX6     | SOX6     | -       |
| hsa-miR-589 | SOX7     | SOX7     | -       |
| hsa-miR-589 | SP100    | SP100    | -       |
| hsa-miR-589 | SPACA1   | SPACA1   | -       |
| hsa-miR-589 | SPAG8    | SPAG8    | -       |
| hsa-miR-589 | SPATA5   | -        | SPATA5  |
| hsa-miR-589 | SPIN3    | SPIN3    | -       |
| hsa-miR-589 | SPINLW1  | SPINLW1  | -       |
| hsa-miR-589 | SPINT1   | SPINT1   | -       |
| hsa-miR-589 | SPOP     | SPOP     | -       |
| hsa-miR-589 | SPTB     | -        | SPTB    |
| hsa-miR-589 | SPTBN1   | SPTBN1   | -       |
| hsa-miR-589 | SRGAP1   | SRGAP1   | -       |
| hsa-miR-589 | SRXN1    | SRXN1    | -       |
| hsa-miR-589 | SSNA1    | -        | SSNA1   |
| hsa-miR-589 | SSR3     | SSR3     | -       |
| hsa-miR-589 | SSTR1    | SSTR1    | -       |
| hsa-miR-589 | STAC3    | -        | STAC3   |
| hsa-miR-589 | STEAP4   | STEAP4   | -       |
| hsa-miR-589 | STIM2    | STIM2    | -       |
| hsa-miR-589 | STK10    | STK10    | -       |
| hsa-miR-589 | -        | STK19    | STK19   |
| hsa-miR-589 | STK3     | STK3     | -       |
| hsa-miR-589 | STOML1   | STOML1   | -       |
| hsa-miR-589 | STRA13   | STRA13   | -       |
| hsa-miR-589 | STX12    | STX12    | -       |
| hsa-miR-589 | STX17    | STX17    | -       |

|             |                     |                     |          |
|-------------|---------------------|---------------------|----------|
| hsa-miR-589 | SUCLG2              | SUCLG2              | -        |
| hsa-miR-589 | SUPT16H             | SUPT16H             | -        |
| hsa-miR-589 | SUSD5               | SUSD5               | -        |
| hsa-miR-589 | SUV39H1             | SUV39H1             | -        |
| hsa-miR-589 | SVEP1               | SVEP1               | -        |
| hsa-miR-589 | SVOP                | SVOP                | -        |
| hsa-miR-589 | SYN1                | SYN1                | -        |
| hsa-miR-589 | SYNCRIP             | -                   | SYNCRIP  |
| hsa-miR-589 | SYNJ2BP             | SYNJ2BP             | -        |
| hsa-miR-589 | SYT12               | SYT12               | -        |
| hsa-miR-589 | SYT9                | SYT9                | -        |
| hsa-miR-589 | TAB3                | TAB3                | -        |
| hsa-miR-589 | TASP1               | TASP1               | -        |
| hsa-miR-589 | TATDN2              | TATDN2              | -        |
| hsa-miR-589 | TBC1D10B            | TBC1D10B            | -        |
| hsa-miR-589 | TBC1D28             | TBC1D28             | -        |
| hsa-miR-589 | TBX3                | TBX3                | -        |
| hsa-miR-589 | TCF3                | TCF3                | -        |
| hsa-miR-589 | -                   | TDRD1               | TDRD1    |
| hsa-miR-589 | TDRKH               | TDRKH               | -        |
| hsa-miR-589 | TEF                 | TEF                 | -        |
| hsa-miR-589 | TET3                | TET3                | -        |
| hsa-miR-589 | TGFBR2              | TGFBR2              | -        |
| hsa-miR-589 | THPO                | THPO                | -        |
| hsa-miR-589 | THRB                | THRB                | -        |
| hsa-miR-589 | THTPA               | THTPA               | -        |
| hsa-miR-589 | THUMPD1             | THUMPD1             | -        |
| hsa-miR-589 | TIMM17B             | -                   | TIMM17B  |
| hsa-miR-589 | TIMP2               | TIMP2               | -        |
| hsa-miR-589 | TLN2                | TLN2                | -        |
| hsa-miR-589 | TM9SF2              | TM9SF2              | -        |
| hsa-miR-589 | TMC8                | TMC8                | -        |
| hsa-miR-589 | TMED3               | TMED3               | -        |
| hsa-miR-589 | TMEM100             | TMEM100             | -        |
| hsa-miR-589 | TMEM108             | TMEM108             | -        |
| hsa-miR-589 | TMEM109             | TMEM109             | -        |
| hsa-miR-589 | TMEM130             | TMEM130             | -        |
| hsa-miR-589 | TMEM132D            | -                   | TMEM132D |
| hsa-miR-589 | TMEM135             | TMEM135             | -        |
| hsa-miR-589 | TMEM185B            | TMEM185B            | -        |
| hsa-miR-589 | TMEM188             | TMEM188             | -        |
| hsa-miR-589 | TMEM229B            | TMEM229B            | -        |
| hsa-miR-589 | TMEM39A             | TMEM39A             | -        |
| hsa-miR-589 | -                   | TMEM53              | TMEM53   |
| hsa-miR-589 | TMEM56              | TMEM56              | -        |
| hsa-miR-589 | TMEM87A             | TMEM87A             | -        |
| hsa-miR-589 | TMPRSS13            | TMPRSS13            | -        |
| hsa-miR-589 | TMTC1               | TMTC1               | -        |
| hsa-miR-589 | TNFAIP2             | -                   | TNFAIP2  |
| hsa-miR-589 | TNFSF12-<br>TNFSF13 | TNFSF12-<br>TNFSF13 | -        |



|             |          |          |         |
|-------------|----------|----------|---------|
| hsa-miR-589 | TNFSF13  | TNFSF13  | -       |
| hsa-miR-589 | TNNT1    | TNNT1    | -       |
| hsa-miR-589 | TNS4     | TNS4     | -       |
| hsa-miR-589 | TOR1A    | TOR1A    | -       |
| hsa-miR-589 | TOR1AIP2 | TOR1AIP2 | -       |
| hsa-miR-589 | TOR1B    | TOR1B    | -       |
| hsa-miR-589 | TOX      | TOX      | -       |
| hsa-miR-589 | TPCN2    | TPCN2    | -       |
| hsa-miR-589 | TPK1     | TPK1     | -       |
| hsa-miR-589 | TRAF2    | -        | TRAF2   |
| hsa-miR-589 | TRAF6    | TRAF6    | -       |
| hsa-miR-589 | TRANK1   | TRANK1   | -       |
| hsa-miR-589 | TRDMT1   | TRDMT1   | -       |
| hsa-miR-589 | TRIL     | TRIL     | -       |
| hsa-miR-589 | TRIM17   | -        | TRIM17  |
| hsa-miR-589 | TRIM27   | TRIM27   | -       |
| hsa-miR-589 | TRIM44   | TRIM44   | -       |
| hsa-miR-589 | -        | TRIM49   | TRIM49  |
| hsa-miR-589 | TRIM5    | TRIM5    | -       |
| hsa-miR-589 | TRIM6    | TRIM6    | -       |
| hsa-miR-589 | -        | TRIM62   | TRIM62  |
| hsa-miR-589 | TRIT1    | TRIT1    | -       |
| hsa-miR-589 | TRNAU1AP | TRNAU1AP | -       |
| hsa-miR-589 | TRPS1    | TRPS1    | -       |
| hsa-miR-589 | TSC22D1  | TSC22D1  | -       |
| hsa-miR-589 | TSEN2    | TSEN2    | -       |
| hsa-miR-589 | TSFM     | TSFM     | -       |
| hsa-miR-589 | TSHZ2    | -        | TSHZ2   |
| hsa-miR-589 | TSN      | TSN      | -       |
| hsa-miR-589 | TSPAN18  | -        | TSPAN18 |
| hsa-miR-589 | TSSK1B   | TSSK1B   | -       |
| hsa-miR-589 | TTC14    | TTC14    | -       |
| hsa-miR-589 | TTC31    | TTC31    | -       |
| hsa-miR-589 | TTC39A   | TTC39A   | -       |
| hsa-miR-589 | TTL      | TTL      | -       |
| hsa-miR-589 | TTPA     | TTPA     | -       |
| hsa-miR-589 | TTPAL    | TTPAL    | -       |
| hsa-miR-589 | TUBA3E   | -        | TUBA3E  |
| hsa-miR-589 | TUBB1    | TUBB1    | -       |
| hsa-miR-589 | TXK      | TXK      | -       |
| hsa-miR-589 | TXNL4B   | TXNL4B   | -       |
| hsa-miR-589 | UBE2W    | UBE2W    | -       |
| hsa-miR-589 | UCP3     | UCP3     | -       |
| hsa-miR-589 | UMPS     | UMPS     | -       |
| hsa-miR-589 | UNC5D    | UNC5D    | -       |
| hsa-miR-589 | UPB1     | UPB1     | -       |
| hsa-miR-589 | UPP2     | UPP2     | -       |
| hsa-miR-589 | URB2     | URB2     | -       |
| hsa-miR-589 | USP3     | USP3     | -       |
| hsa-miR-589 | USP30    | -        | USP30   |
| hsa-miR-589 | -        | USP34    | USP34   |

|             |         |         |        |
|-------------|---------|---------|--------|
| hsa-miR-589 | -       | USP36   | USP36  |
| hsa-miR-589 | USP38   | USP38   | -      |
| hsa-miR-589 | USP54   | USP54   | -      |
| hsa-miR-589 | UTRN    | UTRN    | -      |
| hsa-miR-589 | VCPIP1  | VCPIP1  | -      |
| hsa-miR-589 | VEZT    | VEZT    | -      |
| hsa-miR-589 | VPS13D  | VPS13D  | -      |
| hsa-miR-589 | VPS54   | VPS54   | -      |
| hsa-miR-589 | VTI1A   | VTI1A   | -      |
| hsa-miR-589 | WDR33   | WDR33   | -      |
| hsa-miR-589 | WDR4    | WDR4    | -      |
| hsa-miR-589 | WDR47   | WDR47   | -      |
| hsa-miR-589 | -       | WDR8    | WDR8   |
| hsa-miR-589 | WHSC1   | WHSC1   | -      |
| hsa-miR-589 | WISP1   | WISP1   | -      |
| hsa-miR-589 | WNK3    | WNK3    | -      |
| hsa-miR-589 | WNT5A   | WNT5A   | -      |
| hsa-miR-589 | XDH     | XDH     | -      |
| hsa-miR-589 | YES1    | YES1    | -      |
| hsa-miR-589 | YPEL2   | YPEL2   | -      |
| hsa-miR-589 | YTHDF3  | YTHDF3  | -      |
| hsa-miR-589 | ZBTB2   | ZBTB2   | -      |
| hsa-miR-589 | ZBTB24  | ZBTB24  | -      |
| hsa-miR-589 | ZBTB49  | ZBTB49  | -      |
| hsa-miR-589 | ZC3H18  | ZC3H18  | -      |
| hsa-miR-589 | ZC4H2   | ZC4H2   | -      |
| hsa-miR-589 | ZDHHC17 | ZDHHC17 | -      |
| hsa-miR-589 | ZDHHC23 | ZDHHC23 | -      |
| hsa-miR-589 | ZDHHC7  | ZDHHC7  | -      |
| hsa-miR-589 | ZDHHC9  | ZDHHC9  | -      |
| hsa-miR-589 | ZEB1    | ZEB1    | -      |
| hsa-miR-589 | ZFHX3   | ZFHX3   | -      |
| hsa-miR-589 | ZFYVE1  | ZFYVE1  | -      |
| hsa-miR-589 | ZHX1    | ZHX1    | -      |
| hsa-miR-589 | ZHX3    | -       | ZHX3   |
| hsa-miR-589 | ZMAT2   | ZMAT2   | -      |
| hsa-miR-589 | ZMYM4   | ZMYM4   | -      |
| hsa-miR-589 | ZNF148  | ZNF148  | -      |
| hsa-miR-589 | ZNF167  | ZNF167  | -      |
| hsa-miR-589 | ZNF250  | ZNF250  | -      |
| hsa-miR-589 | ZNF253  | ZNF253  | -      |
| hsa-miR-589 | ZNF282  | -       | ZNF282 |
| hsa-miR-589 | ZNF317  | ZNF317  | -      |
| hsa-miR-589 | ZNF324B | ZNF324B | -      |
| hsa-miR-589 | ZNF346  | ZNF346  | -      |
| hsa-miR-589 | ZNF41   | ZNF41   | -      |
| hsa-miR-589 | ZNF420  | ZNF420  | -      |
| hsa-miR-589 | ZNF467  | ZNF467  | -      |
| hsa-miR-589 | ZNF473  | ZNF473  | -      |
| hsa-miR-589 | ZNF501  | ZNF501  | -      |
| hsa-miR-589 | ZNF506  | ZNF506  | -      |

|             |          |          |         |
|-------------|----------|----------|---------|
| hsa-miR-589 | ZNF528   | ZNF528   | -       |
| hsa-miR-589 | ZNF540   | ZNF540   | -       |
| hsa-miR-589 | -        | ZNF541   | ZNF541  |
| hsa-miR-589 | ZNF562   | ZNF562   | -       |
| hsa-miR-589 | ZNF585B  | -        | ZNF585B |
| hsa-miR-589 | ZNF605   | ZNF605   | -       |
| hsa-miR-589 | ZNF619   | ZNF619   | -       |
| hsa-miR-589 | ZNF644   | ZNF644   | -       |
| hsa-miR-589 | ZNF649   | ZNF649   | -       |
| hsa-miR-589 | ZNF691   | ZNF691   | -       |
| hsa-miR-589 | ZNF697   | ZNF697   | -       |
| hsa-miR-589 | ZNF716   | ZNF716   | -       |
| hsa-miR-589 | ZNF829   | ZNF829   | -       |
| hsa-miR-589 | ZNF90    | ZNF90    | -       |
| hsa-miR-589 | ZNRF3    | ZNRF3    | -       |
| hsa-miR-589 | ZZEF1    | ZZEF1    | -       |
| hsa-miR-637 | ABCA2    | -        | ABCA2   |
| hsa-miR-637 | ABCB8    | -        | ABCB8   |
| hsa-miR-637 | ABCC10   | -        | ABCC10  |
| hsa-miR-637 | ABCC11   | -        | ABCC11  |
| hsa-miR-637 | ABCD1    | ABCD1    | -       |
| hsa-miR-637 | ABCF1    | ABCF1    | -       |
| hsa-miR-637 | ABCF2    | ABCF2    | -       |
| hsa-miR-637 | ABCG4    | ABCG4    | -       |
| hsa-miR-637 | ABHD12B  | ABHD12B  | -       |
| hsa-miR-637 | ABHD14B  | ABHD14B  | -       |
| hsa-miR-637 | ABHD2    | ABHD2    | -       |
| hsa-miR-637 | ABHD4    | ABHD4    | -       |
| hsa-miR-637 | ABHD6    | ABHD6    | -       |
| hsa-miR-637 | ABLIM1   | ABLIM1   | -       |
| hsa-miR-637 | ABP1     | -        | ABP1    |
| hsa-miR-637 | ABR      | ABR      | -       |
| hsa-miR-637 | ABT1     | ABT1     | -       |
| hsa-miR-637 | ACADS    | -        | ACADS   |
| hsa-miR-637 | -        | ACADVL   | ACADVL  |
| hsa-miR-637 | ACCN1    | ACCN1    | -       |
| hsa-miR-637 | ACCN2    | -        | ACCN2   |
| hsa-miR-637 | ACER3    | ACER3    | -       |
| hsa-miR-637 | ACPP     | ACPP     | -       |
| hsa-miR-637 | ACPT     | -        | ACPT    |
| hsa-miR-637 | ACSS1    | ACSS1    | -       |
| hsa-miR-637 | ACTC1    | ACTC1    | -       |
| hsa-miR-637 | ACTR2    | ACTR2    | -       |
| hsa-miR-637 | ACVRL1   | -        | ACVRL1  |
| hsa-miR-637 | ADAM12   | ADAM12   | -       |
| hsa-miR-637 | ADAMTS10 | ADAMTS10 | -       |
| hsa-miR-637 | ADAMTS6  | ADAMTS6  | -       |
| hsa-miR-637 | ADAMTSL2 | ADAMTSL2 | -       |
| hsa-miR-637 | ADARB1   | -        | ADARB1  |
| hsa-miR-637 | ADCY1    | ADCY1    | -       |
| hsa-miR-637 | ADD2     | ADD2     | -       |

|             |           |           |        |
|-------------|-----------|-----------|--------|
| hsa-miR-637 | ADHFE1    | ADHFE1    | -      |
| hsa-miR-637 | ADRA2B    | ADRA2B    | -      |
| hsa-miR-637 | ADRBK1    | ADRBK1    | -      |
| hsa-miR-637 | ADRBK2    | ADRBK2    | -      |
| hsa-miR-637 | AEN       | AEN       | -      |
| hsa-miR-637 | AFMID     | AFMID     | -      |
| hsa-miR-637 | AGAP3     | AGAP3     | -      |
| hsa-miR-637 | AGPAT2    | AGPAT2    | -      |
| hsa-miR-637 | AGPAT6    | AGPAT6    | -      |
| hsa-miR-637 | AGT       | AGT       | -      |
| hsa-miR-637 | -         | AGXT      | AGXT   |
| hsa-miR-637 | AIFM2     | AIFM2     | -      |
| hsa-miR-637 | AIPL1     | AIPL1     | -      |
| hsa-miR-637 | AK5       | AK5       | -      |
| hsa-miR-637 | AKAP5     | AKAP5     | -      |
| hsa-miR-637 | AKR1E2    | AKR1E2    | -      |
| hsa-miR-637 | AKT3      | AKT3      | -      |
| hsa-miR-637 | ALDH3B2   | ALDH3B2   | -      |
| hsa-miR-637 | ALG13     | ALG13     | -      |
| hsa-miR-637 | ALG9      | ALG9      | -      |
| hsa-miR-637 | -         | ALKBH6    | ALKBH6 |
| hsa-miR-637 | ALKBH7    | ALKBH7    | -      |
| hsa-miR-637 | ALOX12    | ALOX12    | -      |
| hsa-miR-637 | ALPI      | -         | ALPI   |
| hsa-miR-637 | ALX3      | ALX3      | -      |
| hsa-miR-637 | ALX4      | ALX4      | -      |
| hsa-miR-637 | AMACR     | AMACR     | -      |
| hsa-miR-637 | AMMECR1   | AMMECR1   | -      |
| hsa-miR-637 | AMOTL2    | AMOTL2    | -      |
| hsa-miR-637 | ANAPC7    | ANAPC7    | -      |
| hsa-miR-637 | ANGPTL2   | ANGPTL2   | -      |
| hsa-miR-637 | ANKFY1    | ANKFY1    | -      |
| hsa-miR-637 | ANKLE1    | ANKLE1    | -      |
| hsa-miR-637 | ANKRD1    | ANKRD1    | -      |
| hsa-miR-637 | ANKRD13B  | ANKRD13B  | -      |
| hsa-miR-637 | ANKRD20A2 | ANKRD20A2 | -      |
| hsa-miR-637 | ANKRD20A3 | ANKRD20A3 | -      |
| hsa-miR-637 | ANKRD20A4 | ANKRD20A4 | -      |
| hsa-miR-637 | ANKRD28   | ANKRD28   | -      |
| hsa-miR-637 | ANKRD34A  | ANKRD34A  | -      |
| hsa-miR-637 | ANKRD6    | ANKRD6    | -      |
| hsa-miR-637 | ANO7      | ANO7      | -      |
| hsa-miR-637 | ANTXR1    | ANTXR1    | -      |
| hsa-miR-637 | AOC3      | AOC3      | -      |
| hsa-miR-637 | AP1S1     | AP1S1     | -      |
| hsa-miR-637 | AP3M1     | AP3M1     | -      |
| hsa-miR-637 | APCDD1L   | APCDD1L   | -      |
| hsa-miR-637 | APLN      | APLN      | -      |
| hsa-miR-637 | APLNR     | APLNR     | -      |
| hsa-miR-637 | APLP1     | -         | APLP1  |
| hsa-miR-637 | APOBEC3C  | APOBEC3C  | -      |

|             |          |          |         |
|-------------|----------|----------|---------|
| hsa-miR-637 | APOBEC3F | APOBEC3F | -       |
| hsa-miR-637 | -        | AQP7     | AQP7    |
| hsa-miR-637 | AQP9     | AQP9     | -       |
| hsa-miR-637 | ARC      | ARC      | -       |
| hsa-miR-637 | ARCN1    | ARCN1    | -       |
| hsa-miR-637 | ARF4     | ARF4     | -       |
| hsa-miR-637 | ARFGAP2  | ARFGAP2  | -       |
| hsa-miR-637 | ARFIP1   | ARFIP1   | -       |
| hsa-miR-637 | ARHGAP27 | ARHGAP27 | -       |
| hsa-miR-637 | ARHGAP33 | ARHGAP33 | -       |
| hsa-miR-637 | ARHGAP39 | ARHGAP39 | -       |
| hsa-miR-637 | ARHGEF16 | ARHGEF16 | -       |
| hsa-miR-637 | ARHGEF4  | ARHGEF4  | -       |
| hsa-miR-637 | ARHGEF6  | ARHGEF6  | -       |
| hsa-miR-637 | ARID2    | ARID2    | -       |
| hsa-miR-637 | ARID3B   | ARID3B   | -       |
| hsa-miR-637 | ARID5A   | -        | ARID5A  |
| hsa-miR-637 | ARL8B    | ARL8B    | -       |
| hsa-miR-637 | ARMC6    | ARMC6    | -       |
| hsa-miR-637 | ARNT     | ARNT     | -       |
| hsa-miR-637 | ARNT2    | ARNT2    | -       |
| hsa-miR-637 | ARSA     | ARSA     | -       |
| hsa-miR-637 | ARSB     | ARSB     | -       |
| hsa-miR-637 | ARVCF    | -        | ARVCF   |
| hsa-miR-637 | ARX      | ARX      | -       |
| hsa-miR-637 | ASAP1    | ASAP1    | -       |
| hsa-miR-637 | ASAP3    | ASAP3    | -       |
| hsa-miR-637 | ASB5     | ASB5     | -       |
| hsa-miR-637 | ASCC2    | ASCC2    | -       |
| hsa-miR-637 | ASH1L    | ASH1L    | -       |
| hsa-miR-637 | ASMTL    | ASMTL    | -       |
| hsa-miR-637 | ATAD3A   | ATAD3A   | -       |
| hsa-miR-637 | ATF3     | ATF3     | -       |
| hsa-miR-637 | ATF6B    | ATF6B    | -       |
| hsa-miR-637 | ATG9A    | -        | ATG9A   |
| hsa-miR-637 | ATM      | ATM      | -       |
| hsa-miR-637 | ATP10A   | -        | ATP10A  |
| hsa-miR-637 | -        | ATP13A2  | ATP13A2 |
| hsa-miR-637 | ATP5D    | ATP5D    | -       |
| hsa-miR-637 | ATP6V0C  | -        | ATP6V0C |
| hsa-miR-637 | ATP6V1A  | ATP6V1A  | -       |
| hsa-miR-637 | ATP8B3   | ATP8B3   | -       |
| hsa-miR-637 | ATPAF1   | ATPAF1   | -       |
| hsa-miR-637 | ATPIF1   | ATPIF1   | -       |
| hsa-miR-637 | ATXN2L   | ATXN2L   | -       |
| hsa-miR-637 | ATXN7L3  | ATXN7L3  | -       |
| hsa-miR-637 | AVPR1B   | -        | AVPR1B  |
| hsa-miR-637 | AVPR2    | -        | AVPR2   |
| hsa-miR-637 | AWAT1    | AWAT1    | -       |
| hsa-miR-637 | BAAT     | BAAT     | -       |
| hsa-miR-637 | BAI1     | -        | BAI1    |

|             |           |           |          |
|-------------|-----------|-----------|----------|
| hsa-miR-637 | BAIAP2    | BAIAP2    | -        |
| hsa-miR-637 | BAZ2A     | BAZ2A     | -        |
| hsa-miR-637 | BCAP29    | BCAP29    | -        |
| hsa-miR-637 | BCAS3     | BCAS3     | -        |
| hsa-miR-637 | BCAT2     | -         | BCAT2    |
| hsa-miR-637 | BCDIN3D   | BCDIN3D   | -        |
| hsa-miR-637 | BCKDK     | BCKDK     | -        |
| hsa-miR-637 | BCL11A    | BCL11A    | -        |
| hsa-miR-637 | BCL2L13   | BCL2L13   | -        |
| hsa-miR-637 | BCL2L15   | BCL2L15   | -        |
| hsa-miR-637 | BCL9L     | BCL9L     | -        |
| hsa-miR-637 | BCO2      | BCO2      | -        |
| hsa-miR-637 | BEND3     | BEND3     | -        |
| hsa-miR-637 | BRCA1     | BRCA1     | -        |
| hsa-miR-637 | BSDC1     | BSDC1     | -        |
| hsa-miR-637 | BTBD11    | BTBD11    | -        |
| hsa-miR-637 | BTG2      | BTG2      | -        |
| hsa-miR-637 | C10orf62  | C10orf62  | -        |
| hsa-miR-637 | C10orf71  | -         | C10orf71 |
| hsa-miR-637 | C10orf81  | C10orf81  | -        |
| hsa-miR-637 | C11orf66  | C11orf66  | -        |
| hsa-miR-637 | C11orf68  | C11orf68  | -        |
| hsa-miR-637 | C11orf84  | C11orf84  | -        |
| hsa-miR-637 | C11orf9   | C11orf9   | -        |
| hsa-miR-637 | C12orf43  | C12orf43  | -        |
| hsa-miR-637 | C12orf51  | C12orf51  | -        |
| hsa-miR-637 | C12orf53  | C12orf53  | -        |
| hsa-miR-637 | C13orf38  | C13orf38  | -        |
| hsa-miR-637 | C14orf177 | C14orf177 | -        |
| hsa-miR-637 | C14orf79  | C14orf79  | -        |
| hsa-miR-637 | C15orf56  | C15orf56  | -        |
| hsa-miR-637 | C15orf57  | C15orf57  | -        |
| hsa-miR-637 | C16orf57  | C16orf57  | -        |
| hsa-miR-637 | C16orf58  | C16orf58  | -        |
| hsa-miR-637 | C16orf71  | -         | C16orf71 |
| hsa-miR-637 | C16orf74  | -         | C16orf74 |
| hsa-miR-637 | C17orf39  | C17orf39  | -        |
| hsa-miR-637 | C17orf57  | C17orf57  | -        |
| hsa-miR-637 | C17orf63  | C17orf63  | -        |
| hsa-miR-637 | C17orf70  | -         | C17orf70 |
| hsa-miR-637 | C17orf72  | C17orf72  | -        |
| hsa-miR-637 | C17orf76  | C17orf76  | -        |
| hsa-miR-637 | C18orf34  | C18orf34  | -        |
| hsa-miR-637 | C19orf12  | C19orf12  | -        |
| hsa-miR-637 | C19orf22  | C19orf22  | -        |
| hsa-miR-637 | C19orf29  | C19orf29  | -        |
| hsa-miR-637 | C19orf38  | C19orf38  | -        |
| hsa-miR-637 | C19orf48  | C19orf48  | -        |
| hsa-miR-637 | C19orf54  | C19orf54  | -        |
| hsa-miR-637 | C19orf63  | C19orf63  | -        |
| hsa-miR-637 | C19orf77  | C19orf77  | -        |

|             |           |           |          |
|-------------|-----------|-----------|----------|
| hsa-miR-637 | C1QTNF1   | C1QTNF1   | -        |
| hsa-miR-637 | C1QTNF7   | C1QTNF7   | -        |
| hsa-miR-637 | C1RL      | C1RL      | -        |
| hsa-miR-637 | C1orf106  | C1orf106  | -        |
| hsa-miR-637 | C1orf115  | C1orf115  | -        |
| hsa-miR-637 | C1orf116  | C1orf116  | -        |
| hsa-miR-637 | C1orf144  | C1orf144  | -        |
| hsa-miR-637 | C1orf159  | -         | C1orf159 |
| hsa-miR-637 | C1orf183  | C1orf183  | -        |
| hsa-miR-637 | C1orf190  | C1orf190  | -        |
| hsa-miR-637 | C1orf43   | C1orf43   | -        |
| hsa-miR-637 | C2        | -         | C2       |
| hsa-miR-637 | C20orf112 | C20orf112 | -        |
| hsa-miR-637 | C20orf72  | C20orf72  | -        |
| hsa-miR-637 | C21orf33  | C21orf33  | -        |
| hsa-miR-637 | C2orf53   | -         | C2orf53  |
| hsa-miR-637 | C2orf57   | C2orf57   | -        |
| hsa-miR-637 | C2orf68   | C2orf68   | -        |
| hsa-miR-637 | C2orf71   | C2orf71   | -        |
| hsa-miR-637 | C2orf72   | C2orf72   | -        |
| hsa-miR-637 | C3orf18   | C3orf18   | -        |
| hsa-miR-637 | C3orf23   | C3orf23   | -        |
| hsa-miR-637 | C3orf32   | -         | C3orf32  |
| hsa-miR-637 | C3orf36   | C3orf36   | -        |
| hsa-miR-637 | C4orf33   | C4orf33   | -        |
| hsa-miR-637 | C5orf22   | C5orf22   | -        |
| hsa-miR-637 | C6orf222  | C6orf222  | -        |
| hsa-miR-637 | C7orf41   | C7orf41   | -        |
| hsa-miR-637 | C9orf171  | C9orf171  | -        |
| hsa-miR-637 | C9orf37   | -         | C9orf37  |
| hsa-miR-637 | C9orf47   | C9orf47   | -        |
| hsa-miR-637 | CABLES1   | CABLES1   | -        |
| hsa-miR-637 | CABP7     | CABP7     | -        |
| hsa-miR-637 | CACNA1A   | CACNA1A   | -        |
| hsa-miR-637 | CACNA1D   | CACNA1D   | -        |
| hsa-miR-637 | CACNA1E   | CACNA1E   | -        |
| hsa-miR-637 | CACNA2D2  | CACNA2D2  | -        |
| hsa-miR-637 | CACNB1    | CACNB1    | -        |
| hsa-miR-637 | CADM3     | CADM3     | -        |
| hsa-miR-637 | CADM4     | -         | CADM4    |
| hsa-miR-637 | CAMK2B    | -         | CAMK2B   |
| hsa-miR-637 | CAMTA1    | CAMTA1    | -        |
| hsa-miR-637 | CAND2     | -         | CAND2    |
| hsa-miR-637 | CAPN11    | CAPN11    | -        |
| hsa-miR-637 | CAPNS1    | -         | CAPNS1   |
| hsa-miR-637 | CARD11    | -         | CARD11   |
| hsa-miR-637 | CASKIN1   | CASKIN1   | -        |
| hsa-miR-637 | CASZ1     | CASZ1     | -        |
| hsa-miR-637 | CATSPERG  | CATSPERG  | -        |
| hsa-miR-637 | CAV3      | CAV3      | -        |
| hsa-miR-637 | CBFA2T2   | CBFA2T2   | -        |

|             |          |         |          |
|-------------|----------|---------|----------|
| hsa-miR-637 | CBLN3    | CBLN3   | -        |
| hsa-miR-637 | CBR4     | CBR4    | -        |
| hsa-miR-637 | CBX6     | CBX6    | -        |
| hsa-miR-637 | CBX7     | CBX7    | -        |
| hsa-miR-637 | CBY1     | CBY1    | -        |
| hsa-miR-637 | CC2D2B   | CC2D2B  | -        |
| hsa-miR-637 | CCDC130  | -       | CCDC130  |
| hsa-miR-637 | CCDC155  | CCDC155 | -        |
| hsa-miR-637 | CCDC28B  | -       | CCDC28B  |
| hsa-miR-637 | CCDC85A  | CCDC85A | -        |
| hsa-miR-637 | CCDC88B  | CCDC88B | -        |
| hsa-miR-637 | CCDC88C  | CCDC88C | -        |
| hsa-miR-637 | CCL19    | CCL19   | -        |
| hsa-miR-637 | CCL8     | CCL8    | -        |
| hsa-miR-637 | CCNF     | CCNF    | -        |
| hsa-miR-637 | CCNJL    | CCNJL   | -        |
| hsa-miR-637 | CD160    | CD160   | -        |
| hsa-miR-637 | CD209    | CD209   | -        |
| hsa-miR-637 | CD22     | CD22    | -        |
| hsa-miR-637 | CD24     | CD24    | -        |
| hsa-miR-637 | CD2BP2   | CD2BP2  | -        |
| hsa-miR-637 | CD34     | CD34    | -        |
| hsa-miR-637 | CD3EAP   | CD3EAP  | -        |
| hsa-miR-637 | CD40LG   | CD40LG  | -        |
| hsa-miR-637 | CD44     | CD44    | -        |
| hsa-miR-637 | CD6      | CD6     | -        |
| hsa-miR-637 | CD7      | -       | CD7      |
| hsa-miR-637 | CD74     | CD74    | -        |
| hsa-miR-637 | CD79A    | CD79A   | -        |
| hsa-miR-637 | CD8B     | CD8B    | -        |
| hsa-miR-637 | CD99     | CD99    | -        |
| hsa-miR-637 | CDC34    | -       | CDC34    |
| hsa-miR-637 | CDC42EP1 | -       | CDC42EP1 |
| hsa-miR-637 | CDH16    | CDH16   | -        |
| hsa-miR-637 | CDH22    | CDH22   | -        |
| hsa-miR-637 | CDHR1    | CDHR1   | -        |
| hsa-miR-637 | CDHR3    | CDHR3   | -        |
| hsa-miR-637 | CDHR5    | CDHR5   | -        |
| hsa-miR-637 | CDK10    | CDK10   | -        |
| hsa-miR-637 | CDK16    | CDK16   | -        |
| hsa-miR-637 | CDK17    | CDK17   | -        |
| hsa-miR-637 | CDK18    | CDK18   | -        |
| hsa-miR-637 | CDK2     | CDK2    | -        |
| hsa-miR-637 | CDK2AP2  | CDK2AP2 | -        |
| hsa-miR-637 | CDKAL1   | CDKAL1  | -        |
| hsa-miR-637 | CDKN1A   | CDKN1A  | -        |
| hsa-miR-637 | CDR2L    | CDR2L   | -        |
| hsa-miR-637 | CDX2     | CDX2    | -        |
| hsa-miR-637 | CEACAM1  | CEACAM1 | -        |
| hsa-miR-637 | CEACAM21 | -       | CEACAM21 |
| hsa-miR-637 | CEACAM3  | -       | CEACAM3  |



|             |         |         |        |
|-------------|---------|---------|--------|
| hsa-miR-637 | CEBPA   | CEBPA   | -      |
| hsa-miR-637 | CELF1   | CELF1   | -      |
| hsa-miR-637 | CELF2   | CELF2   | -      |
| hsa-miR-637 | CELSR3  | CELSR3  | -      |
| hsa-miR-637 | CEP164  | CEP164  | -      |
| hsa-miR-637 | CEP63   | CEP63   | -      |
| hsa-miR-637 | CERCAM  | CERCAM  | -      |
| hsa-miR-637 | CFL1    | CFL1    | -      |
| hsa-miR-637 | CFLAR   | CFLAR   | -      |
| hsa-miR-637 | CHAC1   | CHAC1   | -      |
| hsa-miR-637 | CHMP1A  | -       | CHMP1A |
| hsa-miR-637 | CHMP6   | CHMP6   | -      |
| hsa-miR-637 | CHPF    | CHPF    | -      |
| hsa-miR-637 | CHRNA2  | CHRNA2  | -      |
| hsa-miR-637 | CHRN4   | CHRN4   | -      |
| hsa-miR-637 | CHST1   | CHST1   | -      |
| hsa-miR-637 | CIC     | CIC     | -      |
| hsa-miR-637 | CIITA   | CIITA   | -      |
| hsa-miR-637 | CISH    | CISH    | -      |
| hsa-miR-637 | CLCF1   | CLCF1   | -      |
| hsa-miR-637 | CLCN7   | CLCN7   | -      |
| hsa-miR-637 | CLDN1   | CLDN1   | -      |
| hsa-miR-637 | CLDN2   | CLDN2   | -      |
| hsa-miR-637 | CLDN3   | CLDN3   | -      |
| hsa-miR-637 | CLEC11A | CLEC11A | -      |
| hsa-miR-637 | CLEC16A | CLEC16A | -      |
| hsa-miR-637 | CLEC4D  | CLEC4D  | -      |
| hsa-miR-637 | CLEC4M  | CLEC4M  | -      |
| hsa-miR-637 | CLIP3   | CLIP3   | -      |
| hsa-miR-637 | CLPP    | -       | CLPP   |
| hsa-miR-637 | CLSTN2  | CLSTN2  | -      |
| hsa-miR-637 | CLVS1   | CLVS1   | -      |
| hsa-miR-637 | CMIP    | CMIP    | -      |
| hsa-miR-637 | CNDP2   | CNDP2   | -      |
| hsa-miR-637 | CNGB1   | CNGB1   | -      |
| hsa-miR-637 | CNIH2   | CNIH2   | -      |
| hsa-miR-637 | CNN2    | CNN2    | -      |
| hsa-miR-637 | CNNM1   | CNNM1   | -      |
| hsa-miR-637 | CNOT4   | CNOT4   | -      |
| hsa-miR-637 | CNPY2   | CNPY2   | -      |
| hsa-miR-637 | CNPY4   | CNPY4   | -      |
| hsa-miR-637 | CNTNAP1 | CNTNAP1 | -      |
| hsa-miR-637 | COL1A1  | COL1A1  | -      |
| hsa-miR-637 | COL2A1  | COL2A1  | -      |
| hsa-miR-637 | COL4A1  | COL4A1  | -      |
| hsa-miR-637 | COL9A2  | COL9A2  | -      |
| hsa-miR-637 | COPA    | COPA    | -      |
| hsa-miR-637 | COPS7A  | -       | COPS7A |
| hsa-miR-637 | COPS7B  | COPS7B  | -      |
| hsa-miR-637 | CORO2A  | CORO2A  | -      |
| hsa-miR-637 | CORO6   | CORO6   | -      |

|             |         |         |        |
|-------------|---------|---------|--------|
| hsa-miR-637 | COX10   | COX10   | -      |
| hsa-miR-637 | CPEB4   | CPEB4   | -      |
| hsa-miR-637 | CPLX2   | CPLX2   | -      |
| hsa-miR-637 | CPNE3   | CPNE3   | -      |
| hsa-miR-637 | CPS1    | CPS1    | -      |
| hsa-miR-637 | CPSF7   | CPSF7   | -      |
| hsa-miR-637 | CPT1B   | CPT1B   | -      |
| hsa-miR-637 | CRABP1  | CRABP1  | -      |
| hsa-miR-637 | CRCT1   | -       | CRCT1  |
| hsa-miR-637 | CREBL2  | CREBL2  | -      |
| hsa-miR-637 | CREBZF  | CREBZF  | -      |
| hsa-miR-637 | CRELD1  | CRELD1  | -      |
| hsa-miR-637 | CRHR1   | CRHR1   | -      |
| hsa-miR-637 | CRISP2  | CRISP2  | -      |
| hsa-miR-637 | CRLS1   | CRLS1   | -      |
| hsa-miR-637 | CRP     | CRP     | -      |
| hsa-miR-637 | CRYZ    | CRYZ    | -      |
| hsa-miR-637 | CSAG1   | CSAG1   | -      |
| hsa-miR-637 | CSAG2   | CSAG2   | -      |
| hsa-miR-637 | CSAG3   | CSAG3   | -      |
| hsa-miR-637 | -       | CSMD2   | CSMD2  |
| hsa-miR-637 | CSNK1G3 | CSNK1G3 | -      |
| hsa-miR-637 | CTAGE1  | CTAGE1  | -      |
| hsa-miR-637 | CTSB    | CTSB    | -      |
| hsa-miR-637 | CTSS    | CTSS    | -      |
| hsa-miR-637 | CUEDC1  | -       | CUEDC1 |
| hsa-miR-637 | CUX1    | CUX1    | -      |
| hsa-miR-637 | CX3CR1  | CX3CR1  | -      |
| hsa-miR-637 | CXCL14  | CXCL14  | -      |
| hsa-miR-637 | CYB561  | CYB561  | -      |
| hsa-miR-637 | CYB5B   | CYB5B   | -      |
| hsa-miR-637 | CYB5R3  | CYB5R3  | -      |
| hsa-miR-637 | CYP2U1  | CYP2U1  | -      |
| hsa-miR-637 | CYP2W1  | -       | CYP2W1 |
| hsa-miR-637 | CYP3A4  | CYP3A4  | -      |
| hsa-miR-637 | CYP3A7  | CYP3A7  | -      |
| hsa-miR-637 | CYP4A11 | CYP4A11 | -      |
| hsa-miR-637 | CYP8B1  | CYP8B1  | -      |
| hsa-miR-637 | CYTH2   | CYTH2   | -      |
| hsa-miR-637 | CYTH4   | CYTH4   | -      |
| hsa-miR-637 | DAB2IP  | -       | DAB2IP |
| hsa-miR-637 | DAGLA   | DAGLA   | -      |
| hsa-miR-637 | DAK     | DAK     | -      |
| hsa-miR-637 | DBNL    | DBNL    | -      |
| hsa-miR-637 | DCAF17  | DCAF17  | -      |
| hsa-miR-637 | DCAF8   | DCAF8   | -      |
| hsa-miR-637 | DCAKD   | -       | DCAKD  |
| hsa-miR-637 | DCLK2   | DCLK2   | -      |
| hsa-miR-637 | DCLK3   | DCLK3   | -      |
| hsa-miR-637 | DCUN1D3 | DCUN1D3 | -      |
| hsa-miR-637 | DDB1    | DDB1    | -      |

|             |         |         |         |
|-------------|---------|---------|---------|
| hsa-miR-637 | DDR1    | DDR1    | -       |
| hsa-miR-637 | DDTL    | DDTL    | -       |
| hsa-miR-637 | DDX23   | DDX23   | -       |
| hsa-miR-637 | DDX49   | DDX49   | -       |
| hsa-miR-637 | DEDD2   | DEDD2   | -       |
| hsa-miR-637 | DEF6    | -       | DEF6    |
| hsa-miR-637 | DES     | -       | DES     |
| hsa-miR-637 | DFNB31  | DFNB31  | -       |
| hsa-miR-637 | DGKD    | DGKD    | -       |
| hsa-miR-637 | DHH     | DHH     | -       |
| hsa-miR-637 | DHRS3   | -       | DHRS3   |
| hsa-miR-637 | DHX33   | DHX33   | -       |
| hsa-miR-637 | DHX37   | -       | DHX37   |
| hsa-miR-637 | DISC1   | DISC1   | -       |
| hsa-miR-637 | DKK3    | DKK3    | -       |
| hsa-miR-637 | DLX2    | DLX2    | -       |
| hsa-miR-637 | DMKN    | -       | DMKN    |
| hsa-miR-637 | DMWD    | DMWD    | -       |
| hsa-miR-637 | DNAJB6  | DNAJB6  | -       |
| hsa-miR-637 | DNAJC15 | DNAJC15 | -       |
| hsa-miR-637 | DNALI1  | DNALI1  | -       |
| hsa-miR-637 | DNM1    | DNM1    | -       |
| hsa-miR-637 | DNMT3B  | DNMT3B  | -       |
| hsa-miR-637 | DOT1L   | DOT1L   | -       |
| hsa-miR-637 | DPH2    | DPH2    | -       |
| hsa-miR-637 | DPP4    | DPP4    | -       |
| hsa-miR-637 | DPY19L1 | DPY19L1 | -       |
| hsa-miR-637 | DSC3    | DSC3    | -       |
| hsa-miR-637 | DSCAML1 | DSCAML1 | -       |
| hsa-miR-637 | DSE     | DSE     | -       |
| hsa-miR-637 | DSEL    | DSEL    | -       |
| hsa-miR-637 | DTNB    | DTNB    | -       |
| hsa-miR-637 | DTWD2   | DTWD2   | -       |
| hsa-miR-637 | DUS1L   | DUS1L   | -       |
| hsa-miR-637 | DUSP9   | DUSP9   | -       |
| hsa-miR-637 | DVL1    | -       | DVL1    |
| hsa-miR-637 | DVL3    | DVL3    | -       |
| hsa-miR-637 | DYNLRB1 | DYNLRB1 | -       |
| hsa-miR-637 | DYRK1B  | DYRK1B  | -       |
| hsa-miR-637 | DZIP1L  | -       | DZIP1L  |
| hsa-miR-637 | E2F2    | E2F2    | -       |
| hsa-miR-637 | EBF4    | EBF4    | -       |
| hsa-miR-637 | EFCAB4A | -       | EFCAB4A |
| hsa-miR-637 | EFHD1   | EFHD1   | -       |
| hsa-miR-637 | EFNA3   | EFNA3   | -       |
| hsa-miR-637 | EFNA4   | EFNA4   | -       |
| hsa-miR-637 | EFR3B   | EFR3B   | -       |
| hsa-miR-637 | EFTUD2  | EFTUD2  | -       |
| hsa-miR-637 | EGFR    | EGFR    | -       |
| hsa-miR-637 | EGR3    | EGR3    | -       |
| hsa-miR-637 | EHD2    | EHD2    | -       |

|             |          |          |         |
|-------------|----------|----------|---------|
| hsa-miR-637 | EHF      | EHF      | -       |
| hsa-miR-637 | EHMT1    | EHMT1    | -       |
| hsa-miR-637 | EIF2S2   | EIF2S2   | -       |
| hsa-miR-637 | EIF4B    | EIF4B    | -       |
| hsa-miR-637 | EIF5AL1  | EIF5AL1  | -       |
| hsa-miR-637 | ELF4     | ELF4     | -       |
| hsa-miR-637 | ELK1     | ELK1     | -       |
| hsa-miR-637 | ELMO1    | ELMO1    | -       |
| hsa-miR-637 | EMID1    | -        | EMID1   |
| hsa-miR-637 | EMID2    | EMID2    | -       |
| hsa-miR-637 | ENC1     | ENC1     | -       |
| hsa-miR-637 | ENPP1    | ENPP1    | -       |
| hsa-miR-637 | EPB41L4A | EPB41L4A | -       |
| hsa-miR-637 | EPB41L4B | EPB41L4B | -       |
| hsa-miR-637 | EPB49    | EPB49    | -       |
| hsa-miR-637 | EPHA10   | EPHA10   | -       |
| hsa-miR-637 | EPHA7    | EPHA7    | -       |
| hsa-miR-637 | EPHA8    | EPHA8    | -       |
| hsa-miR-637 | EPHB2    | EPHB2    | -       |
| hsa-miR-637 | EPHB3    | EPHB3    | -       |
| hsa-miR-637 | EPHB4    | EPHB4    | -       |
| hsa-miR-637 | ERBB3    | ERBB3    | -       |
| hsa-miR-637 | ERCC2    | ERCC2    | -       |
| hsa-miR-637 | ERG      | ERG      | -       |
| hsa-miR-637 | ERGIC3   | ERGIC3   | -       |
| hsa-miR-637 | ERI3     | ERI3     | -       |
| hsa-miR-637 | ERLIN1   | ERLIN1   | -       |
| hsa-miR-637 | ERMAP    | ERMAP    | -       |
| hsa-miR-637 | ERN1     | ERN1     | -       |
| hsa-miR-637 | ESRRB    | ESRRB    | -       |
| hsa-miR-637 | ESYT2    | ESYT2    | -       |
| hsa-miR-637 | ETV5     | ETV5     | -       |
| hsa-miR-637 | EXD2     | EXD2     | -       |
| hsa-miR-637 | EXOC7    | EXOC7    | -       |
| hsa-miR-637 | EXOC8    | EXOC8    | -       |
| hsa-miR-637 | F12      | F12      | -       |
| hsa-miR-637 | FAF2     | FAF2     | -       |
| hsa-miR-637 | FAM102A  | FAM102A  | -       |
| hsa-miR-637 | FAM105B  | -        | FAM105B |
| hsa-miR-637 | FAM115A  | FAM115A  | -       |
| hsa-miR-637 | FAM120C  | FAM120C  | -       |
| hsa-miR-637 | FAM127A  | FAM127A  | -       |
| hsa-miR-637 | FAM131B  | FAM131B  | -       |
| hsa-miR-637 | FAM153A  | FAM153A  | -       |
| hsa-miR-637 | FAM153C  | FAM153C  | -       |
| hsa-miR-637 | FAM163A  | FAM163A  | -       |
| hsa-miR-637 | FAM189B  | FAM189B  | -       |
| hsa-miR-637 | FAM18B2  | -        | FAM18B2 |
| hsa-miR-637 | FAM195B  | FAM195B  | -       |
| hsa-miR-637 | FAM199X  | FAM199X  | -       |
| hsa-miR-637 | FAM22A   | FAM22A   | -       |

|             |         |         |         |
|-------------|---------|---------|---------|
| hsa-miR-637 | FAM32A  | FAM32A  | -       |
| hsa-miR-637 | FAM46B  | FAM46B  | -       |
| hsa-miR-637 | FAM53C  | FAM53C  | -       |
| hsa-miR-637 | FAM89B  | FAM89B  | -       |
| hsa-miR-637 | FARP1   | FARP1   | -       |
| hsa-miR-637 | FBLIM1  | FBLIM1  | -       |
| hsa-miR-637 | FBLN5   | FBLN5   | -       |
| hsa-miR-637 | FBRS    | FBRS    | -       |
| hsa-miR-637 | FBXL12  | -       | FBXL12  |
| hsa-miR-637 | FBXL19  | FBXL19  | -       |
| hsa-miR-637 | FBXO17  | FBXO17  | -       |
| hsa-miR-637 | FBXO5   | FBXO5   | -       |
| hsa-miR-637 | FCHSD1  | FCHSD1  | -       |
| hsa-miR-637 | FCRL6   | FCRL6   | -       |
| hsa-miR-637 | FCRLA   | FCRLA   | -       |
| hsa-miR-637 | FDXR    | -       | FDXR    |
| hsa-miR-637 | FEN1    | FEN1    | -       |
| hsa-miR-637 | FERMT1  | FERMT1  | -       |
| hsa-miR-637 | FERMT3  | FERMT3  | -       |
| hsa-miR-637 | FEZ1    | FEZ1    | -       |
| hsa-miR-637 | FGD5    | FGD5    | -       |
| hsa-miR-637 | FGF1    | FGF1    | -       |
| hsa-miR-637 | FHDC1   | FHDC1   | -       |
| hsa-miR-637 | FIGNL2  | FIGNL2  | -       |
| hsa-miR-637 | FLRT2   | FLRT2   | -       |
| hsa-miR-637 | FLT1    | FLT1    | -       |
| hsa-miR-637 | FLT4    | -       | FLT4    |
| hsa-miR-637 | FNBP1   | FNBP1   | -       |
| hsa-miR-637 | FNDC7   | FNDC7   | -       |
| hsa-miR-637 | FOSL2   | FOSL2   | -       |
| hsa-miR-637 | FOXA1   | FOXA1   | -       |
| hsa-miR-637 | FOXJ2   | FOXJ2   | -       |
| hsa-miR-637 | FOXM1   | FOXM1   | -       |
| hsa-miR-637 | FOXN1   | FOXN1   | -       |
| hsa-miR-637 | FOXO4   | FOXO4   | -       |
| hsa-miR-637 | FRAT1   | FRAT1   | -       |
| hsa-miR-637 | FSD1    | -       | FSD1    |
| hsa-miR-637 | FTSJD2  | FTSJD2  | -       |
| hsa-miR-637 | FURIN   | FURIN   | -       |
| hsa-miR-637 | FUT10   | FUT10   | -       |
| hsa-miR-637 | FUT11   | FUT11   | -       |
| hsa-miR-637 | FUT2    | FUT2    | -       |
| hsa-miR-637 | FXR2    | FXR2    | -       |
| hsa-miR-637 | FXYD2   | FXYD2   | -       |
| hsa-miR-637 | FZD2    | -       | FZD2    |
| hsa-miR-637 | GABRQ   | GABRQ   | -       |
| hsa-miR-637 | GADL1   | GADL1   | -       |
| hsa-miR-637 | GAL3ST1 | -       | GAL3ST1 |
| hsa-miR-637 | GAL3ST4 | GAL3ST4 | -       |
| hsa-miR-637 | GALK1   | GALK1   | -       |
| hsa-miR-637 | GALNT10 | GALNT10 | -       |

|             |          |          |        |
|-------------|----------|----------|--------|
| hsa-miR-637 | GALNT6   | GALNT6   | -      |
| hsa-miR-637 | GANAB    | GANAB    | -      |
| hsa-miR-637 | GANC     | GANC     | -      |
| hsa-miR-637 | GATA5    | GATA5    | -      |
| hsa-miR-637 | GATAD2A  | GATAD2A  | -      |
| hsa-miR-637 | GATS     | GATS     | -      |
| hsa-miR-637 | GBGT1    | GBGT1    | -      |
| hsa-miR-637 | GCET2    | GCET2    | -      |
| hsa-miR-637 | GCGR     | GCGR     | -      |
| hsa-miR-637 | GCK      | GCK      | -      |
| hsa-miR-637 | GCOM1    | GCOM1    | -      |
| hsa-miR-637 | GDE1     | GDE1     | -      |
| hsa-miR-637 | GDF6     | GDF6     | -      |
| hsa-miR-637 | GDI1     | GDI1     | -      |
| hsa-miR-637 | GFAP     | GFAP     | -      |
| hsa-miR-637 | GGA1     | GGA1     | -      |
| hsa-miR-637 | GGA3     | GGA3     | -      |
| hsa-miR-637 | GGT7     | GGT7     | -      |
| hsa-miR-637 | GIGYF1   | GIGYF1   | -      |
| hsa-miR-637 | GIGYF2   | GIGYF2   | -      |
| hsa-miR-637 | GIPC3    | GIPC3    | -      |
| hsa-miR-637 | GIT2     | GIT2     | -      |
| hsa-miR-637 | GJA5     | GJA5     | -      |
| hsa-miR-637 | GJB3     | GJB3     | -      |
| hsa-miR-637 | GJB4     | GJB4     | -      |
| hsa-miR-637 | GJB7     | GJB7     | -      |
| hsa-miR-637 | GLDN     | GLDN     | -      |
| hsa-miR-637 | GLI2     | GLI2     | -      |
| hsa-miR-637 | GLIPR2   | GLIPR2   | -      |
| hsa-miR-637 | GLIS3    | GLIS3    | -      |
| hsa-miR-637 | GLP1R    | GLP1R    | -      |
| hsa-miR-637 | GLT25D2  | GLT25D2  | -      |
| hsa-miR-637 | GLYR1    | GLYR1    | -      |
| hsa-miR-637 | GNAI2    | GNAI2    | -      |
| hsa-miR-637 | GNB3     | GNB3     | -      |
| hsa-miR-637 | GNPDA1   | GNPDA1   | -      |
| hsa-miR-637 | GOLGA6L1 | GOLGA6L1 | -      |
| hsa-miR-637 | GOLGA6L6 | GOLGA6L6 | -      |
| hsa-miR-637 | GPATCH8  | GPATCH8  | -      |
| hsa-miR-637 | GPKOW    | GPKOW    | -      |
| hsa-miR-637 | GPN1     | GPN1     | -      |
| hsa-miR-637 | GPR108   | GPR108   | -      |
| hsa-miR-637 | GPR12    | GPR12    | -      |
| hsa-miR-637 | GPR133   | -        | GPR133 |
| hsa-miR-637 | GPR3     | GPR3     | -      |
| hsa-miR-637 | GPR35    | GPR35    | -      |
| hsa-miR-637 | GPR68    | GPR68    | -      |
| hsa-miR-637 | GPR78    | GPR78    | -      |
| hsa-miR-637 | GPSM1    | -        | GPSM1  |
| hsa-miR-637 | GPX5     | GPX5     | -      |
| hsa-miR-637 | GREM1    | GREM1    | -      |

|             |         |         |        |
|-------------|---------|---------|--------|
| hsa-miR-637 | GRIA1   | GRIA1   | -      |
| hsa-miR-637 | GRIA4   | GRIA4   | -      |
| hsa-miR-637 | GRIK5   | GRIK5   | -      |
| hsa-miR-637 | GRIN2A  | GRIN2A  | -      |
| hsa-miR-637 | GRIN2D  | -       | GRIN2D |
| hsa-miR-637 | GRINL1A | GRINL1A | -      |
| hsa-miR-637 | GRM3    | GRM3    | -      |
| hsa-miR-637 | GRM4    | GRM4    | -      |
| hsa-miR-637 | GSK3A   | GSK3A   | -      |
| hsa-miR-637 | GSPT1   | GSPT1   | -      |
| hsa-miR-637 | GSS     | GSS     | -      |
| hsa-miR-637 | GTF2F1  | GTF2F1  | -      |
| hsa-miR-637 | GTPBP3  | GTPBP3  | -      |
| hsa-miR-637 | GUCA1B  | GUCA1B  | -      |
| hsa-miR-637 | GUCA2A  | GUCA2A  | -      |
| hsa-miR-637 | HAND1   | HAND1   | -      |
| hsa-miR-637 | HAP1    | HAP1    | -      |
| hsa-miR-637 | HAS3    | HAS3    | -      |
| hsa-miR-637 | HAUS2   | HAUS2   | -      |
| hsa-miR-637 | HAUS6   | HAUS6   | -      |
| hsa-miR-637 | HBZ     | -       | HBZ    |
| hsa-miR-637 | HCCS    | HCCS    | -      |
| hsa-miR-637 | HCFC2   | HCFC2   | -      |
| hsa-miR-637 | HCP5    | HCP5    | -      |
| hsa-miR-637 | HDAC11  | HDAC11  | -      |
| hsa-miR-637 | HDAC5   | HDAC5   | -      |
| hsa-miR-637 | HDAC6   | HDAC6   | -      |
| hsa-miR-637 | HDAC8   | HDAC8   | -      |
| hsa-miR-637 | HEPN1   | HEPN1   | -      |
| hsa-miR-637 | HERC6   | HERC6   | -      |
| hsa-miR-637 | HEXIM1  | HEXIM1  | -      |
| hsa-miR-637 | HEYL    | HEYL    | -      |
| hsa-miR-637 | HGS     | -       | HGS    |
| hsa-miR-637 | HIF3A   | HIF3A   | -      |
| hsa-miR-637 | HIGD1A  | HIGD1A  | -      |
| hsa-miR-637 | HK2     | HK2     | -      |
| hsa-miR-637 | HMG20B  | HMG20B  | -      |
| hsa-miR-637 | HMGA1   | HMGA1   | -      |
| hsa-miR-637 | HMHA1   | HMHA1   | -      |
| hsa-miR-637 | HMX2    | -       | HMX2   |
| hsa-miR-637 | HN1L    | HN1L    | -      |
| hsa-miR-637 | HNF4A   | HNF4A   | -      |
| hsa-miR-637 | HNRNPAB | HNRNPAB | -      |
| hsa-miR-637 | HNRNPD  | HNRNPD  | -      |
| hsa-miR-637 | HOMER2  | HOMER2  | -      |
| hsa-miR-637 | HOOK3   | HOOK3   | -      |
| hsa-miR-637 | HOXA11  | HOXA11  | -      |
| hsa-miR-637 | HOXB5   | HOXB5   | -      |
| hsa-miR-637 | HOXB7   | HOXB7   | -      |
| hsa-miR-637 | HOXB8   | HOXB8   | -      |
| hsa-miR-637 | HOXC6   | HOXC6   | -      |

|             |         |        |         |
|-------------|---------|--------|---------|
| hsa-miR-637 | HOXD9   | HOXD9  | -       |
| hsa-miR-637 | HS1BP3  | HS1BP3 | -       |
| hsa-miR-637 | HSBP1   | HSBP1  | -       |
| hsa-miR-637 | HSD11B1 | -      | HSD11B1 |
| hsa-miR-637 | HSF1    | -      | HSF1    |
| hsa-miR-637 | HSF2BP  | HSF2BP | -       |
| hsa-miR-637 | HSPG2   | HSPG2  | -       |
| hsa-miR-637 | HTR3A   | HTR3A  | -       |
| hsa-miR-637 | HYAL2   | -      | HYAL2   |
| hsa-miR-637 | ICA1    | ICA1   | -       |
| hsa-miR-637 | ID1     | ID1    | -       |
| hsa-miR-637 | IDH3A   | IDH3A  | -       |
| hsa-miR-637 | IDO2    | IDO2   | -       |
| hsa-miR-637 | IFITM2  | IFITM2 | -       |
| hsa-miR-637 | IFRD1   | IFRD1  | -       |
| hsa-miR-637 | IFRD2   | IFRD2  | -       |
| hsa-miR-637 | IGFALS  | -      | IGFALS  |
| hsa-miR-637 | IGFL4   | IGFL4  | -       |
| hsa-miR-637 | IL17C   | -      | IL17C   |
| hsa-miR-637 | IL28RA  | IL28RA | -       |
| hsa-miR-637 | IL4R    | IL4R   | -       |
| hsa-miR-637 | IL6R    | IL6R   | -       |
| hsa-miR-637 | IMPA2   | IMPA2  | -       |
| hsa-miR-637 | ING4    | ING4   | -       |
| hsa-miR-637 | INHBE   | INHBE  | -       |
| hsa-miR-637 | INO80E  | INO80E | -       |
| hsa-miR-637 | INTS3   | INTS3  | -       |
| hsa-miR-637 | IP6K1   | IP6K1  | -       |
| hsa-miR-637 | IP6K3   | IP6K3  | -       |
| hsa-miR-637 | IPPK    | IPPK   | -       |
| hsa-miR-637 | IQSEC2  | IQSEC2 | -       |
| hsa-miR-637 | IRAK2   | IRAK2  | -       |
| hsa-miR-637 | IRAK4   | IRAK4  | -       |
| hsa-miR-637 | IRF5    | IRF5   | -       |
| hsa-miR-637 | ISM2    | ISM2   | -       |
| hsa-miR-637 | ISY1    | ISY1   | -       |
| hsa-miR-637 | ITFG3   | ITFG3  | -       |
| hsa-miR-637 | ITGA10  | ITGA10 | -       |
| hsa-miR-637 | ITGA3   | ITGA3  | -       |
| hsa-miR-637 | ITGA5   | ITGA5  | -       |
| hsa-miR-637 | ITGAL   | ITGAL  | -       |
| hsa-miR-637 | ITGAM   | -      | ITGAM   |
| hsa-miR-637 | ITGAX   | ITGAX  | -       |
| hsa-miR-637 | ITIH4   | ITIH4  | -       |
| hsa-miR-637 | ITIH5   | ITIH5  | -       |
| hsa-miR-637 | ITM2C   | ITM2C  | -       |
| hsa-miR-637 | ITPKB   | ITPKB  | -       |
| hsa-miR-637 | ITSN2   | ITSN2  | -       |
| hsa-miR-637 | JMJD5   | JMJD5  | -       |
| hsa-miR-637 | JRK     | JRK    | -       |
| hsa-miR-637 | JUN     | JUN    | -       |



|             |           |           |        |
|-------------|-----------|-----------|--------|
| hsa-miR-637 | JUP       | JUP       | -      |
| hsa-miR-637 | KALRN     | KALRN     | -      |
| hsa-miR-637 | KAT2A     | KAT2A     | -      |
| hsa-miR-637 | KCNA6     | KCNA6     | -      |
| hsa-miR-637 | KCNC3     | KCNC3     | -      |
| hsa-miR-637 | KCND1     | KCND1     | -      |
| hsa-miR-637 | KCNH2     | KCNH2     | -      |
| hsa-miR-637 | KCNIP1    | KCNIP1    | -      |
| hsa-miR-637 | KCNIP2    | KCNIP2    | -      |
| hsa-miR-637 | KCNJ10    | KCNJ10    | -      |
| hsa-miR-637 | KCNJ9     | KCNJ9     | -      |
| hsa-miR-637 | KCNMA1    | -         | KCNMA1 |
| hsa-miR-637 | KCNQ1     | -         | KCNQ1  |
| hsa-miR-637 | KCNT1     | KCNT1     | -      |
| hsa-miR-637 | KCTD15    | KCTD15    | -      |
| hsa-miR-637 | KCTD17    | KCTD17    | -      |
| hsa-miR-637 | KDEL1     | KDEL1     | -      |
| hsa-miR-637 | KDM4B     | KDM4B     | -      |
| hsa-miR-637 | KDM5C     | KDM5C     | -      |
| hsa-miR-637 | KHDRBS1   | KHDRBS1   | -      |
| hsa-miR-637 | KHSRP     | KHSRP     | -      |
| hsa-miR-637 | KIAA0319L | KIAA0319L | -      |
| hsa-miR-637 | KIAA0494  | KIAA0494  | -      |
| hsa-miR-637 | KIAA0528  | KIAA0528  | -      |
| hsa-miR-637 | KIAA0556  | KIAA0556  | -      |
| hsa-miR-637 | KIAA1161  | KIAA1161  | -      |
| hsa-miR-637 | KIAA1210  | KIAA1210  | -      |
| hsa-miR-637 | KIAA1274  | KIAA1274  | -      |
| hsa-miR-637 | KIAA1324  | KIAA1324  | -      |
| hsa-miR-637 | KIAA1370  | KIAA1370  | -      |
| hsa-miR-637 | KIAA1462  | KIAA1462  | -      |
| hsa-miR-637 | KIAA1468  | KIAA1468  | -      |
| hsa-miR-637 | KIF17     | KIF17     | -      |
| hsa-miR-637 | KIF3C     | KIF3C     | -      |
| hsa-miR-637 | KIF4A     | KIF4A     | -      |
| hsa-miR-637 | KLHDC7A   | KLHDC7A   | -      |
| hsa-miR-637 | KLK1      | KLK1      | -      |
| hsa-miR-637 | KLK4      | -         | KLK4   |
| hsa-miR-637 | KMO       | KMO       | -      |
| hsa-miR-637 | KNDC1     | -         | KNDC1  |
| hsa-miR-637 | KRBA1     | KRBA1     | -      |
| hsa-miR-637 | KRI1      | KRI1      | -      |
| hsa-miR-637 | KRT1      | KRT1      | -      |
| hsa-miR-637 | KRT3      | KRT3      | -      |
| hsa-miR-637 | KRT71     | KRT71     | -      |
| hsa-miR-637 | KRT84     | -         | KRT84  |
| hsa-miR-637 | KRT85     | KRT85     | -      |
| hsa-miR-637 | KRTAP10-5 | KRTAP10-5 | -      |
| hsa-miR-637 | KRTAP12-3 | KRTAP12-3 | -      |
| hsa-miR-637 | L1TD1     | L1TD1     | -      |
| hsa-miR-637 | LANCL1    | LANCL1    | -      |

|             |              |              |        |
|-------------|--------------|--------------|--------|
| hsa-miR-637 | LARP1B       | LARP1B       | -      |
| hsa-miR-637 | LARP4B       | LARP4B       | -      |
| hsa-miR-637 | LARS         | LARS         | -      |
| hsa-miR-637 | LARS2        | LARS2        | -      |
| hsa-miR-637 | LASP1        | LASP1        | -      |
| hsa-miR-637 | LCE2D        | LCE2D        | -      |
| hsa-miR-637 | LDB3         | LDB3         | -      |
| hsa-miR-637 | LDLRAD2      | LDLRAD2      | -      |
| hsa-miR-637 | LDLRAD3      | LDLRAD3      | -      |
| hsa-miR-637 | LDLRAP1      | LDLRAP1      | -      |
| hsa-miR-637 | LENEP        | LENEP        | -      |
| hsa-miR-637 | LETM1        | LETM1        | -      |
| hsa-miR-637 | LGALS8       | LGALS8       | -      |
| hsa-miR-637 | LHFPL2       | LHFPL2       | -      |
| hsa-miR-637 | LILRB2       | -            | LILRB2 |
| hsa-miR-637 | LILRB3       | -            | LILRB3 |
| hsa-miR-637 | LIN37        | LIN37        | -      |
| hsa-miR-637 | LITAF        | LITAF        | -      |
| hsa-miR-637 | LMNA         | LMNA         | -      |
| hsa-miR-637 | LMO3         | LMO3         | -      |
| hsa-miR-637 | LMTK3        | LMTK3        | -      |
| hsa-miR-637 | LMX1B        | -            | LMX1B  |
| hsa-miR-637 | LOC100329135 | LOC100329135 | -      |
| hsa-miR-637 | LOC147646    | LOC147646    | -      |
| hsa-miR-637 | LOC375190    | LOC375190    | -      |
| hsa-miR-637 | LOC647589    | LOC647589    | -      |
| hsa-miR-637 | LOR          | LOR          | -      |
| hsa-miR-637 | LOXHD1       | LOXHD1       | -      |
| hsa-miR-637 | LOXL2        | LOXL2        | -      |
| hsa-miR-637 | LPIN1        | LPIN1        | -      |
| hsa-miR-637 | LPIN2        | LPIN2        | -      |
| hsa-miR-637 | LPP          | LPP          | -      |
| hsa-miR-637 | LPPR1        | LPPR1        | -      |
| hsa-miR-637 | -            | LRDD         | LRDD   |
| hsa-miR-637 | LRFN1        | LRFN1        | -      |
| hsa-miR-637 | LRP1         | LRP1         | -      |
| hsa-miR-637 | LRP4         | LRP4         | -      |
| hsa-miR-637 | LRRC15       | LRRC15       | -      |
| hsa-miR-637 | LRRC16B      | LRRC16B      | -      |
| hsa-miR-637 | LRRC20       | LRRC20       | -      |
| hsa-miR-637 | LRRC38       | LRRC38       | -      |
| hsa-miR-637 | LRRC42       | LRRC42       | -      |
| hsa-miR-637 | LRRC61       | -            | LRRC61 |
| hsa-miR-637 | LRRC68       | LRRC68       | -      |
| hsa-miR-637 | LRRC8B       | LRRC8B       | -      |
| hsa-miR-637 | LRRC8E       | LRRC8E       | -      |
| hsa-miR-637 | LRRFIP1      | LRRFIP1      | -      |
| hsa-miR-637 | LRTOMT       | LRTOMT       | -      |
| hsa-miR-637 | LST1         | LST1         | -      |
| hsa-miR-637 | LY6D         | -            | LY6D   |
| hsa-miR-637 | LY6E         | LY6E         | -      |

|             |          |          |        |
|-------------|----------|----------|--------|
| hsa-miR-637 | LY6G5C   | LY6G5C   | -      |
| hsa-miR-637 | LY86     | -        | LY86   |
| hsa-miR-637 | LYNX1    | -        | LYNX1  |
| hsa-miR-637 | LYPLA2   | LYPLA2   | -      |
| hsa-miR-637 | LZTR1    | LZTR1    | -      |
| hsa-miR-637 | MAD2L2   | MAD2L2   | -      |
| hsa-miR-637 | MAFG     | MAFG     | -      |
| hsa-miR-637 | MAML3    | MAML3    | -      |
| hsa-miR-637 | MAN1C1   | MAN1C1   | -      |
| hsa-miR-637 | MAN2B2   | MAN2B2   | -      |
| hsa-miR-637 | MAOA     | MAOA     | -      |
| hsa-miR-637 | MAP1A    | MAP1A    | -      |
| hsa-miR-637 | MAP2K7   | MAP2K7   | -      |
| hsa-miR-637 | MAP3K11  | MAP3K11  | -      |
| hsa-miR-637 | MAP3K13  | MAP3K13  | -      |
| hsa-miR-637 | MAPK7    | MAPK7    | -      |
| hsa-miR-637 | MAPK8IP3 | MAPK8IP3 | -      |
| hsa-miR-637 | MAPRE3   | -        | MAPRE3 |
| hsa-miR-637 | MARCKSL1 | MARCKSL1 | -      |
| hsa-miR-637 | MARVELD1 | MARVELD1 | -      |
| hsa-miR-637 | MBD3     | MBD3     | -      |
| hsa-miR-637 | MBP      | MBP      | -      |
| hsa-miR-637 | MCCD1    | MCCD1    | -      |
| hsa-miR-637 | MCM5     | MCM5     | -      |
| hsa-miR-637 | MECR     | MECR     | -      |
| hsa-miR-637 | MED19    | MED19    | -      |
| hsa-miR-637 | MED8     | MED8     | -      |
| hsa-miR-637 | MEF2D    | MEF2D    | -      |
| hsa-miR-637 | MEIS1    | MEIS1    | -      |
| hsa-miR-637 | MEN1     | MEN1     | -      |
| hsa-miR-637 | MEPCE    | MEPCE    | -      |
| hsa-miR-637 | MESDC1   | MESDC1   | -      |
| hsa-miR-637 | MESP2    | MESP2    | -      |
| hsa-miR-637 | METTL6   | METTL6   | -      |
| hsa-miR-637 | MEX3C    | MEX3C    | -      |
| hsa-miR-637 | MFGE8    | MFGE8    | -      |
| hsa-miR-637 | MFI2     | MFI2     | -      |
| hsa-miR-637 | MFRP     | MFRP     | -      |
| hsa-miR-637 | MGA      | MGA      | -      |
| hsa-miR-637 | MGAT1    | MGAT1    | -      |
| hsa-miR-637 | MGAT5B   | MGAT5B   | -      |
| hsa-miR-637 | MGP      | MGP      | -      |
| hsa-miR-637 | MICAL3   | MICAL3   | -      |
| hsa-miR-637 | MIP      | MIP      | -      |
| hsa-miR-637 | MKI67    | MKI67    | -      |
| hsa-miR-637 | MKX      | MKX      | -      |
| hsa-miR-637 | MLST8    | MLST8    | -      |
| hsa-miR-637 | MLXIPL   | MLXIPL   | -      |
| hsa-miR-637 | MMP13    | MMP13    | -      |
| hsa-miR-637 | MMP19    | MMP19    | -      |
| hsa-miR-637 | MMP28    | MMP28    | -      |

|             |         |         |        |
|-------------|---------|---------|--------|
| hsa-miR-637 | MND1    | MND1    | -      |
| hsa-miR-637 | MNT     | MNT     | -      |
| hsa-miR-637 | MOBKL2A | MOBKL2A | -      |
| hsa-miR-637 | MOBP    | MOBP    | -      |
| hsa-miR-637 | MOCS1   | MOCS1   | -      |
| hsa-miR-637 | MOCS3   | MOCS3   | -      |
| hsa-miR-637 | MOGS    | MOGS    | -      |
| hsa-miR-637 | MORN3   | MORN3   | -      |
| hsa-miR-637 | MOSPD3  | MOSPD3  | -      |
| hsa-miR-637 | MPL     | MPL     | -      |
| hsa-miR-637 | MPP7    | MPP7    | -      |
| hsa-miR-637 | MPPE1   | MPPE1   | -      |
| hsa-miR-637 | MPZ     | MPZ     | -      |
| hsa-miR-637 | MRPL12  | -       | MRPL12 |
| hsa-miR-637 | MRPL19  | MRPL19  | -      |
| hsa-miR-637 | MRPL30  | MRPL30  | -      |
| hsa-miR-637 | MRPS16  | MRPS16  | -      |
| hsa-miR-637 | MSC     | MSC     | -      |
| hsa-miR-637 | MSI1    | MSI1    | -      |
| hsa-miR-637 | MSL1    | MSL1    | -      |
| hsa-miR-637 | MSR1    | MSR1    | -      |
| hsa-miR-637 | MTHFD1  | -       | MTHFD1 |
| hsa-miR-637 | MUC16   | MUC16   | -      |
| hsa-miR-637 | MX2     | MX2     | -      |
| hsa-miR-637 | MYBBP1A | MYBBP1A | -      |
| hsa-miR-637 | MYBPH   | -       | MYBPH  |
| hsa-miR-637 | MYO15A  | MYO15A  | -      |
| hsa-miR-637 | MYO3B   | MYO3B   | -      |
| hsa-miR-637 | MYO6    | MYO6    | -      |
| hsa-miR-637 | MYO7B   | -       | MYO7B  |
| hsa-miR-637 | MYO9B   | MYO9B   | -      |
| hsa-miR-637 | MYOG    | MYOG    | -      |
| hsa-miR-637 | MYOM3   | MYOM3   | -      |
| hsa-miR-637 | MYOZ2   | MYOZ2   | -      |
| hsa-miR-637 | N4BP3   | N4BP3   | -      |
| hsa-miR-637 | NAA40   | NAA40   | -      |
| hsa-miR-637 | NAB2    | NAB2    | -      |
| hsa-miR-637 | NANOS2  | NANOS2  | -      |
| hsa-miR-637 | NAP1L5  | NAP1L5  | -      |
| hsa-miR-637 | NAPA    | NAPA    | -      |
| hsa-miR-637 | NAPB    | NAPB    | -      |
| hsa-miR-637 | -       | NARF    | NARF   |
| hsa-miR-637 | NAT8L   | -       | NAT8L  |
| hsa-miR-637 | NAV1    | NAV1    | -      |
| hsa-miR-637 | NCAPH2  | NCAPH2  | -      |
| hsa-miR-637 | NCDN    | NCDN    | -      |
| hsa-miR-637 | NCKAP5L | NCKAP5L | -      |
| hsa-miR-637 | NCKIPSD | NCKIPSD | -      |
| hsa-miR-637 | NCLN    | NCLN    | -      |
| hsa-miR-637 | NCOR2   | -       | NCOR2  |
| hsa-miR-637 | NDRG2   | NDRG2   | -      |

|             |         |         |        |
|-------------|---------|---------|--------|
| hsa-miR-637 | NDRG4   | NDRG4   | -      |
| hsa-miR-637 | NECAB3  | NECAB3  | -      |
| hsa-miR-637 | NETO1   | NETO1   | -      |
| hsa-miR-637 | NEU3    | NEU3    | -      |
| hsa-miR-637 | NEURL1B | NEURL1B | -      |
| hsa-miR-637 | NFATC4  | NFATC4  | -      |
| hsa-miR-637 | NFIA    | NFIA    | -      |
| hsa-miR-637 | NFKB2   | NFKB2   | -      |
| hsa-miR-637 | NFKBIB  | NFKBIB  | -      |
| hsa-miR-637 | NFKBID  | NFKBID  | -      |
| hsa-miR-637 | NFRKB   | NFRKB   | -      |
| hsa-miR-637 | NFYA    | NFYA    | -      |
| hsa-miR-637 | NFYC    | -       | NFYC   |
| hsa-miR-637 | NGB     | NGB     | -      |
| hsa-miR-637 | NHLH1   | NHLH1   | -      |
| hsa-miR-637 | NID1    | NID1    | -      |
| hsa-miR-637 | NKAIN3  | NKAIN3  | -      |
| hsa-miR-637 | NKAIN4  | NKAIN4  | -      |
| hsa-miR-637 | NKD1    | -       | NKD1   |
| hsa-miR-637 | NKPD1   | NKPD1   | -      |
| hsa-miR-637 | NLRP12  | NLRP12  | -      |
| hsa-miR-637 | NME4    | NME4    | -      |
| hsa-miR-637 | NMT1    | NMT1    | -      |
| hsa-miR-637 | NMUR1   | NMUR1   | -      |
| hsa-miR-637 | NOD2    | NOD2    | -      |
| hsa-miR-637 | NONO    | NONO    | -      |
| hsa-miR-637 | NOS1AP  | -       | NOS1AP |
| hsa-miR-637 | NOS2    | NOS2    | -      |
| hsa-miR-637 | NOTCH1  | NOTCH1  | -      |
| hsa-miR-637 | NOTCH3  | NOTCH3  | -      |
| hsa-miR-637 | NPRL3   | NPRL3   | -      |
| hsa-miR-637 | NROB2   | -       | NROB2  |
| hsa-miR-637 | NR3C2   | NR3C2   | -      |
| hsa-miR-637 | NRBP1   | NRBP1   | -      |
| hsa-miR-637 | NRBP2   | NRBP2   | -      |
| hsa-miR-637 | NRSN1   | NRSN1   | -      |
| hsa-miR-637 | NRXN2   | NRXN2   | -      |
| hsa-miR-637 | NRXN3   | NRXN3   | -      |
| hsa-miR-637 | NT5C2   | NT5C2   | -      |
| hsa-miR-637 | NUDT16  | -       | NUDT16 |
| hsa-miR-637 | NUDT18  | NUDT18  | -      |
| hsa-miR-637 | NUPR1   | NUPR1   | -      |
| hsa-miR-637 | NWD1    | NWD1    | -      |
| hsa-miR-637 | NXPH4   | NXPH4   | -      |
| hsa-miR-637 | ODF4    | ODF4    | -      |
| hsa-miR-637 | ODZ4    | ODZ4    | -      |
| hsa-miR-637 | OGG1    | OGG1    | -      |
| hsa-miR-637 | OLFM2   | OLFM2   | -      |
| hsa-miR-637 | -       | OPLAH   | OPLAH  |
| hsa-miR-637 | OPN4    | OPN4    | -      |
| hsa-miR-637 | OPRM1   | OPRM1   | -      |

|             |           |           |       |
|-------------|-----------|-----------|-------|
| hsa-miR-637 | OR51E1    | OR51E1    | -     |
| hsa-miR-637 | ORMDL3    | ORMDL3    | -     |
| hsa-miR-637 | OSBP2     | OSBP2     | -     |
| hsa-miR-637 | OSBPL7    | OSBPL7    | -     |
| hsa-miR-637 | OSCAR     | OSCAR     | -     |
| hsa-miR-637 | OSM       | OSM       | -     |
| hsa-miR-637 | OVOL1     | -         | OVOL1 |
| hsa-miR-637 | P2RX1     | P2RX1     | -     |
| hsa-miR-637 | P2RX6     | P2RX6     | -     |
| hsa-miR-637 | P2RY2     | P2RY2     | -     |
| hsa-miR-637 | PABPC1L2A | PABPC1L2A | -     |
| hsa-miR-637 | PABPC1L2B | PABPC1L2B | -     |
| hsa-miR-637 | PABPC4    | PABPC4    | -     |
| hsa-miR-637 | PACS1     | PACS1     | -     |
| hsa-miR-637 | PAC SIN1  | PAC SIN1  | -     |
| hsa-miR-637 | PADI1     | PADI1     | -     |
| hsa-miR-637 | PAFAH1B2  | PAFAH1B2  | -     |
| hsa-miR-637 | PAPPA     | PAPPA     | -     |
| hsa-miR-637 | PAQR3     | PAQR3     | -     |
| hsa-miR-637 | PAQR9     | PAQR9     | -     |
| hsa-miR-637 | PARL      | PARL      | -     |
| hsa-miR-637 | PARVA     | PARVA     | -     |
| hsa-miR-637 | PARVB     | PARVB     | -     |
| hsa-miR-637 | PARVG     | PARVG     | -     |
| hsa-miR-637 | PAX2      | PAX2      | -     |
| hsa-miR-637 | PAX5      | PAX5      | -     |
| hsa-miR-637 | PAX8      | PAX8      | -     |
| hsa-miR-637 | PCBD2     | PCBD2     | -     |
| hsa-miR-637 | PCDH1     | PCDH1     | -     |
| hsa-miR-637 | PCDH15    | PCDH15    | -     |
| hsa-miR-637 | PCDHGA1   | PCDHGA1   | -     |
| hsa-miR-637 | PCDHGA10  | PCDHGA10  | -     |
| hsa-miR-637 | PCDHGA11  | PCDHGA11  | -     |
| hsa-miR-637 | PCDHGA12  | PCDHGA12  | -     |
| hsa-miR-637 | PCDHGA2   | PCDHGA2   | -     |
| hsa-miR-637 | PCDHGA3   | PCDHGA3   | -     |
| hsa-miR-637 | PCDHGA4   | PCDHGA4   | -     |
| hsa-miR-637 | PCDHGA5   | PCDHGA5   | -     |
| hsa-miR-637 | PCDHGA6   | PCDHGA6   | -     |
| hsa-miR-637 | PCDHGA7   | PCDHGA7   | -     |
| hsa-miR-637 | PCDHGA8   | PCDHGA8   | -     |
| hsa-miR-637 | PCDHGA9   | PCDHGA9   | -     |
| hsa-miR-637 | PCDHGB1   | PCDHGB1   | -     |
| hsa-miR-637 | PCDHGB2   | PCDHGB2   | -     |
| hsa-miR-637 | PCDHGB3   | PCDHGB3   | -     |
| hsa-miR-637 | PCDHGB4   | PCDHGB4   | -     |
| hsa-miR-637 | PCDHGB5   | PCDHGB5   | -     |
| hsa-miR-637 | PCDHGB6   | PCDHGB6   | -     |
| hsa-miR-637 | PCDHGB7   | PCDHGB7   | -     |
| hsa-miR-637 | PCDHGC3   | PCDHGC3   | -     |
| hsa-miR-637 | PCDHGC4   | PCDHGC4   | -     |

|             |          |          |         |
|-------------|----------|----------|---------|
| hsa-miR-637 | PCDHGC5  | PCDHGC5  | -       |
| hsa-miR-637 | PCGF1    | PCGF1    | -       |
| hsa-miR-637 | PCGF2    | PCGF2    | -       |
| hsa-miR-637 | PCNT     | PCNT     | -       |
| hsa-miR-637 | PCNXL3   | -        | PCNXL3  |
| hsa-miR-637 | PCSK6    | PCSK6    | -       |
| hsa-miR-637 | PDE4A    | PDE4A    | -       |
| hsa-miR-637 | PDE4C    | PDE4C    | -       |
| hsa-miR-637 | PDE7A    | PDE7A    | -       |
| hsa-miR-637 | PDGFRB   | PDGFRB   | -       |
| hsa-miR-637 | PDIA4    | -        | PDIA4   |
| hsa-miR-637 | PDK2     | PDK2     | -       |
| hsa-miR-637 | PDRG1    | -        | PDRG1   |
| hsa-miR-637 | PDZD2    | PDZD2    | -       |
| hsa-miR-637 | PECR     | PECR     | -       |
| hsa-miR-637 | PELI3    | PELI3    | -       |
| hsa-miR-637 | PER1     | PER1     | -       |
| hsa-miR-637 | PEX10    | PEX10    | -       |
| hsa-miR-637 | PEX11G   | -        | PEX11G  |
| hsa-miR-637 | PEX14    | PEX14    | -       |
| hsa-miR-637 | PEX5     | PEX5     | -       |
| hsa-miR-637 | PEX6     | PEX6     | -       |
| hsa-miR-637 | PGAM5    | PGAM5    | -       |
| hsa-miR-637 | PGAP1    | PGAP1    | -       |
| hsa-miR-637 | PGGT1B   | PGGT1B   | -       |
| hsa-miR-637 | PHB      | PHB      | -       |
| hsa-miR-637 | PHB2     | PHB2     | -       |
| hsa-miR-637 | PHC2     | PHC2     | -       |
| hsa-miR-637 | PHF16    | PHF16    | -       |
| hsa-miR-637 | PHF20L1  | PHF20L1  | -       |
| hsa-miR-637 | PHLDB1   | -        | PHLDB1  |
| hsa-miR-637 | PHLPP1   | PHLPP1   | -       |
| hsa-miR-637 | PHOX2A   | PHOX2A   | -       |
| hsa-miR-637 | PIAS1    | PIAS1    | -       |
| hsa-miR-637 | PICK1    | PICK1    | -       |
| hsa-miR-637 | PIK3IP1  | PIK3IP1  | -       |
| hsa-miR-637 | PIM3     | -        | PIM3    |
| hsa-miR-637 | PIN1     | -        | PIN1    |
| hsa-miR-637 | PIP4K2B  | PIP4K2B  | -       |
| hsa-miR-637 | PIP4K2C  | PIP4K2C  | -       |
| hsa-miR-637 | PIP5K1A  | PIP5K1A  | -       |
| hsa-miR-637 | PIP5K1C  | PIP5K1C  | -       |
| hsa-miR-637 | PISD     | -        | PISD    |
| hsa-miR-637 | PITPNA   | PITPNA   | -       |
| hsa-miR-637 | PITPNM1  | -        | PITPNM1 |
| hsa-miR-637 | PKHD1    | PKHD1    | -       |
| hsa-miR-637 | PKM2     | PKM2     | -       |
| hsa-miR-637 | PKNOX2   | PKNOX2   | -       |
| hsa-miR-637 | PLA2G12A | PLA2G12A | -       |
| hsa-miR-637 | PLA2G5   | -        | PLA2G5  |
| hsa-miR-637 | PLAC4    | PLAC4    | -       |

|             |           |           |         |
|-------------|-----------|-----------|---------|
| hsa-miR-637 | PLAG1     | PLAG1     | -       |
| hsa-miR-637 | PLCB2     | PLCB2     | -       |
| hsa-miR-637 | PLCB3     | PLCB3     | -       |
| hsa-miR-637 | PLCD3     | PLCD3     | -       |
| hsa-miR-637 | PLD6      | PLD6      | -       |
| hsa-miR-637 | PLDN      | PLDN      | -       |
| hsa-miR-637 | PLEKHG2   | PLEKHG2   | -       |
| hsa-miR-637 | PLEKHG5   | PLEKHG5   | -       |
| hsa-miR-637 | PLEKHJ1   | -         | PLEKHJ1 |
| hsa-miR-637 | PLEKHM1   | PLEKHM1   | -       |
| hsa-miR-637 | PLK3      | PLK3      | -       |
| hsa-miR-637 | PLVAP     | PLVAP     | -       |
| hsa-miR-637 | PML       | PML       | -       |
| hsa-miR-637 | PNCK      | PNCK      | -       |
| hsa-miR-637 | PNMA3     | PNMA3     | -       |
| hsa-miR-637 | PNOC      | -         | PNOC    |
| hsa-miR-637 | PNPLA5    | PNPLA5    | -       |
| hsa-miR-637 | PNPO      | PNPO      | -       |
| hsa-miR-637 | POGZ      | POGZ      | -       |
| hsa-miR-637 | -         | POLD4     | POLD4   |
| hsa-miR-637 | -         | POLN      | POLN    |
| hsa-miR-637 | POLR1D    | POLR1D    | -       |
| hsa-miR-637 | POLR2E    | -         | POLR2E  |
| hsa-miR-637 | POLR3D    | POLR3D    | -       |
| hsa-miR-637 | POLR3F    | POLR3F    | -       |
| hsa-miR-637 | POLRMT    | POLRMT    | -       |
| hsa-miR-637 | POM121L12 | POM121L12 | -       |
| hsa-miR-637 | POMGNT1   | POMGNT1   | -       |
| hsa-miR-637 | POMT2     | POMT2     | -       |
| hsa-miR-637 | POP4      | POP4      | -       |
| hsa-miR-637 | POR       | -         | POR     |
| hsa-miR-637 | POU6F1    | POU6F1    | -       |
| hsa-miR-637 | PPAN      | -         | PPAN    |
| hsa-miR-637 | PPARGC1A  | PPARGC1A  | -       |
| hsa-miR-637 | PPCDC     | PPCDC     | -       |
| hsa-miR-637 | PPIE      | PPIE      | -       |
| hsa-miR-637 | PPIL1     | PPIL1     | -       |
| hsa-miR-637 | PPM1H     | PPM1H     | -       |
| hsa-miR-637 | PPP1R10   | PPP1R10   | -       |
| hsa-miR-637 | PPP1R13L  | PPP1R13L  | -       |
| hsa-miR-637 | PPP1R1B   | PPP1R1B   | -       |
| hsa-miR-637 | PPP1R9B   | PPP1R9B   | -       |
| hsa-miR-637 | PPP2R1A   | PPP2R1A   | -       |
| hsa-miR-637 | PPP2R1B   | PPP2R1B   | -       |
| hsa-miR-637 | PPP2R4    | PPP2R4    | -       |
| hsa-miR-637 | PPP2R5D   | PPP2R5D   | -       |
| hsa-miR-637 | PPP3CB    | PPP3CB    | -       |
| hsa-miR-637 | PPT2      | PPT2      | -       |
| hsa-miR-637 | PQLC1     | PQLC1     | -       |
| hsa-miR-637 | PRAF2     | PRAF2     | -       |
| hsa-miR-637 | PRCC      | -         | PRCC    |



|             |           |           |        |
|-------------|-----------|-----------|--------|
| hsa-miR-637 | PRCD      | PRCD      | -      |
| hsa-miR-637 | PRDM1     | PRDM1     | -      |
| hsa-miR-637 | PRDM12    | PRDM12    | -      |
| hsa-miR-637 | PRDM6     | PRDM6     | -      |
| hsa-miR-637 | PRDM9     | PRDM9     | -      |
| hsa-miR-637 | PRELID1   | PRELID1   | -      |
| hsa-miR-637 | PRIM2     | PRIM2     | -      |
| hsa-miR-637 | PRIMA1    | -         | PRIMA1 |
| hsa-miR-637 | PRKAG1    | PRKAG1    | -      |
| hsa-miR-637 | PRKAR1B   | PRKAR1B   | -      |
| hsa-miR-637 | PRKAR2B   | PRKAR2B   | -      |
| hsa-miR-637 | PRKCG     | PRKCG     | -      |
| hsa-miR-637 | PRKCSH    | -         | PRKCSH |
| hsa-miR-637 | PRM2      | PRM2      | -      |
| hsa-miR-637 | PROM1     | PROM1     | -      |
| hsa-miR-637 | PROSC     | PROSC     | -      |
| hsa-miR-637 | PRPF38A   | PRPF38A   | -      |
| hsa-miR-637 | PRPF40A   | PRPF40A   | -      |
| hsa-miR-637 | PRPF40B   | PRPF40B   | -      |
| hsa-miR-637 | PRPF4B    | PRPF4B    | -      |
| hsa-miR-637 | PRPH2     | PRPH2     | -      |
| hsa-miR-637 | PRR5L     | PRR5L     | -      |
| hsa-miR-637 | PRRT1     | PRRT1     | -      |
| hsa-miR-637 | PRTFDC1   | PRTFDC1   | -      |
| hsa-miR-637 | PSCA      | PSCA      | -      |
| hsa-miR-637 | PSG1      | PSG1      | -      |
| hsa-miR-637 | PSG11     | PSG11     | -      |
| hsa-miR-637 | PSG3      | PSG3      | -      |
| hsa-miR-637 | PSG9      | PSG9      | -      |
| hsa-miR-637 | PSKH1     | PSKH1     | -      |
| hsa-miR-637 | PSMB8     | PSMB8     | -      |
| hsa-miR-637 | PSMC4     | PSMC4     | -      |
| hsa-miR-637 | PSMD3     | -         | PSMD3  |
| hsa-miR-637 | PSTPIP2   | PSTPIP2   | -      |
| hsa-miR-637 | PTCD1     | PTCD1     | -      |
| hsa-miR-637 | PTGDR     | PTGDR     | -      |
| hsa-miR-637 | -         | PTGDS     | PTGDS  |
| hsa-miR-637 | PTMS      | PTMS      | -      |
| hsa-miR-637 | PTOV1     | -         | PTOV1  |
| hsa-miR-637 | PTPN18    | PTPN18    | -      |
| hsa-miR-637 | PTPN3     | PTPN3     | -      |
| hsa-miR-637 | PTPRH     | PTPRH     | -      |
| hsa-miR-637 | PTPRS     | -         | PTPRS  |
| hsa-miR-637 | PVRL1     | PVRL1     | -      |
| hsa-miR-637 | PVRL2     | PVRL2     | -      |
| hsa-miR-637 | PXN       | PXN       | -      |
| hsa-miR-637 | PYCR1     | PYCR1     | -      |
| hsa-miR-637 | PYCRL     | PYCRL     | -      |
| hsa-miR-637 | PYGB      | PYGB      | -      |
| hsa-miR-637 | PYGO2     | PYGO2     | -      |
| hsa-miR-637 | ProSAPiP1 | ProSAPiP1 | -      |

|             |          |         |          |
|-------------|----------|---------|----------|
| hsa-miR-637 | QKI      | QKI     | -        |
| hsa-miR-637 | QRSL1    | QRSL1   | -        |
| hsa-miR-637 | QSOX1    | QSOX1   | -        |
| hsa-miR-637 | QSOX2    | QSOX2   | -        |
| hsa-miR-637 | R3HDM2   | R3HDM2  | -        |
| hsa-miR-637 | RAB12    | RAB12   | -        |
| hsa-miR-637 | RAB3A    | RAB3A   | -        |
| hsa-miR-637 | RAB3IL1  | RAB3IL1 | -        |
| hsa-miR-637 | RAB3IP   | RAB3IP  | -        |
| hsa-miR-637 | RAB5B    | RAB5B   | -        |
| hsa-miR-637 | RABGAP1  | RABGAP1 | -        |
| hsa-miR-637 | RABIF    | RABIF   | -        |
| hsa-miR-637 | RALY     | RALY    | -        |
| hsa-miR-637 | RALYL    | RALYL   | -        |
| hsa-miR-637 | RARG     | RARG    | -        |
| hsa-miR-637 | RARRES2  | -       | RARRES2  |
| hsa-miR-637 | RASA3    | RASA3   | -        |
| hsa-miR-637 | RASA4    | RASA4   | -        |
| hsa-miR-637 | RASGEF1C | -       | RASGEF1C |
| hsa-miR-637 | RASL10A  | -       | RASL10A  |
| hsa-miR-637 | RASL10B  | RASL10B | -        |
| hsa-miR-637 | RASSF1   | RASSF1  | -        |
| hsa-miR-637 | RBM42    | RBM42   | -        |
| hsa-miR-637 | RBM47    | RBM47   | -        |
| hsa-miR-637 | RBM8A    | RBM8A   | -        |
| hsa-miR-637 | -        | RBM9    | RBM9     |
| hsa-miR-637 | RBPJL    | RBPJL   | -        |
| hsa-miR-637 | RCCD1    | RCCD1   | -        |
| hsa-miR-637 | RELA     | RELA    | -        |
| hsa-miR-637 | RELT     | RELT    | -        |
| hsa-miR-637 | RERE     | RERE    | -        |
| hsa-miR-637 | RET      | RET     | -        |
| hsa-miR-637 | RFX1     | RFX1    | -        |
| hsa-miR-637 | RFX4     | RFX4    | -        |
| hsa-miR-637 | RGAG4    | RGAG4   | -        |
| hsa-miR-637 | RGS11    | RGS11   | -        |
| hsa-miR-637 | -        | RGS12   | RGS12    |
| hsa-miR-637 | RGS6     | -       | RGS6     |
| hsa-miR-637 | RGSL1    | RGSL1   | -        |
| hsa-miR-637 | RHBDD3   | -       | RHBDD3   |
| hsa-miR-637 | RHBDF2   | RHBDF2  | -        |
| hsa-miR-637 | RHBDL3   | RHBDL3  | -        |
| hsa-miR-637 | RHO      | RHO     | -        |
| hsa-miR-637 | RHOA     | RHOA    | -        |
| hsa-miR-637 | RHOF     | RHOF    | -        |
| hsa-miR-637 | RIN1     | -       | RIN1     |
| hsa-miR-637 | RIN2     | RIN2    | -        |
| hsa-miR-637 | RIN3     | RIN3    | -        |
| hsa-miR-637 | RIPK3    | RIPK3   | -        |
| hsa-miR-637 | RIPPLY1  | RIPPLY1 | -        |
| hsa-miR-637 | RNASE13  | RNASE13 | -        |

|             |         |         |        |
|-------------|---------|---------|--------|
| hsa-miR-637 | RND2    | RND2    | -      |
| hsa-miR-637 | RNF103  | RNF103  | -      |
| hsa-miR-637 | RNF111  | RNF111  | -      |
| hsa-miR-637 | RNF125  | RNF125  | -      |
| hsa-miR-637 | RNF126  | -       | RNF126 |
| hsa-miR-637 | RNF141  | RNF141  | -      |
| hsa-miR-637 | RNF157  | RNF157  | -      |
| hsa-miR-637 | RNF165  | RNF165  | -      |
| hsa-miR-637 | RNF170  | RNF170  | -      |
| hsa-miR-637 | RNF175  | RNF175  | -      |
| hsa-miR-637 | RNF207  | RNF207  | -      |
| hsa-miR-637 | -       | RNF212  | RNF212 |
| hsa-miR-637 | RNF220  | RNF220  | -      |
| hsa-miR-637 | RNF38   | RNF38   | -      |
| hsa-miR-637 | RNF4    | RNF4    | -      |
| hsa-miR-637 | ROBO3   | ROBO3   | -      |
| hsa-miR-637 | RPAP3   | RPAP3   | -      |
| hsa-miR-637 | RPL28   | RPL28   | -      |
| hsa-miR-637 | RPL34   | RPL34   | -      |
| hsa-miR-637 | RPP30   | RPP30   | -      |
| hsa-miR-637 | RRAS    | RRAS    | -      |
| hsa-miR-637 | RRN3    | RRN3    | -      |
| hsa-miR-637 | RRP12   | -       | RRP12  |
| hsa-miR-637 | RTBDN   | RTBDN   | -      |
| hsa-miR-637 | RTN2    | -       | RTN2   |
| hsa-miR-637 | RTN4R   | RTN4R   | -      |
| hsa-miR-637 | RUNDC3A | RUNDC3A | -      |
| hsa-miR-637 | RXRB    | RXRB    | -      |
| hsa-miR-637 | S100PBP | S100PBP | -      |
| hsa-miR-637 | S1PR2   | S1PR2   | -      |
| hsa-miR-637 | S1PR3   | S1PR3   | -      |
| hsa-miR-637 | SAA4    | SAA4    | -      |
| hsa-miR-637 | SAP30BP | SAP30BP | -      |
| hsa-miR-637 | SASH3   | SASH3   | -      |
| hsa-miR-637 | SBNO2   | SBNO2   | -      |
| hsa-miR-637 | SC5DL   | SC5DL   | -      |
| hsa-miR-637 | SCAMP4  | SCAMP4  | -      |
| hsa-miR-637 | SCARF1  | SCARF1  | -      |
| hsa-miR-637 | SCARF2  | SCARF2  | -      |
| hsa-miR-637 | SCML2   | SCML2   | -      |
| hsa-miR-637 | SCN5A   | SCN5A   | -      |
| hsa-miR-637 | SCP2    | SCP2    | -      |
| hsa-miR-637 | SCRIB   | SCRIB   | -      |
| hsa-miR-637 | SCRT2   | SCRT2   | -      |
| hsa-miR-637 | SCUBE3  | SCUBE3  | -      |
| hsa-miR-637 | SDC1    | -       | SDC1   |
| hsa-miR-637 | SDC3    | SDC3    | -      |
| hsa-miR-637 | SDC4    | SDC4    | -      |
| hsa-miR-637 | SDK2    | SDK2    | -      |
| hsa-miR-637 | SEC11A  | SEC11A  | -      |
| hsa-miR-637 | SEC14L2 | SEC14L2 | -      |

|             |           |           |         |
|-------------|-----------|-----------|---------|
| hsa-miR-637 | SEC22C    | SEC22C    | -       |
| hsa-miR-637 | SEC31B    | SEC31B    | -       |
| hsa-miR-637 | SEC61A1   | SEC61A1   | -       |
| hsa-miR-637 | SELL      | SELL      | -       |
| hsa-miR-637 | SELPLG    | SELPLG    | -       |
| hsa-miR-637 | SEMA3D    | SEMA3D    | -       |
| hsa-miR-637 | SEMA4A    | SEMA4A    | -       |
| hsa-miR-637 | SEMA6B    | SEMA6B    | -       |
| hsa-miR-637 | SEMA6C    | SEMA6C    | -       |
| hsa-miR-637 | SEPT3     | SEPT3     | -       |
| hsa-miR-637 | SEPT5     | -         | SEPT5   |
| hsa-miR-637 | SEPT6     | -         | SEPT6   |
| hsa-miR-637 | SEPT8     | SEPT8     | -       |
| hsa-miR-637 | SEPT9     | SEPT9     | -       |
| hsa-miR-637 | SEPX1     | SEPX1     | -       |
| hsa-miR-637 | SERPINA10 | SERPINA10 | -       |
| hsa-miR-637 | SERPINH1  | SERPINH1  | -       |
| hsa-miR-637 | SETD1B    | SETD1B    | -       |
| hsa-miR-637 | SETD8     | -         | SETD8   |
| hsa-miR-637 | SETDB1    | SETDB1    | -       |
| hsa-miR-637 | SEZ6L     | SEZ6L     | -       |
| hsa-miR-637 | SF3A2     | SF3A2     | -       |
| hsa-miR-637 | SF3A3     | SF3A3     | -       |
| hsa-miR-637 | SFRP5     | SFRP5     | -       |
| hsa-miR-637 | SFTPA1    | SFTPA1    | -       |
| hsa-miR-637 | SFXN3     | SFXN3     | -       |
| hsa-miR-637 | SGSM2     | SGSM2     | -       |
| hsa-miR-637 | SH2D5     | SH2D5     | -       |
| hsa-miR-637 | SH3BP2    | -         | SH3BP2  |
| hsa-miR-637 | SH3GLB2   | -         | SH3GLB2 |
| hsa-miR-637 | SHB       | -         | SHB     |
| hsa-miR-637 | -         | SHBG      | SHBG    |
| hsa-miR-637 | SHISA2    | SHISA2    | -       |
| hsa-miR-637 | SHISA9    | SHISA9    | -       |
| hsa-miR-637 | SHOX      | SHOX      | -       |
| hsa-miR-637 | SHROOM4   | -         | SHROOM4 |
| hsa-miR-637 | SIDT1     | SIDT1     | -       |
| hsa-miR-637 | SIDT2     | SIDT2     | -       |
| hsa-miR-637 | SIGLEC1   | SIGLEC1   | -       |
| hsa-miR-637 | SIK2      | SIK2      | -       |
| hsa-miR-637 | SIRPB1    | SIRPB1    | -       |
| hsa-miR-637 | SIRT5     | SIRT5     | -       |
| hsa-miR-637 | SLC11A1   | SLC11A1   | -       |
| hsa-miR-637 | SLC12A4   | SLC12A4   | -       |
| hsa-miR-637 | SLC12A5   | SLC12A5   | -       |
| hsa-miR-637 | SLC12A6   | SLC12A6   | -       |
| hsa-miR-637 | SLC13A3   | SLC13A3   | -       |
| hsa-miR-637 | SLC15A1   | SLC15A1   | -       |
| hsa-miR-637 | SLC16A12  | SLC16A12  | -       |
| hsa-miR-637 | SLC17A2   | SLC17A2   | -       |
| hsa-miR-637 | SLC17A9   | SLC17A9   | -       |

|             |          |          |          |
|-------------|----------|----------|----------|
| hsa-miR-637 | SLC19A1  | SLC19A1  | -        |
| hsa-miR-637 | SLC20A2  | SLC20A2  | -        |
| hsa-miR-637 | SLC22A11 | SLC22A11 | -        |
| hsa-miR-637 | SLC24A6  | SLC24A6  | -        |
| hsa-miR-637 | SLC25A14 | SLC25A14 | -        |
| hsa-miR-637 | SLC25A17 | SLC25A17 | -        |
| hsa-miR-637 | SLC25A28 | SLC25A28 | -        |
| hsa-miR-637 | SLC25A35 | SLC25A35 | -        |
| hsa-miR-637 | SLC25A36 | SLC25A36 | -        |
| hsa-miR-637 | SLC25A42 | SLC25A42 | -        |
| hsa-miR-637 | SLC25A45 | SLC25A45 | -        |
| hsa-miR-637 | SLC26A9  | SLC26A9  | -        |
| hsa-miR-637 | SLC27A1  | -        | SLC27A1  |
| hsa-miR-637 | SLC2A4RG | SLC2A4RG | -        |
| hsa-miR-637 | SLC35A2  | -        | SLC35A2  |
| hsa-miR-637 | SLC35C1  | SLC35C1  | -        |
| hsa-miR-637 | SLC36A1  | SLC36A1  | -        |
| hsa-miR-637 | SLC37A1  | SLC37A1  | -        |
| hsa-miR-637 | SLC38A3  | SLC38A3  | -        |
| hsa-miR-637 | SLC39A1  | SLC39A1  | -        |
| hsa-miR-637 | SLC45A3  | SLC45A3  | -        |
| hsa-miR-637 | SLC46A2  | SLC46A2  | -        |
| hsa-miR-637 | SLC6A17  | SLC6A17  | -        |
| hsa-miR-637 | SLC7A6   | SLC7A6   | -        |
| hsa-miR-637 | SLC8A2   | SLC8A2   | -        |
| hsa-miR-637 | SLC9A3R2 | -        | SLC9A3R2 |
| hsa-miR-637 | SLCO2A1  | SLCO2A1  | -        |
| hsa-miR-637 | SLFN11   | SLFN11   | -        |
| hsa-miR-637 | SLFN5    | SLFN5    | -        |
| hsa-miR-637 | SMAD6    | SMAD6    | -        |
| hsa-miR-637 | SMARCAD1 | SMARCAD1 | -        |
| hsa-miR-637 | SMARCD1  | SMARCD1  | -        |
| hsa-miR-637 | SMTNL2   | -        | SMTNL2   |
| hsa-miR-637 | SMYD1    | SMYD1    | -        |
| hsa-miR-637 | SMYD5    | SMYD5    | -        |
| hsa-miR-637 | SNAI1    | SNAI1    | -        |
| hsa-miR-637 | SNAPC2   | -        | SNAPC2   |
| hsa-miR-637 | SNCB     | SNCB     | -        |
| hsa-miR-637 | SNPH     | SNPH     | -        |
| hsa-miR-637 | SNRNP27  | SNRNP27  | -        |
| hsa-miR-637 | SNRPE    | SNRPE    | -        |
| hsa-miR-637 | SNTA1    | SNTA1    | -        |
| hsa-miR-637 | SNX17    | SNX17    | -        |
| hsa-miR-637 | SNX29    | SNX29    | -        |
| hsa-miR-637 | SOLH     | SOLH     | -        |
| hsa-miR-637 | SORCS2   | SORCS2   | -        |
| hsa-miR-637 | SORCS3   | SORCS3   | -        |
| hsa-miR-637 | SOX10    | SOX10    | -        |
| hsa-miR-637 | SOX13    | SOX13    | -        |
| hsa-miR-637 | SOX17    | SOX17    | -        |
| hsa-miR-637 | SOX4     | SOX4     | -        |

|             |          |          |         |
|-------------|----------|----------|---------|
| hsa-miR-637 | SP7      | SP7      | -       |
| hsa-miR-637 | SPCS1    | SPCS1    | -       |
| hsa-miR-637 | SPEF1    | SPEF1    | -       |
| hsa-miR-637 | SPEG     | SPEG     | -       |
| hsa-miR-637 | SPG7     | -        | SPG7    |
| hsa-miR-637 | SPN      | SPN      | -       |
| hsa-miR-637 | -        | SPON2    | SPON2   |
| hsa-miR-637 | SPR      | SPR      | -       |
| hsa-miR-637 | SPRY3    | SPRY3    | -       |
| hsa-miR-637 | SPRY4    | SPRY4    | -       |
| hsa-miR-637 | SPSB1    | SPSB1    | -       |
| hsa-miR-637 | SPTBN4   | -        | SPTBN4  |
| hsa-miR-637 | SRCIN1   | SRCIN1   | -       |
| hsa-miR-637 | SRGAP2   | SRGAP2   | -       |
| hsa-miR-637 | SRM      | -        | SRM     |
| hsa-miR-637 | SSH2     | SSH2     | -       |
| hsa-miR-637 | SSTR3    | SSTR3    | -       |
| hsa-miR-637 | ST3GAL2  | -        | ST3GAL2 |
| hsa-miR-637 | ST3GAL6  | ST3GAL6  | -       |
| hsa-miR-637 | ST5      | ST5      | -       |
| hsa-miR-637 | STAC     | STAC     | -       |
| hsa-miR-637 | STAG3    | STAG3    | -       |
| hsa-miR-637 | STAG3L1  | STAG3L1  | -       |
| hsa-miR-637 | STC1     | STC1     | -       |
| hsa-miR-637 | STK10    | STK10    | -       |
| hsa-miR-637 | STRA6    | STRA6    | -       |
| hsa-miR-637 | STRADA   | STRADA   | -       |
| hsa-miR-637 | STX18    | STX18    | -       |
| hsa-miR-637 | SUFU     | SUFU     | -       |
| hsa-miR-637 | SULF2    | SULF2    | -       |
| hsa-miR-637 | SUSD4    | SUSD4    | -       |
| hsa-miR-637 | SUV39H1  | SUV39H1  | -       |
| hsa-miR-637 | SYCE2    | SYCE2    | -       |
| hsa-miR-637 | SYK      | SYK      | -       |
| hsa-miR-637 | SYNGAP1  | SYNGAP1  | -       |
| hsa-miR-637 | SYNGR3   | SYNGR3   | -       |
| hsa-miR-637 | SYT15    | SYT15    | -       |
| hsa-miR-637 | SYT4     | SYT4     | -       |
| hsa-miR-637 | SYVN1    | SYVN1    | -       |
| hsa-miR-637 | TAF1     | TAF1     | -       |
| hsa-miR-637 | TAF1B    | TAF1B    | -       |
| hsa-miR-637 | TAL2     | -        | TAL2    |
| hsa-miR-637 | TBC1D13  | TBC1D13  | -       |
| hsa-miR-637 | TBC1D22B | TBC1D22B | -       |
| hsa-miR-637 | TBC1D25  | TBC1D25  | -       |
| hsa-miR-637 | TBC1D26  | TBC1D26  | -       |
| hsa-miR-637 | TBC1D3   | TBC1D3   | -       |
| hsa-miR-637 | TBC1D3B  | TBC1D3B  | -       |
| hsa-miR-637 | TBC1D3C  | TBC1D3C  | -       |
| hsa-miR-637 | TBC1D3F  | TBC1D3F  | -       |
| hsa-miR-637 | TBC1D3H  | TBC1D3H  | -       |

|             |          |          |         |
|-------------|----------|----------|---------|
| hsa-miR-637 | TBC1D9B  | TBC1D9B  | -       |
| hsa-miR-637 | TBKBP1   | TBKBP1   | -       |
| hsa-miR-637 | TBXA2R   | TBXA2R   | -       |
| hsa-miR-637 | TCAP     | -        | TCAP    |
| hsa-miR-637 | TCEB3    | TCEB3    | -       |
| hsa-miR-637 | TDG      | TDG      | -       |
| hsa-miR-637 | TEAD2    | TEAD2    | -       |
| hsa-miR-637 | TEKT4    | TEKT4    | -       |
| hsa-miR-637 | TERF2IP  | TERF2IP  | -       |
| hsa-miR-637 | TEX19    | TEX19    | -       |
| hsa-miR-637 | TEX264   | -        | TEX264  |
| hsa-miR-637 | TFAP2E   | TFAP2E   | -       |
| hsa-miR-637 | TFAP4    | TFAP4    | -       |
| hsa-miR-637 | TFE3     | TFE3     | -       |
| hsa-miR-637 | TFEB     | TFEB     | -       |
| hsa-miR-637 | TFR2     | TFR2     | -       |
| hsa-miR-637 | TGM3     | TGM3     | -       |
| hsa-miR-637 | THAP3    | THAP3    | -       |
| hsa-miR-637 | THBS1    | THBS1    | -       |
| hsa-miR-637 | THOC3    | THOC3    | -       |
| hsa-miR-637 | THOC6    | THOC6    | -       |
| hsa-miR-637 | THRA     | THRA     | -       |
| hsa-miR-637 | THRAP3   | THRAP3   | -       |
| hsa-miR-637 | THY1     | THY1     | -       |
| hsa-miR-637 | TIFAB    | TIFAB    | -       |
| hsa-miR-637 | TIGD6    | TIGD6    | -       |
| hsa-miR-637 | TIMM8A   | TIMM8A   | -       |
| hsa-miR-637 | TIMM8B   | TIMM8B   | -       |
| hsa-miR-637 | TINAGL1  | -        | TINAGL1 |
| hsa-miR-637 | TIPRL    | TIPRL    | -       |
| hsa-miR-637 | TIRAP    | TIRAP    | -       |
| hsa-miR-637 | TJAP1    | TJAP1    | -       |
| hsa-miR-637 | TLK2     | TLK2     | -       |
| hsa-miR-637 | TLN1     | TLN1     | -       |
| hsa-miR-637 | TLX3     | -        | TLX3    |
| hsa-miR-637 | TM2D2    | TM2D2    | -       |
| hsa-miR-637 | TMBIM1   | TMBIM1   | -       |
| hsa-miR-637 | TMBIM6   | TMBIM6   | -       |
| hsa-miR-637 | TMCC2    | TMCC2    | -       |
| hsa-miR-637 | TMEM106A | TMEM106A | -       |
| hsa-miR-637 | TMEM110  | TMEM110  | -       |
| hsa-miR-637 | TMEM125  | -        | TMEM125 |
| hsa-miR-637 | TMEM127  | TMEM127  | -       |
| hsa-miR-637 | TMEM130  | TMEM130  | -       |
| hsa-miR-637 | TMEM151A | TMEM151A | -       |
| hsa-miR-637 | TMEM185A | TMEM185A | -       |
| hsa-miR-637 | TMEM201  | TMEM201  | -       |
| hsa-miR-637 | TMEM214  | TMEM214  | -       |
| hsa-miR-637 | TMEM26   | TMEM26   | -       |
| hsa-miR-637 | TMEM55B  | TMEM55B  | -       |
| hsa-miR-637 | TMEM61   | TMEM61   | -       |

|             |           |           |           |
|-------------|-----------|-----------|-----------|
| hsa-miR-637 | TMEM63C   | TMEM63C   | -         |
| hsa-miR-637 | TMEM79    | -         | TMEM79    |
| hsa-miR-637 | TMEM8A    | TMEM8A    | -         |
| hsa-miR-637 | TMEM97    | TMEM97    | -         |
| hsa-miR-637 | TMF1      | TMF1      | -         |
| hsa-miR-637 | TMPRSS13  | TMPRSS13  | -         |
| hsa-miR-637 | TMUB2     | TMUB2     | -         |
| hsa-miR-637 | TNFAIP8L1 | TNFAIP8L1 | -         |
| hsa-miR-637 | TNFRSF10C | -         | TNFRSF10C |
| hsa-miR-637 | TNFRSF11A | TNFRSF11A | -         |
| hsa-miR-637 | TNFRSF1B  | TNFRSF1B  | -         |
| hsa-miR-637 | TNFRSF25  | TNFRSF25  | -         |
| hsa-miR-637 | TNFRSF8   | TNFRSF8   | -         |
| hsa-miR-637 | TNFSF12   | TNFSF12   | -         |
| hsa-miR-637 | TNIP2     | -         | TNIP2     |
| hsa-miR-637 | TNK2      | TNK2      | -         |
| hsa-miR-637 | TNKS      | TNKS      | -         |
| hsa-miR-637 | TNP1      | TNP1      | -         |
| hsa-miR-637 | TNRC18    | TNRC18    | -         |
| hsa-miR-637 | TOMM34    | TOMM34    | -         |
| hsa-miR-637 | TOR1A     | TOR1A     | -         |
| hsa-miR-637 | TPD52L2   | TPD52L2   | -         |
| hsa-miR-637 | TPM2      | TPM2      | -         |
| hsa-miR-637 | TRAF4     | TRAF4     | -         |
| hsa-miR-637 | TRAM2     | TRAM2     | -         |
| hsa-miR-637 | TRAPPC9   | TRAPPC9   | -         |
| hsa-miR-637 | TREML2    | TREML2    | -         |
| hsa-miR-637 | TRH       | TRH       | -         |
| hsa-miR-637 | TRIM26    | TRIM26    | -         |
| hsa-miR-637 | TRIM28    | TRIM28    | -         |
| hsa-miR-637 | TRIM3     | TRIM3     | -         |
| hsa-miR-637 | TRIM44    | TRIM44    | -         |
| hsa-miR-637 | TRIM63    | TRIM63    | -         |
| hsa-miR-637 | TRIM9     | TRIM9     | -         |
| hsa-miR-637 | TRIOBP    | -         | TRIOBP    |
| hsa-miR-637 | TRIP13    | TRIP13    | -         |
| hsa-miR-637 | TRMU      | -         | TRMU      |
| hsa-miR-637 | TRNP1     | TRNP1     | -         |
| hsa-miR-637 | TRPA1     | TRPA1     | -         |
| hsa-miR-637 | TRPC5     | TRPC5     | -         |
| hsa-miR-637 | TRPM2     | TRPM2     | -         |
| hsa-miR-637 | TRPM5     | -         | TRPM5     |
| hsa-miR-637 | TRPM7     | TRPM7     | -         |
| hsa-miR-637 | TSHZ2     | TSHZ2     | -         |
| hsa-miR-637 | TSKU      | TSKU      | -         |
| hsa-miR-637 | TSPAN1    | TSPAN1    | -         |
| hsa-miR-637 | TSPAN14   | -         | TSPAN14   |
| hsa-miR-637 | TSPAN18   | TSPAN18   | -         |
| hsa-miR-637 | TSPAN2    | TSPAN2    | -         |
| hsa-miR-637 | TSPAN3    | TSPAN3    | -         |
| hsa-miR-637 | TSPAN33   | TSPAN33   | -         |



|             |         |         |        |
|-------------|---------|---------|--------|
| hsa-miR-637 | TSPAN4  | -       | TSPAN4 |
| hsa-miR-637 | TSPYL2  | TSPYL2  | -      |
| hsa-miR-637 | TSSK1B  | TSSK1B  | -      |
| hsa-miR-637 | TTC31   | TTC31   | -      |
| hsa-miR-637 | TTLL3   | TTLL3   | -      |
| hsa-miR-637 | TUBG1   | TUBG1   | -      |
| hsa-miR-637 | TULP1   | -       | TULP1  |
| hsa-miR-637 | TUSC1   | TUSC1   | -      |
| hsa-miR-637 | TUSC2   | TUSC2   | -      |
| hsa-miR-637 | TXNIP   | TXNIP   | -      |
| hsa-miR-637 | UBAP1   | UBAP1   | -      |
| hsa-miR-637 | UBAP2L  | UBAP2L  | -      |
| hsa-miR-637 | UBE2I   | UBE2I   | -      |
| hsa-miR-637 | UBE2L3  | UBE2L3  | -      |
| hsa-miR-637 | UBE2QL1 | UBE2QL1 | -      |
| hsa-miR-637 | UBL4A   | UBL4A   | -      |
| hsa-miR-637 | UBQLN4  | UBQLN4  | -      |
| hsa-miR-637 | UBQLNL  | UBQLNL  | -      |
| hsa-miR-637 | UBR3    | UBR3    | -      |
| hsa-miR-637 | UBTD1   | UBTD1   | -      |
| hsa-miR-637 | UCN2    | UCN2    | -      |
| hsa-miR-637 | UFC1    | UFC1    | -      |
| hsa-miR-637 | UGT3A1  | UGT3A1  | -      |
| hsa-miR-637 | ULBP1   | -       | ULBP1  |
| hsa-miR-637 | -       | ULBP3   | ULBP3  |
| hsa-miR-637 | UMPS    | UMPS    | -      |
| hsa-miR-637 | UNC13A  | UNC13A  | -      |
| hsa-miR-637 | UNC45B  | UNC45B  | -      |
| hsa-miR-637 | UNC5A   | UNC5A   | -      |
| hsa-miR-637 | UNC5B   | UNC5B   | -      |
| hsa-miR-637 | UNK     | UNK     | -      |
| hsa-miR-637 | UQCC    | UQCC    | -      |
| hsa-miR-637 | URGCP   | URGCP   | -      |
| hsa-miR-637 | USF2    | USF2    | -      |
| hsa-miR-637 | USP36   | -       | USP36  |
| hsa-miR-637 | USP7    | USP7    | -      |
| hsa-miR-637 | USP9X   | USP9X   | -      |
| hsa-miR-637 | VAMP2   | VAMP2   | -      |
| hsa-miR-637 | VAPB    | VAPB    | -      |
| hsa-miR-637 | VARS    | VARS    | -      |
| hsa-miR-637 | VASN    | -       | VASN   |
| hsa-miR-637 | VAX2    | VAX2    | -      |
| hsa-miR-637 | VEGFA   | VEGFA   | -      |
| hsa-miR-637 | VPS37B  | VPS37B  | -      |
| hsa-miR-637 | VPS37C  | VPS37C  | -      |
| hsa-miR-637 | VPS37D  | VPS37D  | -      |
| hsa-miR-637 | VTI1A   | VTI1A   | -      |
| hsa-miR-637 | VTN     | VTN     | -      |
| hsa-miR-637 | VWA3B   | VWA3B   | -      |
| hsa-miR-637 | WASH1   | WASH1   | -      |
| hsa-miR-637 | WBP4    | WBP4    | -      |

|             |         |         |         |
|-------------|---------|---------|---------|
| hsa-miR-637 | WDFY4   | WDFY4   | -       |
| hsa-miR-637 | WDR20   | WDR20   | -       |
| hsa-miR-637 | WDR73   | WDR73   | -       |
| hsa-miR-637 | WDR86   | -       | WDR86   |
| hsa-miR-637 | WFIKKN2 | WFIKKN2 | -       |
| hsa-miR-637 | WHSC2   | -       | WHSC2   |
| hsa-miR-637 | WISP1   | WISP1   | -       |
| hsa-miR-637 | WIZ     | WIZ     | -       |
| hsa-miR-637 | WNT1    | WNT1    | -       |
| hsa-miR-637 | WNT7A   | WNT7A   | -       |
| hsa-miR-637 | WSCD1   | WSCD1   | -       |
| hsa-miR-637 | WSCD2   | WSCD2   | -       |
| hsa-miR-637 | WWP2    | WWP2    | -       |
| hsa-miR-637 | XBP1    | XBP1    | -       |
| hsa-miR-637 | XIRP1   | XIRP1   | -       |
| hsa-miR-637 | XKR4    | XKR4    | -       |
| hsa-miR-637 | XKR9    | XKR9    | -       |
| hsa-miR-637 | XPO7    | XPO7    | -       |
| hsa-miR-637 | XPR1    | XPR1    | -       |
| hsa-miR-637 | YIPF2   | YIPF2   | -       |
| hsa-miR-637 | -       | YPEL3   | YPEL3   |
| hsa-miR-637 | ZBTB32  | ZBTB32  | -       |
| hsa-miR-637 | ZBTB47  | ZBTB47  | -       |
| hsa-miR-637 | ZBTB7A  | ZBTB7A  | -       |
| hsa-miR-637 | ZBTB7C  | ZBTB7C  | -       |
| hsa-miR-637 | ZC3H3   | -       | ZC3H3   |
| hsa-miR-637 | ZC4H2   | ZC4H2   | -       |
| hsa-miR-637 | ZCCHC12 | ZCCHC12 | -       |
| hsa-miR-637 | ZDHHC19 | -       | ZDHHC19 |
| hsa-miR-637 | ZER1    | ZER1    | -       |
| hsa-miR-637 | ZFP3    | ZFP3    | -       |
| hsa-miR-637 | ZFP36L1 | ZFP36L1 | -       |
| hsa-miR-637 | ZFR2    | ZFR2    | -       |
| hsa-miR-637 | ZMAT4   | ZMAT4   | -       |
| hsa-miR-637 | ZMIZ1   | ZMIZ1   | -       |
| hsa-miR-637 | ZNF187  | ZNF187  | -       |
| hsa-miR-637 | ZNF192  | ZNF192  | -       |
| hsa-miR-637 | ZNF202  | ZNF202  | -       |
| hsa-miR-637 | ZNF251  | ZNF251  | -       |
| hsa-miR-637 | ZNF26   | ZNF26   | -       |
| hsa-miR-637 | ZNF260  | ZNF260  | -       |
| hsa-miR-637 | ZNF282  | ZNF282  | -       |
| hsa-miR-637 | ZNF346  | ZNF346  | -       |
| hsa-miR-637 | ZNF367  | ZNF367  | -       |
| hsa-miR-637 | ZNF395  | ZNF395  | -       |
| hsa-miR-637 | ZNF436  | ZNF436  | -       |
| hsa-miR-637 | ZNF440  | ZNF440  | -       |
| hsa-miR-637 | ZNF474  | ZNF474  | -       |
| hsa-miR-637 | ZNF496  | ZNF496  | -       |
| hsa-miR-637 | ZNF497  | ZNF497  | -       |
| hsa-miR-637 | ZNF500  | ZNF500  | -       |

|                |         |           |           |
|----------------|---------|-----------|-----------|
| hsa-miR-637    | ZNF513  | -         | ZNF513    |
| hsa-miR-637    | ZNF524  | ZNF524    | -         |
| hsa-miR-637    | ZNF526  | ZNF526    | -         |
| hsa-miR-637    | ZNF549  | ZNF549    | -         |
| hsa-miR-637    | ZNF585A | ZNF585A   | -         |
| hsa-miR-637    | ZNF621  | ZNF621    | -         |
| hsa-miR-637    | ZNF629  | -         | ZNF629    |
| hsa-miR-637    | ZNF646  | ZNF646    | -         |
| hsa-miR-637    | ZNF687  | ZNF687    | -         |
| hsa-miR-637    | ZNF704  | ZNF704    | -         |
| hsa-miR-637    | ZNF707  | ZNF707    | -         |
| hsa-miR-637    | ZNF710  | ZNF710    | -         |
| hsa-miR-637    | ZNF747  | ZNF747    | -         |
| hsa-miR-637    | ZNF75D  | ZNF75D    | -         |
| hsa-miR-637    | ZNF764  | ZNF764    | -         |
| hsa-miR-637    | ZNF783  | ZNF783    | -         |
| hsa-miR-637    | ZNF785  | ZNF785    | -         |
| hsa-miR-637    | ZNF81   | ZNF81     | -         |
| hsa-miR-637    | ZNF853  | ZNF853    | -         |
| hsa-miR-637    | ZNHIT1  | -         | ZNHIT1    |
| hsa-miR-637    | ZSWIM3  | ZSWIM3    | -         |
| hsa-miR-637    | ZYG11B  | ZYG11B    | -         |
| hsa-miR-654-3p | -       | ABCA10    | ABCA10    |
| hsa-miR-654-3p | -       | ADAMTS6   | ADAMTS6   |
| hsa-miR-654-3p | -       | AFG3L1    | AFG3L1    |
| hsa-miR-654-3p | -       | ALPL      | ALPL      |
| hsa-miR-654-3p | -       | AMELX     | AMELX     |
| hsa-miR-654-3p | -       | ANKRD10   | ANKRD10   |
| hsa-miR-654-3p | -       | ANKRD30A  | ANKRD30A  |
| hsa-miR-654-3p | -       | AOC2      | AOC2      |
| hsa-miR-654-3p | -       | ATP12A    | ATP12A    |
| hsa-miR-654-3p | -       | ATP2A2    | ATP2A2    |
| hsa-miR-654-3p | -       | BACE2     | BACE2     |
| hsa-miR-654-3p | -       | BAZ2B     | BAZ2B     |
| hsa-miR-654-3p | -       | BRAP      | BRAP      |
| hsa-miR-654-3p | -       | C10orf122 | C10orf122 |
| hsa-miR-654-3p | -       | C10orf93  | C10orf93  |
| hsa-miR-654-3p | -       | C12orf50  | C12orf50  |

|                |   |           |           |
|----------------|---|-----------|-----------|
| hsa-miR-654-3p | - | C12orf52  | C12orf52  |
| hsa-miR-654-3p | - | C12orf54  | C12orf54  |
| hsa-miR-654-3p | - | C12orf62  | C12orf62  |
| hsa-miR-654-3p | - | C14orf109 | C14orf109 |
| hsa-miR-654-3p | - | C14orf145 | C14orf145 |
| hsa-miR-654-3p | - | C17orf56  | C17orf56  |
| hsa-miR-654-3p | - | C19orf30  | C19orf30  |
| hsa-miR-654-3p | - | C19orf59  | C19orf59  |
| hsa-miR-654-3p | - | C1orf57   | C1orf57   |
| hsa-miR-654-3p | - | CAPN9     | CAPN9     |
| hsa-miR-654-3p | - | CCDC73    | CCDC73    |
| hsa-miR-654-3p | - | CCDC84    | CCDC84    |
| hsa-miR-654-3p | - | CCL18     | CCL18     |
| hsa-miR-654-3p | - | CCNC      | CCNC      |
| hsa-miR-654-3p | - | CD33      | CD33      |
| hsa-miR-654-3p | - | CD52      | CD52      |
| hsa-miR-654-3p | - | CDCA7     | CDCA7     |
| hsa-miR-654-3p | - | CDH10     | CDH10     |
| hsa-miR-654-3p | - | CDK10     | CDK10     |
| hsa-miR-654-3p | - | CDKN2A    | CDKN2A    |
| hsa-miR-654-3p | - | CGN       | CGN       |
| hsa-miR-654-3p | - | CHCHD6    | CHCHD6    |
| hsa-miR-654-3p | - | CHD7      | CHD7      |
| hsa-miR-654-3p | - | CHGB      | CHGB      |
| hsa-miR-654-3p | - | CHMP1A    | CHMP1A    |
| hsa-miR-654-3p | - | CHRNA10   | CHRNA10   |
| hsa-miR-654-3p | - | CKMT2     | CKMT2     |
| hsa-miR-654-3p | - | CLK4      | CLK4      |

|                |   |           |           |
|----------------|---|-----------|-----------|
| hsa-miR-654-3p | - | CLRN1     | CLRN1     |
| hsa-miR-654-3p | - | CNNM2     | CNNM2     |
| hsa-miR-654-3p | - | COLEC10   | COLEC10   |
| hsa-miR-654-3p | - | COLEC12   | COLEC12   |
| hsa-miR-654-3p | - | COPB2     | COPB2     |
| hsa-miR-654-3p | - | CRYBA1    | CRYBA1    |
| hsa-miR-654-3p | - | CSPP1     | CSPP1     |
| hsa-miR-654-3p | - | CXorf38   | CXorf38   |
| hsa-miR-654-3p | - | CYP4B1    | CYP4B1    |
| hsa-miR-654-3p | - | DOLK      | DOLK      |
| hsa-miR-654-3p | - | DULLARD   | DULLARD   |
| hsa-miR-654-3p | - | DYSF      | DYSF      |
| hsa-miR-654-3p | - | ECHDC1    | ECHDC1    |
| hsa-miR-654-3p | - | EFS       | EFS       |
| hsa-miR-654-3p | - | EIF1      | EIF1      |
| hsa-miR-654-3p | - | EIF4E1B   | EIF4E1B   |
| hsa-miR-654-3p | - | ENTPD1    | ENTPD1    |
| hsa-miR-654-3p | - | EPC1      | EPC1      |
| hsa-miR-654-3p | - | EVI5      | EVI5      |
| hsa-miR-654-3p | - | EXTL1     | EXTL1     |
| hsa-miR-654-3p | - | FAM114A1  | FAM114A1  |
| hsa-miR-654-3p | - | FAM120AOS | FAM120AOS |
| hsa-miR-654-3p | - | FAM127A   | FAM127A   |
| hsa-miR-654-3p | - | FAM19A4   | FAM19A4   |
| hsa-miR-654-3p | - | FGF14     | FGF14     |
| hsa-miR-654-3p | - | FKBP1A    | FKBP1A    |
| hsa-miR-654-3p | - | FKBP1B    | FKBP1B    |
| hsa-miR-654-3p | - | FPGT      | FPGT      |

|                |   |         |         |
|----------------|---|---------|---------|
| hsa-miR-654-3p | - | FXR1    | FXR1    |
| hsa-miR-654-3p | - | GABRB1  | GABRB1  |
| hsa-miR-654-3p | - | GEMIN5  | GEMIN5  |
| hsa-miR-654-3p | - | GEMIN8  | GEMIN8  |
| hsa-miR-654-3p | - | GLYATL2 | GLYATL2 |
| hsa-miR-654-3p | - | GPR107  | GPR107  |
| hsa-miR-654-3p | - | GPR77   | GPR77   |
| hsa-miR-654-3p | - | GPX5    | GPX5    |
| hsa-miR-654-3p | - | GRHL2   | GRHL2   |
| hsa-miR-654-3p | - | GTF2F2  | GTF2F2  |
| hsa-miR-654-3p | - | GYG1    | GYG1    |
| hsa-miR-654-3p | - | H2AFZ   | H2AFZ   |
| hsa-miR-654-3p | - | HADH    | HADH    |
| hsa-miR-654-3p | - | HAVCR1  | HAVCR1  |
| hsa-miR-654-3p | - | HGSNAT  | HGSNAT  |
| hsa-miR-654-3p | - | HOXB9   | HOXB9   |
| hsa-miR-654-3p | - | HPSE2   | HPSE2   |
| hsa-miR-654-3p | - | HTR3E   | HTR3E   |
| hsa-miR-654-3p | - | IBTK    | IBTK    |
| hsa-miR-654-3p | - | ID1     | ID1     |
| hsa-miR-654-3p | - | IDS     | IDS     |
| hsa-miR-654-3p | - | IFRD2   | IFRD2   |
| hsa-miR-654-3p | - | ILF2    | ILF2    |
| hsa-miR-654-3p | - | IMPG1   | IMPG1   |
| hsa-miR-654-3p | - | ITGA9   | ITGA9   |
| hsa-miR-654-3p | - | ITGAD   | ITGAD   |
| hsa-miR-654-3p | - | ITGBL1  | ITGBL1  |
| hsa-miR-654-3p | - | JAKMIP1 | JAKMIP1 |

|                |   |          |          |
|----------------|---|----------|----------|
| hsa-miR-654-3p | - | KATNA1   | KATNA1   |
| hsa-miR-654-3p | - | KCNE2    | KCNE2    |
| hsa-miR-654-3p | - | KCNIP4   | KCNIP4   |
| hsa-miR-654-3p | - | KCNMA1   | KCNMA1   |
| hsa-miR-654-3p | - | KIAA0317 | KIAA0317 |
| hsa-miR-654-3p | - | KIAA0831 | KIAA0831 |
| hsa-miR-654-3p | - | KIAA1217 | KIAA1217 |
| hsa-miR-654-3p | - | KLHL26   | KLHL26   |
| hsa-miR-654-3p | - | L1CAM    | L1CAM    |
| hsa-miR-654-3p | - | LACE1    | LACE1    |
| hsa-miR-654-3p | - | LAMC3    | LAMC3    |
| hsa-miR-654-3p | - | LCE5A    | LCE5A    |
| hsa-miR-654-3p | - | LETMD1   | LETMD1   |
| hsa-miR-654-3p | - | LRCH3    | LRCH3    |
| hsa-miR-654-3p | - | LRP5L    | LRP5L    |
| hsa-miR-654-3p | - | LRP8     | LRP8     |
| hsa-miR-654-3p | - | LY86     | LY86     |
| hsa-miR-654-3p | - | MAP7D1   | MAP7D1   |
| hsa-miR-654-3p | - | MAPK6    | MAPK6    |
| hsa-miR-654-3p | - | MARVELD2 | MARVELD2 |
| hsa-miR-654-3p | - | MBOAT1   | MBOAT1   |
| hsa-miR-654-3p | - | MGST1    | MGST1    |
| hsa-miR-654-3p | - | MLANA    | MLANA    |
| hsa-miR-654-3p | - | MRPL20   | MRPL20   |
| hsa-miR-654-3p | - | MRPL44   | MRPL44   |
| hsa-miR-654-3p | - | MST1     | MST1     |
| hsa-miR-654-3p | - | MT1B     | MT1B     |
| hsa-miR-654-3p | - | MXRA5    | MXRA5    |

|                |   |         |         |
|----------------|---|---------|---------|
| hsa-miR-654-3p | - | NAALAD2 | NAALAD2 |
| hsa-miR-654-3p | - | NAGLU   | NAGLU   |
| hsa-miR-654-3p | - | NBPF14  | NBPF14  |
| hsa-miR-654-3p | - | NCAPG2  | NCAPG2  |
| hsa-miR-654-3p | - | NEK5    | NEK5    |
| hsa-miR-654-3p | - | NIPBL   | NIPBL   |
| hsa-miR-654-3p | - | NOTCH4  | NOTCH4  |
| hsa-miR-654-3p | - | NPM1    | NPM1    |
| hsa-miR-654-3p | - | NR2E3   | NR2E3   |
| hsa-miR-654-3p | - | NXPH1   | NXPH1   |
| hsa-miR-654-3p | - | ODAM    | ODAM    |
| hsa-miR-654-3p | - | OR4C6   | OR4C6   |
| hsa-miR-654-3p | - | P2RX4   | P2RX4   |
| hsa-miR-654-3p | - | PCDH15  | PCDH15  |
| hsa-miR-654-3p | - | PDGFRL  | PDGFRL  |
| hsa-miR-654-3p | - | PDZD3   | PDZD3   |
| hsa-miR-654-3p | - | PEX11A  | PEX11A  |
| hsa-miR-654-3p | - | PGBD1   | PGBD1   |
| hsa-miR-654-3p | - | PHLDB3  | PHLDB3  |
| hsa-miR-654-3p | - | PIGH    | PIGH    |
| hsa-miR-654-3p | - | PINK1   | PINK1   |
| hsa-miR-654-3p | - | PKD1L1  | PKD1L1  |
| hsa-miR-654-3p | - | PLEKHG4 | PLEKHG4 |
| hsa-miR-654-3p | - | PLK4    | PLK4    |
| hsa-miR-654-3p | - | PLL     | PLL     |
| hsa-miR-654-3p | - | PNN     | PNN     |
| hsa-miR-654-3p | - | PNPO    | PNPO    |
| hsa-miR-654-3p | - | POP5    | POP5    |



|                |   |          |          |
|----------------|---|----------|----------|
| hsa-miR-654-3p | - | PPM1A    | PPM1A    |
| hsa-miR-654-3p | - | PPM1L    | PPM1L    |
| hsa-miR-654-3p | - | PPP2R5D  | PPP2R5D  |
| hsa-miR-654-3p | - | PRAME    | PRAME    |
| hsa-miR-654-3p | - | PTCHD1   | PTCHD1   |
| hsa-miR-654-3p | - | PTGER3   | PTGER3   |
| hsa-miR-654-3p | - | PTPN13   | PTPN13   |
| hsa-miR-654-3p | - | PTPRB    | PTPRB    |
| hsa-miR-654-3p | - | QRICH1   | QRICH1   |
| hsa-miR-654-3p | - | RAB37    | RAB37    |
| hsa-miR-654-3p | - | RAF1     | RAF1     |
| hsa-miR-654-3p | - | RASL11B  | RASL11B  |
| hsa-miR-654-3p | - | RCOR2    | RCOR2    |
| hsa-miR-654-3p | - | REEP1    | REEP1    |
| hsa-miR-654-3p | - | RETSAT   | RETSAT   |
| hsa-miR-654-3p | - | RGS12    | RGS12    |
| hsa-miR-654-3p | - | RIC3     | RIC3     |
| hsa-miR-654-3p | - | RIMS2    | RIMS2    |
| hsa-miR-654-3p | - | RNASEH2A | RNASEH2A |
| hsa-miR-654-3p | - | RNPEPL1  | RNPEPL1  |
| hsa-miR-654-3p | - | RPL5     | RPL5     |
| hsa-miR-654-3p | - | RPS3     | RPS3     |
| hsa-miR-654-3p | - | RRH      | RRH      |
| hsa-miR-654-3p | - | S100G    | S100G    |
| hsa-miR-654-3p | - | SACM1L   | SACM1L   |
| hsa-miR-654-3p | - | SCARF1   | SCARF1   |
| hsa-miR-654-3p | - | SCGB1C1  | SCGB1C1  |
| hsa-miR-654-3p | - | SDF2     | SDF2     |

|                |   |          |          |
|----------------|---|----------|----------|
| hsa-miR-654-3p | - | SEC61A1  | SEC61A1  |
| hsa-miR-654-3p | - | SET      | SET      |
| hsa-miR-654-3p | - | SGTA     | SGTA     |
| hsa-miR-654-3p | - | SLC2A11  | SLC2A11  |
| hsa-miR-654-3p | - | SLC35D2  | SLC35D2  |
| hsa-miR-654-3p | - | SLC35F2  | SLC35F2  |
| hsa-miR-654-3p | - | SLC39A2  | SLC39A2  |
| hsa-miR-654-3p | - | SLC41A2  | SLC41A2  |
| hsa-miR-654-3p | - | SMR3B    | SMR3B    |
| hsa-miR-654-3p | - | SMYD3    | SMYD3    |
| hsa-miR-654-3p | - | SNRPA    | SNRPA    |
| hsa-miR-654-3p | - | SPIN2A   | SPIN2A   |
| hsa-miR-654-3p | - | SPIN3    | SPIN3    |
| hsa-miR-654-3p | - | ST6GAL2  | ST6GAL2  |
| hsa-miR-654-3p | - | STARD3NL | STARD3NL |
| hsa-miR-654-3p | - | SUGT1    | SUGT1    |
| hsa-miR-654-3p | - | SULT1E1  | SULT1E1  |
| hsa-miR-654-3p | - | TACSTD2  | TACSTD2  |
| hsa-miR-654-3p | - | TAF5     | TAF5     |
| hsa-miR-654-3p | - | TAF6     | TAF6     |
| hsa-miR-654-3p | - | TANK     | TANK     |
| hsa-miR-654-3p | - | TCEAL4   | TCEAL4   |
| hsa-miR-654-3p | - | TCP10L   | TCP10L   |
| hsa-miR-654-3p | - | TEX14    | TEX14    |
| hsa-miR-654-3p | - | THAP8    | THAP8    |
| hsa-miR-654-3p | - | TLR2     | TLR2     |
| hsa-miR-654-3p | - | TMEM138  | TMEM138  |
| hsa-miR-654-3p | - | TMEM147  | TMEM147  |

|                |   |         |         |
|----------------|---|---------|---------|
| hsa-miR-654-3p | - | TMEM177 | TMEM177 |
| hsa-miR-654-3p | - | TMEM187 | TMEM187 |
| hsa-miR-654-3p | - | TMEM59  | TMEM59  |
| hsa-miR-654-3p | - | TNF     | TNF     |
| hsa-miR-654-3p | - | TNFAIP8 | TNFAIP8 |
| hsa-miR-654-3p | - | TNFRSF9 | TNFRSF9 |
| hsa-miR-654-3p | - | TOE1    | TOE1    |
| hsa-miR-654-3p | - | TRDN    | TRDN    |
| hsa-miR-654-3p | - | TRIM3   | TRIM3   |
| hsa-miR-654-3p | - | TRIM49  | TRIM49  |
| hsa-miR-654-3p | - | TRNT1   | TRNT1   |
| hsa-miR-654-3p | - | TSC2    | TSC2    |
| hsa-miR-654-3p | - | TSPAN8  | TSPAN8  |
| hsa-miR-654-3p | - | TTC1    | TTC1    |
| hsa-miR-654-3p | - | TTLL11  | TTLL11  |
| hsa-miR-654-3p | - | TXNRD1  | TXNRD1  |
| hsa-miR-654-3p | - | UBTD1   | UBTD1   |
| hsa-miR-654-3p | - | UCN2    | UCN2    |
| hsa-miR-654-3p | - | USF1    | USF1    |
| hsa-miR-654-3p | - | VRK2    | VRK2    |
| hsa-miR-654-3p | - | WDFY2   | WDFY2   |
| hsa-miR-654-3p | - | WDSUB1  | WDSUB1  |
| hsa-miR-654-3p | - | WEE1    | WEE1    |
| hsa-miR-654-3p | - | YSK4    | YSK4    |
| hsa-miR-654-3p | - | ZBP1    | ZBP1    |
| hsa-miR-654-3p | - | ZCCHC10 | ZCCHC10 |
| hsa-miR-654-3p | - | ZCCHC6  | ZCCHC6  |
| hsa-miR-654-3p | - | ZDHHC13 | ZDHHC13 |

|                |          |          |        |
|----------------|----------|----------|--------|
| hsa-miR-654-3p | -        | ZNF100   | ZNF100 |
| hsa-miR-654-3p | -        | ZNF215   | ZNF215 |
| hsa-miR-654-3p | -        | ZNF232   | ZNF232 |
| hsa-miR-654-3p | -        | ZNF256   | ZNF256 |
| hsa-miR-654-3p | -        | ZNF271   | ZNF271 |
| hsa-miR-654-3p | -        | ZNF418   | ZNF418 |
| hsa-miR-654-3p | -        | ZNF430   | ZNF430 |
| hsa-miR-654-3p | -        | ZNF569   | ZNF569 |
| hsa-miR-654-3p | -        | ZNF638   | ZNF638 |
| hsa-miR-654-3p | -        | ZNF714   | ZNF714 |
| hsa-miR-654-3p | -        | ZWINT    | ZWINT  |
| hsa-miR-655    | AASS     | AASS     | -      |
| hsa-miR-655    | ABCA1    | ABCA1    | -      |
| hsa-miR-655    | ABCA5    | ABCA5    | -      |
| hsa-miR-655    | ABCC5    | ABCC5    | -      |
| hsa-miR-655    | ABCC6    | ABCC6    | -      |
| hsa-miR-655    | ABCC9    | ABCC9    | -      |
| hsa-miR-655    | ABCD2    | ABCD2    | -      |
| hsa-miR-655    | ABCD3    | ABCD3    | -      |
| hsa-miR-655    | ABCE1    | ABCE1    | -      |
| hsa-miR-655    | ABCG2    | ABCG2    | -      |
| hsa-miR-655    | ABHD13   | ABHD13   | -      |
| hsa-miR-655    | ABI2     | ABI2     | -      |
| hsa-miR-655    | ABT1     | ABT1     | -      |
| hsa-miR-655    | ACE2     | ACE2     | -      |
| hsa-miR-655    | ACER3    | ACER3    | -      |
| hsa-miR-655    | ACLY     | ACLY     | -      |
| hsa-miR-655    | ACO1     | ACO1     | -      |
| hsa-miR-655    | ACSL1    | ACSL1    | -      |
| hsa-miR-655    | ACSL3    | ACSL3    | -      |
| hsa-miR-655    | ACSL4    | ACSL4    | -      |
| hsa-miR-655    | ACSS3    | ACSS3    | -      |
| hsa-miR-655    | ACTC1    | ACTC1    | -      |
| hsa-miR-655    | ACTG1    | ACTG1    | -      |
| hsa-miR-655    | ACTN1    | ACTN1    | -      |
| hsa-miR-655    | ADAM12   | ADAM12   | -      |
| hsa-miR-655    | ADAM18   | ADAM18   | -      |
| hsa-miR-655    | ADAMTS19 | ADAMTS19 | -      |
| hsa-miR-655    | ADAMTS6  | ADAMTS6  | -      |
| hsa-miR-655    | ADARB1   | ADARB1   | -      |
| hsa-miR-655    | ADCY9    | ADCY9    | -      |
| hsa-miR-655    | ADD1     | ADD1     | -      |

|             |          |          |   |
|-------------|----------|----------|---|
| hsa-miR-655 | ADD3     | ADD3     | - |
| hsa-miR-655 | ADH5     | ADH5     | - |
| hsa-miR-655 | ADNP     | ADNP     | - |
| hsa-miR-655 | ADO      | ADO      | - |
| hsa-miR-655 | ADRB3    | ADRB3    | - |
| hsa-miR-655 | AEBP2    | AEBP2    | - |
| hsa-miR-655 | AFAP1L2  | AFAP1L2  | - |
| hsa-miR-655 | AFF3     | AFF3     | - |
| hsa-miR-655 | AFF4     | AFF4     | - |
| hsa-miR-655 | AGA      | AGA      | - |
| hsa-miR-655 | AGAP11   | AGAP11   | - |
| hsa-miR-655 | AGAP4    | AGAP4    | - |
| hsa-miR-655 | AGAP5    | AGAP5    | - |
| hsa-miR-655 | AGAP6    | AGAP6    | - |
| hsa-miR-655 | AGAP7    | AGAP7    | - |
| hsa-miR-655 | AGAP8    | AGAP8    | - |
| hsa-miR-655 | AGBL2    | AGBL2    | - |
| hsa-miR-655 | AGFG1    | AGFG1    | - |
| hsa-miR-655 | AGGF1    | AGGF1    | - |
| hsa-miR-655 | AGK      | AGK      | - |
| hsa-miR-655 | AGL      | AGL      | - |
| hsa-miR-655 | AGPAT3   | AGPAT3   | - |
| hsa-miR-655 | AGPAT5   | AGPAT5   | - |
| hsa-miR-655 | AGPS     | AGPS     | - |
| hsa-miR-655 | AHCYL2   | AHCYL2   | - |
| hsa-miR-655 | AHDC1    | AHDC1    | - |
| hsa-miR-655 | AHR      | AHR      | - |
| hsa-miR-655 | AHRR     | AHRR     | - |
| hsa-miR-655 | AIDA     | AIDA     | - |
| hsa-miR-655 | AIMP2    | AIMP2    | - |
| hsa-miR-655 | AKAP2    | AKAP2    | - |
| hsa-miR-655 | AKAP6    | AKAP6    | - |
| hsa-miR-655 | AKD1     | AKD1     | - |
| hsa-miR-655 | AKIRIN1  | AKIRIN1  | - |
| hsa-miR-655 | AKIRIN2  | AKIRIN2  | - |
| hsa-miR-655 | ALDH1A1  | ALDH1A1  | - |
| hsa-miR-655 | ALDH1A2  | ALDH1A2  | - |
| hsa-miR-655 | ALDH3A2  | ALDH3A2  | - |
| hsa-miR-655 | ALG10    | ALG10    | - |
| hsa-miR-655 | ALG6     | ALG6     | - |
| hsa-miR-655 | ALKBH8   | ALKBH8   | - |
| hsa-miR-655 | ALPK1    | ALPK1    | - |
| hsa-miR-655 | ALS2CR8  | ALS2CR8  | - |
| hsa-miR-655 | AMIGO2   | AMIGO2   | - |
| hsa-miR-655 | AMMECR1L | AMMECR1L | - |
| hsa-miR-655 | ANGPT1   | ANGPT1   | - |
| hsa-miR-655 | ANGPTL1  | ANGPTL1  | - |
| hsa-miR-655 | ANGPTL2  | ANGPTL2  | - |
| hsa-miR-655 | ANGPTL3  | ANGPTL3  | - |
| hsa-miR-655 | ANK2     | ANK2     | - |
| hsa-miR-655 | ANKIB1   | ANKIB1   | - |

|             |          |          |       |
|-------------|----------|----------|-------|
| hsa-miR-655 | ANKRD12  | ANKRD12  | -     |
| hsa-miR-655 | ANKRD26  | ANKRD26  | -     |
| hsa-miR-655 | ANKRD28  | ANKRD28  | -     |
| hsa-miR-655 | ANKRD34B | ANKRD34B | -     |
| hsa-miR-655 | ANKRD36B | ANKRD36B | -     |
| hsa-miR-655 | ANKRD5   | ANKRD5   | -     |
| hsa-miR-655 | ANKS1B   | ANKS1B   | -     |
| hsa-miR-655 | ANO1     | ANO1     | -     |
| hsa-miR-655 | ANO3     | ANO3     | -     |
| hsa-miR-655 | ANO6     | ANO6     | -     |
| hsa-miR-655 | ANP32E   | ANP32E   | -     |
| hsa-miR-655 | ANTXR2   | ANTXR2   | -     |
| hsa-miR-655 | ANXA3    | ANXA3    | -     |
| hsa-miR-655 | -        | ANXA7    | ANXA7 |
| hsa-miR-655 | AOC3     | AOC3     | -     |
| hsa-miR-655 | AP1S3    | AP1S3    | -     |
| hsa-miR-655 | AP3M1    | AP3M1    | -     |
| hsa-miR-655 | APAF1    | APAF1    | -     |
| hsa-miR-655 | APBB2    | APBB2    | -     |
| hsa-miR-655 | APC      | APC      | -     |
| hsa-miR-655 | APOBEC3A | APOBEC3A | -     |
| hsa-miR-655 | APP      | APP      | -     |
| hsa-miR-655 | APPL1    | APPL1    | -     |
| hsa-miR-655 | ARAP2    | ARAP2    | -     |
| hsa-miR-655 | ARFGEF1  | ARFGEF1  | -     |
| hsa-miR-655 | ARFGEF2  | ARFGEF2  | -     |
| hsa-miR-655 | ARHGAP32 | ARHGAP32 | -     |
| hsa-miR-655 | ARHGAP5  | ARHGAP5  | -     |
| hsa-miR-655 | ARHGAP6  | ARHGAP6  | -     |
| hsa-miR-655 | ARHGEF10 | ARHGEF10 | -     |
| hsa-miR-655 | ARHGEF17 | ARHGEF17 | -     |
| hsa-miR-655 | ARHGEF3  | ARHGEF3  | -     |
| hsa-miR-655 | ARHGEF7  | ARHGEF7  | -     |
| hsa-miR-655 | ARHGEF9  | ARHGEF9  | -     |
| hsa-miR-655 | ARID2    | ARID2    | -     |
| hsa-miR-655 | ARID4A   | ARID4A   | -     |
| hsa-miR-655 | ARID4B   | ARID4B   | -     |
| hsa-miR-655 | ARID5B   | ARID5B   | -     |
| hsa-miR-655 | ARIH1    | ARIH1    | -     |
| hsa-miR-655 | ARL10    | ARL10    | -     |
| hsa-miR-655 | ARL2BP   | ARL2BP   | -     |
| hsa-miR-655 | ARL3     | ARL3     | -     |
| hsa-miR-655 | ARL4D    | ARL4D    | -     |
| hsa-miR-655 | ARL5A    | ARL5A    | -     |
| hsa-miR-655 | ARL6IP1  | ARL6IP1  | -     |
| hsa-miR-655 | ARL6IP5  | ARL6IP5  | -     |
| hsa-miR-655 | ARMC5    | ARMC5    | -     |
| hsa-miR-655 | ARPC5    | ARPC5    | -     |
| hsa-miR-655 | ARPP19   | ARPP19   | -     |
| hsa-miR-655 | ARPP21   | ARPP21   | -     |
| hsa-miR-655 | ARSB     | ARSB     | -     |

|             |          |          |         |
|-------------|----------|----------|---------|
| hsa-miR-655 | ARSD     | ARSD     | -       |
| hsa-miR-655 | ARSK     | ARSK     | -       |
| hsa-miR-655 | ASAP2    | ASAP2    | -       |
| hsa-miR-655 | ASB2     | ASB2     | -       |
| hsa-miR-655 | ASB5     | ASB5     | -       |
| hsa-miR-655 | ASB9     | ASB9     | -       |
| hsa-miR-655 | ASCC1    | ASCC1    | -       |
| hsa-miR-655 | ASCC3    | ASCC3    | -       |
| hsa-miR-655 | ASH1L    | ASH1L    | -       |
| hsa-miR-655 | ASPHD2   | ASPHD2   | -       |
| hsa-miR-655 | ASXL2    | ASXL2    | -       |
| hsa-miR-655 | ATAD2    | ATAD2    | -       |
| hsa-miR-655 | ATAD5    | ATAD5    | -       |
| hsa-miR-655 | ATF7IP2  | ATF7IP2  | -       |
| hsa-miR-655 | ATG12    | ATG12    | -       |
| hsa-miR-655 | ATG2A    | ATG2A    | -       |
| hsa-miR-655 | ATL2     | ATL2     | -       |
| hsa-miR-655 | ATM      | ATM      | -       |
| hsa-miR-655 | ATMIN    | ATMIN    | -       |
| hsa-miR-655 | ATP11B   | ATP11B   | -       |
| hsa-miR-655 | ATP11C   | ATP11C   | -       |
| hsa-miR-655 | ATP13A3  | ATP13A3  | -       |
| hsa-miR-655 | -        | ATP1A2   | ATP1A2  |
| hsa-miR-655 | ATP2A2   | ATP2A2   | -       |
| hsa-miR-655 | ATP2B1   | ATP2B1   | -       |
| hsa-miR-655 | ATP2B4   | ATP2B4   | -       |
| hsa-miR-655 | ATP2C1   | ATP2C1   | -       |
| hsa-miR-655 | ATP5G2   | ATP5G2   | -       |
| hsa-miR-655 | ATP6V1C1 | ATP6V1C1 | -       |
| hsa-miR-655 | ATP6V1D  | ATP6V1D  | -       |
| hsa-miR-655 | ATP6V1G1 | ATP6V1G1 | -       |
| hsa-miR-655 | -        | ATP6V1H  | ATP6V1H |
| hsa-miR-655 | ATP8A1   | ATP8A1   | -       |
| hsa-miR-655 | ATP8B1   | ATP8B1   | -       |
| hsa-miR-655 | ATP8B2   | ATP8B2   | -       |
| hsa-miR-655 | ATPBD4   | ATPBD4   | -       |
| hsa-miR-655 | ATRNL1   | ATRNL1   | -       |
| hsa-miR-655 | ATRX     | ATRX     | -       |
| hsa-miR-655 | ATXN1L   | ATXN1L   | -       |
| hsa-miR-655 | ATXN3    | ATXN3    | -       |
| hsa-miR-655 | ATXN7L1  | ATXN7L1  | -       |
| hsa-miR-655 | ATXN7L3B | ATXN7L3B | -       |
| hsa-miR-655 | AXIN2    | AXIN2    | -       |
| hsa-miR-655 | AZI2     | AZI2     | -       |
| hsa-miR-655 | B3GALNT2 | B3GALNT2 | -       |
| hsa-miR-655 | B3GALTL  | B3GALTL  | -       |
| hsa-miR-655 | B3GNT1   | B3GNT1   | -       |
| hsa-miR-655 | B3GNT5   | B3GNT5   | -       |
| hsa-miR-655 | B4GALNT2 | B4GALNT2 | -       |
| hsa-miR-655 | B4GALT5  | B4GALT5  | -       |
| hsa-miR-655 | B4GALT6  | B4GALT6  | -       |

|             |           |           |       |
|-------------|-----------|-----------|-------|
| hsa-miR-655 | BAAT      | BAAT      | -     |
| hsa-miR-655 | BACE1     | BACE1     | -     |
| hsa-miR-655 | BACE2     | BACE2     | -     |
| hsa-miR-655 | BAGE      | BAGE      | -     |
| hsa-miR-655 | -         | BAMBI     | BAMBI |
| hsa-miR-655 | BANK1     | BANK1     | -     |
| hsa-miR-655 | BAZ1A     | BAZ1A     | -     |
| hsa-miR-655 | BBS7      | BBS7      | -     |
| hsa-miR-655 | BCAP29    | BCAP29    | -     |
| hsa-miR-655 | BCAS1     | BCAS1     | -     |
| hsa-miR-655 | BCL10     | BCL10     | -     |
| hsa-miR-655 | BCL2      | BCL2      | -     |
| hsa-miR-655 | BCL2L11   | BCL2L11   | -     |
| hsa-miR-655 | BCL2L2    | BCL2L2    | -     |
| hsa-miR-655 | BCL6      | BCL6      | -     |
| hsa-miR-655 | BCL9      | BCL9      | -     |
| hsa-miR-655 | BDP1      | BDP1      | -     |
| hsa-miR-655 | BEND2     | BEND2     | -     |
| hsa-miR-655 | BET1L     | BET1L     | -     |
| hsa-miR-655 | BHLHB9    | BHLHB9    | -     |
| hsa-miR-655 | BHLHE22   | BHLHE22   | -     |
| hsa-miR-655 | BHLHE40   | BHLHE40   | -     |
| hsa-miR-655 | BICD2     | BICD2     | -     |
| hsa-miR-655 | BIRC6     | BIRC6     | -     |
| hsa-miR-655 | BMP3      | BMP3      | -     |
| hsa-miR-655 | BMP4      | BMP4      | -     |
| hsa-miR-655 | BMP5      | BMP5      | -     |
| hsa-miR-655 | BMPER     | BMPER     | -     |
| hsa-miR-655 | BMPR2     | BMPR2     | -     |
| hsa-miR-655 | BMS1      | BMS1      | -     |
| hsa-miR-655 | BNIP2     | BNIP2     | -     |
| hsa-miR-655 | BPTF      | BPTF      | -     |
| hsa-miR-655 | BRD3      | BRD3      | -     |
| hsa-miR-655 | BRWD1     | BRWD1     | -     |
| hsa-miR-655 | BTAF1     | BTAF1     | -     |
| hsa-miR-655 | BTBD11    | BTBD11    | -     |
| hsa-miR-655 | BTBD3     | BTBD3     | -     |
| hsa-miR-655 | BTG1      | BTG1      | -     |
| hsa-miR-655 | BTLA      | BTLA      | -     |
| hsa-miR-655 | BTN2A2    | BTN2A2    | -     |
| hsa-miR-655 | -         | BUB1B     | BUB1B |
| hsa-miR-655 | BVES      | BVES      | -     |
| hsa-miR-655 | C10orf137 | C10orf137 | -     |
| hsa-miR-655 | C10orf32  | C10orf32  | -     |
| hsa-miR-655 | C10orf46  | C10orf46  | -     |
| hsa-miR-655 | C10orf57  | C10orf57  | -     |
| hsa-miR-655 | C10orf81  | C10orf81  | -     |
| hsa-miR-655 | C11orf41  | C11orf41  | -     |
| hsa-miR-655 | C11orf82  | C11orf82  | -     |
| hsa-miR-655 | C11orf87  | C11orf87  | -     |
| hsa-miR-655 | C12orf12  | C12orf12  | -     |



|             |           |           |          |
|-------------|-----------|-----------|----------|
| hsa-miR-655 | C12orf23  | C12orf23  | -        |
| hsa-miR-655 | -         | C12orf24  | C12orf24 |
| hsa-miR-655 | C12orf53  | C12orf53  | -        |
| hsa-miR-655 | C13orf33  | C13orf33  | -        |
| hsa-miR-655 | C13orf36  | C13orf36  | -        |
| hsa-miR-655 | C14orf126 | C14orf126 | -        |
| hsa-miR-655 | C14orf129 | C14orf129 | -        |
| hsa-miR-655 | C15orf33  | C15orf33  | -        |
| hsa-miR-655 | C15orf54  | C15orf54  | -        |
| hsa-miR-655 | C16orf70  | C16orf70  | -        |
| hsa-miR-655 | C16orf72  | C16orf72  | -        |
| hsa-miR-655 | C17orf102 | C17orf102 | -        |
| hsa-miR-655 | C17orf104 | C17orf104 | -        |
| hsa-miR-655 | C17orf67  | C17orf67  | -        |
| hsa-miR-655 | C17orf75  | C17orf75  | -        |
| hsa-miR-655 | C17orf80  | C17orf80  | -        |
| hsa-miR-655 | -         | C17orf86  | C17orf86 |
| hsa-miR-655 | C18orf25  | C18orf25  | -        |
| hsa-miR-655 | C18orf32  | C18orf32  | -        |
| hsa-miR-655 | C18orf45  | C18orf45  | -        |
| hsa-miR-655 | C1QTNF7   | C1QTNF7   | -        |
| hsa-miR-655 | -         | C1orf103  | C1orf103 |
| hsa-miR-655 | C1orf109  | C1orf109  | -        |
| hsa-miR-655 | C1orf124  | C1orf124  | -        |
| hsa-miR-655 | C1orf141  | C1orf141  | -        |
| hsa-miR-655 | C1orf168  | C1orf168  | -        |
| hsa-miR-655 | C1orf173  | C1orf173  | -        |
| hsa-miR-655 | C1orf174  | C1orf174  | -        |
| hsa-miR-655 | C1orf198  | C1orf198  | -        |
| hsa-miR-655 | C1orf212  | C1orf212  | -        |
| hsa-miR-655 | C1orf216  | C1orf216  | -        |
| hsa-miR-655 | -         | C1orf88   | C1orf88  |
| hsa-miR-655 | C1orf96   | C1orf96   | -        |
| hsa-miR-655 | -         | C20orf20  | C20orf20 |
| hsa-miR-655 | C20orf7   | C20orf7   | -        |
| hsa-miR-655 | C21orf7   | C21orf7   | -        |
| hsa-miR-655 | C21orf91  | C21orf91  | -        |
| hsa-miR-655 | C22orf32  | C22orf32  | -        |
| hsa-miR-655 | C22orf40  | C22orf40  | -        |
| hsa-miR-655 | C2orf18   | C2orf18   | -        |
| hsa-miR-655 | C2orf3    | C2orf3    | -        |
| hsa-miR-655 | C2orf67   | C2orf67   | -        |
| hsa-miR-655 | C2orf69   | C2orf69   | -        |
| hsa-miR-655 | C2orf77   | C2orf77   | -        |
| hsa-miR-655 | C2orf88   | C2orf88   | -        |
| hsa-miR-655 | -         | C3orf1    | C3orf1   |
| hsa-miR-655 | -         | C3orf14   | C3orf14  |
| hsa-miR-655 | C3orf23   | C3orf23   | -        |
| hsa-miR-655 | -         | C3orf37   | C3orf37  |
| hsa-miR-655 | C3orf43   | C3orf43   | -        |
| hsa-miR-655 | C3orf67   | C3orf67   | -        |

|             |           |           |          |
|-------------|-----------|-----------|----------|
| hsa-miR-655 | C3orf72   | C3orf72   | -        |
| hsa-miR-655 | C3orf79   | C3orf79   | -        |
| hsa-miR-655 | C4orf39   | C4orf39   | -        |
| hsa-miR-655 | C4orf40   | C4orf40   | -        |
| hsa-miR-655 | C4orf46   | C4orf46   | -        |
| hsa-miR-655 | C5orf13   | C5orf13   | -        |
| hsa-miR-655 | C5orf24   | C5orf24   | -        |
| hsa-miR-655 | C5orf30   | C5orf30   | -        |
| hsa-miR-655 | C5orf41   | C5orf41   | -        |
| hsa-miR-655 | C5orf42   | C5orf42   | -        |
| hsa-miR-655 | C5orf51   | C5orf51   | -        |
| hsa-miR-655 | C6orf136  | C6orf136  | -        |
| hsa-miR-655 | C6orf162  | C6orf162  | -        |
| hsa-miR-655 | C6orf35   | C6orf35   | -        |
| hsa-miR-655 | -         | C6orf48   | C6orf48  |
| hsa-miR-655 | C6orf89   | C6orf89   | -        |
| hsa-miR-655 | -         | C7orf27   | C7orf27  |
| hsa-miR-655 | C7orf41   | C7orf41   | -        |
| hsa-miR-655 | C7orf45   | C7orf45   | -        |
| hsa-miR-655 | C7orf57   | C7orf57   | -        |
| hsa-miR-655 | C7orf58   | C7orf58   | -        |
| hsa-miR-655 | C8orf22   | C8orf22   | -        |
| hsa-miR-655 | C8orf37   | C8orf37   | -        |
| hsa-miR-655 | C8orf83   | C8orf83   | -        |
| hsa-miR-655 | C8orf85   | C8orf85   | -        |
| hsa-miR-655 | C9orf123  | C9orf123  | -        |
| hsa-miR-655 | C9orf150  | C9orf150  | -        |
| hsa-miR-655 | -         | C9orf153  | C9orf153 |
| hsa-miR-655 | C9orf71   | C9orf71   | -        |
| hsa-miR-655 | C9orf72   | C9orf72   | -        |
| hsa-miR-655 | C9orf85   | C9orf85   | -        |
| hsa-miR-655 | -         | C9orf93   | C9orf93  |
| hsa-miR-655 | CA13      | CA13      | -        |
| hsa-miR-655 | CA5B      | CA5B      | -        |
| hsa-miR-655 | CACNA1C   | CACNA1C   | -        |
| hsa-miR-655 | CACNB2    | CACNB2    | -        |
| hsa-miR-655 | CACNB4    | CACNB4    | -        |
| hsa-miR-655 | CADM2     | CADM2     | -        |
| hsa-miR-655 | CADPS2    | CADPS2    | -        |
| hsa-miR-655 | CALM1     | CALM1     | -        |
| hsa-miR-655 | CALM2     | CALM2     | -        |
| hsa-miR-655 | CAMSAP1L1 | CAMSAP1L1 | -        |
| hsa-miR-655 | CAMTA1    | CAMTA1    | -        |
| hsa-miR-655 | CAND1     | CAND1     | -        |
| hsa-miR-655 | CANX      | CANX      | -        |
| hsa-miR-655 | CAPZA1    | CAPZA1    | -        |
| hsa-miR-655 | CAPZA2    | CAPZA2    | -        |
| hsa-miR-655 | CARD9     | CARD9     | -        |
| hsa-miR-655 | CASC4     | CASC4     | -        |
| hsa-miR-655 | CASD1     | CASD1     | -        |
| hsa-miR-655 | CASKIN1   | CASKIN1   | -        |

|             |          |          |      |
|-------------|----------|----------|------|
| hsa-miR-655 | CASP6    | CASP6    | -    |
| hsa-miR-655 | CBFB     | CBFB     | -    |
| hsa-miR-655 | CBR4     | CBR4     | -    |
| hsa-miR-655 | CBX1     | CBX1     | -    |
| hsa-miR-655 | CCDC102B | CCDC102B | -    |
| hsa-miR-655 | CCDC112  | CCDC112  | -    |
| hsa-miR-655 | CCDC117  | CCDC117  | -    |
| hsa-miR-655 | CCDC122  | CCDC122  | -    |
| hsa-miR-655 | CCDC127  | CCDC127  | -    |
| hsa-miR-655 | CCDC140  | CCDC140  | -    |
| hsa-miR-655 | CCDC144A | CCDC144A | -    |
| hsa-miR-655 | CCDC149  | CCDC149  | -    |
| hsa-miR-655 | CCDC152  | CCDC152  | -    |
| hsa-miR-655 | CCDC34   | CCDC34   | -    |
| hsa-miR-655 | CCDC39   | CCDC39   | -    |
| hsa-miR-655 | CCDC50   | CCDC50   | -    |
| hsa-miR-655 | CCDC68   | CCDC68   | -    |
| hsa-miR-655 | CCDC76   | CCDC76   | -    |
| hsa-miR-655 | CCDC80   | CCDC80   | -    |
| hsa-miR-655 | CCDC82   | CCDC82   | -    |
| hsa-miR-655 | CCDC85A  | CCDC85A  | -    |
| hsa-miR-655 | CCDC88C  | CCDC88C  | -    |
| hsa-miR-655 | CCDC93   | CCDC93   | -    |
| hsa-miR-655 | CCL22    | CCL22    | -    |
| hsa-miR-655 | CCL4     | CCL4     | -    |
| hsa-miR-655 | CCL4L1   | CCL4L1   | -    |
| hsa-miR-655 | CCL4L2   | CCL4L2   | -    |
| hsa-miR-655 | CCNA2    | CCNA2    | -    |
| hsa-miR-655 | CCND1    | CCND1    | -    |
| hsa-miR-655 | CCNE2    | CCNE2    | -    |
| hsa-miR-655 | CCNF     | CCNF     | -    |
| hsa-miR-655 | CCNG1    | CCNG1    | -    |
| hsa-miR-655 | CCNG2    | CCNG2    | -    |
| hsa-miR-655 | CCNJ     | CCNJ     | -    |
| hsa-miR-655 | CCNK     | CCNK     | -    |
| hsa-miR-655 | CCNY     | CCNY     | -    |
| hsa-miR-655 | CCNYL1   | CCNYL1   | -    |
| hsa-miR-655 | CCPG1    | CCPG1    | -    |
| hsa-miR-655 | CCR2     | CCR2     | -    |
| hsa-miR-655 | CCT5     | CCT5     | -    |
| hsa-miR-655 | CD163    | CD163    | -    |
| hsa-miR-655 | CD164    | CD164    | -    |
| hsa-miR-655 | -        | CD1B     | CD1B |
| hsa-miR-655 | CD1D     | CD1D     | -    |
| hsa-miR-655 | CD2AP    | CD2AP    | -    |
| hsa-miR-655 | CD36     | CD36     | -    |
| hsa-miR-655 | CD40     | CD40     | -    |
| hsa-miR-655 | CD46     | CD46     | -    |
| hsa-miR-655 | CD47     | CD47     | -    |
| hsa-miR-655 | CD58     | CD58     | -    |
| hsa-miR-655 | CDADC1   | CDADC1   | -    |

|             |         |         |        |
|-------------|---------|---------|--------|
| hsa-miR-655 | CDC14A  | CDC14A  | -      |
| hsa-miR-655 | CDC14B  | CDC14B  | -      |
| hsa-miR-655 | CDC27   | CDC27   | -      |
| hsa-miR-655 | CDC42   | CDC42   | -      |
| hsa-miR-655 | CDC73   | CDC73   | -      |
| hsa-miR-655 | CDCA4   | CDCA4   | -      |
| hsa-miR-655 | CDCA7   | CDCA7   | -      |
| hsa-miR-655 | CDH6    | CDH6    | -      |
| hsa-miR-655 | CDHR1   | CDHR1   | -      |
| hsa-miR-655 | CDK1    | CDK1    | -      |
| hsa-miR-655 | CDK14   | CDK14   | -      |
| hsa-miR-655 | CDK17   | CDK17   | -      |
| hsa-miR-655 | CDK19   | CDK19   | -      |
| hsa-miR-655 | CDK2AP1 | CDK2AP1 | -      |
| hsa-miR-655 | CDKL2   | CDKL2   | -      |
| hsa-miR-655 | CDKN2B  | CDKN2B  | -      |
| hsa-miR-655 | CDS1    | CDS1    | -      |
| hsa-miR-655 | CDS2    | CDS2    | -      |
| hsa-miR-655 | CDV3    | CDV3    | -      |
| hsa-miR-655 | CEBPA   | CEBPA   | -      |
| hsa-miR-655 | CEBPB   | CEBPB   | -      |
| hsa-miR-655 | CEBPG   | CEBPG   | -      |
| hsa-miR-655 | CECR2   | CECR2   | -      |
| hsa-miR-655 | CELF2   | CELF2   | -      |
| hsa-miR-655 | CENPN   | CENPN   | -      |
| hsa-miR-655 | CENPQ   | CENPQ   | -      |
| hsa-miR-655 | CEP120  | CEP120  | -      |
| hsa-miR-655 | CEP135  | CEP135  | -      |
| hsa-miR-655 | -       | CEP290  | CEP290 |
| hsa-miR-655 | CEP350  | CEP350  | -      |
| hsa-miR-655 | CEP68   | CEP68   | -      |
| hsa-miR-655 | -       | CETN3   | CETN3  |
| hsa-miR-655 | CFHR1   | CFHR1   | -      |
| hsa-miR-655 | CFHR5   | CFHR5   | -      |
| hsa-miR-655 | CGGBP1  | CGGBP1  | -      |
| hsa-miR-655 | CHAC2   | CHAC2   | -      |
| hsa-miR-655 | CHAD    | CHAD    | -      |
| hsa-miR-655 | CHD2    | CHD2    | -      |
| hsa-miR-655 | CHIC1   | CHIC1   | -      |
| hsa-miR-655 | CHL1    | CHL1    | -      |
| hsa-miR-655 | CHML    | CHML    | -      |
| hsa-miR-655 | CHMP2B  | CHMP2B  | -      |
| hsa-miR-655 | CHN2    | CHN2    | -      |
| hsa-miR-655 | CHORDC1 | CHORDC1 | -      |
| hsa-miR-655 | CHST2   | CHST2   | -      |
| hsa-miR-655 | CHSY1   | CHSY1   | -      |
| hsa-miR-655 | CHSY3   | CHSY3   | -      |
| hsa-miR-655 | CHUK    | CHUK    | -      |
| hsa-miR-655 | CIAO1   | CIAO1   | -      |
| hsa-miR-655 | CISD1   | CISD1   | -      |
| hsa-miR-655 | CIT     | CIT     | -      |

|             |          |          |   |
|-------------|----------|----------|---|
| hsa-miR-655 | CLASP1   | CLASP1   | - |
| hsa-miR-655 | CLASP2   | CLASP2   | - |
| hsa-miR-655 | CLCA2    | CLCA2    | - |
| hsa-miR-655 | CLCC1    | CLCC1    | - |
| hsa-miR-655 | CLCF1    | CLCF1    | - |
| hsa-miR-655 | CLDN1    | CLDN1    | - |
| hsa-miR-655 | CLDN12   | CLDN12   | - |
| hsa-miR-655 | CLDN8    | CLDN8    | - |
| hsa-miR-655 | CLEC12B  | CLEC12B  | - |
| hsa-miR-655 | CLEC7A   | CLEC7A   | - |
| hsa-miR-655 | CLIC4    | CLIC4    | - |
| hsa-miR-655 | CLIP1    | CLIP1    | - |
| hsa-miR-655 | CLIP4    | CLIP4    | - |
| hsa-miR-655 | CLLU1    | CLLU1    | - |
| hsa-miR-655 | CLRN1    | CLRN1    | - |
| hsa-miR-655 | CLSTN2   | CLSTN2   | - |
| hsa-miR-655 | CLTC     | CLTC     | - |
| hsa-miR-655 | CMPK2    | CMPK2    | - |
| hsa-miR-655 | CMTM4    | CMTM4    | - |
| hsa-miR-655 | CNBP     | CNBP     | - |
| hsa-miR-655 | CNKSR2   | CNKSR2   | - |
| hsa-miR-655 | CNOT6L   | CNOT6L   | - |
| hsa-miR-655 | CNR1     | CNR1     | - |
| hsa-miR-655 | CNRIP1   | CNRIP1   | - |
| hsa-miR-655 | CNST     | CNST     | - |
| hsa-miR-655 | CNTN3    | CNTN3    | - |
| hsa-miR-655 | CNTNAP2  | CNTNAP2  | - |
| hsa-miR-655 | CNTNAP3B | CNTNAP3B | - |
| hsa-miR-655 | CNTNAP4  | CNTNAP4  | - |
| hsa-miR-655 | COG3     | COG3     | - |
| hsa-miR-655 | COG5     | COG5     | - |
| hsa-miR-655 | COG6     | COG6     | - |
| hsa-miR-655 | COG7     | COG7     | - |
| hsa-miR-655 | COL11A2  | COL11A2  | - |
| hsa-miR-655 | COL4A1   | COL4A1   | - |
| hsa-miR-655 | COL4A3BP | COL4A3BP | - |
| hsa-miR-655 | COL4A4   | COL4A4   | - |
| hsa-miR-655 | COL5A3   | COL5A3   | - |
| hsa-miR-655 | COL6A6   | COL6A6   | - |
| hsa-miR-655 | COMMD1   | COMMD1   | - |
| hsa-miR-655 | COPS2    | COPS2    | - |
| hsa-miR-655 | COPS7A   | COPS7A   | - |
| hsa-miR-655 | COQ10B   | COQ10B   | - |
| hsa-miR-655 | CORO2A   | CORO2A   | - |
| hsa-miR-655 | COX11    | COX11    | - |
| hsa-miR-655 | COX15    | COX15    | - |
| hsa-miR-655 | COX4NB   | COX4NB   | - |
| hsa-miR-655 | CPD      | CPD      | - |
| hsa-miR-655 | CPEB2    | CPEB2    | - |
| hsa-miR-655 | CPEB3    | CPEB3    | - |
| hsa-miR-655 | CPM      | CPM      | - |

|             |          |          |   |
|-------------|----------|----------|---|
| hsa-miR-655 | CPOX     | CPOX     | - |
| hsa-miR-655 | CPPED1   | CPPED1   | - |
| hsa-miR-655 | CPSF6    | CPSF6    | - |
| hsa-miR-655 | CR1      | CR1      | - |
| hsa-miR-655 | CRBN     | CRBN     | - |
| hsa-miR-655 | CREBL2   | CREBL2   | - |
| hsa-miR-655 | CREBZF   | CREBZF   | - |
| hsa-miR-655 | CRISPLD1 | CRISPLD1 | - |
| hsa-miR-655 | CRKL     | CRKL     | - |
| hsa-miR-655 | CRLS1    | CRLS1    | - |
| hsa-miR-655 | CROT     | CROT     | - |
| hsa-miR-655 | CRYZL1   | CRYZL1   | - |
| hsa-miR-655 | CSMD1    | CSMD1    | - |
| hsa-miR-655 | CSN1S1   | CSN1S1   | - |
| hsa-miR-655 | CSNK1A1  | CSNK1A1  | - |
| hsa-miR-655 | CSRNP3   | CSRNP3   | - |
| hsa-miR-655 | CSTA     | CSTA     | - |
| hsa-miR-655 | CTAGE1   | CTAGE1   | - |
| hsa-miR-655 | CTBP2    | CTBP2    | - |
| hsa-miR-655 | CTDSP2   | CTDSP2   | - |
| hsa-miR-655 | CTDSPL   | CTDSPL   | - |
| hsa-miR-655 | CTDSPL2  | CTDSPL2  | - |
| hsa-miR-655 | CTSE     | CTSE     | - |
| hsa-miR-655 | CTSL2    | CTSL2    | - |
| hsa-miR-655 | CTSS     | CTSS     | - |
| hsa-miR-655 | CTTNBP2  | CTTNBP2  | - |
| hsa-miR-655 | CUL5     | CUL5     | - |
| hsa-miR-655 | CUX1     | CUX1     | - |
| hsa-miR-655 | CWF19L2  | CWF19L2  | - |
| hsa-miR-655 | CXADR    | CXADR    | - |
| hsa-miR-655 | CXCL12   | CXCL12   | - |
| hsa-miR-655 | CXCL6    | CXCL6    | - |
| hsa-miR-655 | CXorf23  | CXorf23  | - |
| hsa-miR-655 | CXorf36  | CXorf36  | - |
| hsa-miR-655 | CYB5B    | CYB5B    | - |
| hsa-miR-655 | CYBB     | CYBB     | - |
| hsa-miR-655 | CYFIP2   | CYFIP2   | - |
| hsa-miR-655 | CYLC2    | CYLC2    | - |
| hsa-miR-655 | CYLD     | CYLD     | - |
| hsa-miR-655 | CYP39A1  | CYP39A1  | - |
| hsa-miR-655 | CYP3A5   | CYP3A5   | - |
| hsa-miR-655 | CYP7A1   | CYP7A1   | - |
| hsa-miR-655 | CYYR1    | CYYR1    | - |
| hsa-miR-655 | DACH1    | DACH1    | - |
| hsa-miR-655 | DAPP1    | DAPP1    | - |
| hsa-miR-655 | DAZ1     | DAZ1     | - |
| hsa-miR-655 | DAZ2     | DAZ2     | - |
| hsa-miR-655 | DAZ3     | DAZ3     | - |
| hsa-miR-655 | DAZ4     | DAZ4     | - |
| hsa-miR-655 | DAZL     | DAZL     | - |
| hsa-miR-655 | DBX2     | DBX2     | - |

|             |         |         |        |
|-------------|---------|---------|--------|
| hsa-miR-655 | DCAF10  | DCAF10  | -      |
| hsa-miR-655 | DCAF4L1 | DCAF4L1 | -      |
| hsa-miR-655 | DCAF5   | DCAF5   | -      |
| hsa-miR-655 | DCBLD2  | DCBLD2  | -      |
| hsa-miR-655 | DCC     | DCC     | -      |
| hsa-miR-655 | DCDC2   | DCDC2   | -      |
| hsa-miR-655 | DCK     | DCK     | -      |
| hsa-miR-655 | DCLK1   | DCLK1   | -      |
| hsa-miR-655 | DCLRE1B | DCLRE1B | -      |
| hsa-miR-655 | DCP1A   | DCP1A   | -      |
| hsa-miR-655 | DCUN1D4 | DCUN1D4 | -      |
| hsa-miR-655 | DDHD1   | DDHD1   | -      |
| hsa-miR-655 | DDHD2   | DDHD2   | -      |
| hsa-miR-655 | DDI1    | DDI1    | -      |
| hsa-miR-655 | DDX17   | DDX17   | -      |
| hsa-miR-655 | DDX21   | DDX21   | -      |
| hsa-miR-655 | DDX3X   | DDX3X   | -      |
| hsa-miR-655 | DDX3Y   | DDX3Y   | -      |
| hsa-miR-655 | DDX46   | DDX46   | -      |
| hsa-miR-655 | DEFB132 | DEFB132 | -      |
| hsa-miR-655 | DEK     | DEK     | -      |
| hsa-miR-655 | DENND4A | DENND4A | -      |
| hsa-miR-655 | DENND4C | DENND4C | -      |
| hsa-miR-655 | DENND5B | DENND5B | -      |
| hsa-miR-655 | DEPDC1  | DEPDC1  | -      |
| hsa-miR-655 | DGKE    | DGKE    | -      |
| hsa-miR-655 | DHCR7   | -       | DHCR7  |
| hsa-miR-655 | DHFR    | DHFR    | -      |
| hsa-miR-655 | DHFRL1  | DHFRL1  | -      |
| hsa-miR-655 | -       | DHX29   | DHX29  |
| hsa-miR-655 | -       | DHX9    | DHX9   |
| hsa-miR-655 | DIAPH1  | DIAPH1  | -      |
| hsa-miR-655 | DICER1  | DICER1  | -      |
| hsa-miR-655 | -       | DIMT1L  | DIMT1L |
| hsa-miR-655 | DIP2B   | DIP2B   | -      |
| hsa-miR-655 | DIP2C   | DIP2C   | -      |
| hsa-miR-655 | DIRAS2  | DIRAS2  | -      |
| hsa-miR-655 | DISC1   | DISC1   | -      |
| hsa-miR-655 | DIXDC1  | DIXDC1  | -      |
| hsa-miR-655 | DKK3    | DKK3    | -      |
| hsa-miR-655 | DLAT    | DLAT    | -      |
| hsa-miR-655 | DLD     | DLD     | -      |
| hsa-miR-655 | DLG1    | DLG1    | -      |
| hsa-miR-655 | DLG3    | DLG3    | -      |
| hsa-miR-655 | DMD     | DMD     | -      |
| hsa-miR-655 | DMRTA2  | DMRTA2  | -      |
| hsa-miR-655 | DMWD    | DMWD    | -      |
| hsa-miR-655 | DNAJA2  | DNAJA2  | -      |
| hsa-miR-655 | DNAJA3  | DNAJA3  | -      |
| hsa-miR-655 | DNAJB5  | DNAJB5  | -      |
| hsa-miR-655 | DNAJC10 | DNAJC10 | -      |

|             |         |          |          |
|-------------|---------|----------|----------|
| hsa-miR-655 | DNAJC18 | DNAJC18  | -        |
| hsa-miR-655 | DNAJC19 | DNAJC19  | -        |
| hsa-miR-655 | DNAJC24 | DNAJC24  | -        |
| hsa-miR-655 | DNAJC27 | DNAJC27  | -        |
| hsa-miR-655 | DNAJC3  | DNAJC3   | -        |
| hsa-miR-655 | DNALI1  | DNALI1   | -        |
| hsa-miR-655 | -       | DNMT1    | DNMT1    |
| hsa-miR-655 | DOCK4   | DOCK4    | -        |
| hsa-miR-655 | DOCK9   | DOCK9    | -        |
| hsa-miR-655 | DOK6    | DOK6     | -        |
| hsa-miR-655 | -       | DOPEY2   | DOPEY2   |
| hsa-miR-655 | DOT1L   | DOT1L    | -        |
| hsa-miR-655 | DPF1    | DPF1     | -        |
| hsa-miR-655 | DPH3    | DPH3     | -        |
| hsa-miR-655 | DPP4    | DPP4     | -        |
| hsa-miR-655 | DPPA4   | DPPA4    | -        |
| hsa-miR-655 | DPY19L2 | DPY19L2  | -        |
| hsa-miR-655 | DPY19L4 | DPY19L4  | -        |
| hsa-miR-655 | DPYD    | DPYD     | -        |
| hsa-miR-655 | DPYSL5  | DPYSL5   | -        |
| hsa-miR-655 | DR1     | DR1      | -        |
| hsa-miR-655 | DRP2    | DRP2     | -        |
| hsa-miR-655 | DSC1    | DSC1     | -        |
| hsa-miR-655 | DSC3    | DSC3     | -        |
| hsa-miR-655 | DSG2    | DSG2     | -        |
| hsa-miR-655 | DSG3    | DSG3     | -        |
| hsa-miR-655 | DSN1    | DSN1     | -        |
| hsa-miR-655 | DSP     | DSP      | -        |
| hsa-miR-655 | DTNA    | DTNA     | -        |
| hsa-miR-655 | DTWD2   | DTWD2    | -        |
| hsa-miR-655 | DUSP19  | DUSP19   | -        |
| hsa-miR-655 | DYDC2   | DYDC2    | -        |
| hsa-miR-655 | DYNC2H1 | DYNC2H1  | -        |
| hsa-miR-655 | -       | DYNC2LI1 | DYNC2LI1 |
| hsa-miR-655 | DYNLRB2 | DYNLRB2  | -        |
| hsa-miR-655 | DYNLT3  | DYNLT3   | -        |
| hsa-miR-655 | DYRK1A  | DYRK1A   | -        |
| hsa-miR-655 | DYRK2   | DYRK2    | -        |
| hsa-miR-655 | DYTN    | DYTN     | -        |
| hsa-miR-655 | DZIP1   | DZIP1    | -        |
| hsa-miR-655 | DZIP3   | DZIP3    | -        |
| hsa-miR-655 | E2F6    | E2F6     | -        |
| hsa-miR-655 | E2F7    | E2F7     | -        |
| hsa-miR-655 | E2F8    | E2F8     | -        |
| hsa-miR-655 | EBF1    | EBF1     | -        |
| hsa-miR-655 | ECE1    | ECE1     | -        |
| hsa-miR-655 | ECT2    | ECT2     | -        |
| hsa-miR-655 | ECT2L   | ECT2L    | -        |
| hsa-miR-655 | EDA     | EDA      | -        |
| hsa-miR-655 | EDNRB   | EDNRB    | -        |
| hsa-miR-655 | EFHC1   | EFHC1    | -        |



|             |          |          |   |
|-------------|----------|----------|---|
| hsa-miR-655 | EFHD1    | EFHD1    | - |
| hsa-miR-655 | EFNA5    | EFNA5    | - |
| hsa-miR-655 | EFR3A    | EFR3A    | - |
| hsa-miR-655 | EGR1     | EGR1     | - |
| hsa-miR-655 | EGR2     | EGR2     | - |
| hsa-miR-655 | EI24     | EI24     | - |
| hsa-miR-655 | EIF2A    | EIF2A    | - |
| hsa-miR-655 | EIF2S2   | EIF2S2   | - |
| hsa-miR-655 | EIF2S3   | EIF2S3   | - |
| hsa-miR-655 | EIF3A    | EIF3A    | - |
| hsa-miR-655 | EIF3L    | EIF3L    | - |
| hsa-miR-655 | EIF4A2   | EIF4A2   | - |
| hsa-miR-655 | EIF4E    | EIF4E    | - |
| hsa-miR-655 | EIF4E3   | EIF4E3   | - |
| hsa-miR-655 | EIF5A2   | EIF5A2   | - |
| hsa-miR-655 | ELAVL4   | ELAVL4   | - |
| hsa-miR-655 | ELF1     | ELF1     | - |
| hsa-miR-655 | ELK3     | ELK3     | - |
| hsa-miR-655 | ELMO1    | ELMO1    | - |
| hsa-miR-655 | ELMOD2   | ELMOD2   | - |
| hsa-miR-655 | ELOVL2   | ELOVL2   | - |
| hsa-miR-655 | ELOVL5   | ELOVL5   | - |
| hsa-miR-655 | ELOVL6   | ELOVL6   | - |
| hsa-miR-655 | ELOVL7   | ELOVL7   | - |
| hsa-miR-655 | EMB      | EMB      | - |
| hsa-miR-655 | EME1     | EME1     | - |
| hsa-miR-655 | EML1     | EML1     | - |
| hsa-miR-655 | EML4     | EML4     | - |
| hsa-miR-655 | EMP1     | EMP1     | - |
| hsa-miR-655 | EN2      | EN2      | - |
| hsa-miR-655 | ENO4     | ENO4     | - |
| hsa-miR-655 | ENOX2    | ENOX2    | - |
| hsa-miR-655 | ENPP3    | ENPP3    | - |
| hsa-miR-655 | ENPP4    | ENPP4    | - |
| hsa-miR-655 | EP300    | EP300    | - |
| hsa-miR-655 | EPAS1    | EPAS1    | - |
| hsa-miR-655 | EPB41    | EPB41    | - |
| hsa-miR-655 | EPB41L2  | EPB41L2  | - |
| hsa-miR-655 | EPB41L4B | EPB41L4B | - |
| hsa-miR-655 | EPB41L5  | EPB41L5  | - |
| hsa-miR-655 | EPHA4    | EPHA4    | - |
| hsa-miR-655 | EPHA5    | EPHA5    | - |
| hsa-miR-655 | EPM2AIP1 | EPM2AIP1 | - |
| hsa-miR-655 | EPS15    | EPS15    | - |
| hsa-miR-655 | EPT1     | EPT1     | - |
| hsa-miR-655 | ERAP1    | ERAP1    | - |
| hsa-miR-655 | ERBB2IP  | ERBB2IP  | - |
| hsa-miR-655 | ERBB4    | ERBB4    | - |
| hsa-miR-655 | ERC2     | ERC2     | - |
| hsa-miR-655 | ERG      | ERG      | - |
| hsa-miR-655 | ERICH1   | ERICH1   | - |

|             |          |          |          |
|-------------|----------|----------|----------|
| hsa-miR-655 | ERMP1    | ERMP1    | -        |
| hsa-miR-655 | ERRFI1   | ERRFI1   | -        |
| hsa-miR-655 | ESCO2    | ESCO2    | -        |
| hsa-miR-655 | ESRP1    | ESRP1    | -        |
| hsa-miR-655 | ESRRG    | ESRRG    | -        |
| hsa-miR-655 | ESYT2    | ESYT2    | -        |
| hsa-miR-655 | ESYT3    | ESYT3    | -        |
| hsa-miR-655 | ETF1     | ETF1     | -        |
| hsa-miR-655 | ETNK1    | ETNK1    | -        |
| hsa-miR-655 | ETS1     | ETS1     | -        |
| hsa-miR-655 | ETV1     | ETV1     | -        |
| hsa-miR-655 | ETV5     | ETV5     | -        |
| hsa-miR-655 | EVC      | EVC      | -        |
| hsa-miR-655 | EVI2B    | EVI2B    | -        |
| hsa-miR-655 | EXOC2    | EXOC2    | -        |
| hsa-miR-655 | EXOC5    | EXOC5    | -        |
| hsa-miR-655 | EXOC8    | EXOC8    | -        |
| hsa-miR-655 | EXTL2    | EXTL2    | -        |
| hsa-miR-655 | EYA1     | EYA1     | -        |
| hsa-miR-655 | EYA4     | EYA4     | -        |
| hsa-miR-655 | EYS      | EYS      | -        |
| hsa-miR-655 | F13A1    | F13A1    | -        |
| hsa-miR-655 | F2R      | F2R      | -        |
| hsa-miR-655 | F2RL1    | F2RL1    | -        |
| hsa-miR-655 | FABP2    | FABP2    | -        |
| hsa-miR-655 | FAF2     | FAF2     | -        |
| hsa-miR-655 | FAM104A  | FAM104A  | -        |
| hsa-miR-655 | FAM107B  | FAM107B  | -        |
| hsa-miR-655 | -        | FAM108B1 | FAM108B1 |
| hsa-miR-655 | FAM114A2 | FAM114A2 | -        |
| hsa-miR-655 | FAM118B  | FAM118B  | -        |
| hsa-miR-655 | FAM123C  | FAM123C  | -        |
| hsa-miR-655 | FAM126A  | FAM126A  | -        |
| hsa-miR-655 | FAM133B  | FAM133B  | -        |
| hsa-miR-655 | FAM134A  | FAM134A  | -        |
| hsa-miR-655 | FAM134B  | FAM134B  | -        |
| hsa-miR-655 | FAM135A  | FAM135A  | -        |
| hsa-miR-655 | FAM13C   | FAM13C   | -        |
| hsa-miR-655 | FAM150B  | FAM150B  | -        |
| hsa-miR-655 | FAM161A  | FAM161A  | -        |
| hsa-miR-655 | FAM162A  | FAM162A  | -        |
| hsa-miR-655 | FAM164A  | FAM164A  | -        |
| hsa-miR-655 | FAM168B  | FAM168B  | -        |
| hsa-miR-655 | FAM169A  | FAM169A  | -        |
| hsa-miR-655 | FAM174A  | FAM174A  | -        |
| hsa-miR-655 | FAM175B  | FAM175B  | -        |
| hsa-miR-655 | FAM176A  | FAM176A  | -        |
| hsa-miR-655 | FAM18B2  | FAM18B2  | -        |
| hsa-miR-655 | FAM190A  | FAM190A  | -        |
| hsa-miR-655 | FAM193A  | FAM193A  | -        |
| hsa-miR-655 | FAM196A  | FAM196A  | -        |

|             |          |          |   |
|-------------|----------|----------|---|
| hsa-miR-655 | FAM19A2  | FAM19A2  | - |
| hsa-miR-655 | FAM19A4  | FAM19A4  | - |
| hsa-miR-655 | FAM20B   | FAM20B   | - |
| hsa-miR-655 | FAM46A   | FAM46A   | - |
| hsa-miR-655 | FAM46D   | FAM46D   | - |
| hsa-miR-655 | FAM49A   | FAM49A   | - |
| hsa-miR-655 | FAM60A   | FAM60A   | - |
| hsa-miR-655 | FAM63B   | FAM63B   | - |
| hsa-miR-655 | FAM69A   | FAM69A   | - |
| hsa-miR-655 | FAM72A   | FAM72A   | - |
| hsa-miR-655 | FAM72B   | FAM72B   | - |
| hsa-miR-655 | FAM72D   | FAM72D   | - |
| hsa-miR-655 | FAM73A   | FAM73A   | - |
| hsa-miR-655 | FAM76A   | FAM76A   | - |
| hsa-miR-655 | FAM76B   | FAM76B   | - |
| hsa-miR-655 | FAM89A   | FAM89A   | - |
| hsa-miR-655 | FAM8A1   | FAM8A1   | - |
| hsa-miR-655 | FAR1     | FAR1     | - |
| hsa-miR-655 | FAR2     | FAR2     | - |
| hsa-miR-655 | FARP1    | FARP1    | - |
| hsa-miR-655 | FAS      | FAS      | - |
| hsa-miR-655 | FASTKD3  | FASTKD3  | - |
| hsa-miR-655 | FAT4     | FAT4     | - |
| hsa-miR-655 | FBN1     | FBN1     | - |
| hsa-miR-655 | FBXL14   | FBXL14   | - |
| hsa-miR-655 | FBXL17   | FBXL17   | - |
| hsa-miR-655 | FBXL3    | FBXL3    | - |
| hsa-miR-655 | FBXL4    | FBXL4    | - |
| hsa-miR-655 | FBXO11   | FBXO11   | - |
| hsa-miR-655 | FBXO22   | FBXO22   | - |
| hsa-miR-655 | FBXO30   | FBXO30   | - |
| hsa-miR-655 | FBXO33   | FBXO33   | - |
| hsa-miR-655 | FBXO4    | FBXO4    | - |
| hsa-miR-655 | FBXO45   | FBXO45   | - |
| hsa-miR-655 | FBXW11   | FBXW11   | - |
| hsa-miR-655 | FCHSD2   | FCHSD2   | - |
| hsa-miR-655 | FCRL1    | FCRL1    | - |
| hsa-miR-655 | FCRL2    | FCRL2    | - |
| hsa-miR-655 | FDX1     | FDX1     | - |
| hsa-miR-655 | FERMT2   | FERMT2   | - |
| hsa-miR-655 | FGA      | FGA      | - |
| hsa-miR-655 | FGD4     | FGD4     | - |
| hsa-miR-655 | FGD6     | FGD6     | - |
| hsa-miR-655 | FGF1     | FGF1     | - |
| hsa-miR-655 | FGF2     | FGF2     | - |
| hsa-miR-655 | FGFR1OP2 | FGFR1OP2 | - |
| hsa-miR-655 | FGL2     | FGL2     | - |
| hsa-miR-655 | FH       | FH       | - |
| hsa-miR-655 | FHDC1    | FHDC1    | - |
| hsa-miR-655 | FHL5     | FHL5     | - |
| hsa-miR-655 | FIGN     | FIGN     | - |

|             |           |           |         |
|-------------|-----------|-----------|---------|
| hsa-miR-655 | -         | FILIP1L   | FILIP1L |
| hsa-miR-655 | FLI1      | FLI1      | -       |
| hsa-miR-655 | FLJ23152  | FLJ23152  | -       |
| hsa-miR-655 | FLJ42280  | FLJ42280  | -       |
| hsa-miR-655 | FLRT3     | FLRT3     | -       |
| hsa-miR-655 | FLT1      | FLT1      | -       |
| hsa-miR-655 | FLT4      | FLT4      | -       |
| hsa-miR-655 | FLVCR2    | FLVCR2    | -       |
| hsa-miR-655 | FMO2      | FMO2      | -       |
| hsa-miR-655 | FMO5      | FMO5      | -       |
| hsa-miR-655 | FNBP1L    | FNBP1L    | -       |
| hsa-miR-655 | FNBP4     | FNBP4     | -       |
| hsa-miR-655 | FNDC3B    | FNDC3B    | -       |
| hsa-miR-655 | FNIP1     | FNIP1     | -       |
| hsa-miR-655 | FNTB      | FNTB      | -       |
| hsa-miR-655 | FOXC1     | FOXC1     | -       |
| hsa-miR-655 | FOXF1     | FOXF1     | -       |
| hsa-miR-655 | FOXG1     | FOXG1     | -       |
| hsa-miR-655 | FOXL1     | FOXL1     | -       |
| hsa-miR-655 | FOXO1     | FOXO1     | -       |
| hsa-miR-655 | FOXP1     | FOXP1     | -       |
| hsa-miR-655 | FOXP2     | FOXP2     | -       |
| hsa-miR-655 | FPGT      | FPGT      | -       |
| hsa-miR-655 | FPR2      | FPR2      | -       |
| hsa-miR-655 | FRAS1     | FRAS1     | -       |
| hsa-miR-655 | FREM2     | FREM2     | -       |
| hsa-miR-655 | FRG2      | FRG2      | -       |
| hsa-miR-655 | FRG2C     | FRG2C     | -       |
| hsa-miR-655 | FRMD4A    | FRMD4A    | -       |
| hsa-miR-655 | FRMD7     | FRMD7     | -       |
| hsa-miR-655 | -         | FRY       | FRY     |
| hsa-miR-655 | FSD1L     | FSD1L     | -       |
| hsa-miR-655 | FSTL1     | FSTL1     | -       |
| hsa-miR-655 | FTSJ1     | FTSJ1     | -       |
| hsa-miR-655 | FTSJD1    | FTSJD1    | -       |
| hsa-miR-655 | FUBP3     | FUBP3     | -       |
| hsa-miR-655 | FXN       | FXN       | -       |
| hsa-miR-655 | FYB       | FYB       | -       |
| hsa-miR-655 | FYTTD1    | FYTTD1    | -       |
| hsa-miR-655 | FZD3      | FZD3      | -       |
| hsa-miR-655 | FZD4      | FZD4      | -       |
| hsa-miR-655 | FZD5      | FZD5      | -       |
| hsa-miR-655 | FZD6      | FZD6      | -       |
| hsa-miR-655 | G6PC2     | G6PC2     | -       |
| hsa-miR-655 | GABARAPL2 | GABARAPL2 | -       |
| hsa-miR-655 | GABBR2    | GABBR2    | -       |
| hsa-miR-655 | GABPA     | GABPA     | -       |
| hsa-miR-655 | GABPB1    | GABPB1    | -       |
| hsa-miR-655 | GABRB3    | GABRB3    | -       |
| hsa-miR-655 | GABRG2    | GABRG2    | -       |
| hsa-miR-655 | GALK2     | GALK2     | -       |

|             |         |         |        |
|-------------|---------|---------|--------|
| hsa-miR-655 | GAPT    | GAPT    | -      |
| hsa-miR-655 | GAPVD1  | GAPVD1  | -      |
| hsa-miR-655 | GAS1    | GAS1    | -      |
| hsa-miR-655 | GCA     | GCA     | -      |
| hsa-miR-655 | GCC2    | GCC2    | -      |
| hsa-miR-655 | GCOM1   | GCOM1   | -      |
| hsa-miR-655 | GDA     | GDA     | -      |
| hsa-miR-655 | GDAP1   | GDAP1   | -      |
| hsa-miR-655 | GFI1    | GFI1    | -      |
| hsa-miR-655 | GFRA2   | GFRA2   | -      |
| hsa-miR-655 | GIMAP5  | GIMAP5  | -      |
| hsa-miR-655 | GJA3    | GJA3    | -      |
| hsa-miR-655 | GLIPR1  | GLIPR1  | -      |
| hsa-miR-655 | GLRB    | GLRB    | -      |
| hsa-miR-655 | GLRX    | GLRX    | -      |
| hsa-miR-655 | GM2A    | GM2A    | -      |
| hsa-miR-655 | -       | GMNN    | GMNN   |
| hsa-miR-655 | GMPR2   | GMPR2   | -      |
| hsa-miR-655 | GNAI1   | GNAI1   | -      |
| hsa-miR-655 | GNAI3   | GNAI3   | -      |
| hsa-miR-655 | GNAO1   | GNAO1   | -      |
| hsa-miR-655 | GNAQ    | GNAQ    | -      |
| hsa-miR-655 | GNE     | GNE     | -      |
| hsa-miR-655 | GNRHR   | GNRHR   | -      |
| hsa-miR-655 | GOLGA8A | GOLGA8A | -      |
| hsa-miR-655 | GOLGA8B | GOLGA8B | -      |
| hsa-miR-655 | GOLIM4  | GOLIM4  | -      |
| hsa-miR-655 | GOLPH3  | GOLPH3  | -      |
| hsa-miR-655 | GOPC    | GOPC    | -      |
| hsa-miR-655 | GPATCH8 | GPATCH8 | -      |
| hsa-miR-655 | GPC6    | GPC6    | -      |
| hsa-miR-655 | GPD2    | GPD2    | -      |
| hsa-miR-655 | GPM6A   | GPM6A   | -      |
| hsa-miR-655 | GPN3    | GPN3    | -      |
| hsa-miR-655 | GPR124  | GPR124  | -      |
| hsa-miR-655 | -       | GPR125  | GPR125 |
| hsa-miR-655 | GPR126  | GPR126  | -      |
| hsa-miR-655 | GPR132  | GPR132  | -      |
| hsa-miR-655 | GPR137C | GPR137C | -      |
| hsa-miR-655 | GPR155  | GPR155  | -      |
| hsa-miR-655 | GPR162  | GPR162  | -      |
| hsa-miR-655 | GPR180  | GPR180  | -      |
| hsa-miR-655 | GPR85   | GPR85   | -      |
| hsa-miR-655 | GPRASP2 | GPRASP2 | -      |
| hsa-miR-655 | GPX7    | GPX7    | -      |
| hsa-miR-655 | GRAMD4  | GRAMD4  | -      |
| hsa-miR-655 | GRB10   | GRB10   | -      |
| hsa-miR-655 | GREM1   | GREM1   | -      |
| hsa-miR-655 | GREM2   | GREM2   | -      |
| hsa-miR-655 | GRIA1   | GRIA1   | -      |
| hsa-miR-655 | GRIA4   | GRIA4   | -      |

|             |           |           |   |
|-------------|-----------|-----------|---|
| hsa-miR-655 | GRIP1     | GRIP1     | - |
| hsa-miR-655 | GRM1      | GRM1      | - |
| hsa-miR-655 | GRM3      | GRM3      | - |
| hsa-miR-655 | GSG1L     | GSG1L     | - |
| hsa-miR-655 | GSPT1     | GSPT1     | - |
| hsa-miR-655 | GTDC1     | GTDC1     | - |
| hsa-miR-655 | GTF2E1    | GTF2E1    | - |
| hsa-miR-655 | GTF2H1    | GTF2H1    | - |
| hsa-miR-655 | GTF2IRD2  | GTF2IRD2  | - |
| hsa-miR-655 | GTF2IRD2B | GTF2IRD2B | - |
| hsa-miR-655 | GUCY1A3   | GUCY1A3   | - |
| hsa-miR-655 | GUCY1B3   | GUCY1B3   | - |
| hsa-miR-655 | GUF1      | GUF1      | - |
| hsa-miR-655 | GXYLT1    | GXYLT1    | - |
| hsa-miR-655 | GYP A     | GYP A     | - |
| hsa-miR-655 | H3F3B     | H3F3B     | - |
| hsa-miR-655 | HACE1     | HACE1     | - |
| hsa-miR-655 | HAPLN1    | HAPLN1    | - |
| hsa-miR-655 | HAUS5     | HAUS5     | - |
| hsa-miR-655 | HAUS6     | HAUS6     | - |
| hsa-miR-655 | HCFC1     | HCFC1     | - |
| hsa-miR-655 | HCN1      | HCN1      | - |
| hsa-miR-655 | HDAC2     | HDAC2     | - |
| hsa-miR-655 | HDAC9     | HDAC9     | - |
| hsa-miR-655 | HDGFRP3   | HDGFRP3   | - |
| hsa-miR-655 | HDHD2     | HDHD2     | - |
| hsa-miR-655 | HEATR5A   | HEATR5A   | - |
| hsa-miR-655 | HECA      | HECA      | - |
| hsa-miR-655 | HECTD1    | HECTD1    | - |
| hsa-miR-655 | HECTD2    | HECTD2    | - |
| hsa-miR-655 | HEG1      | HEG1      | - |
| hsa-miR-655 | HEPACAM   | HEPACAM   | - |
| hsa-miR-655 | HERPUD2   | HERPUD2   | - |
| hsa-miR-655 | HEY1      | HEY1      | - |
| hsa-miR-655 | HIF3A     | HIF3A     | - |
| hsa-miR-655 | HIPK3     | HIPK3     | - |
| hsa-miR-655 | HK1       | HK1       | - |
| hsa-miR-655 | HLTF      | HLTF      | - |
| hsa-miR-655 | HM13      | HM13      | - |
| hsa-miR-655 | HMGA2     | HMGA2     | - |
| hsa-miR-655 | HMGCR     | HMGCR     | - |
| hsa-miR-655 | HMGN2     | HMGN2     | - |
| hsa-miR-655 | HN1L      | HN1L      | - |
| hsa-miR-655 | HNRNPA3   | HNRNPA3   | - |
| hsa-miR-655 | HNRNPH3   | HNRNPH3   | - |
| hsa-miR-655 | HNRPDL    | HNRPDL    | - |
| hsa-miR-655 | HOMER1    | HOMER1    | - |
| hsa-miR-655 | HOOK1     | HOOK1     | - |
| hsa-miR-655 | HOXB3     | HOXB3     | - |
| hsa-miR-655 | HOXD8     | HOXD8     | - |
| hsa-miR-655 | HPGD      | HPGD      | - |

|             |          |          |        |
|-------------|----------|----------|--------|
| hsa-miR-655 | HPS5     | HPS5     | -      |
| hsa-miR-655 | HRNR     | HRNR     | -      |
| hsa-miR-655 | HRSP12   | HRSP12   | -      |
| hsa-miR-655 | -        | HS3ST1   | HS3ST1 |
| hsa-miR-655 | HS3ST5   | HS3ST5   | -      |
| hsa-miR-655 | HSD17B12 | HSD17B12 | -      |
| hsa-miR-655 | HSD17B13 | HSD17B13 | -      |
| hsa-miR-655 | HSD17B6  | HSD17B6  | -      |
| hsa-miR-655 | HSPA12A  | HSPA12A  | -      |
| hsa-miR-655 | HSPA13   | HSPA13   | -      |
| hsa-miR-655 | -        | HSPA8    | HSPA8  |
| hsa-miR-655 | HSPC159  | HSPC159  | -      |
| hsa-miR-655 | HTR1F    | HTR1F    | -      |
| hsa-miR-655 | HTR2B    | HTR2B    | -      |
| hsa-miR-655 | HTR2C    | HTR2C    | -      |
| hsa-miR-655 | -        | IARS2    | IARS2  |
| hsa-miR-655 | IBSP     | IBSP     | -      |
| hsa-miR-655 | IBTK     | IBTK     | -      |
| hsa-miR-655 | ICK      | ICK      | -      |
| hsa-miR-655 | -        | ID1      | ID1    |
| hsa-miR-655 | IDI1     | IDI1     | -      |
| hsa-miR-655 | IER3IP1  | IER3IP1  | -      |
| hsa-miR-655 | IER5     | IER5     | -      |
| hsa-miR-655 | IFIT2    | IFIT2    | -      |
| hsa-miR-655 | IFIT5    | IFIT5    | -      |
| hsa-miR-655 | IFNW1    | IFNW1    | -      |
| hsa-miR-655 | IKBKB    | IKBKB    | -      |
| hsa-miR-655 | IKZF2    | IKZF2    | -      |
| hsa-miR-655 | IL17A    | IL17A    | -      |
| hsa-miR-655 | IL17C    | IL17C    | -      |
| hsa-miR-655 | IL17F    | IL17F    | -      |
| hsa-miR-655 | IL18R1   | IL18R1   | -      |
| hsa-miR-655 | -        | IL20     | IL20   |
| hsa-miR-655 | -        | IL23A    | IL23A  |
| hsa-miR-655 | IMMP2L   | IMMP2L   | -      |
| hsa-miR-655 | IMPACT   | IMPACT   | -      |
| hsa-miR-655 | IMPAD1   | IMPAD1   | -      |
| hsa-miR-655 | IMPDH1   | IMPDH1   | -      |
| hsa-miR-655 | INADL    | INADL    | -      |
| hsa-miR-655 | ING3     | ING3     | -      |
| hsa-miR-655 | INHBB    | INHBB    | -      |
| hsa-miR-655 | INO80E   | INO80E   | -      |
| hsa-miR-655 | INPP4A   | INPP4A   | -      |
| hsa-miR-655 | INSIG2   | INSIG2   | -      |
| hsa-miR-655 | INTS7    | INTS7    | -      |
| hsa-miR-655 | INTS8    | INTS8    | -      |
| hsa-miR-655 | IPMK     | IPMK     | -      |
| hsa-miR-655 | IPO5     | IPO5     | -      |
| hsa-miR-655 | IPO7     | IPO7     | -      |
| hsa-miR-655 | IPO8     | IPO8     | -      |
| hsa-miR-655 | IREB2    | IREB2    | -      |

|             |          |          |   |
|-------------|----------|----------|---|
| hsa-miR-655 | IRF4     | IRF4     | - |
| hsa-miR-655 | IRS1     | IRS1     | - |
| hsa-miR-655 | IRX5     | IRX5     | - |
| hsa-miR-655 | ISOC1    | ISOC1    | - |
| hsa-miR-655 | ITCH     | ITCH     | - |
| hsa-miR-655 | ITGA1    | ITGA1    | - |
| hsa-miR-655 | ITGA4    | ITGA4    | - |
| hsa-miR-655 | ITGAE    | ITGAE    | - |
| hsa-miR-655 | ITGAV    | ITGAV    | - |
| hsa-miR-655 | ITGB3    | ITGB3    | - |
| hsa-miR-655 | ITGB8    | ITGB8    | - |
| hsa-miR-655 | ITPR2    | ITPR2    | - |
| hsa-miR-655 | ITSN1    | ITSN1    | - |
| hsa-miR-655 | IVD      | IVD      | - |
| hsa-miR-655 | IYD      | IYD      | - |
| hsa-miR-655 | JARID2   | JARID2   | - |
| hsa-miR-655 | JHDM1D   | JHDM1D   | - |
| hsa-miR-655 | JMJD1C   | JMJD1C   | - |
| hsa-miR-655 | JMY      | JMY      | - |
| hsa-miR-655 | JUN      | JUN      | - |
| hsa-miR-655 | KAL1     | KAL1     | - |
| hsa-miR-655 | KANK1    | KANK1    | - |
| hsa-miR-655 | KBTBD2   | KBTBD2   | - |
| hsa-miR-655 | KBTBD6   | KBTBD6   | - |
| hsa-miR-655 | KBTBD8   | KBTBD8   | - |
| hsa-miR-655 | KCMF1    | KCMF1    | - |
| hsa-miR-655 | KCNH8    | KCNH8    | - |
| hsa-miR-655 | KCNJ1    | KCNJ1    | - |
| hsa-miR-655 | KCNJ13   | KCNJ13   | - |
| hsa-miR-655 | KCNJ16   | KCNJ16   | - |
| hsa-miR-655 | KCNT2    | KCNT2    | - |
| hsa-miR-655 | KCNV1    | KCNV1    | - |
| hsa-miR-655 | KCTD1    | KCTD1    | - |
| hsa-miR-655 | KCTD10   | KCTD10   | - |
| hsa-miR-655 | KCTD12   | KCTD12   | - |
| hsa-miR-655 | KCTD16   | KCTD16   | - |
| hsa-miR-655 | KCTD21   | KCTD21   | - |
| hsa-miR-655 | KCTD4    | KCTD4    | - |
| hsa-miR-655 | KCTD8    | KCTD8    | - |
| hsa-miR-655 | KDELC1   | KDELC1   | - |
| hsa-miR-655 | KDELC2   | KDELC2   | - |
| hsa-miR-655 | KDELR3   | KDELR3   | - |
| hsa-miR-655 | KDM1B    | KDM1B    | - |
| hsa-miR-655 | KDM5A    | KDM5A    | - |
| hsa-miR-655 | KDR      | KDR      | - |
| hsa-miR-655 | KDSR     | KDSR     | - |
| hsa-miR-655 | KHDRBS2  | KHDRBS2  | - |
| hsa-miR-655 | KIAA0040 | KIAA0040 | - |
| hsa-miR-655 | KIAA0101 | KIAA0101 | - |
| hsa-miR-655 | KIAA0195 | KIAA0195 | - |
| hsa-miR-655 | KIAA0232 | KIAA0232 | - |



|             |           |           |          |
|-------------|-----------|-----------|----------|
| hsa-miR-655 | KIAA0355  | KIAA0355  | -        |
| hsa-miR-655 | KIAA0586  | KIAA0586  | -        |
| hsa-miR-655 | KIAA0748  | KIAA0748  | -        |
| hsa-miR-655 | KIAA0776  | KIAA0776  | -        |
| hsa-miR-655 | KIAA0895  | KIAA0895  | -        |
| hsa-miR-655 | -         | KIAA1012  | KIAA1012 |
| hsa-miR-655 | KIAA1024  | KIAA1024  | -        |
| hsa-miR-655 | KIAA1210  | KIAA1210  | -        |
| hsa-miR-655 | KIAA1239  | KIAA1239  | -        |
| hsa-miR-655 | KIAA1244  | KIAA1244  | -        |
| hsa-miR-655 | KIAA1328  | KIAA1328  | -        |
| hsa-miR-655 | KIAA1370  | KIAA1370  | -        |
| hsa-miR-655 | KIAA1432  | KIAA1432  | -        |
| hsa-miR-655 | KIAA1468  | KIAA1468  | -        |
| hsa-miR-655 | KIAA1486  | KIAA1486  | -        |
| hsa-miR-655 | KIAA1530  | KIAA1530  | -        |
| hsa-miR-655 | KIAA1598  | KIAA1598  | -        |
| hsa-miR-655 | KIAA1609  | KIAA1609  | -        |
| hsa-miR-655 | KIAA1715  | KIAA1715  | -        |
| hsa-miR-655 | KIAA1804  | KIAA1804  | -        |
| hsa-miR-655 | KIAA2022  | KIAA2022  | -        |
| hsa-miR-655 | KIF11     | KIF11     | -        |
| hsa-miR-655 | KIF1B     | KIF1B     | -        |
| hsa-miR-655 | KIF24     | KIF24     | -        |
| hsa-miR-655 | KIF3B     | KIF3B     | -        |
| hsa-miR-655 | KIF5B     | KIF5B     | -        |
| hsa-miR-655 | KITLG     | KITLG     | -        |
| hsa-miR-655 | KL        | KL        | -        |
| hsa-miR-655 | KLC1      | KLC1      | -        |
| hsa-miR-655 | KLF10     | KLF10     | -        |
| hsa-miR-655 | KLF2      | KLF2      | -        |
| hsa-miR-655 | KLF3      | KLF3      | -        |
| hsa-miR-655 | KLF5      | KLF5      | -        |
| hsa-miR-655 | KLF8      | KLF8      | -        |
| hsa-miR-655 | KLF9      | KLF9      | -        |
| hsa-miR-655 | KLHDC1    | KLHDC1    | -        |
| hsa-miR-655 | KLHDC10   | KLHDC10   | -        |
| hsa-miR-655 | KLHDC5    | KLHDC5    | -        |
| hsa-miR-655 | KLHL1     | KLHL1     | -        |
| hsa-miR-655 | KLHL18    | KLHL18    | -        |
| hsa-miR-655 | KLHL20    | KLHL20    | -        |
| hsa-miR-655 | KLHL24    | KLHL24    | -        |
| hsa-miR-655 | KLHL28    | KLHL28    | -        |
| hsa-miR-655 | KLHL3     | KLHL3     | -        |
| hsa-miR-655 | KLHL6     | KLHL6     | -        |
| hsa-miR-655 | KLHL9     | KLHL9     | -        |
| hsa-miR-655 | KMO       | KMO       | -        |
| hsa-miR-655 | KNTC1     | KNTC1     | -        |
| hsa-miR-655 | KPNA6     | KPNA6     | -        |
| hsa-miR-655 | KRT85     | KRT85     | -        |
| hsa-miR-655 | KRTAP4-11 | KRTAP4-11 | -        |

|             |              |              |        |
|-------------|--------------|--------------|--------|
| hsa-miR-655 | KRTAP4-5     | KRTAP4-5     | -      |
| hsa-miR-655 | KRTAP4-8     | KRTAP4-8     | -      |
| hsa-miR-655 | KRTAP7-1     | KRTAP7-1     | -      |
| hsa-miR-655 | -            | KYNU         | KYNU   |
| hsa-miR-655 | LAMP2        | LAMP2        | -      |
| hsa-miR-655 | LARP1        | LARP1        | -      |
| hsa-miR-655 | LARP4        | LARP4        | -      |
| hsa-miR-655 | LARP4B       | LARP4B       | -      |
| hsa-miR-655 | LBR          | LBR          | -      |
| hsa-miR-655 | LDB3         | LDB3         | -      |
| hsa-miR-655 | LDHA         | -            | LDHA   |
| hsa-miR-655 | LEPR         | LEPR         | -      |
| hsa-miR-655 | LGR4         | LGR4         | -      |
| hsa-miR-655 | LGSN         | LGSN         | -      |
| hsa-miR-655 | LIMK1        | LIMK1        | -      |
| hsa-miR-655 | LIN28B       | LIN28B       | -      |
| hsa-miR-655 | LIN54        | LIN54        | -      |
| hsa-miR-655 | LMAN1        | LMAN1        | -      |
| hsa-miR-655 | LMBR1        | LMBR1        | -      |
| hsa-miR-655 | LMBRD1       | LMBRD1       | -      |
| hsa-miR-655 | LMO4         | LMO4         | -      |
| hsa-miR-655 | LNX1         | LNX1         | -      |
| hsa-miR-655 | LOC100130932 | LOC100130932 | -      |
| hsa-miR-655 | LOC100329135 | LOC100329135 | -      |
| hsa-miR-655 | LOC221710    | LOC221710    | -      |
| hsa-miR-655 | LOC253044    | LOC253044    | -      |
| hsa-miR-655 | LOC284385    | LOC284385    | -      |
| hsa-miR-655 | LOC390595    | LOC390595    | -      |
| hsa-miR-655 | LOX          | LOX          | -      |
| hsa-miR-655 | LPCAT3       | LPCAT3       | -      |
| hsa-miR-655 | LPHN2        | LPHN2        | -      |
| hsa-miR-655 | LPHN3        | LPHN3        | -      |
| hsa-miR-655 | LPP          | LPP          | -      |
| hsa-miR-655 | LRAT         | LRAT         | -      |
| hsa-miR-655 | LRCH2        | LRCH2        | -      |
| hsa-miR-655 | LRP1B        | LRP1B        | -      |
| hsa-miR-655 | LRP6         | LRP6         | -      |
| hsa-miR-655 | -            | LRRC17       | LRRC17 |
| hsa-miR-655 | LRRC18       | LRRC18       | -      |
| hsa-miR-655 | LRRC19       | LRRC19       | -      |
| hsa-miR-655 | LRRC32       | LRRC32       | -      |
| hsa-miR-655 | LRRC58       | LRRC58       | -      |
| hsa-miR-655 | LRRC8A       | LRRC8A       | -      |
| hsa-miR-655 | LRRFIP1      | LRRFIP1      | -      |
| hsa-miR-655 | LRRN3        | LRRN3        | -      |
| hsa-miR-655 | LRRTM2       | LRRTM2       | -      |
| hsa-miR-655 | LRRTM3       | LRRTM3       | -      |
| hsa-miR-655 | -            | LSM14B       | LSM14B |
| hsa-miR-655 | LSM5         | LSM5         | -      |
| hsa-miR-655 | LUC7L3       | LUC7L3       | -      |
| hsa-miR-655 | LUZP2        | LUZP2        | -      |

|             |           |           |       |
|-------------|-----------|-----------|-------|
| hsa-miR-655 | LY75      | LY75      | -     |
| hsa-miR-655 | LYN       | LYN       | -     |
| hsa-miR-655 | LYPLA1    | LYPLA1    | -     |
| hsa-miR-655 | LYPLAL1   | LYPLAL1   | -     |
| hsa-miR-655 | LYSMD3    | LYSMD3    | -     |
| hsa-miR-655 | LZTFL1    | LZTFL1    | -     |
| hsa-miR-655 | MACC1     | MACC1     | -     |
| hsa-miR-655 | MACF1     | MACF1     | -     |
| hsa-miR-655 | MAFB      | MAFB      | -     |
| hsa-miR-655 | MAGI2     | MAGI2     | -     |
| hsa-miR-655 | MAGT1     | MAGT1     | -     |
| hsa-miR-655 | MAL2      | MAL2      | -     |
| hsa-miR-655 | MALT1     | MALT1     | -     |
| hsa-miR-655 | MAMDC2    | MAMDC2    | -     |
| hsa-miR-655 | MAN1A2    | MAN1A2    | -     |
| hsa-miR-655 | MANBAL    | MANBAL    | -     |
| hsa-miR-655 | MAP2K4    | MAP2K4    | -     |
| hsa-miR-655 | MAP2K5    | MAP2K5    | -     |
| hsa-miR-655 | MAP4      | MAP4      | -     |
| hsa-miR-655 | MAP4K2    | MAP4K2    | -     |
| hsa-miR-655 | MAP4K3    | MAP4K3    | -     |
| hsa-miR-655 | MAP4K4    | MAP4K4    | -     |
| hsa-miR-655 | MAP7D2    | MAP7D2    | -     |
| hsa-miR-655 | MAP9      | MAP9      | -     |
| hsa-miR-655 | MAPK14    | MAPK14    | -     |
| hsa-miR-655 | MAPK1IP1L | MAPK1IP1L | -     |
| hsa-miR-655 | MAPRE1    | MAPRE1    | -     |
| hsa-miR-655 | MARCH1    | MARCH1    | -     |
| hsa-miR-655 | MARCH5    | MARCH5    | -     |
| hsa-miR-655 | MARCH6    | MARCH6    | -     |
| hsa-miR-655 | MARK4     | MARK4     | -     |
| hsa-miR-655 | MASP1     | MASP1     | -     |
| hsa-miR-655 | MAST4     | MAST4     | -     |
| hsa-miR-655 | -         | MASTL     | MASTL |
| hsa-miR-655 | MATN3     | MATN3     | -     |
| hsa-miR-655 | MBD1      | MBD1      | -     |
| hsa-miR-655 | MBD2      | MBD2      | -     |
| hsa-miR-655 | MBL2      | MBL2      | -     |
| hsa-miR-655 | MBLAC2    | MBLAC2    | -     |
| hsa-miR-655 | MBNL2     | MBNL2     | -     |
| hsa-miR-655 | MBP       | MBP       | -     |
| hsa-miR-655 | MBTD1     | MBTD1     | -     |
| hsa-miR-655 | MBTPS2    | MBTPS2    | -     |
| hsa-miR-655 | MC2R      | MC2R      | -     |
| hsa-miR-655 | MCFD2     | MCFD2     | -     |
| hsa-miR-655 | -         | MCM8      | MCM8  |
| hsa-miR-655 | MCTP2     | MCTP2     | -     |
| hsa-miR-655 | MDC1      | MDC1      | -     |
| hsa-miR-655 | MDFIC     | MDFIC     | -     |
| hsa-miR-655 | MDGA2     | MDGA2     | -     |
| hsa-miR-655 | MDM4      | MDM4      | -     |

|             |         |         |         |
|-------------|---------|---------|---------|
| hsa-miR-655 | ME1     | ME1     | -       |
| hsa-miR-655 | MED10   | MED10   | -       |
| hsa-miR-655 | MED13   | MED13   | -       |
| hsa-miR-655 | MED14   | MED14   | -       |
| hsa-miR-655 | MED18   | MED18   | -       |
| hsa-miR-655 | MED31   | MED31   | -       |
| hsa-miR-655 | MEF2A   | MEF2A   | -       |
| hsa-miR-655 | MEGF10  | MEGF10  | -       |
| hsa-miR-655 | MEIS1   | MEIS1   | -       |
| hsa-miR-655 | MEMO1   | MEMO1   | -       |
| hsa-miR-655 | MEOX2   | MEOX2   | -       |
| hsa-miR-655 | MEPE    | -       | MEPE    |
| hsa-miR-655 | MEST    | MEST    | -       |
| hsa-miR-655 | METAP2  | METAP2  | -       |
| hsa-miR-655 | -       | METTTL3 | METTTL3 |
| hsa-miR-655 | METTTL4 | METTTL4 | -       |
| hsa-miR-655 | METTTL6 | METTTL6 | -       |
| hsa-miR-655 | MEX3A   | MEX3A   | -       |
| hsa-miR-655 | MEX3B   | MEX3B   | -       |
| hsa-miR-655 | MFAP3   | MFAP3   | -       |
| hsa-miR-655 | MFN1    | MFN1    | -       |
| hsa-miR-655 | MGAT2   | MGAT2   | -       |
| hsa-miR-655 | MIB1    | MIB1    | -       |
| hsa-miR-655 | MICALL1 | MICALL1 | -       |
| hsa-miR-655 | MID1    | MID1    | -       |
| hsa-miR-655 | MID2    | MID2    | -       |
| hsa-miR-655 | MIER1   | MIER1   | -       |
| hsa-miR-655 | MITF    | MITF    | -       |
| hsa-miR-655 | MKRN2   | MKRN2   | -       |
| hsa-miR-655 | MKX     | MKX     | -       |
| hsa-miR-655 | MLLT10  | MLLT10  | -       |
| hsa-miR-655 | MLLT3   | MLLT3   | -       |
| hsa-miR-655 | MMD     | MMD     | -       |
| hsa-miR-655 | MMP13   | MMP13   | -       |
| hsa-miR-655 | MMP16   | MMP16   | -       |
| hsa-miR-655 | -       | MMP7    | MMP7    |
| hsa-miR-655 | MOBKL2B | MOBKL2B | -       |
| hsa-miR-655 | MOBKL3  | MOBKL3  | -       |
| hsa-miR-655 | MON2    | MON2    | -       |
| hsa-miR-655 | MOXD1   | MOXD1   | -       |
| hsa-miR-655 | MPP5    | MPP5    | -       |
| hsa-miR-655 | MPP7    | MPP7    | -       |
| hsa-miR-655 | MPPED2  | MPPED2  | -       |
| hsa-miR-655 | MPRIP   | MPRIP   | -       |
| hsa-miR-655 | MR1     | MR1     | -       |
| hsa-miR-655 | MRAP2   | MRAP2   | -       |
| hsa-miR-655 | MRO     | MRO     | -       |
| hsa-miR-655 | MRPL10  | MRPL10  | -       |
| hsa-miR-655 | -       | MRPL39  | MRPL39  |
| hsa-miR-655 | MRPL50  | MRPL50  | -       |
| hsa-miR-655 | MRPS10  | MRPS10  | -       |

|             |          |          |       |
|-------------|----------|----------|-------|
| hsa-miR-655 | MRPS14   | MRPS14   | -     |
| hsa-miR-655 | MRPS6    | MRPS6    | -     |
| hsa-miR-655 | MRS2     | MRS2     | -     |
| hsa-miR-655 | MS4A2    | MS4A2    | -     |
| hsa-miR-655 | MS4A7    | MS4A7    | -     |
| hsa-miR-655 | MSL2     | MSL2     | -     |
| hsa-miR-655 | MSR1     | MSR1     | -     |
| hsa-miR-655 | MTDH     | MTDH     | -     |
| hsa-miR-655 | MTL5     | MTL5     | -     |
| hsa-miR-655 | MTM1     | MTM1     | -     |
| hsa-miR-655 | MTMR12   | MTMR12   | -     |
| hsa-miR-655 | MTMR2    | MTMR2    | -     |
| hsa-miR-655 | MTRF1L   | MTRF1L   | -     |
| hsa-miR-655 | MTUS1    | MTUS1    | -     |
| hsa-miR-655 | -        | MTX2     | MTX2  |
| hsa-miR-655 | MUC15    | MUC15    | -     |
| hsa-miR-655 | MUC20    | MUC20    | -     |
| hsa-miR-655 | MUT      | MUT      | -     |
| hsa-miR-655 | MXI1     | MXI1     | -     |
| hsa-miR-655 | MYF5     | MYF5     | -     |
| hsa-miR-655 | MYLK3    | MYLK3    | -     |
| hsa-miR-655 | MYLK4    | MYLK4    | -     |
| hsa-miR-655 | MYO10    | -        | MYO10 |
| hsa-miR-655 | MYO5A    | MYO5A    | -     |
| hsa-miR-655 | MYO5B    | MYO5B    | -     |
| hsa-miR-655 | MYO6     | MYO6     | -     |
| hsa-miR-655 | MYOF     | MYOF     | -     |
| hsa-miR-655 | MYOT     | MYOT     | -     |
| hsa-miR-655 | MYOZ3    | MYOZ3    | -     |
| hsa-miR-655 | MYSM1    | MYSM1    | -     |
| hsa-miR-655 | N4BP2    | N4BP2    | -     |
| hsa-miR-655 | N6AMT1   | N6AMT1   | -     |
| hsa-miR-655 | NAA15    | NAA15    | -     |
| hsa-miR-655 | NAA16    | NAA16    | -     |
| hsa-miR-655 | NAAA     | NAAA     | -     |
| hsa-miR-655 | NAALADL2 | NAALADL2 | -     |
| hsa-miR-655 | NAB1     | NAB1     | -     |
| hsa-miR-655 | NADK     | NADK     | -     |
| hsa-miR-655 | NAMPT    | NAMPT    | -     |
| hsa-miR-655 | NANOS1   | NANOS1   | -     |
| hsa-miR-655 | NANP     | NANP     | -     |
| hsa-miR-655 | NAP1L5   | NAP1L5   | -     |
| hsa-miR-655 | NAV3     | NAV3     | -     |
| hsa-miR-655 | NCAPG    | NCAPG    | -     |
| hsa-miR-655 | NCOA1    | NCOA1    | -     |
| hsa-miR-655 | NCOA2    | NCOA2    | -     |
| hsa-miR-655 | NCOA3    | NCOA3    | -     |
| hsa-miR-655 | NCOA4    | NCOA4    | -     |
| hsa-miR-655 | -        | NCOA6    | NCOA6 |
| hsa-miR-655 | -        | NDC80    | NDC80 |
| hsa-miR-655 | NDEL1    | NDEL1    | -     |

|             |           |           |        |
|-------------|-----------|-----------|--------|
| hsa-miR-655 | NDFIP1    | NDFIP1    | -      |
| hsa-miR-655 | NDFIP2    | NDFIP2    | -      |
| hsa-miR-655 | NDRG1     | NDRG1     | -      |
| hsa-miR-655 | NDST3     | NDST3     | -      |
| hsa-miR-655 | NDUFA5    | NDUFA5    | -      |
| hsa-miR-655 | NDUFB5    | NDUFB5    | -      |
| hsa-miR-655 | NDUFC2    | NDUFC2    | -      |
| hsa-miR-655 | NEBL      | NEBL      | -      |
| hsa-miR-655 | NECAB1    | NECAB1    | -      |
| hsa-miR-655 | NECAP2    | NECAP2    | -      |
| hsa-miR-655 | NEDD4     | NEDD4     | -      |
| hsa-miR-655 | NEDD9     | NEDD9     | -      |
| hsa-miR-655 | -         | NEK11     | NEK11  |
| hsa-miR-655 | NEK7      | NEK7      | -      |
| hsa-miR-655 | NEUROD6   | NEUROD6   | -      |
| hsa-miR-655 | NF1       | NF1       | -      |
| hsa-miR-655 | NFE2L3    | NFE2L3    | -      |
| hsa-miR-655 | NFIA      | NFIA      | -      |
| hsa-miR-655 | NFIB      | NFIB      | -      |
| hsa-miR-655 | -         | NFKBIA    | NFKBIA |
| hsa-miR-655 | NFYA      | NFYA      | -      |
| hsa-miR-655 | NFYB      | NFYB      | -      |
| hsa-miR-655 | NHLH2     | NHLH2     | -      |
| hsa-miR-655 | NIN       | NIN       | -      |
| hsa-miR-655 | NIPA1     | NIPA1     | -      |
| hsa-miR-655 | NIPSNAP3B | NIPSNAP3B | -      |
| hsa-miR-655 | NKAIN2    | NKAIN2    | -      |
| hsa-miR-655 | NKRF      | NKRF      | -      |
| hsa-miR-655 | NKTR      | NKTR      | -      |
| hsa-miR-655 | NKX3-2    | NKX3-2    | -      |
| hsa-miR-655 | NLRP1     | NLRP1     | -      |
| hsa-miR-655 | NLRP11    | NLRP11    | -      |
| hsa-miR-655 | -         | NLRP3     | NLRP3  |
| hsa-miR-655 | NLRP8     | NLRP8     | -      |
| hsa-miR-655 | NOL10     | NOL10     | -      |
| hsa-miR-655 | -         | NOL11     | NOL11  |
| hsa-miR-655 | NOM1      | NOM1      | -      |
| hsa-miR-655 | NOV       | NOV       | -      |
| hsa-miR-655 | NPAT      | NPAT      | -      |
| hsa-miR-655 | NPHP3     | NPHP3     | -      |
| hsa-miR-655 | NPTX1     | NPTX1     | -      |
| hsa-miR-655 | NPY1R     | NPY1R     | -      |
| hsa-miR-655 | NPY2R     | NPY2R     | -      |
| hsa-miR-655 | NR2F2     | NR2F2     | -      |
| hsa-miR-655 | NR3C1     | NR3C1     | -      |
| hsa-miR-655 | NR3C2     | NR3C2     | -      |
| hsa-miR-655 | NR4A3     | NR4A3     | -      |
| hsa-miR-655 | NR5A2     | NR5A2     | -      |
| hsa-miR-655 | NRAS      | NRAS      | -      |
| hsa-miR-655 | NRBP2     | NRBP2     | -      |
| hsa-miR-655 | NRCAM     | NRCAM     | -      |

|             |             |             |         |
|-------------|-------------|-------------|---------|
| hsa-miR-655 | NRG1        | NRG1        | -       |
| hsa-miR-655 | NRP2        | NRP2        | -       |
| hsa-miR-655 | NRXN1       | NRXN1       | -       |
| hsa-miR-655 | NT5C2       | NT5C2       | -       |
| hsa-miR-655 | NT5DC1      | NT5DC1      | -       |
| hsa-miR-655 | NTN1        | NTN1        | -       |
| hsa-miR-655 | NTNG1       | NTNG1       | -       |
| hsa-miR-655 | NTNG2       | NTNG2       | -       |
| hsa-miR-655 | NUAK1       | NUAK1       | -       |
| hsa-miR-655 | NUBPL       | NUBPL       | -       |
| hsa-miR-655 | NUCKS1      | NUCKS1      | -       |
| hsa-miR-655 | NUDT11      | NUDT11      | -       |
| hsa-miR-655 | NUDT12      | NUDT12      | -       |
| hsa-miR-655 | NUDT19      | NUDT19      | -       |
| hsa-miR-655 | NUDT21      | NUDT21      | -       |
| hsa-miR-655 | NUMBL       | NUMBL       | -       |
| hsa-miR-655 | NUP153      | NUP153      | -       |
| hsa-miR-655 | NUP160      | NUP160      | -       |
| hsa-miR-655 | NUP43       | NUP43       | -       |
| hsa-miR-655 | NUP50       | NUP50       | -       |
| hsa-miR-655 | NUP93       | NUP93       | -       |
| hsa-miR-655 | OAS1        | OAS1        | -       |
| hsa-miR-655 | OAZ1        | -           | OAZ1    |
| hsa-miR-655 | OBFC2A      | OBFC2A      | -       |
| hsa-miR-655 | OCIAD1      | OCIAD1      | -       |
| hsa-miR-655 | OCLN        | OCLN        | -       |
| hsa-miR-655 | ODZ1        | ODZ1        | -       |
| hsa-miR-655 | ODZ3        | ODZ3        | -       |
| hsa-miR-655 | -           | OLFML2B     | OLFML2B |
| hsa-miR-655 | OLR1        | OLR1        | -       |
| hsa-miR-655 | OPA1        | OPA1        | -       |
| hsa-miR-655 | OPN5        | OPN5        | -       |
| hsa-miR-655 | OPTN        | OPTN        | -       |
| hsa-miR-655 | OR11A1      | OR11A1      | -       |
| hsa-miR-655 | ORAOV1      | ORAOV1      | -       |
| hsa-miR-655 | OSBPL10     | OSBPL10     | -       |
| hsa-miR-655 | OSGIN2      | OSGIN2      | -       |
| hsa-miR-655 | OSTC        | OSTC        | -       |
| hsa-miR-655 | OTOR        | OTOR        | -       |
| hsa-miR-655 | OTUD3       | OTUD3       | -       |
| hsa-miR-655 | OTUD4       | OTUD4       | -       |
| hsa-miR-655 | OTX1        | OTX1        | -       |
| hsa-miR-655 | P2RY12      | P2RY12      | -       |
| hsa-miR-655 | PABPC1L     | PABPC1L     | -       |
| hsa-miR-655 | PABPC4L     | PABPC4L     | -       |
| hsa-miR-655 | PABPC5      | PABPC5      | -       |
| hsa-miR-655 | PAH         | PAH         | -       |
| hsa-miR-655 | PAICS       | PAICS       | -       |
| hsa-miR-655 | PAK7        | PAK7        | -       |
| hsa-miR-655 | PALLD       | PALLD       | -       |
| hsa-miR-655 | PALM2-AKAP2 | PALM2-AKAP2 | -       |

|             |         |         |   |
|-------------|---------|---------|---|
| hsa-miR-655 | PAN3    | PAN3    | - |
| hsa-miR-655 | PAPD4   | PAPD4   | - |
| hsa-miR-655 | PAPPA2  | PAPPA2  | - |
| hsa-miR-655 | PAPSS2  | PAPSS2  | - |
| hsa-miR-655 | PAQR5   | PAQR5   | - |
| hsa-miR-655 | PARD6G  | PARD6G  | - |
| hsa-miR-655 | PARP9   | PARP9   | - |
| hsa-miR-655 | PATE4   | PATE4   | - |
| hsa-miR-655 | PATZ1   | PATZ1   | - |
| hsa-miR-655 | PAX4    | PAX4    | - |
| hsa-miR-655 | PAX6    | PAX6    | - |
| hsa-miR-655 | PBLD    | PBLD    | - |
| hsa-miR-655 | PBX1    | PBX1    | - |
| hsa-miR-655 | PBX3    | PBX3    | - |
| hsa-miR-655 | PCDH11X | PCDH11X | - |
| hsa-miR-655 | PCDH11Y | PCDH11Y | - |
| hsa-miR-655 | PCDH17  | PCDH17  | - |
| hsa-miR-655 | PCDH18  | PCDH18  | - |
| hsa-miR-655 | PCDH7   | PCDH7   | - |
| hsa-miR-655 | PCDHA1  | PCDHA1  | - |
| hsa-miR-655 | PCDHA10 | PCDHA10 | - |
| hsa-miR-655 | PCDHA11 | PCDHA11 | - |
| hsa-miR-655 | PCDHA12 | PCDHA12 | - |
| hsa-miR-655 | PCDHA13 | PCDHA13 | - |
| hsa-miR-655 | PCDHA2  | PCDHA2  | - |
| hsa-miR-655 | PCDHA3  | PCDHA3  | - |
| hsa-miR-655 | PCDHA4  | PCDHA4  | - |
| hsa-miR-655 | PCDHA6  | PCDHA6  | - |
| hsa-miR-655 | PCDHA7  | PCDHA7  | - |
| hsa-miR-655 | PCDHA8  | PCDHA8  | - |
| hsa-miR-655 | PCDHA9  | PCDHA9  | - |
| hsa-miR-655 | PCDHAC1 | PCDHAC1 | - |
| hsa-miR-655 | PCDHAC2 | PCDHAC2 | - |
| hsa-miR-655 | PCDHB14 | PCDHB14 | - |
| hsa-miR-655 | PCDHB16 | PCDHB16 | - |
| hsa-miR-655 | PCDHB5  | PCDHB5  | - |
| hsa-miR-655 | PCGF3   | PCGF3   | - |
| hsa-miR-655 | PCLO    | PCLO    | - |
| hsa-miR-655 | PCMTD2  | PCMTD2  | - |
| hsa-miR-655 | PCNX    | PCNX    | - |
| hsa-miR-655 | PCSK2   | PCSK2   | - |
| hsa-miR-655 | PCYOX1  | PCYOX1  | - |
| hsa-miR-655 | PDCD2   | PDCD2   | - |
| hsa-miR-655 | PDE10A  | PDE10A  | - |
| hsa-miR-655 | PDE11A  | PDE11A  | - |
| hsa-miR-655 | PDE12   | PDE12   | - |
| hsa-miR-655 | PDE3B   | PDE3B   | - |
| hsa-miR-655 | PDE4A   | PDE4A   | - |
| hsa-miR-655 | PDE4B   | PDE4B   | - |
| hsa-miR-655 | PDE4D   | PDE4D   | - |
| hsa-miR-655 | PDE5A   | PDE5A   | - |



|             |         |         |         |
|-------------|---------|---------|---------|
| hsa-miR-655 | PDE7A   | PDE7A   | -       |
| hsa-miR-655 | PDGFA   | PDGFA   | -       |
| hsa-miR-655 | PDGFC   | PDGFC   | -       |
| hsa-miR-655 | PDGFRA  | PDGFRA  | -       |
| hsa-miR-655 | PDIK1L  | PDIK1L  | -       |
| hsa-miR-655 | PDK1    | PDK1    | -       |
| hsa-miR-655 | PDLIM5  | PDLIM5  | -       |
| hsa-miR-655 | PDP1    | PDP1    | -       |
| hsa-miR-655 | PDPR    | PDPR    | -       |
| hsa-miR-655 | PDS5A   | PDS5A   | -       |
| hsa-miR-655 | PDS5B   | PDS5B   | -       |
| hsa-miR-655 | PDZD2   | PDZD2   | -       |
| hsa-miR-655 | PEG10   | PEG10   | -       |
| hsa-miR-655 | PELI1   | PELI1   | -       |
| hsa-miR-655 | PELI2   | PELI2   | -       |
| hsa-miR-655 | PER3    | PER3    | -       |
| hsa-miR-655 | -       | PET112L | PET112L |
| hsa-miR-655 | PEX13   | PEX13   | -       |
| hsa-miR-655 | PEX2    | PEX2    | -       |
| hsa-miR-655 | PF4V1   | PF4V1   | -       |
| hsa-miR-655 | PGAM1   | PGAM1   | -       |
| hsa-miR-655 | PGAP1   | PGAP1   | -       |
| hsa-miR-655 | PGM2    | PGM2    | -       |
| hsa-miR-655 | PGM2L1  | PGM2L1  | -       |
| hsa-miR-655 | PGP     | PGP     | -       |
| hsa-miR-655 | PHC3    | PHC3    | -       |
| hsa-miR-655 | PHF13   | PHF13   | -       |
| hsa-miR-655 | PHF15   | PHF15   | -       |
| hsa-miR-655 | PHF16   | PHF16   | -       |
| hsa-miR-655 | PHF17   | PHF17   | -       |
| hsa-miR-655 | PHF20   | PHF20   | -       |
| hsa-miR-655 | PHF20L1 | PHF20L1 | -       |
| hsa-miR-655 | PHF21B  | PHF21B  | -       |
| hsa-miR-655 | PHF6    | PHF6    | -       |
| hsa-miR-655 | PHIP    | PHIP    | -       |
| hsa-miR-655 | PHLDB2  | PHLDB2  | -       |
| hsa-miR-655 | PHLPP2  | PHLPP2  | -       |
| hsa-miR-655 | PHTF2   | PHTF2   | -       |
| hsa-miR-655 | PI15    | PI15    | -       |
| hsa-miR-655 | PI4K2B  | PI4K2B  | -       |
| hsa-miR-655 | PIGA    | PIGA    | -       |
| hsa-miR-655 | PIGH    | PIGH    | -       |
| hsa-miR-655 | PIGK    | PIGK    | -       |
| hsa-miR-655 | PIGM    | PIGM    | -       |
| hsa-miR-655 | PIGN    | PIGN    | -       |
| hsa-miR-655 | PIK3AP1 | PIK3AP1 | -       |
| hsa-miR-655 | PIK3C2A | PIK3C2A | -       |
| hsa-miR-655 | PIK3C2G | PIK3C2G | -       |
| hsa-miR-655 | PIK3R1  | PIK3R1  | -       |
| hsa-miR-655 | -       | PIK3R4  | PIK3R4  |
| hsa-miR-655 | PIKFYVE | PIKFYVE | -       |

|             |          |          |      |
|-------------|----------|----------|------|
| hsa-miR-655 | PILRB    | PILRB    | -    |
| hsa-miR-655 | PJA2     | PJA2     | -    |
| hsa-miR-655 | PKD1L1   | PKD1L1   | -    |
| hsa-miR-655 | PKD2     | PKD2     | -    |
| hsa-miR-655 | PLA2G12A | PLA2G12A | -    |
| hsa-miR-655 | PLA2G5   | PLA2G5   | -    |
| hsa-miR-655 | PLAA     | PLAA     | -    |
| hsa-miR-655 | PLAGL2   | PLAGL2   | -    |
| hsa-miR-655 | PLCB1    | PLCB1    | -    |
| hsa-miR-655 | PLCL1    | PLCL1    | -    |
| hsa-miR-655 | PLD1     | PLD1     | -    |
| hsa-miR-655 | PLD5     | PLD5     | -    |
| hsa-miR-655 | PLDN     | PLDN     | -    |
| hsa-miR-655 | PLEKHA1  | PLEKHA1  | -    |
| hsa-miR-655 | PLEKHA5  | PLEKHA5  | -    |
| hsa-miR-655 | PLEKHG1  | PLEKHG1  | -    |
| hsa-miR-655 | PLEKHH2  | PLEKHH2  | -    |
| hsa-miR-655 | PLG      | PLG      | -    |
| hsa-miR-655 | PLGLB1   | PLGLB1   | -    |
| hsa-miR-655 | PLGLB2   | PLGLB2   | -    |
| hsa-miR-655 | -        | PLK4     | PLK4 |
| hsa-miR-655 | PLN      | PLN      | -    |
| hsa-miR-655 | PLS1     | PLS1     | -    |
| hsa-miR-655 | PLXNA2   | PLXNA2   | -    |
| hsa-miR-655 | PMAIP1   | PMAIP1   | -    |
| hsa-miR-655 | PMEPA1   | PMEPA1   | -    |
| hsa-miR-655 | PMP2     | PMP2     | -    |
| hsa-miR-655 | PNMAL1   | PNMAL1   | -    |
| hsa-miR-655 | PNN      | PNN      | -    |
| hsa-miR-655 | PNPLA3   | PNPLA3   | -    |
| hsa-miR-655 | PNPLA4   | PNPLA4   | -    |
| hsa-miR-655 | PNRC2    | PNRC2    | -    |
| hsa-miR-655 | POLDIP3  | POLDIP3  | -    |
| hsa-miR-655 | POLI     | POLI     | -    |
| hsa-miR-655 | POU4F2   | POU4F2   | -    |
| hsa-miR-655 | PPAP2B   | PPAP2B   | -    |
| hsa-miR-655 | PPARD    | PPARD    | -    |
| hsa-miR-655 | PPBP     | PPBP     | -    |
| hsa-miR-655 | PPHLN1   | PPHLN1   | -    |
| hsa-miR-655 | PPIA     | PPIA     | -    |
| hsa-miR-655 | PPM1A    | PPM1A    | -    |
| hsa-miR-655 | PPP1CB   | PPP1CB   | -    |
| hsa-miR-655 | PPP1R12A | PPP1R12A | -    |
| hsa-miR-655 | PPP1R3C  | PPP1R3C  | -    |
| hsa-miR-655 | PPP1R3D  | PPP1R3D  | -    |
| hsa-miR-655 | PPP1R8   | PPP1R8   | -    |
| hsa-miR-655 | PPP2R5D  | PPP2R5D  | -    |
| hsa-miR-655 | PPP2R5E  | PPP2R5E  | -    |
| hsa-miR-655 | PPP3CA   | PPP3CA   | -    |
| hsa-miR-655 | PPP4R1   | PPP4R1   | -    |
| hsa-miR-655 | PPP6C    | PPP6C    | -    |

|             |          |          |          |
|-------------|----------|----------|----------|
| hsa-miR-655 | PRAMEF18 | PRAMEF18 | -        |
| hsa-miR-655 | PRDM1    | PRDM1    | -        |
| hsa-miR-655 | PRDM2    | PRDM2    | -        |
| hsa-miR-655 | PRDM7    | PRDM7    | -        |
| hsa-miR-655 | PRDX3    | PRDX3    | -        |
| hsa-miR-655 | PREPL    | PREPL    | -        |
| hsa-miR-655 | -        | PRICKLE1 | PRICKLE1 |
| hsa-miR-655 | PRICKLE2 | PRICKLE2 | -        |
| hsa-miR-655 | PRKAA1   | PRKAA1   | -        |
| hsa-miR-655 | PRKACB   | PRKACB   | -        |
| hsa-miR-655 | -        | PRKAG2   | PRKAG2   |
| hsa-miR-655 | PRKD1    | PRKD1    | -        |
| hsa-miR-655 | PRNP     | PRNP     | -        |
| hsa-miR-655 | PROM2    | PROM2    | -        |
| hsa-miR-655 | PROSC    | PROSC    | -        |
| hsa-miR-655 | PRPF4B   | PRPF4B   | -        |
| hsa-miR-655 | PRR18    | PRR18    | -        |
| hsa-miR-655 | PRR20A   | PRR20A   | -        |
| hsa-miR-655 | PRRX1    | PRRX1    | -        |
| hsa-miR-655 | PRSS23   | PRSS23   | -        |
| hsa-miR-655 | PSEN1    | PSEN1    | -        |
| hsa-miR-655 | PSIP1    | PSIP1    | -        |
| hsa-miR-655 | -        | PSMC6    | PSMC6    |
| hsa-miR-655 | PTBP1    | PTBP1    | -        |
| hsa-miR-655 | PTBP2    | PTBP2    | -        |
| hsa-miR-655 | PTCH1    | PTCH1    | -        |
| hsa-miR-655 | PTER     | PTER     | -        |
| hsa-miR-655 | PTGDR    | PTGDR    | -        |
| hsa-miR-655 | PTGER3   | PTGER3   | -        |
| hsa-miR-655 | PTGS2    | PTGS2    | -        |
| hsa-miR-655 | PTHLH    | PTHLH    | -        |
| hsa-miR-655 | PTP4A1   | PTP4A1   | -        |
| hsa-miR-655 | PTPDC1   | PTPDC1   | -        |
| hsa-miR-655 | PTPN1    | PTPN1    | -        |
| hsa-miR-655 | PTPN11   | PTPN11   | -        |
| hsa-miR-655 | -        | PTPN2    | PTPN2    |
| hsa-miR-655 | -        | PTPN4    | PTPN4    |
| hsa-miR-655 | PTPN5    | PTPN5    | -        |
| hsa-miR-655 | PTPN9    | PTPN9    | -        |
| hsa-miR-655 | PTPRC    | PTPRC    | -        |
| hsa-miR-655 | PTPRE    | PTPRE    | -        |
| hsa-miR-655 | PTPRJ    | PTPRJ    | -        |
| hsa-miR-655 | PTPRS    | PTPRS    | -        |
| hsa-miR-655 | PTS      | PTS      | -        |
| hsa-miR-655 | PTTG1IP  | PTTG1IP  | -        |
| hsa-miR-655 | PVRL1    | PVRL1    | -        |
| hsa-miR-655 | PWWP2A   | PWWP2A   | -        |
| hsa-miR-655 | PXMP4    | PXMP4    | -        |
| hsa-miR-655 | PYGB     | PYGB     | -        |
| hsa-miR-655 | PYHIN1   | PYHIN1   | -        |
| hsa-miR-655 | QKI      | QKI      | -        |

|             |          |          |       |
|-------------|----------|----------|-------|
| hsa-miR-655 | QSER1    | QSER1    | -     |
| hsa-miR-655 | RAB10    | RAB10    | -     |
| hsa-miR-655 | RAB11A   | RAB11A   | -     |
| hsa-miR-655 | RAB14    | RAB14    | -     |
| hsa-miR-655 | RAB27A   | RAB27A   | -     |
| hsa-miR-655 | RAB2A    | RAB2A    | -     |
| hsa-miR-655 | RAB31    | RAB31    | -     |
| hsa-miR-655 | RAB39    | RAB39    | -     |
| hsa-miR-655 | RAB3GAP1 | RAB3GAP1 | -     |
| hsa-miR-655 | RAB3GAP2 | RAB3GAP2 | -     |
| hsa-miR-655 | RAB5A    | RAB5A    | -     |
| hsa-miR-655 | RAB5B    | RAB5B    | -     |
| hsa-miR-655 | RAB6A    | RAB6A    | -     |
| hsa-miR-655 | RAB6C    | RAB6C    | -     |
| hsa-miR-655 | RAB7L1   | RAB7L1   | -     |
| hsa-miR-655 | RABGAP1  | RABGAP1  | -     |
| hsa-miR-655 | RAC1     | RAC1     | -     |
| hsa-miR-655 | RAD23B   | RAD23B   | -     |
| hsa-miR-655 | RAD51    | RAD51    | -     |
| hsa-miR-655 | RAG1     | RAG1     | -     |
| hsa-miR-655 | RALGAPA1 | RALGAPA1 | -     |
| hsa-miR-655 | RANBP2   | RANBP2   | -     |
| hsa-miR-655 | RAP2A    | RAP2A    | -     |
| hsa-miR-655 | RAP2C    | RAP2C    | -     |
| hsa-miR-655 | RAPGEF5  | RAPGEF5  | -     |
| hsa-miR-655 | RARA     | -        | RARA  |
| hsa-miR-655 | RASGRP1  | RASGRP1  | -     |
| hsa-miR-655 | RASSF5   | RASSF5   | -     |
| hsa-miR-655 | RASSF6   | RASSF6   | -     |
| hsa-miR-655 | RASSF8   | RASSF8   | -     |
| hsa-miR-655 | RBAK     | RBAK     | -     |
| hsa-miR-655 | RBBP9    | RBBP9    | -     |
| hsa-miR-655 | RBL2     | RBL2     | -     |
| hsa-miR-655 | RBM11    | RBM11    | -     |
| hsa-miR-655 | RBM18    | RBM18    | -     |
| hsa-miR-655 | RBM24    | RBM24    | -     |
| hsa-miR-655 | RBM27    | RBM27    | -     |
| hsa-miR-655 | RBM41    | RBM41    | -     |
| hsa-miR-655 | RBM7     | RBM7     | -     |
| hsa-miR-655 | RBMXL1   | RBMXL1   | -     |
| hsa-miR-655 | RCAN1    | RCAN1    | -     |
| hsa-miR-655 | RCHY1    | RCHY1    | -     |
| hsa-miR-655 | RCL1     | RCL1     | -     |
| hsa-miR-655 | RDH10    | RDH10    | -     |
| hsa-miR-655 | -        | RDH5     | RDH5  |
| hsa-miR-655 | RDX      | RDX      | -     |
| hsa-miR-655 | RECK     | RECK     | -     |
| hsa-miR-655 | REEP1    | REEP1    | -     |
| hsa-miR-655 | RELL1    | RELL1    | -     |
| hsa-miR-655 | REP15    | REP15    | -     |
| hsa-miR-655 | -        | REPS1    | REPS1 |

|             |          |          |      |
|-------------|----------|----------|------|
| hsa-miR-655 | RFC5     | RFC5     | -    |
| hsa-miR-655 | RFFL     | RFFL     | -    |
| hsa-miR-655 | RFT1     | RFT1     | -    |
| hsa-miR-655 | RFTN2    | RFTN2    | -    |
| hsa-miR-655 | RG9MTD2  | RG9MTD2  | -    |
| hsa-miR-655 | RGMB     | RGMB     | -    |
| hsa-miR-655 | RGPD3    | RGPD3    | -    |
| hsa-miR-655 | RGPD4    | RGPD4    | -    |
| hsa-miR-655 | RGPD5    | RGPD5    | -    |
| hsa-miR-655 | RGPD6    | RGPD6    | -    |
| hsa-miR-655 | RGPD8    | RGPD8    | -    |
| hsa-miR-655 | RGS7BP   | RGS7BP   | -    |
| hsa-miR-655 | RHBDD1   | RHBDD1   | -    |
| hsa-miR-655 | RHOBTB1  | RHOBTB1  | -    |
| hsa-miR-655 | RHOJ     | RHOJ     | -    |
| hsa-miR-655 | RHOQ     | RHOQ     | -    |
| hsa-miR-655 | RHOU     | RHOU     | -    |
| hsa-miR-655 | RIC3     | -        | RIC3 |
| hsa-miR-655 | RILPL2   | RILPL2   | -    |
| hsa-miR-655 | RIMKLB   | RIMKLB   | -    |
| hsa-miR-655 | RIT1     | RIT1     | -    |
| hsa-miR-655 | RNF11    | RNF11    | -    |
| hsa-miR-655 | RNF111   | RNF111   | -    |
| hsa-miR-655 | RNF114   | RNF114   | -    |
| hsa-miR-655 | RNF13    | RNF13    | -    |
| hsa-miR-655 | RNF133   | RNF133   | -    |
| hsa-miR-655 | RNF141   | RNF141   | -    |
| hsa-miR-655 | RNF146   | RNF146   | -    |
| hsa-miR-655 | RNF180   | RNF180   | -    |
| hsa-miR-655 | RNF2     | RNF2     | -    |
| hsa-miR-655 | RNF213   | RNF213   | -    |
| hsa-miR-655 | RNF38    | RNF38    | -    |
| hsa-miR-655 | RNF44    | RNF44    | -    |
| hsa-miR-655 | -        | RNF6     | RNF6 |
| hsa-miR-655 | RNF8     | RNF8     | -    |
| hsa-miR-655 | RNFT1    | RNFT1    | -    |
| hsa-miR-655 | ROCK2    | ROCK2    | -    |
| hsa-miR-655 | ROD1     | ROD1     | -    |
| hsa-miR-655 | RP2      | RP2      | -    |
| hsa-miR-655 | RPAP2    | RPAP2    | -    |
| hsa-miR-655 | RPAP3    | RPAP3    | -    |
| hsa-miR-655 | RPE65    | RPE65    | -    |
| hsa-miR-655 | RPGRIP1L | RPGRIP1L | -    |
| hsa-miR-655 | RPL38    | RPL38    | -    |
| hsa-miR-655 | RPP30    | RPP30    | -    |
| hsa-miR-655 | RPRD1A   | RPRD1A   | -    |
| hsa-miR-655 | RPRD2    | RPRD2    | -    |
| hsa-miR-655 | RPS17    | RPS17    | -    |
| hsa-miR-655 | RPS6KA3  | RPS6KA3  | -    |
| hsa-miR-655 | RPS6KB1  | RPS6KB1  | -    |
| hsa-miR-655 | RPTN     | RPTN     | -    |

|             |           |           |         |
|-------------|-----------|-----------|---------|
| hsa-miR-655 | RRAGA     | RRAGA     | -       |
| hsa-miR-655 | RRAS2     | RRAS2     | -       |
| hsa-miR-655 | RREB1     | RREB1     | -       |
| hsa-miR-655 | RRP15     | -         | RRP15   |
| hsa-miR-655 | RSBN1     | RSBN1     | -       |
| hsa-miR-655 | RTKN2     | RTKN2     | -       |
| hsa-miR-655 | RTN1      | RTN1      | -       |
| hsa-miR-655 | RTN3      | RTN3      | -       |
| hsa-miR-655 | RUNX1T1   | RUNX1T1   | -       |
| hsa-miR-655 | RUSC2     | RUSC2     | -       |
| hsa-miR-655 | RYBP      | RYBP      | -       |
| hsa-miR-655 | -         | S100A10   | S100A10 |
| hsa-miR-655 | S100PBP   | S100PBP   | -       |
| hsa-miR-655 | S100Z     | S100Z     | -       |
| hsa-miR-655 | SAMSN1    | SAMSN1    | -       |
| hsa-miR-655 | SASH1     | SASH1     | -       |
| hsa-miR-655 | SASS6     | SASS6     | -       |
| hsa-miR-655 | SATB1     | SATB1     | -       |
| hsa-miR-655 | SATB2     | SATB2     | -       |
| hsa-miR-655 | SBNO1     | -         | SBNO1   |
| hsa-miR-655 | SC4MOL    | SC4MOL    | -       |
| hsa-miR-655 | SC5DL     | SC5DL     | -       |
| hsa-miR-655 | SCAMP1    | SCAMP1    | -       |
| hsa-miR-655 | SCARB2    | SCARB2    | -       |
| hsa-miR-655 | -         | SCFD1     | SCFD1   |
| hsa-miR-655 | SCG3      | SCG3      | -       |
| hsa-miR-655 | -         | SCLT1     | SCLT1   |
| hsa-miR-655 | SCN1A     | SCN1A     | -       |
| hsa-miR-655 | SCN3A     | SCN3A     | -       |
| hsa-miR-655 | -         | SCN9A     | SCN9A   |
| hsa-miR-655 | SCP2      | SCP2      | -       |
| hsa-miR-655 | SDC2      | SDC2      | -       |
| hsa-miR-655 | SDCBP     | SDCBP     | -       |
| hsa-miR-655 | SEC22A    | SEC22A    | -       |
| hsa-miR-655 | SEC22B    | SEC22B    | -       |
| hsa-miR-655 | SEC23A    | SEC23A    | -       |
| hsa-miR-655 | SEC23IP   | SEC23IP   | -       |
| hsa-miR-655 | SEC24A    | SEC24A    | -       |
| hsa-miR-655 | SEC62     | SEC62     | -       |
| hsa-miR-655 | SECISBP2L | SECISBP2L | -       |
| hsa-miR-655 | SEH1L     | SEH1L     | -       |
| hsa-miR-655 | SEL1L     | SEL1L     | -       |
| hsa-miR-655 | SEL1L3    | SEL1L3    | -       |
| hsa-miR-655 | SELK      | SELK      | -       |
| hsa-miR-655 | SEMA3A    | SEMA3A    | -       |
| hsa-miR-655 | SEMA3D    | SEMA3D    | -       |
| hsa-miR-655 | SENP5     | SENP5     | -       |
| hsa-miR-655 | SEP15     | SEP15     | -       |
| hsa-miR-655 | SEPSECS   | SEPSECS   | -       |
| hsa-miR-655 | SEPT10    | SEPT10    | -       |
| hsa-miR-655 | SERBP1    | SERBP1    | -       |

|             |          |          |         |
|-------------|----------|----------|---------|
| hsa-miR-655 | SERF1B   | SERF1B   | -       |
| hsa-miR-655 | SERF2    | SERF2    | -       |
| hsa-miR-655 | SERINC3  | SERINC3  | -       |
| hsa-miR-655 | SERP1    | SERP1    | -       |
| hsa-miR-655 | SERPINB9 | SERPINB9 | -       |
| hsa-miR-655 | SERPINI1 | SERPINI1 | -       |
| hsa-miR-655 | SERTAD2  | SERTAD2  | -       |
| hsa-miR-655 | SET      | SET      | -       |
| hsa-miR-655 | SETBP1   | SETBP1   | -       |
| hsa-miR-655 | SETD1B   | SETD1B   | -       |
| hsa-miR-655 | SETX     | SETX     | -       |
| hsa-miR-655 | SEZ6     | SEZ6     | -       |
| hsa-miR-655 | SEZ6L    | SEZ6L    | -       |
| hsa-miR-655 | SF3A1    | SF3A1    | -       |
| hsa-miR-655 | SFPQ     | SFPQ     | -       |
| hsa-miR-655 | -        | SFRS15   | SFRS15  |
| hsa-miR-655 | -        | SFRS2IP  | SFRS2IP |
| hsa-miR-655 | -        | SFRS8    | SFRS8   |
| hsa-miR-655 | SFXN1    | SFXN1    | -       |
| hsa-miR-655 | SGCB     | SGCB     | -       |
| hsa-miR-655 | SGCE     | SGCE     | -       |
| hsa-miR-655 | SGOL1    | SGOL1    | -       |
| hsa-miR-655 | SGOL2    | SGOL2    | -       |
| hsa-miR-655 | SGPP1    | SGPP1    | -       |
| hsa-miR-655 | SH2D1A   | SH2D1A   | -       |
| hsa-miR-655 | SH3BP5   | SH3BP5   | -       |
| hsa-miR-655 | SH3GL1   | SH3GL1   | -       |
| hsa-miR-655 | SH3KBP1  | SH3KBP1  | -       |
| hsa-miR-655 | SH3RF1   | SH3RF1   | -       |
| hsa-miR-655 | SH3TC2   | SH3TC2   | -       |
| hsa-miR-655 | SH3YL1   | SH3YL1   | -       |
| hsa-miR-655 | SHANK2   | SHANK2   | -       |
| hsa-miR-655 | SHC4     | SHC4     | -       |
| hsa-miR-655 | SHISA9   | SHISA9   | -       |
| hsa-miR-655 | SHOX2    | SHOX2    | -       |
| hsa-miR-655 | SHPRH    | SHPRH    | -       |
| hsa-miR-655 | SHROOM2  | SHROOM2  | -       |
| hsa-miR-655 | SIAH1    | SIAH1    | -       |
| hsa-miR-655 | SIAH3    | SIAH3    | -       |
| hsa-miR-655 | SIKE1    | SIKE1    | -       |
| hsa-miR-655 | SIN3A    | SIN3A    | -       |
| hsa-miR-655 | SIRT1    | SIRT1    | -       |
| hsa-miR-655 | SKI      | SKI      | -       |
| hsa-miR-655 | SKP1     | SKP1     | -       |
| hsa-miR-655 | SLAIN2   | SLAIN2   | -       |
| hsa-miR-655 | SLAMF7   | SLAMF7   | -       |
| hsa-miR-655 | SLC10A7  | SLC10A7  | -       |
| hsa-miR-655 | SLC12A6  | SLC12A6  | -       |
| hsa-miR-655 | SLC12A8  | SLC12A8  | -       |
| hsa-miR-655 | SLC14A1  | SLC14A1  | -       |
| hsa-miR-655 | SLC15A2  | SLC15A2  | -       |

|             |          |          |         |
|-------------|----------|----------|---------|
| hsa-miR-655 | SLC17A5  | SLC17A5  | -       |
| hsa-miR-655 | SLC1A1   | SLC1A1   | -       |
| hsa-miR-655 | SLC20A2  | SLC20A2  | -       |
| hsa-miR-655 | SLC22A15 | SLC22A15 | -       |
| hsa-miR-655 | SLC22A4  | SLC22A4  | -       |
| hsa-miR-655 | SLC25A12 | SLC25A12 | -       |
| hsa-miR-655 | SLC25A17 | SLC25A17 | -       |
| hsa-miR-655 | SLC25A21 | SLC25A21 | -       |
| hsa-miR-655 | SLC25A24 | SLC25A24 | -       |
| hsa-miR-655 | SLC25A26 | SLC25A26 | -       |
| hsa-miR-655 | SLC25A36 | SLC25A36 | -       |
| hsa-miR-655 | SLC25A4  | SLC25A4  | -       |
| hsa-miR-655 | SLC26A4  | SLC26A4  | -       |
| hsa-miR-655 | SLC2A13  | SLC2A13  | -       |
| hsa-miR-655 | SLC35A1  | SLC35A1  | -       |
| hsa-miR-655 | -        | SLC35B3  | SLC35B3 |
| hsa-miR-655 | SLC35B4  | SLC35B4  | -       |
| hsa-miR-655 | SLC35D3  | SLC35D3  | -       |
| hsa-miR-655 | SLC35F1  | SLC35F1  | -       |
| hsa-miR-655 | SLC35F4  | SLC35F4  | -       |
| hsa-miR-655 | SLC35F5  | SLC35F5  | -       |
| hsa-miR-655 | SLC37A2  | SLC37A2  | -       |
| hsa-miR-655 | SLC38A2  | SLC38A2  | -       |
| hsa-miR-655 | SLC39A10 | SLC39A10 | -       |
| hsa-miR-655 | SLC39A14 | SLC39A14 | -       |
| hsa-miR-655 | SLC39A8  | SLC39A8  | -       |
| hsa-miR-655 | SLC39A9  | SLC39A9  | -       |
| hsa-miR-655 | SLC4A4   | SLC4A4   | -       |
| hsa-miR-655 | SLC4A7   | SLC4A7   | -       |
| hsa-miR-655 | SLC5A3   | -        | SLC5A3  |
| hsa-miR-655 | SLC6A1   | SLC6A1   | -       |
| hsa-miR-655 | SLC6A15  | SLC6A15  | -       |
| hsa-miR-655 | SLC6A16  | SLC6A16  | -       |
| hsa-miR-655 | SLC8A1   | SLC8A1   | -       |
| hsa-miR-655 | SLC9A11  | SLC9A11  | -       |
| hsa-miR-655 | SLCO1A2  | SLCO1A2  | -       |
| hsa-miR-655 | SLITRK1  | SLITRK1  | -       |
| hsa-miR-655 | SLITRK5  | SLITRK5  | -       |
| hsa-miR-655 | SLK      | SLK      | -       |
| hsa-miR-655 | SLMAP    | SLMAP    | -       |
| hsa-miR-655 | SMAD5    | SMAD5    | -       |
| hsa-miR-655 | SMARCA1  | SMARCA1  | -       |
| hsa-miR-655 | SMARCA1  | SMARCA1  | -       |
| hsa-miR-655 | SMARCA1  | SMARCA1  | -       |
| hsa-miR-655 | SMARCE1  | SMARCE1  | -       |
| hsa-miR-655 | SMARCE1  | SMARCE1  | -       |
| hsa-miR-655 | SMARCE1  | SMARCE1  | -       |
| hsa-miR-655 | SMC2     | SMC2     | -       |
| hsa-miR-655 | SMC4     | SMC4     | -       |
| hsa-miR-655 | SMC6     | SMC6     | -       |
| hsa-miR-655 | SMNDC1   | SMNDC1   | -       |
| hsa-miR-655 | SMU1     | SMU1     | -       |
| hsa-miR-655 | SMU1     | SMU1     | -       |
| hsa-miR-655 | SMYD2    | SMYD2    | -       |
| hsa-miR-655 | SMYD2    | SMYD2    | -       |
| hsa-miR-655 | SNAI2    | SNAI2    | -       |



|             |         |         |        |
|-------------|---------|---------|--------|
| hsa-miR-655 | SNAPC1  | SNAPC1  | -      |
| hsa-miR-655 | -       | SNAPC3  | SNAPC3 |
| hsa-miR-655 | SNCA    | SNCA    | -      |
| hsa-miR-655 | SNRK    | SNRK    | -      |
| hsa-miR-655 | SNRNP40 | SNRNP40 | -      |
| hsa-miR-655 | SNRPE   | SNRPE   | -      |
| hsa-miR-655 | SNRPF   | SNRPF   | -      |
| hsa-miR-655 | SNX1    | SNX1    | -      |
| hsa-miR-655 | SNX13   | SNX13   | -      |
| hsa-miR-655 | SNX18   | SNX18   | -      |
| hsa-miR-655 | SNX19   | SNX19   | -      |
| hsa-miR-655 | SNX29   | SNX29   | -      |
| hsa-miR-655 | SNX6    | SNX6    | -      |
| hsa-miR-655 | SOCS2   | SOCS2   | -      |
| hsa-miR-655 | SOCS5   | SOCS5   | -      |
| hsa-miR-655 | SOCS6   | SOCS6   | -      |
| hsa-miR-655 | SON     | SON     | -      |
| hsa-miR-655 | SORBS1  | -       | SORBS1 |
| hsa-miR-655 | SOS1    | SOS1    | -      |
| hsa-miR-655 | SOX1    | SOX1    | -      |
| hsa-miR-655 | SOX18   | SOX18   | -      |
| hsa-miR-655 | SOX4    | SOX4    | -      |
| hsa-miR-655 | SOX9    | SOX9    | -      |
| hsa-miR-655 | SP3     | SP3     | -      |
| hsa-miR-655 | SP4     | SP4     | -      |
| hsa-miR-655 | SP8     | SP8     | -      |
| hsa-miR-655 | SPAG1   | SPAG1   | -      |
| hsa-miR-655 | SPAG9   | SPAG9   | -      |
| hsa-miR-655 | SPAST   | SPAST   | -      |
| hsa-miR-655 | SPATA12 | SPATA12 | -      |
| hsa-miR-655 | SPDYE1  | SPDYE1  | -      |
| hsa-miR-655 | SPDYE3  | SPDYE3  | -      |
| hsa-miR-655 | SPDYE5  | SPDYE5  | -      |
| hsa-miR-655 | SPDYE6  | SPDYE6  | -      |
| hsa-miR-655 | SPG11   | SPG11   | -      |
| hsa-miR-655 | SPG20   | SPG20   | -      |
| hsa-miR-655 | SPHKAP  | SPHKAP  | -      |
| hsa-miR-655 | SPIN1   | SPIN1   | -      |
| hsa-miR-655 | SPIN3   | SPIN3   | -      |
| hsa-miR-655 | SPIRE1  | SPIRE1  | -      |
| hsa-miR-655 | SPOCK1  | SPOCK1  | -      |
| hsa-miR-655 | SPOCK3  | SPOCK3  | -      |
| hsa-miR-655 | SPON1   | SPON1   | -      |
| hsa-miR-655 | SPPL3   | SPPL3   | -      |
| hsa-miR-655 | SPRED1  | SPRED1  | -      |
| hsa-miR-655 | SPRY1   | SPRY1   | -      |
| hsa-miR-655 | SRF     | SRF     | -      |
| hsa-miR-655 | SRGAP2  | SRGAP2  | -      |
| hsa-miR-655 | -       | SRP68   | SRP68  |
| hsa-miR-655 | SS18L1  | SS18L1  | -      |
| hsa-miR-655 | SSTR1   | SSTR1   | -      |

|             |          |          |   |
|-------------|----------|----------|---|
| hsa-miR-655 | SSX2IP   | SSX2IP   | - |
| hsa-miR-655 | ST3GAL3  | ST3GAL3  | - |
| hsa-miR-655 | ST6GAL2  | ST6GAL2  | - |
| hsa-miR-655 | ST7      | ST7      | - |
| hsa-miR-655 | ST7L     | ST7L     | - |
| hsa-miR-655 | ST8SIA2  | ST8SIA2  | - |
| hsa-miR-655 | STAM2    | STAM2    | - |
| hsa-miR-655 | STARD3   | STARD3   | - |
| hsa-miR-655 | STARD3NL | STARD3NL | - |
| hsa-miR-655 | STARD7   | STARD7   | - |
| hsa-miR-655 | STARD8   | STARD8   | - |
| hsa-miR-655 | STAT1    | STAT1    | - |
| hsa-miR-655 | STAT5B   | STAT5B   | - |
| hsa-miR-655 | STAU2    | STAU2    | - |
| hsa-miR-655 | STK17A   | STK17A   | - |
| hsa-miR-655 | STK38    | STK38    | - |
| hsa-miR-655 | STK38L   | STK38L   | - |
| hsa-miR-655 | STMN1    | STMN1    | - |
| hsa-miR-655 | STOM     | STOM     | - |
| hsa-miR-655 | STON1    | STON1    | - |
| hsa-miR-655 | STOX1    | STOX1    | - |
| hsa-miR-655 | STRN     | STRN     | - |
| hsa-miR-655 | STRN3    | STRN3    | - |
| hsa-miR-655 | STX17    | STX17    | - |
| hsa-miR-655 | STX3     | STX3     | - |
| hsa-miR-655 | STXBP5   | STXBP5   | - |
| hsa-miR-655 | STYX     | STYX     | - |
| hsa-miR-655 | SUB1     | SUB1     | - |
| hsa-miR-655 | SULF1    | SULF1    | - |
| hsa-miR-655 | SUN2     | SUN2     | - |
| hsa-miR-655 | SURF4    | SURF4    | - |
| hsa-miR-655 | SUSD5    | SUSD5    | - |
| hsa-miR-655 | SV2B     | SV2B     | - |
| hsa-miR-655 | SWAP70   | SWAP70   | - |
| hsa-miR-655 | SYCP2    | SYCP2    | - |
| hsa-miR-655 | SYCP2L   | SYCP2L   | - |
| hsa-miR-655 | SYDE2    | SYDE2    | - |
| hsa-miR-655 | SYNCRIP  | SYNCRIP  | - |
| hsa-miR-655 | SYNGR2   | SYNGR2   | - |
| hsa-miR-655 | SYNJ1    | SYNJ1    | - |
| hsa-miR-655 | SYNPO2   | SYNPO2   | - |
| hsa-miR-655 | SYNRG    | SYNRG    | - |
| hsa-miR-655 | SYT16    | SYT16    | - |
| hsa-miR-655 | SYT4     | SYT4     | - |
| hsa-miR-655 | SYTL2    | SYTL2    | - |
| hsa-miR-655 | TAB3     | TAB3     | - |
| hsa-miR-655 | TACSTD2  | TACSTD2  | - |
| hsa-miR-655 | TADA2B   | TADA2B   | - |
| hsa-miR-655 | TAF1     | TAF1     | - |
| hsa-miR-655 | TAF2     | TAF2     | - |
| hsa-miR-655 | TAF5L    | TAF5L    | - |

|             |          |          |      |
|-------------|----------|----------|------|
| hsa-miR-655 | TANC1    | TANC1    | -    |
| hsa-miR-655 | TAOK1    | TAOK1    | -    |
| hsa-miR-655 | TAX1BP1  | TAX1BP1  | -    |
| hsa-miR-655 | TBC1D12  | TBC1D12  | -    |
| hsa-miR-655 | TBC1D15  | TBC1D15  | -    |
| hsa-miR-655 | TBC1D23  | TBC1D23  | -    |
| hsa-miR-655 | TBC1D25  | TBC1D25  | -    |
| hsa-miR-655 | TBC1D30  | TBC1D30  | -    |
| hsa-miR-655 | TBC1D3F  | TBC1D3F  | -    |
| hsa-miR-655 | TBC1D3H  | TBC1D3H  | -    |
| hsa-miR-655 | TBC1D4   | TBC1D4   | -    |
| hsa-miR-655 | TBC1D5   | TBC1D5   | -    |
| hsa-miR-655 | TBX18    | TBX18    | -    |
| hsa-miR-655 | TBX2     | TBX2     | -    |
| hsa-miR-655 | TCF3     | TCF3     | -    |
| hsa-miR-655 | TCHHL1   | TCHHL1   | -    |
| hsa-miR-655 | TDO2     | TDO2     | -    |
| hsa-miR-655 | TECPR2   | TECPR2   | -    |
| hsa-miR-655 | TERF1    | TERF1    | -    |
| hsa-miR-655 | TET2     | TET2     | -    |
| hsa-miR-655 | TET3     | TET3     | -    |
| hsa-miR-655 | TEX15    | TEX15    | -    |
| hsa-miR-655 | TEX261   | TEX261   | -    |
| hsa-miR-655 | TFAM     | TFAM     | -    |
| hsa-miR-655 | TFEC     | TFEC     | -    |
| hsa-miR-655 | TFPI     | -        | TFPI |
| hsa-miR-655 | TGFA     | TGFA     | -    |
| hsa-miR-655 | TGFB2    | TGFB2    | -    |
| hsa-miR-655 | TGFBR1   | TGFBR1   | -    |
| hsa-miR-655 | TGFBR2   | TGFBR2   | -    |
| hsa-miR-655 | THAP1    | THAP1    | -    |
| hsa-miR-655 | THAP2    | THAP2    | -    |
| hsa-miR-655 | THBD     | THBD     | -    |
| hsa-miR-655 | THEMIS   | THEMIS   | -    |
| hsa-miR-655 | TIA1     | TIA1     | -    |
| hsa-miR-655 | TIFA     | TIFA     | -    |
| hsa-miR-655 | TIMELESS | TIMELESS | -    |
| hsa-miR-655 | TIMP2    | TIMP2    | -    |
| hsa-miR-655 | TKTL2    | TKTL2    | -    |
| hsa-miR-655 | TLK2     | TLK2     | -    |
| hsa-miR-655 | TLL1     | TLL1     | -    |
| hsa-miR-655 | TLR1     | TLR1     | -    |
| hsa-miR-655 | TLR4     | TLR4     | -    |
| hsa-miR-655 | TM4SF1   | TM4SF1   | -    |
| hsa-miR-655 | TM9SF3   | TM9SF3   | -    |
| hsa-miR-655 | TMCC1    | TMCC1    | -    |
| hsa-miR-655 | TMCO1    | TMCO1    | -    |
| hsa-miR-655 | TMEFF1   | TMEFF1   | -    |
| hsa-miR-655 | TMEM106B | TMEM106B | -    |
| hsa-miR-655 | TMEM117  | TMEM117  | -    |
| hsa-miR-655 | TMEM123  | TMEM123  | -    |

|             |             |             |        |
|-------------|-------------|-------------|--------|
| hsa-miR-655 | TMEM132B    | TMEM132B    | -      |
| hsa-miR-655 | TMEM135     | TMEM135     | -      |
| hsa-miR-655 | TMEM161B    | TMEM161B    | -      |
| hsa-miR-655 | TMEM167A    | TMEM167A    | -      |
| hsa-miR-655 | TMEM170A    | TMEM170A    | -      |
| hsa-miR-655 | TMEM180     | TMEM180     | -      |
| hsa-miR-655 | TMEM182     | TMEM182     | -      |
| hsa-miR-655 | TMEM194B    | TMEM194B    | -      |
| hsa-miR-655 | TMEM20      | TMEM20      | -      |
| hsa-miR-655 | TMEM200A    | TMEM200A    | -      |
| hsa-miR-655 | TMEM206     | TMEM206     | -      |
| hsa-miR-655 | TMEM207     | TMEM207     | -      |
| hsa-miR-655 | TMEM209     | TMEM209     | -      |
| hsa-miR-655 | TMEM215     | TMEM215     | -      |
| hsa-miR-655 | TMEM220     | TMEM220     | -      |
| hsa-miR-655 | TMEM30A     | TMEM30A     | -      |
| hsa-miR-655 | TMEM39A     | TMEM39A     | -      |
| hsa-miR-655 | TMEM41A     | TMEM41A     | -      |
| hsa-miR-655 | TMEM50A     | TMEM50A     | -      |
| hsa-miR-655 | -           | TMEM52      | TMEM52 |
| hsa-miR-655 | TMEM57      | TMEM57      | -      |
| hsa-miR-655 | TMEM64      | TMEM64      | -      |
| hsa-miR-655 | TMEM67      | TMEM67      | -      |
| hsa-miR-655 | TMEM68      | TMEM68      | -      |
| hsa-miR-655 | TMEM87A     | TMEM87A     | -      |
| hsa-miR-655 | TMEM87B     | TMEM87B     | -      |
| hsa-miR-655 | TMEM98      | TMEM98      | -      |
| hsa-miR-655 | TMEM9B      | TMEM9B      | -      |
| hsa-miR-655 | TMF1        | -           | TMF1   |
| hsa-miR-655 | TMLHE       | TMLHE       | -      |
| hsa-miR-655 | TMPO        | TMPO        | -      |
| hsa-miR-655 | TMPRSS11BNL | TMPRSS11BNL | -      |
| hsa-miR-655 | TMTC1       | TMTC1       | -      |
| hsa-miR-655 | TMTC2       | TMTC2       | -      |
| hsa-miR-655 | TMTC3       | TMTC3       | -      |
| hsa-miR-655 | TMX3        | TMX3        | -      |
| hsa-miR-655 | TNFRSF10D   | TNFRSF10D   | -      |
| hsa-miR-655 | TNFRSF19    | TNFRSF19    | -      |
| hsa-miR-655 | TNFSF4      | TNFSF4      | -      |
| hsa-miR-655 | TNFSF8      | TNFSF8      | -      |
| hsa-miR-655 | TOB2        | TOB2        | -      |
| hsa-miR-655 | TOMM20      | TOMM20      | -      |
| hsa-miR-655 | TOPBP1      | TOPBP1      | -      |
| hsa-miR-655 | TOR1AIP2    | TOR1AIP2    | -      |
| hsa-miR-655 | TOX         | TOX         | -      |
| hsa-miR-655 | TOX4        | TOX4        | -      |
| hsa-miR-655 | TP53INP1    | TP53INP1    | -      |
| hsa-miR-655 | TPR         | TPR         | -      |
| hsa-miR-655 | TPRG1       | TPRG1       | -      |
| hsa-miR-655 | TRA2A       | TRA2A       | -      |
| hsa-miR-655 | TRAK1       | TRAK1       | -      |

|             |          |          |      |
|-------------|----------|----------|------|
| hsa-miR-655 | TRAK2    | TRAK2    | -    |
| hsa-miR-655 | TRANK1   | TRANK1   | -    |
| hsa-miR-655 | TRAPPC10 | TRAPPC10 | -    |
| hsa-miR-655 | TRIB2    | TRIB2    | -    |
| hsa-miR-655 | TRIM2    | TRIM2    | -    |
| hsa-miR-655 | TRIM23   | TRIM23   | -    |
| hsa-miR-655 | TRIM32   | TRIM32   | -    |
| hsa-miR-655 | TRIM33   | TRIM33   | -    |
| hsa-miR-655 | TRIM44   | TRIM44   | -    |
| hsa-miR-655 | TRIM45   | TRIM45   | -    |
| hsa-miR-655 | TRIM49   | TRIM49   | -    |
| hsa-miR-655 | TRIM5    | TRIM5    | -    |
| hsa-miR-655 | TRIM59   | TRIM59   | -    |
| hsa-miR-655 | TRIM62   | TRIM62   | -    |
| hsa-miR-655 | TRIP13   | TRIP13   | -    |
| hsa-miR-655 | TRMT11   | TRMT11   | -    |
| hsa-miR-655 | TRMT5    | TRMT5    | -    |
| hsa-miR-655 | TRNT1    | TRNT1    | -    |
| hsa-miR-655 | TROVE2   | TROVE2   | -    |
| hsa-miR-655 | TRPC3    | TRPC3    | -    |
| hsa-miR-655 | TRPM7    | TRPM7    | -    |
| hsa-miR-655 | TRPM8    | TRPM8    | -    |
| hsa-miR-655 | TRPS1    | TRPS1    | -    |
| hsa-miR-655 | TSEN2    | TSEN2    | -    |
| hsa-miR-655 | TSGA14   | TSGA14   | -    |
| hsa-miR-655 | TSN      | TSN      | -    |
| hsa-miR-655 | TSNAX    | TSNAX    | -    |
| hsa-miR-655 | TSPAN12  | TSPAN12  | -    |
| hsa-miR-655 | TSPAN13  | TSPAN13  | -    |
| hsa-miR-655 | TSPAN19  | TSPAN19  | -    |
| hsa-miR-655 | TSPAN6   | TSPAN6   | -    |
| hsa-miR-655 | TSPAN7   | TSPAN7   | -    |
| hsa-miR-655 | TSPYL4   | TSPYL4   | -    |
| hsa-miR-655 | TSTD2    | TSTD2    | -    |
| hsa-miR-655 | TTC13    | TTC13    | -    |
| hsa-miR-655 | TTC14    | TTC14    | -    |
| hsa-miR-655 | TTC33    | TTC33    | -    |
| hsa-miR-655 | TTC39B   | TTC39B   | -    |
| hsa-miR-655 | TTC5     | TTC5     | -    |
| hsa-miR-655 | -        | TTC6     | TTC6 |
| hsa-miR-655 | -        | TTC8     | TTC8 |
| hsa-miR-655 | TTC9     | TTC9     | -    |
| hsa-miR-655 | TTF2     | TTF2     | -    |
| hsa-miR-655 | TTL      | TTL      | -    |
| hsa-miR-655 | TTR      | TTR      | -    |
| hsa-miR-655 | TUBE1    | TUBE1    | -    |
| hsa-miR-655 | TULP4    | TULP4    | -    |
| hsa-miR-655 | TUSC1    | TUSC1    | -    |
| hsa-miR-655 | TUSC3    | TUSC3    | -    |
| hsa-miR-655 | TWISTNB  | TWISTNB  | -    |
| hsa-miR-655 | TWSG1    | TWSG1    | -    |

|             |           |           |         |
|-------------|-----------|-----------|---------|
| hsa-miR-655 | TXK       | TXK       | -       |
| hsa-miR-655 | TXLNG     | TXLNG     | -       |
| hsa-miR-655 | TXNDC16   | TXNDC16   | -       |
| hsa-miR-655 | TXNDC17   | TXNDC17   | -       |
| hsa-miR-655 | TXNIP     | TXNIP     | -       |
| hsa-miR-655 | TXNL4B    | TXNL4B    | -       |
| hsa-miR-655 | TXNRD1    | TXNRD1    | -       |
| hsa-miR-655 | TYW1      | TYW1      | -       |
| hsa-miR-655 | TYW1B     | TYW1B     | -       |
| hsa-miR-655 | UBA6      | UBA6      | -       |
| hsa-miR-655 | UBD       | UBD       | -       |
| hsa-miR-655 | UBE2D3    | UBE2D3    | -       |
| hsa-miR-655 | UBE2E3    | UBE2E3    | -       |
| hsa-miR-655 | UBE2J1    | UBE2J1    | -       |
| hsa-miR-655 | UBE2K     | UBE2K     | -       |
| hsa-miR-655 | UBE3B     | UBE3B     | -       |
| hsa-miR-655 | UBE4B     | UBE4B     | -       |
| hsa-miR-655 | UBIAD1    | UBIAD1    | -       |
| hsa-miR-655 | UBL3      | UBL3      | -       |
| hsa-miR-655 | UBN2      | UBN2      | -       |
| hsa-miR-655 | UBR3      | UBR3      | -       |
| hsa-miR-655 | UBR5      | UBR5      | -       |
| hsa-miR-655 | UBXN8     | UBXN8     | -       |
| hsa-miR-655 | UCP3      | UCP3      | -       |
| hsa-miR-655 | UHMK1     | UHMK1     | -       |
| hsa-miR-655 | UHRF1BP1  | UHRF1BP1  | -       |
| hsa-miR-655 | UHRF1BP1L | UHRF1BP1L | -       |
| hsa-miR-655 | ULBP1     | ULBP1     | -       |
| hsa-miR-655 | UMODL1    | UMODL1    | -       |
| hsa-miR-655 | UNC119B   | UNC119B   | -       |
| hsa-miR-655 | UNC80     | UNC80     | -       |
| hsa-miR-655 | -         | UQCRFS1   | UQCRFS1 |
| hsa-miR-655 | USH2A     | USH2A     | -       |
| hsa-miR-655 | USO1      | USO1      | -       |
| hsa-miR-655 | USP12     | USP12     | -       |
| hsa-miR-655 | USP25     | USP25     | -       |
| hsa-miR-655 | USP27X    | USP27X    | -       |
| hsa-miR-655 | USP30     | USP30     | -       |
| hsa-miR-655 | USP33     | USP33     | -       |
| hsa-miR-655 | USP43     | USP43     | -       |
| hsa-miR-655 | USP46     | USP46     | -       |
| hsa-miR-655 | USP47     | USP47     | -       |
| hsa-miR-655 | USP48     | USP48     | -       |
| hsa-miR-655 | USP53     | USP53     | -       |
| hsa-miR-655 | USP6NL    | USP6NL    | -       |
| hsa-miR-655 | USP8      | USP8      | -       |
| hsa-miR-655 | UTP23     | UTP23     | -       |
| hsa-miR-655 | UTP3      | UTP3      | -       |
| hsa-miR-655 | UTY       | UTY       | -       |
| hsa-miR-655 | UVRAG     | UVRAG     | -       |
| hsa-miR-655 | VANGL2    | VANGL2    | -       |

|             |          |          |       |
|-------------|----------|----------|-------|
| hsa-miR-655 | VAT1L    | VAT1L    | -     |
| hsa-miR-655 | VAV3     | VAV3     | -     |
| hsa-miR-655 | VAX1     | VAX1     | -     |
| hsa-miR-655 | VBP1     | VBP1     | -     |
| hsa-miR-655 | VCPIP1   | VCPIP1   | -     |
| hsa-miR-655 | VDR      | VDR      | -     |
| hsa-miR-655 | VEGFA    | VEGFA    | -     |
| hsa-miR-655 | VEPH1    | VEPH1    | -     |
| hsa-miR-655 | VEZF1    | VEZF1    | -     |
| hsa-miR-655 | VEZT     | VEZT     | -     |
| hsa-miR-655 | VHL      | VHL      | -     |
| hsa-miR-655 | VIPR1    | VIPR1    | -     |
| hsa-miR-655 | VKORC1L1 | VKORC1L1 | -     |
| hsa-miR-655 | VPS13A   | VPS13A   | -     |
| hsa-miR-655 | VPS13B   | VPS13B   | -     |
| hsa-miR-655 | VPS13D   | VPS13D   | -     |
| hsa-miR-655 | VPS26B   | VPS26B   | -     |
| hsa-miR-655 | VPS4B    | VPS4B    | -     |
| hsa-miR-655 | VSIG1    | VSIG1    | -     |
| hsa-miR-655 | VSIG10   | VSIG10   | -     |
| hsa-miR-655 | VSNL1    | VSNL1    | -     |
| hsa-miR-655 | VTCN1    | VTCN1    | -     |
| hsa-miR-655 | VWA5A    | VWA5A    | -     |
| hsa-miR-655 | WAC      | WAC      | -     |
| hsa-miR-655 | WAPAL    | WAPAL    | -     |
| hsa-miR-655 | WASF1    | WASF1    | -     |
| hsa-miR-655 | WASF3    | WASF3    | -     |
| hsa-miR-655 | WBP4     | WBP4     | -     |
| hsa-miR-655 | WDFY1    | WDFY1    | -     |
| hsa-miR-655 | WDR11    | WDR11    | -     |
| hsa-miR-655 | WDR26    | WDR26    | -     |
| hsa-miR-655 | WDR33    | WDR33    | -     |
| hsa-miR-655 | WDR47    | WDR47    | -     |
| hsa-miR-655 | WDR52    | WDR52    | -     |
| hsa-miR-655 | -        | WDR67    | WDR67 |
| hsa-miR-655 | WDR72    | WDR72    | -     |
| hsa-miR-655 | WDR78    | WDR78    | -     |
| hsa-miR-655 | WDR85    | WDR85    | -     |
| hsa-miR-655 | WDR89    | WDR89    | -     |
| hsa-miR-655 | WEE1     | WEE1     | -     |
| hsa-miR-655 | WHSC1    | WHSC1    | -     |
| hsa-miR-655 | WHSC1L1  | WHSC1L1  | -     |
| hsa-miR-655 | WIF1     | WIF1     | -     |
| hsa-miR-655 | WISP1    | WISP1    | -     |
| hsa-miR-655 | WLS      | WLS      | -     |
| hsa-miR-655 | WNK1     | WNK1     | -     |
| hsa-miR-655 | WRN      | WRN      | -     |
| hsa-miR-655 | WSB1     | WSB1     | -     |
| hsa-miR-655 | WSB2     | WSB2     | -     |
| hsa-miR-655 | WWP1     | WWP1     | -     |
| hsa-miR-655 | WWP2     | WWP2     | -     |

|             |         |         |   |
|-------------|---------|---------|---|
| hsa-miR-655 | XIAP    | XIAP    | - |
| hsa-miR-655 | XIRP2   | XIRP2   | - |
| hsa-miR-655 | XKR5    | XKR5    | - |
| hsa-miR-655 | XPNPEP3 | XPNPEP3 | - |
| hsa-miR-655 | XPO1    | XPO1    | - |
| hsa-miR-655 | XPO7    | XPO7    | - |
| hsa-miR-655 | XRCC2   | XRCC2   | - |
| hsa-miR-655 | XRCC5   | XRCC5   | - |
| hsa-miR-655 | XRN1    | XRN1    | - |
| hsa-miR-655 | XYLT1   | XYLT1   | - |
| hsa-miR-655 | YAF2    | YAF2    | - |
| hsa-miR-655 | YES1    | YES1    | - |
| hsa-miR-655 | YIPF5   | YIPF5   | - |
| hsa-miR-655 | YOD1    | YOD1    | - |
| hsa-miR-655 | YPEL2   | YPEL2   | - |
| hsa-miR-655 | YTHDC2  | YTHDC2  | - |
| hsa-miR-655 | YTHDF1  | YTHDF1  | - |
| hsa-miR-655 | YTHDF3  | YTHDF3  | - |
| hsa-miR-655 | YWHAG   | YWHAG   | - |
| hsa-miR-655 | YWHAQ   | YWHAQ   | - |
| hsa-miR-655 | YWHAZ   | YWHAZ   | - |
| hsa-miR-655 | ZBTB1   | ZBTB1   | - |
| hsa-miR-655 | ZBTB49  | ZBTB49  | - |
| hsa-miR-655 | ZBTB5   | ZBTB5   | - |
| hsa-miR-655 | ZC3H11A | ZC3H11A | - |
| hsa-miR-655 | ZC3H13  | ZC3H13  | - |
| hsa-miR-655 | ZC3H14  | ZC3H14  | - |
| hsa-miR-655 | ZC3H4   | ZC3H4   | - |
| hsa-miR-655 | ZC3H6   | ZC3H6   | - |
| hsa-miR-655 | ZC3H7B  | ZC3H7B  | - |
| hsa-miR-655 | ZC3HAV1 | ZC3HAV1 | - |
| hsa-miR-655 | ZCCHC10 | ZCCHC10 | - |
| hsa-miR-655 | ZCCHC11 | ZCCHC11 | - |
| hsa-miR-655 | ZCCHC14 | ZCCHC14 | - |
| hsa-miR-655 | ZCCHC24 | ZCCHC24 | - |
| hsa-miR-655 | ZCRB1   | ZCRB1   | - |
| hsa-miR-655 | ZDHHC2  | ZDHHC2  | - |
| hsa-miR-655 | ZDHHC23 | ZDHHC23 | - |
| hsa-miR-655 | ZEB1    | ZEB1    | - |
| hsa-miR-655 | ZEB2    | ZEB2    | - |
| hsa-miR-655 | ZFAND5  | ZFAND5  | - |
| hsa-miR-655 | ZFAND6  | ZFAND6  | - |
| hsa-miR-655 | ZFP1    | ZFP1    | - |
| hsa-miR-655 | ZFP106  | ZFP106  | - |
| hsa-miR-655 | ZFP14   | ZFP14   | - |
| hsa-miR-655 | ZFP161  | ZFP161  | - |
| hsa-miR-655 | ZFPM2   | ZFPM2   | - |
| hsa-miR-655 | ZFR     | ZFR     | - |
| hsa-miR-655 | ZFX     | ZFX     | - |
| hsa-miR-655 | ZFYVE16 | ZFYVE16 | - |
| hsa-miR-655 | ZFYVE20 | ZFYVE20 | - |



|             |         |         |       |
|-------------|---------|---------|-------|
| hsa-miR-655 | ZHX3    | ZHX3    | -     |
| hsa-miR-655 | ZKSCAN2 | ZKSCAN2 | -     |
| hsa-miR-655 | ZKSCAN5 | ZKSCAN5 | -     |
| hsa-miR-655 | ZMAT3   | ZMAT3   | -     |
| hsa-miR-655 | -       | ZMYM6   | ZMYM6 |
| hsa-miR-655 | ZMYND11 | ZMYND11 | -     |
| hsa-miR-655 | ZMYND8  | ZMYND8  | -     |
| hsa-miR-655 | ZNF100  | ZNF100  | -     |
| hsa-miR-655 | ZNF117  | ZNF117  | -     |
| hsa-miR-655 | ZNF146  | ZNF146  | -     |
| hsa-miR-655 | ZNF192  | ZNF192  | -     |
| hsa-miR-655 | ZNF197  | ZNF197  | -     |
| hsa-miR-655 | ZNF2    | ZNF2    | -     |
| hsa-miR-655 | ZNF20   | -       | ZNF20 |
| hsa-miR-655 | ZNF217  | ZNF217  | -     |
| hsa-miR-655 | ZNF22   | ZNF22   | -     |
| hsa-miR-655 | ZNF230  | ZNF230  | -     |
| hsa-miR-655 | ZNF236  | ZNF236  | -     |
| hsa-miR-655 | ZNF24   | ZNF24   | -     |
| hsa-miR-655 | ZNF280B | ZNF280B | -     |
| hsa-miR-655 | ZNF280D | ZNF280D | -     |
| hsa-miR-655 | ZNF286A | ZNF286A | -     |
| hsa-miR-655 | ZNF292  | ZNF292  | -     |
| hsa-miR-655 | ZNF295  | ZNF295  | -     |
| hsa-miR-655 | ZNF318  | ZNF318  | -     |
| hsa-miR-655 | ZNF33A  | ZNF33A  | -     |
| hsa-miR-655 | ZNF33B  | ZNF33B  | -     |
| hsa-miR-655 | ZNF34   | ZNF34   | -     |
| hsa-miR-655 | ZNF345  | ZNF345  | -     |
| hsa-miR-655 | ZNF37A  | ZNF37A  | -     |
| hsa-miR-655 | ZNF417  | ZNF417  | -     |
| hsa-miR-655 | ZNF425  | ZNF425  | -     |
| hsa-miR-655 | ZNF43   | ZNF43   | -     |
| hsa-miR-655 | ZNF436  | ZNF436  | -     |
| hsa-miR-655 | ZNF439  | ZNF439  | -     |
| hsa-miR-655 | ZNF440  | ZNF440  | -     |
| hsa-miR-655 | ZNF460  | ZNF460  | -     |
| hsa-miR-655 | ZNF461  | ZNF461  | -     |
| hsa-miR-655 | ZNF470  | ZNF470  | -     |
| hsa-miR-655 | ZNF492  | ZNF492  | -     |
| hsa-miR-655 | ZNF498  | ZNF498  | -     |
| hsa-miR-655 | ZNF503  | ZNF503  | -     |
| hsa-miR-655 | ZNF507  | ZNF507  | -     |
| hsa-miR-655 | ZNF512B | ZNF512B | -     |
| hsa-miR-655 | ZNF527  | ZNF527  | -     |
| hsa-miR-655 | ZNF529  | ZNF529  | -     |
| hsa-miR-655 | ZNF532  | ZNF532  | -     |
| hsa-miR-655 | ZNF544  | ZNF544  | -     |
| hsa-miR-655 | ZNF557  | ZNF557  | -     |
| hsa-miR-655 | ZNF559  | ZNF559  | -     |
| hsa-miR-655 | ZNF567  | ZNF567  | -     |

|             |          |          |         |
|-------------|----------|----------|---------|
| hsa-miR-655 | ZNF569   | ZNF569   | -       |
| hsa-miR-655 | ZNF571   | ZNF571   | -       |
| hsa-miR-655 | ZNF572   | ZNF572   | -       |
| hsa-miR-655 | ZNF609   | ZNF609   | -       |
| hsa-miR-655 | ZNF614   | ZNF614   | -       |
| hsa-miR-655 | ZNF619   | ZNF619   | -       |
| hsa-miR-655 | ZNF626   | ZNF626   | -       |
| hsa-miR-655 | ZNF655   | ZNF655   | -       |
| hsa-miR-655 | ZNF674   | ZNF674   | -       |
| hsa-miR-655 | ZNF680   | ZNF680   | -       |
| hsa-miR-655 | ZNF681   | ZNF681   | -       |
| hsa-miR-655 | ZNF684   | ZNF684   | -       |
| hsa-miR-655 | ZNF709   | ZNF709   | -       |
| hsa-miR-655 | ZNF711   | ZNF711   | -       |
| hsa-miR-655 | ZNF716   | ZNF716   | -       |
| hsa-miR-655 | ZNF770   | ZNF770   | -       |
| hsa-miR-655 | ZNF772   | ZNF772   | -       |
| hsa-miR-655 | ZNF780A  | ZNF780A  | -       |
| hsa-miR-655 | ZNF793   | ZNF793   | -       |
| hsa-miR-655 | ZNF80    | ZNF80    | -       |
| hsa-miR-655 | ZNF805   | ZNF805   | -       |
| hsa-miR-655 | ZNF84    | ZNF84    | -       |
| hsa-miR-655 | ZNF879   | ZNF879   | -       |
| hsa-miR-655 | ZNF90    | ZNF90    | -       |
| hsa-miR-655 | ZNF91    | ZNF91    | -       |
| hsa-miR-655 | ZNF98    | ZNF98    | -       |
| hsa-miR-655 | ZNHIT6   | ZNHIT6   | -       |
| hsa-miR-655 | ZNRF2    | ZNRF2    | -       |
| hsa-miR-655 | ZPBP2    | ZPBP2    | -       |
| hsa-miR-655 | ZRANB2   | ZRANB2   | -       |
| hsa-miR-655 | ZSCAN29  | -        | ZSCAN29 |
| hsa-miR-655 | ZSWIM4   | ZSWIM4   | -       |
| hsa-miR-656 | A1CF     | A1CF     | -       |
| hsa-miR-656 | AAK1     | AAK1     | -       |
| hsa-miR-656 | AASDHPPT | AASDHPPT | -       |
| hsa-miR-656 | ABCA1    | ABCA1    | -       |
| hsa-miR-656 | ABCA12   | ABCA12   | -       |
| hsa-miR-656 | ABCA5    | ABCA5    | -       |
| hsa-miR-656 | -        | ABCA6    | ABCA6   |
| hsa-miR-656 | ABCA9    | ABCA9    | -       |
| hsa-miR-656 | ABCB10   | ABCB10   | -       |
| hsa-miR-656 | ABCB5    | ABCB5    | -       |
| hsa-miR-656 | ABCC6    | ABCC6    | -       |
| hsa-miR-656 | ABCC9    | ABCC9    | -       |
| hsa-miR-656 | ABCD2    | ABCD2    | -       |
| hsa-miR-656 | ABCD3    | ABCD3    | -       |
| hsa-miR-656 | ABCG2    | ABCG2    | -       |
| hsa-miR-656 | ABCG5    | ABCG5    | -       |
| hsa-miR-656 | ABHD10   | ABHD10   | -       |
| hsa-miR-656 | ABHD13   | ABHD13   | -       |
| hsa-miR-656 | ABHD15   | ABHD15   | -       |

|             |          |          |      |
|-------------|----------|----------|------|
| hsa-miR-656 | ABI1     | ABI1     | -    |
| hsa-miR-656 | ABI3BP   | ABI3BP   | -    |
| hsa-miR-656 | ACADSB   | ACADSB   | -    |
| hsa-miR-656 | ACAN     | ACAN     | -    |
| hsa-miR-656 | ACAP2    | ACAP2    | -    |
| hsa-miR-656 | ACBD3    | ACBD3    | -    |
| hsa-miR-656 | ACBD7    | ACBD7    | -    |
| hsa-miR-656 | ACOT12   | ACOT12   | -    |
| hsa-miR-656 | ACP1     | ACP1     | -    |
| hsa-miR-656 | ACPL2    | ACPL2    | -    |
| hsa-miR-656 | ACSL4    | ACSL4    | -    |
| hsa-miR-656 | ACSL6    | ACSL6    | -    |
| hsa-miR-656 | ACTBL2   | ACTBL2   | -    |
| hsa-miR-656 | ACTR10   | ACTR10   | -    |
| hsa-miR-656 | ACTR8    | ACTR8    | -    |
| hsa-miR-656 | ACVR1B   | ACVR1B   | -    |
| hsa-miR-656 | ACVR1C   | ACVR1C   | -    |
| hsa-miR-656 | ADAM22   | ADAM22   | -    |
| hsa-miR-656 | ADAM9    | ADAM9    | -    |
| hsa-miR-656 | ADAMTS18 | ADAMTS18 | -    |
| hsa-miR-656 | ADAMTS19 | ADAMTS19 | -    |
| hsa-miR-656 | ADAMTS5  | ADAMTS5  | -    |
| hsa-miR-656 | ADARB1   | ADARB1   | -    |
| hsa-miR-656 | ADCY6    | ADCY6    | -    |
| hsa-miR-656 | ADCYAP1  | ADCYAP1  | -    |
| hsa-miR-656 | ADD3     | ADD3     | -    |
| hsa-miR-656 | ADK      | ADK      | -    |
| hsa-miR-656 | ADNP     | ADNP     | -    |
| hsa-miR-656 | ADSS     | ADSS     | -    |
| hsa-miR-656 | AEBP2    | AEBP2    | -    |
| hsa-miR-656 | AFAP1L1  | AFAP1L1  | -    |
| hsa-miR-656 | AFAP1L2  | AFAP1L2  | -    |
| hsa-miR-656 | AFF3     | AFF3     | -    |
| hsa-miR-656 | AGBL3    | AGBL3    | -    |
| hsa-miR-656 | AGFG1    | AGFG1    | -    |
| hsa-miR-656 | AGGF1    | AGGF1    | -    |
| hsa-miR-656 | AGL      | AGL      | -    |
| hsa-miR-656 | AGPAT5   | AGPAT5   | -    |
| hsa-miR-656 | AGPS     | AGPS     | -    |
| hsa-miR-656 | -        | AGR3     | AGR3 |
| hsa-miR-656 | AGTPBP1  | AGTPBP1  | -    |
| hsa-miR-656 | AGTR2    | AGTR2    | -    |
| hsa-miR-656 | AHCTF1   | AHCTF1   | -    |
| hsa-miR-656 | AHI1     | AHI1     | -    |
| hsa-miR-656 | AHR      | AHR      | -    |
| hsa-miR-656 | AICDA    | AICDA    | -    |
| hsa-miR-656 | AJAP1    | AJAP1    | -    |
| hsa-miR-656 | AK5      | AK5      | -    |
| hsa-miR-656 | AKAP2    | AKAP2    | -    |
| hsa-miR-656 | AKAP5    | AKAP5    | -    |
| hsa-miR-656 | AKAP6    | AKAP6    | -    |

|             |          |          |         |
|-------------|----------|----------|---------|
| hsa-miR-656 | AKAP7    | AKAP7    | -       |
| hsa-miR-656 | AKAP8    | AKAP8    | -       |
| hsa-miR-656 | AKAP9    | AKAP9    | -       |
| hsa-miR-656 | AKT1     | AKT1     | -       |
| hsa-miR-656 | AKT3     | AKT3     | -       |
| hsa-miR-656 | ALDH1A1  | ALDH1A1  | -       |
| hsa-miR-656 | ALDH1A3  | ALDH1A3  | -       |
| hsa-miR-656 | ALDH5A1  | ALDH5A1  | -       |
| hsa-miR-656 | ALDH7A1  | ALDH7A1  | -       |
| hsa-miR-656 | ALDOB    | ALDOB    | -       |
| hsa-miR-656 | ALG10    | ALG10    | -       |
| hsa-miR-656 | ALG13    | ALG13    | -       |
| hsa-miR-656 | ALG2     | ALG2     | -       |
| hsa-miR-656 | ALG9     | ALG9     | -       |
| hsa-miR-656 | ALKBH5   | ALKBH5   | -       |
| hsa-miR-656 | -        | ALS2CR4  | ALS2CR4 |
| hsa-miR-656 | ALS2CR8  | ALS2CR8  | -       |
| hsa-miR-656 | AMMECR1  | AMMECR1  | -       |
| hsa-miR-656 | AMOT     | AMOT     | -       |
| hsa-miR-656 | AMOTL2   | AMOTL2   | -       |
| hsa-miR-656 | AMPD3    | AMPD3    | -       |
| hsa-miR-656 | ANGEL2   | ANGEL2   | -       |
| hsa-miR-656 | ANGPT1   | ANGPT1   | -       |
| hsa-miR-656 | ANGPT2   | ANGPT2   | -       |
| hsa-miR-656 | ANGPTL1  | ANGPTL1  | -       |
| hsa-miR-656 | ANGPTL2  | ANGPTL2  | -       |
| hsa-miR-656 | ANGPTL5  | ANGPTL5  | -       |
| hsa-miR-656 | ANK3     | ANK3     | -       |
| hsa-miR-656 | -        | ANKAR    | ANKAR   |
| hsa-miR-656 | ANKFY1   | ANKFY1   | -       |
| hsa-miR-656 | ANKIB1   | ANKIB1   | -       |
| hsa-miR-656 | ANKRD18A | ANKRD18A | -       |
| hsa-miR-656 | ANKRD26  | ANKRD26  | -       |
| hsa-miR-656 | ANKRD28  | ANKRD28  | -       |
| hsa-miR-656 | ANKRD49  | ANKRD49  | -       |
| hsa-miR-656 | ANKRD57  | ANKRD57  | -       |
| hsa-miR-656 | ANO3     | ANO3     | -       |
| hsa-miR-656 | ANO5     | ANO5     | -       |
| hsa-miR-656 | ANP32E   | ANP32E   | -       |
| hsa-miR-656 | -        | ANXA1    | ANXA1   |
| hsa-miR-656 | AP1AR    | AP1AR    | -       |
| hsa-miR-656 | AP1B1    | AP1B1    | -       |
| hsa-miR-656 | AP3M1    | AP3M1    | -       |
| hsa-miR-656 | APBA3    | APBA3    | -       |
| hsa-miR-656 | API5     | API5     | -       |
| hsa-miR-656 | APLF     | APLF     | -       |
| hsa-miR-656 | APLP2    | APLP2    | -       |
| hsa-miR-656 | APOL6    | APOL6    | -       |
| hsa-miR-656 | APPL2    | APPL2    | -       |
| hsa-miR-656 | AQP4     | AQP4     | -       |
| hsa-miR-656 | ARAP1    | ARAP1    | -       |

|             |          |          |        |
|-------------|----------|----------|--------|
| hsa-miR-656 | ARF6     | ARF6     | -      |
| hsa-miR-656 | ARFGAP3  | ARFGAP3  | -      |
| hsa-miR-656 | ARFGEF1  | ARFGEF1  | -      |
| hsa-miR-656 | ARFGEF2  | ARFGEF2  | -      |
| hsa-miR-656 | ARGFX    | ARGFX    | -      |
| hsa-miR-656 | ARHGAP20 | ARHGAP20 | -      |
| hsa-miR-656 | ARHGAP26 | ARHGAP26 | -      |
| hsa-miR-656 | ARHGAP28 | ARHGAP28 | -      |
| hsa-miR-656 | ARHGAP29 | ARHGAP29 | -      |
| hsa-miR-656 | ARHGAP42 | ARHGAP42 | -      |
| hsa-miR-656 | ARHGAP5  | ARHGAP5  | -      |
| hsa-miR-656 | ARHGEF11 | ARHGEF11 | -      |
| hsa-miR-656 | ARHGEF33 | ARHGEF33 | -      |
| hsa-miR-656 | ARHGEF6  | ARHGEF6  | -      |
| hsa-miR-656 | ARID1B   | ARID1B   | -      |
| hsa-miR-656 | ARID2    | ARID2    | -      |
| hsa-miR-656 | ARID4B   | ARID4B   | -      |
| hsa-miR-656 | ARID5B   | ARID5B   | -      |
| hsa-miR-656 | ARIH1    | ARIH1    | -      |
| hsa-miR-656 | ARL1     | ARL1     | -      |
| hsa-miR-656 | ARL13A   | ARL13A   | -      |
| hsa-miR-656 | ARL13B   | ARL13B   | -      |
| hsa-miR-656 | ARL15    | ARL15    | -      |
| hsa-miR-656 | ARL4C    | ARL4C    | -      |
| hsa-miR-656 | ARL5A    | ARL5A    | -      |
| hsa-miR-656 | ARL5B    | ARL5B    | -      |
| hsa-miR-656 | ARL6     | ARL6     | -      |
| hsa-miR-656 | ARL6IP1  | ARL6IP1  | -      |
| hsa-miR-656 | ARL6IP6  | ARL6IP6  | -      |
| hsa-miR-656 | ARL8B    | ARL8B    | -      |
| hsa-miR-656 | ARMCX3   | ARMCX3   | -      |
| hsa-miR-656 | -        | ARMCX5   | ARMCX5 |
| hsa-miR-656 | ARNT     | ARNT     | -      |
| hsa-miR-656 | -        | ARNTL    | ARNTL  |
| hsa-miR-656 | ARPC5    | ARPC5    | -      |
| hsa-miR-656 | ARPP21   | ARPP21   | -      |
| hsa-miR-656 | ARSB     | ARSB     | -      |
| hsa-miR-656 | ARSK     | ARSK     | -      |
| hsa-miR-656 | ASAH1    | ASAH1    | -      |
| hsa-miR-656 | ASAP2    | ASAP2    | -      |
| hsa-miR-656 | ASB2     | ASB2     | -      |
| hsa-miR-656 | ASB5     | ASB5     | -      |
| hsa-miR-656 | ASCC3    | ASCC3    | -      |
| hsa-miR-656 | ASCL3    | ASCL3    | -      |
| hsa-miR-656 | ASF1A    | ASF1A    | -      |
| hsa-miR-656 | ASH1L    | ASH1L    | -      |
| hsa-miR-656 | ASPA     | ASPA     | -      |
| hsa-miR-656 | ASPH     | ASPH     | -      |
| hsa-miR-656 | ASPN     | ASPN     | -      |
| hsa-miR-656 | ASTN1    | ASTN1    | -      |
| hsa-miR-656 | ASXL1    | ASXL1    | -      |

|             |          |          |          |
|-------------|----------|----------|----------|
| hsa-miR-656 | ASXL2    | ASXL2    | -        |
| hsa-miR-656 | ASXL3    | ASXL3    | -        |
| hsa-miR-656 | ATAD1    | ATAD1    | -        |
| hsa-miR-656 | ATAD2B   | ATAD2B   | -        |
| hsa-miR-656 | ATE1     | ATE1     | -        |
| hsa-miR-656 | ATF6     | ATF6     | -        |
| hsa-miR-656 | ATG10    | ATG10    | -        |
| hsa-miR-656 | ATG2B    | ATG2B    | -        |
| hsa-miR-656 | ATP10A   | ATP10A   | -        |
| hsa-miR-656 | -        | ATP10B   | ATP10B   |
| hsa-miR-656 | ATP10D   | ATP10D   | -        |
| hsa-miR-656 | ATP11A   | ATP11A   | -        |
| hsa-miR-656 | ATP11B   | ATP11B   | -        |
| hsa-miR-656 | ATP13A3  | ATP13A3  | -        |
| hsa-miR-656 | ATP5G3   | ATP5G3   | -        |
| hsa-miR-656 | ATP6V0A2 | -        | ATP6V0A2 |
| hsa-miR-656 | ATP8A1   | ATP8A1   | -        |
| hsa-miR-656 | ATP8B4   | ATP8B4   | -        |
| hsa-miR-656 | ATPAF1   | ATPAF1   | -        |
| hsa-miR-656 | ATPBD4   | ATPBD4   | -        |
| hsa-miR-656 | ATRNL1   | ATRNL1   | -        |
| hsa-miR-656 | ATRX     | ATRX     | -        |
| hsa-miR-656 | ATXN1    | ATXN1    | -        |
| hsa-miR-656 | ATXN2    | ATXN2    | -        |
| hsa-miR-656 | ATXN3    | ATXN3    | -        |
| hsa-miR-656 | ATXN7L1  | ATXN7L1  | -        |
| hsa-miR-656 | AUH      | AUH      | -        |
| hsa-miR-656 | AVPR1A   | AVPR1A   | -        |
| hsa-miR-656 | AXIN2    | AXIN2    | -        |
| hsa-miR-656 | AZI2     | AZI2     | -        |
| hsa-miR-656 | AZIN1    | AZIN1    | -        |
| hsa-miR-656 | -        | B3GALNT2 | B3GALNT2 |
| hsa-miR-656 | B3GALT2  | B3GALT2  | -        |
| hsa-miR-656 | B3GALTL  | B3GALTL  | -        |
| hsa-miR-656 | B3GNT2   | B3GNT2   | -        |
| hsa-miR-656 | B3GNT5   | B3GNT5   | -        |
| hsa-miR-656 | B3GNT7   | B3GNT7   | -        |
| hsa-miR-656 | B4GALT1  | B4GALT1  | -        |
| hsa-miR-656 | B4GALT4  | B4GALT4  | -        |
| hsa-miR-656 | B4GALT6  | B4GALT6  | -        |
| hsa-miR-656 | BACH1    | BACH1    | -        |
| hsa-miR-656 | BACH2    | BACH2    | -        |
| hsa-miR-656 | BAG2     | BAG2     | -        |
| hsa-miR-656 | BAG3     | BAG3     | -        |
| hsa-miR-656 | BAG4     | BAG4     | -        |
| hsa-miR-656 | BANK1    | BANK1    | -        |
| hsa-miR-656 | BASP1    | BASP1    | -        |
| hsa-miR-656 | BBS10    | BBS10    | -        |
| hsa-miR-656 | BBS12    | BBS12    | -        |
| hsa-miR-656 | BBS9     | BBS9     | -        |
| hsa-miR-656 | BBX      | BBX      | -        |

|             |           |           |           |
|-------------|-----------|-----------|-----------|
| hsa-miR-656 | BCAP29    | BCAP29    | -         |
| hsa-miR-656 | BCCIP     | BCCIP     | -         |
| hsa-miR-656 | BCDIN3D   | BCDIN3D   | -         |
| hsa-miR-656 | BCHE      | BCHE      | -         |
| hsa-miR-656 | BCL11A    | BCL11A    | -         |
| hsa-miR-656 | BCL11B    | BCL11B    | -         |
| hsa-miR-656 | BCL2      | BCL2      | -         |
| hsa-miR-656 | BCMO1     | BCMO1     | -         |
| hsa-miR-656 | BCO2      | BCO2      | -         |
| hsa-miR-656 | BCOR      | BCOR      | -         |
| hsa-miR-656 | BDH2      | BDH2      | -         |
| hsa-miR-656 | BDNF      | BDNF      | -         |
| hsa-miR-656 | BDP1      | BDP1      | -         |
| hsa-miR-656 | BEND2     | BEND2     | -         |
| hsa-miR-656 | BEND6     | BEND6     | -         |
| hsa-miR-656 | BEND7     | BEND7     | -         |
| hsa-miR-656 | BEST3     | BEST3     | -         |
| hsa-miR-656 | BET1      | BET1      | -         |
| hsa-miR-656 | BEX4      | BEX4      | -         |
| hsa-miR-656 | BHLHE22   | BHLHE22   | -         |
| hsa-miR-656 | BHLHE41   | BHLHE41   | -         |
| hsa-miR-656 | BICD2     | BICD2     | -         |
| hsa-miR-656 | BID       | BID       | -         |
| hsa-miR-656 | BLOC1S2   | BLOC1S2   | -         |
| hsa-miR-656 | BMP3      | BMP3      | -         |
| hsa-miR-656 | BMP5      | BMP5      | -         |
| hsa-miR-656 | BMPR1B    | BMPR1B    | -         |
| hsa-miR-656 | BNIP2     | BNIP2     | -         |
| hsa-miR-656 | BNIP3     | BNIP3     | -         |
| hsa-miR-656 | BPGM      | BPGM      | -         |
| hsa-miR-656 | BRD3      | BRD3      | -         |
| hsa-miR-656 | BRD8      | BRD8      | -         |
| hsa-miR-656 | BRF2      | BRF2      | -         |
| hsa-miR-656 | BRPF3     | BRPF3     | -         |
| hsa-miR-656 | BRWD1     | BRWD1     | -         |
| hsa-miR-656 | BTAF1     | BTAF1     | -         |
| hsa-miR-656 | BTBD10    | BTBD10    | -         |
| hsa-miR-656 | BTBD7     | BTBD7     | -         |
| hsa-miR-656 | BTBD9     | BTBD9     | -         |
| hsa-miR-656 | BTF3L4    | BTF3L4    | -         |
| hsa-miR-656 | BTN3A2    | BTN3A2    | -         |
| hsa-miR-656 | BUB3      | BUB3      | -         |
| hsa-miR-656 | BZW1      | BZW1      | -         |
| hsa-miR-656 | C10orf118 | C10orf118 | -         |
| hsa-miR-656 | -         | C10orf119 | C10orf119 |
| hsa-miR-656 | C10orf32  | C10orf32  | -         |
| hsa-miR-656 | C10orf46  | C10orf46  | -         |
| hsa-miR-656 | C10orf47  | C10orf47  | -         |
| hsa-miR-656 | -         | C11orf17  | C11orf17  |
| hsa-miR-656 | C11orf41  | C11orf41  | -         |
| hsa-miR-656 | C11orf54  | C11orf54  | -         |

|             |           |           |           |
|-------------|-----------|-----------|-----------|
| hsa-miR-656 | C11orf61  | C11orf61  | -         |
| hsa-miR-656 | C11orf82  | C11orf82  | -         |
| hsa-miR-656 | C11orf87  | C11orf87  | -         |
| hsa-miR-656 | C12orf26  | C12orf26  | -         |
| hsa-miR-656 | C12orf40  | C12orf40  | -         |
| hsa-miR-656 | C12orf48  | C12orf48  | -         |
| hsa-miR-656 | C12orf51  | C12orf51  | -         |
| hsa-miR-656 | C12orf73  | C12orf73  | -         |
| hsa-miR-656 | C12orf75  | C12orf75  | -         |
| hsa-miR-656 | C12orf77  | C12orf77  | -         |
| hsa-miR-656 | C13orf30  | C13orf30  | -         |
| hsa-miR-656 | C13orf38  | C13orf38  | -         |
| hsa-miR-656 | C14orf119 | C14orf119 | -         |
| hsa-miR-656 | C14orf126 | C14orf126 | -         |
| hsa-miR-656 | C14orf129 | C14orf129 | -         |
| hsa-miR-656 | C14orf147 | C14orf147 | -         |
| hsa-miR-656 | C14orf39  | C14orf39  | -         |
| hsa-miR-656 | C15orf2   | C15orf2   | -         |
| hsa-miR-656 | C15orf40  | C15orf40  | -         |
| hsa-miR-656 | C15orf53  | C15orf53  | -         |
| hsa-miR-656 | C16orf46  | C16orf46  | -         |
| hsa-miR-656 | C16orf72  | C16orf72  | -         |
| hsa-miR-656 | C16orf93  | C16orf93  | -         |
| hsa-miR-656 | C17orf39  | C17orf39  | -         |
| hsa-miR-656 | C17orf80  | C17orf80  | -         |
| hsa-miR-656 | C18orf25  | C18orf25  | -         |
| hsa-miR-656 | C18orf32  | C18orf32  | -         |
| hsa-miR-656 | C18orf54  | C18orf54  | -         |
| hsa-miR-656 | C19orf12  | C19orf12  | -         |
| hsa-miR-656 | C19orf47  | C19orf47  | -         |
| hsa-miR-656 | C19orf69  | C19orf69  | -         |
| hsa-miR-656 | C1GALT1   | C1GALT1   | -         |
| hsa-miR-656 | C1QTNF2   | C1QTNF2   | -         |
| hsa-miR-656 | C1QTNF3   | C1QTNF3   | -         |
| hsa-miR-656 | C1QTNF7   | C1QTNF7   | -         |
| hsa-miR-656 | C1orf124  | C1orf124  | -         |
| hsa-miR-656 | C1orf168  | C1orf168  | -         |
| hsa-miR-656 | C1orf210  | C1orf210  | -         |
| hsa-miR-656 | C1orf27   | C1orf27   | -         |
| hsa-miR-656 | C1orf56   | C1orf56   | -         |
| hsa-miR-656 | C20orf11  | C20orf11  | -         |
| hsa-miR-656 | C20orf177 | C20orf177 | -         |
| hsa-miR-656 | -         | C20orf195 | C20orf195 |
| hsa-miR-656 | C21orf62  | C21orf62  | -         |
| hsa-miR-656 | C21orf91  | C21orf91  | -         |
| hsa-miR-656 | C22orf29  | C22orf29  | -         |
| hsa-miR-656 | C2CD2     | C2CD2     | -         |
| hsa-miR-656 | C2orf3    | C2orf3    | -         |
| hsa-miR-656 | C2orf63   | C2orf63   | -         |
| hsa-miR-656 | C2orf67   | C2orf67   | -         |
| hsa-miR-656 | C3orf55   | C3orf55   | -         |



|             |          |          |          |
|-------------|----------|----------|----------|
| hsa-miR-656 | C3orf58  | C3orf58  | -        |
| hsa-miR-656 | C4orf3   | C4orf3   | -        |
| hsa-miR-656 | C4orf32  | C4orf32  | -        |
| hsa-miR-656 | C4orf40  | C4orf40  | -        |
| hsa-miR-656 | C4orf41  | C4orf41  | -        |
| hsa-miR-656 | C4orf43  | C4orf43  | -        |
| hsa-miR-656 | C4orf46  | C4orf46  | -        |
| hsa-miR-656 | C5orf15  | C5orf15  | -        |
| hsa-miR-656 | C5orf22  | C5orf22  | -        |
| hsa-miR-656 | C5orf28  | C5orf28  | -        |
| hsa-miR-656 | C5orf41  | C5orf41  | -        |
| hsa-miR-656 | C5orf42  | C5orf42  | -        |
| hsa-miR-656 | C5orf43  | C5orf43  | -        |
| hsa-miR-656 | C5orf44  | C5orf44  | -        |
| hsa-miR-656 | C5orf47  | C5orf47  | -        |
| hsa-miR-656 | C5orf54  | C5orf54  | -        |
| hsa-miR-656 | C6orf138 | C6orf138 | -        |
| hsa-miR-656 | -        | C6orf167 | C6orf167 |
| hsa-miR-656 | C6orf168 | C6orf168 | -        |
| hsa-miR-656 | C6orf170 | C6orf170 | -        |
| hsa-miR-656 | C6orf225 | C6orf225 | -        |
| hsa-miR-656 | -        | C6orf57  | C6orf57  |
| hsa-miR-656 | C6orf89  | C6orf89  | -        |
| hsa-miR-656 | C6orf97  | C6orf97  | -        |
| hsa-miR-656 | C7orf51  | C7orf51  | -        |
| hsa-miR-656 | C7orf57  | C7orf57  | -        |
| hsa-miR-656 | C7orf58  | C7orf58  | -        |
| hsa-miR-656 | C7orf63  | C7orf63  | -        |
| hsa-miR-656 | C8orf22  | C8orf22  | -        |
| hsa-miR-656 | C8orf34  | C8orf34  | -        |
| hsa-miR-656 | C8orf37  | C8orf37  | -        |
| hsa-miR-656 | C8orf4   | C8orf4   | -        |
| hsa-miR-656 | C8orf83  | C8orf83  | -        |
| hsa-miR-656 | C8orf84  | C8orf84  | -        |
| hsa-miR-656 | C9       | C9       | -        |
| hsa-miR-656 | C9orf102 | C9orf102 | -        |
| hsa-miR-656 | C9orf170 | C9orf170 | -        |
| hsa-miR-656 | C9orf25  | C9orf25  | -        |
| hsa-miR-656 | C9orf64  | C9orf64  | -        |
| hsa-miR-656 | C9orf72  | C9orf72  | -        |
| hsa-miR-656 | CA3      | CA3      | -        |
| hsa-miR-656 | CA5B     | CA5B     | -        |
| hsa-miR-656 | CAB39    | CAB39    | -        |
| hsa-miR-656 | CAB39L   | CAB39L   | -        |
| hsa-miR-656 | CACNA1C  | CACNA1C  | -        |
| hsa-miR-656 | CACNA1D  | CACNA1D  | -        |
| hsa-miR-656 | CACNB2   | CACNB2   | -        |
| hsa-miR-656 | CACNB4   | CACNB4   | -        |
| hsa-miR-656 | CADM2    | CADM2    | -        |
| hsa-miR-656 | CALB1    | CALB1    | -        |
| hsa-miR-656 | CALCR    | CALCR    | -        |

|             |           |           |         |
|-------------|-----------|-----------|---------|
| hsa-miR-656 | CAND1     | CAND1     | -       |
| hsa-miR-656 | CANX      | CANX      | -       |
| hsa-miR-656 | CAPN7     | CAPN7     | -       |
| hsa-miR-656 | CAPRIN1   | CAPRIN1   | -       |
| hsa-miR-656 | CAPZA2    | CAPZA2    | -       |
| hsa-miR-656 | CASC4     | CASC4     | -       |
| hsa-miR-656 | CASS4     | CASS4     | -       |
| hsa-miR-656 | CASZ1     | CASZ1     | -       |
| hsa-miR-656 | CAV2      | CAV2      | -       |
| hsa-miR-656 | CBFA2T2   | CBFA2T2   | -       |
| hsa-miR-656 | CBLL1     | CBLL1     | -       |
| hsa-miR-656 | CBLN4     | CBLN4     | -       |
| hsa-miR-656 | CBWD1     | CBWD1     | -       |
| hsa-miR-656 | CBWD3     | CBWD3     | -       |
| hsa-miR-656 | CBWD5     | CBWD5     | -       |
| hsa-miR-656 | CCBE1     | CCBE1     | -       |
| hsa-miR-656 | CCDC102B  | CCDC102B  | -       |
| hsa-miR-656 | CCDC108   | CCDC108   | -       |
| hsa-miR-656 | CCDC112   | CCDC112   | -       |
| hsa-miR-656 | CCDC117   | CCDC117   | -       |
| hsa-miR-656 | -         | CCDC122   | CCDC122 |
| hsa-miR-656 | CCDC126   | CCDC126   | -       |
| hsa-miR-656 | CCDC132   | -         | CCDC132 |
| hsa-miR-656 | CCDC14    | CCDC14    | -       |
| hsa-miR-656 | CCDC141   | CCDC141   | -       |
| hsa-miR-656 | CCDC144NL | CCDC144NL | -       |
| hsa-miR-656 | CCDC148   | CCDC148   | -       |
| hsa-miR-656 | CCDC34    | CCDC34    | -       |
| hsa-miR-656 | CCDC36    | CCDC36    | -       |
| hsa-miR-656 | -         | CCDC40    | CCDC40  |
| hsa-miR-656 | CCDC50    | CCDC50    | -       |
| hsa-miR-656 | CCDC68    | CCDC68    | -       |
| hsa-miR-656 | -         | CCDC73    | CCDC73  |
| hsa-miR-656 | CCDC76    | CCDC76    | -       |
| hsa-miR-656 | CCDC82    | CCDC82    | -       |
| hsa-miR-656 | CCDC85A   | CCDC85A   | -       |
| hsa-miR-656 | CCDC88A   | CCDC88A   | -       |
| hsa-miR-656 | CCDC88C   | CCDC88C   | -       |
| hsa-miR-656 | CCDC89    | CCDC89    | -       |
| hsa-miR-656 | CCL28     | CCL28     | -       |
| hsa-miR-656 | -         | CCL7      | CCL7    |
| hsa-miR-656 | CCND1     | CCND1     | -       |
| hsa-miR-656 | CCND2     | CCND2     | -       |
| hsa-miR-656 | CCNG2     | CCNG2     | -       |
| hsa-miR-656 | CCNJ      | CCNJ      | -       |
| hsa-miR-656 | CCNT2     | CCNT2     | -       |
| hsa-miR-656 | CCT4      | CCT4      | -       |
| hsa-miR-656 | CCT6A     | CCT6A     | -       |
| hsa-miR-656 | -         | CCT8      | CCT8    |
| hsa-miR-656 | CD109     | CD109     | -       |
| hsa-miR-656 | CD163     | CD163     | -       |

|             |          |          |        |
|-------------|----------|----------|--------|
| hsa-miR-656 | CD164    | CD164    | -      |
| hsa-miR-656 | CD200R1  | CD200R1  | -      |
| hsa-miR-656 | CD226    | CD226    | -      |
| hsa-miR-656 | CD244    | CD244    | -      |
| hsa-miR-656 | CD2AP    | CD2AP    | -      |
| hsa-miR-656 | CD84     | CD84     | -      |
| hsa-miR-656 | CD96     | CD96     | -      |
| hsa-miR-656 | CDC14A   | CDC14A   | -      |
| hsa-miR-656 | CDC23    | CDC23    | -      |
| hsa-miR-656 | CDC27    | CDC27    | -      |
| hsa-miR-656 | CDC40    | CDC40    | -      |
| hsa-miR-656 | CDC42BPB | CDC42BPB | -      |
| hsa-miR-656 | CDC42EP3 | CDC42EP3 | -      |
| hsa-miR-656 | CDC42EP4 | CDC42EP4 | -      |
| hsa-miR-656 | CDC42SE2 | CDC42SE2 | -      |
| hsa-miR-656 | CDC6     | CDC6     | -      |
| hsa-miR-656 | -        | CDH8     | CDH8   |
| hsa-miR-656 | CDK1     | CDK1     | -      |
| hsa-miR-656 | CDK12    | CDK12    | -      |
| hsa-miR-656 | CDK14    | CDK14    | -      |
| hsa-miR-656 | CDK18    | CDK18    | -      |
| hsa-miR-656 | CDK19    | CDK19    | -      |
| hsa-miR-656 | CDKL2    | CDKL2    | -      |
| hsa-miR-656 | CDKL4    | CDKL4    | -      |
| hsa-miR-656 | CDKN1B   | CDKN1B   | -      |
| hsa-miR-656 | CDKN2B   | CDKN2B   | -      |
| hsa-miR-656 | CDRT4    | CDRT4    | -      |
| hsa-miR-656 | CEACAM1  | CEACAM1  | -      |
| hsa-miR-656 | CEACAM5  | CEACAM5  | -      |
| hsa-miR-656 | CEBPA    | CEBPA    | -      |
| hsa-miR-656 | CELA2A   | CELA2A   | -      |
| hsa-miR-656 | CELA2B   | CELA2B   | -      |
| hsa-miR-656 | CELF2    | CELF2    | -      |
| hsa-miR-656 | CENPA    | CENPA    | -      |
| hsa-miR-656 | -        | CENPC1   | CENPC1 |
| hsa-miR-656 | CENPE    | CENPE    | -      |
| hsa-miR-656 | CENPL    | CENPL    | -      |
| hsa-miR-656 | CEP120   | CEP120   | -      |
| hsa-miR-656 | CEP152   | CEP152   | -      |
| hsa-miR-656 | -        | CEP192   | CEP192 |
| hsa-miR-656 | -        | CEP290   | CEP290 |
| hsa-miR-656 | CEP63    | CEP63    | -      |
| hsa-miR-656 | CEP76    | CEP76    | -      |
| hsa-miR-656 | CEP97    | CEP97    | -      |
| hsa-miR-656 | CERKL    | CERKL    | -      |
| hsa-miR-656 | -        | CETN3    | CETN3  |
| hsa-miR-656 | CFHR3    | CFHR3    | -      |
| hsa-miR-656 | CFHR4    | CFHR4    | -      |
| hsa-miR-656 | CHAC2    | CHAC2    | -      |
| hsa-miR-656 | CHCHD4   | CHCHD4   | -      |
| hsa-miR-656 | CHD1     | CHD1     | -      |

|             |        |        |       |
|-------------|--------|--------|-------|
| hsa-miR-656 | CHD6   | CHD6   | -     |
| hsa-miR-656 | CHD9   | CHD9   | -     |
| hsa-miR-656 | CHFR   | CHFR   | -     |
| hsa-miR-656 | CHL1   | CHL1   | -     |
| hsa-miR-656 | CHM    | CHM    | -     |
| hsa-miR-656 | CHML   | CHML   | -     |
| hsa-miR-656 | CHMP1B | CHMP1B | -     |
| hsa-miR-656 | CHMP2B | CHMP2B | -     |
| hsa-miR-656 | CHMP5  | CHMP5  | -     |
| hsa-miR-656 | CHN2   | CHN2   | -     |
| hsa-miR-656 | CHP    | CHP    | -     |
| hsa-miR-656 | CHP2   | CHP2   | -     |
| hsa-miR-656 | CHRNA3 | CHRNA3 | -     |
| hsa-miR-656 | CHRNA5 | CHRNA5 | -     |
| hsa-miR-656 | CHST12 | CHST12 | -     |
| hsa-miR-656 | CHURC1 | CHURC1 | -     |
| hsa-miR-656 | CIAO1  | CIAO1  | -     |
| hsa-miR-656 | -      | CKAP2  | CKAP2 |
| hsa-miR-656 | CKMT2  | CKMT2  | -     |
| hsa-miR-656 | CLASP2 | CLASP2 | -     |
| hsa-miR-656 | CLCN5  | CLCN5  | -     |
| hsa-miR-656 | CLDN11 | CLDN11 | -     |
| hsa-miR-656 | CLDN14 | CLDN14 | -     |
| hsa-miR-656 | CLDN16 | CLDN16 | -     |
| hsa-miR-656 | CLDN22 | CLDN22 | -     |
| hsa-miR-656 | CLEC5A | CLEC5A | -     |
| hsa-miR-656 | CLEC7A | CLEC7A | -     |
| hsa-miR-656 | CLGN   | CLGN   | -     |
| hsa-miR-656 | CLIC2  | CLIC2  | -     |
| hsa-miR-656 | CLIC5  | CLIC5  | -     |
| hsa-miR-656 | CLINT1 | CLINT1 | -     |
| hsa-miR-656 | CLIP4  | CLIP4  | -     |
| hsa-miR-656 | CLLU1  | CLLU1  | -     |
| hsa-miR-656 | CLNS1A | CLNS1A | -     |
| hsa-miR-656 | CLRN1  | CLRN1  | -     |
| hsa-miR-656 | CLVS1  | CLVS1  | -     |
| hsa-miR-656 | CLVS2  | CLVS2  | -     |
| hsa-miR-656 | CMPK1  | CMPK1  | -     |
| hsa-miR-656 | CMPK2  | CMPK2  | -     |
| hsa-miR-656 | CMTM6  | CMTM6  | -     |
| hsa-miR-656 | CNBP   | CNBP   | -     |
| hsa-miR-656 | -      | CNGA1  | CNGA1 |
| hsa-miR-656 | CNGB3  | CNGB3  | -     |
| hsa-miR-656 | CNIH   | CNIH   | -     |
| hsa-miR-656 | CNNM4  | CNNM4  | -     |
| hsa-miR-656 | CNOT10 | CNOT10 | -     |
| hsa-miR-656 | CNOT4  | CNOT4  | -     |
| hsa-miR-656 | CNOT6  | CNOT6  | -     |
| hsa-miR-656 | CNOT7  | CNOT7  | -     |
| hsa-miR-656 | CNTLN  | CNTLN  | -     |
| hsa-miR-656 | CNTN4  | CNTN4  | -     |

|             |            |            |       |
|-------------|------------|------------|-------|
| hsa-miR-656 | CNTNAP2    | CNTNAP2    | -     |
| hsa-miR-656 | COBLL1     | COBLL1     | -     |
| hsa-miR-656 | COG5       | COG5       | -     |
| hsa-miR-656 | COG6       | COG6       | -     |
| hsa-miR-656 | COL11A1    | COL11A1    | -     |
| hsa-miR-656 | COL12A1    | COL12A1    | -     |
| hsa-miR-656 | COL23A1    | COL23A1    | -     |
| hsa-miR-656 | COL4A3     | COL4A3     | -     |
| hsa-miR-656 | COL4A4     | COL4A4     | -     |
| hsa-miR-656 | COL4A5     | COL4A5     | -     |
| hsa-miR-656 | COLEC12    | COLEC12    | -     |
| hsa-miR-656 | COMMD10    | COMMD10    | -     |
| hsa-miR-656 | COPA       | COPA       | -     |
| hsa-miR-656 | COPS7A     | COPS7A     | -     |
| hsa-miR-656 | COQ10B     | COQ10B     | -     |
| hsa-miR-656 | COX11      | COX11      | -     |
| hsa-miR-656 | CP         | CP         | -     |
| hsa-miR-656 | CPEB3      | CPEB3      | -     |
| hsa-miR-656 | CPEB4      | CPEB4      | -     |
| hsa-miR-656 | CPM        | CPM        | -     |
| hsa-miR-656 | CPNE3      | CPNE3      | -     |
| hsa-miR-656 | CPNE8      | CPNE8      | -     |
| hsa-miR-656 | CPOX       | CPOX       | -     |
| hsa-miR-656 | CREB1      | CREB1      | -     |
| hsa-miR-656 | CREBBP     | CREBBP     | -     |
| hsa-miR-656 | CREBL2     | CREBL2     | -     |
| hsa-miR-656 | CREM       | CREM       | -     |
| hsa-miR-656 | CRHR1      | CRHR1      | -     |
| hsa-miR-656 | CRIM1      | CRIM1      | -     |
| hsa-miR-656 | -          | CRIP1      | CRIP1 |
| hsa-miR-656 | CRISP1     | CRISP1     | -     |
| hsa-miR-656 | CRISP3     | CRISP3     | -     |
| hsa-miR-656 | CRISPLD1   | CRISPLD1   | -     |
| hsa-miR-656 | CRKL       | CRKL       | -     |
| hsa-miR-656 | CRLS1      | CRLS1      | -     |
| hsa-miR-656 | CRYZ       | CRYZ       | -     |
| hsa-miR-656 | CS         | CS         | -     |
| hsa-miR-656 | CSDA       | CSDA       | -     |
| hsa-miR-656 | CSGALNACT2 | CSGALNACT2 | -     |
| hsa-miR-656 | CSMD1      | CSMD1      | -     |
| hsa-miR-656 | CSPG4      | CSPG4      | -     |
| hsa-miR-656 | CSRNP3     | CSRNP3     | -     |
| hsa-miR-656 | CSTF3      | CSTF3      | -     |
| hsa-miR-656 | CTAGE1     | CTAGE1     | -     |
| hsa-miR-656 | CTBS       | CTBS       | -     |
| hsa-miR-656 | CTCFL      | CTCFL      | -     |
| hsa-miR-656 | CTH        | CTH        | -     |
| hsa-miR-656 | CTNNA2     | CTNNA2     | -     |
| hsa-miR-656 | CTR9       | CTR9       | -     |
| hsa-miR-656 | CTSC       | CTSC       | -     |
| hsa-miR-656 | -          | CTSL2      | CTSL2 |

|             |         |         |         |
|-------------|---------|---------|---------|
| hsa-miR-656 | CTSO    | CTSO    | -       |
| hsa-miR-656 | CTSS    | CTSS    | -       |
| hsa-miR-656 | CTSZ    | CTSZ    | -       |
| hsa-miR-656 | CTTN    | CTTN    | -       |
| hsa-miR-656 | CTTNBP2 | CTTNBP2 | -       |
| hsa-miR-656 | CTXN2   | CTXN2   | -       |
| hsa-miR-656 | CUBN    | CUBN    | -       |
| hsa-miR-656 | CUL2    | CUL2    | -       |
| hsa-miR-656 | CUL5    | CUL5    | -       |
| hsa-miR-656 | CWC15   | CWC15   | -       |
| hsa-miR-656 | CXCL5   | CXCL5   | -       |
| hsa-miR-656 | CXorf21 | CXorf21 | -       |
| hsa-miR-656 | CXorf23 | CXorf23 | -       |
| hsa-miR-656 | CYB5A   | CYB5A   | -       |
| hsa-miR-656 | CYB5B   | CYB5B   | -       |
| hsa-miR-656 | CYBB    | CYBB    | -       |
| hsa-miR-656 | CYP1B1  | CYP1B1  | -       |
| hsa-miR-656 | CYP20A1 | -       | CYP20A1 |
| hsa-miR-656 | CYP26B1 | CYP26B1 | -       |
| hsa-miR-656 | CYP27C1 | CYP27C1 | -       |
| hsa-miR-656 | CYP2B6  | CYP2B6  | -       |
| hsa-miR-656 | CYP2U1  | CYP2U1  | -       |
| hsa-miR-656 | CYP4F2  | CYP4F2  | -       |
| hsa-miR-656 | CYP51A1 | CYP51A1 | -       |
| hsa-miR-656 | CYP8B1  | CYP8B1  | -       |
| hsa-miR-656 | CYTIP   | CYTIP   | -       |
| hsa-miR-656 | DACT1   | DACT1   | -       |
| hsa-miR-656 | DAGLA   | DAGLA   | -       |
| hsa-miR-656 | DARS2   | DARS2   | -       |
| hsa-miR-656 | DAZ1    | DAZ1    | -       |
| hsa-miR-656 | DAZ2    | DAZ2    | -       |
| hsa-miR-656 | DAZ3    | DAZ3    | -       |
| hsa-miR-656 | DAZ4    | DAZ4    | -       |
| hsa-miR-656 | DAZAP2  | DAZAP2  | -       |
| hsa-miR-656 | DBF4    | DBF4    | -       |
| hsa-miR-656 | DBNDD2  | DBNDD2  | -       |
| hsa-miR-656 | DBR1    | DBR1    | -       |
| hsa-miR-656 | DCAF10  | DCAF10  | -       |
| hsa-miR-656 | DCAF13  | DCAF13  | -       |
| hsa-miR-656 | DCAF17  | DCAF17  | -       |
| hsa-miR-656 | DCAF4L2 | DCAF4L2 | -       |
| hsa-miR-656 | DCAF8L1 | DCAF8L1 | -       |
| hsa-miR-656 | DCC     | DCC     | -       |
| hsa-miR-656 | DCDC2   | DCDC2   | -       |
| hsa-miR-656 | DCK     | DCK     | -       |
| hsa-miR-656 | DCLRE1A | DCLRE1A | -       |
| hsa-miR-656 | -       | DCP1B   | DCP1B   |
| hsa-miR-656 | DCUN1D1 | DCUN1D1 | -       |
| hsa-miR-656 | DCUN1D5 | DCUN1D5 | -       |
| hsa-miR-656 | DCX     | DCX     | -       |
| hsa-miR-656 | DDAH1   | DDAH1   | -       |

|             |         |         |   |
|-------------|---------|---------|---|
| hsa-miR-656 | DDHD2   | DDHD2   | - |
| hsa-miR-656 | DDR1    | DDR1    | - |
| hsa-miR-656 | DDX18   | DDX18   | - |
| hsa-miR-656 | DDX19A  | DDX19A  | - |
| hsa-miR-656 | DDX3X   | DDX3X   | - |
| hsa-miR-656 | DDX3Y   | DDX3Y   | - |
| hsa-miR-656 | DDX4    | DDX4    | - |
| hsa-miR-656 | DDX46   | DDX46   | - |
| hsa-miR-656 | DDX52   | DDX52   | - |
| hsa-miR-656 | DDX6    | DDX6    | - |
| hsa-miR-656 | DDX60   | DDX60   | - |
| hsa-miR-656 | DDX60L  | DDX60L  | - |
| hsa-miR-656 | DEFB125 | DEFB125 | - |
| hsa-miR-656 | DEFB132 | DEFB132 | - |
| hsa-miR-656 | DEGS1   | DEGS1   | - |
| hsa-miR-656 | DEK     | DEK     | - |
| hsa-miR-656 | DENND1B | DENND1B | - |
| hsa-miR-656 | DENND4A | DENND4A | - |
| hsa-miR-656 | DENND5B | DENND5B | - |
| hsa-miR-656 | DGKB    | DGKB    | - |
| hsa-miR-656 | DGKE    | DGKE    | - |
| hsa-miR-656 | DHFR    | DHFR    | - |
| hsa-miR-656 | DHFRL1  | DHFRL1  | - |
| hsa-miR-656 | DHH     | DHH     | - |
| hsa-miR-656 | DHX33   | DHX33   | - |
| hsa-miR-656 | DHX40   | DHX40   | - |
| hsa-miR-656 | DICER1  | DICER1  | - |
| hsa-miR-656 | DIMT1L  | DIMT1L  | - |
| hsa-miR-656 | DIP2A   | DIP2A   | - |
| hsa-miR-656 | DIP2C   | DIP2C   | - |
| hsa-miR-656 | DISC1   | DISC1   | - |
| hsa-miR-656 | DKK2    | DKK2    | - |
| hsa-miR-656 | DLAT    | DLAT    | - |
| hsa-miR-656 | DLG1    | DLG1    | - |
| hsa-miR-656 | DLG2    | DLG2    | - |
| hsa-miR-656 | DLG3    | DLG3    | - |
| hsa-miR-656 | DLGAP1  | DLGAP1  | - |
| hsa-miR-656 | DLL4    | DLL4    | - |
| hsa-miR-656 | DMC1    | DMC1    | - |
| hsa-miR-656 | DMD     | DMD     | - |
| hsa-miR-656 | DMGDH   | DMGDH   | - |
| hsa-miR-656 | DMXL1   | DMXL1   | - |
| hsa-miR-656 | DNAH14  | DNAH14  | - |
| hsa-miR-656 | DNAH5   | DNAH5   | - |
| hsa-miR-656 | DNAJB12 | DNAJB12 | - |
| hsa-miR-656 | DNAJB3  | DNAJB3  | - |
| hsa-miR-656 | DNAJB4  | DNAJB4  | - |
| hsa-miR-656 | DNAJB6  | DNAJB6  | - |
| hsa-miR-656 | DNAJB7  | DNAJB7  | - |
| hsa-miR-656 | DNAJC10 | DNAJC10 | - |
| hsa-miR-656 | DNAJC14 | DNAJC14 | - |

|             |         |          |          |
|-------------|---------|----------|----------|
| hsa-miR-656 | DNAJC18 | DNAJC18  | -        |
| hsa-miR-656 | DNAJC21 | DNAJC21  | -        |
| hsa-miR-656 | DNAJC25 | DNAJC25  | -        |
| hsa-miR-656 | DNAJC3  | DNAJC3   | -        |
| hsa-miR-656 | DNAJC6  | DNAJC6   | -        |
| hsa-miR-656 | DNAJC8  | DNAJC8   | -        |
| hsa-miR-656 | DNM3    | DNM3     | -        |
| hsa-miR-656 | -       | DNMT1    | DNMT1    |
| hsa-miR-656 | DNMT3B  | DNMT3B   | -        |
| hsa-miR-656 | DOCK10  | DOCK10   | -        |
| hsa-miR-656 | DOCK4   | DOCK4    | -        |
| hsa-miR-656 | -       | DOCK7    | DOCK7    |
| hsa-miR-656 | DOCK8   | DOCK8    | -        |
| hsa-miR-656 | DOK4    | DOK4     | -        |
| hsa-miR-656 | DOPEY2  | DOPEY2   | -        |
| hsa-miR-656 | DPF1    | DPF1     | -        |
| hsa-miR-656 | DPPA4   | DPPA4    | -        |
| hsa-miR-656 | DPY19L2 | DPY19L2  | -        |
| hsa-miR-656 | DPY19L3 | DPY19L3  | -        |
| hsa-miR-656 | DRAM1   | DRAM1    | -        |
| hsa-miR-656 | DSC2    | DSC2     | -        |
| hsa-miR-656 | DSC3    | DSC3     | -        |
| hsa-miR-656 | DSG3    | DSG3     | -        |
| hsa-miR-656 | DSTN    | DSTN     | -        |
| hsa-miR-656 | DTWD2   | DTWD2    | -        |
| hsa-miR-656 | DTX4    | DTX4     | -        |
| hsa-miR-656 | DUSP1   | DUSP1    | -        |
| hsa-miR-656 | DUSP10  | DUSP10   | -        |
| hsa-miR-656 | DUSP19  | DUSP19   | -        |
| hsa-miR-656 | DUSP3   | DUSP3    | -        |
| hsa-miR-656 | DUXA    | DUXA     | -        |
| hsa-miR-656 | DYNC1I2 | DYNC1I2  | -        |
| hsa-miR-656 | DYNC2H1 | DYNC2H1  | -        |
| hsa-miR-656 | -       | DYNC2LI1 | DYNC2LI1 |
| hsa-miR-656 | DYNLT3  | DYNLT3   | -        |
| hsa-miR-656 | DYRK2   | DYRK2    | -        |
| hsa-miR-656 | DZIP1   | DZIP1    | -        |
| hsa-miR-656 | DZIP1L  | DZIP1L   | -        |
| hsa-miR-656 | E2F3    | E2F3     | -        |
| hsa-miR-656 | E2F6    | E2F6     | -        |
| hsa-miR-656 | E2F7    | E2F7     | -        |
| hsa-miR-656 | -       | E2F8     | E2F8     |
| hsa-miR-656 | EBI3    | EBI3     | -        |
| hsa-miR-656 | ECT2L   | ECT2L    | -        |
| hsa-miR-656 | EDEM1   | EDEM1    | -        |
| hsa-miR-656 | EDEM3   | EDEM3    | -        |
| hsa-miR-656 | EDN1    | EDN1     | -        |
| hsa-miR-656 | EDNRA   | EDNRA    | -        |
| hsa-miR-656 | EDNRB   | EDNRB    | -        |
| hsa-miR-656 | EEA1    | EEA1     | -        |
| hsa-miR-656 | EEF1E1  | EEF1E1   | -        |



|             |          |          |        |
|-------------|----------|----------|--------|
| hsa-miR-656 | EFCAB1   | EFCAB1   | -      |
| hsa-miR-656 | EFHA2    | EFHA2    | -      |
| hsa-miR-656 | EFNB2    | EFNB2    | -      |
| hsa-miR-656 | EFR3A    | EFR3A    | -      |
| hsa-miR-656 | EGFL6    | EGFL6    | -      |
| hsa-miR-656 | EGR3     | EGR3     | -      |
| hsa-miR-656 | EHBP1    | EHBP1    | -      |
| hsa-miR-656 | EHD1     | EHD1     | -      |
| hsa-miR-656 | EHF      | EHF      | -      |
| hsa-miR-656 | EIF1AX   | EIF1AX   | -      |
| hsa-miR-656 | EIF1AY   | EIF1AY   | -      |
| hsa-miR-656 | EIF2AK3  | EIF2AK3  | -      |
| hsa-miR-656 | EIF2S3   | EIF2S3   | -      |
| hsa-miR-656 | -        | EIF4A1   | EIF4A1 |
| hsa-miR-656 | EIF4A2   | EIF4A2   | -      |
| hsa-miR-656 | EIF4E3   | EIF4E3   | -      |
| hsa-miR-656 | ELAVL4   | ELAVL4   | -      |
| hsa-miR-656 | ELF1     | ELF1     | -      |
| hsa-miR-656 | ELF2     | ELF2     | -      |
| hsa-miR-656 | ELL2     | ELL2     | -      |
| hsa-miR-656 | ELN      | ELN      | -      |
| hsa-miR-656 | ELOVL2   | ELOVL2   | -      |
| hsa-miR-656 | ELOVL4   | ELOVL4   | -      |
| hsa-miR-656 | ELOVL6   | ELOVL6   | -      |
| hsa-miR-656 | ELOVL7   | ELOVL7   | -      |
| hsa-miR-656 | ELTD1    | ELTD1    | -      |
| hsa-miR-656 | EMCN     | EMCN     | -      |
| hsa-miR-656 | EMILIN2  | EMILIN2  | -      |
| hsa-miR-656 | EML5     | EML5     | -      |
| hsa-miR-656 | EMR2     | EMR2     | -      |
| hsa-miR-656 | ENKUR    | ENKUR    | -      |
| hsa-miR-656 | ENOX2    | ENOX2    | -      |
| hsa-miR-656 | ENPEP    | ENPEP    | -      |
| hsa-miR-656 | ENPP1    | ENPP1    | -      |
| hsa-miR-656 | ENPP3    | ENPP3    | -      |
| hsa-miR-656 | ENSA     | ENSA     | -      |
| hsa-miR-656 | EPB41L2  | EPB41L2  | -      |
| hsa-miR-656 | EPB41L4B | EPB41L4B | -      |
| hsa-miR-656 | EPB41L5  | EPB41L5  | -      |
| hsa-miR-656 | EPHA3    | EPHA3    | -      |
| hsa-miR-656 | EPHA4    | EPHA4    | -      |
| hsa-miR-656 | EPHA5    | EPHA5    | -      |
| hsa-miR-656 | EPHB2    | EPHB2    | -      |
| hsa-miR-656 | EPM2A    | EPM2A    | -      |
| hsa-miR-656 | EPM2AIP1 | EPM2AIP1 | -      |
| hsa-miR-656 | EPS15    | EPS15    | -      |
| hsa-miR-656 | ERAP1    | ERAP1    | -      |
| hsa-miR-656 | ERAP2    | ERAP2    | -      |
| hsa-miR-656 | EREG     | EREG     | -      |
| hsa-miR-656 | ERI1     | ERI1     | -      |
| hsa-miR-656 | ERLEC1   | ERLEC1   | -      |

|             |          |          |       |
|-------------|----------|----------|-------|
| hsa-miR-656 | ERMP1    | ERMP1    | -     |
| hsa-miR-656 | ERO1L    | ERO1L    | -     |
| hsa-miR-656 | ERO1LB   | ERO1LB   | -     |
| hsa-miR-656 | ERP44    | ERP44    | -     |
| hsa-miR-656 | ERRFI1   | ERRFI1   | -     |
| hsa-miR-656 | ESR1     | ESR1     | -     |
| hsa-miR-656 | ESRRB    | ESRRB    | -     |
| hsa-miR-656 | ESRRG    | ESRRG    | -     |
| hsa-miR-656 | ESYT2    | ESYT2    | -     |
| hsa-miR-656 | ETNK1    | ETNK1    | -     |
| hsa-miR-656 | ETS2     | ETS2     | -     |
| hsa-miR-656 | ETV1     | ETV1     | -     |
| hsa-miR-656 | EVI2A    | EVI2A    | -     |
| hsa-miR-656 | -        | EWSR1    | EWSR1 |
| hsa-miR-656 | EXD1     | EXD1     | -     |
| hsa-miR-656 | EXOC8    | EXOC8    | -     |
| hsa-miR-656 | EXOSC2   | EXOSC2   | -     |
| hsa-miR-656 | EYA1     | EYA1     | -     |
| hsa-miR-656 | EYA4     | EYA4     | -     |
| hsa-miR-656 | EYS      | EYS      | -     |
| hsa-miR-656 | F3       | F3       | -     |
| hsa-miR-656 | F5       | F5       | -     |
| hsa-miR-656 | F9       | F9       | -     |
| hsa-miR-656 | FABP2    | FABP2    | -     |
| hsa-miR-656 | FADD     | FADD     | -     |
| hsa-miR-656 | FAM100B  | FAM100B  | -     |
| hsa-miR-656 | FAM102B  | FAM102B  | -     |
| hsa-miR-656 | FAM107B  | FAM107B  | -     |
| hsa-miR-656 | FAM108B1 | FAM108B1 | -     |
| hsa-miR-656 | FAM111A  | FAM111A  | -     |
| hsa-miR-656 | FAM117B  | FAM117B  | -     |
| hsa-miR-656 | FAM120C  | FAM120C  | -     |
| hsa-miR-656 | FAM122B  | FAM122B  | -     |
| hsa-miR-656 | FAM123B  | FAM123B  | -     |
| hsa-miR-656 | FAM126A  | FAM126A  | -     |
| hsa-miR-656 | FAM129A  | FAM129A  | -     |
| hsa-miR-656 | FAM131A  | FAM131A  | -     |
| hsa-miR-656 | FAM133A  | FAM133A  | -     |
| hsa-miR-656 | FAM136A  | FAM136A  | -     |
| hsa-miR-656 | FAM13B   | FAM13B   | -     |
| hsa-miR-656 | FAM154B  | FAM154B  | -     |
| hsa-miR-656 | FAM155A  | FAM155A  | -     |
| hsa-miR-656 | FAM160B1 | FAM160B1 | -     |
| hsa-miR-656 | FAM161A  | FAM161A  | -     |
| hsa-miR-656 | FAM169A  | FAM169A  | -     |
| hsa-miR-656 | FAM171B  | FAM171B  | -     |
| hsa-miR-656 | FAM177A1 | FAM177A1 | -     |
| hsa-miR-656 | FAM177B  | FAM177B  | -     |
| hsa-miR-656 | FAM184B  | FAM184B  | -     |
| hsa-miR-656 | FAM188A  | FAM188A  | -     |
| hsa-miR-656 | FAM18B2  | FAM18B2  | -     |

|             |          |          |         |
|-------------|----------|----------|---------|
| hsa-miR-656 | FAM190A  | FAM190A  | -       |
| hsa-miR-656 | FAM190B  | FAM190B  | -       |
| hsa-miR-656 | FAM198B  | FAM198B  | -       |
| hsa-miR-656 | FAM199X  | FAM199X  | -       |
| hsa-miR-656 | FAM19A1  | FAM19A1  | -       |
| hsa-miR-656 | FAM200B  | FAM200B  | -       |
| hsa-miR-656 | FAM22D   | FAM22D   | -       |
| hsa-miR-656 | FAM60A   | FAM60A   | -       |
| hsa-miR-656 | FAM63B   | FAM63B   | -       |
| hsa-miR-656 | FAM65A   | FAM65A   | -       |
| hsa-miR-656 | FAM73A   | FAM73A   | -       |
| hsa-miR-656 | FAM75A2  | FAM75A2  | -       |
| hsa-miR-656 | FAM76A   | FAM76A   | -       |
| hsa-miR-656 | FAM76B   | FAM76B   | -       |
| hsa-miR-656 | FAM89A   | FAM89A   | -       |
| hsa-miR-656 | -        | FAM91A1  | FAM91A1 |
| hsa-miR-656 | FANCE    | FANCE    | -       |
| hsa-miR-656 | FAR1     | FAR1     | -       |
| hsa-miR-656 | FAS      | FAS      | -       |
| hsa-miR-656 | FASLG    | FASLG    | -       |
| hsa-miR-656 | FBLN7    | FBLN7    | -       |
| hsa-miR-656 | FBN2     | FBN2     | -       |
| hsa-miR-656 | FBXL3    | FBXL3    | -       |
| hsa-miR-656 | FBXO11   | FBXO11   | -       |
| hsa-miR-656 | FBXO22   | FBXO22   | -       |
| hsa-miR-656 | FBXO25   | FBXO25   | -       |
| hsa-miR-656 | FBXO27   | FBXO27   | -       |
| hsa-miR-656 | FBXO28   | FBXO28   | -       |
| hsa-miR-656 | FBXO30   | FBXO30   | -       |
| hsa-miR-656 | FBXO33   | FBXO33   | -       |
| hsa-miR-656 | FBXO4    | FBXO4    | -       |
| hsa-miR-656 | FBXO43   | FBXO43   | -       |
| hsa-miR-656 | FBXO45   | FBXO45   | -       |
| hsa-miR-656 | FBXO47   | FBXO47   | -       |
| hsa-miR-656 | FBXO48   | FBXO48   | -       |
| hsa-miR-656 | FBXO8    | FBXO8    | -       |
| hsa-miR-656 | FBXW7    | FBXW7    | -       |
| hsa-miR-656 | FCHO2    | FCHO2    | -       |
| hsa-miR-656 | FCRL1    | FCRL1    | -       |
| hsa-miR-656 | FECH     | FECH     | -       |
| hsa-miR-656 | FEM1C    | FEM1C    | -       |
| hsa-miR-656 | FGD4     | FGD4     | -       |
| hsa-miR-656 | FGD6     | FGD6     | -       |
| hsa-miR-656 | FGF12    | FGF12    | -       |
| hsa-miR-656 | FGF14    | FGF14    | -       |
| hsa-miR-656 | FGF5     | FGF5     | -       |
| hsa-miR-656 | FGFBP3   | FGFBP3   | -       |
| hsa-miR-656 | FGFR1OP2 | FGFR1OP2 | -       |
| hsa-miR-656 | FGFR2    | FGFR2    | -       |
| hsa-miR-656 | FGFRL1   | FGFRL1   | -       |
| hsa-miR-656 | FGL2     | FGL2     | -       |

|             |          |          |        |
|-------------|----------|----------|--------|
| hsa-miR-656 | -        | FIP1L1   | FIP1L1 |
| hsa-miR-656 | FKBP14   | FKBP14   | -      |
| hsa-miR-656 | FKBP3    | FKBP3    | -      |
| hsa-miR-656 | FKBP5    | FKBP5    | -      |
| hsa-miR-656 | FLI1     | FLI1     | -      |
| hsa-miR-656 | FLJ42280 | FLJ42280 | -      |
| hsa-miR-656 | FLRT1    | FLRT1    | -      |
| hsa-miR-656 | FLRT2    | FLRT2    | -      |
| hsa-miR-656 | FLT1     | FLT1     | -      |
| hsa-miR-656 | FLT3     | FLT3     | -      |
| hsa-miR-656 | FLVCR1   | FLVCR1   | -      |
| hsa-miR-656 | FMNL2    | FMNL2    | -      |
| hsa-miR-656 | FMO2     | FMO2     | -      |
| hsa-miR-656 | FMOD     | FMOD     | -      |
| hsa-miR-656 | FMR1     | FMR1     | -      |
| hsa-miR-656 | FN3KRP   | FN3KRP   | -      |
| hsa-miR-656 | FNDC3A   | FNDC3A   | -      |
| hsa-miR-656 | FNDC3B   | FNDC3B   | -      |
| hsa-miR-656 | FOXF1    | FOXF1    | -      |
| hsa-miR-656 | FOXJ2    | FOXJ2    | -      |
| hsa-miR-656 | FOXN2    | FOXN2    | -      |
| hsa-miR-656 | FOXN3    | FOXN3    | -      |
| hsa-miR-656 | FREM2    | FREM2    | -      |
| hsa-miR-656 | FRMD4B   | FRMD4B   | -      |
| hsa-miR-656 | FRMPD4   | FRMPD4   | -      |
| hsa-miR-656 | FRS2     | FRS2     | -      |
| hsa-miR-656 | FRS3     | FRS3     | -      |
| hsa-miR-656 | FRY      | FRY      | -      |
| hsa-miR-656 | FRYL     | FRYL     | -      |
| hsa-miR-656 | FSD1L    | FSD1L    | -      |
| hsa-miR-656 | FSHB     | FSHB     | -      |
| hsa-miR-656 | FSTL5    | FSTL5    | -      |
| hsa-miR-656 | FTSJ1    | FTSJ1    | -      |
| hsa-miR-656 | -        | FUBP1    | FUBP1  |
| hsa-miR-656 | FUBP3    | FUBP3    | -      |
| hsa-miR-656 | FUNDC2   | FUNDC2   | -      |
| hsa-miR-656 | FUT10    | FUT10    | -      |
| hsa-miR-656 | FYB      | FYB      | -      |
| hsa-miR-656 | FZD5     | FZD5     | -      |
| hsa-miR-656 | FZD6     | FZD6     | -      |
| hsa-miR-656 | G2E3     | G2E3     | -      |
| hsa-miR-656 | GABRA1   | GABRA1   | -      |
| hsa-miR-656 | GABRA5   | GABRA5   | -      |
| hsa-miR-656 | GABRB2   | GABRB2   | -      |
| hsa-miR-656 | GABRB3   | GABRB3   | -      |
| hsa-miR-656 | GABRG1   | GABRG1   | -      |
| hsa-miR-656 | GABRP    | GABRP    | -      |
| hsa-miR-656 | GAD1     | GAD1     | -      |
| hsa-miR-656 | GALNT12  | GALNT12  | -      |
| hsa-miR-656 | GALNTL2  | GALNTL2  | -      |
| hsa-miR-656 | GAN      | GAN      | -      |

|             |          |          |        |
|-------------|----------|----------|--------|
| hsa-miR-656 | GANC     | GANC     | -      |
| hsa-miR-656 | GAS7     | GAS7     | -      |
| hsa-miR-656 | GATA3    | GATA3    | -      |
| hsa-miR-656 | GBA3     | GBA3     | -      |
| hsa-miR-656 | GBE1     | GBE1     | -      |
| hsa-miR-656 | GBP7     | GBP7     | -      |
| hsa-miR-656 | GCA      | GCA      | -      |
| hsa-miR-656 | GCC1     | GCC1     | -      |
| hsa-miR-656 | GCET2    | GCET2    | -      |
| hsa-miR-656 | GCLC     | GCLC     | -      |
| hsa-miR-656 | GCLM     | GCLM     | -      |
| hsa-miR-656 | GDA      | GDA      | -      |
| hsa-miR-656 | GDF10    | GDF10    | -      |
| hsa-miR-656 | GDF6     | GDF6     | -      |
| hsa-miR-656 | GDPD1    | GDPD1    | -      |
| hsa-miR-656 | GDPD4    | GDPD4    | -      |
| hsa-miR-656 | GFPT1    | GFPT1    | -      |
| hsa-miR-656 | GFRAL    | GFRAL    | -      |
| hsa-miR-656 | GGCT     | GGCT     | -      |
| hsa-miR-656 | GIGYF2   | GIGYF2   | -      |
| hsa-miR-656 | -        | GIMAP7   | GIMAP7 |
| hsa-miR-656 | GINS1    | GINS1    | -      |
| hsa-miR-656 | GINS3    | GINS3    | -      |
| hsa-miR-656 | GJA3     | GJA3     | -      |
| hsa-miR-656 | GJC1     | GJC1     | -      |
| hsa-miR-656 | GK       | GK       | -      |
| hsa-miR-656 | GK2      | GK2      | -      |
| hsa-miR-656 | GLCCI1   | GLCCI1   | -      |
| hsa-miR-656 | GLIPR1   | GLIPR1   | -      |
| hsa-miR-656 | GLIPR1L1 | GLIPR1L1 | -      |
| hsa-miR-656 | GLRA3    | GLRA3    | -      |
| hsa-miR-656 | GLRB     | GLRB     | -      |
| hsa-miR-656 | GLUD1    | GLUD1    | -      |
| hsa-miR-656 | GMPR     | GMPR     | -      |
| hsa-miR-656 | GNA13    | GNA13    | -      |
| hsa-miR-656 | GNAI1    | GNAI1    | -      |
| hsa-miR-656 | GNAT1    | GNAT1    | -      |
| hsa-miR-656 | GNE      | GNE      | -      |
| hsa-miR-656 | GNG12    | GNG12    | -      |
| hsa-miR-656 | GNG2     | GNG2     | -      |
| hsa-miR-656 | GNG4     | GNG4     | -      |
| hsa-miR-656 | GNG5     | GNG5     | -      |
| hsa-miR-656 | GNPDA2   | GNPDA2   | -      |
| hsa-miR-656 | GNRHR    | GNRHR    | -      |
| hsa-miR-656 | GOLGA3   | GOLGA3   | -      |
| hsa-miR-656 | GOLGA4   | GOLGA4   | -      |
| hsa-miR-656 | GOLGA8A  | GOLGA8A  | -      |
| hsa-miR-656 | GOLGA8B  | GOLGA8B  | -      |
| hsa-miR-656 | GOLPH3   | GOLPH3   | -      |
| hsa-miR-656 | GORAB    | GORAB    | -      |
| hsa-miR-656 | GPATCH8  | GPATCH8  | -      |

|             |         |         |        |
|-------------|---------|---------|--------|
| hsa-miR-656 | GPC5    | GPC5    | -      |
| hsa-miR-656 | GPC6    | GPC6    | -      |
| hsa-miR-656 | GPCPD1  | GPCPD1  | -      |
| hsa-miR-656 | GPD1L   | GPD1L   | -      |
| hsa-miR-656 | GPD2    | GPD2    | -      |
| hsa-miR-656 | -       | GPKOW   | GPKOW  |
| hsa-miR-656 | GPM6B   | GPM6B   | -      |
| hsa-miR-656 | GPR113  | GPR113  | -      |
| hsa-miR-656 | GPR12   | GPR12   | -      |
| hsa-miR-656 | GPR124  | GPR124  | -      |
| hsa-miR-656 | GPR125  | GPR125  | -      |
| hsa-miR-656 | GPR126  | GPR126  | -      |
| hsa-miR-656 | GPR155  | GPR155  | -      |
| hsa-miR-656 | GPR85   | GPR85   | -      |
| hsa-miR-656 | GPR88   | GPR88   | -      |
| hsa-miR-656 | GPRASP1 | GPRASP1 | -      |
| hsa-miR-656 | GPRIN3  | GPRIN3  | -      |
| hsa-miR-656 | GPX8    | GPX8    | -      |
| hsa-miR-656 | GRAP2   | GRAP2   | -      |
| hsa-miR-656 | GREB1   | GREB1   | -      |
| hsa-miR-656 | GRHL1   | GRHL1   | -      |
| hsa-miR-656 | GRHL2   | GRHL2   | -      |
| hsa-miR-656 | GRIA2   | GRIA2   | -      |
| hsa-miR-656 | GRIA4   | GRIA4   | -      |
| hsa-miR-656 | GRIK2   | GRIK2   | -      |
| hsa-miR-656 | GRIK3   | GRIK3   | -      |
| hsa-miR-656 | GRIN2A  | GRIN2A  | -      |
| hsa-miR-656 | GRIPAP1 | GRIPAP1 | -      |
| hsa-miR-656 | GRM1    | GRM1    | -      |
| hsa-miR-656 | GRM5    | GRM5    | -      |
| hsa-miR-656 | GRPR    | GRPR    | -      |
| hsa-miR-656 | GRTP1   | GRTP1   | -      |
| hsa-miR-656 | GSTCD   | GSTCD   | -      |
| hsa-miR-656 | GTF3C3  | GTF3C3  | -      |
| hsa-miR-656 | GTPBP10 | GTPBP10 | -      |
| hsa-miR-656 | GXYLT1  | GXYLT1  | -      |
| hsa-miR-656 | GYP A   | GYP A   | -      |
| hsa-miR-656 | H3F3B   | H3F3B   | -      |
| hsa-miR-656 | HACE1   | HACE1   | -      |
| hsa-miR-656 | HADH    | HADH    | -      |
| hsa-miR-656 | HAPLN1  | HAPLN1  | -      |
| hsa-miR-656 | -       | HAT1    | HAT1   |
| hsa-miR-656 | HAUS3   | HAUS3   | -      |
| hsa-miR-656 | HBEGF   | HBEGF   | -      |
| hsa-miR-656 | HCFC2   | HCFC2   | -      |
| hsa-miR-656 | HCN1    | HCN1    | -      |
| hsa-miR-656 | HDAC2   | HDAC2   | -      |
| hsa-miR-656 | HDAC4   | HDAC4   | -      |
| hsa-miR-656 | HDAC9   | HDAC9   | -      |
| hsa-miR-656 | HDHD2   | HDHD2   | -      |
| hsa-miR-656 | HEATR1  | -       | HEATR1 |

|             |           |           |        |
|-------------|-----------|-----------|--------|
| hsa-miR-656 | HEATR5A   | HEATR5A   | -      |
| hsa-miR-656 | HECTD2    | HECTD2    | -      |
| hsa-miR-656 | HECW1     | HECW1     | -      |
| hsa-miR-656 | HECW2     | HECW2     | -      |
| hsa-miR-656 | HEPH      | HEPH      | -      |
| hsa-miR-656 | HEPHL1    | HEPHL1    | -      |
| hsa-miR-656 | HERPUD1   | HERPUD1   | -      |
| hsa-miR-656 | HHAT      | HHAT      | -      |
| hsa-miR-656 | HHIP      | HHIP      | -      |
| hsa-miR-656 | HIATL1    | HIATL1    | -      |
| hsa-miR-656 | HIC2      | HIC2      | -      |
| hsa-miR-656 | HIF1A     | HIF1A     | -      |
| hsa-miR-656 | HIGD1A    | HIGD1A    | -      |
| hsa-miR-656 | HINT3     | HINT3     | -      |
| hsa-miR-656 | HIPK1     | HIPK1     | -      |
| hsa-miR-656 | HIST1H2BD | HIST1H2BD | -      |
| hsa-miR-656 | HIVEP2    | HIVEP2    | -      |
| hsa-miR-656 | HK1       | HK1       | -      |
| hsa-miR-656 | HLA-DQA1  | HLA-DQA1  | -      |
| hsa-miR-656 | HLTF      | HLTF      | -      |
| hsa-miR-656 | HMCN1     | HMCN1     | -      |
| hsa-miR-656 | HMGCLL1   | HMGCLL1   | -      |
| hsa-miR-656 | HMGCS2    | HMGCS2    | -      |
| hsa-miR-656 | HMGN3     | HMGN3     | -      |
| hsa-miR-656 | HMGN5     | HMGN5     | -      |
| hsa-miR-656 | HN1L      | HN1L      | -      |
| hsa-miR-656 | HNF4G     | HNF4G     | -      |
| hsa-miR-656 | HNRNPA0   | HNRNPA0   | -      |
| hsa-miR-656 | HNRPLL    | HNRPLL    | -      |
| hsa-miR-656 | HOPX      | HOPX      | -      |
| hsa-miR-656 | HORMAD1   | HORMAD1   | -      |
| hsa-miR-656 | HOXA1     | HOXA1     | -      |
| hsa-miR-656 | HOXA11    | HOXA11    | -      |
| hsa-miR-656 | HOXA3     | HOXA3     | -      |
| hsa-miR-656 | HOXA7     | HOXA7     | -      |
| hsa-miR-656 | HOXB4     | HOXB4     | -      |
| hsa-miR-656 | HOXC4     | HOXC4     | -      |
| hsa-miR-656 | HOXC9     | HOXC9     | -      |
| hsa-miR-656 | -         | HP1BP3    | HP1BP3 |
| hsa-miR-656 | HPCAL1    | HPCAL1    | -      |
| hsa-miR-656 | HPS4      | HPS4      | -      |
| hsa-miR-656 | HS2ST1    | HS2ST1    | -      |
| hsa-miR-656 | -         | HS3ST1    | HS3ST1 |
| hsa-miR-656 | HS3ST3A1  | HS3ST3A1  | -      |
| hsa-miR-656 | HS3ST5    | HS3ST5    | -      |
| hsa-miR-656 | HS6ST2    | HS6ST2    | -      |
| hsa-miR-656 | HS6ST3    | HS6ST3    | -      |
| hsa-miR-656 | HSD11B1   | HSD11B1   | -      |
| hsa-miR-656 | HSD17B12  | HSD17B12  | -      |
| hsa-miR-656 | HSD17B13  | HSD17B13  | -      |
| hsa-miR-656 | HSDL1     | HSDL1     | -      |

|             |          |          |          |
|-------------|----------|----------|----------|
| hsa-miR-656 | HSF5     | HSF5     | -        |
| hsa-miR-656 | HSP90AA1 | HSP90AA1 | -        |
| hsa-miR-656 | HSPC159  | HSPC159  | -        |
| hsa-miR-656 | HTR1D    | HTR1D    | -        |
| hsa-miR-656 | HTR1F    | HTR1F    | -        |
| hsa-miR-656 | ICA1L    | ICA1L    | -        |
| hsa-miR-656 | ICK      | ICK      | -        |
| hsa-miR-656 | IDS      | IDS      | -        |
| hsa-miR-656 | IFI44L   | IFI44L   | -        |
| hsa-miR-656 | IFNA16   | IFNA16   | -        |
| hsa-miR-656 | IFNAR1   | IFNAR1   | -        |
| hsa-miR-656 | IFNG     | IFNG     | -        |
| hsa-miR-656 | IFT27    | IFT27    | -        |
| hsa-miR-656 | IGF1     | IGF1     | -        |
| hsa-miR-656 | IGF2BP2  | IGF2BP2  | -        |
| hsa-miR-656 | IGF2R    | IGF2R    | -        |
| hsa-miR-656 | IKZF4    | IKZF4    | -        |
| hsa-miR-656 | IL17F    | IL17F    | -        |
| hsa-miR-656 | IL1A     | IL1A     | -        |
| hsa-miR-656 | -        | IL1F10   | IL1F10   |
| hsa-miR-656 | IL1RAP   | IL1RAP   | -        |
| hsa-miR-656 | IL20     | IL20     | -        |
| hsa-miR-656 | IL20RA   | IL20RA   | -        |
| hsa-miR-656 | IL6R     | IL6R     | -        |
| hsa-miR-656 | IL7      | IL7      | -        |
| hsa-miR-656 | IL8      | IL8      | -        |
| hsa-miR-656 | IMPA1    | IMPA1    | -        |
| hsa-miR-656 | IMPAD1   | IMPAD1   | -        |
| hsa-miR-656 | ING5     | ING5     | -        |
| hsa-miR-656 | INPP4A   | INPP4A   | -        |
| hsa-miR-656 | INPP5A   | INPP5A   | -        |
| hsa-miR-656 | INPP5B   | INPP5B   | -        |
| hsa-miR-656 | INPP5D   | INPP5D   | -        |
| hsa-miR-656 | INSC     | INSC     | -        |
| hsa-miR-656 | INSIG1   | INSIG1   | -        |
| hsa-miR-656 | INTS2    | INTS2    | -        |
| hsa-miR-656 | INTS6    | INTS6    | -        |
| hsa-miR-656 | -        | INTS8    | INTS8    |
| hsa-miR-656 | IPMK     | IPMK     | -        |
| hsa-miR-656 | IPO5     | IPO5     | -        |
| hsa-miR-656 | IPO8     | IPO8     | -        |
| hsa-miR-656 | IPP      | IPP      | -        |
| hsa-miR-656 | IPPK     | IPPK     | -        |
| hsa-miR-656 | -        | IRAK1BP1 | IRAK1BP1 |
| hsa-miR-656 | IRAK3    | IRAK3    | -        |
| hsa-miR-656 | IREB2    | IREB2    | -        |
| hsa-miR-656 | IRF5     | IRF5     | -        |
| hsa-miR-656 | IRF6     | IRF6     | -        |
| hsa-miR-656 | IRS1     | IRS1     | -        |
| hsa-miR-656 | IRS2     | IRS2     | -        |
| hsa-miR-656 | IRX2     | IRX2     | -        |



|             |           |           |   |
|-------------|-----------|-----------|---|
| hsa-miR-656 | IRX5      | IRX5      | - |
| hsa-miR-656 | ISCA1     | ISCA1     | - |
| hsa-miR-656 | ITGA2     | ITGA2     | - |
| hsa-miR-656 | ITGB8     | ITGB8     | - |
| hsa-miR-656 | ITPK1     | ITPK1     | - |
| hsa-miR-656 | ITPR2     | ITPR2     | - |
| hsa-miR-656 | ITPRIPL2  | ITPRIPL2  | - |
| hsa-miR-656 | JAGN1     | JAGN1     | - |
| hsa-miR-656 | JAKMIP1   | JAKMIP1   | - |
| hsa-miR-656 | JAZF1     | JAZF1     | - |
| hsa-miR-656 | JHDM1D    | JHDM1D    | - |
| hsa-miR-656 | JMY       | JMY       | - |
| hsa-miR-656 | KAL1      | KAL1      | - |
| hsa-miR-656 | KALRN     | KALRN     | - |
| hsa-miR-656 | KANK1     | KANK1     | - |
| hsa-miR-656 | KAT2B     | KAT2B     | - |
| hsa-miR-656 | KBTBD2    | KBTBD2    | - |
| hsa-miR-656 | KBTBD6    | KBTBD6    | - |
| hsa-miR-656 | KCNAB1    | KCNAB1    | - |
| hsa-miR-656 | KCND2     | KCND2     | - |
| hsa-miR-656 | KCNE3     | KCNE3     | - |
| hsa-miR-656 | KCNG3     | KCNG3     | - |
| hsa-miR-656 | KCNH5     | KCNH5     | - |
| hsa-miR-656 | KCNIP4    | KCNIP4    | - |
| hsa-miR-656 | KCNJ10    | KCNJ10    | - |
| hsa-miR-656 | KCNMA1    | KCNMA1    | - |
| hsa-miR-656 | KCNMB2    | KCNMB2    | - |
| hsa-miR-656 | KCNT2     | KCNT2     | - |
| hsa-miR-656 | KCTD12    | KCTD12    | - |
| hsa-miR-656 | KCTD16    | KCTD16    | - |
| hsa-miR-656 | KCTD18    | KCTD18    | - |
| hsa-miR-656 | KCTD9     | KCTD9     | - |
| hsa-miR-656 | KDELC2    | KDELC2    | - |
| hsa-miR-656 | KDM1B     | KDM1B     | - |
| hsa-miR-656 | KDM2A     | KDM2A     | - |
| hsa-miR-656 | KDM5A     | KDM5A     | - |
| hsa-miR-656 | KDM5C     | KDM5C     | - |
| hsa-miR-656 | KDM6A     | KDM6A     | - |
| hsa-miR-656 | KDR       | KDR       | - |
| hsa-miR-656 | KIAA0090  | KIAA0090  | - |
| hsa-miR-656 | KIAA0141  | KIAA0141  | - |
| hsa-miR-656 | KIAA0196  | KIAA0196  | - |
| hsa-miR-656 | KIAA0240  | KIAA0240  | - |
| hsa-miR-656 | KIAA0355  | KIAA0355  | - |
| hsa-miR-656 | KIAA0408  | KIAA0408  | - |
| hsa-miR-656 | KIAA0494  | KIAA0494  | - |
| hsa-miR-656 | KIAA0528  | KIAA0528  | - |
| hsa-miR-656 | KIAA0564  | KIAA0564  | - |
| hsa-miR-656 | KIAA0895L | KIAA0895L | - |
| hsa-miR-656 | KIAA1024  | KIAA1024  | - |
| hsa-miR-656 | KIAA1107  | KIAA1107  | - |

|             |           |           |       |
|-------------|-----------|-----------|-------|
| hsa-miR-656 | KIAA1143  | KIAA1143  | -     |
| hsa-miR-656 | KIAA1147  | KIAA1147  | -     |
| hsa-miR-656 | KIAA1217  | KIAA1217  | -     |
| hsa-miR-656 | KIAA1244  | KIAA1244  | -     |
| hsa-miR-656 | KIAA1279  | KIAA1279  | -     |
| hsa-miR-656 | KIAA1377  | KIAA1377  | -     |
| hsa-miR-656 | KIAA1383  | KIAA1383  | -     |
| hsa-miR-656 | KIAA1432  | KIAA1432  | -     |
| hsa-miR-656 | KIAA1486  | KIAA1486  | -     |
| hsa-miR-656 | KIAA1804  | KIAA1804  | -     |
| hsa-miR-656 | KIAA1826  | KIAA1826  | -     |
| hsa-miR-656 | KIAA1841  | KIAA1841  | -     |
| hsa-miR-656 | KIAA2018  | KIAA2018  | -     |
| hsa-miR-656 | KIF13A    | KIF13A    | -     |
| hsa-miR-656 | KIF14     | KIF14     | -     |
| hsa-miR-656 | KIF15     | KIF15     | -     |
| hsa-miR-656 | KIF1B     | KIF1B     | -     |
| hsa-miR-656 | KIF20B    | KIF20B    | -     |
| hsa-miR-656 | KIF21A    | KIF21A    | -     |
| hsa-miR-656 | KIF5B     | KIF5B     | -     |
| hsa-miR-656 | KIF7      | KIF7      | -     |
| hsa-miR-656 | KL        | KL        | -     |
| hsa-miR-656 | KLB       | KLB       | -     |
| hsa-miR-656 | KLC1      | KLC1      | -     |
| hsa-miR-656 | KLF3      | KLF3      | -     |
| hsa-miR-656 | KLF4      | KLF4      | -     |
| hsa-miR-656 | KLF5      | KLF5      | -     |
| hsa-miR-656 | KLF6      | KLF6      | -     |
| hsa-miR-656 | KLF8      | KLF8      | -     |
| hsa-miR-656 | KLF9      | KLF9      | -     |
| hsa-miR-656 | KLHL15    | KLHL15    | -     |
| hsa-miR-656 | KLHL20    | KLHL20    | -     |
| hsa-miR-656 | KLHL28    | KLHL28    | -     |
| hsa-miR-656 | KLHL31    | KLHL31    | -     |
| hsa-miR-656 | KLHL4     | KLHL4     | -     |
| hsa-miR-656 | KLHL5     | KLHL5     | -     |
| hsa-miR-656 | KLHL7     | KLHL7     | -     |
| hsa-miR-656 | KLK2      | KLK2      | -     |
| hsa-miR-656 | KLRD1     | KLRD1     | -     |
| hsa-miR-656 | -         | KLRF1     | KLRF1 |
| hsa-miR-656 | KMO       | KMO       | -     |
| hsa-miR-656 | KPNA3     | KPNA3     | -     |
| hsa-miR-656 | KPNA4     | KPNA4     | -     |
| hsa-miR-656 | KPNB1     | KPNB1     | -     |
| hsa-miR-656 | -         | KRCC1     | KRCC1 |
| hsa-miR-656 | KREMEN1   | KREMEN1   | -     |
| hsa-miR-656 | KRT23     | KRT23     | -     |
| hsa-miR-656 | KRTAP1-3  | KRTAP1-3  | -     |
| hsa-miR-656 | KRTAP20-3 | KRTAP20-3 | -     |
| hsa-miR-656 | KRTAP4-5  | KRTAP4-5  | -     |
| hsa-miR-656 | -         | KTN1      | KTN1  |

|             |              |              |       |
|-------------|--------------|--------------|-------|
| hsa-miR-656 | KYNU         | KYNU         | -     |
| hsa-miR-656 | L1CAM        | L1CAM        | -     |
| hsa-miR-656 | L2HGDH       | L2HGDH       | -     |
| hsa-miR-656 | L3MBTL4      | L3MBTL4      | -     |
| hsa-miR-656 | LACE1        | LACE1        | -     |
| hsa-miR-656 | LAGE3        | LAGE3        | -     |
| hsa-miR-656 | -            | LAMA3        | LAMA3 |
| hsa-miR-656 | LAMA4        | LAMA4        | -     |
| hsa-miR-656 | LAMC1        | LAMC1        | -     |
| hsa-miR-656 | LAMP2        | LAMP2        | -     |
| hsa-miR-656 | LAMP3        | LAMP3        | -     |
| hsa-miR-656 | LARP1        | LARP1        | -     |
| hsa-miR-656 | LARP4        | LARP4        | -     |
| hsa-miR-656 | LARP6        | LARP6        | -     |
| hsa-miR-656 | LAX1         | LAX1         | -     |
| hsa-miR-656 | LBR          | LBR          | -     |
| hsa-miR-656 | LCA5         | LCA5         | -     |
| hsa-miR-656 | LCOR         | LCOR         | -     |
| hsa-miR-656 | LCORL        | LCORL        | -     |
| hsa-miR-656 | LDB1         | LDB1         | -     |
| hsa-miR-656 | LDLRAD2      | LDLRAD2      | -     |
| hsa-miR-656 | LEKR1        | LEKR1        | -     |
| hsa-miR-656 | LEMD3        | LEMD3        | -     |
| hsa-miR-656 | LEPR         | LEPR         | -     |
| hsa-miR-656 | LGR4         | LGR4         | -     |
| hsa-miR-656 | LGSN         | LGSN         | -     |
| hsa-miR-656 | LHFP         | LHFP         | -     |
| hsa-miR-656 | LHFPL3       | LHFPL3       | -     |
| hsa-miR-656 | LILRB4       | LILRB4       | -     |
| hsa-miR-656 | LIMCH1       | LIMCH1       | -     |
| hsa-miR-656 | LIMS1        | LIMS1        | -     |
| hsa-miR-656 | LIN54        | LIN54        | -     |
| hsa-miR-656 | LIN7C        | LIN7C        | -     |
| hsa-miR-656 | LIN9         | LIN9         | -     |
| hsa-miR-656 | LIX1         | LIX1         | -     |
| hsa-miR-656 | LMAN1        | LMAN1        | -     |
| hsa-miR-656 | LMLN         | LMLN         | -     |
| hsa-miR-656 | LMO3         | LMO3         | -     |
| hsa-miR-656 | LMO4         | LMO4         | -     |
| hsa-miR-656 | LMO7         | LMO7         | -     |
| hsa-miR-656 | LMOD1        | LMOD1        | -     |
| hsa-miR-656 | LMOD3        | LMOD3        | -     |
| hsa-miR-656 | LMX1A        | LMX1A        | -     |
| hsa-miR-656 | LNX2         | LNX2         | -     |
| hsa-miR-656 | LOC100132247 | LOC100132247 | -     |
| hsa-miR-656 | LOC147670    | LOC147670    | -     |
| hsa-miR-656 | LOXL3        | LOXL3        | -     |
| hsa-miR-656 | LOXL4        | LOXL4        | -     |
| hsa-miR-656 | LPAR1        | LPAR1        | -     |
| hsa-miR-656 | LPAR4        | LPAR4        | -     |
| hsa-miR-656 | LPCAT2       | LPCAT2       | -     |

|             |          |          |        |
|-------------|----------|----------|--------|
| hsa-miR-656 | LPP      | LPP      | -      |
| hsa-miR-656 | LPPR1    | LPPR1    | -      |
| hsa-miR-656 | LPPR5    | LPPR5    | -      |
| hsa-miR-656 | LRBA     | LRBA     | -      |
| hsa-miR-656 | LRCH1    | LRCH1    | -      |
| hsa-miR-656 | LRIT2    | LRIT2    | -      |
| hsa-miR-656 | LRMP     | LRMP     | -      |
| hsa-miR-656 | LRP11    | LRP11    | -      |
| hsa-miR-656 | LRP12    | LRP12    | -      |
| hsa-miR-656 | LRP1B    | LRP1B    | -      |
| hsa-miR-656 | LRP4     | LRP4     | -      |
| hsa-miR-656 | LRPPRC   | LRPPRC   | -      |
| hsa-miR-656 | LRRC15   | LRRC15   | -      |
| hsa-miR-656 | LRRC19   | LRRC19   | -      |
| hsa-miR-656 | LRRC27   | LRRC27   | -      |
| hsa-miR-656 | LRRC31   | LRRC31   | -      |
| hsa-miR-656 | LRRC34   | LRRC34   | -      |
| hsa-miR-656 | -        | LRRC39   | LRRC39 |
| hsa-miR-656 | LRRC4    | LRRC4    | -      |
| hsa-miR-656 | LRRC57   | LRRC57   | -      |
| hsa-miR-656 | LRRC58   | LRRC58   | -      |
| hsa-miR-656 | LRRC8B   | LRRC8B   | -      |
| hsa-miR-656 | -        | LRRIQ1   | LRRIQ1 |
| hsa-miR-656 | LUC7L3   | LUC7L3   | -      |
| hsa-miR-656 | LUZP2    | LUZP2    | -      |
| hsa-miR-656 | LUZP4    | LUZP4    | -      |
| hsa-miR-656 | LY9      | LY9      | -      |
| hsa-miR-656 | LYPLA1   | LYPLA1   | -      |
| hsa-miR-656 | LYPLAL1  | LYPLAL1  | -      |
| hsa-miR-656 | LYRM2    | LYRM2    | -      |
| hsa-miR-656 | LYRM5    | LYRM5    | -      |
| hsa-miR-656 | LYRM7    | LYRM7    | -      |
| hsa-miR-656 | LYSMD2   | LYSMD2   | -      |
| hsa-miR-656 | LYSMD3   | LYSMD3   | -      |
| hsa-miR-656 | LYVE1    | LYVE1    | -      |
| hsa-miR-656 | LYZ      | LYZ      | -      |
| hsa-miR-656 | MAB21L1  | MAB21L1  | -      |
| hsa-miR-656 | MACC1    | MACC1    | -      |
| hsa-miR-656 | MAF      | MAF      | -      |
| hsa-miR-656 | MAGEB16  | MAGEB16  | -      |
| hsa-miR-656 | -        | MAGEB3   | MAGEB3 |
| hsa-miR-656 | MAGEB4   | MAGEB4   | -      |
| hsa-miR-656 | MAGEE1   | MAGEE1   | -      |
| hsa-miR-656 | MAGI2    | MAGI2    | -      |
| hsa-miR-656 | MAL2     | MAL2     | -      |
| hsa-miR-656 | MALT1    | MALT1    | -      |
| hsa-miR-656 | MAMDC2   | MAMDC2   | -      |
| hsa-miR-656 | MANEA    | MANEA    | -      |
| hsa-miR-656 | MAP1LC3C | MAP1LC3C | -      |
| hsa-miR-656 | MAP3K13  | MAP3K13  | -      |
| hsa-miR-656 | MAP3K2   | MAP3K2   | -      |

|             |           |           |       |
|-------------|-----------|-----------|-------|
| hsa-miR-656 | MAP4K4    | MAP4K4    | -     |
| hsa-miR-656 | MAP6      | MAP6      | -     |
| hsa-miR-656 | MAP7      | MAP7      | -     |
| hsa-miR-656 | MAP9      | MAP9      | -     |
| hsa-miR-656 | MAPK10    | MAPK10    | -     |
| hsa-miR-656 | MAPK1IP1L | MAPK1IP1L | -     |
| hsa-miR-656 | MAPK8IP1  | MAPK8IP1  | -     |
| hsa-miR-656 | MAPK9     | MAPK9     | -     |
| hsa-miR-656 | MARCH5    | MARCH5    | -     |
| hsa-miR-656 | MARCKS    | MARCKS    | -     |
| hsa-miR-656 | MARK1     | MARK1     | -     |
| hsa-miR-656 | MAST2     | -         | MAST2 |
| hsa-miR-656 | MAT2B     | MAT2B     | -     |
| hsa-miR-656 | MATN3     | MATN3     | -     |
| hsa-miR-656 | MBD1      | MBD1      | -     |
| hsa-miR-656 | MBD2      | MBD2      | -     |
| hsa-miR-656 | MBL2      | MBL2      | -     |
| hsa-miR-656 | MBLAC2    | MBLAC2    | -     |
| hsa-miR-656 | MBNL1     | MBNL1     | -     |
| hsa-miR-656 | MBNL2     | MBNL2     | -     |
| hsa-miR-656 | MBOAT2    | MBOAT2    | -     |
| hsa-miR-656 | MBTPS2    | MBTPS2    | -     |
| hsa-miR-656 | MCART6    | MCART6    | -     |
| hsa-miR-656 | MCC       | MCC       | -     |
| hsa-miR-656 | MCM10     | MCM10     | -     |
| hsa-miR-656 | MCTP1     | MCTP1     | -     |
| hsa-miR-656 | MCTP2     | MCTP2     | -     |
| hsa-miR-656 | MDFIC     | MDFIC     | -     |
| hsa-miR-656 | MDGA2     | MDGA2     | -     |
| hsa-miR-656 | MDK       | MDK       | -     |
| hsa-miR-656 | MDM2      | MDM2      | -     |
| hsa-miR-656 | MED13L    | MED13L    | -     |
| hsa-miR-656 | MED14     | MED14     | -     |
| hsa-miR-656 | MED17     | MED17     | -     |
| hsa-miR-656 | MED21     | MED21     | -     |
| hsa-miR-656 | MED4      | MED4      | -     |
| hsa-miR-656 | MEF2A     | MEF2A     | -     |
| hsa-miR-656 | MEF2C     | MEF2C     | -     |
| hsa-miR-656 | MEGF11    | MEGF11    | -     |
| hsa-miR-656 | MERTK     | MERTK     | -     |
| hsa-miR-656 | MFSD8     | MFSD8     | -     |
| hsa-miR-656 | MGAM      | MGAM      | -     |
| hsa-miR-656 | MGAT3     | MGAT3     | -     |
| hsa-miR-656 | MIB1      | MIB1      | -     |
| hsa-miR-656 | MICALCL   | MICALCL   | -     |
| hsa-miR-656 | MICB      | MICB      | -     |
| hsa-miR-656 | MID2      | MID2      | -     |
| hsa-miR-656 | MINA      | MINA      | -     |
| hsa-miR-656 | -         | MITD1     | MITD1 |
| hsa-miR-656 | MKI67IP   | MKI67IP   | -     |
| hsa-miR-656 | MKRN3     | MKRN3     | -     |

|             |          |          |         |
|-------------|----------|----------|---------|
| hsa-miR-656 | MKX      | MKX      | -       |
| hsa-miR-656 | MLANA    | MLANA    | -       |
| hsa-miR-656 | MLF1     | MLF1     | -       |
| hsa-miR-656 | MLLT10   | MLLT10   | -       |
| hsa-miR-656 | MLLT4    | MLLT4    | -       |
| hsa-miR-656 | MLLT6    | MLLT6    | -       |
| hsa-miR-656 | MMAA     | MMAA     | -       |
| hsa-miR-656 | MMACHC   | MMACHC   | -       |
| hsa-miR-656 | MMD      | MMD      | -       |
| hsa-miR-656 | MME      | MME      | -       |
| hsa-miR-656 | MMP16    | MMP16    | -       |
| hsa-miR-656 | MMP2     | MMP2     | -       |
| hsa-miR-656 | MMP20    | MMP20    | -       |
| hsa-miR-656 | MMP27    | MMP27    | -       |
| hsa-miR-656 | MMP8     | MMP8     | -       |
| hsa-miR-656 | MOBKL1A  | MOBKL1A  | -       |
| hsa-miR-656 | MOBKL3   | MOBKL3   | -       |
| hsa-miR-656 | MON2     | MON2     | -       |
| hsa-miR-656 | MORC1    | MORC1    | -       |
| hsa-miR-656 | MOSPD1   | MOSPD1   | -       |
| hsa-miR-656 | MPHOSPH6 | MPHOSPH6 | -       |
| hsa-miR-656 | MPP6     | MPP6     | -       |
| hsa-miR-656 | MPP7     | MPP7     | -       |
| hsa-miR-656 | MRO      | MRO      | -       |
| hsa-miR-656 | MRP63    | MRP63    | -       |
| hsa-miR-656 | MRPL42   | MRPL42   | -       |
| hsa-miR-656 | MRPS16   | MRPS16   | -       |
| hsa-miR-656 | MRPS30   | MRPS30   | -       |
| hsa-miR-656 | MS4A2    | MS4A2    | -       |
| hsa-miR-656 | -        | MSH2     | MSH2    |
| hsa-miR-656 | MSH4     | MSH4     | -       |
| hsa-miR-656 | MSI2     | MSI2     | -       |
| hsa-miR-656 | MSN      | MSN      | -       |
| hsa-miR-656 | MSR1     | MSR1     | -       |
| hsa-miR-656 | MSRB3    | MSRB3    | -       |
| hsa-miR-656 | MSTN     | MSTN     | -       |
| hsa-miR-656 | MTCH2    | MTCH2    | -       |
| hsa-miR-656 | MTCP1NB  | MTCP1NB  | -       |
| hsa-miR-656 | MTDH     | MTDH     | -       |
| hsa-miR-656 | MTF2     | MTF2     | -       |
| hsa-miR-656 | MTFR1    | MTFR1    | -       |
| hsa-miR-656 | -        | MTHFD2L  | MTHFD2L |
| hsa-miR-656 | MTMR10   | MTMR10   | -       |
| hsa-miR-656 | MTMR12   | MTMR12   | -       |
| hsa-miR-656 | MTMR9    | MTMR9    | -       |
| hsa-miR-656 | MTPN     | MTPN     | -       |
| hsa-miR-656 | MTRR     | MTRR     | -       |
| hsa-miR-656 | MTUS1    | MTUS1    | -       |
| hsa-miR-656 | -        | MTX2     | MTX2    |
| hsa-miR-656 | MUC15    | MUC15    | -       |
| hsa-miR-656 | MUC17    | MUC17    | -       |

|             |         |         |      |
|-------------|---------|---------|------|
| hsa-miR-656 | MUC7    | MUC7    | -    |
| hsa-miR-656 | MUM1L1  | MUM1L1  | -    |
| hsa-miR-656 | MURC    | MURC    | -    |
| hsa-miR-656 | MXD4    | MXD4    | -    |
| hsa-miR-656 | MXRA5   | MXRA5   | -    |
| hsa-miR-656 | MYBL1   | MYBL1   | -    |
| hsa-miR-656 | MYD88   | MYD88   | -    |
| hsa-miR-656 | MYEF2   | MYEF2   | -    |
| hsa-miR-656 | -       | MYF6    | MYF6 |
| hsa-miR-656 | MYNN    | MYNN    | -    |
| hsa-miR-656 | MYO3B   | MYO3B   | -    |
| hsa-miR-656 | MYO5C   | MYO5C   | -    |
| hsa-miR-656 | MYOZ2   | MYOZ2   | -    |
| hsa-miR-656 | MYRIP   | MYRIP   | -    |
| hsa-miR-656 | MYT1    | MYT1    | -    |
| hsa-miR-656 | N4BP2   | N4BP2   | -    |
| hsa-miR-656 | N4BP2L2 | N4BP2L2 | -    |
| hsa-miR-656 | NAA15   | NAA15   | -    |
| hsa-miR-656 | NAA16   | NAA16   | -    |
| hsa-miR-656 | NAA25   | NAA25   | -    |
| hsa-miR-656 | NAA38   | NAA38   | -    |
| hsa-miR-656 | NAAA    | NAAA    | -    |
| hsa-miR-656 | NAB1    | NAB1    | -    |
| hsa-miR-656 | NAIF1   | NAIF1   | -    |
| hsa-miR-656 | NAIP    | NAIP    | -    |
| hsa-miR-656 | NALCN   | NALCN   | -    |
| hsa-miR-656 | NANP    | NANP    | -    |
| hsa-miR-656 | NAPB    | NAPB    | -    |
| hsa-miR-656 | NAPG    | NAPG    | -    |
| hsa-miR-656 | NAT1    | NAT1    | -    |
| hsa-miR-656 | NAV3    | NAV3    | -    |
| hsa-miR-656 | NBEAL1  | NBEAL1  | -    |
| hsa-miR-656 | NBPF11  | NBPF11  | -    |
| hsa-miR-656 | NBPF15  | NBPF15  | -    |
| hsa-miR-656 | NBPF16  | NBPF16  | -    |
| hsa-miR-656 | NCALD   | NCALD   | -    |
| hsa-miR-656 | NCAM2   | NCAM2   | -    |
| hsa-miR-656 | NCAPG   | NCAPG   | -    |
| hsa-miR-656 | NCKAP5  | NCKAP5  | -    |
| hsa-miR-656 | NCOA2   | NCOA2   | -    |
| hsa-miR-656 | NDFIP2  | NDFIP2  | -    |
| hsa-miR-656 | NDRG3   | NDRG3   | -    |
| hsa-miR-656 | NDST3   | NDST3   | -    |
| hsa-miR-656 | NDUFB4  | NDUFB4  | -    |
| hsa-miR-656 | NECAB1  | NECAB1  | -    |
| hsa-miR-656 | NECAP1  | NECAP1  | -    |
| hsa-miR-656 | NEDD4   | NEDD4   | -    |
| hsa-miR-656 | NEDD4L  | NEDD4L  | -    |
| hsa-miR-656 | NEDD9   | NEDD9   | -    |
| hsa-miR-656 | NEGR1   | NEGR1   | -    |
| hsa-miR-656 | NEK4    | NEK4    | -    |

|             |           |           |       |
|-------------|-----------|-----------|-------|
| hsa-miR-656 | NEK7      | NEK7      | -     |
| hsa-miR-656 | NEUROD4   | NEUROD4   | -     |
| hsa-miR-656 | NEXN      | NEXN      | -     |
| hsa-miR-656 | NF1       | NF1       | -     |
| hsa-miR-656 | NFAT5     | NFAT5     | -     |
| hsa-miR-656 | NFATC1    | NFATC1    | -     |
| hsa-miR-656 | NFATC3    | NFATC3    | -     |
| hsa-miR-656 | NFIB      | NFIB      | -     |
| hsa-miR-656 | NFKBIB    | NFKBIB    | -     |
| hsa-miR-656 | NHEDC1    | NHEDC1    | -     |
| hsa-miR-656 | NHLRC2    | NHLRC2    | -     |
| hsa-miR-656 | NHS       | NHS       | -     |
| hsa-miR-656 | NID1      | NID1      | -     |
| hsa-miR-656 | NIF3L1    | NIF3L1    | -     |
| hsa-miR-656 | NIN       | NIN       | -     |
| hsa-miR-656 | NINL      | NINL      | -     |
| hsa-miR-656 | NIPA1     | NIPA1     | -     |
| hsa-miR-656 | NIPSNAP3A | NIPSNAP3A | -     |
| hsa-miR-656 | NIPSNAP3B | NIPSNAP3B | -     |
| hsa-miR-656 | NIT2      | NIT2      | -     |
| hsa-miR-656 | NKAIN2    | NKAIN2    | -     |
| hsa-miR-656 | NKAIN3    | NKAIN3    | -     |
| hsa-miR-656 | NKIRAS1   | NKIRAS1   | -     |
| hsa-miR-656 | NLGN4Y    | NLGN4Y    | -     |
| hsa-miR-656 | NLK       | NLK       | -     |
| hsa-miR-656 | NLN       | NLN       | -     |
| hsa-miR-656 | NOB1      | NOB1      | -     |
| hsa-miR-656 | NOC3L     | NOC3L     | -     |
| hsa-miR-656 | NOG       | NOG       | -     |
| hsa-miR-656 | NOL3      | NOL3      | -     |
| hsa-miR-656 | NOTCH2    | NOTCH2    | -     |
| hsa-miR-656 | NOTCH2NL  | NOTCH2NL  | -     |
| hsa-miR-656 | NOVA1     | NOVA1     | -     |
| hsa-miR-656 | NPIP      | NPIP      | -     |
| hsa-miR-656 | NPIPL3    | NPIPL3    | -     |
| hsa-miR-656 | NPL       | NPL       | -     |
| hsa-miR-656 | NPR3      | NPR3      | -     |
| hsa-miR-656 | NPTN      | NPTN      | -     |
| hsa-miR-656 | NPTX1     | NPTX1     | -     |
| hsa-miR-656 | NPY1R     | NPY1R     | -     |
| hsa-miR-656 | NPY2R     | NPY2R     | -     |
| hsa-miR-656 | -         | NR0B1     | NR0B1 |
| hsa-miR-656 | NR1D2     | NR1D2     | -     |
| hsa-miR-656 | NR2C2     | NR2C2     | -     |
| hsa-miR-656 | NR2C2AP   | NR2C2AP   | -     |
| hsa-miR-656 | NR3C1     | NR3C1     | -     |
| hsa-miR-656 | NR4A1     | NR4A1     | -     |
| hsa-miR-656 | NR4A2     | NR4A2     | -     |
| hsa-miR-656 | NR4A3     | NR4A3     | -     |
| hsa-miR-656 | NRAS      | NRAS      | -     |
| hsa-miR-656 | NRBF2     | NRBF2     | -     |



|             |         |         |         |
|-------------|---------|---------|---------|
| hsa-miR-656 | NRIP1   | NRIP1   | -       |
| hsa-miR-656 | NRK     | NRK     | -       |
| hsa-miR-656 | NRP2    | NRP2    | -       |
| hsa-miR-656 | NRXN1   | NRXN1   | -       |
| hsa-miR-656 | NRXN3   | NRXN3   | -       |
| hsa-miR-656 | NSF     | NSF     | -       |
| hsa-miR-656 | NSL1    | -       | NSL1    |
| hsa-miR-656 | -       | NSMCE2  | NSMCE2  |
| hsa-miR-656 | NTN1    | NTN1    | -       |
| hsa-miR-656 | NTRK2   | NTRK2   | -       |
| hsa-miR-656 | NUAK1   | NUAK1   | -       |
| hsa-miR-656 | NUDCD1  | NUDCD1  | -       |
| hsa-miR-656 | NUDT12  | NUDT12  | -       |
| hsa-miR-656 | NUDT7   | NUDT7   | -       |
| hsa-miR-656 | NUFIP1  | NUFIP1  | -       |
| hsa-miR-656 | NUFIP2  | NUFIP2  | -       |
| hsa-miR-656 | NUP133  | NUP133  | -       |
| hsa-miR-656 | NUP62CL | NUP62CL | -       |
| hsa-miR-656 | NUS1    | NUS1    | -       |
| hsa-miR-656 | NXF1    | NXF1    | -       |
| hsa-miR-656 | NXNL2   | NXNL2   | -       |
| hsa-miR-656 | OCIAD1  | OCIAD1  | -       |
| hsa-miR-656 | ODZ1    | ODZ1    | -       |
| hsa-miR-656 | ODZ2    | ODZ2    | -       |
| hsa-miR-656 | OGT     | OGT     | -       |
| hsa-miR-656 | OLA1    | OLA1    | -       |
| hsa-miR-656 | OLFM3   | OLFM3   | -       |
| hsa-miR-656 | OLIG2   | OLIG2   | -       |
| hsa-miR-656 | OMD     | OMD     | -       |
| hsa-miR-656 | OPA1    | OPA1    | -       |
| hsa-miR-656 | OPHN1   | OPHN1   | -       |
| hsa-miR-656 | OR2C3   | OR2C3   | -       |
| hsa-miR-656 | OR2L13  | OR2L13  | -       |
| hsa-miR-656 | OR9Q1   | OR9Q1   | -       |
| hsa-miR-656 | OSBPL11 | OSBPL11 | -       |
| hsa-miR-656 | OSBPL3  | OSBPL3  | -       |
| hsa-miR-656 | OSBPL8  | OSBPL8  | -       |
| hsa-miR-656 | -       | OSGEPL1 | OSGEPL1 |
| hsa-miR-656 | OSGIN2  | OSGIN2  | -       |
| hsa-miR-656 | OSMR    | OSMR    | -       |
| hsa-miR-656 | OSTC    | OSTC    | -       |
| hsa-miR-656 | OSTM1   | OSTM1   | -       |
| hsa-miR-656 | -       | OTC     | OTC     |
| hsa-miR-656 | OTOR    | OTOR    | -       |
| hsa-miR-656 | OTP     | OTP     | -       |
| hsa-miR-656 | OTUD4   | OTUD4   | -       |
| hsa-miR-656 | OTUD7B  | OTUD7B  | -       |
| hsa-miR-656 | OVOL1   | OVOL1   | -       |
| hsa-miR-656 | OXCT1   | OXCT1   | -       |
| hsa-miR-656 | OXR1    | OXR1    | -       |
| hsa-miR-656 | OXSR1   | OXSR1   | -       |

|             |             |             |   |
|-------------|-------------|-------------|---|
| hsa-miR-656 | P2RY13      | P2RY13      | - |
| hsa-miR-656 | PABPC4L     | PABPC4L     | - |
| hsa-miR-656 | PABPC5      | PABPC5      | - |
| hsa-miR-656 | PAFAH1B1    | PAFAH1B1    | - |
| hsa-miR-656 | PAFAH1B2    | PAFAH1B2    | - |
| hsa-miR-656 | PAFAH2      | PAFAH2      | - |
| hsa-miR-656 | PAGE2       | PAGE2       | - |
| hsa-miR-656 | PAH         | PAH         | - |
| hsa-miR-656 | PAIP1       | PAIP1       | - |
| hsa-miR-656 | PAK2        | PAK2        | - |
| hsa-miR-656 | PAK6        | PAK6        | - |
| hsa-miR-656 | PAK7        | PAK7        | - |
| hsa-miR-656 | PALLD       | PALLD       | - |
| hsa-miR-656 | PALM2       | PALM2       | - |
| hsa-miR-656 | PALM2-AKAP2 | PALM2-AKAP2 | - |
| hsa-miR-656 | PANK1       | PANK1       | - |
| hsa-miR-656 | PANX1       | PANX1       | - |
| hsa-miR-656 | PAPD5       | PAPD5       | - |
| hsa-miR-656 | PAPOLB      | PAPOLB      | - |
| hsa-miR-656 | PAPPA       | PAPPA       | - |
| hsa-miR-656 | PAQR3       | PAQR3       | - |
| hsa-miR-656 | PAQR9       | PAQR9       | - |
| hsa-miR-656 | PARD6B      | PARD6B      | - |
| hsa-miR-656 | PATE1       | PATE1       | - |
| hsa-miR-656 | PAX4        | PAX4        | - |
| hsa-miR-656 | PAX5        | PAX5        | - |
| hsa-miR-656 | PBLD        | PBLD        | - |
| hsa-miR-656 | PBOV1       | PBOV1       | - |
| hsa-miR-656 | PBRM1       | PBRM1       | - |
| hsa-miR-656 | PCBD2       | PCBD2       | - |
| hsa-miR-656 | PCDH11X     | PCDH11X     | - |
| hsa-miR-656 | PCDH11Y     | PCDH11Y     | - |
| hsa-miR-656 | PCDH15      | PCDH15      | - |
| hsa-miR-656 | PCDH17      | PCDH17      | - |
| hsa-miR-656 | PCDH7       | PCDH7       | - |
| hsa-miR-656 | PCDH9       | PCDH9       | - |
| hsa-miR-656 | PCDHA9      | PCDHA9      | - |
| hsa-miR-656 | PCDHAC1     | PCDHAC1     | - |
| hsa-miR-656 | PCDHB3      | PCDHB3      | - |
| hsa-miR-656 | PCDHB7      | PCDHB7      | - |
| hsa-miR-656 | PCDHB9      | PCDHB9      | - |
| hsa-miR-656 | PCDHGA4     | PCDHGA4     | - |
| hsa-miR-656 | PCDHGA7     | PCDHGA7     | - |
| hsa-miR-656 | PCGF3       | PCGF3       | - |
| hsa-miR-656 | PCGF5       | PCGF5       | - |
| hsa-miR-656 | PCLO        | PCLO        | - |
| hsa-miR-656 | PCMTD2      | PCMTD2      | - |
| hsa-miR-656 | PCSK1       | PCSK1       | - |
| hsa-miR-656 | PCSK2       | PCSK2       | - |
| hsa-miR-656 | PCTP        | PCTP        | - |
| hsa-miR-656 | PDCD2       | PDCD2       | - |

|             |         |         |       |
|-------------|---------|---------|-------|
| hsa-miR-656 | PDCD2L  | PDCD2L  | -     |
| hsa-miR-656 | PDCL    | PDCL    | -     |
| hsa-miR-656 | PDE12   | PDE12   | -     |
| hsa-miR-656 | PDE3B   | PDE3B   | -     |
| hsa-miR-656 | PDE4D   | PDE4D   | -     |
| hsa-miR-656 | PDE7B   | PDE7B   | -     |
| hsa-miR-656 | PDGFB   | PDGFB   | -     |
| hsa-miR-656 | PDGFD   | PDGFD   | -     |
| hsa-miR-656 | PDHB    | PDHB    | -     |
| hsa-miR-656 | PDIK1L  | PDIK1L  | -     |
| hsa-miR-656 | PDK1    | PDK1    | -     |
| hsa-miR-656 | PDPK1   | PDPK1   | -     |
| hsa-miR-656 | PDS5A   | PDS5A   | -     |
| hsa-miR-656 | PDS5B   | PDS5B   | -     |
| hsa-miR-656 | PDX1    | PDX1    | -     |
| hsa-miR-656 | PDXDC1  | PDXDC1  | -     |
| hsa-miR-656 | PDZD2   | PDZD2   | -     |
| hsa-miR-656 | PEG10   | PEG10   | -     |
| hsa-miR-656 | PEG3    | PEG3    | -     |
| hsa-miR-656 | PELI2   | PELI2   | -     |
| hsa-miR-656 | -       | PER3    | PER3  |
| hsa-miR-656 | PERP    | PERP    | -     |
| hsa-miR-656 | PEX19   | PEX19   | -     |
| hsa-miR-656 | PEX2    | PEX2    | -     |
| hsa-miR-656 | PEX3    | PEX3    | -     |
| hsa-miR-656 | PEX5L   | PEX5L   | -     |
| hsa-miR-656 | -       | PFDN2   | PFDN2 |
| hsa-miR-656 | PFKFB2  | PFKFB2  | -     |
| hsa-miR-656 | PGAP1   | PGAP1   | -     |
| hsa-miR-656 | PGM2L1  | PGM2L1  | -     |
| hsa-miR-656 | PGM3    | -       | PGM3  |
| hsa-miR-656 | PGR     | -       | PGR   |
| hsa-miR-656 | PGRMC2  | PGRMC2  | -     |
| hsa-miR-656 | PHACTR2 | PHACTR2 | -     |
| hsa-miR-656 | PHC3    | PHC3    | -     |
| hsa-miR-656 | PHF12   | PHF12   | -     |
| hsa-miR-656 | PHF14   | PHF14   | -     |
| hsa-miR-656 | PHF15   | PHF15   | -     |
| hsa-miR-656 | PHF20   | PHF20   | -     |
| hsa-miR-656 | PHF20L1 | PHF20L1 | -     |
| hsa-miR-656 | PHF21A  | PHF21A  | -     |
| hsa-miR-656 | PHF23   | PHF23   | -     |
| hsa-miR-656 | PHF5A   | PHF5A   | -     |
| hsa-miR-656 | PHF6    | PHF6    | -     |
| hsa-miR-656 | PHF8    | PHF8    | -     |
| hsa-miR-656 | PHIP    | PHIP    | -     |
| hsa-miR-656 | PHKB    | PHKB    | -     |
| hsa-miR-656 | PHLDA1  | PHLDA1  | -     |
| hsa-miR-656 | PHLPP1  | PHLPP1  | -     |
| hsa-miR-656 | PHLPP2  | PHLPP2  | -     |
| hsa-miR-656 | PHYHIPL | PHYHIPL | -     |

|             |          |          |        |
|-------------|----------|----------|--------|
| hsa-miR-656 | PI15     | PI15     | -      |
| hsa-miR-656 | PICALM   | PICALM   | -      |
| hsa-miR-656 | PIGG     | PIGG     | -      |
| hsa-miR-656 | PIGO     | PIGO     | -      |
| hsa-miR-656 | PIGX     | PIGX     | -      |
| hsa-miR-656 | PIK3C2A  | PIK3C2A  | -      |
| hsa-miR-656 | PIK3C2G  | PIK3C2G  | -      |
| hsa-miR-656 | PIK3R1   | PIK3R1   | -      |
| hsa-miR-656 | PIKFYVE  | PIKFYVE  | -      |
| hsa-miR-656 | PIP5K1A  | PIP5K1A  | -      |
| hsa-miR-656 | PIP5K1C  | PIP5K1C  | -      |
| hsa-miR-656 | PIRT     | PIRT     | -      |
| hsa-miR-656 | PJA2     | PJA2     | -      |
| hsa-miR-656 | PKHD1    | PKHD1    | -      |
| hsa-miR-656 | PKIA     | PKIA     | -      |
| hsa-miR-656 | PKNOX1   | PKNOX1   | -      |
| hsa-miR-656 | PKP2     | PKP2     | -      |
| hsa-miR-656 | PLA2G12A | PLA2G12A | -      |
| hsa-miR-656 | PLA2R1   | PLA2R1   | -      |
| hsa-miR-656 | PLAC1L   | PLAC1L   | -      |
| hsa-miR-656 | PLAC8    | PLAC8    | -      |
| hsa-miR-656 | PLAG1    | PLAG1    | -      |
| hsa-miR-656 | PLAGL2   | PLAGL2   | -      |
| hsa-miR-656 | PLCB1    | PLCB1    | -      |
| hsa-miR-656 | PLCL1    | PLCL1    | -      |
| hsa-miR-656 | PLCXD1   | PLCXD1   | -      |
| hsa-miR-656 | PLCXD3   | PLCXD3   | -      |
| hsa-miR-656 | PLD5     | PLD5     | -      |
| hsa-miR-656 | PLD6     | PLD6     | -      |
| hsa-miR-656 | PLDN     | PLDN     | -      |
| hsa-miR-656 | PLEC     | PLEC     | -      |
| hsa-miR-656 | PLEKHA8  | PLEKHA8  | -      |
| hsa-miR-656 | PLEKHB2  | PLEKHB2  | -      |
| hsa-miR-656 | PLEKHF2  | PLEKHF2  | -      |
| hsa-miR-656 | PLEKHG1  | PLEKHG1  | -      |
| hsa-miR-656 | PLEKHG7  | PLEKHG7  | -      |
| hsa-miR-656 | PLEKHH1  | PLEKHH1  | -      |
| hsa-miR-656 | PLEKHH2  | PLEKHH2  | -      |
| hsa-miR-656 | PLEKHM3  | PLEKHM3  | -      |
| hsa-miR-656 | PLIN1    | PLIN1    | -      |
| hsa-miR-656 | -        | PLK4     | PLK4   |
| hsa-miR-656 | PLOD2    | PLOD2    | -      |
| hsa-miR-656 | PLSCR1   | PLSCR1   | -      |
| hsa-miR-656 | PLSCR4   | PLSCR4   | -      |
| hsa-miR-656 | -        | PMCHL1   | PMCHL1 |
| hsa-miR-656 | PMEPA1   | PMEPA1   | -      |
| hsa-miR-656 | PMP2     | PMP2     | -      |
| hsa-miR-656 | PMP22    | PMP22    | -      |
| hsa-miR-656 | PMPCB    | PMPCB    | -      |
| hsa-miR-656 | PNPLA8   | PNPLA8   | -      |
| hsa-miR-656 | PNRC2    | PNRC2    | -      |

|             |          |          |       |
|-------------|----------|----------|-------|
| hsa-miR-656 | PODN     | PODN     | -     |
| hsa-miR-656 | POF1B    | POF1B    | -     |
| hsa-miR-656 | POGZ     | POGZ     | -     |
| hsa-miR-656 | POLK     | POLK     | -     |
| hsa-miR-656 | POLR1D   | POLR1D   | -     |
| hsa-miR-656 | POMP     | POMP     | -     |
| hsa-miR-656 | POPDC3   | POPDC3   | -     |
| hsa-miR-656 | PPAP2B   | PPAP2B   | -     |
| hsa-miR-656 | PPARD    | PPARD    | -     |
| hsa-miR-656 | PPFIBP1  | PPFIBP1  | -     |
| hsa-miR-656 | PPHLN1   | PPHLN1   | -     |
| hsa-miR-656 | PPIB     | PPIB     | -     |
| hsa-miR-656 | -        | PPIL3    | PPIL3 |
| hsa-miR-656 | PPM1A    | PPM1A    | -     |
| hsa-miR-656 | PPM1B    | PPM1B    | -     |
| hsa-miR-656 | PPM1E    | PPM1E    | -     |
| hsa-miR-656 | PPM1K    | PPM1K    | -     |
| hsa-miR-656 | PPP1CB   | PPP1CB   | -     |
| hsa-miR-656 | PPP1R15B | PPP1R15B | -     |
| hsa-miR-656 | PPP1R2   | PPP1R2   | -     |
| hsa-miR-656 | PPP1R9B  | PPP1R9B  | -     |
| hsa-miR-656 | PPP2R3A  | PPP2R3A  | -     |
| hsa-miR-656 | PPP2R5A  | PPP2R5A  | -     |
| hsa-miR-656 | PPP3CB   | PPP3CB   | -     |
| hsa-miR-656 | PPP3R1   | PPP3R1   | -     |
| hsa-miR-656 | PPP4R4   | PPP4R4   | -     |
| hsa-miR-656 | PPP6C    | PPP6C    | -     |
| hsa-miR-656 | PRDM12   | PRDM12   | -     |
| hsa-miR-656 | PRH2     | PRH2     | -     |
| hsa-miR-656 | PRKAA1   | PRKAA1   | -     |
| hsa-miR-656 | PRKAA2   | PRKAA2   | -     |
| hsa-miR-656 | PRKAR2B  | PRKAR2B  | -     |
| hsa-miR-656 | PRKCB    | PRKCB    | -     |
| hsa-miR-656 | PRKCH    | PRKCH    | -     |
| hsa-miR-656 | PRKDC    | PRKDC    | -     |
| hsa-miR-656 | PRKG2    | PRKG2    | -     |
| hsa-miR-656 | PRKX     | PRKX     | -     |
| hsa-miR-656 | PRPF40A  | PRPF40A  | -     |
| hsa-miR-656 | PRPF4B   | PRPF4B   | -     |
| hsa-miR-656 | PRR23C   | PRR23C   | -     |
| hsa-miR-656 | PRRC1    | PRRC1    | -     |
| hsa-miR-656 | PRRG1    | PRRG1    | -     |
| hsa-miR-656 | PRRX1    | PRRX1    | -     |
| hsa-miR-656 | PRTFDC1  | PRTFDC1  | -     |
| hsa-miR-656 | PRUNE2   | PRUNE2   | -     |
| hsa-miR-656 | PSD2     | PSD2     | -     |
| hsa-miR-656 | PSD3     | PSD3     | -     |
| hsa-miR-656 | PSG1     | PSG1     | -     |
| hsa-miR-656 | PSMA1    | PSMA1    | -     |
| hsa-miR-656 | PSMA8    | PSMA8    | -     |
| hsa-miR-656 | PSMB2    | PSMB2    | -     |

|             |           |           |       |
|-------------|-----------|-----------|-------|
| hsa-miR-656 | PSMC2     | PSMC2     | -     |
| hsa-miR-656 | PSME3     | PSME3     | -     |
| hsa-miR-656 | PTAR1     | PTAR1     | -     |
| hsa-miR-656 | PTBP2     | PTBP2     | -     |
| hsa-miR-656 | PTCD1     | PTCD1     | -     |
| hsa-miR-656 | PTCH1     | PTCH1     | -     |
| hsa-miR-656 | PTER      | PTER      | -     |
| hsa-miR-656 | -         | PTF1A     | PTF1A |
| hsa-miR-656 | PTGDR     | PTGDR     | -     |
| hsa-miR-656 | PTGER2    | PTGER2    | -     |
| hsa-miR-656 | PTGER3    | PTGER3    | -     |
| hsa-miR-656 | PTGER4    | PTGER4    | -     |
| hsa-miR-656 | PTGS2     | PTGS2     | -     |
| hsa-miR-656 | PTP4A1    | PTP4A1    | -     |
| hsa-miR-656 | PTPLAD1   | PTPLAD1   | -     |
| hsa-miR-656 | PTPMT1    | PTPMT1    | -     |
| hsa-miR-656 | PTPN1     | PTPN1     | -     |
| hsa-miR-656 | PTPN11    | PTPN11    | -     |
| hsa-miR-656 | PTPN12    | PTPN12    | -     |
| hsa-miR-656 | PTPN13    | PTPN13    | -     |
| hsa-miR-656 | PTPN14    | PTPN14    | -     |
| hsa-miR-656 | PTPN22    | PTPN22    | -     |
| hsa-miR-656 | PTPN9     | PTPN9     | -     |
| hsa-miR-656 | PTPRA     | PTPRA     | -     |
| hsa-miR-656 | PTPRB     | PTPRB     | -     |
| hsa-miR-656 | PTPRC     | PTPRC     | -     |
| hsa-miR-656 | PTPRD     | PTPRD     | -     |
| hsa-miR-656 | PTPRE     | PTPRE     | -     |
| hsa-miR-656 | PTPRM     | PTPRM     | -     |
| hsa-miR-656 | PURA      | PURA      | -     |
| hsa-miR-656 | PURG      | PURG      | -     |
| hsa-miR-656 | PUS10     | PUS10     | -     |
| hsa-miR-656 | PWWP2A    | PWWP2A    | -     |
| hsa-miR-656 | PYHIN1    | PYHIN1    | -     |
| hsa-miR-656 | PYROXD1   | PYROXD1   | -     |
| hsa-miR-656 | QDPR      | QDPR      | -     |
| hsa-miR-656 | QKI       | QKI       | -     |
| hsa-miR-656 | QRSL1     | QRSL1     | -     |
| hsa-miR-656 | QSER1     | QSER1     | -     |
| hsa-miR-656 | RAB11A    | RAB11A    | -     |
| hsa-miR-656 | RAB11FIP2 | RAB11FIP2 | -     |
| hsa-miR-656 | RAB11FIP3 | RAB11FIP3 | -     |
| hsa-miR-656 | RAB12     | RAB12     | -     |
| hsa-miR-656 | RAB1A     | RAB1A     | -     |
| hsa-miR-656 | RAB21     | RAB21     | -     |
| hsa-miR-656 | RAB28     | RAB28     | -     |
| hsa-miR-656 | RAB30     | RAB30     | -     |
| hsa-miR-656 | RAB31     | RAB31     | -     |
| hsa-miR-656 | RAB38     | RAB38     | -     |
| hsa-miR-656 | RAB39B    | RAB39B    | -     |
| hsa-miR-656 | RAB3GAP1  | RAB3GAP1  | -     |

|             |          |          |        |
|-------------|----------|----------|--------|
| hsa-miR-656 | RAB3GAP2 | RAB3GAP2 | -      |
| hsa-miR-656 | RAB3IP   | RAB3IP   | -      |
| hsa-miR-656 | RAB4A    | RAB4A    | -      |
| hsa-miR-656 | RAB5A    | RAB5A    | -      |
| hsa-miR-656 | RAB5C    | RAB5C    | -      |
| hsa-miR-656 | RAB6B    | RAB6B    | -      |
| hsa-miR-656 | RAB7A    | RAB7A    | -      |
| hsa-miR-656 | RABGAP1  | RABGAP1  | -      |
| hsa-miR-656 | RABGEF1  | RABGEF1  | -      |
| hsa-miR-656 | RACGAP1  | RACGAP1  | -      |
| hsa-miR-656 | RAD23B   | RAD23B   | -      |
| hsa-miR-656 | -        | RAD51C   | RAD51C |
| hsa-miR-656 | RAD52    | RAD52    | -      |
| hsa-miR-656 | RAG1     | RAG1     | -      |
| hsa-miR-656 | RAI1     | RAI1     | -      |
| hsa-miR-656 | RALB     | RALB     | -      |
| hsa-miR-656 | RANBP17  | RANBP17  | -      |
| hsa-miR-656 | RANBP2   | RANBP2   | -      |
| hsa-miR-656 | RAP2A    | RAP2A    | -      |
| hsa-miR-656 | RAP2C    | RAP2C    | -      |
| hsa-miR-656 | RAPGEF5  | RAPGEF5  | -      |
| hsa-miR-656 | RARRES1  | RARRES1  | -      |
| hsa-miR-656 | RASAL2   | RASAL2   | -      |
| hsa-miR-656 | RASD1    | RASD1    | -      |
| hsa-miR-656 | RASGEF1B | RASGEF1B | -      |
| hsa-miR-656 | RASGRP1  | RASGRP1  | -      |
| hsa-miR-656 | RASGRP3  | RASGRP3  | -      |
| hsa-miR-656 | RASSF8   | RASSF8   | -      |
| hsa-miR-656 | RB1CC1   | RB1CC1   | -      |
| hsa-miR-656 | RBAK     | RBAK     | -      |
| hsa-miR-656 | RBBP4    | RBBP4    | -      |
| hsa-miR-656 | RBBP6    | RBBP6    | -      |
| hsa-miR-656 | RBBP9    | RBBP9    | -      |
| hsa-miR-656 | RBM11    | RBM11    | -      |
| hsa-miR-656 | RBM12B   | RBM12B   | -      |
| hsa-miR-656 | RBM17    | RBM17    | -      |
| hsa-miR-656 | RBM19    | RBM19    | -      |
| hsa-miR-656 | RBM34    | RBM34    | -      |
| hsa-miR-656 | RBM38    | RBM38    | -      |
| hsa-miR-656 | RBM41    | RBM41    | -      |
| hsa-miR-656 | RBM43    | RBM43    | -      |
| hsa-miR-656 | RBM44    | RBM44    | -      |
| hsa-miR-656 | RBM47    | RBM47    | -      |
| hsa-miR-656 | RBM7     | RBM7     | -      |
| hsa-miR-656 | RBPM52   | RBPM52   | -      |
| hsa-miR-656 | RC3H2    | RC3H2    | -      |
| hsa-miR-656 | RCAN2    | RCAN2    | -      |
| hsa-miR-656 | RCBTB1   | RCBTB1   | -      |
| hsa-miR-656 | RCL1     | RCL1     | -      |
| hsa-miR-656 | RCN2     | RCN2     | -      |
| hsa-miR-656 | RCOR1    | RCOR1    | -      |

|             |         |         |   |
|-------------|---------|---------|---|
| hsa-miR-656 | RCOR3   | RCOR3   | - |
| hsa-miR-656 | RDH11   | RDH11   | - |
| hsa-miR-656 | RDX     | RDX     | - |
| hsa-miR-656 | REEP1   | REEP1   | - |
| hsa-miR-656 | REEP3   | REEP3   | - |
| hsa-miR-656 | REEP5   | REEP5   | - |
| hsa-miR-656 | RELL1   | RELL1   | - |
| hsa-miR-656 | RELN    | RELN    | - |
| hsa-miR-656 | REPS2   | REPS2   | - |
| hsa-miR-656 | REV3L   | REV3L   | - |
| hsa-miR-656 | RFC5    | RFC5    | - |
| hsa-miR-656 | RFFL    | RFFL    | - |
| hsa-miR-656 | RFT1    | RFT1    | - |
| hsa-miR-656 | RFX3    | RFX3    | - |
| hsa-miR-656 | RFX4    | RFX4    | - |
| hsa-miR-656 | RFX5    | RFX5    | - |
| hsa-miR-656 | RFX7    | RFX7    | - |
| hsa-miR-656 | RG9MTD2 | RG9MTD2 | - |
| hsa-miR-656 | RGMB    | RGMB    | - |
| hsa-miR-656 | RGNEF   | RGNEF   | - |
| hsa-miR-656 | RGR     | RGR     | - |
| hsa-miR-656 | RGS13   | RGS13   | - |
| hsa-miR-656 | RGS18   | RGS18   | - |
| hsa-miR-656 | RGS2    | RGS2    | - |
| hsa-miR-656 | RGS21   | RGS21   | - |
| hsa-miR-656 | RGS7BP  | RGS7BP  | - |
| hsa-miR-656 | RHOBTB1 | RHOBTB1 | - |
| hsa-miR-656 | RHPN2   | RHPN2   | - |
| hsa-miR-656 | RIC8B   | RIC8B   | - |
| hsa-miR-656 | RIF1    | RIF1    | - |
| hsa-miR-656 | RIMKLB  | RIMKLB  | - |
| hsa-miR-656 | RIMS1   | RIMS1   | - |
| hsa-miR-656 | RIMS2   | RIMS2   | - |
| hsa-miR-656 | RINL    | RINL    | - |
| hsa-miR-656 | RIOK2   | RIOK2   | - |
| hsa-miR-656 | RIOK3   | RIOK3   | - |
| hsa-miR-656 | RMND5A  | RMND5A  | - |
| hsa-miR-656 | RND3    | RND3    | - |
| hsa-miR-656 | RNF115  | RNF115  | - |
| hsa-miR-656 | RNF125  | RNF125  | - |
| hsa-miR-656 | RNF128  | RNF128  | - |
| hsa-miR-656 | RNF138  | RNF138  | - |
| hsa-miR-656 | RNF14   | RNF14   | - |
| hsa-miR-656 | RNF141  | RNF141  | - |
| hsa-miR-656 | RNF144A | RNF144A | - |
| hsa-miR-656 | RNF149  | RNF149  | - |
| hsa-miR-656 | RNF169  | RNF169  | - |
| hsa-miR-656 | RNF170  | RNF170  | - |
| hsa-miR-656 | RNF2    | RNF2    | - |
| hsa-miR-656 | RNF20   | RNF20   | - |
| hsa-miR-656 | RNF220  | RNF220  | - |



|             |          |          |       |
|-------------|----------|----------|-------|
| hsa-miR-656 | RNF38    | RNF38    | -     |
| hsa-miR-656 | RNF43    | RNF43    | -     |
| hsa-miR-656 | RNF44    | RNF44    | -     |
| hsa-miR-656 | RNFT1    | RNFT1    | -     |
| hsa-miR-656 | RNLS     | RNLS     | -     |
| hsa-miR-656 | -        | RNPC3    | RNPC3 |
| hsa-miR-656 | ROBO2    | ROBO2    | -     |
| hsa-miR-656 | ROCK1    | ROCK1    | -     |
| hsa-miR-656 | ROD1     | ROD1     | -     |
| hsa-miR-656 | RORA     | RORA     | -     |
| hsa-miR-656 | RORB     | RORB     | -     |
| hsa-miR-656 | RPE      | RPE      | -     |
| hsa-miR-656 | RPGRIP1L | RPGRIP1L | -     |
| hsa-miR-656 | RPH3A    | RPH3A    | -     |
| hsa-miR-656 | RPP14    | RPP14    | -     |
| hsa-miR-656 | RPRD1A   | RPRD1A   | -     |
| hsa-miR-656 | RPS20    | RPS20    | -     |
| hsa-miR-656 | RPS6KA3  | RPS6KA3  | -     |
| hsa-miR-656 | RPS6KA5  | RPS6KA5  | -     |
| hsa-miR-656 | RPS6KA6  | RPS6KA6  | -     |
| hsa-miR-656 | RRAS2    | RRAS2    | -     |
| hsa-miR-656 | RRM2B    | RRM2B    | -     |
| hsa-miR-656 | RRP15    | RRP15    | -     |
| hsa-miR-656 | RSBN1    | RSBN1    | -     |
| hsa-miR-656 | RSL24D1  | RSL24D1  | -     |
| hsa-miR-656 | RSRC1    | RSRC1    | -     |
| hsa-miR-656 | RSRC2    | RSRC2    | -     |
| hsa-miR-656 | RTF1     | RTF1     | -     |
| hsa-miR-656 | RTKN2    | RTKN2    | -     |
| hsa-miR-656 | RTP4     | RTP4     | -     |
| hsa-miR-656 | RUFY3    | RUFY3    | -     |
| hsa-miR-656 | RUNDC3B  | RUNDC3B  | -     |
| hsa-miR-656 | RUNX1T1  | RUNX1T1  | -     |
| hsa-miR-656 | RUNX3    | RUNX3    | -     |
| hsa-miR-656 | RYBP     | RYBP     | -     |
| hsa-miR-656 | RYR2     | RYR2     | -     |
| hsa-miR-656 | S100A7A  | S100A7A  | -     |
| hsa-miR-656 | S100Z    | S100Z    | -     |
| hsa-miR-656 | SAA2     | SAA2     | -     |
| hsa-miR-656 | SACM1L   | SACM1L   | -     |
| hsa-miR-656 | SAMD12   | SAMD12   | -     |
| hsa-miR-656 | SAMD5    | SAMD5    | -     |
| hsa-miR-656 | SAR1B    | SAR1B    | -     |
| hsa-miR-656 | SART3    | SART3    | -     |
| hsa-miR-656 | SASH1    | SASH1    | -     |
| hsa-miR-656 | SASS6    | SASS6    | -     |
| hsa-miR-656 | SAT1     | SAT1     | -     |
| hsa-miR-656 | SATB2    | SATB2    | -     |
| hsa-miR-656 | SBF2     | SBF2     | -     |
| hsa-miR-656 | SC5DL    | SC5DL    | -     |
| hsa-miR-656 | SCAMP1   | SCAMP1   | -     |

|             |           |           |      |
|-------------|-----------|-----------|------|
| hsa-miR-656 | SCAPER    | SCAPER    | -    |
| hsa-miR-656 | SCD       | SCD       | -    |
| hsa-miR-656 | -         | SCG2      | SCG2 |
| hsa-miR-656 | SCG3      | SCG3      | -    |
| hsa-miR-656 | SCN2A     | SCN2A     | -    |
| hsa-miR-656 | SCN3A     | SCN3A     | -    |
| hsa-miR-656 | SCN9A     | SCN9A     | -    |
| hsa-miR-656 | SCOC      | SCOC      | -    |
| hsa-miR-656 | SCRN1     | SCRN1     | -    |
| hsa-miR-656 | SDC1      | SDC1      | -    |
| hsa-miR-656 | SDC4      | SDC4      | -    |
| hsa-miR-656 | SDR16C5   | SDR16C5   | -    |
| hsa-miR-656 | SEC11C    | SEC11C    | -    |
| hsa-miR-656 | SEC22A    | SEC22A    | -    |
| hsa-miR-656 | SEC23A    | SEC23A    | -    |
| hsa-miR-656 | SEC23B    | SEC23B    | -    |
| hsa-miR-656 | SEC24A    | SEC24A    | -    |
| hsa-miR-656 | SEC24B    | SEC24B    | -    |
| hsa-miR-656 | SEC62     | SEC62     | -    |
| hsa-miR-656 | SEC63     | SEC63     | -    |
| hsa-miR-656 | SECISBP2L | SECISBP2L | -    |
| hsa-miR-656 | SEL1L     | SEL1L     | -    |
| hsa-miR-656 | SEL1L3    | SEL1L3    | -    |
| hsa-miR-656 | SELK      | SELK      | -    |
| hsa-miR-656 | SELT      | SELT      | -    |
| hsa-miR-656 | SEMA3C    | SEMA3C    | -    |
| hsa-miR-656 | SEMA3F    | SEMA3F    | -    |
| hsa-miR-656 | SEMA6D    | SEMA6D    | -    |
| hsa-miR-656 | SENP6     | SENP6     | -    |
| hsa-miR-656 | SENP7     | SENP7     | -    |
| hsa-miR-656 | SEPSECS   | SEPSECS   | -    |
| hsa-miR-656 | SEPT14    | SEPT14    | -    |
| hsa-miR-656 | SEPT7     | SEPT7     | -    |
| hsa-miR-656 | SEPT8     | SEPT8     | -    |
| hsa-miR-656 | SERBP1    | SERBP1    | -    |
| hsa-miR-656 | SERP1     | SERP1     | -    |
| hsa-miR-656 | SERPINA5  | SERPINA5  | -    |
| hsa-miR-656 | SERPINB13 | SERPINB13 | -    |
| hsa-miR-656 | SERPINB5  | SERPINB5  | -    |
| hsa-miR-656 | SERPINB8  | SERPINB8  | -    |
| hsa-miR-656 | SERPINE1  | SERPINE1  | -    |
| hsa-miR-656 | SETBP1    | SETBP1    | -    |
| hsa-miR-656 | SF3A1     | SF3A1     | -    |
| hsa-miR-656 | SFPQ      | SFPQ      | -    |
| hsa-miR-656 | SFRP2     | SFRP2     | -    |
| hsa-miR-656 | SFXN1     | SFXN1     | -    |
| hsa-miR-656 | SGCB      | SGCB      | -    |
| hsa-miR-656 | SGCD      | SGCD      | -    |
| hsa-miR-656 | SGK3      | SGK3      | -    |
| hsa-miR-656 | SGK494    | SGK494    | -    |
| hsa-miR-656 | SGMS2     | SGMS2     | -    |

|             |          |          |          |
|-------------|----------|----------|----------|
| hsa-miR-656 | SGPP1    | SGPP1    | -        |
| hsa-miR-656 | SGTB     | SGTB     | -        |
| hsa-miR-656 | SH2D4B   | SH2D4B   | -        |
| hsa-miR-656 | SH3BGRL2 | SH3BGRL2 | -        |
| hsa-miR-656 | SH3D19   | SH3D19   | -        |
| hsa-miR-656 | SH3RF1   | SH3RF1   | -        |
| hsa-miR-656 | SH3TC2   | SH3TC2   | -        |
| hsa-miR-656 | SH3YL1   | SH3YL1   | -        |
| hsa-miR-656 | SHANK2   | SHANK2   | -        |
| hsa-miR-656 | SHANK3   | SHANK3   | -        |
| hsa-miR-656 | SHISA3   | SHISA3   | -        |
| hsa-miR-656 | SHOX2    | SHOX2    | -        |
| hsa-miR-656 | SHROOM4  | SHROOM4  | -        |
| hsa-miR-656 | SIAH1    | SIAH1    | -        |
| hsa-miR-656 | -        | SIGLECP3 | SIGLECP3 |
| hsa-miR-656 | SIK3     | SIK3     | -        |
| hsa-miR-656 | SIKE1    | SIKE1    | -        |
| hsa-miR-656 | SIRPB2   | SIRPB2   | -        |
| hsa-miR-656 | SIX4     | SIX4     | -        |
| hsa-miR-656 | SKA2     | SKA2     | -        |
| hsa-miR-656 | SKA3     | SKA3     | -        |
| hsa-miR-656 | SKAP2    | SKAP2    | -        |
| hsa-miR-656 | SKP1     | SKP1     | -        |
| hsa-miR-656 | SLAIN1   | SLAIN1   | -        |
| hsa-miR-656 | SLAIN2   | SLAIN2   | -        |
| hsa-miR-656 | SLAMF6   | SLAMF6   | -        |
| hsa-miR-656 | SLAMF8   | SLAMF8   | -        |
| hsa-miR-656 | SLC10A4  | SLC10A4  | -        |
| hsa-miR-656 | SLC11A2  | SLC11A2  | -        |
| hsa-miR-656 | SLC13A1  | SLC13A1  | -        |
| hsa-miR-656 | -        | SLC15A1  | SLC15A1  |
| hsa-miR-656 | SLC16A1  | SLC16A1  | -        |
| hsa-miR-656 | SLC16A14 | SLC16A14 | -        |
| hsa-miR-656 | SLC16A2  | SLC16A2  | -        |
| hsa-miR-656 | SLC17A1  | SLC17A1  | -        |
| hsa-miR-656 | SLC17A5  | SLC17A5  | -        |
| hsa-miR-656 | SLC17A6  | SLC17A6  | -        |
| hsa-miR-656 | SLC17A8  | SLC17A8  | -        |
| hsa-miR-656 | SLC1A3   | SLC1A3   | -        |
| hsa-miR-656 | SLC20A2  | SLC20A2  | -        |
| hsa-miR-656 | SLC25A16 | SLC25A16 | -        |
| hsa-miR-656 | SLC25A21 | SLC25A21 | -        |
| hsa-miR-656 | SLC25A24 | SLC25A24 | -        |
| hsa-miR-656 | SLC25A30 | SLC25A30 | -        |
| hsa-miR-656 | SLC26A2  | SLC26A2  | -        |
| hsa-miR-656 | SLC26A3  | SLC26A3  | -        |
| hsa-miR-656 | SLC26A7  | SLC26A7  | -        |
| hsa-miR-656 | SLC26A9  | SLC26A9  | -        |
| hsa-miR-656 | SLC2A12  | SLC2A12  | -        |
| hsa-miR-656 | SLC2A13  | SLC2A13  | -        |
| hsa-miR-656 | SLC2A4RG | SLC2A4RG | -        |

|             |         |         |   |
|-------------|---------|---------|---|
| hsa-miR-656 | SLC30A5 | SLC30A5 | - |
| hsa-miR-656 | SLC30A6 | SLC30A6 | - |
| hsa-miR-656 | SLC30A9 | SLC30A9 | - |
| hsa-miR-656 | SLC33A1 | SLC33A1 | - |
| hsa-miR-656 | SLC35A5 | SLC35A5 | - |
| hsa-miR-656 | SLC35F1 | SLC35F1 | - |
| hsa-miR-656 | SLC36A4 | SLC36A4 | - |
| hsa-miR-656 | SLC38A1 | SLC38A1 | - |
| hsa-miR-656 | SLC38A4 | SLC38A4 | - |
| hsa-miR-656 | SLC38A6 | SLC38A6 | - |
| hsa-miR-656 | SLC39A8 | SLC39A8 | - |
| hsa-miR-656 | SLC39A9 | SLC39A9 | - |
| hsa-miR-656 | SLC41A2 | SLC41A2 | - |
| hsa-miR-656 | SLC44A5 | SLC44A5 | - |
| hsa-miR-656 | SLC45A2 | SLC45A2 | - |
| hsa-miR-656 | SLC46A1 | SLC46A1 | - |
| hsa-miR-656 | SLC4A10 | SLC4A10 | - |
| hsa-miR-656 | SLC4A7  | SLC4A7  | - |
| hsa-miR-656 | SLC4A8  | SLC4A8  | - |
| hsa-miR-656 | SLC5A7  | SLC5A7  | - |
| hsa-miR-656 | SLC6A1  | SLC6A1  | - |
| hsa-miR-656 | SLC6A15 | SLC6A15 | - |
| hsa-miR-656 | SLC7A1  | SLC7A1  | - |
| hsa-miR-656 | SLC9A11 | SLC9A11 | - |
| hsa-miR-656 | SLC9A2  | SLC9A2  | - |
| hsa-miR-656 | SLCO1A2 | SLCO1A2 | - |
| hsa-miR-656 | SLCO1B1 | SLCO1B1 | - |
| hsa-miR-656 | SLCO1C1 | SLCO1C1 | - |
| hsa-miR-656 | SLCO3A1 | SLCO3A1 | - |
| hsa-miR-656 | SLCO4C1 | SLCO4C1 | - |
| hsa-miR-656 | SLFN11  | SLFN11  | - |
| hsa-miR-656 | SLIT1   | SLIT1   | - |
| hsa-miR-656 | SLITRK3 | SLITRK3 | - |
| hsa-miR-656 | SLITRK4 | SLITRK4 | - |
| hsa-miR-656 | SLITRK6 | SLITRK6 | - |
| hsa-miR-656 | SLMO2   | SLMO2   | - |
| hsa-miR-656 | SMAD1   | SMAD1   | - |
| hsa-miR-656 | SMAD2   | SMAD2   | - |
| hsa-miR-656 | SMAD6   | SMAD6   | - |
| hsa-miR-656 | SMAD7   | SMAD7   | - |
| hsa-miR-656 | SMARCC1 | SMARCC1 | - |
| hsa-miR-656 | SMC6    | SMC6    | - |
| hsa-miR-656 | SMEK1   | SMEK1   | - |
| hsa-miR-656 | SMOC2   | SMOC2   | - |
| hsa-miR-656 | SMURF2  | SMURF2  | - |
| hsa-miR-656 | SNAI2   | SNAI2   | - |
| hsa-miR-656 | SNAP23  | SNAP23  | - |
| hsa-miR-656 | SNAP25  | SNAP25  | - |
| hsa-miR-656 | SNCA    | SNCA    | - |
| hsa-miR-656 | SNRK    | SNRK    | - |
| hsa-miR-656 | SNRNP48 | SNRNP48 | - |

|             |         |         |   |
|-------------|---------|---------|---|
| hsa-miR-656 | SNTB1   | SNTB1   | - |
| hsa-miR-656 | SNX1    | SNX1    | - |
| hsa-miR-656 | SNX10   | SNX10   | - |
| hsa-miR-656 | SNX13   | SNX13   | - |
| hsa-miR-656 | SNX14   | SNX14   | - |
| hsa-miR-656 | SNX15   | SNX15   | - |
| hsa-miR-656 | SNX16   | SNX16   | - |
| hsa-miR-656 | SNX20   | SNX20   | - |
| hsa-miR-656 | SNX30   | SNX30   | - |
| hsa-miR-656 | SNX4    | SNX4    | - |
| hsa-miR-656 | SNX9    | SNX9    | - |
| hsa-miR-656 | SOAT1   | SOAT1   | - |
| hsa-miR-656 | SOBP    | SOBP    | - |
| hsa-miR-656 | SOCS4   | SOCS4   | - |
| hsa-miR-656 | SOCS5   | SOCS5   | - |
| hsa-miR-656 | SOCS6   | SOCS6   | - |
| hsa-miR-656 | SORBS1  | SORBS1  | - |
| hsa-miR-656 | SOS1    | SOS1    | - |
| hsa-miR-656 | SOX11   | SOX11   | - |
| hsa-miR-656 | SOX2    | SOX2    | - |
| hsa-miR-656 | SOX21   | SOX21   | - |
| hsa-miR-656 | SOX4    | SOX4    | - |
| hsa-miR-656 | SOX6    | SOX6    | - |
| hsa-miR-656 | SOX9    | SOX9    | - |
| hsa-miR-656 | SP4     | SP4     | - |
| hsa-miR-656 | SPAG16  | SPAG16  | - |
| hsa-miR-656 | SPAG6   | SPAG6   | - |
| hsa-miR-656 | SPAG9   | SPAG9   | - |
| hsa-miR-656 | SPAST   | SPAST   | - |
| hsa-miR-656 | SPATA18 | SPATA18 | - |
| hsa-miR-656 | SPATA2  | SPATA2  | - |
| hsa-miR-656 | SPATA5  | SPATA5  | - |
| hsa-miR-656 | SPATA6  | SPATA6  | - |
| hsa-miR-656 | SPATA9  | SPATA9  | - |
| hsa-miR-656 | SPEN    | SPEN    | - |
| hsa-miR-656 | SPESP1  | SPESP1  | - |
| hsa-miR-656 | SPHKAP  | SPHKAP  | - |
| hsa-miR-656 | SPIN1   | SPIN1   | - |
| hsa-miR-656 | SPIN3   | SPIN3   | - |
| hsa-miR-656 | SPIN4   | SPIN4   | - |
| hsa-miR-656 | SPIRE1  | SPIRE1  | - |
| hsa-miR-656 | SPIRE2  | SPIRE2  | - |
| hsa-miR-656 | SPOPL   | SPOPL   | - |
| hsa-miR-656 | SPRY1   | SPRY1   | - |
| hsa-miR-656 | SPRY2   | SPRY2   | - |
| hsa-miR-656 | SPRY3   | SPRY3   | - |
| hsa-miR-656 | SPSB1   | SPSB1   | - |
| hsa-miR-656 | SPTY2D1 | SPTY2D1 | - |
| hsa-miR-656 | SRCIN1  | SRCIN1  | - |
| hsa-miR-656 | SRD5A3  | SRD5A3  | - |
| hsa-miR-656 | SRI     | SRI     | - |

|             |            |            |        |
|-------------|------------|------------|--------|
| hsa-miR-656 | SRP54      | SRP54      | -      |
| hsa-miR-656 | SRPK2      | SRPK2      | -      |
| hsa-miR-656 | SS18       | SS18       | -      |
| hsa-miR-656 | SS18L1     | SS18L1     | -      |
| hsa-miR-656 | -          | SSB        | SSB    |
| hsa-miR-656 | SSH1       | SSH1       | -      |
| hsa-miR-656 | SSH2       | SSH2       | -      |
| hsa-miR-656 | SSX2IP     | SSX2IP     | -      |
| hsa-miR-656 | ST6GAL1    | ST6GAL1    | -      |
| hsa-miR-656 | ST6GAL2    | ST6GAL2    | -      |
| hsa-miR-656 | ST6GALNAC3 | ST6GALNAC3 | -      |
| hsa-miR-656 | ST7L       | ST7L       | -      |
| hsa-miR-656 | ST8SIA4    | ST8SIA4    | -      |
| hsa-miR-656 | STAG2      | STAG2      | -      |
| hsa-miR-656 | STAM       | STAM       | -      |
| hsa-miR-656 | STARD13    | STARD13    | -      |
| hsa-miR-656 | STARD3NL   | STARD3NL   | -      |
| hsa-miR-656 | STARD8     | STARD8     | -      |
| hsa-miR-656 | STAT1      | STAT1      | -      |
| hsa-miR-656 | STAU2      | STAU2      | -      |
| hsa-miR-656 | STC1       | STC1       | -      |
| hsa-miR-656 | STEAP2     | STEAP2     | -      |
| hsa-miR-656 | STEAP4     | STEAP4     | -      |
| hsa-miR-656 | STK38L     | STK38L     | -      |
| hsa-miR-656 | STK39      | STK39      | -      |
| hsa-miR-656 | STOM       | STOM       | -      |
| hsa-miR-656 | STON1      | STON1      | -      |
| hsa-miR-656 | STRN       | STRN       | -      |
| hsa-miR-656 | STX12      | STX12      | -      |
| hsa-miR-656 | STX16      | STX16      | -      |
| hsa-miR-656 | STX17      | STX17      | -      |
| hsa-miR-656 | STXBP4     | STXBP4     | -      |
| hsa-miR-656 | STXBP5L    | STXBP5L    | -      |
| hsa-miR-656 | SUB1       | SUB1       | -      |
| hsa-miR-656 | -          | SUCLA2     | SUCLA2 |
| hsa-miR-656 | SUCLG2     | SUCLG2     | -      |
| hsa-miR-656 | SULF1      | SULF1      | -      |
| hsa-miR-656 | SUPT7L     | SUPT7L     | -      |
| hsa-miR-656 | SUV420H1   | SUV420H1   | -      |
| hsa-miR-656 | SUZ12      | SUZ12      | -      |
| hsa-miR-656 | SVIP       | SVIP       | -      |
| hsa-miR-656 | -          | SYCP3      | SYCP3  |
| hsa-miR-656 | -          | SYDE2      | SYDE2  |
| hsa-miR-656 | SYN2       | SYN2       | -      |
| hsa-miR-656 | SYN3       | SYN3       | -      |
| hsa-miR-656 | SYNC       | SYNC       | -      |
| hsa-miR-656 | SYNCRIP    | SYNCRIP    | -      |
| hsa-miR-656 | SYNGR1     | SYNGR1     | -      |
| hsa-miR-656 | SYNM       | SYNM       | -      |
| hsa-miR-656 | SYNPO2     | SYNPO2     | -      |
| hsa-miR-656 | SYNRG      | SYNRG      | -      |

|             |         |         |         |
|-------------|---------|---------|---------|
| hsa-miR-656 | SYT1    | SYT1    | -       |
| hsa-miR-656 | SYT14   | SYT14   | -       |
| hsa-miR-656 | SYT15   | SYT15   | -       |
| hsa-miR-656 | SYT4    | SYT4    | -       |
| hsa-miR-656 | SYT9    | SYT9    | -       |
| hsa-miR-656 | TAB2    | TAB2    | -       |
| hsa-miR-656 | TACC1   | TACC1   | -       |
| hsa-miR-656 | TADA1   | TADA1   | -       |
| hsa-miR-656 | TADA3   | TADA3   | -       |
| hsa-miR-656 | TAF1B   | TAF1B   | -       |
| hsa-miR-656 | TAF4B   | TAF4B   | -       |
| hsa-miR-656 | -       | TAF5L   | TAF5L   |
| hsa-miR-656 | TANK    | TANK    | -       |
| hsa-miR-656 | TARDBP  | TARDBP  | -       |
| hsa-miR-656 | TAS2R20 | TAS2R20 | -       |
| hsa-miR-656 | TAT     | TAT     | -       |
| hsa-miR-656 | TBC1D19 | TBC1D19 | -       |
| hsa-miR-656 | TBC1D23 | TBC1D23 | -       |
| hsa-miR-656 | TBC1D5  | TBC1D5  | -       |
| hsa-miR-656 | -       | TBC1D7  | TBC1D7  |
| hsa-miR-656 | TBC1D8  | TBC1D8  | -       |
| hsa-miR-656 | TBC1D8B | TBC1D8B | -       |
| hsa-miR-656 | TBL1X   | TBL1X   | -       |
| hsa-miR-656 | TBL1XR1 | TBL1XR1 | -       |
| hsa-miR-656 | TBPL1   | TBPL1   | -       |
| hsa-miR-656 | TBR1    | TBR1    | -       |
| hsa-miR-656 | TBRG1   | TBRG1   | -       |
| hsa-miR-656 | TBX18   | TBX18   | -       |
| hsa-miR-656 | TBX5    | TBX5    | -       |
| hsa-miR-656 | -       | TBXAS1  | TBXAS1  |
| hsa-miR-656 | TC2N    | TC2N    | -       |
| hsa-miR-656 | TCEA1   | TCEA1   | -       |
| hsa-miR-656 | TCEAL4  | TCEAL4  | -       |
| hsa-miR-656 | TCERG1L | TCERG1L | -       |
| hsa-miR-656 | TCHHL1  | TCHHL1  | -       |
| hsa-miR-656 | TCHP    | TCHP    | -       |
| hsa-miR-656 | TCP10L2 | TCP10L2 | -       |
| hsa-miR-656 | -       | TCP11L2 | TCP11L2 |
| hsa-miR-656 | TCTN1   | TCTN1   | -       |
| hsa-miR-656 | TDG     | TDG     | -       |
| hsa-miR-656 | TEAD2   | TEAD2   | -       |
| hsa-miR-656 | TEC     | TEC     | -       |
| hsa-miR-656 | TECPR2  | TECPR2  | -       |
| hsa-miR-656 | TEK     | TEK     | -       |
| hsa-miR-656 | TET1    | TET1    | -       |
| hsa-miR-656 | TET2    | TET2    | -       |
| hsa-miR-656 | TEX12   | TEX12   | -       |
| hsa-miR-656 | -       | TEX14   | TEX14   |
| hsa-miR-656 | TEX2    | TEX2    | -       |
| hsa-miR-656 | TFAP2D  | TFAP2D  | -       |
| hsa-miR-656 | TFEC    | TFEC    | -       |

|             |                |                |      |
|-------------|----------------|----------------|------|
| hsa-miR-656 | TFPI2          | TFPI2          | -    |
| hsa-miR-656 | TFRC           | TFRC           | -    |
| hsa-miR-656 | TGFA           | TGFA           | -    |
| hsa-miR-656 | TGFB2          | TGFB2          | -    |
| hsa-miR-656 | TGFBR2         | TGFBR2         | -    |
| hsa-miR-656 | TGFBR3         | TGFBR3         | -    |
| hsa-miR-656 | TGS1           | TGS1           | -    |
| hsa-miR-656 | THAP2          | THAP2          | -    |
| hsa-miR-656 | THAP3          | THAP3          | -    |
| hsa-miR-656 | THAP5          | THAP5          | -    |
| hsa-miR-656 | THAP6          | THAP6          | -    |
| hsa-miR-656 | THBS2          | THBS2          | -    |
| hsa-miR-656 | THEMIS         | THEMIS         | -    |
| hsa-miR-656 | THRB           | THRB           | -    |
| hsa-miR-656 | THRSP          | THRSP          | -    |
| hsa-miR-656 | THSD7B         | THSD7B         | -    |
| hsa-miR-656 | TIA1           | TIA1           | -    |
| hsa-miR-656 | TIMP3          | TIMP3          | -    |
| hsa-miR-656 | -              | TJP2           | TJP2 |
| hsa-miR-656 | TLE4           | TLE4           | -    |
| hsa-miR-656 | TLK1           | TLK1           | -    |
| hsa-miR-656 | TLL2           | TLL2           | -    |
| hsa-miR-656 | TLR10          | TLR10          | -    |
| hsa-miR-656 | TLR4           | TLR4           | -    |
| hsa-miR-656 | TM2D2          | TM2D2          | -    |
| hsa-miR-656 | TM9SF3         | TM9SF3         | -    |
| hsa-miR-656 | TMBIM6         | TMBIM6         | -    |
| hsa-miR-656 | TMC7           | TMC7           | -    |
| hsa-miR-656 | TMC8           | TMC8           | -    |
| hsa-miR-656 | TMCO1          | TMCO1          | -    |
| hsa-miR-656 | TMED10         | TMED10         | -    |
| hsa-miR-656 | TMED2          | TMED2          | -    |
| hsa-miR-656 | TMED7          | TMED7          | -    |
| hsa-miR-656 | TMEFF1         | TMEFF1         | -    |
| hsa-miR-656 | TMEM106B       | TMEM106B       | -    |
| hsa-miR-656 | TMEM108        | TMEM108        | -    |
| hsa-miR-656 | TMEM132D       | TMEM132D       | -    |
| hsa-miR-656 | TMEM135        | TMEM135        | -    |
| hsa-miR-656 | TMEM154        | TMEM154        | -    |
| hsa-miR-656 | TMEM161B       | TMEM161B       | -    |
| hsa-miR-656 | TMEM168        | TMEM168        | -    |
| hsa-miR-656 | TMEM184B       | TMEM184B       | -    |
| hsa-miR-656 | TMEM189        | TMEM189        | -    |
| hsa-miR-656 | TMEM189-UBE2V1 | TMEM189-UBE2V1 | -    |
| hsa-miR-656 | TMEM196        | TMEM196        | -    |
| hsa-miR-656 | TMEM218        | TMEM218        | -    |
| hsa-miR-656 | TMEM225        | TMEM225        | -    |
| hsa-miR-656 | TMEM229A       | TMEM229A       | -    |
| hsa-miR-656 | TMEM25         | TMEM25         | -    |
| hsa-miR-656 | TMEM27         | TMEM27         | -    |



|             |           |           |   |
|-------------|-----------|-----------|---|
| hsa-miR-656 | TMEM30A   | TMEM30A   | - |
| hsa-miR-656 | TMEM33    | TMEM33    | - |
| hsa-miR-656 | TMEM35    | TMEM35    | - |
| hsa-miR-656 | TMEM39A   | TMEM39A   | - |
| hsa-miR-656 | TMEM47    | TMEM47    | - |
| hsa-miR-656 | TMEM48    | TMEM48    | - |
| hsa-miR-656 | TMEM56    | TMEM56    | - |
| hsa-miR-656 | TMEM65    | TMEM65    | - |
| hsa-miR-656 | TMEM66    | TMEM66    | - |
| hsa-miR-656 | TMEM71    | TMEM71    | - |
| hsa-miR-656 | TMEM74    | TMEM74    | - |
| hsa-miR-656 | TMEM87A   | TMEM87A   | - |
| hsa-miR-656 | TMEM87B   | TMEM87B   | - |
| hsa-miR-656 | TMEM99    | TMEM99    | - |
| hsa-miR-656 | TMEM9B    | TMEM9B    | - |
| hsa-miR-656 | TMF1      | TMF1      | - |
| hsa-miR-656 | TMLHE     | TMLHE     | - |
| hsa-miR-656 | TMOD1     | TMOD1     | - |
| hsa-miR-656 | TMOD3     | TMOD3     | - |
| hsa-miR-656 | TMPO      | TMPO      | - |
| hsa-miR-656 | TMPRSS11B | TMPRSS11B | - |
| hsa-miR-656 | TMPRSS11D | TMPRSS11D | - |
| hsa-miR-656 | TMPRSS15  | TMPRSS15  | - |
| hsa-miR-656 | TMPRSS3   | TMPRSS3   | - |
| hsa-miR-656 | TMTC1     | TMTC1     | - |
| hsa-miR-656 | TMTC2     | TMTC2     | - |
| hsa-miR-656 | TMTC3     | TMTC3     | - |
| hsa-miR-656 | TNC       | TNC       | - |
| hsa-miR-656 | TNFAIP3   | TNFAIP3   | - |
| hsa-miR-656 | TNFRSF11B | TNFRSF11B | - |
| hsa-miR-656 | TNFRSF9   | TNFRSF9   | - |
| hsa-miR-656 | TNFSF11   | TNFSF11   | - |
| hsa-miR-656 | TNFSF4    | TNFSF4    | - |
| hsa-miR-656 | TNFSF9    | TNFSF9    | - |
| hsa-miR-656 | TNKS2     | TNKS2     | - |
| hsa-miR-656 | TNNI3K    | TNNI3K    | - |
| hsa-miR-656 | TNPO1     | TNPO1     | - |
| hsa-miR-656 | TNS1      | TNS1      | - |
| hsa-miR-656 | TOB2      | TOB2      | - |
| hsa-miR-656 | TOR1AIP1  | TOR1AIP1  | - |
| hsa-miR-656 | TOR1AIP2  | TOR1AIP2  | - |
| hsa-miR-656 | TP53INP1  | TP53INP1  | - |
| hsa-miR-656 | TP53INP2  | TP53INP2  | - |
| hsa-miR-656 | TP53RK    | TP53RK    | - |
| hsa-miR-656 | TP63      | TP63      | - |
| hsa-miR-656 | TPD52     | TPD52     | - |
| hsa-miR-656 | TPK1      | TPK1      | - |
| hsa-miR-656 | TPR       | TPR       | - |
| hsa-miR-656 | TPST2     | TPST2     | - |
| hsa-miR-656 | TRAF5     | TRAF5     | - |
| hsa-miR-656 | TRAF6     | TRAF6     | - |

|             |          |          |       |
|-------------|----------|----------|-------|
| hsa-miR-656 | TRAF7    | TRAF7    | -     |
| hsa-miR-656 | TRAM1L1  | TRAM1L1  | -     |
| hsa-miR-656 | TRAPPC10 | TRAPPC10 | -     |
| hsa-miR-656 | TRAPPC6B | TRAPPC6B | -     |
| hsa-miR-656 | TRAT1    | TRAT1    | -     |
| hsa-miR-656 | TRDN     | TRDN     | -     |
| hsa-miR-656 | TRERF1   | TRERF1   | -     |
| hsa-miR-656 | TRIM22   | TRIM22   | -     |
| hsa-miR-656 | TRIM23   | TRIM23   | -     |
| hsa-miR-656 | TRIM25   | TRIM25   | -     |
| hsa-miR-656 | TRIM27   | TRIM27   | -     |
| hsa-miR-656 | TRIM36   | TRIM36   | -     |
| hsa-miR-656 | TRIM38   | TRIM38   | -     |
| hsa-miR-656 | TRIM39   | TRIM39   | -     |
| hsa-miR-656 | TRIM58   | TRIM58   | -     |
| hsa-miR-656 | TRIM6    | TRIM6    | -     |
| hsa-miR-656 | TRIM8    | TRIM8    | -     |
| hsa-miR-656 | TRIP13   | TRIP13   | -     |
| hsa-miR-656 | TRPC1    | TRPC1    | -     |
| hsa-miR-656 | TRPC3    | TRPC3    | -     |
| hsa-miR-656 | TRPM6    | TRPM6    | -     |
| hsa-miR-656 | TRPS1    | TRPS1    | -     |
| hsa-miR-656 | TRUB1    | TRUB1    | -     |
| hsa-miR-656 | TSM      | TSM      | -     |
| hsa-miR-656 | TSHZ3    | TSHZ3    | -     |
| hsa-miR-656 | TSN      | TSN      | -     |
| hsa-miR-656 | TSNAX    | TSNAX    | -     |
| hsa-miR-656 | TSPAN12  | TSPAN12  | -     |
| hsa-miR-656 | TSPAN2   | TSPAN2   | -     |
| hsa-miR-656 | TSPYL6   | TSPYL6   | -     |
| hsa-miR-656 | TSSK1B   | TSSK1B   | -     |
| hsa-miR-656 | TTC14    | TTC14    | -     |
| hsa-miR-656 | TTC22    | TTC22    | -     |
| hsa-miR-656 | TTC33    | TTC33    | -     |
| hsa-miR-656 | TTC9     | TTC9     | -     |
| hsa-miR-656 | TTF2     | TTF2     | -     |
| hsa-miR-656 | TLL13    | TLL13    | -     |
| hsa-miR-656 | -        | TTN      | TTN   |
| hsa-miR-656 | TTYH3    | TTYH3    | -     |
| hsa-miR-656 | TUBD1    | TUBD1    | -     |
| hsa-miR-656 | -        | TUBE1    | TUBE1 |
| hsa-miR-656 | TWF1     | TWF1     | -     |
| hsa-miR-656 | TXK      | TXK      | -     |
| hsa-miR-656 | TXLNB    | TXLNB    | -     |
| hsa-miR-656 | TXLNG    | TXLNG    | -     |
| hsa-miR-656 | TXNDC16  | TXNDC16  | -     |
| hsa-miR-656 | TYW1B    | TYW1B    | -     |
| hsa-miR-656 | TYW3     | TYW3     | -     |
| hsa-miR-656 | UBA3     | UBA3     | -     |
| hsa-miR-656 | UBA6     | UBA6     | -     |
| hsa-miR-656 | UBE2B    | UBE2B    | -     |

|             |          |          |       |
|-------------|----------|----------|-------|
| hsa-miR-656 | UBE2D1   | UBE2D1   | -     |
| hsa-miR-656 | UBE2D3   | UBE2D3   | -     |
| hsa-miR-656 | UBE2E2   | UBE2E2   | -     |
| hsa-miR-656 | UBE2G1   | UBE2G1   | -     |
| hsa-miR-656 | UBE2J1   | UBE2J1   | -     |
| hsa-miR-656 | UBE2K    | UBE2K    | -     |
| hsa-miR-656 | UBE2QL1  | UBE2QL1  | -     |
| hsa-miR-656 | UBE2V1   | UBE2V1   | -     |
| hsa-miR-656 | UBE2V2   | UBE2V2   | -     |
| hsa-miR-656 | UBE2W    | UBE2W    | -     |
| hsa-miR-656 | UBE4A    | UBE4A    | -     |
| hsa-miR-656 | UBIAD1   | UBIAD1   | -     |
| hsa-miR-656 | UBXN2B   | UBXN2B   | -     |
| hsa-miR-656 | UBXN4    | UBXN4    | -     |
| hsa-miR-656 | UEVLD    | UEVLD    | -     |
| hsa-miR-656 | UGT2A1   | UGT2A1   | -     |
| hsa-miR-656 | UGT2A2   | UGT2A2   | -     |
| hsa-miR-656 | UGT2B17  | UGT2B17  | -     |
| hsa-miR-656 | UGT2B28  | UGT2B28  | -     |
| hsa-miR-656 | UHMK1    | UHMK1    | -     |
| hsa-miR-656 | UHRF1BP1 | UHRF1BP1 | -     |
| hsa-miR-656 | ULK2     | ULK2     | -     |
| hsa-miR-656 | UNC13B   | UNC13B   | -     |
| hsa-miR-656 | UNKL     | UNKL     | -     |
| hsa-miR-656 | UPRT     | UPRT     | -     |
| hsa-miR-656 | UQCRC2   | UQCRC2   | -     |
| hsa-miR-656 | USH2A    | USH2A    | -     |
| hsa-miR-656 | USO1     | USO1     | -     |
| hsa-miR-656 | USP12    | USP12    | -     |
| hsa-miR-656 | USP25    | USP25    | -     |
| hsa-miR-656 | USP32    | USP32    | -     |
| hsa-miR-656 | USP37    | USP37    | -     |
| hsa-miR-656 | -        | USP38    | USP38 |
| hsa-miR-656 | USP43    | USP43    | -     |
| hsa-miR-656 | USP45    | USP45    | -     |
| hsa-miR-656 | USP46    | USP46    | -     |
| hsa-miR-656 | USP49    | USP49    | -     |
| hsa-miR-656 | USP6NL   | USP6NL   | -     |
| hsa-miR-656 | USP9X    | USP9X    | -     |
| hsa-miR-656 | UTP15    | UTP15    | -     |
| hsa-miR-656 | UTP23    | UTP23    | -     |
| hsa-miR-656 | UTP3     | UTP3     | -     |
| hsa-miR-656 | UTRN     | UTRN     | -     |
| hsa-miR-656 | UTY      | UTY      | -     |
| hsa-miR-656 | UVRAG    | UVRAG    | -     |
| hsa-miR-656 | VAMP2    | VAMP2    | -     |
| hsa-miR-656 | VAMP4    | VAMP4    | -     |
| hsa-miR-656 | VANGL2   | VANGL2   | -     |
| hsa-miR-656 | VAPA     | VAPA     | -     |
| hsa-miR-656 | VAX1     | VAX1     | -     |
| hsa-miR-656 | VCAN     | VCAN     | -     |

|             |         |         |       |
|-------------|---------|---------|-------|
| hsa-miR-656 | VCPIP1  | VCPIP1  | -     |
| hsa-miR-656 | VDAC1   | VDAC1   | -     |
| hsa-miR-656 | VDAC2   | VDAC2   | -     |
| hsa-miR-656 | VDAC3   | VDAC3   | -     |
| hsa-miR-656 | -       | VEGFC   | VEGFC |
| hsa-miR-656 | VEZT    | VEZT    | -     |
| hsa-miR-656 | VNN1    | VNN1    | -     |
| hsa-miR-656 | VPS13A  | VPS13A  | -     |
| hsa-miR-656 | VPS13B  | VPS13B  | -     |
| hsa-miR-656 | VPS13C  | VPS13C  | -     |
| hsa-miR-656 | VPS13D  | VPS13D  | -     |
| hsa-miR-656 | VPS24   | VPS24   | -     |
| hsa-miR-656 | VPS29   | VPS29   | -     |
| hsa-miR-656 | VPS37A  | VPS37A  | -     |
| hsa-miR-656 | VPS4B   | VPS4B   | -     |
| hsa-miR-656 | VSTM2B  | VSTM2B  | -     |
| hsa-miR-656 | WASL    | WASL    | -     |
| hsa-miR-656 | -       | WBP11   | WBP11 |
| hsa-miR-656 | WBP2    | WBP2    | -     |
| hsa-miR-656 | WDFY3   | WDFY3   | -     |
| hsa-miR-656 | WDR11   | WDR11   | -     |
| hsa-miR-656 | -       | WDR12   | WDR12 |
| hsa-miR-656 | WDR17   | WDR17   | -     |
| hsa-miR-656 | WDR20   | WDR20   | -     |
| hsa-miR-656 | WDR26   | WDR26   | -     |
| hsa-miR-656 | WDR27   | WDR27   | -     |
| hsa-miR-656 | WDR33   | WDR33   | -     |
| hsa-miR-656 | WDR44   | WDR44   | -     |
| hsa-miR-656 | WDR47   | WDR47   | -     |
| hsa-miR-656 | WDR48   | WDR48   | -     |
| hsa-miR-656 | WDR52   | WDR52   | -     |
| hsa-miR-656 | WDR55   | WDR55   | -     |
| hsa-miR-656 | WDR64   | WDR64   | -     |
| hsa-miR-656 | WDR92   | WDR92   | -     |
| hsa-miR-656 | WIPF1   | WIPF1   | -     |
| hsa-miR-656 | WISP1   | WISP1   | -     |
| hsa-miR-656 | WLS     | WLS     | -     |
| hsa-miR-656 | WNT16   | WNT16   | -     |
| hsa-miR-656 | WNT7B   | WNT7B   | -     |
| hsa-miR-656 | WSB2    | WSB2    | -     |
| hsa-miR-656 | WWP1    | WWP1    | -     |
| hsa-miR-656 | XK      | XK      | -     |
| hsa-miR-656 | XKRY    | XKRY    | -     |
| hsa-miR-656 | XPNPEP3 | XPNPEP3 | -     |
| hsa-miR-656 | XPO4    | XPO4    | -     |
| hsa-miR-656 | XRN1    | XRN1    | -     |
| hsa-miR-656 | XRRA1   | XRRA1   | -     |
| hsa-miR-656 | XYLT1   | XYLT1   | -     |
| hsa-miR-656 | YAF2    | YAF2    | -     |
| hsa-miR-656 | YIPF5   | YIPF5   | -     |
| hsa-miR-656 | YPEL2   | YPEL2   | -     |

|             |         |         |       |
|-------------|---------|---------|-------|
| hsa-miR-656 | YPEL5   | YPEL5   | -     |
| hsa-miR-656 | YWHAZ   | YWHAZ   | -     |
| hsa-miR-656 | ZADH2   | ZADH2   | -     |
| hsa-miR-656 | ZAK     | ZAK     | -     |
| hsa-miR-656 | ZBTB11  | ZBTB11  | -     |
| hsa-miR-656 | ZBTB38  | ZBTB38  | -     |
| hsa-miR-656 | ZBTB41  | ZBTB41  | -     |
| hsa-miR-656 | ZBTB44  | ZBTB44  | -     |
| hsa-miR-656 | ZBTB6   | ZBTB6   | -     |
| hsa-miR-656 | ZBTB7A  | ZBTB7A  | -     |
| hsa-miR-656 | ZBTB8A  | ZBTB8A  | -     |
| hsa-miR-656 | ZBTB9   | ZBTB9   | -     |
| hsa-miR-656 | ZC3H12C | ZC3H12C | -     |
| hsa-miR-656 | ZC3H6   | ZC3H6   | -     |
| hsa-miR-656 | ZC3H7A  | ZC3H7A  | -     |
| hsa-miR-656 | ZC3H7B  | ZC3H7B  | -     |
| hsa-miR-656 | ZC3HAV1 | ZC3HAV1 | -     |
| hsa-miR-656 | ZCCHC10 | ZCCHC10 | -     |
| hsa-miR-656 | ZCCHC14 | ZCCHC14 | -     |
| hsa-miR-656 | ZCCHC8  | ZCCHC8  | -     |
| hsa-miR-656 | ZDHHC12 | ZDHHC12 | -     |
| hsa-miR-656 | ZDHHC15 | ZDHHC15 | -     |
| hsa-miR-656 | ZDHHC2  | ZDHHC2  | -     |
| hsa-miR-656 | ZDHHC5  | ZDHHC5  | -     |
| hsa-miR-656 | ZEB1    | ZEB1    | -     |
| hsa-miR-656 | ZEB2    | ZEB2    | -     |
| hsa-miR-656 | ZFAND5  | ZFAND5  | -     |
| hsa-miR-656 | ZFC3H1  | ZFC3H1  | -     |
| hsa-miR-656 | ZFP2    | ZFP2    | -     |
| hsa-miR-656 | ZFP30   | ZFP30   | -     |
| hsa-miR-656 | ZFP36L1 | ZFP36L1 | -     |
| hsa-miR-656 | ZFP36L2 | ZFP36L2 | -     |
| hsa-miR-656 | ZFP64   | ZFP64   | -     |
| hsa-miR-656 | ZFP91   | ZFP91   | -     |
| hsa-miR-656 | ZFR     | ZFR     | -     |
| hsa-miR-656 | ZFX     | ZFX     | -     |
| hsa-miR-656 | ZFY     | ZFY     | -     |
| hsa-miR-656 | ZFYVE16 | ZFYVE16 | -     |
| hsa-miR-656 | ZFYVE21 | ZFYVE21 | -     |
| hsa-miR-656 | ZHX1    | ZHX1    | -     |
| hsa-miR-656 | ZIC1    | ZIC1    | -     |
| hsa-miR-656 | ZIC4    | ZIC4    | -     |
| hsa-miR-656 | ZIC5    | ZIC5    | -     |
| hsa-miR-656 | ZKSCAN2 | ZKSCAN2 | -     |
| hsa-miR-656 | ZMIZ1   | ZMIZ1   | -     |
| hsa-miR-656 | ZMYM1   | ZMYM1   | -     |
| hsa-miR-656 | -       | ZMYM6   | ZMYM6 |
| hsa-miR-656 | ZNF10   | ZNF10   | -     |
| hsa-miR-656 | ZNF100  | ZNF100  | -     |
| hsa-miR-656 | ZNF107  | ZNF107  | -     |
| hsa-miR-656 | ZNF117  | ZNF117  | -     |

|             |         |         |        |
|-------------|---------|---------|--------|
| hsa-miR-656 | ZNF138  | ZNF138  | -      |
| hsa-miR-656 | ZNF148  | ZNF148  | -      |
| hsa-miR-656 | ZNF167  | ZNF167  | -      |
| hsa-miR-656 | ZNF175  | ZNF175  | -      |
| hsa-miR-656 | ZNF180  | ZNF180  | -      |
| hsa-miR-656 | ZNF181  | ZNF181  | -      |
| hsa-miR-656 | ZNF192  | ZNF192  | -      |
| hsa-miR-656 | ZNF200  | ZNF200  | -      |
| hsa-miR-656 | ZNF208  | ZNF208  | -      |
| hsa-miR-656 | -       | ZNF215  | ZNF215 |
| hsa-miR-656 | ZNF217  | ZNF217  | -      |
| hsa-miR-656 | ZNF227  | ZNF227  | -      |
| hsa-miR-656 | ZNF230  | ZNF230  | -      |
| hsa-miR-656 | ZNF236  | ZNF236  | -      |
| hsa-miR-656 | ZNF238  | ZNF238  | -      |
| hsa-miR-656 | ZNF24   | ZNF24   | -      |
| hsa-miR-656 | ZNF25   | ZNF25   | -      |
| hsa-miR-656 | ZNF254  | ZNF254  | -      |
| hsa-miR-656 | ZNF26   | ZNF26   | -      |
| hsa-miR-656 | ZNF260  | ZNF260  | -      |
| hsa-miR-656 | ZNF273  | ZNF273  | -      |
| hsa-miR-656 | ZNF275  | ZNF275  | -      |
| hsa-miR-656 | ZNF277  | ZNF277  | -      |
| hsa-miR-656 | ZNF28   | ZNF28   | -      |
| hsa-miR-656 | ZNF280C | ZNF280C | -      |
| hsa-miR-656 | ZNF280D | ZNF280D | -      |
| hsa-miR-656 | ZNF286A | ZNF286A | -      |
| hsa-miR-656 | ZNF286B | ZNF286B | -      |
| hsa-miR-656 | ZNF295  | ZNF295  | -      |
| hsa-miR-656 | ZNF30   | ZNF30   | -      |
| hsa-miR-656 | ZNF322A | ZNF322A | -      |
| hsa-miR-656 | ZNF329  | ZNF329  | -      |
| hsa-miR-656 | ZNF330  | ZNF330  | -      |
| hsa-miR-656 | ZNF33B  | ZNF33B  | -      |
| hsa-miR-656 | ZNF37A  | ZNF37A  | -      |
| hsa-miR-656 | ZNF382  | ZNF382  | -      |
| hsa-miR-656 | ZNF43   | ZNF43   | -      |
| hsa-miR-656 | ZNF440  | ZNF440  | -      |
| hsa-miR-656 | ZNF449  | ZNF449  | -      |
| hsa-miR-656 | ZNF451  | ZNF451  | -      |
| hsa-miR-656 | ZNF461  | ZNF461  | -      |
| hsa-miR-656 | ZNF470  | ZNF470  | -      |
| hsa-miR-656 | ZNF471  | ZNF471  | -      |
| hsa-miR-656 | ZNF485  | ZNF485  | -      |
| hsa-miR-656 | ZNF492  | ZNF492  | -      |
| hsa-miR-656 | ZNF501  | ZNF501  | -      |
| hsa-miR-656 | ZNF507  | ZNF507  | -      |
| hsa-miR-656 | ZNF529  | ZNF529  | -      |
| hsa-miR-656 | ZNF546  | ZNF546  | -      |
| hsa-miR-656 | ZNF547  | ZNF547  | -      |
| hsa-miR-656 | ZNF548  | ZNF548  | -      |

|                |         |         |        |
|----------------|---------|---------|--------|
| hsa-miR-656    | ZNF549  | ZNF549  | -      |
| hsa-miR-656    | ZNF558  | ZNF558  | -      |
| hsa-miR-656    | ZNF562  | ZNF562  | -      |
| hsa-miR-656    | ZNF566  | ZNF566  | -      |
| hsa-miR-656    | ZNF569  | ZNF569  | -      |
| hsa-miR-656    | ZNF572  | ZNF572  | -      |
| hsa-miR-656    | ZNF585B | ZNF585B | -      |
| hsa-miR-656    | ZNF614  | ZNF614  | -      |
| hsa-miR-656    | ZNF615  | ZNF615  | -      |
| hsa-miR-656    | ZNF621  | ZNF621  | -      |
| hsa-miR-656    | ZNF624  | ZNF624  | -      |
| hsa-miR-656    | ZNF626  | ZNF626  | -      |
| hsa-miR-656    | ZNF655  | ZNF655  | -      |
| hsa-miR-656    | ZNF676  | ZNF676  | -      |
| hsa-miR-656    | ZNF681  | ZNF681  | -      |
| hsa-miR-656    | ZNF684  | ZNF684  | -      |
| hsa-miR-656    | ZNF697  | ZNF697  | -      |
| hsa-miR-656    | ZNF701  | ZNF701  | -      |
| hsa-miR-656    | ZNF706  | ZNF706  | -      |
| hsa-miR-656    | ZNF714  | ZNF714  | -      |
| hsa-miR-656    | ZNF716  | ZNF716  | -      |
| hsa-miR-656    | ZNF737  | ZNF737  | -      |
| hsa-miR-656    | ZNF740  | ZNF740  | -      |
| hsa-miR-656    | ZNF749  | ZNF749  | -      |
| hsa-miR-656    | ZNF776  | ZNF776  | -      |
| hsa-miR-656    | ZNF780B | ZNF780B | -      |
| hsa-miR-656    | ZNF792  | ZNF792  | -      |
| hsa-miR-656    | ZNF8    | -       | ZNF8   |
| hsa-miR-656    | ZNF800  | ZNF800  | -      |
| hsa-miR-656    | ZNF81   | ZNF81   | -      |
| hsa-miR-656    | ZNF829  | ZNF829  | -      |
| hsa-miR-656    | ZNF84   | ZNF84   | -      |
| hsa-miR-656    | ZNF91   | ZNF91   | -      |
| hsa-miR-656    | ZNRF3   | ZNRF3   | -      |
| hsa-miR-656    | ZPBP2   | ZPBP2   | -      |
| hsa-miR-656    | ZRANB2  | ZRANB2  | -      |
| hsa-miR-656    | ZRANB3  | ZRANB3  | -      |
| hsa-miR-656    | ZSCAN12 | ZSCAN12 | -      |
| hsa-miR-656    | ZSCAN23 | ZSCAN23 | -      |
| hsa-miR-656    | ZSWIM5  | ZSWIM5  | -      |
| hsa-miR-656    | ZSWIM6  | ZSWIM6  | -      |
| hsa-miR-656    | ZZZ3    | ZZZ3    | -      |
| hsa-miR-876-3p | ABCA1   | -       | ABCA1  |
| hsa-miR-876-3p | -       | ACAA2   | ACAA2  |
| hsa-miR-876-3p | -       | ACAD11  | ACAD11 |
| hsa-miR-876-3p | -       | ACBD7   | ACBD7  |
| hsa-miR-876-3p | -       | ACTC1   | ACTC1  |

|                |           |           |          |
|----------------|-----------|-----------|----------|
| hsa-miR-876-3p | -         | ACTN4     | ACTN4    |
| hsa-miR-876-3p | -         | ADRA1A    | ADRA1A   |
| hsa-miR-876-3p | -         | AMD1      | AMD1     |
| hsa-miR-876-3p | -         | ANKIB1    | ANKIB1   |
| hsa-miR-876-3p | -         | ANKRD58   | ANKRD58  |
| hsa-miR-876-3p | ANO6      | ANO6      | -        |
| hsa-miR-876-3p | -         | ARID1A    | ARID1A   |
| hsa-miR-876-3p | -         | ASB12     | ASB12    |
| hsa-miR-876-3p | -         | ATPBD4    | ATPBD4   |
| hsa-miR-876-3p | BAG2      | BAG2      | -        |
| hsa-miR-876-3p | -         | BAI2      | BAI2     |
| hsa-miR-876-3p | BAZ2B     | BAZ2B     | -        |
| hsa-miR-876-3p | -         | BCAS3     | BCAS3    |
| hsa-miR-876-3p | -         | BCL2L14   | BCL2L14  |
| hsa-miR-876-3p | BIRC6     | BIRC6     | -        |
| hsa-miR-876-3p | -         | BLZF1     | BLZF1    |
| hsa-miR-876-3p | BMP2      | BMP2      | -        |
| hsa-miR-876-3p | -         | BMPR1A    | BMPR1A   |
| hsa-miR-876-3p | -         | BRD8      | BRD8     |
| hsa-miR-876-3p | -         | BRP44L    | BRP44L   |
| hsa-miR-876-3p | C10orf26  | C10orf26  | -        |
| hsa-miR-876-3p | -         | C10orf99  | C10orf99 |
| hsa-miR-876-3p | -         | C11orf63  | C11orf63 |
| hsa-miR-876-3p | -         | C12orf24  | C12orf24 |
| hsa-miR-876-3p | C12orf34  | C12orf34  | -        |
| hsa-miR-876-3p | C14orf101 | C14orf101 | -        |
| hsa-miR-876-3p | C15orf29  | C15orf29  | -        |
| hsa-miR-876-3p | -         | C18orf34  | C18orf34 |



|                |         |          |          |
|----------------|---------|----------|----------|
| hsa-miR-876-3p | -       | C20orf24 | C20orf24 |
| hsa-miR-876-3p | -       | C3orf35  | C3orf35  |
| hsa-miR-876-3p | -       | C8orf76  | C8orf76  |
| hsa-miR-876-3p | CACNA1C | CACNA1C  | -        |
| hsa-miR-876-3p | -       | CACNG6   | CACNG6   |
| hsa-miR-876-3p | CALU    | CALU     | -        |
| hsa-miR-876-3p | -       | CCDC111  | CCDC111  |
| hsa-miR-876-3p | -       | CCDC125  | CCDC125  |
| hsa-miR-876-3p | -       | CD164L2  | CD164L2  |
| hsa-miR-876-3p | -       | CDH8     | CDH8     |
| hsa-miR-876-3p | -       | CDK10    | CDK10    |
| hsa-miR-876-3p | -       | CDKN3    | CDKN3    |
| hsa-miR-876-3p | -       | CECR2    | CECR2    |
| hsa-miR-876-3p | CELF1   | CELF1    | -        |
| hsa-miR-876-3p | CELF2   | CELF2    | -        |
| hsa-miR-876-3p | -       | CEP57    | CEP57    |
| hsa-miR-876-3p | -       | CHCHD8   | CHCHD8   |
| hsa-miR-876-3p | -       | CMTM7    | CMTM7    |
| hsa-miR-876-3p | -       | CNTN1    | CNTN1    |
| hsa-miR-876-3p | -       | COL14A1  | COL14A1  |
| hsa-miR-876-3p | -       | COMMD3   | COMMD3   |
| hsa-miR-876-3p | -       | CRB1     | CRB1     |
| hsa-miR-876-3p | -       | CTSF     | CTSF     |
| hsa-miR-876-3p | -       | CWF19L1  | CWF19L1  |
| hsa-miR-876-3p | -       | CYP2C18  | CYP2C18  |
| hsa-miR-876-3p | DCLRE1C | DCLRE1C  | -        |
| hsa-miR-876-3p | -       | DGUOK    | DGUOK    |
| hsa-miR-876-3p | DLG2    | DLG2     | -        |

|                |         |          |          |
|----------------|---------|----------|----------|
| hsa-miR-876-3p | -       | DMKN     | DMKN     |
| hsa-miR-876-3p | -       | DNAI1    | DNAI1    |
| hsa-miR-876-3p | -       | DOK2     | DOK2     |
| hsa-miR-876-3p | -       | DPM1     | DPM1     |
| hsa-miR-876-3p | DTD1    | DTD1     | -        |
| hsa-miR-876-3p | DUSP16  | DUSP16   | -        |
| hsa-miR-876-3p | -       | DYNLT1   | DYNLT1   |
| hsa-miR-876-3p | -       | EGFL8    | EGFL8    |
| hsa-miR-876-3p | -       | EGFR     | EGFR     |
| hsa-miR-876-3p | EGR2    | EGR2     | -        |
| hsa-miR-876-3p | ELAVL2  | ELAVL2   | -        |
| hsa-miR-876-3p | -       | ELOVL7   | ELOVL7   |
| hsa-miR-876-3p | -       | ELSPBP1  | ELSPBP1  |
| hsa-miR-876-3p | EPB41L2 | EPB41L2  | -        |
| hsa-miR-876-3p | -       | EPS8L3   | EPS8L3   |
| hsa-miR-876-3p | ERC2    | ERC2     | -        |
| hsa-miR-876-3p | -       | ETV5     | ETV5     |
| hsa-miR-876-3p | FAM123A | -        | FAM123A  |
| hsa-miR-876-3p | FAM46A  | FAM46A   | -        |
| hsa-miR-876-3p | -       | FAM63B   | FAM63B   |
| hsa-miR-876-3p | -       | FAM89A   | FAM89A   |
| hsa-miR-876-3p | FCHO2   | FCHO2    | -        |
| hsa-miR-876-3p | -       | FCN3     | FCN3     |
| hsa-miR-876-3p | -       | FGFR1OP2 | FGFR1OP2 |
| hsa-miR-876-3p | -       | FHAD1    | FHAD1    |
| hsa-miR-876-3p | -       | FHL3     | FHL3     |
| hsa-miR-876-3p | FKBP5   | FKBP5    | -        |
| hsa-miR-876-3p | FNDC5   | FNDC5    | -        |

|                |         |          |          |
|----------------|---------|----------|----------|
| hsa-miR-876-3p | -       | FOXA3    | FOXA3    |
| hsa-miR-876-3p | -       | FOXD4    | FOXD4    |
| hsa-miR-876-3p | -       | FOXD4L1  | FOXD4L1  |
| hsa-miR-876-3p | FOXP2   | FOXP2    | -        |
| hsa-miR-876-3p | -       | FUT5     | FUT5     |
| hsa-miR-876-3p | -       | FUT7     | FUT7     |
| hsa-miR-876-3p | -       | G0S2     | G0S2     |
| hsa-miR-876-3p | -       | GABARAP  | GABARAP  |
| hsa-miR-876-3p | GALNTL1 | GALNTL1  | -        |
| hsa-miR-876-3p | -       | GATA1    | GATA1    |
| hsa-miR-876-3p | -       | GCH1     | GCH1     |
| hsa-miR-876-3p | -       | GLIPR1L2 | GLIPR1L2 |
| hsa-miR-876-3p | -       | GLOD4    | GLOD4    |
| hsa-miR-876-3p | -       | GNAS     | GNAS     |
| hsa-miR-876-3p | -       | GOLT1A   | GOLT1A   |
| hsa-miR-876-3p | -       | GP9      | GP9      |
| hsa-miR-876-3p | GPD1L   | GPD1L    | -        |
| hsa-miR-876-3p | -       | GPR173   | GPR173   |
| hsa-miR-876-3p | -       | GPRASP2  | GPRASP2  |
| hsa-miR-876-3p | -       | GRIA1    | GRIA1    |
| hsa-miR-876-3p | -       | GSK3B    | GSK3B    |
| hsa-miR-876-3p | HAND2   | HAND2    | -        |
| hsa-miR-876-3p | -       | HCRTR2   | HCRTR2   |
| hsa-miR-876-3p | -       | HEPHL1   | HEPHL1   |
| hsa-miR-876-3p | -       | HEXIM2   | HEXIM2   |
| hsa-miR-876-3p | -       | HIF3A    | HIF3A    |
| hsa-miR-876-3p | HNRNPH3 | HNRNPH3  | -        |
| hsa-miR-876-3p | -       | HRASLS2  | HRASLS2  |

|                |       |          |          |
|----------------|-------|----------|----------|
| hsa-miR-876-3p | -     | IFI44L   | IFI44L   |
| hsa-miR-876-3p | -     | IFNA16   | IFNA16   |
| hsa-miR-876-3p | -     | IFNA17   | IFNA17   |
| hsa-miR-876-3p | -     | IFNA21   | IFNA21   |
| hsa-miR-876-3p | -     | IFNA4    | IFNA4    |
| hsa-miR-876-3p | -     | IFT52    | IFT52    |
| hsa-miR-876-3p | -     | IL15RA   | IL15RA   |
| hsa-miR-876-3p | -     | IL18BP   | IL18BP   |
| hsa-miR-876-3p | -     | IL20     | IL20     |
| hsa-miR-876-3p | -     | ILVBL    | ILVBL    |
| hsa-miR-876-3p | -     | INPP5B   | INPP5B   |
| hsa-miR-876-3p | -     | ITGA4    | ITGA4    |
| hsa-miR-876-3p | -     | ITIH2    | ITIH2    |
| hsa-miR-876-3p | KAT2B | KAT2B    | -        |
| hsa-miR-876-3p | -     | KDELC1   | KDELC1   |
| hsa-miR-876-3p | -     | KIAA1274 | KIAA1274 |
| hsa-miR-876-3p | -     | KIAA1529 | KIAA1529 |
| hsa-miR-876-3p | -     | KIAA1539 | KIAA1539 |
| hsa-miR-876-3p | KIF1B | KIF1B    | -        |
| hsa-miR-876-3p | -     | KIF20A   | KIF20A   |
| hsa-miR-876-3p | -     | KIF9     | KIF9     |
| hsa-miR-876-3p | -     | KIR3DX1  | KIR3DX1  |
| hsa-miR-876-3p | KLHL5 | KLHL5    | -        |
| hsa-miR-876-3p | -     | KLRD1    | KLRD1    |
| hsa-miR-876-3p | -     | KRT20    | KRT20    |
| hsa-miR-876-3p | -     | L3MBTL2  | L3MBTL2  |
| hsa-miR-876-3p | -     | LACE1    | LACE1    |
| hsa-miR-876-3p | -     | LAMP3    | LAMP3    |

|                |         |         |         |
|----------------|---------|---------|---------|
| hsa-miR-876-3p | -       | LARP6   | LARP6   |
| hsa-miR-876-3p | -       | LAYN    | LAYN    |
| hsa-miR-876-3p | -       | LOXL3   | LOXL3   |
| hsa-miR-876-3p | LPHN2   | LPHN2   | -       |
| hsa-miR-876-3p | LRP4    | LRP4    | -       |
| hsa-miR-876-3p | -       | LRPAP1  | LRPAP1  |
| hsa-miR-876-3p | -       | LRRC41  | LRRC41  |
| hsa-miR-876-3p | -       | LRRFIP2 | LRRFIP2 |
| hsa-miR-876-3p | -       | LRRN3   | LRRN3   |
| hsa-miR-876-3p | -       | LTBP4   | LTBP4   |
| hsa-miR-876-3p | -       | MAF     | MAF     |
| hsa-miR-876-3p | -       | MAGI3   | MAGI3   |
| hsa-miR-876-3p | -       | MARCKS  | MARCKS  |
| hsa-miR-876-3p | MARK1   | MARK1   | -       |
| hsa-miR-876-3p | MARS2   | -       | MARS2   |
| hsa-miR-876-3p | -       | MASP1   | MASP1   |
| hsa-miR-876-3p | -       | MAST4   | MAST4   |
| hsa-miR-876-3p | MED13   | MED13   | -       |
| hsa-miR-876-3p | -       | MFN1    | MFN1    |
| hsa-miR-876-3p | MICAL3  | MICAL3  | -       |
| hsa-miR-876-3p | MIPOL1  | MIPOL1  | -       |
| hsa-miR-876-3p | -       | MKI67IP | MKI67IP |
| hsa-miR-876-3p | MMD     | MMD     | -       |
| hsa-miR-876-3p | MNS1    | -       | MNS1    |
| hsa-miR-876-3p | MOBKL2A | MOBKL2A | -       |
| hsa-miR-876-3p | -       | MOCS3   | MOCS3   |
| hsa-miR-876-3p | -       | MRPL14  | MRPL14  |
| hsa-miR-876-3p | -       | MRPL3   | MRPL3   |

|                |          |          |          |
|----------------|----------|----------|----------|
| hsa-miR-876-3p | -        | MTHFS    | MTHFS    |
| hsa-miR-876-3p | -        | MVD      | MVD      |
| hsa-miR-876-3p | -        | MYH11    | MYH11    |
| hsa-miR-876-3p | -        | NAALADL1 | NAALADL1 |
| hsa-miR-876-3p | -        | NAV3     | NAV3     |
| hsa-miR-876-3p | -        | NBPF14   | NBPF14   |
| hsa-miR-876-3p | -        | NBPF16   | NBPF16   |
| hsa-miR-876-3p | -        | NBPF8    | NBPF8    |
| hsa-miR-876-3p | NCKAP1   | NCKAP1   | -        |
| hsa-miR-876-3p | NFE2L2   | NFE2L2   | -        |
| hsa-miR-876-3p | NLK      | NLK      | -        |
| hsa-miR-876-3p | -        | NPL      | NPL      |
| hsa-miR-876-3p | OGT      | OGT      | -        |
| hsa-miR-876-3p | -        | OLFM3    | OLFM3    |
| hsa-miR-876-3p | -        | OXNAD1   | OXNAD1   |
| hsa-miR-876-3p | PAFAH1B2 | PAFAH1B2 | -        |
| hsa-miR-876-3p | -        | PARP1    | PARP1    |
| hsa-miR-876-3p | PAX9     | PAX9     | -        |
| hsa-miR-876-3p | -        | PCDHB3   | PCDHB3   |
| hsa-miR-876-3p | -        | PCDHB5   | PCDHB5   |
| hsa-miR-876-3p | -        | PCYT1B   | PCYT1B   |
| hsa-miR-876-3p | -        | PDSS1    | PDSS1    |
| hsa-miR-876-3p | -        | PDXDC1   | PDXDC1   |
| hsa-miR-876-3p | -        | PIGL     | PIGL     |
| hsa-miR-876-3p | PITX2    | PITX2    | -        |
| hsa-miR-876-3p | -        | PKD2     | PKD2     |
| hsa-miR-876-3p | -        | PLA2G4B  | PLA2G4B  |
| hsa-miR-876-3p | -        | PLCE1    | PLCE1    |

|                |         |         |        |
|----------------|---------|---------|--------|
| hsa-miR-876-3p | PLOD1   | -       | PLOD1  |
| hsa-miR-876-3p | -       | PODN    | PODN   |
| hsa-miR-876-3p | -       | PPIC    | PPIC   |
| hsa-miR-876-3p | PPP1R9A | PPP1R9A | -      |
| hsa-miR-876-3p | -       | PRKCD   | PRKCD  |
| hsa-miR-876-3p | -       | PRKCZ   | PRKCZ  |
| hsa-miR-876-3p | PSEN1   | PSEN1   | -      |
| hsa-miR-876-3p | PSMF1   | PSMF1   | -      |
| hsa-miR-876-3p | PSRC1   | -       | PSRC1  |
| hsa-miR-876-3p | PTP4A3  | -       | PTP4A3 |
| hsa-miR-876-3p | -       | PTPN23  | PTPN23 |
| hsa-miR-876-3p | -       | PURG    | PURG   |
| hsa-miR-876-3p | -       | PUS3    | PUS3   |
| hsa-miR-876-3p | RAB10   | RAB10   | -      |
| hsa-miR-876-3p | -       | RAB27B  | RAB27B |
| hsa-miR-876-3p | -       | RAGE    | RAGE   |
| hsa-miR-876-3p | RALGPS1 | RALGPS1 | -      |
| hsa-miR-876-3p | RALGPS2 | RALGPS2 | -      |
| hsa-miR-876-3p | RAP1B   | RAP1B   | -      |
| hsa-miR-876-3p | -       | RAVER1  | RAVER1 |
| hsa-miR-876-3p | -       | RBBP6   | RBBP6  |
| hsa-miR-876-3p | RBM39   | RBM39   | -      |
| hsa-miR-876-3p | RGMB    | RGMB    | -      |
| hsa-miR-876-3p | RHOA    | RHOA    | -      |
| hsa-miR-876-3p | RIC8B   | RIC8B   | -      |
| hsa-miR-876-3p | -       | RNF20   | RNF20  |
| hsa-miR-876-3p | -       | ROM1    | ROM1   |
| hsa-miR-876-3p | -       | RRAS    | RRAS   |

|                |         |          |          |
|----------------|---------|----------|----------|
| hsa-miR-876-3p | -       | RTN1     | RTN1     |
| hsa-miR-876-3p | SAP30L  | SAP30L   | -        |
| hsa-miR-876-3p | SBDS    | SBDS     | -        |
| hsa-miR-876-3p | -       | SCAND2   | SCAND2   |
| hsa-miR-876-3p | -       | SEC22C   | SEC22C   |
| hsa-miR-876-3p | SEL1L   | SEL1L    | -        |
| hsa-miR-876-3p | -       | SETBP1   | SETBP1   |
| hsa-miR-876-3p | -       | SFRS5    | SFRS5    |
| hsa-miR-876-3p | -       | SH3BGR   | SH3BGR   |
| hsa-miR-876-3p | SIAH1   | SIAH1    | -        |
| hsa-miR-876-3p | -       | SIX3     | SIX3     |
| hsa-miR-876-3p | -       | SLAIN1   | SLAIN1   |
| hsa-miR-876-3p | -       | SLC12A1  | SLC12A1  |
| hsa-miR-876-3p | -       | SLC13A4  | SLC13A4  |
| hsa-miR-876-3p | -       | SLC14A1  | SLC14A1  |
| hsa-miR-876-3p | -       | SLC25A23 | SLC25A23 |
| hsa-miR-876-3p | -       | SLC25A4  | SLC25A4  |
| hsa-miR-876-3p | SLC39A9 | SLC39A9  | -        |
| hsa-miR-876-3p | -       | SLC44A1  | SLC44A1  |
| hsa-miR-876-3p | -       | SLC6A4   | SLC6A4   |
| hsa-miR-876-3p | -       | SLMO2    | SLMO2    |
| hsa-miR-876-3p | -       | SMTN     | SMTN     |
| hsa-miR-876-3p | SMURF1  | SMURF1   | -        |
| hsa-miR-876-3p | SNX16   | SNX16    | -        |
| hsa-miR-876-3p | -       | SNX25    | SNX25    |
| hsa-miR-876-3p | SNX27   | SNX27    | -        |
| hsa-miR-876-3p | -       | SOD2     | SOD2     |
| hsa-miR-876-3p | -       | SOHLH2   | SOHLH2   |



|                |                |                |         |
|----------------|----------------|----------------|---------|
| hsa-miR-876-3p | -              | SORBS2         | SORBS2  |
| hsa-miR-876-3p | -              | SPCS1          | SPCS1   |
| hsa-miR-876-3p | -              | SPRR3          | SPRR3   |
| hsa-miR-876-3p | -              | SRP14          | SRP14   |
| hsa-miR-876-3p | ST3GAL1        | -              | ST3GAL1 |
| hsa-miR-876-3p | -              | SUPT3H         | SUPT3H  |
| hsa-miR-876-3p | -              | SYT6           | SYT6    |
| hsa-miR-876-3p | -              | TFR2           | TFR2    |
| hsa-miR-876-3p | TMEM123        | TMEM123        | -       |
| hsa-miR-876-3p | -              | TMEM143        | TMEM143 |
| hsa-miR-876-3p | -              | TMEM177        | TMEM177 |
| hsa-miR-876-3p | TMEM189-UBE2V1 | TMEM189-UBE2V1 | -       |
| hsa-miR-876-3p | -              | TMEM61         | TMEM61  |
| hsa-miR-876-3p | -              | TMEM67         | TMEM67  |
| hsa-miR-876-3p | TNN            | TNN            | -       |
| hsa-miR-876-3p | -              | TNS4           | TNS4    |
| hsa-miR-876-3p | -              | TP53           | TP53    |
| hsa-miR-876-3p | TPCN1          | TPCN1          | -       |
| hsa-miR-876-3p | -              | TPI1           | TPI1    |
| hsa-miR-876-3p | TRAK1          | TRAK1          | -       |
| hsa-miR-876-3p | -              | TRIM21         | TRIM21  |
| hsa-miR-876-3p | -              | TRIM31         | TRIM31  |
| hsa-miR-876-3p | TSC22D2        | TSC22D2        | -       |
| hsa-miR-876-3p | TSPAN12        | TSPAN12        | -       |
| hsa-miR-876-3p | TSSK2          | TSSK2          | -       |
| hsa-miR-876-3p | -              | TTC12          | TTC12   |
| hsa-miR-876-3p | TTK            | TTK            | -       |
| hsa-miR-876-3p | TTYH2          | TTYH2          | -       |

|                |         |         |         |
|----------------|---------|---------|---------|
| hsa-miR-876-3p | -       | TYRP1   | TYRP1   |
| hsa-miR-876-3p | -       | UBAP2L  | UBAP2L  |
| hsa-miR-876-3p | -       | UBE2U   | UBE2U   |
| hsa-miR-876-3p | UBE2V1  | UBE2V1  | -       |
| hsa-miR-876-3p | -       | UBQLNL  | UBQLNL  |
| hsa-miR-876-3p | UBR5    | UBR5    | -       |
| hsa-miR-876-3p | -       | UEVLD   | UEVLD   |
| hsa-miR-876-3p | -       | UHRF2   | UHRF2   |
| hsa-miR-876-3p | VCPIP1  | VCPIP1  | -       |
| hsa-miR-876-3p | -       | VTI1A   | VTI1A   |
| hsa-miR-876-3p | WASF1   | WASF1   | -       |
| hsa-miR-876-3p | WDFY3   | WDFY3   | -       |
| hsa-miR-876-3p | -       | WDR59   | WDR59   |
| hsa-miR-876-3p | -       | WDR64   | WDR64   |
| hsa-miR-876-3p | -       | WNK2    | WNK2    |
| hsa-miR-876-3p | WNK4    | -       | WNK4    |
| hsa-miR-876-3p | -       | XK      | XK      |
| hsa-miR-876-3p | ZC3HAV1 | ZC3HAV1 | -       |
| hsa-miR-876-3p | -       | ZDHHC5  | ZDHHC5  |
| hsa-miR-876-3p | -       | ZMAT4   | ZMAT4   |
| hsa-miR-876-3p | -       | ZNF365  | ZNF365  |
| hsa-miR-876-3p | -       | ZNF410  | ZNF410  |
| hsa-miR-876-3p | -       | ZNF530  | ZNF530  |
| hsa-miR-876-3p | -       | ZNF75A  | ZNF75A  |
| hsa-miR-876-3p | -       | ZNF808  | ZNF808  |
| hsa-miR-876-3p | ZYG11B  | ZYG11B  | -       |
| hsa-miR-132    | ACVR1   | ACVR1   | ACVR1   |
| hsa-miR-132    | ADAMTS6 | ADAMTS6 | ADAMTS6 |
| hsa-miR-132    | AMOT    | AMOT    | AMOT    |

|             |          |          |          |
|-------------|----------|----------|----------|
| hsa-miR-132 | ANKRD29  | ANKRD29  | ANKRD29  |
| hsa-miR-132 | ANP32A   | ANP32A   | ANP32A   |
| hsa-miR-132 | ARX      | ARX      | ARX      |
| hsa-miR-132 | BCAN     | BCAN     | BCAN     |
| hsa-miR-132 | BNC2     | BNC2     | BNC2     |
| hsa-miR-132 | BTG2     | BTG2     | BTG2     |
| hsa-miR-132 | C19orf47 | C19orf47 | C19orf47 |
| hsa-miR-132 | CAMTA1   | CAMTA1   | CAMTA1   |
| hsa-miR-132 | CBLL1    | CBLL1    | CBLL1    |
| hsa-miR-132 | CC2D1B   | CC2D1B   | CC2D1B   |
| hsa-miR-132 | CRK      | CRK      | CRK      |
| hsa-miR-132 | CXorf36  | CXorf36  | CXorf36  |
| hsa-miR-132 | DYNLL2   | DYNLL2   | DYNLL2   |
| hsa-miR-132 | E2F5     | E2F5     | E2F5     |
| hsa-miR-132 | EIF2S3   | EIF2S3   | EIF2S3   |
| hsa-miR-132 | EIF4A2   | EIF4A2   | EIF4A2   |
| hsa-miR-132 | EPB41    | EPB41    | EPB41    |
| hsa-miR-132 | FKBP2    | FKBP2    | FKBP2    |
| hsa-miR-132 | FOXA1    | FOXA1    | FOXA1    |
| hsa-miR-132 | FOXP2    | FOXP2    | FOXP2    |
| hsa-miR-132 | FXR1     | FXR1     | FXR1     |
| hsa-miR-132 | GAPVD1   | GAPVD1   | GAPVD1   |
| hsa-miR-132 | GDF5     | GDF5     | GDF5     |
| hsa-miR-132 | GMFB     | GMFB     | GMFB     |
| hsa-miR-132 | GRM3     | GRM3     | GRM3     |
| hsa-miR-132 | GTDC1    | GTDC1    | GTDC1    |
| hsa-miR-132 | GTF2H1   | GTF2H1   | GTF2H1   |
| hsa-miR-132 | H2AFZ    | H2AFZ    | H2AFZ    |
| hsa-miR-132 | HBEGF    | HBEGF    | HBEGF    |
| hsa-miR-132 | HHIP     | HHIP     | HHIP     |
| hsa-miR-132 | HSD11B1  | HSD11B1  | HSD11B1  |
| hsa-miR-132 | INTS6    | INTS6    | INTS6    |
| hsa-miR-132 | KCNJ12   | KCNJ12   | KCNJ12   |
| hsa-miR-132 | LEMD3    | LEMD3    | LEMD3    |
| hsa-miR-132 | LRRFIP1  | LRRFIP1  | LRRFIP1  |
| hsa-miR-132 | MAPK3    | MAPK3    | MAPK3    |
| hsa-miR-132 | MIA3     | MIA3     | MIA3     |
| hsa-miR-132 | MYCBP2   | MYCBP2   | MYCBP2   |
| hsa-miR-132 | NR4A2    | NR4A2    | NR4A2    |
| hsa-miR-132 | NTNG1    | NTNG1    | NTNG1    |
| hsa-miR-132 | OLFM1    | OLFM1    | OLFM1    |
| hsa-miR-132 | PAIP2    | PAIP2    | PAIP2    |
| hsa-miR-132 | PEA15    | PEA15    | PEA15    |
| hsa-miR-132 | POM121   | POM121   | POM121   |
| hsa-miR-132 | PPP2CB   | PPP2CB   | PPP2CB   |
| hsa-miR-132 | RASA1    | RASA1    | RASA1    |
| hsa-miR-132 | RPL13A   | RPL13A   | RPL13A   |
| hsa-miR-132 | RPP14    | RPP14    | RPP14    |
| hsa-miR-132 | SAP30L   | SAP30L   | SAP30L   |
| hsa-miR-132 | SCN2A    | SCN2A    | SCN2A    |
| hsa-miR-132 | SCN3A    | SCN3A    | SCN3A    |

|              |          |          |          |
|--------------|----------|----------|----------|
| hsa-miR-132  | SIRT1    | SIRT1    | SIRT1    |
| hsa-miR-132  | SLAIN2   | SLAIN2   | SLAIN2   |
| hsa-miR-132  | SLC23A2  | SLC23A2  | SLC23A2  |
| hsa-miR-132  | SLC25A28 | SLC25A28 | SLC25A28 |
| hsa-miR-132  | SLC2A1   | SLC2A1   | SLC2A1   |
| hsa-miR-132  | SPAST    | SPAST    | SPAST    |
| hsa-miR-132  | SPRY1    | SPRY1    | SPRY1    |
| hsa-miR-132  | SSH2     | SSH2     | SSH2     |
| hsa-miR-132  | TCF15    | TCF15    | TCF15    |
| hsa-miR-132  | TCF7L1   | TCF7L1   | TCF7L1   |
| hsa-miR-132  | TIMM9    | TIMM9    | TIMM9    |
| hsa-miR-132  | TJAP1    | TJAP1    | TJAP1    |
| hsa-miR-132  | TLN2     | TLN2     | TLN2     |
| hsa-miR-132  | TMEM51   | TMEM51   | TMEM51   |
| hsa-miR-132  | TTK      | TTK      | TTK      |
| hsa-miR-132  | TUSC2    | TUSC2    | TUSC2    |
| hsa-miR-132  | USP38    | USP38    | USP38    |
| hsa-miR-132  | USP9X    | USP9X    | USP9X    |
| hsa-miR-132  | ZCCHC11  | ZCCHC11  | ZCCHC11  |
| hsa-miR-132  | ZNF238   | ZNF238   | ZNF238   |
| hsa-miR-132  | ZNF362   | ZNF362   | ZNF362   |
| hsa-miR-132  | ZNF516   | ZNF516   | ZNF516   |
| hsa-miR-132  | ZNF644   | ZNF644   | ZNF644   |
| hsa-miR-134  | ACCN2    | ACCN2    | ACCN2    |
| hsa-miR-134  | ANGPTL4  | ANGPTL4  | ANGPTL4  |
| hsa-miR-134  | ARL4D    | ARL4D    | ARL4D    |
| hsa-miR-134  | CHIC1    | CHIC1    | CHIC1    |
| hsa-miR-134  | GGCX     | GGCX     | GGCX     |
| hsa-miR-134  | GNAO1    | GNAO1    | GNAO1    |
| hsa-miR-134  | GRIK2    | GRIK2    | GRIK2    |
| hsa-miR-134  | LSM12    | LSM12    | LSM12    |
| hsa-miR-134  | MBTD1    | MBTD1    | MBTD1    |
| hsa-miR-134  | PATZ1    | PATZ1    | PATZ1    |
| hsa-miR-134  | PDCD7    | PDCD7    | PDCD7    |
| hsa-miR-134  | PPP1R7   | PPP1R7   | PPP1R7   |
| hsa-miR-134  | SLC25A5  | SLC25A5  | SLC25A5  |
| hsa-miR-134  | SMAD6    | SMAD6    | SMAD6    |
| hsa-miR-134  | VDAC2    | VDAC2    | VDAC2    |
| hsa-miR-134  | ZMAT5    | ZMAT5    | ZMAT5    |
| hsa-miR-146a | BIVM     | BIVM     | BIVM     |
| hsa-miR-146a | C6orf203 | C6orf203 | C6orf203 |
| hsa-miR-146a | CASK     | CASK     | CASK     |
| hsa-miR-146a | CCBP2    | CCBP2    | CCBP2    |
| hsa-miR-146a | CDS1     | CDS1     | CDS1     |
| hsa-miR-146a | DDHD1    | DDHD1    | DDHD1    |
| hsa-miR-146a | DNPEP    | DNPEP    | DNPEP    |
| hsa-miR-146a | IGSF1    | IGSF1    | IGSF1    |
| hsa-miR-146a | IRAK1    | IRAK1    | IRAK1    |
| hsa-miR-146a | KLF7     | KLF7     | KLF7     |
| hsa-miR-146a | PPP1R11  | PPP1R11  | PPP1R11  |
| hsa-miR-146a | SLC10A3  | SLC10A3  | SLC10A3  |

|              |           |           |           |
|--------------|-----------|-----------|-----------|
| hsa-miR-146a | SNX21     | SNX21     | SNX21     |
| hsa-miR-146a | SRP14     | SRP14     | SRP14     |
| hsa-miR-146a | STRBP     | STRBP     | STRBP     |
| hsa-miR-146a | TANC2     | TANC2     | TANC2     |
| hsa-miR-146a | TDRKH     | TDRKH     | TDRKH     |
| hsa-miR-146a | TRAF6     | TRAF6     | TRAF6     |
| hsa-miR-146a | TRDMT1    | TRDMT1    | TRDMT1    |
| hsa-miR-146a | UHRF1     | UHRF1     | UHRF1     |
| hsa-miR-146a | VASN      | VASN      | VASN      |
| hsa-miR-146a | VBP1      | VBP1      | VBP1      |
| hsa-miR-146a | YLPM1     | YLPM1     | YLPM1     |
| hsa-miR-146a | ZBTB2     | ZBTB2     | ZBTB2     |
| hsa-miR-146a | ZNF367    | ZNF367    | ZNF367    |
| hsa-miR-154  | ABCC9     | ABCC9     | ABCC9     |
| hsa-miR-154  | ATG7      | ATG7      | ATG7      |
| hsa-miR-154  | CIC       | CIC       | CIC       |
| hsa-miR-154  | COPS2     | COPS2     | COPS2     |
| hsa-miR-154  | CUL2      | CUL2      | CUL2      |
| hsa-miR-154  | TMEM108   | TMEM108   | TMEM108   |
| hsa-miR-154  | TNFAIP3   | TNFAIP3   | TNFAIP3   |
| hsa-miR-181d | ADM       | ADM       | ADM       |
| hsa-miR-181d | APOO      | APOO      | APOO      |
| hsa-miR-181d | ARHGEF3   | ARHGEF3   | ARHGEF3   |
| hsa-miR-181d | ARSJ      | ARSJ      | ARSJ      |
| hsa-miR-181d | BAI3      | BAI3      | BAI3      |
| hsa-miR-181d | BRAP      | BRAP      | BRAP      |
| hsa-miR-181d | C11orf75  | C11orf75  | C11orf75  |
| hsa-miR-181d | C14orf129 | C14orf129 | C14orf129 |
| hsa-miR-181d | C6orf192  | C6orf192  | C6orf192  |
| hsa-miR-181d | CAPRIN2   | CAPRIN2   | CAPRIN2   |
| hsa-miR-181d | CARD11    | CARD11    | CARD11    |
| hsa-miR-181d | CCDC17    | CCDC17    | CCDC17    |
| hsa-miR-181d | CCDC92    | CCDC92    | CCDC92    |
| hsa-miR-181d | CCL8      | CCL8      | CCL8      |
| hsa-miR-181d | CD163     | CD163     | CD163     |
| hsa-miR-181d | CD4       | CD4       | CD4       |
| hsa-miR-181d | CLCC1     | CLCC1     | CLCC1     |
| hsa-miR-181d | COPS2     | COPS2     | COPS2     |
| hsa-miR-181d | CPNE2     | CPNE2     | CPNE2     |
| hsa-miR-181d | CYLD      | CYLD      | CYLD      |
| hsa-miR-181d | DAZAP2    | DAZAP2    | DAZAP2    |
| hsa-miR-181d | DDIT4     | DDIT4     | DDIT4     |
| hsa-miR-181d | DHX57     | DHX57     | DHX57     |
| hsa-miR-181d | DIP2C     | DIP2C     | DIP2C     |
| hsa-miR-181d | DMXL2     | DMXL2     | DMXL2     |
| hsa-miR-181d | DNAJC13   | DNAJC13   | DNAJC13   |
| hsa-miR-181d | DOCK7     | DOCK7     | DOCK7     |
| hsa-miR-181d | E2F5      | E2F5      | E2F5      |
| hsa-miR-181d | ENTPD6    | ENTPD6    | ENTPD6    |
| hsa-miR-181d | EPB41L3   | EPB41L3   | EPB41L3   |
| hsa-miR-181d | EXOSC3    | EXOSC3    | EXOSC3    |

|              |          |          |          |
|--------------|----------|----------|----------|
| hsa-miR-181d | FBXO33   | FBXO33   | FBXO33   |
| hsa-miR-181d | FBXO34   | FBXO34   | FBXO34   |
| hsa-miR-181d | FOXP1    | FOXP1    | FOXP1    |
| hsa-miR-181d | GATA6    | GATA6    | GATA6    |
| hsa-miR-181d | GDI1     | GDI1     | GDI1     |
| hsa-miR-181d | GPBP1    | GPBP1    | GPBP1    |
| hsa-miR-181d | GPSM1    | GPSM1    | GPSM1    |
| hsa-miR-181d | GRIA2    | GRIA2    | GRIA2    |
| hsa-miR-181d | GRM1     | GRM1     | GRM1     |
| hsa-miR-181d | HEMGN    | HEMGN    | HEMGN    |
| hsa-miR-181d | HMBS     | HMBS     | HMBS     |
| hsa-miR-181d | HMGB2    | HMGB2    | HMGB2    |
| hsa-miR-181d | HS2ST1   | HS2ST1   | HS2ST1   |
| hsa-miR-181d | HS3ST3A1 | HS3ST3A1 | HS3ST3A1 |
| hsa-miR-181d | HSP90B1  | HSP90B1  | HSP90B1  |
| hsa-miR-181d | IL2      | IL2      | IL2      |
| hsa-miR-181d | ING5     | ING5     | ING5     |
| hsa-miR-181d | IPPK     | IPPK     | IPPK     |
| hsa-miR-181d | ITGB8    | ITGB8    | ITGB8    |
| hsa-miR-181d | KCNMA1   | KCNMA1   | KCNMA1   |
| hsa-miR-181d | KIAA0195 | KIAA0195 | KIAA0195 |
| hsa-miR-181d | KIAA0528 | KIAA0528 | KIAA0528 |
| hsa-miR-181d | KLF6     | KLF6     | KLF6     |
| hsa-miR-181d | KLHL2    | KLHL2    | KLHL2    |
| hsa-miR-181d | KLHL5    | KLHL5    | KLHL5    |
| hsa-miR-181d | KPNA1    | KPNA1    | KPNA1    |
| hsa-miR-181d | KPNA4    | KPNA4    | KPNA4    |
| hsa-miR-181d | LEMD3    | LEMD3    | LEMD3    |
| hsa-miR-181d | LMBRD2   | LMBRD2   | LMBRD2   |
| hsa-miR-181d | LMO1     | LMO1     | LMO1     |
| hsa-miR-181d | LRBA     | LRBA     | LRBA     |
| hsa-miR-181d | LRRC8D   | LRRC8D   | LRRC8D   |
| hsa-miR-181d | LRRK2    | LRRK2    | LRRK2    |
| hsa-miR-181d | LRRN1    | LRRN1    | LRRN1    |
| hsa-miR-181d | MAB21L2  | MAB21L2  | MAB21L2  |
| hsa-miR-181d | MAMDC2   | MAMDC2   | MAMDC2   |
| hsa-miR-181d | MARK1    | MARK1    | MARK1    |
| hsa-miR-181d | MLF1     | MLF1     | MLF1     |
| hsa-miR-181d | MPP7     | MPP7     | MPP7     |
| hsa-miR-181d | NIPBL    | NIPBL    | NIPBL    |
| hsa-miR-181d | NOL8     | NOL8     | NOL8     |
| hsa-miR-181d | NPEPPS   | NPEPPS   | NPEPPS   |
| hsa-miR-181d | NR6A1    | NR6A1    | NR6A1    |
| hsa-miR-181d | NUDT21   | NUDT21   | NUDT21   |
| hsa-miR-181d | PACS2    | PACS2    | PACS2    |
| hsa-miR-181d | PAK4     | PAK4     | PAK4     |
| hsa-miR-181d | PCDHA1   | PCDHA1   | PCDHA1   |
| hsa-miR-181d | PCGF2    | PCGF2    | PCGF2    |
| hsa-miR-181d | PIAS3    | PIAS3    | PIAS3    |
| hsa-miR-181d | PKNOX2   | PKNOX2   | PKNOX2   |
| hsa-miR-181d | PLAU     | PLAU     | PLAU     |

|              |           |           |           |
|--------------|-----------|-----------|-----------|
| hsa-miR-181d | PLCL2     | PLCL2     | PLCL2     |
| hsa-miR-181d | PLEKHJ1   | PLEKHJ1   | PLEKHJ1   |
| hsa-miR-181d | POLQ      | POLQ      | POLQ      |
| hsa-miR-181d | PRKAG2    | PRKAG2    | PRKAG2    |
| hsa-miR-181d | PRKG1     | PRKG1     | PRKG1     |
| hsa-miR-181d | PRLR      | PRLR      | PRLR      |
| hsa-miR-181d | PROX1     | PROX1     | PROX1     |
| hsa-miR-181d | RAD21     | RAD21     | RAD21     |
| hsa-miR-181d | RASSF2    | RASSF2    | RASSF2    |
| hsa-miR-181d | RBAK      | RBAK      | RBAK      |
| hsa-miR-181d | RBM26     | RBM26     | RBM26     |
| hsa-miR-181d | RNF145    | RNF145    | RNF145    |
| hsa-miR-181d | RNF34     | RNF34     | RNF34     |
| hsa-miR-181d | SACM1L    | SACM1L    | SACM1L    |
| hsa-miR-181d | SEC24C    | SEC24C    | SEC24C    |
| hsa-miR-181d | SEMA3B    | SEMA3B    | SEMA3B    |
| hsa-miR-181d | SEMA3C    | SEMA3C    | SEMA3C    |
| hsa-miR-181d | SEMA4C    | SEMA4C    | SEMA4C    |
| hsa-miR-181d | SEMA4G    | SEMA4G    | SEMA4G    |
| hsa-miR-181d | SENP1     | SENP1     | SENP1     |
| hsa-miR-181d | SERPINE1  | SERPINE1  | SERPINE1  |
| hsa-miR-181d | SETX      | SETX      | SETX      |
| hsa-miR-181d | SHE       | SHE       | SHE       |
| hsa-miR-181d | SIPA1L2   | SIPA1L2   | SIPA1L2   |
| hsa-miR-181d | SLC25A37  | SLC25A37  | SLC25A37  |
| hsa-miR-181d | SLC25A4   | SLC25A4   | SLC25A4   |
| hsa-miR-181d | SLC35E1   | SLC35E1   | SLC35E1   |
| hsa-miR-181d | SOS1      | SOS1      | SOS1      |
| hsa-miR-181d | SPP1      | SPP1      | SPP1      |
| hsa-miR-181d | STC1      | STC1      | STC1      |
| hsa-miR-181d | SYNPR     | SYNPR     | SYNPR     |
| hsa-miR-181d | TBC1D4    | TBC1D4    | TBC1D4    |
| hsa-miR-181d | TBL1XR1   | TBL1XR1   | TBL1XR1   |
| hsa-miR-181d | TBPL1     | TBPL1     | TBPL1     |
| hsa-miR-181d | TGFBRAP1  | TGFBRAP1  | TGFBRAP1  |
| hsa-miR-181d | THBS4     | THBS4     | THBS4     |
| hsa-miR-181d | TMEM131   | TMEM131   | TMEM131   |
| hsa-miR-181d | TMEM165   | TMEM165   | TMEM165   |
| hsa-miR-181d | TMF1      | TMF1      | TMF1      |
| hsa-miR-181d | TNFRSF11B | TNFRSF11B | TNFRSF11B |
| hsa-miR-181d | TSGA10    | TSGA10    | TSGA10    |
| hsa-miR-181d | TUSC3     | TUSC3     | TUSC3     |
| hsa-miR-181d | WDR20     | WDR20     | WDR20     |
| hsa-miR-181d | ZDHHC3    | ZDHHC3    | ZDHHC3    |
| hsa-miR-181d | ZDHHC7    | ZDHHC7    | ZDHHC7    |
| hsa-miR-181d | ZFAND6    | ZFAND6    | ZFAND6    |
| hsa-miR-181d | ZIC2      | ZIC2      | ZIC2      |
| hsa-miR-181d | ZNF439    | ZNF439    | ZNF439    |
| hsa-miR-181d | ZNF468    | ZNF468    | ZNF468    |
| hsa-miR-181d | ZNF562    | ZNF562    | ZNF562    |
| hsa-miR-181d | ZNF594    | ZNF594    | ZNF594    |

|              |          |          |          |
|--------------|----------|----------|----------|
| hsa-miR-181d | ZNF673   | ZNF673   | ZNF673   |
| hsa-miR-181d | ZNF699   | ZNF699   | ZNF699   |
| hsa-miR-181d | ZNF781   | ZNF781   | ZNF781   |
| hsa-miR-181d | ZNF83    | ZNF83    | ZNF83    |
| hsa-miR-181d | ZSWIM1   | ZSWIM1   | ZSWIM1   |
| hsa-miR-181d | ZZZ3     | ZZZ3     | ZZZ3     |
| hsa-miR-18a  | ABTB2    | ABTB2    | ABTB2    |
| hsa-miR-18a  | ATP13A1  | ATP13A1  | ATP13A1  |
| hsa-miR-18a  | BTG3     | BTG3     | BTG3     |
| hsa-miR-18a  | C22orf31 | C22orf31 | C22orf31 |
| hsa-miR-18a  | C7orf42  | C7orf42  | C7orf42  |
| hsa-miR-18a  | CDK2     | CDK2     | CDK2     |
| hsa-miR-18a  | CLIP3    | CLIP3    | CLIP3    |
| hsa-miR-18a  | ELOVL1   | ELOVL1   | ELOVL1   |
| hsa-miR-18a  | ESR1     | ESR1     | ESR1     |
| hsa-miR-18a  | F3       | F3       | F3       |
| hsa-miR-18a  | FOXH1    | FOXH1    | FOXH1    |
| hsa-miR-18a  | FRS2     | FRS2     | FRS2     |
| hsa-miR-18a  | GNPDA2   | GNPDA2   | GNPDA2   |
| hsa-miR-18a  | HEATR5A  | HEATR5A  | HEATR5A  |
| hsa-miR-18a  | HIF1A    | HIF1A    | HIF1A    |
| hsa-miR-18a  | HSF2     | HSF2     | HSF2     |
| hsa-miR-18a  | IRF2     | IRF2     | IRF2     |
| hsa-miR-18a  | KCMF1    | KCMF1    | KCMF1    |
| hsa-miR-18a  | KCNH7    | KCNH7    | KCNH7    |
| hsa-miR-18a  | LSM14B   | LSM14B   | LSM14B   |
| hsa-miR-18a  | MAP7D1   | MAP7D1   | MAP7D1   |
| hsa-miR-18a  | MDGA1    | MDGA1    | MDGA1    |
| hsa-miR-18a  | MYLK     | MYLK     | MYLK     |
| hsa-miR-18a  | NR1H2    | NR1H2    | NR1H2    |
| hsa-miR-18a  | NXT2     | NXT2     | NXT2     |
| hsa-miR-18a  | PDE4D    | PDE4D    | PDE4D    |
| hsa-miR-18a  | PTP4A3   | PTP4A3   | PTP4A3   |
| hsa-miR-18a  | SEC14L3  | SEC14L3  | SEC14L3  |
| hsa-miR-18a  | TBPL1    | TBPL1    | TBPL1    |
| hsa-miR-18a  | TNFAIP3  | TNFAIP3  | TNFAIP3  |
| hsa-miR-18a  | TPM3     | TPM3     | TPM3     |
| hsa-miR-18a  | UBE2Z    | UBE2Z    | UBE2Z    |
| hsa-miR-18a  | UBTD2    | UBTD2    | UBTD2    |
| hsa-miR-18a  | ZCCHC4   | ZCCHC4   | ZCCHC4   |
| hsa-miR-18b  | ABTB2    | ABTB2    | ABTB2    |
| hsa-miR-18b  | AEBP2    | AEBP2    | AEBP2    |
| hsa-miR-18b  | ATP13A1  | ATP13A1  | ATP13A1  |
| hsa-miR-18b  | ATXN7L1  | ATXN7L1  | ATXN7L1  |
| hsa-miR-18b  | BTG3     | BTG3     | BTG3     |
| hsa-miR-18b  | C22orf31 | C22orf31 | C22orf31 |
| hsa-miR-18b  | C7orf42  | C7orf42  | C7orf42  |
| hsa-miR-18b  | CDK2     | CDK2     | CDK2     |
| hsa-miR-18b  | CLIP3    | CLIP3    | CLIP3    |
| hsa-miR-18b  | ELOVL1   | ELOVL1   | ELOVL1   |
| hsa-miR-18b  | FBXL3    | FBXL3    | FBXL3    |



|             |           |           |           |
|-------------|-----------|-----------|-----------|
| hsa-miR-18b | FRS2      | FRS2      | FRS2      |
| hsa-miR-18b | GNPDA2    | GNPDA2    | GNPDA2    |
| hsa-miR-18b | HEATR5A   | HEATR5A   | HEATR5A   |
| hsa-miR-18b | HMBOX1    | HMBOX1    | HMBOX1    |
| hsa-miR-18b | HSF2      | HSF2      | HSF2      |
| hsa-miR-18b | KCNH7     | KCNH7     | KCNH7     |
| hsa-miR-18b | LMO4      | LMO4      | LMO4      |
| hsa-miR-18b | LRRFIP1   | LRRFIP1   | LRRFIP1   |
| hsa-miR-18b | LSM14B    | LSM14B    | LSM14B    |
| hsa-miR-18b | MAP7D1    | MAP7D1    | MAP7D1    |
| hsa-miR-18b | MDGA1     | MDGA1     | MDGA1     |
| hsa-miR-18b | MYLK      | MYLK      | MYLK      |
| hsa-miR-18b | NR1H2     | NR1H2     | NR1H2     |
| hsa-miR-18b | PTP4A3    | PTP4A3    | PTP4A3    |
| hsa-miR-18b | SH3BP4    | SH3BP4    | SH3BP4    |
| hsa-miR-18b | SIM2      | SIM2      | SIM2      |
| hsa-miR-18b | TBPL1     | TBPL1     | TBPL1     |
| hsa-miR-18b | THBD      | THBD      | THBD      |
| hsa-miR-18b | TPM3      | TPM3      | TPM3      |
| hsa-miR-18b | UBE2Z     | UBE2Z     | UBE2Z     |
| hsa-miR-18b | UBTD2     | UBTD2     | UBTD2     |
| hsa-miR-18b | ZCCHC4    | ZCCHC4    | ZCCHC4    |
| hsa-miR-19a | ABHD5     | ABHD5     | ABHD5     |
| hsa-miR-19a | ACBD5     | ACBD5     | ACBD5     |
| hsa-miR-19a | ACSL3     | ACSL3     | ACSL3     |
| hsa-miR-19a | ACTN1     | ACTN1     | ACTN1     |
| hsa-miR-19a | ADSS      | ADSS      | ADSS      |
| hsa-miR-19a | AFTPH     | AFTPH     | AFTPH     |
| hsa-miR-19a | ALPK2     | ALPK2     | ALPK2     |
| hsa-miR-19a | ANXA7     | ANXA7     | ANXA7     |
| hsa-miR-19a | ARFGEF1   | ARFGEF1   | ARFGEF1   |
| hsa-miR-19a | ARMC8     | ARMC8     | ARMC8     |
| hsa-miR-19a | ASB7      | ASB7      | ASB7      |
| hsa-miR-19a | ASNA1     | ASNA1     | ASNA1     |
| hsa-miR-19a | ATG4D     | ATG4D     | ATG4D     |
| hsa-miR-19a | ATP10A    | ATP10A    | ATP10A    |
| hsa-miR-19a | ATP2B2    | ATP2B2    | ATP2B2    |
| hsa-miR-19a | B3GALNT2  | B3GALNT2  | B3GALNT2  |
| hsa-miR-19a | BAMBI     | BAMBI     | BAMBI     |
| hsa-miR-19a | BCL3      | BCL3      | BCL3      |
| hsa-miR-19a | BCL7A     | BCL7A     | BCL7A     |
| hsa-miR-19a | BTG1      | BTG1      | BTG1      |
| hsa-miR-19a | C14orf129 | C14orf129 | C14orf129 |
| hsa-miR-19a | C15orf24  | C15orf24  | C15orf24  |
| hsa-miR-19a | C22orf31  | C22orf31  | C22orf31  |
| hsa-miR-19a | C2orf42   | C2orf42   | C2orf42   |
| hsa-miR-19a | C5orf32   | C5orf32   | C5orf32   |
| hsa-miR-19a | CAB39L    | CAB39L    | CAB39L    |
| hsa-miR-19a | CADM4     | CADM4     | CADM4     |
| hsa-miR-19a | CAMTA1    | CAMTA1    | CAMTA1    |
| hsa-miR-19a | CARD10    | CARD10    | CARD10    |

|             |          |          |          |
|-------------|----------|----------|----------|
| hsa-miR-19a | CAST     | CAST     | CAST     |
| hsa-miR-19a | CBX1     | CBX1     | CBX1     |
| hsa-miR-19a | CC2D1A   | CC2D1A   | CC2D1A   |
| hsa-miR-19a | CCDC126  | CCDC126  | CCDC126  |
| hsa-miR-19a | CCM2     | CCM2     | CCM2     |
| hsa-miR-19a | CCNL1    | CCNL1    | CCNL1    |
| hsa-miR-19a | CCNT2    | CCNT2    | CCNT2    |
| hsa-miR-19a | CDS1     | CDS1     | CDS1     |
| hsa-miR-19a | CHD5     | CHD5     | CHD5     |
| hsa-miR-19a | CHMP4B   | CHMP4B   | CHMP4B   |
| hsa-miR-19a | CHST1    | CHST1    | CHST1    |
| hsa-miR-19a | CNKSR2   | CNKSR2   | CNKSR2   |
| hsa-miR-19a | CNTFR    | CNTFR    | CNTFR    |
| hsa-miR-19a | CR2      | CR2      | CR2      |
| hsa-miR-19a | CRMP1    | CRMP1    | CRMP1    |
| hsa-miR-19a | CSPP1    | CSPP1    | CSPP1    |
| hsa-miR-19a | DENND4C  | DENND4C  | DENND4C  |
| hsa-miR-19a | DGKG     | DGKG     | DGKG     |
| hsa-miR-19a | DHRS3    | DHRS3    | DHRS3    |
| hsa-miR-19a | DHX40    | DHX40    | DHX40    |
| hsa-miR-19a | DLC1     | DLC1     | DLC1     |
| hsa-miR-19a | DNAI1    | DNAI1    | DNAI1    |
| hsa-miR-19a | DNAJA2   | DNAJA2   | DNAJA2   |
| hsa-miR-19a | DOCK10   | DOCK10   | DOCK10   |
| hsa-miR-19a | DSEL     | DSEL     | DSEL     |
| hsa-miR-19a | E2F8     | E2F8     | E2F8     |
| hsa-miR-19a | EHBP1    | EHBP1    | EHBP1    |
| hsa-miR-19a | ELK3     | ELK3     | ELK3     |
| hsa-miR-19a | ENPP5    | ENPP5    | ENPP5    |
| hsa-miR-19a | ETV5     | ETV5     | ETV5     |
| hsa-miR-19a | FAM114A1 | FAM114A1 | FAM114A1 |
| hsa-miR-19a | FAM43A   | FAM43A   | FAM43A   |
| hsa-miR-19a | FAM46B   | FAM46B   | FAM46B   |
| hsa-miR-19a | FAM59A   | FAM59A   | FAM59A   |
| hsa-miR-19a | FAM69A   | FAM69A   | FAM69A   |
| hsa-miR-19a | FAM83D   | FAM83D   | FAM83D   |
| hsa-miR-19a | FAM83F   | FAM83F   | FAM83F   |
| hsa-miR-19a | FASTK    | FASTK    | FASTK    |
| hsa-miR-19a | FAT3     | FAT3     | FAT3     |
| hsa-miR-19a | FBXO36   | FBXO36   | FBXO36   |
| hsa-miR-19a | FBXO8    | FBXO8    | FBXO8    |
| hsa-miR-19a | FGF6     | FGF6     | FGF6     |
| hsa-miR-19a | FKBP15   | FKBP15   | FKBP15   |
| hsa-miR-19a | FLNC     | FLNC     | FLNC     |
| hsa-miR-19a | FOSL1    | FOSL1    | FOSL1    |
| hsa-miR-19a | FOXD4L1  | FOXD4L1  | FOXD4L1  |
| hsa-miR-19a | FOXF2    | FOXF2    | FOXF2    |
| hsa-miR-19a | FOXP2    | FOXP2    | FOXP2    |
| hsa-miR-19a | FRS2     | FRS2     | FRS2     |
| hsa-miR-19a | GFPT1    | GFPT1    | GFPT1    |
| hsa-miR-19a | GPR137B  | GPR137B  | GPR137B  |

|             |          |          |          |
|-------------|----------|----------|----------|
| hsa-miR-19a | GRK6     | GRK6     | GRK6     |
| hsa-miR-19a | HARS     | HARS     | HARS     |
| hsa-miR-19a | HIP1     | HIP1     | HIP1     |
| hsa-miR-19a | HIPK3    | HIPK3    | HIPK3    |
| hsa-miR-19a | HOXD1    | HOXD1    | HOXD1    |
| hsa-miR-19a | HPRT1    | HPRT1    | HPRT1    |
| hsa-miR-19a | HS2ST1   | HS2ST1   | HS2ST1   |
| hsa-miR-19a | HS3ST5   | HS3ST5   | HS3ST5   |
| hsa-miR-19a | HSPA2    | HSPA2    | HSPA2    |
| hsa-miR-19a | IMPDH1   | IMPDH1   | IMPDH1   |
| hsa-miR-19a | IREB2    | IREB2    | IREB2    |
| hsa-miR-19a | IVNS1ABP | IVNS1ABP | IVNS1ABP |
| hsa-miR-19a | JAKMIP1  | JAKMIP1  | JAKMIP1  |
| hsa-miR-19a | JAZF1    | JAZF1    | JAZF1    |
| hsa-miR-19a | KCNA4    | KCNA4    | KCNA4    |
| hsa-miR-19a | KIAA2013 | KIAA2013 | KIAA2013 |
| hsa-miR-19a | KLHL17   | KLHL17   | KLHL17   |
| hsa-miR-19a | LIN9     | LIN9     | LIN9     |
| hsa-miR-19a | LONRF1   | LONRF1   | LONRF1   |
| hsa-miR-19a | LPP      | LPP      | LPP      |
| hsa-miR-19a | LRIG3    | LRIG3    | LRIG3    |
| hsa-miR-19a | LRP2     | LRP2     | LRP2     |
| hsa-miR-19a | LRRTM2   | LRRTM2   | LRRTM2   |
| hsa-miR-19a | MAP2K3   | MAP2K3   | MAP2K3   |
| hsa-miR-19a | MAP3K12  | MAP3K12  | MAP3K12  |
| hsa-miR-19a | MAP4K3   | MAP4K3   | MAP4K3   |
| hsa-miR-19a | MBD4     | MBD4     | MBD4     |
| hsa-miR-19a | MBD6     | MBD6     | MBD6     |
| hsa-miR-19a | MEMO1    | MEMO1    | MEMO1    |
| hsa-miR-19a | MICAL2   | MICAL2   | MICAL2   |
| hsa-miR-19a | MID1     | MID1     | MID1     |
| hsa-miR-19a | MID1IP1  | MID1IP1  | MID1IP1  |
| hsa-miR-19a | MIER1    | MIER1    | MIER1    |
| hsa-miR-19a | MON2     | MON2     | MON2     |
| hsa-miR-19a | MPPED2   | MPPED2   | MPPED2   |
| hsa-miR-19a | NME7     | NME7     | NME7     |
| hsa-miR-19a | NPAS3    | NPAS3    | NPAS3    |
| hsa-miR-19a | NRBP1    | NRBP1    | NRBP1    |
| hsa-miR-19a | NRP2     | NRP2     | NRP2     |
| hsa-miR-19a | NUDT13   | NUDT13   | NUDT13   |
| hsa-miR-19a | PAK6     | PAK6     | PAK6     |
| hsa-miR-19a | PCDH10   | PCDH10   | PCDH10   |
| hsa-miR-19a | PCDH15   | PCDH15   | PCDH15   |
| hsa-miR-19a | PCDHA7   | PCDHA7   | PCDHA7   |
| hsa-miR-19a | PDE4A    | PDE4A    | PDE4A    |
| hsa-miR-19a | PHF12    | PHF12    | PHF12    |
| hsa-miR-19a | PHF14    | PHF14    | PHF14    |
| hsa-miR-19a | PIK3CA   | PIK3CA   | PIK3CA   |
| hsa-miR-19a | PLA2G10  | PLA2G10  | PLA2G10  |
| hsa-miR-19a | PLAA     | PLAA     | PLAA     |
| hsa-miR-19a | PLCL2    | PLCL2    | PLCL2    |

|             |          |          |          |
|-------------|----------|----------|----------|
| hsa-miR-19a | PLXNC1   | PLXNC1   | PLXNC1   |
| hsa-miR-19a | PNRC1    | PNRC1    | PNRC1    |
| hsa-miR-19a | PON2     | PON2     | PON2     |
| hsa-miR-19a | POSTN    | POSTN    | POSTN    |
| hsa-miR-19a | PRKAA1   | PRKAA1   | PRKAA1   |
| hsa-miR-19a | PSAP     | PSAP     | PSAP     |
| hsa-miR-19a | PSD      | PSD      | PSD      |
| hsa-miR-19a | PTK2B    | PTK2B    | PTK2B    |
| hsa-miR-19a | PTPRG    | PTPRG    | PTPRG    |
| hsa-miR-19a | RAB13    | RAB13    | RAB13    |
| hsa-miR-19a | RAB21    | RAB21    | RAB21    |
| hsa-miR-19a | RAB2B    | RAB2B    | RAB2B    |
| hsa-miR-19a | RAB34    | RAB34    | RAB34    |
| hsa-miR-19a | RAP1A    | RAP1A    | RAP1A    |
| hsa-miR-19a | RAPGEF2  | RAPGEF2  | RAPGEF2  |
| hsa-miR-19a | RAPGEF4  | RAPGEF4  | RAPGEF4  |
| hsa-miR-19a | RBMS1    | RBMS1    | RBMS1    |
| hsa-miR-19a | RDH12    | RDH12    | RDH12    |
| hsa-miR-19a | REEP3    | REEP3    | REEP3    |
| hsa-miR-19a | RFX1     | RFX1     | RFX1     |
| hsa-miR-19a | RFX4     | RFX4     | RFX4     |
| hsa-miR-19a | RHEBL1   | RHEBL1   | RHEBL1   |
| hsa-miR-19a | RHOB     | RHOB     | RHOB     |
| hsa-miR-19a | RNF111   | RNF111   | RNF111   |
| hsa-miR-19a | RNF145   | RNF145   | RNF145   |
| hsa-miR-19a | RNF167   | RNF167   | RNF167   |
| hsa-miR-19a | SC4MOL   | SC4MOL   | SC4MOL   |
| hsa-miR-19a | SCN1B    | SCN1B    | SCN1B    |
| hsa-miR-19a | SEC11A   | SEC11A   | SEC11A   |
| hsa-miR-19a | SEC61A2  | SEC61A2  | SEC61A2  |
| hsa-miR-19a | SEMA4C   | SEMA4C   | SEMA4C   |
| hsa-miR-19a | SFMBT1   | SFMBT1   | SFMBT1   |
| hsa-miR-19a | SH3KBP1  | SH3KBP1  | SH3KBP1  |
| hsa-miR-19a | SIN3B    | SIN3B    | SIN3B    |
| hsa-miR-19a | SIRT5    | SIRT5    | SIRT5    |
| hsa-miR-19a | SLC25A12 | SLC25A12 | SLC25A12 |
| hsa-miR-19a | SLC25A6  | SLC25A6  | SLC25A6  |
| hsa-miR-19a | SLC26A4  | SLC26A4  | SLC26A4  |
| hsa-miR-19a | SLC26A7  | SLC26A7  | SLC26A7  |
| hsa-miR-19a | SLC9A6   | SLC9A6   | SLC9A6   |
| hsa-miR-19a | SMARCA2  | SMARCA2  | SMARCA2  |
| hsa-miR-19a | SNX17    | SNX17    | SNX17    |
| hsa-miR-19a | SOCS1    | SOCS1    | SOCS1    |
| hsa-miR-19a | SOX21    | SOX21    | SOX21    |
| hsa-miR-19a | SPHK2    | SPHK2    | SPHK2    |
| hsa-miR-19a | SPOCK1   | SPOCK1   | SPOCK1   |
| hsa-miR-19a | SPRYD3   | SPRYD3   | SPRYD3   |
| hsa-miR-19a | ST3GAL5  | ST3GAL5  | ST3GAL5  |
| hsa-miR-19a | STK33    | STK33    | STK33    |
| hsa-miR-19a | SYT6     | SYT6     | SYT6     |
| hsa-miR-19a | TAF4     | TAF4     | TAF4     |

|             |           |           |           |
|-------------|-----------|-----------|-----------|
| hsa-miR-19a | TBK1      | TBK1      | TBK1      |
| hsa-miR-19a | TGIF1     | TGIF1     | TGIF1     |
| hsa-miR-19a | TGM3      | TGM3      | TGM3      |
| hsa-miR-19a | THBS1     | THBS1     | THBS1     |
| hsa-miR-19a | TMEM159   | TMEM159   | TMEM159   |
| hsa-miR-19a | TMEM45A   | TMEM45A   | TMEM45A   |
| hsa-miR-19a | TNF       | TNF       | TNF       |
| hsa-miR-19a | TNFRSF12A | TNFRSF12A | TNFRSF12A |
| hsa-miR-19a | TNIP1     | TNIP1     | TNIP1     |
| hsa-miR-19a | TOR1B     | TOR1B     | TOR1B     |
| hsa-miR-19a | TXK       | TXK       | TXK       |
| hsa-miR-19a | UBAP2L    | UBAP2L    | UBAP2L    |
| hsa-miR-19a | USP6      | USP6      | USP6      |
| hsa-miR-19a | VPS37A    | VPS37A    | VPS37A    |
| hsa-miR-19a | VPS4B     | VPS4B     | VPS4B     |
| hsa-miR-19a | WDFY2     | WDFY2     | WDFY2     |
| hsa-miR-19a | WDR20     | WDR20     | WDR20     |
| hsa-miR-19a | WNT1      | WNT1      | WNT1      |
| hsa-miR-19a | WNT3      | WNT3      | WNT3      |
| hsa-miR-19a | WRNIP1    | WRNIP1    | WRNIP1    |
| hsa-miR-19a | ZBTB10    | ZBTB10    | ZBTB10    |
| hsa-miR-19a | ZDHHC7    | ZDHHC7    | ZDHHC7    |
| hsa-miR-19a | ZFPM2     | ZFPM2     | ZFPM2     |
| hsa-miR-19a | ZFYVE9    | ZFYVE9    | ZFYVE9    |
| hsa-miR-19a | ZMYND11   | ZMYND11   | ZMYND11   |
| hsa-miR-19a | ZNF217    | ZNF217    | ZNF217    |
| hsa-miR-19b | ABHD5     | ABHD5     | ABHD5     |
| hsa-miR-19b | ACCN4     | ACCN4     | ACCN4     |
| hsa-miR-19b | ACTN1     | ACTN1     | ACTN1     |
| hsa-miR-19b | AFTPH     | AFTPH     | AFTPH     |
| hsa-miR-19b | ALPK2     | ALPK2     | ALPK2     |
| hsa-miR-19b | ANXA7     | ANXA7     | ANXA7     |
| hsa-miR-19b | ARMC8     | ARMC8     | ARMC8     |
| hsa-miR-19b | ASB7      | ASB7      | ASB7      |
| hsa-miR-19b | ASNA1     | ASNA1     | ASNA1     |
| hsa-miR-19b | ATG4D     | ATG4D     | ATG4D     |
| hsa-miR-19b | ATP10A    | ATP10A    | ATP10A    |
| hsa-miR-19b | B3GALNT2  | B3GALNT2  | B3GALNT2  |
| hsa-miR-19b | BAMBI     | BAMBI     | BAMBI     |
| hsa-miR-19b | BCL3      | BCL3      | BCL3      |
| hsa-miR-19b | BTG1      | BTG1      | BTG1      |
| hsa-miR-19b | C15orf24  | C15orf24  | C15orf24  |
| hsa-miR-19b | C22orf31  | C22orf31  | C22orf31  |
| hsa-miR-19b | C2orf42   | C2orf42   | C2orf42   |
| hsa-miR-19b | C5orf32   | C5orf32   | C5orf32   |
| hsa-miR-19b | CAB39L    | CAB39L    | CAB39L    |
| hsa-miR-19b | CACNA1C   | CACNA1C   | CACNA1C   |
| hsa-miR-19b | CAMTA1    | CAMTA1    | CAMTA1    |
| hsa-miR-19b | CARD10    | CARD10    | CARD10    |
| hsa-miR-19b | CC2D1A    | CC2D1A    | CC2D1A    |
| hsa-miR-19b | CCDC126   | CCDC126   | CCDC126   |

|             |          |          |          |
|-------------|----------|----------|----------|
| hsa-miR-19b | CCM2     | CCM2     | CCM2     |
| hsa-miR-19b | CCNL1    | CCNL1    | CCNL1    |
| hsa-miR-19b | CDS1     | CDS1     | CDS1     |
| hsa-miR-19b | CHMP4B   | CHMP4B   | CHMP4B   |
| hsa-miR-19b | CHST1    | CHST1    | CHST1    |
| hsa-miR-19b | CLIP1    | CLIP1    | CLIP1    |
| hsa-miR-19b | CNGA3    | CNGA3    | CNGA3    |
| hsa-miR-19b | CNKSR2   | CNKSR2   | CNKSR2   |
| hsa-miR-19b | CNTFR    | CNTFR    | CNTFR    |
| hsa-miR-19b | CR2      | CR2      | CR2      |
| hsa-miR-19b | CRMP1    | CRMP1    | CRMP1    |
| hsa-miR-19b | DENND4C  | DENND4C  | DENND4C  |
| hsa-miR-19b | DGKG     | DGKG     | DGKG     |
| hsa-miR-19b | DHRS3    | DHRS3    | DHRS3    |
| hsa-miR-19b | DNAI1    | DNAI1    | DNAI1    |
| hsa-miR-19b | DNAJA2   | DNAJA2   | DNAJA2   |
| hsa-miR-19b | DOCK10   | DOCK10   | DOCK10   |
| hsa-miR-19b | DSEL     | DSEL     | DSEL     |
| hsa-miR-19b | E2F8     | E2F8     | E2F8     |
| hsa-miR-19b | EHBP1    | EHBP1    | EHBP1    |
| hsa-miR-19b | EIF4E3   | EIF4E3   | EIF4E3   |
| hsa-miR-19b | ELK3     | ELK3     | ELK3     |
| hsa-miR-19b | ENPP5    | ENPP5    | ENPP5    |
| hsa-miR-19b | ETV5     | ETV5     | ETV5     |
| hsa-miR-19b | FAM114A1 | FAM114A1 | FAM114A1 |
| hsa-miR-19b | FAM43A   | FAM43A   | FAM43A   |
| hsa-miR-19b | FAM46B   | FAM46B   | FAM46B   |
| hsa-miR-19b | FAM59A   | FAM59A   | FAM59A   |
| hsa-miR-19b | FAM69A   | FAM69A   | FAM69A   |
| hsa-miR-19b | FAM83D   | FAM83D   | FAM83D   |
| hsa-miR-19b | FAM83F   | FAM83F   | FAM83F   |
| hsa-miR-19b | FASTK    | FASTK    | FASTK    |
| hsa-miR-19b | FAT3     | FAT3     | FAT3     |
| hsa-miR-19b | FBXO36   | FBXO36   | FBXO36   |
| hsa-miR-19b | FBXO8    | FBXO8    | FBXO8    |
| hsa-miR-19b | FGF6     | FGF6     | FGF6     |
| hsa-miR-19b | FKBP15   | FKBP15   | FKBP15   |
| hsa-miR-19b | FLNC     | FLNC     | FLNC     |
| hsa-miR-19b | FOXD4L1  | FOXD4L1  | FOXD4L1  |
| hsa-miR-19b | FOXF2    | FOXF2    | FOXF2    |
| hsa-miR-19b | FOXP2    | FOXP2    | FOXP2    |
| hsa-miR-19b | FRMPD2   | FRMPD2   | FRMPD2   |
| hsa-miR-19b | FRS2     | FRS2     | FRS2     |
| hsa-miR-19b | GPR137B  | GPR137B  | GPR137B  |
| hsa-miR-19b | GRK6     | GRK6     | GRK6     |
| hsa-miR-19b | HARS     | HARS     | HARS     |
| hsa-miR-19b | HIP1     | HIP1     | HIP1     |
| hsa-miR-19b | HIPK3    | HIPK3    | HIPK3    |
| hsa-miR-19b | HOXD1    | HOXD1    | HOXD1    |
| hsa-miR-19b | HPRT1    | HPRT1    | HPRT1    |
| hsa-miR-19b | HS3ST5   | HS3ST5   | HS3ST5   |

|             |          |          |          |
|-------------|----------|----------|----------|
| hsa-miR-19b | HSPA2    | HSPA2    | HSPA2    |
| hsa-miR-19b | IMPDH1   | IMPDH1   | IMPDH1   |
| hsa-miR-19b | IREB2    | IREB2    | IREB2    |
| hsa-miR-19b | IVNS1ABP | IVNS1ABP | IVNS1ABP |
| hsa-miR-19b | JAKMIP1  | JAKMIP1  | JAKMIP1  |
| hsa-miR-19b | KCNA4    | KCNA4    | KCNA4    |
| hsa-miR-19b | KCNC4    | KCNC4    | KCNC4    |
| hsa-miR-19b | KCNQ5    | KCNQ5    | KCNQ5    |
| hsa-miR-19b | KIAA2013 | KIAA2013 | KIAA2013 |
| hsa-miR-19b | KIF3A    | KIF3A    | KIF3A    |
| hsa-miR-19b | KLHL17   | KLHL17   | KLHL17   |
| hsa-miR-19b | LIN9     | LIN9     | LIN9     |
| hsa-miR-19b | LONRF1   | LONRF1   | LONRF1   |
| hsa-miR-19b | LRIG3    | LRIG3    | LRIG3    |
| hsa-miR-19b | LRP12    | LRP12    | LRP12    |
| hsa-miR-19b | LRP2     | LRP2     | LRP2     |
| hsa-miR-19b | LRRTM2   | LRRTM2   | LRRTM2   |
| hsa-miR-19b | MAP2K3   | MAP2K3   | MAP2K3   |
| hsa-miR-19b | MAP4K3   | MAP4K3   | MAP4K3   |
| hsa-miR-19b | MBD4     | MBD4     | MBD4     |
| hsa-miR-19b | MBD6     | MBD6     | MBD6     |
| hsa-miR-19b | MEMO1    | MEMO1    | MEMO1    |
| hsa-miR-19b | MICAL2   | MICAL2   | MICAL2   |
| hsa-miR-19b | MID1     | MID1     | MID1     |
| hsa-miR-19b | MID1IP1  | MID1IP1  | MID1IP1  |
| hsa-miR-19b | MIER1    | MIER1    | MIER1    |
| hsa-miR-19b | MON2     | MON2     | MON2     |
| hsa-miR-19b | MPPED2   | MPPED2   | MPPED2   |
| hsa-miR-19b | NDFIP2   | NDFIP2   | NDFIP2   |
| hsa-miR-19b | NEUROD1  | NEUROD1  | NEUROD1  |
| hsa-miR-19b | NME7     | NME7     | NME7     |
| hsa-miR-19b | NPAS3    | NPAS3    | NPAS3    |
| hsa-miR-19b | NRBP1    | NRBP1    | NRBP1    |
| hsa-miR-19b | NRP2     | NRP2     | NRP2     |
| hsa-miR-19b | NUDT13   | NUDT13   | NUDT13   |
| hsa-miR-19b | PCDH10   | PCDH10   | PCDH10   |
| hsa-miR-19b | PCDHA7   | PCDHA7   | PCDHA7   |
| hsa-miR-19b | PDE4A    | PDE4A    | PDE4A    |
| hsa-miR-19b | PHF12    | PHF12    | PHF12    |
| hsa-miR-19b | PIK3CA   | PIK3CA   | PIK3CA   |
| hsa-miR-19b | PLA2G10  | PLA2G10  | PLA2G10  |
| hsa-miR-19b | PLAA     | PLAA     | PLAA     |
| hsa-miR-19b | PLCL2    | PLCL2    | PLCL2    |
| hsa-miR-19b | PLXNC1   | PLXNC1   | PLXNC1   |
| hsa-miR-19b | PNRC1    | PNRC1    | PNRC1    |
| hsa-miR-19b | PON2     | PON2     | PON2     |
| hsa-miR-19b | POSTN    | POSTN    | POSTN    |
| hsa-miR-19b | PRKAA1   | PRKAA1   | PRKAA1   |
| hsa-miR-19b | PSAP     | PSAP     | PSAP     |
| hsa-miR-19b | PSD      | PSD      | PSD      |
| hsa-miR-19b | PTK2B    | PTK2B    | PTK2B    |

|             |           |           |           |
|-------------|-----------|-----------|-----------|
| hsa-miR-19b | PTPRG     | PTPRG     | PTPRG     |
| hsa-miR-19b | RAB13     | RAB13     | RAB13     |
| hsa-miR-19b | RAB21     | RAB21     | RAB21     |
| hsa-miR-19b | RAB34     | RAB34     | RAB34     |
| hsa-miR-19b | RAP1A     | RAP1A     | RAP1A     |
| hsa-miR-19b | RAPGEF2   | RAPGEF2   | RAPGEF2   |
| hsa-miR-19b | RAPGEF4   | RAPGEF4   | RAPGEF4   |
| hsa-miR-19b | RDH12     | RDH12     | RDH12     |
| hsa-miR-19b | REEP3     | REEP3     | REEP3     |
| hsa-miR-19b | RFX1      | RFX1      | RFX1      |
| hsa-miR-19b | RFX4      | RFX4      | RFX4      |
| hsa-miR-19b | RHEBL1    | RHEBL1    | RHEBL1    |
| hsa-miR-19b | RHOB      | RHOB      | RHOB      |
| hsa-miR-19b | RNF11     | RNF11     | RNF11     |
| hsa-miR-19b | RNF111    | RNF111    | RNF111    |
| hsa-miR-19b | RNF167    | RNF167    | RNF167    |
| hsa-miR-19b | SC4MOL    | SC4MOL    | SC4MOL    |
| hsa-miR-19b | SCN1B     | SCN1B     | SCN1B     |
| hsa-miR-19b | SEC11A    | SEC11A    | SEC11A    |
| hsa-miR-19b | SEC22A    | SEC22A    | SEC22A    |
| hsa-miR-19b | SEC61A2   | SEC61A2   | SEC61A2   |
| hsa-miR-19b | SEMA4C    | SEMA4C    | SEMA4C    |
| hsa-miR-19b | SFMBT1    | SFMBT1    | SFMBT1    |
| hsa-miR-19b | SIN3B     | SIN3B     | SIN3B     |
| hsa-miR-19b | SIRT5     | SIRT5     | SIRT5     |
| hsa-miR-19b | SLC25A6   | SLC25A6   | SLC25A6   |
| hsa-miR-19b | SLC26A7   | SLC26A7   | SLC26A7   |
| hsa-miR-19b | SMARCA2   | SMARCA2   | SMARCA2   |
| hsa-miR-19b | SMARCD2   | SMARCD2   | SMARCD2   |
| hsa-miR-19b | SNX17     | SNX17     | SNX17     |
| hsa-miR-19b | SOCS1     | SOCS1     | SOCS1     |
| hsa-miR-19b | SOX21     | SOX21     | SOX21     |
| hsa-miR-19b | SOX4      | SOX4      | SOX4      |
| hsa-miR-19b | SPHK2     | SPHK2     | SPHK2     |
| hsa-miR-19b | SPOCK1    | SPOCK1    | SPOCK1    |
| hsa-miR-19b | SPRYD3    | SPRYD3    | SPRYD3    |
| hsa-miR-19b | ST3GAL5   | ST3GAL5   | ST3GAL5   |
| hsa-miR-19b | STK33     | STK33     | STK33     |
| hsa-miR-19b | SYT6      | SYT6      | SYT6      |
| hsa-miR-19b | TAF4      | TAF4      | TAF4      |
| hsa-miR-19b | TBK1      | TBK1      | TBK1      |
| hsa-miR-19b | TGIF1     | TGIF1     | TGIF1     |
| hsa-miR-19b | TGM3      | TGM3      | TGM3      |
| hsa-miR-19b | TMEM159   | TMEM159   | TMEM159   |
| hsa-miR-19b | TMEM45A   | TMEM45A   | TMEM45A   |
| hsa-miR-19b | TNFRSF12A | TNFRSF12A | TNFRSF12A |
| hsa-miR-19b | TNIP1     | TNIP1     | TNIP1     |
| hsa-miR-19b | TOR1B     | TOR1B     | TOR1B     |
| hsa-miR-19b | TRPM6     | TRPM6     | TRPM6     |
| hsa-miR-19b | TXK       | TXK       | TXK       |
| hsa-miR-19b | UBAP2L    | UBAP2L    | UBAP2L    |



|             |         |         |         |
|-------------|---------|---------|---------|
| hsa-miR-19b | USP6    | USP6    | USP6    |
| hsa-miR-19b | VPS37A  | VPS37A  | VPS37A  |
| hsa-miR-19b | VPS4B   | VPS4B   | VPS4B   |
| hsa-miR-19b | WDFY2   | WDFY2   | WDFY2   |
| hsa-miR-19b | WDR20   | WDR20   | WDR20   |
| hsa-miR-19b | WNT1    | WNT1    | WNT1    |
| hsa-miR-19b | WNT3    | WNT3    | WNT3    |
| hsa-miR-19b | WRNIP1  | WRNIP1  | WRNIP1  |
| hsa-miR-19b | ZBTB10  | ZBTB10  | ZBTB10  |
| hsa-miR-19b | ZDHHC7  | ZDHHC7  | ZDHHC7  |
| hsa-miR-19b | ZFYVE9  | ZFYVE9  | ZFYVE9  |
| hsa-miR-19b | ZMYND11 | ZMYND11 | ZMYND11 |
| hsa-miR-19b | ZNF217  | ZNF217  | ZNF217  |
| hsa-miR-19b | ZNF3    | ZNF3    | ZNF3    |
| hsa-miR-20b | ACPL2   | ACPL2   | ACPL2   |
| hsa-miR-20b | ADRA1B  | ADRA1B  | ADRA1B  |
| hsa-miR-20b | ANKRD9  | ANKRD9  | ANKRD9  |
| hsa-miR-20b | APP     | APP     | APP     |
| hsa-miR-20b | ARID4B  | ARID4B  | ARID4B  |
| hsa-miR-20b | ATAD2   | ATAD2   | ATAD2   |
| hsa-miR-20b | ATXN7L1 | ATXN7L1 | ATXN7L1 |
| hsa-miR-20b | BAMBI   | BAMBI   | BAMBI   |
| hsa-miR-20b | BNIP2   | BNIP2   | BNIP2   |
| hsa-miR-20b | BTG3    | BTG3    | BTG3    |
| hsa-miR-20b | C1orf63 | C1orf63 | C1orf63 |
| hsa-miR-20b | C7orf43 | C7orf43 | C7orf43 |
| hsa-miR-20b | CAMTA2  | CAMTA2  | CAMTA2  |
| hsa-miR-20b | CAPRIN2 | CAPRIN2 | CAPRIN2 |
| hsa-miR-20b | CC2D1A  | CC2D1A  | CC2D1A  |
| hsa-miR-20b | CCL1    | CCL1    | CCL1    |
| hsa-miR-20b | CDC37L1 | CDC37L1 | CDC37L1 |
| hsa-miR-20b | CHAF1A  | CHAF1A  | CHAF1A  |
| hsa-miR-20b | CHD5    | CHD5    | CHD5    |
| hsa-miR-20b | CNN1    | CNN1    | CNN1    |
| hsa-miR-20b | CNNM3   | CNNM3   | CNNM3   |
| hsa-miR-20b | COL4A3  | COL4A3  | COL4A3  |
| hsa-miR-20b | COQ2    | COQ2    | COQ2    |
| hsa-miR-20b | CROT    | CROT    | CROT    |
| hsa-miR-20b | CTSA    | CTSA    | CTSA    |
| hsa-miR-20b | DDHD1   | DDHD1   | DDHD1   |
| hsa-miR-20b | DDX5    | DDX5    | DDX5    |
| hsa-miR-20b | DIP2A   | DIP2A   | DIP2A   |
| hsa-miR-20b | DPYSL5  | DPYSL5  | DPYSL5  |
| hsa-miR-20b | E2F5    | E2F5    | E2F5    |
| hsa-miR-20b | EFCAB5  | EFCAB5  | EFCAB5  |
| hsa-miR-20b | ENTPD4  | ENTPD4  | ENTPD4  |
| hsa-miR-20b | EPB41   | EPB41   | EPB41   |
| hsa-miR-20b | EPHA5   | EPHA5   | EPHA5   |
| hsa-miR-20b | ERBB3   | ERBB3   | ERBB3   |
| hsa-miR-20b | FASTK   | FASTK   | FASTK   |
| hsa-miR-20b | FBXO39  | FBXO39  | FBXO39  |

|             |          |          |          |
|-------------|----------|----------|----------|
| hsa-miR-20b | FGD1     | FGD1     | FGD1     |
| hsa-miR-20b | FGD4     | FGD4     | FGD4     |
| hsa-miR-20b | FGF4     | FGF4     | FGF4     |
| hsa-miR-20b | FNDC3A   | FNDC3A   | FNDC3A   |
| hsa-miR-20b | FOXQ1    | FOXQ1    | FOXQ1    |
| hsa-miR-20b | GNB5     | GNB5     | GNB5     |
| hsa-miR-20b | GPR6     | GPR6     | GPR6     |
| hsa-miR-20b | GRAMD1A  | GRAMD1A  | GRAMD1A  |
| hsa-miR-20b | HPS5     | HPS5     | HPS5     |
| hsa-miR-20b | HSPA6    | HSPA6    | HSPA6    |
| hsa-miR-20b | ILDR1    | ILDR1    | ILDR1    |
| hsa-miR-20b | ITFG1    | ITFG1    | ITFG1    |
| hsa-miR-20b | ITGB8    | ITGB8    | ITGB8    |
| hsa-miR-20b | KIAA0922 | KIAA0922 | KIAA0922 |
| hsa-miR-20b | KIAA1191 | KIAA1191 | KIAA1191 |
| hsa-miR-20b | KLHL22   | KLHL22   | KLHL22   |
| hsa-miR-20b | KPNA2    | KPNA2    | KPNA2    |
| hsa-miR-20b | LAMA3    | LAMA3    | LAMA3    |
| hsa-miR-20b | LAPTM4A  | LAPTM4A  | LAPTM4A  |
| hsa-miR-20b | LHX8     | LHX8     | LHX8     |
| hsa-miR-20b | MAP3K9   | MAP3K9   | MAP3K9   |
| hsa-miR-20b | MAPK9    | MAPK9    | MAPK9    |
| hsa-miR-20b | MARK4    | MARK4    | MARK4    |
| hsa-miR-20b | MCM3     | MCM3     | MCM3     |
| hsa-miR-20b | METAP1   | METAP1   | METAP1   |
| hsa-miR-20b | MYCN     | MYCN     | MYCN     |
| hsa-miR-20b | NEUROG2  | NEUROG2  | NEUROG2  |
| hsa-miR-20b | NPAS3    | NPAS3    | NPAS3    |
| hsa-miR-20b | NPLOC4   | NPLOC4   | NPLOC4   |
| hsa-miR-20b | OSTM1    | OSTM1    | OSTM1    |
| hsa-miR-20b | PAFAH2   | PAFAH2   | PAFAH2   |
| hsa-miR-20b | PAM      | PAM      | PAM      |
| hsa-miR-20b | PBK      | PBK      | PBK      |
| hsa-miR-20b | PFKP     | PFKP     | PFKP     |
| hsa-miR-20b | POLQ     | POLQ     | POLQ     |
| hsa-miR-20b | PPP3R1   | PPP3R1   | PPP3R1   |
| hsa-miR-20b | PRRG4    | PRRG4    | PRRG4    |
| hsa-miR-20b | PTGER3   | PTGER3   | PTGER3   |
| hsa-miR-20b | PTPN4    | PTPN4    | PTPN4    |
| hsa-miR-20b | SACS     | SACS     | SACS     |
| hsa-miR-20b | SC4MOL   | SC4MOL   | SC4MOL   |
| hsa-miR-20b | SCAMP2   | SCAMP2   | SCAMP2   |
| hsa-miR-20b | SFMBT1   | SFMBT1   | SFMBT1   |
| hsa-miR-20b | SLC40A1  | SLC40A1  | SLC40A1  |
| hsa-miR-20b | SLC46A3  | SLC46A3  | SLC46A3  |
| hsa-miR-20b | SORL1    | SORL1    | SORL1    |
| hsa-miR-20b | SPTY2D1  | SPTY2D1  | SPTY2D1  |
| hsa-miR-20b | STAT3    | STAT3    | STAT3    |
| hsa-miR-20b | STK17B   | STK17B   | STK17B   |
| hsa-miR-20b | STK33    | STK33    | STK33    |
| hsa-miR-20b | TAOK2    | TAOK2    | TAOK2    |

|             |          |          |          |
|-------------|----------|----------|----------|
| hsa-miR-20b | TGFB1I1  | TGFB1I1  | TGFB1I1  |
| hsa-miR-20b | TLE4     | TLE4     | TLE4     |
| hsa-miR-20b | TMUB2    | TMUB2    | TMUB2    |
| hsa-miR-20b | TNKS1BP1 | TNKS1BP1 | TNKS1BP1 |
| hsa-miR-20b | TRIM3    | TRIM3    | TRIM3    |
| hsa-miR-20b | TRIM8    | TRIM8    | TRIM8    |
| hsa-miR-20b | TRIP11   | TRIP11   | TRIP11   |
| hsa-miR-20b | TRPV6    | TRPV6    | TRPV6    |
| hsa-miR-20b | TSG101   | TSG101   | TSG101   |
| hsa-miR-20b | TSHZ3    | TSHZ3    | TSHZ3    |
| hsa-miR-20b | UBASH3A  | UBASH3A  | UBASH3A  |
| hsa-miR-20b | UNKL     | UNKL     | UNKL     |
| hsa-miR-20b | USP54    | USP54    | USP54    |
| hsa-miR-20b | VLDLR    | VLDLR    | VLDLR    |
| hsa-miR-20b | VSX1     | VSX1     | VSX1     |
| hsa-miR-20b | WEE1     | WEE1     | WEE1     |
| hsa-miR-20b | ZDHHC1   | ZDHHC1   | ZDHHC1   |
| hsa-miR-20b | ZFYVE9   | ZFYVE9   | ZFYVE9   |
| hsa-miR-20b | ZNF597   | ZNF597   | ZNF597   |
| hsa-miR-20b | ZNF618   | ZNF618   | ZNF618   |
| hsa-miR-20b | ZNFX1    | ZNFX1    | ZNFX1    |
| hsa-miR-212 | ACP2     | ACP2     | ACP2     |
| hsa-miR-212 | ADAMTS6  | ADAMTS6  | ADAMTS6  |
| hsa-miR-212 | ADRA1A   | ADRA1A   | ADRA1A   |
| hsa-miR-212 | AMOT     | AMOT     | AMOT     |
| hsa-miR-212 | APOLD1   | APOLD1   | APOLD1   |
| hsa-miR-212 | ARMC5    | ARMC5    | ARMC5    |
| hsa-miR-212 | ARX      | ARX      | ARX      |
| hsa-miR-212 | ATP6V0D1 | ATP6V0D1 | ATP6V0D1 |
| hsa-miR-212 | BMPR1A   | BMPR1A   | BMPR1A   |
| hsa-miR-212 | BNC2     | BNC2     | BNC2     |
| hsa-miR-212 | BTG2     | BTG2     | BTG2     |
| hsa-miR-212 | C19orf47 | C19orf47 | C19orf47 |
| hsa-miR-212 | C3orf62  | C3orf62  | C3orf62  |
| hsa-miR-212 | CALU     | CALU     | CALU     |
| hsa-miR-212 | CBLL1    | CBLL1    | CBLL1    |
| hsa-miR-212 | CBX1     | CBX1     | CBX1     |
| hsa-miR-212 | CC2D1B   | CC2D1B   | CC2D1B   |
| hsa-miR-212 | CPT1B    | CPT1B    | CPT1B    |
| hsa-miR-212 | CSF1     | CSF1     | CSF1     |
| hsa-miR-212 | CUL4A    | CUL4A    | CUL4A    |
| hsa-miR-212 | CWF19L1  | CWF19L1  | CWF19L1  |
| hsa-miR-212 | DCUN1D3  | DCUN1D3  | DCUN1D3  |
| hsa-miR-212 | DDO      | DDO      | DDO      |
| hsa-miR-212 | DERL1    | DERL1    | DERL1    |
| hsa-miR-212 | DGCR8    | DGCR8    | DGCR8    |
| hsa-miR-212 | DPYD     | DPYD     | DPYD     |
| hsa-miR-212 | DUSP9    | DUSP9    | DUSP9    |
| hsa-miR-212 | DYNLL2   | DYNLL2   | DYNLL2   |
| hsa-miR-212 | DYRK2    | DYRK2    | DYRK2    |
| hsa-miR-212 | E2F5     | E2F5     | E2F5     |

|             |          |          |          |
|-------------|----------|----------|----------|
| hsa-miR-212 | EBF3     | EBF3     | EBF3     |
| hsa-miR-212 | EDA      | EDA      | EDA      |
| hsa-miR-212 | EDNRA    | EDNRA    | EDNRA    |
| hsa-miR-212 | EIF4A2   | EIF4A2   | EIF4A2   |
| hsa-miR-212 | EMG1     | EMG1     | EMG1     |
| hsa-miR-212 | EPB41    | EPB41    | EPB41    |
| hsa-miR-212 | FAM63A   | FAM63A   | FAM63A   |
| hsa-miR-212 | FKBP2    | FKBP2    | FKBP2    |
| hsa-miR-212 | FOXP1    | FOXP1    | FOXP1    |
| hsa-miR-212 | FOXP2    | FOXP2    | FOXP2    |
| hsa-miR-212 | FRMD5    | FRMD5    | FRMD5    |
| hsa-miR-212 | GAPVD1   | GAPVD1   | GAPVD1   |
| hsa-miR-212 | GDA      | GDA      | GDA      |
| hsa-miR-212 | GDF5     | GDF5     | GDF5     |
| hsa-miR-212 | GPRC5B   | GPRC5B   | GPRC5B   |
| hsa-miR-212 | GRM3     | GRM3     | GRM3     |
| hsa-miR-212 | GRSF1    | GRSF1    | GRSF1    |
| hsa-miR-212 | GTDC1    | GTDC1    | GTDC1    |
| hsa-miR-212 | GTF2H1   | GTF2H1   | GTF2H1   |
| hsa-miR-212 | H2AFZ    | H2AFZ    | H2AFZ    |
| hsa-miR-212 | HBEGF    | HBEGF    | HBEGF    |
| hsa-miR-212 | HHIP     | HHIP     | HHIP     |
| hsa-miR-212 | HSD11B1  | HSD11B1  | HSD11B1  |
| hsa-miR-212 | INTS6    | INTS6    | INTS6    |
| hsa-miR-212 | KCNJ12   | KCNJ12   | KCNJ12   |
| hsa-miR-212 | LOX      | LOX      | LOX      |
| hsa-miR-212 | LRRFIP1  | LRRFIP1  | LRRFIP1  |
| hsa-miR-212 | LYN      | LYN      | LYN      |
| hsa-miR-212 | MAPK3    | MAPK3    | MAPK3    |
| hsa-miR-212 | MARVELD3 | MARVELD3 | MARVELD3 |
| hsa-miR-212 | MBP      | MBP      | MBP      |
| hsa-miR-212 | MED9     | MED9     | MED9     |
| hsa-miR-212 | MIA3     | MIA3     | MIA3     |
| hsa-miR-212 | MIPOL1   | MIPOL1   | MIPOL1   |
| hsa-miR-212 | MR1      | MR1      | MR1      |
| hsa-miR-212 | MRPL43   | MRPL43   | MRPL43   |
| hsa-miR-212 | MYCBP2   | MYCBP2   | MYCBP2   |
| hsa-miR-212 | MYPN     | MYPN     | MYPN     |
| hsa-miR-212 | NOS1     | NOS1     | NOS1     |
| hsa-miR-212 | NOV      | NOV      | NOV      |
| hsa-miR-212 | NRCAM    | NRCAM    | NRCAM    |
| hsa-miR-212 | NTNG1    | NTNG1    | NTNG1    |
| hsa-miR-212 | PAIP2    | PAIP2    | PAIP2    |
| hsa-miR-212 | PCNT     | PCNT     | PCNT     |
| hsa-miR-212 | PEA15    | PEA15    | PEA15    |
| hsa-miR-212 | PHF17    | PHF17    | PHF17    |
| hsa-miR-212 | PIGS     | PIGS     | PIGS     |
| hsa-miR-212 | PNKD     | PNKD     | PNKD     |
| hsa-miR-212 | PNPLA3   | PNPLA3   | PNPLA3   |
| hsa-miR-212 | POM121   | POM121   | POM121   |
| hsa-miR-212 | PPP2CB   | PPP2CB   | PPP2CB   |

|             |          |          |          |
|-------------|----------|----------|----------|
| hsa-miR-212 | PTPRF    | PTPRF    | PTPRF    |
| hsa-miR-212 | RAB1A    | RAB1A    | RAB1A    |
| hsa-miR-212 | RASA1    | RASA1    | RASA1    |
| hsa-miR-212 | RPL13A   | RPL13A   | RPL13A   |
| hsa-miR-212 | RPL22    | RPL22    | RPL22    |
| hsa-miR-212 | RPP14    | RPP14    | RPP14    |
| hsa-miR-212 | RRS1     | RRS1     | RRS1     |
| hsa-miR-212 | RSU1     | RSU1     | RSU1     |
| hsa-miR-212 | SAP30L   | SAP30L   | SAP30L   |
| hsa-miR-212 | SCN2A    | SCN2A    | SCN2A    |
| hsa-miR-212 | SCNN1B   | SCNN1B   | SCNN1B   |
| hsa-miR-212 | SEMA4G   | SEMA4G   | SEMA4G   |
| hsa-miR-212 | SLAIN2   | SLAIN2   | SLAIN2   |
| hsa-miR-212 | SLC23A2  | SLC23A2  | SLC23A2  |
| hsa-miR-212 | SLC24A3  | SLC24A3  | SLC24A3  |
| hsa-miR-212 | SLC25A28 | SLC25A28 | SLC25A28 |
| hsa-miR-212 | SLC2A1   | SLC2A1   | SLC2A1   |
| hsa-miR-212 | SLC37A1  | SLC37A1  | SLC37A1  |
| hsa-miR-212 | SOX3     | SOX3     | SOX3     |
| hsa-miR-212 | SPRN     | SPRN     | SPRN     |
| hsa-miR-212 | SUPT4H1  | SUPT4H1  | SUPT4H1  |
| hsa-miR-212 | SYNE2    | SYNE2    | SYNE2    |
| hsa-miR-212 | TCF15    | TCF15    | TCF15    |
| hsa-miR-212 | TCF7L1   | TCF7L1   | TCF7L1   |
| hsa-miR-212 | THSD4    | THSD4    | THSD4    |
| hsa-miR-212 | TIMM9    | TIMM9    | TIMM9    |
| hsa-miR-212 | TJAP1    | TJAP1    | TJAP1    |
| hsa-miR-212 | TLN2     | TLN2     | TLN2     |
| hsa-miR-212 | TMEM136  | TMEM136  | TMEM136  |
| hsa-miR-212 | TMEM39B  | TMEM39B  | TMEM39B  |
| hsa-miR-212 | TMEM51   | TMEM51   | TMEM51   |
| hsa-miR-212 | TMEM87A  | TMEM87A  | TMEM87A  |
| hsa-miR-212 | TRIB3    | TRIB3    | TRIB3    |
| hsa-miR-212 | TRIM26   | TRIM26   | TRIM26   |
| hsa-miR-212 | TTK      | TTK      | TTK      |
| hsa-miR-212 | TUSC2    | TUSC2    | TUSC2    |
| hsa-miR-212 | USP9X    | USP9X    | USP9X    |
| hsa-miR-212 | YLPM1    | YLPM1    | YLPM1    |
| hsa-miR-212 | ZCCHC11  | ZCCHC11  | ZCCHC11  |
| hsa-miR-212 | ZFHX4    | ZFHX4    | ZFHX4    |
| hsa-miR-212 | ZNF516   | ZNF516   | ZNF516   |
| hsa-miR-212 | ZNF644   | ZNF644   | ZNF644   |
| hsa-miR-212 | ZNF696   | ZNF696   | ZNF696   |
| hsa-miR-224 | ANK3     | ANK3     | ANK3     |
| hsa-miR-224 | AP2M1    | AP2M1    | AP2M1    |
| hsa-miR-224 | ARHGAP21 | ARHGAP21 | ARHGAP21 |
| hsa-miR-224 | ARMCX2   | ARMCX2   | ARMCX2   |
| hsa-miR-224 | C18orf34 | C18orf34 | C18orf34 |
| hsa-miR-224 | C9orf80  | C9orf80  | C9orf80  |
| hsa-miR-224 | CAST     | CAST     | CAST     |
| hsa-miR-224 | CCDC28B  | CCDC28B  | CCDC28B  |

|             |          |          |          |
|-------------|----------|----------|----------|
| hsa-miR-224 | CCDC71   | CCDC71   | CCDC71   |
| hsa-miR-224 | CDK9     | CDK9     | CDK9     |
| hsa-miR-224 | CPSF6    | CPSF6    | CPSF6    |
| hsa-miR-224 | CSTF2    | CSTF2    | CSTF2    |
| hsa-miR-224 | DDX52    | DDX52    | DDX52    |
| hsa-miR-224 | DNAJC8   | DNAJC8   | DNAJC8   |
| hsa-miR-224 | DNM1     | DNM1     | DNM1     |
| hsa-miR-224 | DOT1L    | DOT1L    | DOT1L    |
| hsa-miR-224 | DPYSL2   | DPYSL2   | DPYSL2   |
| hsa-miR-224 | DUSP11   | DUSP11   | DUSP11   |
| hsa-miR-224 | EIF2AK3  | EIF2AK3  | EIF2AK3  |
| hsa-miR-224 | EPC2     | EPC2     | EPC2     |
| hsa-miR-224 | FAM49B   | FAM49B   | FAM49B   |
| hsa-miR-224 | FGB      | FGB      | FGB      |
| hsa-miR-224 | FGF14    | FGF14    | FGF14    |
| hsa-miR-224 | GSK3B    | GSK3B    | GSK3B    |
| hsa-miR-224 | HEBP1    | HEBP1    | HEBP1    |
| hsa-miR-224 | HES5     | HES5     | HES5     |
| hsa-miR-224 | HGSNAT   | HGSNAT   | HGSNAT   |
| hsa-miR-224 | HMOX2    | HMOX2    | HMOX2    |
| hsa-miR-224 | HOXA11   | HOXA11   | HOXA11   |
| hsa-miR-224 | HOXA5    | HOXA5    | HOXA5    |
| hsa-miR-224 | HOXD10   | HOXD10   | HOXD10   |
| hsa-miR-224 | IPO7     | IPO7     | IPO7     |
| hsa-miR-224 | KDELRL1  | KDELRL1  | KDELRL1  |
| hsa-miR-224 | KLK15    | KLK15    | KLK15    |
| hsa-miR-224 | L1CAM    | L1CAM    | L1CAM    |
| hsa-miR-224 | MAF1     | MAF1     | MAF1     |
| hsa-miR-224 | NDUFA8   | NDUFA8   | NDUFA8   |
| hsa-miR-224 | NPAS4    | NPAS4    | NPAS4    |
| hsa-miR-224 | NSMAF    | NSMAF    | NSMAF    |
| hsa-miR-224 | NUP153   | NUP153   | NUP153   |
| hsa-miR-224 | PDE8A    | PDE8A    | PDE8A    |
| hsa-miR-224 | PEBP1    | PEBP1    | PEBP1    |
| hsa-miR-224 | PFKFB3   | PFKFB3   | PFKFB3   |
| hsa-miR-224 | PTX3     | PTX3     | PTX3     |
| hsa-miR-224 | QKI      | QKI      | QKI      |
| hsa-miR-224 | RBM10    | RBM10    | RBM10    |
| hsa-miR-224 | RELN     | RELN     | RELN     |
| hsa-miR-224 | RNF121   | RNF121   | RNF121   |
| hsa-miR-224 | RNF38    | RNF38    | RNF38    |
| hsa-miR-224 | SEPT3    | SEPT3    | SEPT3    |
| hsa-miR-224 | SERPINE1 | SERPINE1 | SERPINE1 |
| hsa-miR-224 | SFRP2    | SFRP2    | SFRP2    |
| hsa-miR-224 | SH3KBP1  | SH3KBP1  | SH3KBP1  |
| hsa-miR-224 | SLC25A12 | SLC25A12 | SLC25A12 |
| hsa-miR-224 | TMC5     | TMC5     | TMC5     |
| hsa-miR-224 | TMEM108  | TMEM108  | TMEM108  |
| hsa-miR-224 | TMEM9B   | TMEM9B   | TMEM9B   |
| hsa-miR-224 | TRIM9    | TRIM9    | TRIM9    |
| hsa-miR-224 | YIPF6    | YIPF6    | YIPF6    |

|             |           |           |           |
|-------------|-----------|-----------|-----------|
| hsa-miR-224 | ZDHHC20   | ZDHHC20   | ZDHHC20   |
| hsa-miR-224 | ZNF174    | ZNF174    | ZNF174    |
| hsa-miR-224 | ZNF207    | ZNF207    | ZNF207    |
| hsa-miR-32  | ACTC1     | ACTC1     | ACTC1     |
| hsa-miR-32  | ADCY3     | ADCY3     | ADCY3     |
| hsa-miR-32  | ADM       | ADM       | ADM       |
| hsa-miR-32  | ADRB1     | ADRB1     | ADRB1     |
| hsa-miR-32  | ANK3      | ANK3      | ANK3      |
| hsa-miR-32  | ANP32E    | ANP32E    | ANP32E    |
| hsa-miR-32  | ARHGEF10  | ARHGEF10  | ARHGEF10  |
| hsa-miR-32  | ARHGEF17  | ARHGEF17  | ARHGEF17  |
| hsa-miR-32  | ARID1B    | ARID1B    | ARID1B    |
| hsa-miR-32  | ATP6V1B2  | ATP6V1B2  | ATP6V1B2  |
| hsa-miR-32  | AURKA     | AURKA     | AURKA     |
| hsa-miR-32  | BCAT2     | BCAT2     | BCAT2     |
| hsa-miR-32  | BMPR2     | BMPR2     | BMPR2     |
| hsa-miR-32  | C11orf24  | C11orf24  | C11orf24  |
| hsa-miR-32  | C20orf112 | C20orf112 | C20orf112 |
| hsa-miR-32  | C6orf62   | C6orf62   | C6orf62   |
| hsa-miR-32  | C9orf150  | C9orf150  | C9orf150  |
| hsa-miR-32  | CBLN4     | CBLN4     | CBLN4     |
| hsa-miR-32  | CD69      | CD69      | CD69      |
| hsa-miR-32  | CDC42     | CDC42     | CDC42     |
| hsa-miR-32  | CDKN1C    | CDKN1C    | CDKN1C    |
| hsa-miR-32  | CHRM5     | CHRM5     | CHRM5     |
| hsa-miR-32  | CHST1     | CHST1     | CHST1     |
| hsa-miR-32  | CHST7     | CHST7     | CHST7     |
| hsa-miR-32  | CIC       | CIC       | CIC       |
| hsa-miR-32  | COG3      | COG3      | COG3      |
| hsa-miR-32  | COL1A2    | COL1A2    | COL1A2    |
| hsa-miR-32  | CPEB2     | CPEB2     | CPEB2     |
| hsa-miR-32  | DKK3      | DKK3      | DKK3      |
| hsa-miR-32  | DNAJB9    | DNAJB9    | DNAJB9    |
| hsa-miR-32  | DOCK9     | DOCK9     | DOCK9     |
| hsa-miR-32  | DPP10     | DPP10     | DPP10     |
| hsa-miR-32  | DSCAML1   | DSCAML1   | DSCAML1   |
| hsa-miR-32  | DUS2L     | DUS2L     | DUS2L     |
| hsa-miR-32  | DUSP5     | DUSP5     | DUSP5     |
| hsa-miR-32  | E2F3      | E2F3      | E2F3      |
| hsa-miR-32  | EDEM1     | EDEM1     | EDEM1     |
| hsa-miR-32  | EOMES     | EOMES     | EOMES     |
| hsa-miR-32  | EPHA8     | EPHA8     | EPHA8     |
| hsa-miR-32  | FAM110B   | FAM110B   | FAM110B   |
| hsa-miR-32  | FBN1      | FBN1      | FBN1      |
| hsa-miR-32  | FOXP2     | FOXP2     | FOXP2     |
| hsa-miR-32  | FRY       | FRY       | FRY       |
| hsa-miR-32  | FXR1      | FXR1      | FXR1      |
| hsa-miR-32  | FZD10     | FZD10     | FZD10     |
| hsa-miR-32  | GAP43     | GAP43     | GAP43     |
| hsa-miR-32  | GDF11     | GDF11     | GDF11     |
| hsa-miR-32  | GFPT2     | GFPT2     | GFPT2     |

|            |          |          |          |
|------------|----------|----------|----------|
| hsa-miR-32 | GPR137C  | GPR137C  | GPR137C  |
| hsa-miR-32 | GRAMD1B  | GRAMD1B  | GRAMD1B  |
| hsa-miR-32 | GRAMD3   | GRAMD3   | GRAMD3   |
| hsa-miR-32 | GRHL1    | GRHL1    | GRHL1    |
| hsa-miR-32 | GRIA1    | GRIA1    | GRIA1    |
| hsa-miR-32 | GRIA3    | GRIA3    | GRIA3    |
| hsa-miR-32 | HCN2     | HCN2     | HCN2     |
| hsa-miR-32 | HERC2    | HERC2    | HERC2    |
| hsa-miR-32 | HERPUD2  | HERPUD2  | HERPUD2  |
| hsa-miR-32 | HIVEP1   | HIVEP1   | HIVEP1   |
| hsa-miR-32 | HOXD10   | HOXD10   | HOXD10   |
| hsa-miR-32 | IBTK     | IBTK     | IBTK     |
| hsa-miR-32 | IDH1     | IDH1     | IDH1     |
| hsa-miR-32 | ITGA5    | ITGA5    | ITGA5    |
| hsa-miR-32 | ITM2B    | ITM2B    | ITM2B    |
| hsa-miR-32 | ITPR1    | ITPR1    | ITPR1    |
| hsa-miR-32 | KCNJ3    | KCNJ3    | KCNJ3    |
| hsa-miR-32 | KIAA1109 | KIAA1109 | KIAA1109 |
| hsa-miR-32 | KIAA1279 | KIAA1279 | KIAA1279 |
| hsa-miR-32 | KIF5B    | KIF5B    | KIF5B    |
| hsa-miR-32 | KLF2     | KLF2     | KLF2     |
| hsa-miR-32 | KLF4     | KLF4     | KLF4     |
| hsa-miR-32 | KLF6     | KLF6     | KLF6     |
| hsa-miR-32 | LAMP2    | LAMP2    | LAMP2    |
| hsa-miR-32 | LBX1     | LBX1     | LBX1     |
| hsa-miR-32 | LEPREL2  | LEPREL2  | LEPREL2  |
| hsa-miR-32 | LMBR1L   | LMBR1L   | LMBR1L   |
| hsa-miR-32 | LMO2     | LMO2     | LMO2     |
| hsa-miR-32 | MAN2A1   | MAN2A1   | MAN2A1   |
| hsa-miR-32 | MCOLN2   | MCOLN2   | MCOLN2   |
| hsa-miR-32 | MIA3     | MIA3     | MIA3     |
| hsa-miR-32 | MORC3    | MORC3    | MORC3    |
| hsa-miR-32 | MPP1     | MPP1     | MPP1     |
| hsa-miR-32 | MTF2     | MTF2     | MTF2     |
| hsa-miR-32 | MYCBP2   | MYCBP2   | MYCBP2   |
| hsa-miR-32 | MYO1B    | MYO1B    | MYO1B    |
| hsa-miR-32 | NEFH     | NEFH     | NEFH     |
| hsa-miR-32 | NEFL     | NEFL     | NEFL     |
| hsa-miR-32 | NEFM     | NEFM     | NEFM     |
| hsa-miR-32 | NETO1    | NETO1    | NETO1    |
| hsa-miR-32 | NFIA     | NFIA     | NFIA     |
| hsa-miR-32 | NKX2-3   | NKX2-3   | NKX2-3   |
| hsa-miR-32 | NKX2-4   | NKX2-4   | NKX2-4   |
| hsa-miR-32 | NOX4     | NOX4     | NOX4     |
| hsa-miR-32 | NPTN     | NPTN     | NPTN     |
| hsa-miR-32 | NRF1     | NRF1     | NRF1     |
| hsa-miR-32 | NSMAF    | NSMAF    | NSMAF    |
| hsa-miR-32 | OAZ3     | OAZ3     | OAZ3     |
| hsa-miR-32 | PAX3     | PAX3     | PAX3     |
| hsa-miR-32 | PAX9     | PAX9     | PAX9     |
| hsa-miR-32 | PCDH11X  | PCDH11X  | PCDH11X  |



|            |          |          |          |
|------------|----------|----------|----------|
| hsa-miR-32 | PCOLCE2  | PCOLCE2  | PCOLCE2  |
| hsa-miR-32 | PDE8A    | PDE8A    | PDE8A    |
| hsa-miR-32 | PGAM1    | PGAM1    | PGAM1    |
| hsa-miR-32 | PLEKHG3  | PLEKHG3  | PLEKHG3  |
| hsa-miR-32 | POLK     | POLK     | POLK     |
| hsa-miR-32 | PPCS     | PPCS     | PPCS     |
| hsa-miR-32 | PPP1R12C | PPP1R12C | PPP1R12C |
| hsa-miR-32 | PSMD14   | PSMD14   | PSMD14   |
| hsa-miR-32 | RAB14    | RAB14    | RAB14    |
| hsa-miR-32 | RAB23    | RAB23    | RAB23    |
| hsa-miR-32 | RAD21    | RAD21    | RAD21    |
| hsa-miR-32 | RANBP9   | RANBP9   | RANBP9   |
| hsa-miR-32 | RBBP6    | RBBP6    | RBBP6    |
| hsa-miR-32 | REV3L    | REV3L    | REV3L    |
| hsa-miR-32 | RFX1     | RFX1     | RFX1     |
| hsa-miR-32 | RGS17    | RGS17    | RGS17    |
| hsa-miR-32 | RGS3     | RGS3     | RGS3     |
| hsa-miR-32 | RHPN2    | RHPN2    | RHPN2    |
| hsa-miR-32 | RNF180   | RNF180   | RNF180   |
| hsa-miR-32 | RYR3     | RYR3     | RYR3     |
| hsa-miR-32 | SEC31B   | SEC31B   | SEC31B   |
| hsa-miR-32 | SERTAD3  | SERTAD3  | SERTAD3  |
| hsa-miR-32 | SESN3    | SESN3    | SESN3    |
| hsa-miR-32 | SETD5    | SETD5    | SETD5    |
| hsa-miR-32 | SHOX     | SHOX     | SHOX     |
| hsa-miR-32 | SLC32A1  | SLC32A1  | SLC32A1  |
| hsa-miR-32 | SLC39A6  | SLC39A6  | SLC39A6  |
| hsa-miR-32 | SLC9A1   | SLC9A1   | SLC9A1   |
| hsa-miR-32 | SMAD6    | SMAD6    | SMAD6    |
| hsa-miR-32 | SMAD7    | SMAD7    | SMAD7    |
| hsa-miR-32 | SNX13    | SNX13    | SNX13    |
| hsa-miR-32 | SPOCK2   | SPOCK2   | SPOCK2   |
| hsa-miR-32 | SRPR     | SRPR     | SRPR     |
| hsa-miR-32 | SSFA2    | SSFA2    | SSFA2    |
| hsa-miR-32 | STRN3    | STRN3    | STRN3    |
| hsa-miR-32 | SYNJ1    | SYNJ1    | SYNJ1    |
| hsa-miR-32 | TACC2    | TACC2    | TACC2    |
| hsa-miR-32 | TAF15    | TAF15    | TAF15    |
| hsa-miR-32 | TAGAP    | TAGAP    | TAGAP    |
| hsa-miR-32 | TBC1D8   | TBC1D8   | TBC1D8   |
| hsa-miR-32 | TFAP2E   | TFAP2E   | TFAP2E   |
| hsa-miR-32 | TGIF1    | TGIF1    | TGIF1    |
| hsa-miR-32 | TIA1     | TIA1     | TIA1     |
| hsa-miR-32 | TMEM188  | TMEM188  | TMEM188  |
| hsa-miR-32 | TMF1     | TMF1     | TMF1     |
| hsa-miR-32 | TOB1     | TOB1     | TOB1     |
| hsa-miR-32 | TPM4     | TPM4     | TPM4     |
| hsa-miR-32 | TRIO     | TRIO     | TRIO     |
| hsa-miR-32 | TSGA14   | TSGA14   | TSGA14   |
| hsa-miR-32 | UGP2     | UGP2     | UGP2     |
| hsa-miR-32 | USP28    | USP28    | USP28    |

|                |           |           |           |
|----------------|-----------|-----------|-----------|
| hsa-miR-32     | USP44     | USP44     | USP44     |
| hsa-miR-32     | VPS54     | VPS54     | VPS54     |
| hsa-miR-32     | WRNIP1    | WRNIP1    | WRNIP1    |
| hsa-miR-32     | XYLT2     | XYLT2     | XYLT2     |
| hsa-miR-32     | ZFHX4     | ZFHX4     | ZFHX4     |
| hsa-miR-32     | ZFYVE21   | ZFYVE21   | ZFYVE21   |
| hsa-miR-32     | ZNF287    | ZNF287    | ZNF287    |
| hsa-miR-329    | AHNAK     | AHNAK     | AHNAK     |
| hsa-miR-329    | ATXN1     | ATXN1     | ATXN1     |
| hsa-miR-329    | BAIAP3    | BAIAP3    | BAIAP3    |
| hsa-miR-329    | BLCAP     | BLCAP     | BLCAP     |
| hsa-miR-329    | C2orf53   | C2orf53   | C2orf53   |
| hsa-miR-329    | C9orf25   | C9orf25   | C9orf25   |
| hsa-miR-329    | CAPZB     | CAPZB     | CAPZB     |
| hsa-miR-329    | CBX1      | CBX1      | CBX1      |
| hsa-miR-329    | CDKN2D    | CDKN2D    | CDKN2D    |
| hsa-miR-329    | CLTB      | CLTB      | CLTB      |
| hsa-miR-329    | CRMP1     | CRMP1     | CRMP1     |
| hsa-miR-329    | CUL2      | CUL2      | CUL2      |
| hsa-miR-329    | DLGAP4    | DLGAP4    | DLGAP4    |
| hsa-miR-329    | DUSP10    | DUSP10    | DUSP10    |
| hsa-miR-329    | E2F1      | E2F1      | E2F1      |
| hsa-miR-329    | ERH       | ERH       | ERH       |
| hsa-miR-329    | FXR2      | FXR2      | FXR2      |
| hsa-miR-329    | GRB2      | GRB2      | GRB2      |
| hsa-miR-329    | GRIPAP1   | GRIPAP1   | GRIPAP1   |
| hsa-miR-329    | HOXC10    | HOXC10    | HOXC10    |
| hsa-miR-329    | ITPR1     | ITPR1     | ITPR1     |
| hsa-miR-329    | LHX9      | LHX9      | LHX9      |
| hsa-miR-329    | NAV3      | NAV3      | NAV3      |
| hsa-miR-329    | PAM       | PAM       | PAM       |
| hsa-miR-329    | PHB       | PHB       | PHB       |
| hsa-miR-329    | PRR7      | PRR7      | PRR7      |
| hsa-miR-329    | RBM39     | RBM39     | RBM39     |
| hsa-miR-329    | RPE       | RPE       | RPE       |
| hsa-miR-329    | SHB       | SHB       | SHB       |
| hsa-miR-329    | SOX17     | SOX17     | SOX17     |
| hsa-miR-329    | SSX2IP    | SSX2IP    | SSX2IP    |
| hsa-miR-329    | THRA      | THRA      | THRA      |
| hsa-miR-329    | TNFAIP8L3 | TNFAIP8L3 | TNFAIP8L3 |
| hsa-miR-329    | WNT3      | WNT3      | WNT3      |
| hsa-miR-329    | ZC3H10    | ZC3H10    | ZC3H10    |
| hsa-miR-329    | ZDHHC5    | ZDHHC5    | ZDHHC5    |
| hsa-miR-329    | ZFHX4     | ZFHX4     | ZFHX4     |
| hsa-miR-337-3p | ABCD3     | ABCD3     | ABCD3     |
| hsa-miR-337-3p | ABI3BP    | ABI3BP    | ABI3BP    |
| hsa-miR-337-3p | ADAM22    | ADAM22    | ADAM22    |
| hsa-miR-337-3p | ADK       | ADK       | ADK       |

|                |          |          |          |
|----------------|----------|----------|----------|
| hsa-miR-337-3p | ALKBH8   | ALKBH8   | ALKBH8   |
| hsa-miR-337-3p | ANP32E   | ANP32E   | ANP32E   |
| hsa-miR-337-3p | APP      | APP      | APP      |
| hsa-miR-337-3p | ARID4B   | ARID4B   | ARID4B   |
| hsa-miR-337-3p | ARMC7    | ARMC7    | ARMC7    |
| hsa-miR-337-3p | ATXN7L1  | ATXN7L1  | ATXN7L1  |
| hsa-miR-337-3p | BAP1     | BAP1     | BAP1     |
| hsa-miR-337-3p | BASP1    | BASP1    | BASP1    |
| hsa-miR-337-3p | BCL11A   | BCL11A   | BCL11A   |
| hsa-miR-337-3p | BTN1A1   | BTN1A1   | BTN1A1   |
| hsa-miR-337-3p | BTN3A1   | BTN3A1   | BTN3A1   |
| hsa-miR-337-3p | C11orf16 | C11orf16 | C11orf16 |
| hsa-miR-337-3p | CA2      | CA2      | CA2      |
| hsa-miR-337-3p | CA5B     | CA5B     | CA5B     |
| hsa-miR-337-3p | CBR4     | CBR4     | CBR4     |
| hsa-miR-337-3p | CCRL1    | CCRL1    | CCRL1    |
| hsa-miR-337-3p | CD38     | CD38     | CD38     |
| hsa-miR-337-3p | CDC14A   | CDC14A   | CDC14A   |
| hsa-miR-337-3p | CEPT1    | CEPT1    | CEPT1    |
| hsa-miR-337-3p | CFLAR    | CFLAR    | CFLAR    |
| hsa-miR-337-3p | CNIH3    | CNIH3    | CNIH3    |
| hsa-miR-337-3p | CNOT1    | CNOT1    | CNOT1    |
| hsa-miR-337-3p | COL4A1   | COL4A1   | COL4A1   |
| hsa-miR-337-3p | COMMD10  | COMMD10  | COMMD10  |
| hsa-miR-337-3p | CSTF1    | CSTF1    | CSTF1    |
| hsa-miR-337-3p | CYLC2    | CYLC2    | CYLC2    |
| hsa-miR-337-3p | DCHS2    | DCHS2    | DCHS2    |
| hsa-miR-337-3p | DDR1     | DDR1     | DDR1     |

|                |          |          |          |
|----------------|----------|----------|----------|
| hsa-miR-337-3p | DMC1     | DMC1     | DMC1     |
| hsa-miR-337-3p | DOCK8    | DOCK8    | DOCK8    |
| hsa-miR-337-3p | EI24     | EI24     | EI24     |
| hsa-miR-337-3p | EIF2C2   | EIF2C2   | EIF2C2   |
| hsa-miR-337-3p | EIF2C3   | EIF2C3   | EIF2C3   |
| hsa-miR-337-3p | ELF1     | ELF1     | ELF1     |
| hsa-miR-337-3p | EMP2     | EMP2     | EMP2     |
| hsa-miR-337-3p | EXTL2    | EXTL2    | EXTL2    |
| hsa-miR-337-3p | FAM117A  | FAM117A  | FAM117A  |
| hsa-miR-337-3p | FOXP1    | FOXP1    | FOXP1    |
| hsa-miR-337-3p | FRAS1    | FRAS1    | FRAS1    |
| hsa-miR-337-3p | GBP5     | GBP5     | GBP5     |
| hsa-miR-337-3p | GPRIN3   | GPRIN3   | GPRIN3   |
| hsa-miR-337-3p | GRIA3    | GRIA3    | GRIA3    |
| hsa-miR-337-3p | HDDC2    | HDDC2    | HDDC2    |
| hsa-miR-337-3p | HKDC1    | HKDC1    | HKDC1    |
| hsa-miR-337-3p | HOXB7    | HOXB7    | HOXB7    |
| hsa-miR-337-3p | HSPA2    | HSPA2    | HSPA2    |
| hsa-miR-337-3p | IARS2    | IARS2    | IARS2    |
| hsa-miR-337-3p | IER3IP1  | IER3IP1  | IER3IP1  |
| hsa-miR-337-3p | ING3     | ING3     | ING3     |
| hsa-miR-337-3p | INTU     | INTU     | INTU     |
| hsa-miR-337-3p | IVL      | IVL      | IVL      |
| hsa-miR-337-3p | KIAA1274 | KIAA1274 | KIAA1274 |
| hsa-miR-337-3p | KLRC1    | KLRC1    | KLRC1    |
| hsa-miR-337-3p | KLRC2    | KLRC2    | KLRC2    |
| hsa-miR-337-3p | KMO      | KMO      | KMO      |
| hsa-miR-337-3p | LHFP     | LHFP     | LHFP     |

|                |         |         |         |
|----------------|---------|---------|---------|
| hsa-miR-337-3p | LPP     | LPP     | LPP     |
| hsa-miR-337-3p | LRRC1   | LRRC1   | LRRC1   |
| hsa-miR-337-3p | LRRC2   | LRRC2   | LRRC2   |
| hsa-miR-337-3p | MARK1   | MARK1   | MARK1   |
| hsa-miR-337-3p | MET     | MET     | MET     |
| hsa-miR-337-3p | MKX     | MKX     | MKX     |
| hsa-miR-337-3p | MMP20   | MMP20   | MMP20   |
| hsa-miR-337-3p | MNAT1   | MNAT1   | MNAT1   |
| hsa-miR-337-3p | MOBP    | MOBP    | MOBP    |
| hsa-miR-337-3p | MTM1    | MTM1    | MTM1    |
| hsa-miR-337-3p | NKX2-8  | NKX2-8  | NKX2-8  |
| hsa-miR-337-3p | NOX1    | NOX1    | NOX1    |
| hsa-miR-337-3p | NRG2    | NRG2    | NRG2    |
| hsa-miR-337-3p | NRIP2   | NRIP2   | NRIP2   |
| hsa-miR-337-3p | NRN1    | NRN1    | NRN1    |
| hsa-miR-337-3p | NSMAF   | NSMAF   | NSMAF   |
| hsa-miR-337-3p | OXCT1   | OXCT1   | OXCT1   |
| hsa-miR-337-3p | OXTR    | OXTR    | OXTR    |
| hsa-miR-337-3p | PCGF2   | PCGF2   | PCGF2   |
| hsa-miR-337-3p | PCGF5   | PCGF5   | PCGF5   |
| hsa-miR-337-3p | PDHX    | PDHX    | PDHX    |
| hsa-miR-337-3p | PHACTR1 | PHACTR1 | PHACTR1 |
| hsa-miR-337-3p | PLEKHA8 | PLEKHA8 | PLEKHA8 |
| hsa-miR-337-3p | PLS3    | PLS3    | PLS3    |
| hsa-miR-337-3p | POLR1D  | POLR1D  | POLR1D  |
| hsa-miR-337-3p | PPHLN1  | PPHLN1  | PPHLN1  |
| hsa-miR-337-3p | PPP3R2  | PPP3R2  | PPP3R2  |
| hsa-miR-337-3p | PSIP1   | PSIP1   | PSIP1   |

|                |         |         |         |
|----------------|---------|---------|---------|
| hsa-miR-337-3p | PTCH1   | PTCH1   | PTCH1   |
| hsa-miR-337-3p | RAP1A   | RAP1A   | RAP1A   |
| hsa-miR-337-3p | RARRES1 | RARRES1 | RARRES1 |
| hsa-miR-337-3p | RBAK    | RBAK    | RBAK    |
| hsa-miR-337-3p | RBM18   | RBM18   | RBM18   |
| hsa-miR-337-3p | RBM25   | RBM25   | RBM25   |
| hsa-miR-337-3p | RBM39   | RBM39   | RBM39   |
| hsa-miR-337-3p | RBM41   | RBM41   | RBM41   |
| hsa-miR-337-3p | RPUSD2  | RPUSD2  | RPUSD2  |
| hsa-miR-337-3p | RSAD1   | RSAD1   | RSAD1   |
| hsa-miR-337-3p | SART3   | SART3   | SART3   |
| hsa-miR-337-3p | SASS6   | SASS6   | SASS6   |
| hsa-miR-337-3p | SCD5    | SCD5    | SCD5    |
| hsa-miR-337-3p | SEL1L   | SEL1L   | SEL1L   |
| hsa-miR-337-3p | SOCS2   | SOCS2   | SOCS2   |
| hsa-miR-337-3p | SP5     | SP5     | SP5     |
| hsa-miR-337-3p | SPIRE1  | SPIRE1  | SPIRE1  |
| hsa-miR-337-3p | SULT1C2 | SULT1C2 | SULT1C2 |
| hsa-miR-337-3p | SURF4   | SURF4   | SURF4   |
| hsa-miR-337-3p | SYCP2   | SYCP2   | SYCP2   |
| hsa-miR-337-3p | SYN3    | SYN3    | SYN3    |
| hsa-miR-337-3p | TANK    | TANK    | TANK    |
| hsa-miR-337-3p | TBC1D13 | TBC1D13 | TBC1D13 |
| hsa-miR-337-3p | TFEC    | TFEC    | TFEC    |
| hsa-miR-337-3p | TIMM22  | TIMM22  | TIMM22  |
| hsa-miR-337-3p | TMEM35  | TMEM35  | TMEM35  |
| hsa-miR-337-3p | TMLHE   | TMLHE   | TMLHE   |
| hsa-miR-337-3p | TNFAIP6 | TNFAIP6 | TNFAIP6 |

|                |        |        |        |
|----------------|--------|--------|--------|
| hsa-miR-337-3p | TRPM7  | TRPM7  | TRPM7  |
| hsa-miR-337-3p | TRPM8  | TRPM8  | TRPM8  |
| hsa-miR-337-3p | TTC25  | TTC25  | TTC25  |
| hsa-miR-337-3p | UBAP2L | UBAP2L | UBAP2L |
| hsa-miR-337-3p | UNC5CL | UNC5CL | UNC5CL |
| hsa-miR-337-3p | USP15  | USP15  | USP15  |
| hsa-miR-337-3p | USP38  | USP38  | USP38  |
| hsa-miR-337-3p | VASH2  | VASH2  | VASH2  |
| hsa-miR-337-3p | VIM    | VIM    | VIM    |
| hsa-miR-337-3p | VPS37A | VPS37A | VPS37A |
| hsa-miR-337-3p | VTA1   | VTA1   | VTA1   |
| hsa-miR-337-3p | WIPI1  | WIPI1  | WIPI1  |
| hsa-miR-337-3p | WNT10A | WNT10A | WNT10A |
| hsa-miR-337-3p | WNT5A  | WNT5A  | WNT5A  |
| hsa-miR-337-3p | ZBTB10 | ZBTB10 | ZBTB10 |
| hsa-miR-337-3p | ZNF131 | ZNF131 | ZNF131 |
| hsa-miR-337-3p | ZNF142 | ZNF142 | ZNF142 |
| hsa-miR-337-3p | ZNF181 | ZNF181 | ZNF181 |
| hsa-miR-337-3p | ZNF233 | ZNF233 | ZNF233 |
| hsa-miR-337-3p | ZNF25  | ZNF25  | ZNF25  |
| hsa-miR-337-3p | ZNF302 | ZNF302 | ZNF302 |
| hsa-miR-337-3p | ZNF548 | ZNF548 | ZNF548 |
| hsa-miR-337-3p | ZNF615 | ZNF615 | ZNF615 |
| hsa-miR-337-3p | ZNF69  | ZNF69  | ZNF69  |
| hsa-miR-337-3p | ZNF704 | ZNF704 | ZNF704 |
| hsa-miR-345    | ABCA6  | ABCA6  | ABCA6  |
| hsa-miR-345    | ABCC1  | ABCC1  | ABCC1  |
| hsa-miR-345    | ABT1   | ABT1   | ABT1   |
| hsa-miR-345    | ACAT1  | ACAT1  | ACAT1  |
| hsa-miR-345    | ACTR1B | ACTR1B | ACTR1B |

|             |          |          |          |
|-------------|----------|----------|----------|
| hsa-miR-345 | ADAM8    | ADAM8    | ADAM8    |
| hsa-miR-345 | ADRA1A   | ADRA1A   | ADRA1A   |
| hsa-miR-345 | AHI1     | AHI1     | AHI1     |
| hsa-miR-345 | ANKRD58  | ANKRD58  | ANKRD58  |
| hsa-miR-345 | APH1A    | APH1A    | APH1A    |
| hsa-miR-345 | APOO     | APOO     | APOO     |
| hsa-miR-345 | ARHGAP6  | ARHGAP6  | ARHGAP6  |
| hsa-miR-345 | ARL14    | ARL14    | ARL14    |
| hsa-miR-345 | ARPC1B   | ARPC1B   | ARPC1B   |
| hsa-miR-345 | ARRDC2   | ARRDC2   | ARRDC2   |
| hsa-miR-345 | ATG4A    | ATG4A    | ATG4A    |
| hsa-miR-345 | ATP6V1B2 | ATP6V1B2 | ATP6V1B2 |
| hsa-miR-345 | B3GAT3   | B3GAT3   | B3GAT3   |
| hsa-miR-345 | BBS4     | BBS4     | BBS4     |
| hsa-miR-345 | BLNK     | BLNK     | BLNK     |
| hsa-miR-345 | BRMS1    | BRMS1    | BRMS1    |
| hsa-miR-345 | BST1     | BST1     | BST1     |
| hsa-miR-345 | BTN2A1   | BTN2A1   | BTN2A1   |
| hsa-miR-345 | C17orf81 | C17orf81 | C17orf81 |
| hsa-miR-345 | C1orf106 | C1orf106 | C1orf106 |
| hsa-miR-345 | CC2D1B   | CC2D1B   | CC2D1B   |
| hsa-miR-345 | CCBL2    | CCBL2    | CCBL2    |
| hsa-miR-345 | CCDC36   | CCDC36   | CCDC36   |
| hsa-miR-345 | CCDC43   | CCDC43   | CCDC43   |
| hsa-miR-345 | CCDC78   | CCDC78   | CCDC78   |
| hsa-miR-345 | CCL8     | CCL8     | CCL8     |
| hsa-miR-345 | CDA      | CDA      | CDA      |
| hsa-miR-345 | CDIPT    | CDIPT    | CDIPT    |
| hsa-miR-345 | CDKN1A   | CDKN1A   | CDKN1A   |
| hsa-miR-345 | CHID1    | CHID1    | CHID1    |
| hsa-miR-345 | CILP2    | CILP2    | CILP2    |
| hsa-miR-345 | CLPB     | CLPB     | CLPB     |
| hsa-miR-345 | COL6A3   | COL6A3   | COL6A3   |
| hsa-miR-345 | COPS6    | COPS6    | COPS6    |
| hsa-miR-345 | CPXCR1   | CPXCR1   | CPXCR1   |
| hsa-miR-345 | CRISP3   | CRISP3   | CRISP3   |
| hsa-miR-345 | CTCF     | CTCF     | CTCF     |
| hsa-miR-345 | DHCR24   | DHCR24   | DHCR24   |
| hsa-miR-345 | DHRS13   | DHRS13   | DHRS13   |
| hsa-miR-345 | DLL3     | DLL3     | DLL3     |
| hsa-miR-345 | DUSP18   | DUSP18   | DUSP18   |
| hsa-miR-345 | E2F6     | E2F6     | E2F6     |
| hsa-miR-345 | ELOVL5   | ELOVL5   | ELOVL5   |
| hsa-miR-345 | EML2     | EML2     | EML2     |
| hsa-miR-345 | EPDR1    | EPDR1    | EPDR1    |
| hsa-miR-345 | EXT2     | EXT2     | EXT2     |
| hsa-miR-345 | FAM38B   | FAM38B   | FAM38B   |
| hsa-miR-345 | FAM3D    | FAM3D    | FAM3D    |
| hsa-miR-345 | FAM57B   | FAM57B   | FAM57B   |
| hsa-miR-345 | FAM65A   | FAM65A   | FAM65A   |
| hsa-miR-345 | FAM71C   | FAM71C   | FAM71C   |



|             |          |          |          |
|-------------|----------|----------|----------|
| hsa-miR-345 | FBLN5    | FBLN5    | FBLN5    |
| hsa-miR-345 | FBXO16   | FBXO16   | FBXO16   |
| hsa-miR-345 | FGF11    | FGF11    | FGF11    |
| hsa-miR-345 | FRMD6    | FRMD6    | FRMD6    |
| hsa-miR-345 | GABBR2   | GABBR2   | GABBR2   |
| hsa-miR-345 | GABRA2   | GABRA2   | GABRA2   |
| hsa-miR-345 | GAL      | GAL      | GAL      |
| hsa-miR-345 | GATAD1   | GATAD1   | GATAD1   |
| hsa-miR-345 | GLP1R    | GLP1R    | GLP1R    |
| hsa-miR-345 | GON4L    | GON4L    | GON4L    |
| hsa-miR-345 | GPATCH4  | GPATCH4  | GPATCH4  |
| hsa-miR-345 | GPR3     | GPR3     | GPR3     |
| hsa-miR-345 | GPR98    | GPR98    | GPR98    |
| hsa-miR-345 | GSTO1    | GSTO1    | GSTO1    |
| hsa-miR-345 | HDAC8    | HDAC8    | HDAC8    |
| hsa-miR-345 | HERC6    | HERC6    | HERC6    |
| hsa-miR-345 | HMGN1    | HMGN1    | HMGN1    |
| hsa-miR-345 | HSF1     | HSF1     | HSF1     |
| hsa-miR-345 | HTR4     | HTR4     | HTR4     |
| hsa-miR-345 | IDI1     | IDI1     | IDI1     |
| hsa-miR-345 | IDI2     | IDI2     | IDI2     |
| hsa-miR-345 | IL1F10   | IL1F10   | IL1F10   |
| hsa-miR-345 | INHBE    | INHBE    | INHBE    |
| hsa-miR-345 | KIAA1239 | KIAA1239 | KIAA1239 |
| hsa-miR-345 | KIAA1274 | KIAA1274 | KIAA1274 |
| hsa-miR-345 | KIAA1539 | KIAA1539 | KIAA1539 |
| hsa-miR-345 | KLK7     | KLK7     | KLK7     |
| hsa-miR-345 | KLRC1    | KLRC1    | KLRC1    |
| hsa-miR-345 | KLRC2    | KLRC2    | KLRC2    |
| hsa-miR-345 | KRT37    | KRT37    | KRT37    |
| hsa-miR-345 | LIG1     | LIG1     | LIG1     |
| hsa-miR-345 | LILRB1   | LILRB1   | LILRB1   |
| hsa-miR-345 | LOXL3    | LOXL3    | LOXL3    |
| hsa-miR-345 | LYRM1    | LYRM1    | LYRM1    |
| hsa-miR-345 | MBD2     | MBD2     | MBD2     |
| hsa-miR-345 | MED8     | MED8     | MED8     |
| hsa-miR-345 | MMP19    | MMP19    | MMP19    |
| hsa-miR-345 | MRPL36   | MRPL36   | MRPL36   |
| hsa-miR-345 | MUS81    | MUS81    | MUS81    |
| hsa-miR-345 | MYO1G    | MYO1G    | MYO1G    |
| hsa-miR-345 | MYOZ3    | MYOZ3    | MYOZ3    |
| hsa-miR-345 | NAPA     | NAPA     | NAPA     |
| hsa-miR-345 | NIF3L1   | NIF3L1   | NIF3L1   |
| hsa-miR-345 | NWD1     | NWD1     | NWD1     |
| hsa-miR-345 | OLFM3    | OLFM3    | OLFM3    |
| hsa-miR-345 | OTX2     | OTX2     | OTX2     |
| hsa-miR-345 | P2RX1    | P2RX1    | P2RX1    |
| hsa-miR-345 | P2RY6    | P2RY6    | P2RY6    |
| hsa-miR-345 | PCGF2    | PCGF2    | PCGF2    |
| hsa-miR-345 | PDE4B    | PDE4B    | PDE4B    |
| hsa-miR-345 | PDE4DIP  | PDE4DIP  | PDE4DIP  |

|             |          |          |          |
|-------------|----------|----------|----------|
| hsa-miR-345 | PHF12    | PHF12    | PHF12    |
| hsa-miR-345 | PLA2G12B | PLA2G12B | PLA2G12B |
| hsa-miR-345 | PMPCA    | PMPCA    | PMPCA    |
| hsa-miR-345 | POLD3    | POLD3    | POLD3    |
| hsa-miR-345 | PPIE     | PPIE     | PPIE     |
| hsa-miR-345 | PPP1R10  | PPP1R10  | PPP1R10  |
| hsa-miR-345 | PPP5C    | PPP5C    | PPP5C    |
| hsa-miR-345 | PPYR1    | PPYR1    | PPYR1    |
| hsa-miR-345 | PRPF3    | PRPF3    | PRPF3    |
| hsa-miR-345 | PRPSAP1  | PRPSAP1  | PRPSAP1  |
| hsa-miR-345 | PRSS8    | PRSS8    | PRSS8    |
| hsa-miR-345 | PTK2B    | PTK2B    | PTK2B    |
| hsa-miR-345 | PTPN4    | PTPN4    | PTPN4    |
| hsa-miR-345 | PTPRN    | PTPRN    | PTPRN    |
| hsa-miR-345 | RAD1     | RAD1     | RAD1     |
| hsa-miR-345 | RAD50    | RAD50    | RAD50    |
| hsa-miR-345 | RFC1     | RFC1     | RFC1     |
| hsa-miR-345 | RGS1     | RGS1     | RGS1     |
| hsa-miR-345 | RPA1     | RPA1     | RPA1     |
| hsa-miR-345 | S100B    | S100B    | S100B    |
| hsa-miR-345 | SAMD9    | SAMD9    | SAMD9    |
| hsa-miR-345 | SARS2    | SARS2    | SARS2    |
| hsa-miR-345 | SAT1     | SAT1     | SAT1     |
| hsa-miR-345 | SLBP     | SLBP     | SLBP     |
| hsa-miR-345 | SLC16A12 | SLC16A12 | SLC16A12 |
| hsa-miR-345 | SLC23A3  | SLC23A3  | SLC23A3  |
| hsa-miR-345 | SLC29A2  | SLC29A2  | SLC29A2  |
| hsa-miR-345 | SLC30A3  | SLC30A3  | SLC30A3  |
| hsa-miR-345 | SLC39A1  | SLC39A1  | SLC39A1  |
| hsa-miR-345 | SLC4A5   | SLC4A5   | SLC4A5   |
| hsa-miR-345 | SMCP     | SMCP     | SMCP     |
| hsa-miR-345 | SMS      | SMS      | SMS      |
| hsa-miR-345 | SORBS1   | SORBS1   | SORBS1   |
| hsa-miR-345 | SRI      | SRI      | SRI      |
| hsa-miR-345 | SSBP2    | SSBP2    | SSBP2    |
| hsa-miR-345 | STK16    | STK16    | STK16    |
| hsa-miR-345 | SULF2    | SULF2    | SULF2    |
| hsa-miR-345 | SUV420H1 | SUV420H1 | SUV420H1 |
| hsa-miR-345 | SYT6     | SYT6     | SYT6     |
| hsa-miR-345 | TBC1D10C | TBC1D10C | TBC1D10C |
| hsa-miR-345 | TEX9     | TEX9     | TEX9     |
| hsa-miR-345 | TFAP2E   | TFAP2E   | TFAP2E   |
| hsa-miR-345 | TGM1     | TGM1     | TGM1     |
| hsa-miR-345 | THY1     | THY1     | THY1     |
| hsa-miR-345 | TJP2     | TJP2     | TJP2     |
| hsa-miR-345 | TMEM139  | TMEM139  | TMEM139  |
| hsa-miR-345 | TMEM186  | TMEM186  | TMEM186  |
| hsa-miR-345 | TMEM44   | TMEM44   | TMEM44   |
| hsa-miR-345 | TMEM63B  | TMEM63B  | TMEM63B  |
| hsa-miR-345 | TRPM6    | TRPM6    | TRPM6    |
| hsa-miR-345 | TLL12    | TLL12    | TLL12    |

|             |           |           |           |
|-------------|-----------|-----------|-----------|
| hsa-miR-345 | UBAC2     | UBAC2     | UBAC2     |
| hsa-miR-345 | UNC45A    | UNC45A    | UNC45A    |
| hsa-miR-345 | UPF3A     | UPF3A     | UPF3A     |
| hsa-miR-345 | ZNF133    | ZNF133    | ZNF133    |
| hsa-miR-345 | ZNF259    | ZNF259    | ZNF259    |
| hsa-miR-345 | ZNF434    | ZNF434    | ZNF434    |
| hsa-miR-345 | ZNF598    | ZNF598    | ZNF598    |
| hsa-miR-345 | ZSWIM1    | ZSWIM1    | ZSWIM1    |
| hsa-miR-345 | ZW10      | ZW10      | ZW10      |
| hsa-miR-34a | ACSL4     | ACSL4     | ACSL4     |
| hsa-miR-34a | ALDOA     | ALDOA     | ALDOA     |
| hsa-miR-34a | AMPD2     | AMPD2     | AMPD2     |
| hsa-miR-34a | ANK3      | ANK3      | ANK3      |
| hsa-miR-34a | APH1A     | APH1A     | APH1A     |
| hsa-miR-34a | AREG      | AREG      | AREG      |
| hsa-miR-34a | ASB1      | ASB1      | ASB1      |
| hsa-miR-34a | AXL       | AXL       | AXL       |
| hsa-miR-34a | B4GALT2   | B4GALT2   | B4GALT2   |
| hsa-miR-34a | C20orf134 | C20orf134 | C20orf134 |
| hsa-miR-34a | CACNB3    | CACNB3    | CACNB3    |
| hsa-miR-34a | CCDC135   | CCDC135   | CCDC135   |
| hsa-miR-34a | CDKN1C    | CDKN1C    | CDKN1C    |
| hsa-miR-34a | CHST12    | CHST12    | CHST12    |
| hsa-miR-34a | COPS7B    | COPS7B    | COPS7B    |
| hsa-miR-34a | CRHR1     | CRHR1     | CRHR1     |
| hsa-miR-34a | CUEDC1    | CUEDC1    | CUEDC1    |
| hsa-miR-34a | DBC1      | DBC1      | DBC1      |
| hsa-miR-34a | DDX17     | DDX17     | DDX17     |
| hsa-miR-34a | DHRS13    | DHRS13    | DHRS13    |
| hsa-miR-34a | DLL1      | DLL1      | DLL1      |
| hsa-miR-34a | DPYSL4    | DPYSL4    | DPYSL4    |
| hsa-miR-34a | EML5      | EML5      | EML5      |
| hsa-miR-34a | EVI5L     | EVI5L     | EVI5L     |
| hsa-miR-34a | FAT4      | FAT4      | FAT4      |
| hsa-miR-34a | FBXO10    | FBXO10    | FBXO10    |
| hsa-miR-34a | FBXO30    | FBXO30    | FBXO30    |
| hsa-miR-34a | FGD6      | FGD6      | FGD6      |
| hsa-miR-34a | FKBP1B    | FKBP1B    | FKBP1B    |
| hsa-miR-34a | FOSL1     | FOSL1     | FOSL1     |
| hsa-miR-34a | FUK       | FUK       | FUK       |
| hsa-miR-34a | FUT8      | FUT8      | FUT8      |
| hsa-miR-34a | GALNT7    | GALNT7    | GALNT7    |
| hsa-miR-34a | GDAP1L1   | GDAP1L1   | GDAP1L1   |
| hsa-miR-34a | GPR22     | GPR22     | GPR22     |
| hsa-miR-34a | HCN3      | HCN3      | HCN3      |
| hsa-miR-34a | HSPA1B    | HSPA1B    | HSPA1B    |
| hsa-miR-34a | IGSF1     | IGSF1     | IGSF1     |
| hsa-miR-34a | JAKMIP1   | JAKMIP1   | JAKMIP1   |
| hsa-miR-34a | JMJD1C    | JMJD1C    | JMJD1C    |
| hsa-miR-34a | LGR4      | LGR4      | LGR4      |
| hsa-miR-34a | LMBR1L    | LMBR1L    | LMBR1L    |

|             |          |          |          |
|-------------|----------|----------|----------|
| hsa-miR-34a | LMTK3    | LMTK3    | LMTK3    |
| hsa-miR-34a | MAPK13   | MAPK13   | MAPK13   |
| hsa-miR-34a | MARCKSL1 | MARCKSL1 | MARCKSL1 |
| hsa-miR-34a | MDM4     | MDM4     | MDM4     |
| hsa-miR-34a | MET      | MET      | MET      |
| hsa-miR-34a | MPP2     | MPP2     | MPP2     |
| hsa-miR-34a | MRPL52   | MRPL52   | MRPL52   |
| hsa-miR-34a | MYCN     | MYCN     | MYCN     |
| hsa-miR-34a | MYRIP    | MYRIP    | MYRIP    |
| hsa-miR-34a | NOS1AP   | NOS1AP   | NOS1AP   |
| hsa-miR-34a | NRIP3    | NRIP3    | NRIP3    |
| hsa-miR-34a | NRN1     | NRN1     | NRN1     |
| hsa-miR-34a | NUMBL    | NUMBL    | NUMBL    |
| hsa-miR-34a | PGM1     | PGM1     | PGM1     |
| hsa-miR-34a | PNOC     | PNOC     | PNOC     |
| hsa-miR-34a | PREB     | PREB     | PREB     |
| hsa-miR-34a | PRKCE    | PRKCE    | PRKCE    |
| hsa-miR-34a | RALGDS   | RALGDS   | RALGDS   |
| hsa-miR-34a | RALGPS2  | RALGPS2  | RALGPS2  |
| hsa-miR-34a | RPS6KA4  | RPS6KA4  | RPS6KA4  |
| hsa-miR-34a | RRAS     | RRAS     | RRAS     |
| hsa-miR-34a | SDK2     | SDK2     | SDK2     |
| hsa-miR-34a | SEMA4C   | SEMA4C   | SEMA4C   |
| hsa-miR-34a | SGPP1    | SGPP1    | SGPP1    |
| hsa-miR-34a | SHKBP1   | SHKBP1   | SHKBP1   |
| hsa-miR-34a | SIRT6    | SIRT6    | SIRT6    |
| hsa-miR-34a | SLC31A2  | SLC31A2  | SLC31A2  |
| hsa-miR-34a | SLCO3A1  | SLCO3A1  | SLCO3A1  |
| hsa-miR-34a | SNX15    | SNX15    | SNX15    |
| hsa-miR-34a | STRN3    | STRN3    | STRN3    |
| hsa-miR-34a | SURF4    | SURF4    | SURF4    |
| hsa-miR-34a | SYVN1    | SYVN1    | SYVN1    |
| hsa-miR-34a | TAF5     | TAF5     | TAF5     |
| hsa-miR-34a | TMEM109  | TMEM109  | TMEM109  |
| hsa-miR-34a | TMEM55A  | TMEM55A  | TMEM55A  |
| hsa-miR-34a | TRIM41   | TRIM41   | TRIM41   |
| hsa-miR-34a | UHRF2    | UHRF2    | UHRF2    |
| hsa-miR-34a | VPS37B   | VPS37B   | VPS37B   |
| hsa-miR-34a | ZCCHC17  | ZCCHC17  | ZCCHC17  |
| hsa-miR-34a | ZDHHC16  | ZDHHC16  | ZDHHC16  |
| hsa-miR-34a | ZIC5     | ZIC5     | ZIC5     |
| hsa-miR-34a | ZNF281   | ZNF281   | ZNF281   |
| hsa-miR-370 | ACCN4    | ACCN4    | ACCN4    |
| hsa-miR-370 | ANGPTL6  | ANGPTL6  | ANGPTL6  |
| hsa-miR-370 | ANK3     | ANK3     | ANK3     |
| hsa-miR-370 | ATP1A2   | ATP1A2   | ATP1A2   |
| hsa-miR-370 | BCL2L11  | BCL2L11  | BCL2L11  |
| hsa-miR-370 | CCL21    | CCL21    | CCL21    |
| hsa-miR-370 | CIT      | CIT      | CIT      |
| hsa-miR-370 | CNGB1    | CNGB1    | CNGB1    |
| hsa-miR-370 | CRLF1    | CRLF1    | CRLF1    |

|              |          |          |          |
|--------------|----------|----------|----------|
| hsa-miR-370  | DHX35    | DHX35    | DHX35    |
| hsa-miR-370  | DMRTB1   | DMRTB1   | DMRTB1   |
| hsa-miR-370  | DNAJB1   | DNAJB1   | DNAJB1   |
| hsa-miR-370  | ENG      | ENG      | ENG      |
| hsa-miR-370  | FBR5     | FBR5     | FBR5     |
| hsa-miR-370  | GPR62    | GPR62    | GPR62    |
| hsa-miR-370  | HTR4     | HTR4     | HTR4     |
| hsa-miR-370  | ING3     | ING3     | ING3     |
| hsa-miR-370  | IVD      | IVD      | IVD      |
| hsa-miR-370  | KCNJ11   | KCNJ11   | KCNJ11   |
| hsa-miR-370  | KLC2     | KLC2     | KLC2     |
| hsa-miR-370  | KRT80    | KRT80    | KRT80    |
| hsa-miR-370  | KRTCAP3  | KRTCAP3  | KRTCAP3  |
| hsa-miR-370  | MTL5     | MTL5     | MTL5     |
| hsa-miR-370  | NARS     | NARS     | NARS     |
| hsa-miR-370  | PIGU     | PIGU     | PIGU     |
| hsa-miR-370  | POLR2F   | POLR2F   | POLR2F   |
| hsa-miR-370  | RALY     | RALY     | RALY     |
| hsa-miR-370  | SENP5    | SENP5    | SENP5    |
| hsa-miR-370  | SPRYD3   | SPRYD3   | SPRYD3   |
| hsa-miR-370  | ST3GAL3  | ST3GAL3  | ST3GAL3  |
| hsa-miR-370  | TM9SF4   | TM9SF4   | TM9SF4   |
| hsa-miR-370  | TRAIP    | TRAIP    | TRAIP    |
| hsa-miR-370  | TRPV2    | TRPV2    | TRPV2    |
| hsa-miR-370  | VDAC2    | VDAC2    | VDAC2    |
| hsa-miR-370  | WNT10B   | WNT10B   | WNT10B   |
| hsa-miR-370  | WNT7A    | WNT7A    | WNT7A    |
| hsa-miR-370  | ZMYM6    | ZMYM6    | ZMYM6    |
| hsa-miR-370  | ZNF219   | ZNF219   | ZNF219   |
| hsa-miR-376c | ADAMTSL1 | ADAMTSL1 | ADAMTSL1 |
| hsa-miR-376c | ALG6     | ALG6     | ALG6     |
| hsa-miR-376c | AMFR     | AMFR     | AMFR     |
| hsa-miR-376c | ANKRD10  | ANKRD10  | ANKRD10  |
| hsa-miR-376c | ARFGEF1  | ARFGEF1  | ARFGEF1  |
| hsa-miR-376c | ARID4A   | ARID4A   | ARID4A   |
| hsa-miR-376c | C18orf34 | C18orf34 | C18orf34 |
| hsa-miR-376c | C4orf19  | C4orf19  | C4orf19  |
| hsa-miR-376c | CACNA1G  | CACNA1G  | CACNA1G  |
| hsa-miR-376c | CALB1    | CALB1    | CALB1    |
| hsa-miR-376c | CASK     | CASK     | CASK     |
| hsa-miR-376c | CCDC91   | CCDC91   | CCDC91   |
| hsa-miR-376c | CCNT2    | CCNT2    | CCNT2    |
| hsa-miR-376c | CDY1     | CDY1     | CDY1     |
| hsa-miR-376c | CEP192   | CEP192   | CEP192   |
| hsa-miR-376c | CHIC1    | CHIC1    | CHIC1    |
| hsa-miR-376c | CLUL1    | CLUL1    | CLUL1    |
| hsa-miR-376c | CNIH2    | CNIH2    | CNIH2    |
| hsa-miR-376c | CREBBP   | CREBBP   | CREBBP   |
| hsa-miR-376c | DBX2     | DBX2     | DBX2     |
| hsa-miR-376c | DENND4A  | DENND4A  | DENND4A  |
| hsa-miR-376c | DLX1     | DLX1     | DLX1     |

|              |          |          |          |
|--------------|----------|----------|----------|
| hsa-miR-376c | DRD1     | DRD1     | DRD1     |
| hsa-miR-376c | DUSP11   | DUSP11   | DUSP11   |
| hsa-miR-376c | FGD4     | FGD4     | FGD4     |
| hsa-miR-376c | FNDC1    | FNDC1    | FNDC1    |
| hsa-miR-376c | GABRA1   | GABRA1   | GABRA1   |
| hsa-miR-376c | GRM3     | GRM3     | GRM3     |
| hsa-miR-376c | GRM6     | GRM6     | GRM6     |
| hsa-miR-376c | HBEGF    | HBEGF    | HBEGF    |
| hsa-miR-376c | HIVEP2   | HIVEP2   | HIVEP2   |
| hsa-miR-376c | HOXB6    | HOXB6    | HOXB6    |
| hsa-miR-376c | HOXB7    | HOXB7    | HOXB7    |
| hsa-miR-376c | HS3ST5   | HS3ST5   | HS3ST5   |
| hsa-miR-376c | ING5     | ING5     | ING5     |
| hsa-miR-376c | IQGAP2   | IQGAP2   | IQGAP2   |
| hsa-miR-376c | LRP8     | LRP8     | LRP8     |
| hsa-miR-376c | LYN      | LYN      | LYN      |
| hsa-miR-376c | MCTP1    | MCTP1    | MCTP1    |
| hsa-miR-376c | MTL5     | MTL5     | MTL5     |
| hsa-miR-376c | NETO1    | NETO1    | NETO1    |
| hsa-miR-376c | NEUROD6  | NEUROD6  | NEUROD6  |
| hsa-miR-376c | NFIB     | NFIB     | NFIB     |
| hsa-miR-376c | OPN3     | OPN3     | OPN3     |
| hsa-miR-376c | PANK3    | PANK3    | PANK3    |
| hsa-miR-376c | PAPD5    | PAPD5    | PAPD5    |
| hsa-miR-376c | PAX4     | PAX4     | PAX4     |
| hsa-miR-376c | PCDH19   | PCDH19   | PCDH19   |
| hsa-miR-376c | RABGAP1L | RABGAP1L | RABGAP1L |
| hsa-miR-376c | RARB     | RARB     | RARB     |
| hsa-miR-376c | RASAL2   | RASAL2   | RASAL2   |
| hsa-miR-376c | RNF170   | RNF170   | RNF170   |
| hsa-miR-376c | SERPINA7 | SERPINA7 | SERPINA7 |
| hsa-miR-376c | SGMS1    | SGMS1    | SGMS1    |
| hsa-miR-376c | SLC25A37 | SLC25A37 | SLC25A37 |
| hsa-miR-376c | SRGAP1   | SRGAP1   | SRGAP1   |
| hsa-miR-376c | SYF2     | SYF2     | SYF2     |
| hsa-miR-376c | TEP1     | TEP1     | TEP1     |
| hsa-miR-376c | TMEM38B  | TMEM38B  | TMEM38B  |
| hsa-miR-376c | UAP1     | UAP1     | UAP1     |
| hsa-miR-376c | UTS2     | UTS2     | UTS2     |
| hsa-miR-376c | VLDLR    | VLDLR    | VLDLR    |
| hsa-miR-376c | XKR6     | XKR6     | XKR6     |
| hsa-miR-376c | YLPM1    | YLPM1    | YLPM1    |
| hsa-miR-376c | YTHDF1   | YTHDF1   | YTHDF1   |
| hsa-miR-376c | ZCCHC12  | ZCCHC12  | ZCCHC12  |
| hsa-miR-376c | ZCCHC4   | ZCCHC4   | ZCCHC4   |
| hsa-miR-376c | ZCCHC7   | ZCCHC7   | ZCCHC7   |
| hsa-miR-376c | ZMYM2    | ZMYM2    | ZMYM2    |
| hsa-miR-379  | CCNB1    | CCNB1    | CCNB1    |
| hsa-miR-379  | CDKN2AIP | CDKN2AIP | CDKN2AIP |
| hsa-miR-379  | EIF4G2   | EIF4G2   | EIF4G2   |
| hsa-miR-379  | IL28RA   | IL28RA   | IL28RA   |

|             |          |          |          |
|-------------|----------|----------|----------|
| hsa-miR-379 | KLHL14   | KLHL14   | KLHL14   |
| hsa-miR-379 | MTM1     | MTM1     | MTM1     |
| hsa-miR-379 | PCGF5    | PCGF5    | PCGF5    |
| hsa-miR-379 | PXT1     | PXT1     | PXT1     |
| hsa-miR-379 | SLC20A1  | SLC20A1  | SLC20A1  |
| hsa-miR-379 | YARS     | YARS     | YARS     |
| hsa-miR-379 | ZBTB26   | ZBTB26   | ZBTB26   |
| hsa-miR-382 | ARIH2    | ARIH2    | ARIH2    |
| hsa-miR-382 | C17orf58 | C17orf58 | C17orf58 |
| hsa-miR-382 | CLTC     | CLTC     | CLTC     |
| hsa-miR-382 | CNBP     | CNBP     | CNBP     |
| hsa-miR-382 | DIMT1L   | DIMT1L   | DIMT1L   |
| hsa-miR-382 | EEF1A1   | EEF1A1   | EEF1A1   |
| hsa-miR-382 | FOXD3    | FOXD3    | FOXD3    |
| hsa-miR-382 | FSCN3    | FSCN3    | FSCN3    |
| hsa-miR-382 | GPR158   | GPR158   | GPR158   |
| hsa-miR-382 | HIPK3    | HIPK3    | HIPK3    |
| hsa-miR-382 | HNMT     | HNMT     | HNMT     |
| hsa-miR-382 | HSPA2    | HSPA2    | HSPA2    |
| hsa-miR-382 | LMTK3    | LMTK3    | LMTK3    |
| hsa-miR-382 | MARCKSL1 | MARCKSL1 | MARCKSL1 |
| hsa-miR-382 | MATR3    | MATR3    | MATR3    |
| hsa-miR-382 | NR2F2    | NR2F2    | NR2F2    |
| hsa-miR-382 | NUDT17   | NUDT17   | NUDT17   |
| hsa-miR-382 | PAIP2    | PAIP2    | PAIP2    |
| hsa-miR-382 | RERG     | RERG     | RERG     |
| hsa-miR-382 | RPE      | RPE      | RPE      |
| hsa-miR-382 | SLAIN1   | SLAIN1   | SLAIN1   |
| hsa-miR-382 | SMOC1    | SMOC1    | SMOC1    |
| hsa-miR-382 | TOP1     | TOP1     | TOP1     |
| hsa-miR-382 | USP2     | USP2     | USP2     |
| hsa-miR-382 | USP8     | USP8     | USP8     |
| hsa-miR-410 | ABHD13   | ABHD13   | ABHD13   |
| hsa-miR-410 | ADM      | ADM      | ADM      |
| hsa-miR-410 | BAZ2B    | BAZ2B    | BAZ2B    |
| hsa-miR-410 | CASK     | CASK     | CASK     |
| hsa-miR-410 | CBX8     | CBX8     | CBX8     |
| hsa-miR-410 | CHD7     | CHD7     | CHD7     |
| hsa-miR-410 | CPEB3    | CPEB3    | CPEB3    |
| hsa-miR-410 | CPSF6    | CPSF6    | CPSF6    |
| hsa-miR-410 | CTNNBIP1 | CTNNBIP1 | CTNNBIP1 |
| hsa-miR-410 | DCTN6    | DCTN6    | DCTN6    |
| hsa-miR-410 | DOCK8    | DOCK8    | DOCK8    |
| hsa-miR-410 | DPYSL2   | DPYSL2   | DPYSL2   |
| hsa-miR-410 | GAB1     | GAB1     | GAB1     |
| hsa-miR-410 | HIVEP2   | HIVEP2   | HIVEP2   |
| hsa-miR-410 | HMGB1    | HMGB1    | HMGB1    |
| hsa-miR-410 | HS3ST1   | HS3ST1   | HS3ST1   |
| hsa-miR-410 | MATR3    | MATR3    | MATR3    |
| hsa-miR-410 | MGA      | MGA      | MGA      |
| hsa-miR-410 | MIER1    | MIER1    | MIER1    |

|             |          |          |          |
|-------------|----------|----------|----------|
| hsa-miR-410 | NCOA5    | NCOA5    | NCOA5    |
| hsa-miR-410 | NETO1    | NETO1    | NETO1    |
| hsa-miR-410 | NFIB     | NFIB     | NFIB     |
| hsa-miR-410 | NFKBIZ   | NFKBIZ   | NFKBIZ   |
| hsa-miR-410 | NR2F2    | NR2F2    | NR2F2    |
| hsa-miR-410 | NTF3     | NTF3     | NTF3     |
| hsa-miR-410 | NUP35    | NUP35    | NUP35    |
| hsa-miR-410 | PCDH8    | PCDH8    | PCDH8    |
| hsa-miR-410 | PDE4D    | PDE4D    | PDE4D    |
| hsa-miR-410 | PLEKHM2  | PLEKHM2  | PLEKHM2  |
| hsa-miR-410 | PPP3R1   | PPP3R1   | PPP3R1   |
| hsa-miR-410 | PTX3     | PTX3     | PTX3     |
| hsa-miR-410 | RNF214   | RNF214   | RNF214   |
| hsa-miR-410 | SERPINB2 | SERPINB2 | SERPINB2 |
| hsa-miR-410 | SKIL     | SKIL     | SKIL     |
| hsa-miR-410 | SLC36A3  | SLC36A3  | SLC36A3  |
| hsa-miR-410 | TCF7L2   | TCF7L2   | TCF7L2   |
| hsa-miR-410 | TEX14    | TEX14    | TEX14    |
| hsa-miR-410 | TMEFF2   | TMEFF2   | TMEFF2   |
| hsa-miR-410 | TRAPPC3  | TRAPPC3  | TRAPPC3  |
| hsa-miR-410 | TRPC1    | TRPC1    | TRPC1    |
| hsa-miR-410 | TUBGCP3  | TUBGCP3  | TUBGCP3  |
| hsa-miR-410 | WWC1     | WWC1     | WWC1     |
| hsa-miR-410 | ZNF384   | ZNF384   | ZNF384   |
| hsa-miR-411 | C6orf145 | C6orf145 | C6orf145 |
| hsa-miR-411 | CDH2     | CDH2     | CDH2     |
| hsa-miR-411 | EIF4G2   | EIF4G2   | EIF4G2   |
| hsa-miR-411 | MAP2K1   | MAP2K1   | MAP2K1   |
| hsa-miR-411 | NRF1     | NRF1     | NRF1     |
| hsa-miR-411 | POU4F1   | POU4F1   | POU4F1   |
| hsa-miR-411 | PPFIA1   | PPFIA1   | PPFIA1   |
| hsa-miR-411 | SET      | SET      | SET      |
| hsa-miR-411 | SLC4A7   | SLC4A7   | SLC4A7   |
| hsa-miR-411 | SMARCA2  | SMARCA2  | SMARCA2  |
| hsa-miR-411 | STIM2    | STIM2    | STIM2    |
| hsa-miR-432 | ABCF2    | ABCF2    | ABCF2    |
| hsa-miR-432 | ACE      | ACE      | ACE      |
| hsa-miR-432 | ACSM1    | ACSM1    | ACSM1    |
| hsa-miR-432 | ACTG2    | ACTG2    | ACTG2    |
| hsa-miR-432 | ADA      | ADA      | ADA      |
| hsa-miR-432 | ADCK1    | ADCK1    | ADCK1    |
| hsa-miR-432 | ADORA2B  | ADORA2B  | ADORA2B  |
| hsa-miR-432 | ALPL     | ALPL     | ALPL     |
| hsa-miR-432 | ANXA9    | ANXA9    | ANXA9    |
| hsa-miR-432 | ARHGAP6  | ARHGAP6  | ARHGAP6  |
| hsa-miR-432 | ARHGEF15 | ARHGEF15 | ARHGEF15 |
| hsa-miR-432 | ARSK     | ARSK     | ARSK     |
| hsa-miR-432 | ASB2     | ASB2     | ASB2     |
| hsa-miR-432 | AXL      | AXL      | AXL      |
| hsa-miR-432 | BACE2    | BACE2    | BACE2    |
| hsa-miR-432 | BCAM     | BCAM     | BCAM     |



|             |           |           |           |
|-------------|-----------|-----------|-----------|
| hsa-miR-432 | BCAN      | BCAN      | BCAN      |
| hsa-miR-432 | BCCIP     | BCCIP     | BCCIP     |
| hsa-miR-432 | C12orf53  | C12orf53  | C12orf53  |
| hsa-miR-432 | C19orf57  | C19orf57  | C19orf57  |
| hsa-miR-432 | C1S       | C1S       | C1S       |
| hsa-miR-432 | C20orf173 | C20orf173 | C20orf173 |
| hsa-miR-432 | C3orf20   | C3orf20   | C3orf20   |
| hsa-miR-432 | C8orf31   | C8orf31   | C8orf31   |
| hsa-miR-432 | C8orf40   | C8orf40   | C8orf40   |
| hsa-miR-432 | C9orf102  | C9orf102  | C9orf102  |
| hsa-miR-432 | C9orf119  | C9orf119  | C9orf119  |
| hsa-miR-432 | CA3       | CA3       | CA3       |
| hsa-miR-432 | CA4       | CA4       | CA4       |
| hsa-miR-432 | CARD8     | CARD8     | CARD8     |
| hsa-miR-432 | CCDC102A  | CCDC102A  | CCDC102A  |
| hsa-miR-432 | CD99      | CD99      | CD99      |
| hsa-miR-432 | CDH3      | CDH3      | CDH3      |
| hsa-miR-432 | CEP72     | CEP72     | CEP72     |
| hsa-miR-432 | CER1      | CER1      | CER1      |
| hsa-miR-432 | CHAC1     | CHAC1     | CHAC1     |
| hsa-miR-432 | CHRM1     | CHRM1     | CHRM1     |
| hsa-miR-432 | CLTCL1    | CLTCL1    | CLTCL1    |
| hsa-miR-432 | COL4A5    | COL4A5    | COL4A5    |
| hsa-miR-432 | CPA3      | CPA3      | CPA3      |
| hsa-miR-432 | CPT1C     | CPT1C     | CPT1C     |
| hsa-miR-432 | CRX       | CRX       | CRX       |
| hsa-miR-432 | CRYBA1    | CRYBA1    | CRYBA1    |
| hsa-miR-432 | CSNK1D    | CSNK1D    | CSNK1D    |
| hsa-miR-432 | CSNK1G2   | CSNK1G2   | CSNK1G2   |
| hsa-miR-432 | CTLA4     | CTLA4     | CTLA4     |
| hsa-miR-432 | CTNND1    | CTNND1    | CTNND1    |
| hsa-miR-432 | CWF19L1   | CWF19L1   | CWF19L1   |
| hsa-miR-432 | CYP46A1   | CYP46A1   | CYP46A1   |
| hsa-miR-432 | CYorf15A  | CYorf15A  | CYorf15A  |
| hsa-miR-432 | DCPS      | DCPS      | DCPS      |
| hsa-miR-432 | DDX11     | DDX11     | DDX11     |
| hsa-miR-432 | DEF6      | DEF6      | DEF6      |
| hsa-miR-432 | DENND4B   | DENND4B   | DENND4B   |
| hsa-miR-432 | DEPDC1    | DEPDC1    | DEPDC1    |
| hsa-miR-432 | DGKA      | DGKA      | DGKA      |
| hsa-miR-432 | DNM1L     | DNM1L     | DNM1L     |
| hsa-miR-432 | DPF1      | DPF1      | DPF1      |
| hsa-miR-432 | DSCAML1   | DSCAML1   | DSCAML1   |
| hsa-miR-432 | ECHDC1    | ECHDC1    | ECHDC1    |
| hsa-miR-432 | EFTUD2    | EFTUD2    | EFTUD2    |
| hsa-miR-432 | EN1       | EN1       | EN1       |
| hsa-miR-432 | EPB41     | EPB41     | EPB41     |
| hsa-miR-432 | EPHB2     | EPHB2     | EPHB2     |
| hsa-miR-432 | EPHX1     | EPHX1     | EPHX1     |
| hsa-miR-432 | EPS8L3    | EPS8L3    | EPS8L3    |
| hsa-miR-432 | ERP27     | ERP27     | ERP27     |

|             |          |          |          |
|-------------|----------|----------|----------|
| hsa-miR-432 | ESPL1    | ESPL1    | ESPL1    |
| hsa-miR-432 | ESRRA    | ESRRA    | ESRRA    |
| hsa-miR-432 | FABP7    | FABP7    | FABP7    |
| hsa-miR-432 | FAM107A  | FAM107A  | FAM107A  |
| hsa-miR-432 | FAM59B   | FAM59B   | FAM59B   |
| hsa-miR-432 | FAS      | FAS      | FAS      |
| hsa-miR-432 | FBLIM1   | FBLIM1   | FBLIM1   |
| hsa-miR-432 | FKBP1A   | FKBP1A   | FKBP1A   |
| hsa-miR-432 | FMO4     | FMO4     | FMO4     |
| hsa-miR-432 | FXYD2    | FXYD2    | FXYD2    |
| hsa-miR-432 | FXYD4    | FXYD4    | FXYD4    |
| hsa-miR-432 | GABRA5   | GABRA5   | GABRA5   |
| hsa-miR-432 | GALNT13  | GALNT13  | GALNT13  |
| hsa-miR-432 | GOLGA7   | GOLGA7   | GOLGA7   |
| hsa-miR-432 | GPX2     | GPX2     | GPX2     |
| hsa-miR-432 | GRK5     | GRK5     | GRK5     |
| hsa-miR-432 | GTPBP6   | GTPBP6   | GTPBP6   |
| hsa-miR-432 | HECTD3   | HECTD3   | HECTD3   |
| hsa-miR-432 | HHAT     | HHAT     | HHAT     |
| hsa-miR-432 | HLA-DMB  | HLA-DMB  | HLA-DMB  |
| hsa-miR-432 | HSDL2    | HSDL2    | HSDL2    |
| hsa-miR-432 | ICAM5    | ICAM5    | ICAM5    |
| hsa-miR-432 | IGFL2    | IGFL2    | IGFL2    |
| hsa-miR-432 | INHBC    | INHBC    | INHBC    |
| hsa-miR-432 | ITGA2B   | ITGA2B   | ITGA2B   |
| hsa-miR-432 | KCNH6    | KCNH6    | KCNH6    |
| hsa-miR-432 | KIAA1609 | KIAA1609 | KIAA1609 |
| hsa-miR-432 | KLF6     | KLF6     | KLF6     |
| hsa-miR-432 | LDB1     | LDB1     | LDB1     |
| hsa-miR-432 | LEMD1    | LEMD1    | LEMD1    |
| hsa-miR-432 | LENEP    | LENEP    | LENEP    |
| hsa-miR-432 | LRRC38   | LRRC38   | LRRC38   |
| hsa-miR-432 | LRRN2    | LRRN2    | LRRN2    |
| hsa-miR-432 | LY86     | LY86     | LY86     |
| hsa-miR-432 | MAK      | MAK      | MAK      |
| hsa-miR-432 | MAML2    | MAML2    | MAML2    |
| hsa-miR-432 | MAZ      | MAZ      | MAZ      |
| hsa-miR-432 | MFSD8    | MFSD8    | MFSD8    |
| hsa-miR-432 | MRPL34   | MRPL34   | MRPL34   |
| hsa-miR-432 | MYL9     | MYL9     | MYL9     |
| hsa-miR-432 | MYOZ1    | MYOZ1    | MYOZ1    |
| hsa-miR-432 | NES      | NES      | NES      |
| hsa-miR-432 | NR1D1    | NR1D1    | NR1D1    |
| hsa-miR-432 | NRIP3    | NRIP3    | NRIP3    |
| hsa-miR-432 | NRM      | NRM      | NRM      |
| hsa-miR-432 | NSF      | NSF      | NSF      |
| hsa-miR-432 | NUCB1    | NUCB1    | NUCB1    |
| hsa-miR-432 | NUDT21   | NUDT21   | NUDT21   |
| hsa-miR-432 | OSGEP    | OSGEP    | OSGEP    |
| hsa-miR-432 | PCYOX1L  | PCYOX1L  | PCYOX1L  |
| hsa-miR-432 | PDE1C    | PDE1C    | PDE1C    |

|             |            |            |            |
|-------------|------------|------------|------------|
| hsa-miR-432 | PDE7A      | PDE7A      | PDE7A      |
| hsa-miR-432 | PITRM1     | PITRM1     | PITRM1     |
| hsa-miR-432 | PLEKHG4    | PLEKHG4    | PLEKHG4    |
| hsa-miR-432 | POLG       | POLG       | POLG       |
| hsa-miR-432 | POLR2F     | POLR2F     | POLR2F     |
| hsa-miR-432 | POLR3D     | POLR3D     | POLR3D     |
| hsa-miR-432 | POMGNT1    | POMGNT1    | POMGNT1    |
| hsa-miR-432 | PPAP2A     | PPAP2A     | PPAP2A     |
| hsa-miR-432 | PPM1K      | PPM1K      | PPM1K      |
| hsa-miR-432 | PRPF4B     | PRPF4B     | PRPF4B     |
| hsa-miR-432 | PRSS22     | PRSS22     | PRSS22     |
| hsa-miR-432 | PSMD1      | PSMD1      | PSMD1      |
| hsa-miR-432 | PTGIR      | PTGIR      | PTGIR      |
| hsa-miR-432 | PYGO2      | PYGO2      | PYGO2      |
| hsa-miR-432 | RABEP2     | RABEP2     | RABEP2     |
| hsa-miR-432 | RASGRF1    | RASGRF1    | RASGRF1    |
| hsa-miR-432 | RASSF4     | RASSF4     | RASSF4     |
| hsa-miR-432 | RIPK3      | RIPK3      | RIPK3      |
| hsa-miR-432 | RPUSD1     | RPUSD1     | RPUSD1     |
| hsa-miR-432 | S100A2     | S100A2     | S100A2     |
| hsa-miR-432 | S100A9     | S100A9     | S100A9     |
| hsa-miR-432 | SAMD4A     | SAMD4A     | SAMD4A     |
| hsa-miR-432 | SCNN1A     | SCNN1A     | SCNN1A     |
| hsa-miR-432 | SEL1L2     | SEL1L2     | SEL1L2     |
| hsa-miR-432 | SERPINA6   | SERPINA6   | SERPINA6   |
| hsa-miR-432 | SIGLEC5    | SIGLEC5    | SIGLEC5    |
| hsa-miR-432 | SLBP       | SLBP       | SLBP       |
| hsa-miR-432 | SLC13A2    | SLC13A2    | SLC13A2    |
| hsa-miR-432 | SLC26A6    | SLC26A6    | SLC26A6    |
| hsa-miR-432 | SLC34A1    | SLC34A1    | SLC34A1    |
| hsa-miR-432 | SLC39A7    | SLC39A7    | SLC39A7    |
| hsa-miR-432 | SLCO6A1    | SLCO6A1    | SLCO6A1    |
| hsa-miR-432 | SNX21      | SNX21      | SNX21      |
| hsa-miR-432 | SPATA8     | SPATA8     | SPATA8     |
| hsa-miR-432 | SPIN3      | SPIN3      | SPIN3      |
| hsa-miR-432 | SRM        | SRM        | SRM        |
| hsa-miR-432 | SS18L1     | SS18L1     | SS18L1     |
| hsa-miR-432 | ST5        | ST5        | ST5        |
| hsa-miR-432 | ST6GALNAC1 | ST6GALNAC1 | ST6GALNAC1 |
| hsa-miR-432 | STK16      | STK16      | STK16      |
| hsa-miR-432 | TBC1D22B   | TBC1D22B   | TBC1D22B   |
| hsa-miR-432 | TBCEL      | TBCEL      | TBCEL      |
| hsa-miR-432 | THUMPD2    | THUMPD2    | THUMPD2    |
| hsa-miR-432 | TLN1       | TLN1       | TLN1       |
| hsa-miR-432 | TMEM55B    | TMEM55B    | TMEM55B    |
| hsa-miR-432 | TMEM87A    | TMEM87A    | TMEM87A    |
| hsa-miR-432 | TMUB2      | TMUB2      | TMUB2      |
| hsa-miR-432 | TNNI1      | TNNI1      | TNNI1      |
| hsa-miR-432 | TRPC3      | TRPC3      | TRPC3      |
| hsa-miR-432 | TLL6       | TLL6       | TLL6       |
| hsa-miR-432 | UCK2       | UCK2       | UCK2       |

|             |          |          |          |
|-------------|----------|----------|----------|
| hsa-miR-432 | VASP     | VASP     | VASP     |
| hsa-miR-432 | VGf      | VGf      | VGf      |
| hsa-miR-432 | XPnPEP2  | XPnPEP2  | XPnPEP2  |
| hsa-miR-432 | XPO5     | XPO5     | XPO5     |
| hsa-miR-432 | XRCC6BP1 | XRCC6BP1 | XRCC6BP1 |
| hsa-miR-432 | ZBTB44   | ZBTB44   | ZBTB44   |
| hsa-miR-432 | ZDHHC2   | ZDHHC2   | ZDHHC2   |
| hsa-miR-432 | ZNF23    | ZNF23    | ZNF23    |
| hsa-miR-433 | ABCF2    | ABCF2    | ABCF2    |
| hsa-miR-433 | ACAD8    | ACAD8    | ACAD8    |
| hsa-miR-433 | ADRA1A   | ADRA1A   | ADRA1A   |
| hsa-miR-433 | ATP5S    | ATP5S    | ATP5S    |
| hsa-miR-433 | ATP6V0A1 | ATP6V0A1 | ATP6V0A1 |
| hsa-miR-433 | B4GALT3  | B4GALT3  | B4GALT3  |
| hsa-miR-433 | CDC27    | CDC27    | CDC27    |
| hsa-miR-433 | CENPJ    | CENPJ    | CENPJ    |
| hsa-miR-433 | CFTR     | CFTR     | CFTR     |
| hsa-miR-433 | CHMP5    | CHMP5    | CHMP5    |
| hsa-miR-433 | CLYBL    | CLYBL    | CLYBL    |
| hsa-miR-433 | COQ3     | COQ3     | COQ3     |
| hsa-miR-433 | COX6B1   | COX6B1   | COX6B1   |
| hsa-miR-433 | COX8A    | COX8A    | COX8A    |
| hsa-miR-433 | E2F3     | E2F3     | E2F3     |
| hsa-miR-433 | EPHA5    | EPHA5    | EPHA5    |
| hsa-miR-433 | FBXO5    | FBXO5    | FBXO5    |
| hsa-miR-433 | GATA3    | GATA3    | GATA3    |
| hsa-miR-433 | GEMIN5   | GEMIN5   | GEMIN5   |
| hsa-miR-433 | GPATCH8  | GPATCH8  | GPATCH8  |
| hsa-miR-433 | HIVEP1   | HIVEP1   | HIVEP1   |
| hsa-miR-433 | HIVEP2   | HIVEP2   | HIVEP2   |
| hsa-miR-433 | HOXA5    | HOXA5    | HOXA5    |
| hsa-miR-433 | HP1BP3   | HP1BP3   | HP1BP3   |
| hsa-miR-433 | IGFBP1   | IGFBP1   | IGFBP1   |
| hsa-miR-433 | KIAA0195 | KIAA0195 | KIAA0195 |
| hsa-miR-433 | LRRTM2   | LRRTM2   | LRRTM2   |
| hsa-miR-433 | NME5     | NME5     | NME5     |
| hsa-miR-433 | NMT2     | NMT2     | NMT2     |
| hsa-miR-433 | NOTCH1   | NOTCH1   | NOTCH1   |
| hsa-miR-433 | NR2F6    | NR2F6    | NR2F6    |
| hsa-miR-433 | PAK4     | PAK4     | PAK4     |
| hsa-miR-433 | PCCB     | PCCB     | PCCB     |
| hsa-miR-433 | PPM1A    | PPM1A    | PPM1A    |
| hsa-miR-433 | RAD9A    | RAD9A    | RAD9A    |
| hsa-miR-433 | RECQL    | RECQL    | RECQL    |
| hsa-miR-433 | SLC17A5  | SLC17A5  | SLC17A5  |
| hsa-miR-433 | SMG5     | SMG5     | SMG5     |
| hsa-miR-433 | SRFBP1   | SRFBP1   | SRFBP1   |
| hsa-miR-433 | STMN4    | STMN4    | STMN4    |
| hsa-miR-433 | SYNCRIP  | SYNCRIP  | SYNCRIP  |
| hsa-miR-433 | TBC1D19  | TBC1D19  | TBC1D19  |
| hsa-miR-433 | TDRD5    | TDRD5    | TDRD5    |

|              |          |          |          |
|--------------|----------|----------|----------|
| hsa-miR-433  | TIPRL    | TIPRL    | TIPRL    |
| hsa-miR-433  | TRIP12   | TRIP12   | TRIP12   |
| hsa-miR-433  | UBR1     | UBR1     | UBR1     |
| hsa-miR-433  | WDR45L   | WDR45L   | WDR45L   |
| hsa-miR-433  | XRCC6BP1 | XRCC6BP1 | XRCC6BP1 |
| hsa-miR-433  | ZC3H6    | ZC3H6    | ZC3H6    |
| hsa-miR-487b | MAP2K4   | MAP2K4   | MAP2K4   |
| hsa-miR-487b | NELF     | NELF     | NELF     |
| hsa-miR-487b | ZNF219   | ZNF219   | ZNF219   |
| hsa-miR-493  | AARS2    | AARS2    | AARS2    |
| hsa-miR-493  | ABCC11   | ABCC11   | ABCC11   |
| hsa-miR-493  | ACAA2    | ACAA2    | ACAA2    |
| hsa-miR-493  | ACCN4    | ACCN4    | ACCN4    |
| hsa-miR-493  | ACSBG2   | ACSBG2   | ACSBG2   |
| hsa-miR-493  | ACSS1    | ACSS1    | ACSS1    |
| hsa-miR-493  | ADORA3   | ADORA3   | ADORA3   |
| hsa-miR-493  | ADSSL1   | ADSSL1   | ADSSL1   |
| hsa-miR-493  | AHSG     | AHSG     | AHSG     |
| hsa-miR-493  | ALPI     | ALPI     | ALPI     |
| hsa-miR-493  | APOBEC3H | APOBEC3H | APOBEC3H |
| hsa-miR-493  | ARRB1    | ARRB1    | ARRB1    |
| hsa-miR-493  | ASB2     | ASB2     | ASB2     |
| hsa-miR-493  | ASB4     | ASB4     | ASB4     |
| hsa-miR-493  | ASTN1    | ASTN1    | ASTN1    |
| hsa-miR-493  | ATP1B3   | ATP1B3   | ATP1B3   |
| hsa-miR-493  | B3GALT4  | B3GALT4  | B3GALT4  |
| hsa-miR-493  | BAI3     | BAI3     | BAI3     |
| hsa-miR-493  | BAIAP2L2 | BAIAP2L2 | BAIAP2L2 |
| hsa-miR-493  | BCL2A1   | BCL2A1   | BCL2A1   |
| hsa-miR-493  | BRAP     | BRAP     | BRAP     |
| hsa-miR-493  | BRSK1    | BRSK1    | BRSK1    |
| hsa-miR-493  | BTBD6    | BTBD6    | BTBD6    |
| hsa-miR-493  | C11orf63 | C11orf63 | C11orf63 |
| hsa-miR-493  | C14orf1  | C14orf1  | C14orf1  |
| hsa-miR-493  | C15orf17 | C15orf17 | C15orf17 |
| hsa-miR-493  | C15orf32 | C15orf32 | C15orf32 |
| hsa-miR-493  | C15orf44 | C15orf44 | C15orf44 |
| hsa-miR-493  | C17orf49 | C17orf49 | C17orf49 |
| hsa-miR-493  | C19orf60 | C19orf60 | C19orf60 |
| hsa-miR-493  | C1orf50  | C1orf50  | C1orf50  |
| hsa-miR-493  | C20orf70 | C20orf70 | C20orf70 |
| hsa-miR-493  | C7orf43  | C7orf43  | C7orf43  |
| hsa-miR-493  | C9orf21  | C9orf21  | C9orf21  |
| hsa-miR-493  | CABLES1  | CABLES1  | CABLES1  |
| hsa-miR-493  | CACNG2   | CACNG2   | CACNG2   |
| hsa-miR-493  | CACNG6   | CACNG6   | CACNG6   |
| hsa-miR-493  | CAPN9    | CAPN9    | CAPN9    |
| hsa-miR-493  | CCT2     | CCT2     | CCT2     |
| hsa-miR-493  | CD40     | CD40     | CD40     |
| hsa-miR-493  | CDC27    | CDC27    | CDC27    |
| hsa-miR-493  | CDK10    | CDK10    | CDK10    |

|             |          |          |          |
|-------------|----------|----------|----------|
| hsa-miR-493 | CDX1     | CDX1     | CDX1     |
| hsa-miR-493 | CHD4     | CHD4     | CHD4     |
| hsa-miR-493 | CHRD     | CHRD     | CHRD     |
| hsa-miR-493 | CIC      | CIC      | CIC      |
| hsa-miR-493 | CIDEA    | CIDEA    | CIDEA    |
| hsa-miR-493 | CLEC4M   | CLEC4M   | CLEC4M   |
| hsa-miR-493 | CNPY1    | CNPY1    | CNPY1    |
| hsa-miR-493 | COL2A1   | COL2A1   | COL2A1   |
| hsa-miR-493 | CREB3L4  | CREB3L4  | CREB3L4  |
| hsa-miR-493 | CSF2RB   | CSF2RB   | CSF2RB   |
| hsa-miR-493 | DDB1     | DDB1     | DDB1     |
| hsa-miR-493 | DEFB127  | DEFB127  | DEFB127  |
| hsa-miR-493 | DLL4     | DLL4     | DLL4     |
| hsa-miR-493 | DMGDH    | DMGDH    | DMGDH    |
| hsa-miR-493 | DNAI2    | DNAI2    | DNAI2    |
| hsa-miR-493 | DST      | DST      | DST      |
| hsa-miR-493 | DTNB     | DTNB     | DTNB     |
| hsa-miR-493 | DYNLRB1  | DYNLRB1  | DYNLRB1  |
| hsa-miR-493 | E2F1     | E2F1     | E2F1     |
| hsa-miR-493 | EFNA4    | EFNA4    | EFNA4    |
| hsa-miR-493 | EPX      | EPX      | EPX      |
| hsa-miR-493 | ERCC3    | ERCC3    | ERCC3    |
| hsa-miR-493 | ERCC8    | ERCC8    | ERCC8    |
| hsa-miR-493 | FAAH2    | FAAH2    | FAAH2    |
| hsa-miR-493 | FAM59B   | FAM59B   | FAM59B   |
| hsa-miR-493 | FANCE    | FANCE    | FANCE    |
| hsa-miR-493 | FGF13    | FGF13    | FGF13    |
| hsa-miR-493 | FOXP2    | FOXP2    | FOXP2    |
| hsa-miR-493 | FTCD     | FTCD     | FTCD     |
| hsa-miR-493 | FUT6     | FUT6     | FUT6     |
| hsa-miR-493 | GABRG3   | GABRG3   | GABRG3   |
| hsa-miR-493 | GDF15    | GDF15    | GDF15    |
| hsa-miR-493 | GLYAT    | GLYAT    | GLYAT    |
| hsa-miR-493 | GMIP     | GMIP     | GMIP     |
| hsa-miR-493 | GNPDA2   | GNPDA2   | GNPDA2   |
| hsa-miR-493 | GPR114   | GPR114   | GPR114   |
| hsa-miR-493 | GRM1     | GRM1     | GRM1     |
| hsa-miR-493 | GSS      | GSS      | GSS      |
| hsa-miR-493 | GSTM2    | GSTM2    | GSTM2    |
| hsa-miR-493 | HCFC1R1  | HCFC1R1  | HCFC1R1  |
| hsa-miR-493 | HERC6    | HERC6    | HERC6    |
| hsa-miR-493 | HLA-DPB1 | HLA-DPB1 | HLA-DPB1 |
| hsa-miR-493 | HOXC13   | HOXC13   | HOXC13   |
| hsa-miR-493 | IDH3G    | IDH3G    | IDH3G    |
| hsa-miR-493 | ITGB5    | ITGB5    | ITGB5    |
| hsa-miR-493 | ITPKA    | ITPKA    | ITPKA    |
| hsa-miR-493 | KCNRG    | KCNRG    | KCNRG    |
| hsa-miR-493 | KDEL3    | KDEL3    | KDEL3    |
| hsa-miR-493 | KIAA0090 | KIAA0090 | KIAA0090 |
| hsa-miR-493 | KTN1     | KTN1     | KTN1     |
| hsa-miR-493 | LCAT     | LCAT     | LCAT     |

|             |          |          |          |
|-------------|----------|----------|----------|
| hsa-miR-493 | LGALS3BP | LGALS3BP | LGALS3BP |
| hsa-miR-493 | LGMN     | LGMN     | LGMN     |
| hsa-miR-493 | LIAS     | LIAS     | LIAS     |
| hsa-miR-493 | LIN7A    | LIN7A    | LIN7A    |
| hsa-miR-493 | LMO2     | LMO2     | LMO2     |
| hsa-miR-493 | LSM12    | LSM12    | LSM12    |
| hsa-miR-493 | MAB21L2  | MAB21L2  | MAB21L2  |
| hsa-miR-493 | MAL      | MAL      | MAL      |
| hsa-miR-493 | MAST4    | MAST4    | MAST4    |
| hsa-miR-493 | MBTPS1   | MBTPS1   | MBTPS1   |
| hsa-miR-493 | MCART1   | MCART1   | MCART1   |
| hsa-miR-493 | MCART2   | MCART2   | MCART2   |
| hsa-miR-493 | MDGA2    | MDGA2    | MDGA2    |
| hsa-miR-493 | MRPL36   | MRPL36   | MRPL36   |
| hsa-miR-493 | MRPS24   | MRPS24   | MRPS24   |
| hsa-miR-493 | MYF6     | MYF6     | MYF6     |
| hsa-miR-493 | MYL6     | MYL6     | MYL6     |
| hsa-miR-493 | MYO18B   | MYO18B   | MYO18B   |
| hsa-miR-493 | NCKAP1L  | NCKAP1L  | NCKAP1L  |
| hsa-miR-493 | NCOR1    | NCOR1    | NCOR1    |
| hsa-miR-493 | NFATC3   | NFATC3   | NFATC3   |
| hsa-miR-493 | NGRN     | NGRN     | NGRN     |
| hsa-miR-493 | NKX2-2   | NKX2-2   | NKX2-2   |
| hsa-miR-493 | NLRP5    | NLRP5    | NLRP5    |
| hsa-miR-493 | NLRP9    | NLRP9    | NLRP9    |
| hsa-miR-493 | NUCB1    | NUCB1    | NUCB1    |
| hsa-miR-493 | NUP54    | NUP54    | NUP54    |
| hsa-miR-493 | PARP9    | PARP9    | PARP9    |
| hsa-miR-493 | PASD1    | PASD1    | PASD1    |
| hsa-miR-493 | PCK2     | PCK2     | PCK2     |
| hsa-miR-493 | PEA15    | PEA15    | PEA15    |
| hsa-miR-493 | PIGP     | PIGP     | PIGP     |
| hsa-miR-493 | PIM3     | PIM3     | PIM3     |
| hsa-miR-493 | PKIG     | PKIG     | PKIG     |
| hsa-miR-493 | PKNOX2   | PKNOX2   | PKNOX2   |
| hsa-miR-493 | PLEKHA5  | PLEKHA5  | PLEKHA5  |
| hsa-miR-493 | POLR3D   | POLR3D   | POLR3D   |
| hsa-miR-493 | POLR3E   | POLR3E   | POLR3E   |
| hsa-miR-493 | PPP4R1   | PPP4R1   | PPP4R1   |
| hsa-miR-493 | PSME1    | PSME1    | PSME1    |
| hsa-miR-493 | PTTG1IP  | PTTG1IP  | PTTG1IP  |
| hsa-miR-493 | PUS1     | PUS1     | PUS1     |
| hsa-miR-493 | QPCTL    | QPCTL    | QPCTL    |
| hsa-miR-493 | RABEP1   | RABEP1   | RABEP1   |
| hsa-miR-493 | RBM4     | RBM4     | RBM4     |
| hsa-miR-493 | RDH12    | RDH12    | RDH12    |
| hsa-miR-493 | RHBDD1   | RHBDD1   | RHBDD1   |
| hsa-miR-493 | RHOC     | RHOC     | RHOC     |
| hsa-miR-493 | RNASE7   | RNASE7   | RNASE7   |
| hsa-miR-493 | RND2     | RND2     | RND2     |
| hsa-miR-493 | RNF38    | RNF38    | RNF38    |

|             |           |           |           |
|-------------|-----------|-----------|-----------|
| hsa-miR-493 | RPL9      | RPL9      | RPL9      |
| hsa-miR-493 | RRBP1     | RRBP1     | RRBP1     |
| hsa-miR-493 | RUFY2     | RUFY2     | RUFY2     |
| hsa-miR-493 | SDCCAG8   | SDCCAG8   | SDCCAG8   |
| hsa-miR-493 | SEPT6     | SEPT6     | SEPT6     |
| hsa-miR-493 | SLC35F3   | SLC35F3   | SLC35F3   |
| hsa-miR-493 | SLC39A11  | SLC39A11  | SLC39A11  |
| hsa-miR-493 | SLC7A4    | SLC7A4    | SLC7A4    |
| hsa-miR-493 | SMPD1     | SMPD1     | SMPD1     |
| hsa-miR-493 | SMTNL2    | SMTNL2    | SMTNL2    |
| hsa-miR-493 | SNX5      | SNX5      | SNX5      |
| hsa-miR-493 | SPAM1     | SPAM1     | SPAM1     |
| hsa-miR-493 | SPCS1     | SPCS1     | SPCS1     |
| hsa-miR-493 | SPEG      | SPEG      | SPEG      |
| hsa-miR-493 | SPR       | SPR       | SPR       |
| hsa-miR-493 | SRA1      | SRA1      | SRA1      |
| hsa-miR-493 | ST8SIA5   | ST8SIA5   | ST8SIA5   |
| hsa-miR-493 | STK38L    | STK38L    | STK38L    |
| hsa-miR-493 | SUOX      | SUOX      | SUOX      |
| hsa-miR-493 | SYNCRIP   | SYNCRIP   | SYNCRIP   |
| hsa-miR-493 | TAGLN3    | TAGLN3    | TAGLN3    |
| hsa-miR-493 | TBC1D20   | TBC1D20   | TBC1D20   |
| hsa-miR-493 | TDRD1     | TDRD1     | TDRD1     |
| hsa-miR-493 | TDRD3     | TDRD3     | TDRD3     |
| hsa-miR-493 | TEK       | TEK       | TEK       |
| hsa-miR-493 | TESK2     | TESK2     | TESK2     |
| hsa-miR-493 | THEM4     | THEM4     | THEM4     |
| hsa-miR-493 | TMEM25    | TMEM25    | TMEM25    |
| hsa-miR-493 | TMEM35    | TMEM35    | TMEM35    |
| hsa-miR-493 | TMPRSS11F | TMPRSS11F | TMPRSS11F |
| hsa-miR-493 | TNFRSF10B | TNFRSF10B | TNFRSF10B |
| hsa-miR-493 | TNFRSF18  | TNFRSF18  | TNFRSF18  |
| hsa-miR-493 | TNIP1     | TNIP1     | TNIP1     |
| hsa-miR-493 | TNNC1     | TNNC1     | TNNC1     |
| hsa-miR-493 | TUBB4     | TUBB4     | TUBB4     |
| hsa-miR-493 | U2AF1L4   | U2AF1L4   | U2AF1L4   |
| hsa-miR-493 | UBE3B     | UBE3B     | UBE3B     |
| hsa-miR-493 | UPF2      | UPF2      | UPF2      |
| hsa-miR-493 | WIPF1     | WIPF1     | WIPF1     |
| hsa-miR-493 | ZNF511    | ZNF511    | ZNF511    |
| hsa-miR-493 | ZNF691    | ZNF691    | ZNF691    |
| hsa-miR-494 | ARID4B    | ARID4B    | ARID4B    |
| hsa-miR-494 | ARMCX2    | ARMCX2    | ARMCX2    |
| hsa-miR-494 | C11orf30  | C11orf30  | C11orf30  |
| hsa-miR-494 | C11orf61  | C11orf61  | C11orf61  |
| hsa-miR-494 | C20orf103 | C20orf103 | C20orf103 |
| hsa-miR-494 | C5orf32   | C5orf32   | C5orf32   |
| hsa-miR-494 | C9        | C9        | C9        |
| hsa-miR-494 | CAMK1     | CAMK1     | CAMK1     |
| hsa-miR-494 | CAMK2D    | CAMK2D    | CAMK2D    |
| hsa-miR-494 | CBS       | CBS       | CBS       |



|             |          |          |          |
|-------------|----------|----------|----------|
| hsa-miR-494 | CCNT2    | CCNT2    | CCNT2    |
| hsa-miR-494 | CCRN4L   | CCRN4L   | CCRN4L   |
| hsa-miR-494 | CDS1     | CDS1     | CDS1     |
| hsa-miR-494 | CKS1B    | CKS1B    | CKS1B    |
| hsa-miR-494 | CLPTM1L  | CLPTM1L  | CLPTM1L  |
| hsa-miR-494 | DBR1     | DBR1     | DBR1     |
| hsa-miR-494 | DCP1B    | DCP1B    | DCP1B    |
| hsa-miR-494 | DNAJA2   | DNAJA2   | DNAJA2   |
| hsa-miR-494 | DSG2     | DSG2     | DSG2     |
| hsa-miR-494 | EIF1     | EIF1     | EIF1     |
| hsa-miR-494 | EIF2C3   | EIF2C3   | EIF2C3   |
| hsa-miR-494 | F11R     | F11R     | F11R     |
| hsa-miR-494 | GABRA5   | GABRA5   | GABRA5   |
| hsa-miR-494 | GLI3     | GLI3     | GLI3     |
| hsa-miR-494 | GNMB     | GNMB     | GNMB     |
| hsa-miR-494 | HDGF     | HDGF     | HDGF     |
| hsa-miR-494 | HHIP     | HHIP     | HHIP     |
| hsa-miR-494 | HIVEP1   | HIVEP1   | HIVEP1   |
| hsa-miR-494 | HS2ST1   | HS2ST1   | HS2ST1   |
| hsa-miR-494 | HTRA3    | HTRA3    | HTRA3    |
| hsa-miR-494 | IGSF1    | IGSF1    | IGSF1    |
| hsa-miR-494 | ING3     | ING3     | ING3     |
| hsa-miR-494 | JUND     | JUND     | JUND     |
| hsa-miR-494 | LAPTM4A  | LAPTM4A  | LAPTM4A  |
| hsa-miR-494 | LMO1     | LMO1     | LMO1     |
| hsa-miR-494 | LRP8     | LRP8     | LRP8     |
| hsa-miR-494 | LUM      | LUM      | LUM      |
| hsa-miR-494 | MGA      | MGA      | MGA      |
| hsa-miR-494 | MRPS23   | MRPS23   | MRPS23   |
| hsa-miR-494 | MYLIP    | MYLIP    | MYLIP    |
| hsa-miR-494 | NCF2     | NCF2     | NCF2     |
| hsa-miR-494 | NNT      | NNT      | NNT      |
| hsa-miR-494 | NPAS2    | NPAS2    | NPAS2    |
| hsa-miR-494 | OSBPL6   | OSBPL6   | OSBPL6   |
| hsa-miR-494 | PFDN4    | PFDN4    | PFDN4    |
| hsa-miR-494 | PITX2    | PITX2    | PITX2    |
| hsa-miR-494 | PLA2G12B | PLA2G12B | PLA2G12B |
| hsa-miR-494 | PNOC     | PNOC     | PNOC     |
| hsa-miR-494 | RBM4B    | RBM4B    | RBM4B    |
| hsa-miR-494 | SCN11A   | SCN11A   | SCN11A   |
| hsa-miR-494 | SEMA3A   | SEMA3A   | SEMA3A   |
| hsa-miR-494 | SHC3     | SHC3     | SHC3     |
| hsa-miR-494 | SLC26A3  | SLC26A3  | SLC26A3  |
| hsa-miR-494 | SLC38A2  | SLC38A2  | SLC38A2  |
| hsa-miR-494 | SLC46A3  | SLC46A3  | SLC46A3  |
| hsa-miR-494 | SUFU     | SUFU     | SUFU     |
| hsa-miR-494 | SUV39H2  | SUV39H2  | SUV39H2  |
| hsa-miR-494 | TAC1     | TAC1     | TAC1     |
| hsa-miR-494 | TACC2    | TACC2    | TACC2    |
| hsa-miR-494 | ZC3H7A   | ZC3H7A   | ZC3H7A   |
| hsa-miR-494 | ZCCHC8   | ZCCHC8   | ZCCHC8   |

|             |          |          |          |
|-------------|----------|----------|----------|
| hsa-miR-494 | ZFHX4    | ZFHX4    | ZFHX4    |
| hsa-miR-494 | ZFPM2    | ZFPM2    | ZFPM2    |
| hsa-miR-494 | ZIC2     | ZIC2     | ZIC2     |
| hsa-miR-494 | ZMYM3    | ZMYM3    | ZMYM3    |
| hsa-miR-494 | ZNF207   | ZNF207   | ZNF207   |
| hsa-miR-494 | ZRANB3   | ZRANB3   | ZRANB3   |
| hsa-miR-495 | ABCA2    | ABCA2    | ABCA2    |
| hsa-miR-495 | ACTC1    | ACTC1    | ACTC1    |
| hsa-miR-495 | ANAPC1   | ANAPC1   | ANAPC1   |
| hsa-miR-495 | ATP8A2   | ATP8A2   | ATP8A2   |
| hsa-miR-495 | BAI3     | BAI3     | BAI3     |
| hsa-miR-495 | BMI1     | BMI1     | BMI1     |
| hsa-miR-495 | BMPR1B   | BMPR1B   | BMPR1B   |
| hsa-miR-495 | BRD2     | BRD2     | BRD2     |
| hsa-miR-495 | C14orf28 | C14orf28 | C14orf28 |
| hsa-miR-495 | C6orf174 | C6orf174 | C6orf174 |
| hsa-miR-495 | CAMK2G   | CAMK2G   | CAMK2G   |
| hsa-miR-495 | CCNT2    | CCNT2    | CCNT2    |
| hsa-miR-495 | CDC34    | CDC34    | CDC34    |
| hsa-miR-495 | CEP63    | CEP63    | CEP63    |
| hsa-miR-495 | CMTM8    | CMTM8    | CMTM8    |
| hsa-miR-495 | CNBP     | CNBP     | CNBP     |
| hsa-miR-495 | CPNE4    | CPNE4    | CPNE4    |
| hsa-miR-495 | CPSF6    | CPSF6    | CPSF6    |
| hsa-miR-495 | CSNK1E   | CSNK1E   | CSNK1E   |
| hsa-miR-495 | DBC1     | DBC1     | DBC1     |
| hsa-miR-495 | DDHD2    | DDHD2    | DDHD2    |
| hsa-miR-495 | DDIT4    | DDIT4    | DDIT4    |
| hsa-miR-495 | DEDD     | DEDD     | DEDD     |
| hsa-miR-495 | DIDO1    | DIDO1    | DIDO1    |
| hsa-miR-495 | DLC1     | DLC1     | DLC1     |
| hsa-miR-495 | FAT3     | FAT3     | FAT3     |
| hsa-miR-495 | FGD6     | FGD6     | FGD6     |
| hsa-miR-495 | FUBP1    | FUBP1    | FUBP1    |
| hsa-miR-495 | GAL3ST4  | GAL3ST4  | GAL3ST4  |
| hsa-miR-495 | GFI1     | GFI1     | GFI1     |
| hsa-miR-495 | GPR22    | GPR22    | GPR22    |
| hsa-miR-495 | HMGCLL1  | HMGCLL1  | HMGCLL1  |
| hsa-miR-495 | HOXC9    | HOXC9    | HOXC9    |
| hsa-miR-495 | HP1BP3   | HP1BP3   | HP1BP3   |
| hsa-miR-495 | IREB2    | IREB2    | IREB2    |
| hsa-miR-495 | KCMF1    | KCMF1    | KCMF1    |
| hsa-miR-495 | KLHL5    | KLHL5    | KLHL5    |
| hsa-miR-495 | LRMP     | LRMP     | LRMP     |
| hsa-miR-495 | LRRK1    | LRRK1    | LRRK1    |
| hsa-miR-495 | METTL7A  | METTL7A  | METTL7A  |
| hsa-miR-495 | MGAT2    | MGAT2    | MGAT2    |
| hsa-miR-495 | MIA3     | MIA3     | MIA3     |
| hsa-miR-495 | MID2     | MID2     | MID2     |
| hsa-miR-495 | MINK1    | MINK1    | MINK1    |
| hsa-miR-495 | MORF4L1  | MORF4L1  | MORF4L1  |

|             |         |         |         |
|-------------|---------|---------|---------|
| hsa-miR-495 | MTMR12  | MTMR12  | MTMR12  |
| hsa-miR-495 | MYLK    | MYLK    | MYLK    |
| hsa-miR-495 | NAB2    | NAB2    | NAB2    |
| hsa-miR-495 | NEUROD6 | NEUROD6 | NEUROD6 |
| hsa-miR-495 | NFIB    | NFIB    | NFIB    |
| hsa-miR-495 | PDCD10  | PDCD10  | PDCD10  |
| hsa-miR-495 | PDE4D   | PDE4D   | PDE4D   |
| hsa-miR-495 | PEG3    | PEG3    | PEG3    |
| hsa-miR-495 | PFN2    | PFN2    | PFN2    |
| hsa-miR-495 | PHF21A  | PHF21A  | PHF21A  |
| hsa-miR-495 | PIK3R1  | PIK3R1  | PIK3R1  |
| hsa-miR-495 | PLCH1   | PLCH1   | PLCH1   |
| hsa-miR-495 | PNRC1   | PNRC1   | PNRC1   |
| hsa-miR-495 | POLDIP3 | POLDIP3 | POLDIP3 |
| hsa-miR-495 | PRR7    | PRR7    | PRR7    |
| hsa-miR-495 | R3HDM2  | R3HDM2  | R3HDM2  |
| hsa-miR-495 | RAD18   | RAD18   | RAD18   |
| hsa-miR-495 | RAI2    | RAI2    | RAI2    |
| hsa-miR-495 | RAN     | RAN     | RAN     |
| hsa-miR-495 | RANBP9  | RANBP9  | RANBP9  |
| hsa-miR-495 | RAPGEF6 | RAPGEF6 | RAPGEF6 |
| hsa-miR-495 | RBM41   | RBM41   | RBM41   |
| hsa-miR-495 | RBM8A   | RBM8A   | RBM8A   |
| hsa-miR-495 | RBPM2   | RBPM2   | RBPM2   |
| hsa-miR-495 | REPS1   | REPS1   | REPS1   |
| hsa-miR-495 | REV1    | REV1    | REV1    |
| hsa-miR-495 | SDHC    | SDHC    | SDHC    |
| hsa-miR-495 | SENP5   | SENP5   | SENP5   |
| hsa-miR-495 | SEPT7   | SEPT7   | SEPT7   |
| hsa-miR-495 | SH2D2A  | SH2D2A  | SH2D2A  |
| hsa-miR-495 | SMOC1   | SMOC1   | SMOC1   |
| hsa-miR-495 | SNAP25  | SNAP25  | SNAP25  |
| hsa-miR-495 | SNRPB   | SNRPB   | SNRPB   |
| hsa-miR-495 | SNRPB2  | SNRPB2  | SNRPB2  |
| hsa-miR-495 | SNRPD1  | SNRPD1  | SNRPD1  |
| hsa-miR-495 | ST3GAL5 | ST3GAL5 | ST3GAL5 |
| hsa-miR-495 | SUPT16H | SUPT16H | SUPT16H |
| hsa-miR-495 | TAF1    | TAF1    | TAF1    |
| hsa-miR-495 | TESC    | TESC    | TESC    |
| hsa-miR-495 | TMEM135 | TMEM135 | TMEM135 |
| hsa-miR-495 | TNC     | TNC     | TNC     |
| hsa-miR-495 | UBAP1   | UBAP1   | UBAP1   |
| hsa-miR-495 | UBE2Z   | UBE2Z   | UBE2Z   |
| hsa-miR-495 | VDAC2   | VDAC2   | VDAC2   |
| hsa-miR-495 | WDR52   | WDR52   | WDR52   |
| hsa-miR-495 | ZBTB37  | ZBTB37  | ZBTB37  |
| hsa-miR-495 | ZFP64   | ZFP64   | ZFP64   |
| hsa-miR-495 | ZFX     | ZFX     | ZFX     |
| hsa-miR-495 | ZNF238  | ZNF238  | ZNF238  |
| hsa-miR-495 | ZNF503  | ZNF503  | ZNF503  |
| hsa-miR-495 | ZNF740  | ZNF740  | ZNF740  |

|              |           |           |           |
|--------------|-----------|-----------|-----------|
| hsa-miR-517c | ABI3BP    | ABI3BP    | ABI3BP    |
| hsa-miR-517c | ACTR3B    | ACTR3B    | ACTR3B    |
| hsa-miR-517c | AKR1C4    | AKR1C4    | AKR1C4    |
| hsa-miR-517c | ARCN1     | ARCN1     | ARCN1     |
| hsa-miR-517c | AREG      | AREG      | AREG      |
| hsa-miR-517c | C12orf49  | C12orf49  | C12orf49  |
| hsa-miR-517c | C12orf65  | C12orf65  | C12orf65  |
| hsa-miR-517c | C20orf118 | C20orf118 | C20orf118 |
| hsa-miR-517c | C4orf34   | C4orf34   | C4orf34   |
| hsa-miR-517c | CBLN2     | CBLN2     | CBLN2     |
| hsa-miR-517c | CCDC89    | CCDC89    | CCDC89    |
| hsa-miR-517c | CCNK      | CCNK      | CCNK      |
| hsa-miR-517c | CDK3      | CDK3      | CDK3      |
| hsa-miR-517c | CDKN1C    | CDKN1C    | CDKN1C    |
| hsa-miR-517c | COLEC10   | COLEC10   | COLEC10   |
| hsa-miR-517c | CTSZ      | CTSZ      | CTSZ      |
| hsa-miR-517c | DBN1      | DBN1      | DBN1      |
| hsa-miR-517c | DENND1B   | DENND1B   | DENND1B   |
| hsa-miR-517c | DYM       | DYM       | DYM       |
| hsa-miR-517c | EIF4G3    | EIF4G3    | EIF4G3    |
| hsa-miR-517c | EPM2A     | EPM2A     | EPM2A     |
| hsa-miR-517c | FFAR2     | FFAR2     | FFAR2     |
| hsa-miR-517c | FRMD4A    | FRMD4A    | FRMD4A    |
| hsa-miR-517c | GRAMD1A   | GRAMD1A   | GRAMD1A   |
| hsa-miR-517c | IL22RA1   | IL22RA1   | IL22RA1   |
| hsa-miR-517c | ISL1      | ISL1      | ISL1      |
| hsa-miR-517c | KRT9      | KRT9      | KRT9      |
| hsa-miR-517c | LEMD3     | LEMD3     | LEMD3     |
| hsa-miR-517c | LRRTM3    | LRRTM3    | LRRTM3    |
| hsa-miR-517c | MAPK9     | MAPK9     | MAPK9     |
| hsa-miR-517c | MPPE1     | MPPE1     | MPPE1     |
| hsa-miR-517c | MS4A4A    | MS4A4A    | MS4A4A    |
| hsa-miR-517c | MYH4      | MYH4      | MYH4      |
| hsa-miR-517c | NFIB      | NFIB      | NFIB      |
| hsa-miR-517c | NKD1      | NKD1      | NKD1      |
| hsa-miR-517c | NLRP7     | NLRP7     | NLRP7     |
| hsa-miR-517c | NPHS2     | NPHS2     | NPHS2     |
| hsa-miR-517c | NUPL2     | NUPL2     | NUPL2     |
| hsa-miR-517c | PLP2      | PLP2      | PLP2      |
| hsa-miR-517c | PTGES     | PTGES     | PTGES     |
| hsa-miR-517c | RAPGEFL1  | RAPGEFL1  | RAPGEFL1  |
| hsa-miR-517c | SEMA5B    | SEMA5B    | SEMA5B    |
| hsa-miR-517c | SLC46A2   | SLC46A2   | SLC46A2   |
| hsa-miR-517c | SVEP1     | SVEP1     | SVEP1     |
| hsa-miR-517c | TARSL2    | TARSL2    | TARSL2    |
| hsa-miR-517c | TMEM111   | TMEM111   | TMEM111   |
| hsa-miR-517c | TMEM139   | TMEM139   | TMEM139   |
| hsa-miR-517c | TNIP1     | TNIP1     | TNIP1     |
| hsa-miR-517c | TNIP3     | TNIP3     | TNIP3     |
| hsa-miR-517c | TRPA1     | TRPA1     | TRPA1     |
| hsa-miR-517c | USP1      | USP1      | USP1      |

|              |          |          |          |
|--------------|----------|----------|----------|
| hsa-miR-517c | WDR45L   | WDR45L   | WDR45L   |
| hsa-miR-517c | ZNF436   | ZNF436   | ZNF436   |
| hsa-miR-517c | ZNF521   | ZNF521   | ZNF521   |
| hsa-miR-519e | AADAC    | AADAC    | AADAC    |
| hsa-miR-519e | ABCA6    | ABCA6    | ABCA6    |
| hsa-miR-519e | ABCD3    | ABCD3    | ABCD3    |
| hsa-miR-519e | ACAA1    | ACAA1    | ACAA1    |
| hsa-miR-519e | ACAD9    | ACAD9    | ACAD9    |
| hsa-miR-519e | ACBD3    | ACBD3    | ACBD3    |
| hsa-miR-519e | ADAMTSL5 | ADAMTSL5 | ADAMTSL5 |
| hsa-miR-519e | ADPRHL2  | ADPRHL2  | ADPRHL2  |
| hsa-miR-519e | AHNAK2   | AHNAK2   | AHNAK2   |
| hsa-miR-519e | AKR7A2   | AKR7A2   | AKR7A2   |
| hsa-miR-519e | ANKRD29  | ANKRD29  | ANKRD29  |
| hsa-miR-519e | ARHGAP30 | ARHGAP30 | ARHGAP30 |
| hsa-miR-519e | ARIH1    | ARIH1    | ARIH1    |
| hsa-miR-519e | ATP6V0B  | ATP6V0B  | ATP6V0B  |
| hsa-miR-519e | AVPI1    | AVPI1    | AVPI1    |
| hsa-miR-519e | BARHL2   | BARHL2   | BARHL2   |
| hsa-miR-519e | BCL11A   | BCL11A   | BCL11A   |
| hsa-miR-519e | BCOR     | BCOR     | BCOR     |
| hsa-miR-519e | BRP44    | BRP44    | BRP44    |
| hsa-miR-519e | BTG4     | BTG4     | BTG4     |
| hsa-miR-519e | C12orf65 | C12orf65 | C12orf65 |
| hsa-miR-519e | C13orf34 | C13orf34 | C13orf34 |
| hsa-miR-519e | C14orf2  | C14orf2  | C14orf2  |
| hsa-miR-519e | C19orf2  | C19orf2  | C19orf2  |
| hsa-miR-519e | C1orf124 | C1orf124 | C1orf124 |
| hsa-miR-519e | C2orf42  | C2orf42  | C2orf42  |
| hsa-miR-519e | C6orf64  | C6orf64  | C6orf64  |
| hsa-miR-519e | C8orf48  | C8orf48  | C8orf48  |
| hsa-miR-519e | CACNA1D  | CACNA1D  | CACNA1D  |
| hsa-miR-519e | CD99     | CD99     | CD99     |
| hsa-miR-519e | CDH4     | CDH4     | CDH4     |
| hsa-miR-519e | CDKN1B   | CDKN1B   | CDKN1B   |
| hsa-miR-519e | COPS6    | COPS6    | COPS6    |
| hsa-miR-519e | COX11    | COX11    | COX11    |
| hsa-miR-519e | CR2      | CR2      | CR2      |
| hsa-miR-519e | CRYZL1   | CRYZL1   | CRYZL1   |
| hsa-miR-519e | CSPP1    | CSPP1    | CSPP1    |
| hsa-miR-519e | CTSF     | CTSF     | CTSF     |
| hsa-miR-519e | DAPK2    | DAPK2    | DAPK2    |
| hsa-miR-519e | DCAKD    | DCAKD    | DCAKD    |
| hsa-miR-519e | DENND1B  | DENND1B  | DENND1B  |
| hsa-miR-519e | DENND4B  | DENND4B  | DENND4B  |
| hsa-miR-519e | DES      | DES      | DES      |
| hsa-miR-519e | DHODH    | DHODH    | DHODH    |
| hsa-miR-519e | DHX15    | DHX15    | DHX15    |
| hsa-miR-519e | DLG2     | DLG2     | DLG2     |
| hsa-miR-519e | DLL1     | DLL1     | DLL1     |
| hsa-miR-519e | DNAJC15  | DNAJC15  | DNAJC15  |

|              |          |          |          |
|--------------|----------|----------|----------|
| hsa-miR-519e | DOCK4    | DOCK4    | DOCK4    |
| hsa-miR-519e | DPYSL5   | DPYSL5   | DPYSL5   |
| hsa-miR-519e | DSG4     | DSG4     | DSG4     |
| hsa-miR-519e | EBP      | EBP      | EBP      |
| hsa-miR-519e | EGR4     | EGR4     | EGR4     |
| hsa-miR-519e | EPGN     | EPGN     | EPGN     |
| hsa-miR-519e | EPHA1    | EPHA1    | EPHA1    |
| hsa-miR-519e | ETF1     | ETF1     | ETF1     |
| hsa-miR-519e | EXO1     | EXO1     | EXO1     |
| hsa-miR-519e | FAM38B   | FAM38B   | FAM38B   |
| hsa-miR-519e | FAM83A   | FAM83A   | FAM83A   |
| hsa-miR-519e | FAT2     | FAT2     | FAT2     |
| hsa-miR-519e | FAT4     | FAT4     | FAT4     |
| hsa-miR-519e | FBXL17   | FBXL17   | FBXL17   |
| hsa-miR-519e | FEZF1    | FEZF1    | FEZF1    |
| hsa-miR-519e | FGF1     | FGF1     | FGF1     |
| hsa-miR-519e | GALE     | GALE     | GALE     |
| hsa-miR-519e | GALK2    | GALK2    | GALK2    |
| hsa-miR-519e | GCNT4    | GCNT4    | GCNT4    |
| hsa-miR-519e | GDA      | GDA      | GDA      |
| hsa-miR-519e | GLOD5    | GLOD5    | GLOD5    |
| hsa-miR-519e | GPR123   | GPR123   | GPR123   |
| hsa-miR-519e | GPR77    | GPR77    | GPR77    |
| hsa-miR-519e | GSTM2    | GSTM2    | GSTM2    |
| hsa-miR-519e | HBXIP    | HBXIP    | HBXIP    |
| hsa-miR-519e | HHIP     | HHIP     | HHIP     |
| hsa-miR-519e | HSPA12B  | HSPA12B  | HSPA12B  |
| hsa-miR-519e | HSPA4L   | HSPA4L   | HSPA4L   |
| hsa-miR-519e | ICT1     | ICT1     | ICT1     |
| hsa-miR-519e | IFNA16   | IFNA16   | IFNA16   |
| hsa-miR-519e | IFNA17   | IFNA17   | IFNA17   |
| hsa-miR-519e | IFNA21   | IFNA21   | IFNA21   |
| hsa-miR-519e | IFNA4    | IFNA4    | IFNA4    |
| hsa-miR-519e | IGSF21   | IGSF21   | IGSF21   |
| hsa-miR-519e | IL25     | IL25     | IL25     |
| hsa-miR-519e | INHBA    | INHBA    | INHBA    |
| hsa-miR-519e | INHBE    | INHBE    | INHBE    |
| hsa-miR-519e | KIAA1324 | KIAA1324 | KIAA1324 |
| hsa-miR-519e | KLK13    | KLK13    | KLK13    |
| hsa-miR-519e | KRT71    | KRT71    | KRT71    |
| hsa-miR-519e | LBP      | LBP      | LBP      |
| hsa-miR-519e | LCE3D    | LCE3D    | LCE3D    |
| hsa-miR-519e | LCE3E    | LCE3E    | LCE3E    |
| hsa-miR-519e | LGALS8   | LGALS8   | LGALS8   |
| hsa-miR-519e | LMBRD2   | LMBRD2   | LMBRD2   |
| hsa-miR-519e | LMO7     | LMO7     | LMO7     |
| hsa-miR-519e | LRRC31   | LRRC31   | LRRC31   |
| hsa-miR-519e | LRRFIP1  | LRRFIP1  | LRRFIP1  |
| hsa-miR-519e | LTV1     | LTV1     | LTV1     |
| hsa-miR-519e | MAGEE1   | MAGEE1   | MAGEE1   |
| hsa-miR-519e | MAK      | MAK      | MAK      |

|              |          |          |          |
|--------------|----------|----------|----------|
| hsa-miR-519e | MARS2    | MARS2    | MARS2    |
| hsa-miR-519e | MAT2A    | MAT2A    | MAT2A    |
| hsa-miR-519e | MBD1     | MBD1     | MBD1     |
| hsa-miR-519e | MED31    | MED31    | MED31    |
| hsa-miR-519e | MEOX2    | MEOX2    | MEOX2    |
| hsa-miR-519e | MMP2     | MMP2     | MMP2     |
| hsa-miR-519e | MOGAT3   | MOGAT3   | MOGAT3   |
| hsa-miR-519e | MPO      | MPO      | MPO      |
| hsa-miR-519e | MPV17    | MPV17    | MPV17    |
| hsa-miR-519e | MRPL24   | MRPL24   | MRPL24   |
| hsa-miR-519e | MRPL43   | MRPL43   | MRPL43   |
| hsa-miR-519e | MYO1C    | MYO1C    | MYO1C    |
| hsa-miR-519e | NANOS1   | NANOS1   | NANOS1   |
| hsa-miR-519e | NKIRAS1  | NKIRAS1  | NKIRAS1  |
| hsa-miR-519e | NMD3     | NMD3     | NMD3     |
| hsa-miR-519e | NPL      | NPL      | NPL      |
| hsa-miR-519e | PASD1    | PASD1    | PASD1    |
| hsa-miR-519e | PFN4     | PFN4     | PFN4     |
| hsa-miR-519e | PGM1     | PGM1     | PGM1     |
| hsa-miR-519e | PKD2L1   | PKD2L1   | PKD2L1   |
| hsa-miR-519e | PNOC     | PNOC     | PNOC     |
| hsa-miR-519e | PODN     | PODN     | PODN     |
| hsa-miR-519e | POLR3D   | POLR3D   | POLR3D   |
| hsa-miR-519e | PPARD    | PPARD    | PPARD    |
| hsa-miR-519e | PPL      | PPL      | PPL      |
| hsa-miR-519e | PPP1R7   | PPP1R7   | PPP1R7   |
| hsa-miR-519e | PPP2R5E  | PPP2R5E  | PPP2R5E  |
| hsa-miR-519e | PRAF2    | PRAF2    | PRAF2    |
| hsa-miR-519e | PRAMEF18 | PRAMEF18 | PRAMEF18 |
| hsa-miR-519e | PRAMEF2  | PRAMEF2  | PRAMEF2  |
| hsa-miR-519e | PREB     | PREB     | PREB     |
| hsa-miR-519e | PRKAG3   | PRKAG3   | PRKAG3   |
| hsa-miR-519e | PSIP1    | PSIP1    | PSIP1    |
| hsa-miR-519e | PTGER2   | PTGER2   | PTGER2   |
| hsa-miR-519e | PTPN3    | PTPN3    | PTPN3    |
| hsa-miR-519e | RAB27B   | RAB27B   | RAB27B   |
| hsa-miR-519e | RAB6A    | RAB6A    | RAB6A    |
| hsa-miR-519e | RBL2     | RBL2     | RBL2     |
| hsa-miR-519e | RGS6     | RGS6     | RGS6     |
| hsa-miR-519e | RIOK1    | RIOK1    | RIOK1    |
| hsa-miR-519e | RNF149   | RNF149   | RNF149   |
| hsa-miR-519e | RPGR     | RPGR     | RPGR     |
| hsa-miR-519e | RTN4     | RTN4     | RTN4     |
| hsa-miR-519e | RTN4RL1  | RTN4RL1  | RTN4RL1  |
| hsa-miR-519e | S100A16  | S100A16  | S100A16  |
| hsa-miR-519e | SCARF1   | SCARF1   | SCARF1   |
| hsa-miR-519e | SETD3    | SETD3    | SETD3    |
| hsa-miR-519e | SHMT2    | SHMT2    | SHMT2    |
| hsa-miR-519e | SLC16A14 | SLC16A14 | SLC16A14 |
| hsa-miR-519e | SLC25A20 | SLC25A20 | SLC25A20 |
| hsa-miR-519e | SLC30A10 | SLC30A10 | SLC30A10 |

|              |          |          |          |
|--------------|----------|----------|----------|
| hsa-miR-519e | SLC31A2  | SLC31A2  | SLC31A2  |
| hsa-miR-519e | SLC46A3  | SLC46A3  | SLC46A3  |
| hsa-miR-519e | SLCO3A1  | SLCO3A1  | SLCO3A1  |
| hsa-miR-519e | SMARCA2  | SMARCA2  | SMARCA2  |
| hsa-miR-519e | SPATA16  | SPATA16  | SPATA16  |
| hsa-miR-519e | STK17A   | STK17A   | STK17A   |
| hsa-miR-519e | STRA6    | STRA6    | STRA6    |
| hsa-miR-519e | STX3     | STX3     | STX3     |
| hsa-miR-519e | STX5     | STX5     | STX5     |
| hsa-miR-519e | SUCLG2   | SUCLG2   | SUCLG2   |
| hsa-miR-519e | SYDE1    | SYDE1    | SYDE1    |
| hsa-miR-519e | TAC4     | TAC4     | TAC4     |
| hsa-miR-519e | TBC1D10C | TBC1D10C | TBC1D10C |
| hsa-miR-519e | TBC1D2   | TBC1D2   | TBC1D2   |
| hsa-miR-519e | TBC1D22B | TBC1D22B | TBC1D22B |
| hsa-miR-519e | TEX101   | TEX101   | TEX101   |
| hsa-miR-519e | THBS3    | THBS3    | THBS3    |
| hsa-miR-519e | TIGD2    | TIGD2    | TIGD2    |
| hsa-miR-519e | TLN2     | TLN2     | TLN2     |
| hsa-miR-519e | TLR9     | TLR9     | TLR9     |
| hsa-miR-519e | TMEM138  | TMEM138  | TMEM138  |
| hsa-miR-519e | TMEM168  | TMEM168  | TMEM168  |
| hsa-miR-519e | TMEM61   | TMEM61   | TMEM61   |
| hsa-miR-519e | TRIM24   | TRIM24   | TRIM24   |
| hsa-miR-519e | TSHR     | TSHR     | TSHR     |
| hsa-miR-519e | TSPAN1   | TSPAN1   | TSPAN1   |
| hsa-miR-519e | TTLL1    | TTLL1    | TTLL1    |
| hsa-miR-519e | TTR      | TTR      | TTR      |
| hsa-miR-519e | UBE3C    | UBE3C    | UBE3C    |
| hsa-miR-519e | UCHL1    | UCHL1    | UCHL1    |
| hsa-miR-519e | UNKL     | UNKL     | UNKL     |
| hsa-miR-519e | VCP      | VCP      | VCP      |
| hsa-miR-519e | VDAC1    | VDAC1    | VDAC1    |
| hsa-miR-519e | WBSCR17  | WBSCR17  | WBSCR17  |
| hsa-miR-519e | WDR64    | WDR64    | WDR64    |
| hsa-miR-519e | WDR66    | WDR66    | WDR66    |
| hsa-miR-519e | WFDC12   | WFDC12   | WFDC12   |
| hsa-miR-519e | YPEL4    | YPEL4    | YPEL4    |
| hsa-miR-519e | ZFP3     | ZFP3     | ZFP3     |
| hsa-miR-519e | ZFYVE26  | ZFYVE26  | ZFYVE26  |
| hsa-miR-519e | ZNF155   | ZNF155   | ZNF155   |
| hsa-miR-519e | ZNF341   | ZNF341   | ZNF341   |
| hsa-miR-519e | ZNF354C  | ZNF354C  | ZNF354C  |
| hsa-miR-519e | ZNF513   | ZNF513   | ZNF513   |
| hsa-miR-519e | ZNF585B  | ZNF585B  | ZNF585B  |
| hsa-miR-519e | ZNF684   | ZNF684   | ZNF684   |
| hsa-miR-519e | ZNF689   | ZNF689   | ZNF689   |
| hsa-miR-519e | ZSCAN20  | ZSCAN20  | ZSCAN20  |
| hsa-miR-589  | ABCA8    | ABCA8    | ABCA8    |
| hsa-miR-589  | ABCC11   | ABCC11   | ABCC11   |
| hsa-miR-589  | ACAD10   | ACAD10   | ACAD10   |



|             |           |           |           |
|-------------|-----------|-----------|-----------|
| hsa-miR-589 | ACR       | ACR       | ACR       |
| hsa-miR-589 | ACTG2     | ACTG2     | ACTG2     |
| hsa-miR-589 | ADAR      | ADAR      | ADAR      |
| hsa-miR-589 | AKAP1     | AKAP1     | AKAP1     |
| hsa-miR-589 | ANKRD29   | ANKRD29   | ANKRD29   |
| hsa-miR-589 | APBB1     | APBB1     | APBB1     |
| hsa-miR-589 | ARMC10    | ARMC10    | ARMC10    |
| hsa-miR-589 | ARSI      | ARSI      | ARSI      |
| hsa-miR-589 | ATP2B2    | ATP2B2    | ATP2B2    |
| hsa-miR-589 | ATP8B2    | ATP8B2    | ATP8B2    |
| hsa-miR-589 | AVPR1B    | AVPR1B    | AVPR1B    |
| hsa-miR-589 | BAG1      | BAG1      | BAG1      |
| hsa-miR-589 | BARHL1    | BARHL1    | BARHL1    |
| hsa-miR-589 | BAZ2B     | BAZ2B     | BAZ2B     |
| hsa-miR-589 | BEST3     | BEST3     | BEST3     |
| hsa-miR-589 | BEST4     | BEST4     | BEST4     |
| hsa-miR-589 | BMPR1A    | BMPR1A    | BMPR1A    |
| hsa-miR-589 | BPGM      | BPGM      | BPGM      |
| hsa-miR-589 | BPNT1     | BPNT1     | BPNT1     |
| hsa-miR-589 | BRIP1     | BRIP1     | BRIP1     |
| hsa-miR-589 | C10orf71  | C10orf71  | C10orf71  |
| hsa-miR-589 | C14orf135 | C14orf135 | C14orf135 |
| hsa-miR-589 | C16orf70  | C16orf70  | C16orf70  |
| hsa-miR-589 | C1QC      | C1QC      | C1QC      |
| hsa-miR-589 | C1QL4     | C1QL4     | C1QL4     |
| hsa-miR-589 | C1orf111  | C1orf111  | C1orf111  |
| hsa-miR-589 | C1orf201  | C1orf201  | C1orf201  |
| hsa-miR-589 | C3AR1     | C3AR1     | C3AR1     |
| hsa-miR-589 | C9orf89   | C9orf89   | C9orf89   |
| hsa-miR-589 | CALCOCO1  | CALCOCO1  | CALCOCO1  |
| hsa-miR-589 | CALR      | CALR      | CALR      |
| hsa-miR-589 | CAMTA2    | CAMTA2    | CAMTA2    |
| hsa-miR-589 | CARD10    | CARD10    | CARD10    |
| hsa-miR-589 | CCBL2     | CCBL2     | CCBL2     |
| hsa-miR-589 | CCDC132   | CCDC132   | CCDC132   |
| hsa-miR-589 | CCNL2     | CCNL2     | CCNL2     |
| hsa-miR-589 | CD180     | CD180     | CD180     |
| hsa-miR-589 | CD82      | CD82      | CD82      |
| hsa-miR-589 | CD97      | CD97      | CD97      |
| hsa-miR-589 | CHD1L     | CHD1L     | CHD1L     |
| hsa-miR-589 | CNGB1     | CNGB1     | CNGB1     |
| hsa-miR-589 | CNTFR     | CNTFR     | CNTFR     |
| hsa-miR-589 | CNTNAP4   | CNTNAP4   | CNTNAP4   |
| hsa-miR-589 | COL1A1    | COL1A1    | COL1A1    |
| hsa-miR-589 | COX6B2    | COX6B2    | COX6B2    |
| hsa-miR-589 | CRYM      | CRYM      | CRYM      |
| hsa-miR-589 | CSNK2A2   | CSNK2A2   | CSNK2A2   |
| hsa-miR-589 | CTSE      | CTSE      | CTSE      |
| hsa-miR-589 | CXXC1     | CXXC1     | CXXC1     |
| hsa-miR-589 | CYB5R2    | CYB5R2    | CYB5R2    |
| hsa-miR-589 | CYP11A1   | CYP11A1   | CYP11A1   |

|             |         |         |         |
|-------------|---------|---------|---------|
| hsa-miR-589 | DFFB    | DFFB    | DFFB    |
| hsa-miR-589 | DGCR6   | DGCR6   | DGCR6   |
| hsa-miR-589 | DGCR6L  | DGCR6L  | DGCR6L  |
| hsa-miR-589 | DIP2B   | DIP2B   | DIP2B   |
| hsa-miR-589 | DLL1    | DLL1    | DLL1    |
| hsa-miR-589 | DNAJA3  | DNAJA3  | DNAJA3  |
| hsa-miR-589 | DTD1    | DTD1    | DTD1    |
| hsa-miR-589 | DUSP14  | DUSP14  | DUSP14  |
| hsa-miR-589 | EGR1    | EGR1    | EGR1    |
| hsa-miR-589 | EHD4    | EHD4    | EHD4    |
| hsa-miR-589 | ERC2    | ERC2    | ERC2    |
| hsa-miR-589 | ERRF1   | ERRF1   | ERRF1   |
| hsa-miR-589 | ETV5    | ETV5    | ETV5    |
| hsa-miR-589 | FADD    | FADD    | FADD    |
| hsa-miR-589 | FAM109B | FAM109B | FAM109B |
| hsa-miR-589 | FAM122C | FAM122C | FAM122C |
| hsa-miR-589 | FAM125A | FAM125A | FAM125A |
| hsa-miR-589 | FAM50B  | FAM50B  | FAM50B  |
| hsa-miR-589 | FAM63A  | FAM63A  | FAM63A  |
| hsa-miR-589 | FAM86B1 | FAM86B1 | FAM86B1 |
| hsa-miR-589 | FAM90A1 | FAM90A1 | FAM90A1 |
| hsa-miR-589 | FAM90A7 | FAM90A7 | FAM90A7 |
| hsa-miR-589 | FANCB   | FANCB   | FANCB   |
| hsa-miR-589 | FBXL5   | FBXL5   | FBXL5   |
| hsa-miR-589 | FBXO17  | FBXO17  | FBXO17  |
| hsa-miR-589 | FBXO7   | FBXO7   | FBXO7   |
| hsa-miR-589 | FGF3    | FGF3    | FGF3    |
| hsa-miR-589 | FGFBP3  | FGFBP3  | FGFBP3  |
| hsa-miR-589 | FKBP6   | FKBP6   | FKBP6   |
| hsa-miR-589 | FNTB    | FNTB    | FNTB    |
| hsa-miR-589 | FTHL17  | FTHL17  | FTHL17  |
| hsa-miR-589 | FUK     | FUK     | FUK     |
| hsa-miR-589 | GADL1   | GADL1   | GADL1   |
| hsa-miR-589 | GDA     | GDA     | GDA     |
| hsa-miR-589 | GHDC    | GHDC    | GHDC    |
| hsa-miR-589 | GLCE    | GLCE    | GLCE    |
| hsa-miR-589 | GNL3L   | GNL3L   | GNL3L   |
| hsa-miR-589 | GPRASP2 | GPRASP2 | GPRASP2 |
| hsa-miR-589 | GUCY2C  | GUCY2C  | GUCY2C  |
| hsa-miR-589 | HADHA   | HADHA   | HADHA   |
| hsa-miR-589 | HAS1    | HAS1    | HAS1    |
| hsa-miR-589 | HDAC3   | HDAC3   | HDAC3   |
| hsa-miR-589 | HDAC5   | HDAC5   | HDAC5   |
| hsa-miR-589 | HIF3A   | HIF3A   | HIF3A   |
| hsa-miR-589 | HKDC1   | HKDC1   | HKDC1   |
| hsa-miR-589 | HSD3B2  | HSD3B2  | HSD3B2  |
| hsa-miR-589 | IFI35   | IFI35   | IFI35   |
| hsa-miR-589 | IFI6    | IFI6    | IFI6    |
| hsa-miR-589 | IRS1    | IRS1    | IRS1    |
| hsa-miR-589 | ITFG1   | ITFG1   | ITFG1   |
| hsa-miR-589 | ITGB3   | ITGB3   | ITGB3   |

|             |           |           |           |
|-------------|-----------|-----------|-----------|
| hsa-miR-589 | KIAA0141  | KIAA0141  | KIAA0141  |
| hsa-miR-589 | KIF18A    | KIF18A    | KIF18A    |
| hsa-miR-589 | KRCC1     | KRCC1     | KRCC1     |
| hsa-miR-589 | LAD1      | LAD1      | LAD1      |
| hsa-miR-589 | LAGE3     | LAGE3     | LAGE3     |
| hsa-miR-589 | LAT       | LAT       | LAT       |
| hsa-miR-589 | LCK       | LCK       | LCK       |
| hsa-miR-589 | LCN1      | LCN1      | LCN1      |
| hsa-miR-589 | LONP2     | LONP2     | LONP2     |
| hsa-miR-589 | LPHN2     | LPHN2     | LPHN2     |
| hsa-miR-589 | LRMP      | LRMP      | LRMP      |
| hsa-miR-589 | LRRC8E    | LRRC8E    | LRRC8E    |
| hsa-miR-589 | LSM4      | LSM4      | LSM4      |
| hsa-miR-589 | MAP1B     | MAP1B     | MAP1B     |
| hsa-miR-589 | MARCKSL1  | MARCKSL1  | MARCKSL1  |
| hsa-miR-589 | MARVELD3  | MARVELD3  | MARVELD3  |
| hsa-miR-589 | MED12L    | MED12L    | MED12L    |
| hsa-miR-589 | MED4      | MED4      | MED4      |
| hsa-miR-589 | MME       | MME       | MME       |
| hsa-miR-589 | MOCS1     | MOCS1     | MOCS1     |
| hsa-miR-589 | MPPE1     | MPPE1     | MPPE1     |
| hsa-miR-589 | MTA2      | MTA2      | MTA2      |
| hsa-miR-589 | N6AMT1    | N6AMT1    | N6AMT1    |
| hsa-miR-589 | NDE1      | NDE1      | NDE1      |
| hsa-miR-589 | NEFM      | NEFM      | NEFM      |
| hsa-miR-589 | NFRKB     | NFRKB     | NFRKB     |
| hsa-miR-589 | NIPSNAP3A | NIPSNAP3A | NIPSNAP3A |
| hsa-miR-589 | NIPSNAP3B | NIPSNAP3B | NIPSNAP3B |
| hsa-miR-589 | NKD1      | NKD1      | NKD1      |
| hsa-miR-589 | NODAL     | NODAL     | NODAL     |
| hsa-miR-589 | NPC2      | NPC2      | NPC2      |
| hsa-miR-589 | NPTN      | NPTN      | NPTN      |
| hsa-miR-589 | OLFM2     | OLFM2     | OLFM2     |
| hsa-miR-589 | OSBP2     | OSBP2     | OSBP2     |
| hsa-miR-589 | OTUD7B    | OTUD7B    | OTUD7B    |
| hsa-miR-589 | PADI3     | PADI3     | PADI3     |
| hsa-miR-589 | PEG3      | PEG3      | PEG3      |
| hsa-miR-589 | PFKFB2    | PFKFB2    | PFKFB2    |
| hsa-miR-589 | PGAM1     | PGAM1     | PGAM1     |
| hsa-miR-589 | PIK3R3    | PIK3R3    | PIK3R3    |
| hsa-miR-589 | PLEKHG5   | PLEKHG5   | PLEKHG5   |
| hsa-miR-589 | POLR2G    | POLR2G    | POLR2G    |
| hsa-miR-589 | POMZP3    | POMZP3    | POMZP3    |
| hsa-miR-589 | PPP1R13B  | PPP1R13B  | PPP1R13B  |
| hsa-miR-589 | PRC1      | PRC1      | PRC1      |
| hsa-miR-589 | PRDM6     | PRDM6     | PRDM6     |
| hsa-miR-589 | PRF1      | PRF1      | PRF1      |
| hsa-miR-589 | PRKAR2A   | PRKAR2A   | PRKAR2A   |
| hsa-miR-589 | PRMT3     | PRMT3     | PRMT3     |
| hsa-miR-589 | PRR15     | PRR15     | PRR15     |
| hsa-miR-589 | PRSS21    | PRSS21    | PRSS21    |

|             |          |          |          |
|-------------|----------|----------|----------|
| hsa-miR-589 | PSD4     | PSD4     | PSD4     |
| hsa-miR-589 | PTCH1    | PTCH1    | PTCH1    |
| hsa-miR-589 | PTGER2   | PTGER2   | PTGER2   |
| hsa-miR-589 | PTGIR    | PTGIR    | PTGIR    |
| hsa-miR-589 | PTGS1    | PTGS1    | PTGS1    |
| hsa-miR-589 | R3HDML   | R3HDML   | R3HDML   |
| hsa-miR-589 | RAB3IP   | RAB3IP   | RAB3IP   |
| hsa-miR-589 | RASL11B  | RASL11B  | RASL11B  |
| hsa-miR-589 | RERG     | RERG     | RERG     |
| hsa-miR-589 | RETSAT   | RETSAT   | RETSAT   |
| hsa-miR-589 | RG9MTD1  | RG9MTD1  | RG9MTD1  |
| hsa-miR-589 | RNF213   | RNF213   | RNF213   |
| hsa-miR-589 | RP1      | RP1      | RP1      |
| hsa-miR-589 | RTN4RL1  | RTN4RL1  | RTN4RL1  |
| hsa-miR-589 | RXRB     | RXRB     | RXRB     |
| hsa-miR-589 | SALL3    | SALL3    | SALL3    |
| hsa-miR-589 | SAMD13   | SAMD13   | SAMD13   |
| hsa-miR-589 | SCML4    | SCML4    | SCML4    |
| hsa-miR-589 | SEMA4D   | SEMA4D   | SEMA4D   |
| hsa-miR-589 | SEMA6A   | SEMA6A   | SEMA6A   |
| hsa-miR-589 | SEPHS2   | SEPHS2   | SEPHS2   |
| hsa-miR-589 | SHC2     | SHC2     | SHC2     |
| hsa-miR-589 | SHC3     | SHC3     | SHC3     |
| hsa-miR-589 | SHCBP1   | SHCBP1   | SHCBP1   |
| hsa-miR-589 | SKIV2L2  | SKIV2L2  | SKIV2L2  |
| hsa-miR-589 | SLC25A14 | SLC25A14 | SLC25A14 |
| hsa-miR-589 | SLC25A20 | SLC25A20 | SLC25A20 |
| hsa-miR-589 | SLC32A1  | SLC32A1  | SLC32A1  |
| hsa-miR-589 | SLC3A1   | SLC3A1   | SLC3A1   |
| hsa-miR-589 | SLCO3A1  | SLCO3A1  | SLCO3A1  |
| hsa-miR-589 | SMEK1    | SMEK1    | SMEK1    |
| hsa-miR-589 | SMG6     | SMG6     | SMG6     |
| hsa-miR-589 | SPG21    | SPG21    | SPG21    |
| hsa-miR-589 | SSRP1    | SSRP1    | SSRP1    |
| hsa-miR-589 | STK17B   | STK17B   | STK17B   |
| hsa-miR-589 | STRN4    | STRN4    | STRN4    |
| hsa-miR-589 | SYNGR1   | SYNGR1   | SYNGR1   |
| hsa-miR-589 | SYNJ2    | SYNJ2    | SYNJ2    |
| hsa-miR-589 | SYT10    | SYT10    | SYT10    |
| hsa-miR-589 | SYT15    | SYT15    | SYT15    |
| hsa-miR-589 | TAPBP    | TAPBP    | TAPBP    |
| hsa-miR-589 | TFAP2B   | TFAP2B   | TFAP2B   |
| hsa-miR-589 | TMC2     | TMC2     | TMC2     |
| hsa-miR-589 | TMEM101  | TMEM101  | TMEM101  |
| hsa-miR-589 | TMEM163  | TMEM163  | TMEM163  |
| hsa-miR-589 | TMEM176B | TMEM176B | TMEM176B |
| hsa-miR-589 | TMEM71   | TMEM71   | TMEM71   |
| hsa-miR-589 | TMEM74   | TMEM74   | TMEM74   |
| hsa-miR-589 | TNNI1    | TNNI1    | TNNI1    |
| hsa-miR-589 | TNR      | TNR      | TNR      |
| hsa-miR-589 | TNRC6A   | TNRC6A   | TNRC6A   |

|             |          |          |          |
|-------------|----------|----------|----------|
| hsa-miR-589 | TOMM34   | TOMM34   | TOMM34   |
| hsa-miR-589 | TPM1     | TPM1     | TPM1     |
| hsa-miR-589 | TRIOBP   | TRIOBP   | TRIOBP   |
| hsa-miR-589 | TRIP6    | TRIP6    | TRIP6    |
| hsa-miR-589 | TTLL11   | TTLL11   | TTLL11   |
| hsa-miR-589 | TUBA3C   | TUBA3C   | TUBA3C   |
| hsa-miR-589 | TUBA3D   | TUBA3D   | TUBA3D   |
| hsa-miR-589 | WDR31    | WDR31    | WDR31    |
| hsa-miR-589 | WNT5B    | WNT5B    | WNT5B    |
| hsa-miR-589 | XRCC1    | XRCC1    | XRCC1    |
| hsa-miR-589 | XRCC6BP1 | XRCC6BP1 | XRCC6BP1 |
| hsa-miR-589 | ZBTB22   | ZBTB22   | ZBTB22   |
| hsa-miR-589 | ZBTB45   | ZBTB45   | ZBTB45   |
| hsa-miR-589 | ZDHHC13  | ZDHHC13  | ZDHHC13  |
| hsa-miR-589 | ZMYND17  | ZMYND17  | ZMYND17  |
| hsa-miR-589 | ZMYND19  | ZMYND19  | ZMYND19  |
| hsa-miR-589 | ZNF235   | ZNF235   | ZNF235   |
| hsa-miR-589 | ZNF764   | ZNF764   | ZNF764   |
| hsa-miR-589 | ZNRF1    | ZNRF1    | ZNRF1    |
| hsa-miR-589 | ZSCAN20  | ZSCAN20  | ZSCAN20  |
| hsa-miR-637 | ABTB2    | ABTB2    | ABTB2    |
| hsa-miR-637 | AIF1     | AIF1     | AIF1     |
| hsa-miR-637 | AIFM3    | AIFM3    | AIFM3    |
| hsa-miR-637 | ANKRD11  | ANKRD11  | ANKRD11  |
| hsa-miR-637 | AP2A2    | AP2A2    | AP2A2    |
| hsa-miR-637 | APOBEC3D | APOBEC3D | APOBEC3D |
| hsa-miR-637 | APOC2    | APOC2    | APOC2    |
| hsa-miR-637 | BAD      | BAD      | BAD      |
| hsa-miR-637 | BAX      | BAX      | BAX      |
| hsa-miR-637 | BIN1     | BIN1     | BIN1     |
| hsa-miR-637 | BMP1     | BMP1     | BMP1     |
| hsa-miR-637 | BRMS1    | BRMS1    | BRMS1    |
| hsa-miR-637 | BTBD2    | BTBD2    | BTBD2    |
| hsa-miR-637 | BZRAP1   | BZRAP1   | BZRAP1   |
| hsa-miR-637 | C11orf48 | C11orf48 | C11orf48 |
| hsa-miR-637 | C19orf53 | C19orf53 | C19orf53 |
| hsa-miR-637 | C19orf56 | C19orf56 | C19orf56 |
| hsa-miR-637 | C1orf127 | C1orf127 | C1orf127 |
| hsa-miR-637 | C1orf192 | C1orf192 | C1orf192 |
| hsa-miR-637 | C1orf85  | C1orf85  | C1orf85  |
| hsa-miR-637 | C22orf36 | C22orf36 | C22orf36 |
| hsa-miR-637 | C7orf43  | C7orf43  | C7orf43  |
| hsa-miR-637 | CABP4    | CABP4    | CABP4    |
| hsa-miR-637 | CALCA    | CALCA    | CALCA    |
| hsa-miR-637 | CALR     | CALR     | CALR     |
| hsa-miR-637 | CC2D1A   | CC2D1A   | CC2D1A   |
| hsa-miR-637 | CCDC114  | CCDC114  | CCDC114  |
| hsa-miR-637 | CCDC33   | CCDC33   | CCDC33   |
| hsa-miR-637 | CCT3     | CCT3     | CCT3     |
| hsa-miR-637 | CD79B    | CD79B    | CD79B    |
| hsa-miR-637 | CDX1     | CDX1     | CDX1     |

|             |         |         |         |
|-------------|---------|---------|---------|
| hsa-miR-637 | CENPT   | CENPT   | CENPT   |
| hsa-miR-637 | CIDEB   | CIDEB   | CIDEB   |
| hsa-miR-637 | CLU     | CLU     | CLU     |
| hsa-miR-637 | CMTM5   | CMTM5   | CMTM5   |
| hsa-miR-637 | CNN1    | CNN1    | CNN1    |
| hsa-miR-637 | CNTFR   | CNTFR   | CNTFR   |
| hsa-miR-637 | COL11A2 | COL11A2 | COL11A2 |
| hsa-miR-637 | COPE    | COPE    | COPE    |
| hsa-miR-637 | COPZ2   | COPZ2   | COPZ2   |
| hsa-miR-637 | CPNE2   | CPNE2   | CPNE2   |
| hsa-miR-637 | CTSW    | CTSW    | CTSW    |
| hsa-miR-637 | DCTN1   | DCTN1   | DCTN1   |
| hsa-miR-637 | DDX51   | DDX51   | DDX51   |
| hsa-miR-637 | DGKG    | DGKG    | DGKG    |
| hsa-miR-637 | DNAJB5  | DNAJB5  | DNAJB5  |
| hsa-miR-637 | DNTTIP1 | DNTTIP1 | DNTTIP1 |
| hsa-miR-637 | DOK7    | DOK7    | DOK7    |
| hsa-miR-637 | DRAP1   | DRAP1   | DRAP1   |
| hsa-miR-637 | DTX1    | DTX1    | DTX1    |
| hsa-miR-637 | DUOX1   | DUOX1   | DUOX1   |
| hsa-miR-637 | DUSP7   | DUSP7   | DUSP7   |
| hsa-miR-637 | EEFSEC  | EEFSEC  | EEFSEC  |
| hsa-miR-637 | EFCAB4B | EFCAB4B | EFCAB4B |
| hsa-miR-637 | EGFL7   | EGFL7   | EGFL7   |
| hsa-miR-637 | EGR4    | EGR4    | EGR4    |
| hsa-miR-637 | ELAC2   | ELAC2   | ELAC2   |
| hsa-miR-637 | ENSA    | ENSA    | ENSA    |
| hsa-miR-637 | EPN1    | EPN1    | EPN1    |
| hsa-miR-637 | ERCC1   | ERCC1   | ERCC1   |
| hsa-miR-637 | ESRRA   | ESRRA   | ESRRA   |
| hsa-miR-637 | EXOSC5  | EXOSC5  | EXOSC5  |
| hsa-miR-637 | FAM101A | FAM101A | FAM101A |
| hsa-miR-637 | FBN3    | FBN3    | FBN3    |
| hsa-miR-637 | FBXO44  | FBXO44  | FBXO44  |
| hsa-miR-637 | FCN1    | FCN1    | FCN1    |
| hsa-miR-637 | FEZF2   | FEZF2   | FEZF2   |
| hsa-miR-637 | FGF17   | FGF17   | FGF17   |
| hsa-miR-637 | FGR     | FGR     | FGR     |
| hsa-miR-637 | FKBP1A  | FKBP1A  | FKBP1A  |
| hsa-miR-637 | FKBP8   | FKBP8   | FKBP8   |
| hsa-miR-637 | FUZ     | FUZ     | FUZ     |
| hsa-miR-637 | FXVD4   | FXVD4   | FXVD4   |
| hsa-miR-637 | FXVD7   | FXVD7   | FXVD7   |
| hsa-miR-637 | GADD45B | GADD45B | GADD45B |
| hsa-miR-637 | GALNT14 | GALNT14 | GALNT14 |
| hsa-miR-637 | GBA     | GBA     | GBA     |
| hsa-miR-637 | GFI1B   | GFI1B   | GFI1B   |
| hsa-miR-637 | GIPC1   | GIPC1   | GIPC1   |
| hsa-miR-637 | GMPPA   | GMPPA   | GMPPA   |
| hsa-miR-637 | GNG2    | GNG2    | GNG2    |
| hsa-miR-637 | GNGT2   | GNGT2   | GNGT2   |

|             |            |            |            |
|-------------|------------|------------|------------|
| hsa-miR-637 | GP9        | GP9        | GP9        |
| hsa-miR-637 | GPI        | GPI        | GPI        |
| hsa-miR-637 | GPR17      | GPR17      | GPR17      |
| hsa-miR-637 | HCN2       | HCN2       | HCN2       |
| hsa-miR-637 | HCRT       | HCRT       | HCRT       |
| hsa-miR-637 | HIRIP3     | HIRIP3     | HIRIP3     |
| hsa-miR-637 | HM13       | HM13       | HM13       |
| hsa-miR-637 | HS6ST1     | HS6ST1     | HS6ST1     |
| hsa-miR-637 | HSD11B2    | HSD11B2    | HSD11B2    |
| hsa-miR-637 | ICAM5      | ICAM5      | ICAM5      |
| hsa-miR-637 | IDH3G      | IDH3G      | IDH3G      |
| hsa-miR-637 | IL12RB2    | IL12RB2    | IL12RB2    |
| hsa-miR-637 | KCNMB1     | KCNMB1     | KCNMB1     |
| hsa-miR-637 | KIFC2      | KIFC2      | KIFC2      |
| hsa-miR-637 | KLF12      | KLF12      | KLF12      |
| hsa-miR-637 | KLF14      | KLF14      | KLF14      |
| hsa-miR-637 | KLHDC8A    | KLHDC8A    | KLHDC8A    |
| hsa-miR-637 | KLHL7      | KLHL7      | KLHL7      |
| hsa-miR-637 | KPNB1      | KPNB1      | KPNB1      |
| hsa-miR-637 | KRTAP10-10 | KRTAP10-10 | KRTAP10-10 |
| hsa-miR-637 | LDB1       | LDB1       | LDB1       |
| hsa-miR-637 | LENG8      | LENG8      | LENG8      |
| hsa-miR-637 | LEPRE1     | LEPRE1     | LEPRE1     |
| hsa-miR-637 | LILRB5     | LILRB5     | LILRB5     |
| hsa-miR-637 | LRCH4      | LRCH4      | LRCH4      |
| hsa-miR-637 | LRRC18     | LRRC18     | LRRC18     |
| hsa-miR-637 | LRRC29     | LRRC29     | LRRC29     |
| hsa-miR-637 | LRRC4B     | LRRC4B     | LRRC4B     |
| hsa-miR-637 | LRRC52     | LRRC52     | LRRC52     |
| hsa-miR-637 | LTF        | LTF        | LTF        |
| hsa-miR-637 | MARCH9     | MARCH9     | MARCH9     |
| hsa-miR-637 | MTMR14     | MTMR14     | MTMR14     |
| hsa-miR-637 | MUS81      | MUS81      | MUS81      |
| hsa-miR-637 | NARFL      | NARFL      | NARFL      |
| hsa-miR-637 | NCR3       | NCR3       | NCR3       |
| hsa-miR-637 | NDST2      | NDST2      | NDST2      |
| hsa-miR-637 | NEK9       | NEK9       | NEK9       |
| hsa-miR-637 | NEU1       | NEU1       | NEU1       |
| hsa-miR-637 | NFIX       | NFIX       | NFIX       |
| hsa-miR-637 | NLGN3      | NLGN3      | NLGN3      |
| hsa-miR-637 | NPAS1      | NPAS1      | NPAS1      |
| hsa-miR-637 | NPM2       | NPM2       | NPM2       |
| hsa-miR-637 | NR4A1      | NR4A1      | NR4A1      |
| hsa-miR-637 | NXF3       | NXF3       | NXF3       |
| hsa-miR-637 | PAF1       | PAF1       | PAF1       |
| hsa-miR-637 | PLTP       | PLTP       | PLTP       |
| hsa-miR-637 | POLR2K     | POLR2K     | POLR2K     |
| hsa-miR-637 | PPP1CA     | PPP1CA     | PPP1CA     |
| hsa-miR-637 | PPP5C      | PPP5C      | PPP5C      |
| hsa-miR-637 | PRPF31     | PRPF31     | PRPF31     |
| hsa-miR-637 | PRR15      | PRR15      | PRR15      |

|             |          |          |          |
|-------------|----------|----------|----------|
| hsa-miR-637 | PRSS1    | PRSS1    | PRSS1    |
| hsa-miR-637 | PSTPIP1  | PSTPIP1  | PSTPIP1  |
| hsa-miR-637 | RAD54L2  | RAD54L2  | RAD54L2  |
| hsa-miR-637 | RARA     | RARA     | RARA     |
| hsa-miR-637 | RASGRP4  | RASGRP4  | RASGRP4  |
| hsa-miR-637 | RAVER1   | RAVER1   | RAVER1   |
| hsa-miR-637 | RAX      | RAX      | RAX      |
| hsa-miR-637 | RBP1     | RBP1     | RBP1     |
| hsa-miR-637 | RBP5     | RBP5     | RBP5     |
| hsa-miR-637 | RECQL5   | RECQL5   | RECQL5   |
| hsa-miR-637 | REEP6    | REEP6    | REEP6    |
| hsa-miR-637 | REM1     | REM1     | REM1     |
| hsa-miR-637 | RGL3     | RGL3     | RGL3     |
| hsa-miR-637 | RGS19    | RGS19    | RGS19    |
| hsa-miR-637 | RGS3     | RGS3     | RGS3     |
| hsa-miR-637 | RHCG     | RHCG     | RHCG     |
| hsa-miR-637 | RING1    | RING1    | RING1    |
| hsa-miR-637 | RUSC2    | RUSC2    | RUSC2    |
| hsa-miR-637 | SCLY     | SCLY     | SCLY     |
| hsa-miR-637 | SETD1A   | SETD1A   | SETD1A   |
| hsa-miR-637 | SGTA     | SGTA     | SGTA     |
| hsa-miR-637 | SH2B1    | SH2B1    | SH2B1    |
| hsa-miR-637 | SH2D3A   | SH2D3A   | SH2D3A   |
| hsa-miR-637 | SH3BGRL3 | SH3BGRL3 | SH3BGRL3 |
| hsa-miR-637 | SIX5     | SIX5     | SIX5     |
| hsa-miR-637 | SLC1A5   | SLC1A5   | SLC1A5   |
| hsa-miR-637 | SLC25A18 | SLC25A18 | SLC25A18 |
| hsa-miR-637 | SLC25A22 | SLC25A22 | SLC25A22 |
| hsa-miR-637 | SLC28A1  | SLC28A1  | SLC28A1  |
| hsa-miR-637 | SLC35F1  | SLC35F1  | SLC35F1  |
| hsa-miR-637 | SLC43A2  | SLC43A2  | SLC43A2  |
| hsa-miR-637 | SNAPC4   | SNAPC4   | SNAPC4   |
| hsa-miR-637 | SNX21    | SNX21    | SNX21    |
| hsa-miR-637 | SPTB     | SPTB     | SPTB     |
| hsa-miR-637 | ST14     | ST14     | ST14     |
| hsa-miR-637 | ST8SIA5  | ST8SIA5  | ST8SIA5  |
| hsa-miR-637 | SUV420H2 | SUV420H2 | SUV420H2 |
| hsa-miR-637 | TAGLN    | TAGLN    | TAGLN    |
| hsa-miR-637 | TARS2    | TARS2    | TARS2    |
| hsa-miR-637 | TBC1D10C | TBC1D10C | TBC1D10C |
| hsa-miR-637 | TCL1B    | TCL1B    | TCL1B    |
| hsa-miR-637 | TMEM187  | TMEM187  | TMEM187  |
| hsa-miR-637 | TMEM63B  | TMEM63B  | TMEM63B  |
| hsa-miR-637 | TMEM80   | TMEM80   | TMEM80   |
| hsa-miR-637 | TNNT2    | TNNT2    | TNNT2    |
| hsa-miR-637 | TRADD    | TRADD    | TRADD    |
| hsa-miR-637 | TRAF3IP2 | TRAF3IP2 | TRAF3IP2 |
| hsa-miR-637 | TRIM14   | TRIM14   | TRIM14   |
| hsa-miR-637 | TRIM47   | TRIM47   | TRIM47   |
| hsa-miR-637 | TSC22D4  | TSC22D4  | TSC22D4  |
| hsa-miR-637 | TTLL6    | TTLL6    | TTLL6    |



|             |          |          |          |
|-------------|----------|----------|----------|
| hsa-miR-637 | TYK2     | TYK2     | TYK2     |
| hsa-miR-637 | UBL7     | UBL7     | UBL7     |
| hsa-miR-637 | UPK2     | UPK2     | UPK2     |
| hsa-miR-637 | USP21    | USP21    | USP21    |
| hsa-miR-637 | USP4     | USP4     | USP4     |
| hsa-miR-637 | WBSCR27  | WBSCR27  | WBSCR27  |
| hsa-miR-637 | WDR45    | WDR45    | WDR45    |
| hsa-miR-637 | ZNF579   | ZNF579   | ZNF579   |
| hsa-miR-637 | ZNF668   | ZNF668   | ZNF668   |
| hsa-miR-655 | ABCC10   | ABCC10   | ABCC10   |
| hsa-miR-655 | ABCD4    | ABCD4    | ABCD4    |
| hsa-miR-655 | ABI1     | ABI1     | ABI1     |
| hsa-miR-655 | ABRA     | ABRA     | ABRA     |
| hsa-miR-655 | ACTL6A   | ACTL6A   | ACTL6A   |
| hsa-miR-655 | ADAM10   | ADAM10   | ADAM10   |
| hsa-miR-655 | ADM      | ADM      | ADM      |
| hsa-miR-655 | ADRA1A   | ADRA1A   | ADRA1A   |
| hsa-miR-655 | AGTPBP1  | AGTPBP1  | AGTPBP1  |
| hsa-miR-655 | AK2      | AK2      | AK2      |
| hsa-miR-655 | AK7      | AK7      | AK7      |
| hsa-miR-655 | AKT1     | AKT1     | AKT1     |
| hsa-miR-655 | ALG14    | ALG14    | ALG14    |
| hsa-miR-655 | ANKHD1   | ANKHD1   | ANKHD1   |
| hsa-miR-655 | ANKRA2   | ANKRA2   | ANKRA2   |
| hsa-miR-655 | ANKRD13C | ANKRD13C | ANKRD13C |
| hsa-miR-655 | ANKRD44  | ANKRD44  | ANKRD44  |
| hsa-miR-655 | ANKRD7   | ANKRD7   | ANKRD7   |
| hsa-miR-655 | ANXA4    | ANXA4    | ANXA4    |
| hsa-miR-655 | AP2A1    | AP2A1    | AP2A1    |
| hsa-miR-655 | APCS     | APCS     | APCS     |
| hsa-miR-655 | APOBEC1  | APOBEC1  | APOBEC1  |
| hsa-miR-655 | APOBEC3B | APOBEC3B | APOBEC3B |
| hsa-miR-655 | APOO     | APOO     | APOO     |
| hsa-miR-655 | AQP11    | AQP11    | AQP11    |
| hsa-miR-655 | ARFIP1   | ARFIP1   | ARFIP1   |
| hsa-miR-655 | ARHGAP17 | ARHGAP17 | ARHGAP17 |
| hsa-miR-655 | ARHGAP28 | ARHGAP28 | ARHGAP28 |
| hsa-miR-655 | ARHGAP29 | ARHGAP29 | ARHGAP29 |
| hsa-miR-655 | ASB12    | ASB12    | ASB12    |
| hsa-miR-655 | ASCL1    | ASCL1    | ASCL1    |
| hsa-miR-655 | ATF2     | ATF2     | ATF2     |
| hsa-miR-655 | ATP5H    | ATP5H    | ATP5H    |
| hsa-miR-655 | ATP6V0A4 | ATP6V0A4 | ATP6V0A4 |
| hsa-miR-655 | B3GALT2  | B3GALT2  | B3GALT2  |
| hsa-miR-655 | BAZ2B    | BAZ2B    | BAZ2B    |
| hsa-miR-655 | BHMT     | BHMT     | BHMT     |
| hsa-miR-655 | BIRC3    | BIRC3    | BIRC3    |
| hsa-miR-655 | BLZF1    | BLZF1    | BLZF1    |
| hsa-miR-655 | BOLL     | BOLL     | BOLL     |
| hsa-miR-655 | BRD7     | BRD7     | BRD7     |
| hsa-miR-655 | BRP44L   | BRP44L   | BRP44L   |

|             |           |           |           |
|-------------|-----------|-----------|-----------|
| hsa-miR-655 | C10orf118 | C10orf118 | C10orf118 |
| hsa-miR-655 | C11orf58  | C11orf58  | C11orf58  |
| hsa-miR-655 | C11orf71  | C11orf71  | C11orf71  |
| hsa-miR-655 | C17orf85  | C17orf85  | C17orf85  |
| hsa-miR-655 | C18orf10  | C18orf10  | C18orf10  |
| hsa-miR-655 | C18orf19  | C18orf19  | C18orf19  |
| hsa-miR-655 | C1orf101  | C1orf101  | C1orf101  |
| hsa-miR-655 | C4orf14   | C4orf14   | C4orf14   |
| hsa-miR-655 | C6orf58   | C6orf58   | C6orf58   |
| hsa-miR-655 | C8orf41   | C8orf41   | C8orf41   |
| hsa-miR-655 | C8orf76   | C8orf76   | C8orf76   |
| hsa-miR-655 | C9orf5    | C9orf5    | C9orf5    |
| hsa-miR-655 | C9orf84   | C9orf84   | C9orf84   |
| hsa-miR-655 | C9orf9    | C9orf9    | C9orf9    |
| hsa-miR-655 | CALU      | CALU      | CALU      |
| hsa-miR-655 | CAMLG     | CAMLG     | CAMLG     |
| hsa-miR-655 | CAP2      | CAP2      | CAP2      |
| hsa-miR-655 | CAPRIN2   | CAPRIN2   | CAPRIN2   |
| hsa-miR-655 | CARD11    | CARD11    | CARD11    |
| hsa-miR-655 | CASK      | CASK      | CASK      |
| hsa-miR-655 | CCBL2     | CCBL2     | CCBL2     |
| hsa-miR-655 | CCDC73    | CCDC73    | CCDC73    |
| hsa-miR-655 | CCDC83    | CCDC83    | CCDC83    |
| hsa-miR-655 | CDH2      | CDH2      | CDH2      |
| hsa-miR-655 | CDKN1C    | CDKN1C    | CDKN1C    |
| hsa-miR-655 | CDKN2A    | CDKN2A    | CDKN2A    |
| hsa-miR-655 | CDKN2AIP  | CDKN2AIP  | CDKN2AIP  |
| hsa-miR-655 | CENPK     | CENPK     | CENPK     |
| hsa-miR-655 | CFH       | CFH       | CFH       |
| hsa-miR-655 | CHIC2     | CHIC2     | CHIC2     |
| hsa-miR-655 | CLUL1     | CLUL1     | CLUL1     |
| hsa-miR-655 | CMTM8     | CMTM8     | CMTM8     |
| hsa-miR-655 | COL11A1   | COL11A1   | COL11A1   |
| hsa-miR-655 | COL9A1    | COL9A1    | COL9A1    |
| hsa-miR-655 | COPS4     | COPS4     | COPS4     |
| hsa-miR-655 | CORT      | CORT      | CORT      |
| hsa-miR-655 | CPNE8     | CPNE8     | CPNE8     |
| hsa-miR-655 | CPXCR1    | CPXCR1    | CPXCR1    |
| hsa-miR-655 | CRLF3     | CRLF3     | CRLF3     |
| hsa-miR-655 | CSRP3     | CSRP3     | CSRP3     |
| hsa-miR-655 | CSTF2T    | CSTF2T    | CSTF2T    |
| hsa-miR-655 | CXCR4     | CXCR4     | CXCR4     |
| hsa-miR-655 | CYP2C8    | CYP2C8    | CYP2C8    |
| hsa-miR-655 | CYP2C9    | CYP2C9    | CYP2C9    |
| hsa-miR-655 | CYP2R1    | CYP2R1    | CYP2R1    |
| hsa-miR-655 | DARS      | DARS      | DARS      |
| hsa-miR-655 | DCN       | DCN       | DCN       |
| hsa-miR-655 | DCTN6     | DCTN6     | DCTN6     |
| hsa-miR-655 | DDX20     | DDX20     | DDX20     |
| hsa-miR-655 | DEGS1     | DEGS1     | DEGS1     |
| hsa-miR-655 | DENND1B   | DENND1B   | DENND1B   |

|             |         |         |         |
|-------------|---------|---------|---------|
| hsa-miR-655 | DIRAS3  | DIRAS3  | DIRAS3  |
| hsa-miR-655 | DNAJC12 | DNAJC12 | DNAJC12 |
| hsa-miR-655 | DYRK4   | DYRK4   | DYRK4   |
| hsa-miR-655 | EAF2    | EAF2    | EAF2    |
| hsa-miR-655 | EIF1B   | EIF1B   | EIF1B   |
| hsa-miR-655 | EIF4G3  | EIF4G3  | EIF4G3  |
| hsa-miR-655 | EMCN    | EMCN    | EMCN    |
| hsa-miR-655 | ERH     | ERH     | ERH     |
| hsa-miR-655 | ETS2    | ETS2    | ETS2    |
| hsa-miR-655 | EXOC1   | EXOC1   | EXOC1   |
| hsa-miR-655 | EXOSC3  | EXOSC3  | EXOSC3  |
| hsa-miR-655 | F3      | F3      | F3      |
| hsa-miR-655 | FAM120C | FAM120C | FAM120C |
| hsa-miR-655 | FBLN1   | FBLN1   | FBLN1   |
| hsa-miR-655 | FCAMR   | FCAMR   | FCAMR   |
| hsa-miR-655 | FEZF1   | FEZF1   | FEZF1   |
| hsa-miR-655 | FMO4    | FMO4    | FMO4    |
| hsa-miR-655 | FOXR2   | FOXR2   | FOXR2   |
| hsa-miR-655 | FRK     | FRK     | FRK     |
| hsa-miR-655 | GAB1    | GAB1    | GAB1    |
| hsa-miR-655 | GADD45A | GADD45A | GADD45A |
| hsa-miR-655 | GDI2    | GDI2    | GDI2    |
| hsa-miR-655 | GLRA3   | GLRA3   | GLRA3   |
| hsa-miR-655 | GLRX5   | GLRX5   | GLRX5   |
| hsa-miR-655 | GLYATL2 | GLYATL2 | GLYATL2 |
| hsa-miR-655 | GMFB    | GMFB    | GMFB    |
| hsa-miR-655 | GNL3    | GNL3    | GNL3    |
| hsa-miR-655 | GNPAT   | GNPAT   | GNPAT   |
| hsa-miR-655 | GPBP1L1 | GPBP1L1 | GPBP1L1 |
| hsa-miR-655 | GPR128  | GPR128  | GPR128  |
| hsa-miR-655 | GPRIN3  | GPRIN3  | GPRIN3  |
| hsa-miR-655 | GRAMD1A | GRAMD1A | GRAMD1A |
| hsa-miR-655 | GRHL3   | GRHL3   | GRHL3   |
| hsa-miR-655 | GRIN2B  | GRIN2B  | GRIN2B  |
| hsa-miR-655 | GRINL1A | GRINL1A | GRINL1A |
| hsa-miR-655 | GRM2    | GRM2    | GRM2    |
| hsa-miR-655 | GSTA4   | GSTA4   | GSTA4   |
| hsa-miR-655 | GTF2F2  | GTF2F2  | GTF2F2  |
| hsa-miR-655 | GUCY1A2 | GUCY1A2 | GUCY1A2 |
| hsa-miR-655 | H2AFV   | H2AFV   | H2AFV   |
| hsa-miR-655 | HAO1    | HAO1    | HAO1    |
| hsa-miR-655 | HES1    | HES1    | HES1    |
| hsa-miR-655 | HEY2    | HEY2    | HEY2    |
| hsa-miR-655 | HLA-G   | HLA-G   | HLA-G   |
| hsa-miR-655 | HORMAD1 | HORMAD1 | HORMAD1 |
| hsa-miR-655 | HORMAD2 | HORMAD2 | HORMAD2 |
| hsa-miR-655 | HOXA2   | HOXA2   | HOXA2   |
| hsa-miR-655 | HOXC4   | HOXC4   | HOXC4   |
| hsa-miR-655 | HSPA14  | HSPA14  | HSPA14  |
| hsa-miR-655 | HSPB3   | HSPB3   | HSPB3   |
| hsa-miR-655 | HSPH1   | HSPH1   | HSPH1   |

|             |          |          |          |
|-------------|----------|----------|----------|
| hsa-miR-655 | ICT1     | ICT1     | ICT1     |
| hsa-miR-655 | IFNG     | IFNG     | IFNG     |
| hsa-miR-655 | IL20RA   | IL20RA   | IL20RA   |
| hsa-miR-655 | IL6      | IL6      | IL6      |
| hsa-miR-655 | IL7      | IL7      | IL7      |
| hsa-miR-655 | ING1     | ING1     | ING1     |
| hsa-miR-655 | ING2     | ING2     | ING2     |
| hsa-miR-655 | IRAK1BP1 | IRAK1BP1 | IRAK1BP1 |
| hsa-miR-655 | ITGB1    | ITGB1    | ITGB1    |
| hsa-miR-655 | ITPR1    | ITPR1    | ITPR1    |
| hsa-miR-655 | KCNA4    | KCNA4    | KCNA4    |
| hsa-miR-655 | KCNJ3    | KCNJ3    | KCNJ3    |
| hsa-miR-655 | KDEL2    | KDEL2    | KDEL2    |
| hsa-miR-655 | KIAA1826 | KIAA1826 | KIAA1826 |
| hsa-miR-655 | KIF20A   | KIF20A   | KIF20A   |
| hsa-miR-655 | KLB      | KLB      | KLB      |
| hsa-miR-655 | KRT12    | KRT12    | KRT12    |
| hsa-miR-655 | KRT4     | KRT4     | KRT4     |
| hsa-miR-655 | KTN1     | KTN1     | KTN1     |
| hsa-miR-655 | LPA      | LPA      | LPA      |
| hsa-miR-655 | LRRC34   | LRRC34   | LRRC34   |
| hsa-miR-655 | LRRC40   | LRRC40   | LRRC40   |
| hsa-miR-655 | LRRC7    | LRRC7    | LRRC7    |
| hsa-miR-655 | LTBP1    | LTBP1    | LTBP1    |
| hsa-miR-655 | LTV1     | LTV1     | LTV1     |
| hsa-miR-655 | LYZ      | LYZ      | LYZ      |
| hsa-miR-655 | MAPK9    | MAPK9    | MAPK9    |
| hsa-miR-655 | MARCKS   | MARCKS   | MARCKS   |
| hsa-miR-655 | MATR3    | MATR3    | MATR3    |
| hsa-miR-655 | MBNL3    | MBNL3    | MBNL3    |
| hsa-miR-655 | MBTPS1   | MBTPS1   | MBTPS1   |
| hsa-miR-655 | MCCC2    | MCCC2    | MCCC2    |
| hsa-miR-655 | MEIG1    | MEIG1    | MEIG1    |
| hsa-miR-655 | METTL8   | METTL8   | METTL8   |
| hsa-miR-655 | MGAT4A   | MGAT4A   | MGAT4A   |
| hsa-miR-655 | MGMT     | MGMT     | MGMT     |
| hsa-miR-655 | MITD1    | MITD1    | MITD1    |
| hsa-miR-655 | MKI67IP  | MKI67IP  | MKI67IP  |
| hsa-miR-655 | MMP10    | MMP10    | MMP10    |
| hsa-miR-655 | MRFAP1L1 | MRFAP1L1 | MRFAP1L1 |
| hsa-miR-655 | NBR1     | NBR1     | NBR1     |
| hsa-miR-655 | NDST2    | NDST2    | NDST2    |
| hsa-miR-655 | NDUFA1   | NDUFA1   | NDUFA1   |
| hsa-miR-655 | NEFM     | NEFM     | NEFM     |
| hsa-miR-655 | NETO1    | NETO1    | NETO1    |
| hsa-miR-655 | NEUROD1  | NEUROD1  | NEUROD1  |
| hsa-miR-655 | NEUROG2  | NEUROG2  | NEUROG2  |
| hsa-miR-655 | NFIL3    | NFIL3    | NFIL3    |
| hsa-miR-655 | NIPBL    | NIPBL    | NIPBL    |
| hsa-miR-655 | NPY5R    | NPY5R    | NPY5R    |
| hsa-miR-655 | OCA2     | OCA2     | OCA2     |

|             |         |         |         |
|-------------|---------|---------|---------|
| hsa-miR-655 | OCEL1   | OCEL1   | OCEL1   |
| hsa-miR-655 | OMD     | OMD     | OMD     |
| hsa-miR-655 | OPRM1   | OPRM1   | OPRM1   |
| hsa-miR-655 | OSBPL9  | OSBPL9  | OSBPL9  |
| hsa-miR-655 | OTUD1   | OTUD1   | OTUD1   |
| hsa-miR-655 | PABPN1  | PABPN1  | PABPN1  |
| hsa-miR-655 | PACSN3  | PACSN3  | PACSN3  |
| hsa-miR-655 | PAQR3   | PAQR3   | PAQR3   |
| hsa-miR-655 | PASK    | PASK    | PASK    |
| hsa-miR-655 | PAXIP1  | PAXIP1  | PAXIP1  |
| hsa-miR-655 | PCDH19  | PCDH19  | PCDH19  |
| hsa-miR-655 | PCDHA5  | PCDHA5  | PCDHA5  |
| hsa-miR-655 | PCDHB15 | PCDHB15 | PCDHB15 |
| hsa-miR-655 | PDHX    | PDHX    | PDHX    |
| hsa-miR-655 | PDSS2   | PDSS2   | PDSS2   |
| hsa-miR-655 | PHACTR3 | PHACTR3 | PHACTR3 |
| hsa-miR-655 | PHF12   | PHF12   | PHF12   |
| hsa-miR-655 | PIGW    | PIGW    | PIGW    |
| hsa-miR-655 | PLAU    | PLAU    | PLAU    |
| hsa-miR-655 | PLEKHA8 | PLEKHA8 | PLEKHA8 |
| hsa-miR-655 | PMPCB   | PMPCB   | PMPCB   |
| hsa-miR-655 | PMS1    | PMS1    | PMS1    |
| hsa-miR-655 | PNRC1   | PNRC1   | PNRC1   |
| hsa-miR-655 | POLK    | POLK    | POLK    |
| hsa-miR-655 | POP1    | POP1    | POP1    |
| hsa-miR-655 | PPA1    | PPA1    | PPA1    |
| hsa-miR-655 | PPFIA2  | PPFIA2  | PPFIA2  |
| hsa-miR-655 | PPM1B   | PPM1B   | PPM1B   |
| hsa-miR-655 | PRDX1   | PRDX1   | PRDX1   |
| hsa-miR-655 | PRKG2   | PRKG2   | PRKG2   |
| hsa-miR-655 | PRLHR   | PRLHR   | PRLHR   |
| hsa-miR-655 | PRPF4   | PRPF4   | PRPF4   |
| hsa-miR-655 | PRRX2   | PRRX2   | PRRX2   |
| hsa-miR-655 | PRSS35  | PRSS35  | PRSS35  |
| hsa-miR-655 | PSMA1   | PSMA1   | PSMA1   |
| hsa-miR-655 | PSMD7   | PSMD7   | PSMD7   |
| hsa-miR-655 | PTPLA   | PTPLA   | PTPLA   |
| hsa-miR-655 | PTPN14  | PTPN14  | PTPN14  |
| hsa-miR-655 | PTPRG   | PTPRG   | PTPRG   |
| hsa-miR-655 | PTPRQ   | PTPRQ   | PTPRQ   |
| hsa-miR-655 | PTTG1   | PTTG1   | PTTG1   |
| hsa-miR-655 | PTX3    | PTX3    | PTX3    |
| hsa-miR-655 | RAB20   | RAB20   | RAB20   |
| hsa-miR-655 | RAI1    | RAI1    | RAI1    |
| hsa-miR-655 | RALGPS2 | RALGPS2 | RALGPS2 |
| hsa-miR-655 | RANBP9  | RANBP9  | RANBP9  |
| hsa-miR-655 | RBBP6   | RBBP6   | RBBP6   |
| hsa-miR-655 | RBM26   | RBM26   | RBM26   |
| hsa-miR-655 | RFK     | RFK     | RFK     |
| hsa-miR-655 | RFPL1   | RFPL1   | RFPL1   |
| hsa-miR-655 | RFPL2   | RFPL2   | RFPL2   |

|             |          |          |          |
|-------------|----------|----------|----------|
| hsa-miR-655 | RFX4     | RFX4     | RFX4     |
| hsa-miR-655 | RGS1     | RGS1     | RGS1     |
| hsa-miR-655 | RGS13    | RGS13    | RGS13    |
| hsa-miR-655 | RGS4     | RGS4     | RGS4     |
| hsa-miR-655 | RGS7     | RGS7     | RGS7     |
| hsa-miR-655 | RNF130   | RNF130   | RNF130   |
| hsa-miR-655 | RRP9     | RRP9     | RRP9     |
| hsa-miR-655 | RUFY2    | RUFY2    | RUFY2    |
| hsa-miR-655 | SAMD12   | SAMD12   | SAMD12   |
| hsa-miR-655 | SAP30L   | SAP30L   | SAP30L   |
| hsa-miR-655 | SCOC     | SCOC     | SCOC     |
| hsa-miR-655 | SEC63    | SEC63    | SEC63    |
| hsa-miR-655 | SENP6    | SENP6    | SENP6    |
| hsa-miR-655 | SESN1    | SESN1    | SESN1    |
| hsa-miR-655 | SESTD1   | SESTD1   | SESTD1   |
| hsa-miR-655 | SETD2    | SETD2    | SETD2    |
| hsa-miR-655 | SETDB1   | SETDB1   | SETDB1   |
| hsa-miR-655 | SH3BGRL  | SH3BGRL  | SH3BGRL  |
| hsa-miR-655 | SKIL     | SKIL     | SKIL     |
| hsa-miR-655 | SKIV2L2  | SKIV2L2  | SKIV2L2  |
| hsa-miR-655 | SLC10A4  | SLC10A4  | SLC10A4  |
| hsa-miR-655 | SLC16A4  | SLC16A4  | SLC16A4  |
| hsa-miR-655 | SLC22A16 | SLC22A16 | SLC22A16 |
| hsa-miR-655 | SLC23A3  | SLC23A3  | SLC23A3  |
| hsa-miR-655 | SLC25A18 | SLC25A18 | SLC25A18 |
| hsa-miR-655 | SLC25A5  | SLC25A5  | SLC25A5  |
| hsa-miR-655 | SLC30A5  | SLC30A5  | SLC30A5  |
| hsa-miR-655 | SLC33A1  | SLC33A1  | SLC33A1  |
| hsa-miR-655 | SLC9A10  | SLC9A10  | SLC9A10  |
| hsa-miR-655 | SLCO1B3  | SLCO1B3  | SLCO1B3  |
| hsa-miR-655 | SLCO3A1  | SLCO3A1  | SLCO3A1  |
| hsa-miR-655 | SLITRK3  | SLITRK3  | SLITRK3  |
| hsa-miR-655 | SMEK2    | SMEK2    | SMEK2    |
| hsa-miR-655 | SMPDL3A  | SMPDL3A  | SMPDL3A  |
| hsa-miR-655 | SNRPB2   | SNRPB2   | SNRPB2   |
| hsa-miR-655 | SNRPC    | SNRPC    | SNRPC    |
| hsa-miR-655 | SNX10    | SNX10    | SNX10    |
| hsa-miR-655 | SNX16    | SNX16    | SNX16    |
| hsa-miR-655 | SOX15    | SOX15    | SOX15    |
| hsa-miR-655 | SOX2     | SOX2     | SOX2     |
| hsa-miR-655 | SOX30    | SOX30    | SOX30    |
| hsa-miR-655 | SPACA4   | SPACA4   | SPACA4   |
| hsa-miR-655 | SPAG7    | SPAG7    | SPAG7    |
| hsa-miR-655 | SPARCL1  | SPARCL1  | SPARCL1  |
| hsa-miR-655 | SRPK2    | SRPK2    | SRPK2    |
| hsa-miR-655 | SRRM1    | SRRM1    | SRRM1    |
| hsa-miR-655 | SSB      | SSB      | SSB      |
| hsa-miR-655 | SUCLG1   | SUCLG1   | SUCLG1   |
| hsa-miR-655 | SULT1E1  | SULT1E1  | SULT1E1  |
| hsa-miR-655 | SUMF1    | SUMF1    | SUMF1    |
| hsa-miR-655 | SUPT7L   | SUPT7L   | SUPT7L   |

|             |          |          |          |
|-------------|----------|----------|----------|
| hsa-miR-655 | SUV39H2  | SUV39H2  | SUV39H2  |
| hsa-miR-655 | SYCP3    | SYCP3    | SYCP3    |
| hsa-miR-655 | TAF1A    | TAF1A    | TAF1A    |
| hsa-miR-655 | TAGAP    | TAGAP    | TAGAP    |
| hsa-miR-655 | TAP2     | TAP2     | TAP2     |
| hsa-miR-655 | TBC1D3   | TBC1D3   | TBC1D3   |
| hsa-miR-655 | TBC1D3B  | TBC1D3B  | TBC1D3B  |
| hsa-miR-655 | TBC1D3C  | TBC1D3C  | TBC1D3C  |
| hsa-miR-655 | TBC1D3G  | TBC1D3G  | TBC1D3G  |
| hsa-miR-655 | TBC1D9   | TBC1D9   | TBC1D9   |
| hsa-miR-655 | TBX19    | TBX19    | TBX19    |
| hsa-miR-655 | TCF4     | TCF4     | TCF4     |
| hsa-miR-655 | TCF7L2   | TCF7L2   | TCF7L2   |
| hsa-miR-655 | TDRD9    | TDRD9    | TDRD9    |
| hsa-miR-655 | THAP5    | THAP5    | THAP5    |
| hsa-miR-655 | THOC3    | THOC3    | THOC3    |
| hsa-miR-655 | TLE4     | TLE4     | TLE4     |
| hsa-miR-655 | TLR8     | TLR8     | TLR8     |
| hsa-miR-655 | TLX3     | TLX3     | TLX3     |
| hsa-miR-655 | TMEM136  | TMEM136  | TMEM136  |
| hsa-miR-655 | TMEM14B  | TMEM14B  | TMEM14B  |
| hsa-miR-655 | TMEM42   | TMEM42   | TMEM42   |
| hsa-miR-655 | TMEM59   | TMEM59   | TMEM59   |
| hsa-miR-655 | TMEM65   | TMEM65   | TMEM65   |
| hsa-miR-655 | TNFAIP6  | TNFAIP6  | TNFAIP6  |
| hsa-miR-655 | TNPO1    | TNPO1    | TNPO1    |
| hsa-miR-655 | TOB1     | TOB1     | TOB1     |
| hsa-miR-655 | TOM1L1   | TOM1L1   | TOM1L1   |
| hsa-miR-655 | TPMT     | TPMT     | TPMT     |
| hsa-miR-655 | TRAF3IP1 | TRAF3IP1 | TRAF3IP1 |
| hsa-miR-655 | TRIM24   | TRIM24   | TRIM24   |
| hsa-miR-655 | TRPC4    | TRPC4    | TRPC4    |
| hsa-miR-655 | TTC15    | TTC15    | TTC15    |
| hsa-miR-655 | UBAP1    | UBAP1    | UBAP1    |
| hsa-miR-655 | UBAP2L   | UBAP2L   | UBAP2L   |
| hsa-miR-655 | UBE2E2   | UBE2E2   | UBE2E2   |
| hsa-miR-655 | UCHL3    | UCHL3    | UCHL3    |
| hsa-miR-655 | UCHL5    | UCHL5    | UCHL5    |
| hsa-miR-655 | UHRF1    | UHRF1    | UHRF1    |
| hsa-miR-655 | UPF3A    | UPF3A    | UPF3A    |
| hsa-miR-655 | USP28    | USP28    | USP28    |
| hsa-miR-655 | USP45    | USP45    | USP45    |
| hsa-miR-655 | UTP15    | UTP15    | UTP15    |
| hsa-miR-655 | VEGFC    | VEGFC    | VEGFC    |
| hsa-miR-655 | VTA1     | VTA1     | VTA1     |
| hsa-miR-655 | WDR20    | WDR20    | WDR20    |
| hsa-miR-655 | WDR3     | WDR3     | WDR3     |
| hsa-miR-655 | WDR44    | WDR44    | WDR44    |
| hsa-miR-655 | WDSUB1   | WDSUB1   | WDSUB1   |
| hsa-miR-655 | WIPF1    | WIPF1    | WIPF1    |
| hsa-miR-655 | XKR9     | XKR9     | XKR9     |

|             |          |          |          |
|-------------|----------|----------|----------|
| hsa-miR-655 | ZC3HC1   | ZC3HC1   | ZC3HC1   |
| hsa-miR-655 | ZCCHC13  | ZCCHC13  | ZCCHC13  |
| hsa-miR-655 | ZDHHC9   | ZDHHC9   | ZDHHC9   |
| hsa-miR-655 | ZIC2     | ZIC2     | ZIC2     |
| hsa-miR-655 | ZNF23    | ZNF23    | ZNF23    |
| hsa-miR-655 | ZNF281   | ZNF281   | ZNF281   |
| hsa-miR-655 | ZNF302   | ZNF302   | ZNF302   |
| hsa-miR-655 | ZNF326   | ZNF326   | ZNF326   |
| hsa-miR-655 | ZNF334   | ZNF334   | ZNF334   |
| hsa-miR-655 | ZNF350   | ZNF350   | ZNF350   |
| hsa-miR-655 | ZNF420   | ZNF420   | ZNF420   |
| hsa-miR-655 | ZNF423   | ZNF423   | ZNF423   |
| hsa-miR-655 | ZNF441   | ZNF441   | ZNF441   |
| hsa-miR-655 | ZNF493   | ZNF493   | ZNF493   |
| hsa-miR-655 | ZNF521   | ZNF521   | ZNF521   |
| hsa-miR-655 | ZNF595   | ZNF595   | ZNF595   |
| hsa-miR-655 | ZNF695   | ZNF695   | ZNF695   |
| hsa-miR-655 | ZNF77    | ZNF77    | ZNF77    |
| hsa-miR-655 | ZRANB3   | ZRANB3   | ZRANB3   |
| hsa-miR-656 | AASS     | AASS     | AASS     |
| hsa-miR-656 | ABCC10   | ABCC10   | ABCC10   |
| hsa-miR-656 | ABCE1    | ABCE1    | ABCE1    |
| hsa-miR-656 | ABHD3    | ABHD3    | ABHD3    |
| hsa-miR-656 | ACAA2    | ACAA2    | ACAA2    |
| hsa-miR-656 | ALDH1L2  | ALDH1L2  | ALDH1L2  |
| hsa-miR-656 | ANAPC10  | ANAPC10  | ANAPC10  |
| hsa-miR-656 | ANKRD37  | ANKRD37  | ANKRD37  |
| hsa-miR-656 | ANKRD44  | ANKRD44  | ANKRD44  |
| hsa-miR-656 | ANKRD6   | ANKRD6   | ANKRD6   |
| hsa-miR-656 | ANKRD7   | ANKRD7   | ANKRD7   |
| hsa-miR-656 | ANXA7    | ANXA7    | ANXA7    |
| hsa-miR-656 | APAF1    | APAF1    | APAF1    |
| hsa-miR-656 | AQR      | AQR      | AQR      |
| hsa-miR-656 | ARHGAP6  | ARHGAP6  | ARHGAP6  |
| hsa-miR-656 | ARHGEF1  | ARHGEF1  | ARHGEF1  |
| hsa-miR-656 | ARSJ     | ARSJ     | ARSJ     |
| hsa-miR-656 | ASH2L    | ASH2L    | ASH2L    |
| hsa-miR-656 | ATP6AP2  | ATP6AP2  | ATP6AP2  |
| hsa-miR-656 | ATR      | ATR      | ATR      |
| hsa-miR-656 | BAI3     | BAI3     | BAI3     |
| hsa-miR-656 | BCAS2    | BCAS2    | BCAS2    |
| hsa-miR-656 | BTLA     | BTLA     | BTLA     |
| hsa-miR-656 | C10orf96 | C10orf96 | C10orf96 |
| hsa-miR-656 | C13orf15 | C13orf15 | C13orf15 |
| hsa-miR-656 | C1orf110 | C1orf110 | C1orf110 |
| hsa-miR-656 | C1orf146 | C1orf146 | C1orf146 |
| hsa-miR-656 | C6orf162 | C6orf162 | C6orf162 |
| hsa-miR-656 | C9orf84  | C9orf84  | C9orf84  |
| hsa-miR-656 | CADM4    | CADM4    | CADM4    |
| hsa-miR-656 | CALCRL   | CALCRL   | CALCRL   |
| hsa-miR-656 | CBWD2    | CBWD2    | CBWD2    |



|             |           |           |           |
|-------------|-----------|-----------|-----------|
| hsa-miR-656 | CCAR1     | CCAR1     | CCAR1     |
| hsa-miR-656 | CCDC64    | CCDC64    | CCDC64    |
| hsa-miR-656 | CCL8      | CCL8      | CCL8      |
| hsa-miR-656 | CCNA1     | CCNA1     | CCNA1     |
| hsa-miR-656 | CCNC      | CCNC      | CCNC      |
| hsa-miR-656 | CD36      | CD36      | CD36      |
| hsa-miR-656 | CDC73     | CDC73     | CDC73     |
| hsa-miR-656 | CDH11     | CDH11     | CDH11     |
| hsa-miR-656 | CENPK     | CENPK     | CENPK     |
| hsa-miR-656 | CHST2     | CHST2     | CHST2     |
| hsa-miR-656 | CHST7     | CHST7     | CHST7     |
| hsa-miR-656 | CHUK      | CHUK      | CHUK      |
| hsa-miR-656 | CNOT6L    | CNOT6L    | CNOT6L    |
| hsa-miR-656 | CPSF6     | CPSF6     | CPSF6     |
| hsa-miR-656 | CTLA4     | CTLA4     | CTLA4     |
| hsa-miR-656 | CUL4B     | CUL4B     | CUL4B     |
| hsa-miR-656 | CYP26A1   | CYP26A1   | CYP26A1   |
| hsa-miR-656 | CYP7B1    | CYP7B1    | CYP7B1    |
| hsa-miR-656 | CYorf15B  | CYorf15B  | CYorf15B  |
| hsa-miR-656 | DCHS2     | DCHS2     | DCHS2     |
| hsa-miR-656 | DET1      | DET1      | DET1      |
| hsa-miR-656 | DGKG      | DGKG      | DGKG      |
| hsa-miR-656 | DMRT3     | DMRT3     | DMRT3     |
| hsa-miR-656 | DNAJA1    | DNAJA1    | DNAJA1    |
| hsa-miR-656 | DPY19L4   | DPY19L4   | DPY19L4   |
| hsa-miR-656 | DPYD      | DPYD      | DPYD      |
| hsa-miR-656 | DR1       | DR1       | DR1       |
| hsa-miR-656 | EDA2R     | EDA2R     | EDA2R     |
| hsa-miR-656 | EIF2AK4   | EIF2AK4   | EIF2AK4   |
| hsa-miR-656 | EIF4E     | EIF4E     | EIF4E     |
| hsa-miR-656 | EVI5      | EVI5      | EVI5      |
| hsa-miR-656 | EXOC1     | EXOC1     | EXOC1     |
| hsa-miR-656 | FAM104B   | FAM104B   | FAM104B   |
| hsa-miR-656 | FAM48A    | FAM48A    | FAM48A    |
| hsa-miR-656 | FAM96A    | FAM96A    | FAM96A    |
| hsa-miR-656 | FBXL4     | FBXL4     | FBXL4     |
| hsa-miR-656 | FBXO34    | FBXO34    | FBXO34    |
| hsa-miR-656 | FBXO36    | FBXO36    | FBXO36    |
| hsa-miR-656 | FCGRT     | FCGRT     | FCGRT     |
| hsa-miR-656 | FGG       | FGG       | FGG       |
| hsa-miR-656 | FPGT      | FPGT      | FPGT      |
| hsa-miR-656 | FRMD6     | FRMD6     | FRMD6     |
| hsa-miR-656 | G3BP1     | G3BP1     | G3BP1     |
| hsa-miR-656 | GABARAPL2 | GABARAPL2 | GABARAPL2 |
| hsa-miR-656 | GAPVD1    | GAPVD1    | GAPVD1    |
| hsa-miR-656 | GCM2      | GCM2      | GCM2      |
| hsa-miR-656 | GCSH      | GCSH      | GCSH      |
| hsa-miR-656 | GDAP2     | GDAP2     | GDAP2     |
| hsa-miR-656 | GEMIN5    | GEMIN5    | GEMIN5    |
| hsa-miR-656 | GIMAP2    | GIMAP2    | GIMAP2    |
| hsa-miR-656 | GOSR1     | GOSR1     | GOSR1     |

|             |         |         |         |
|-------------|---------|---------|---------|
| hsa-miR-656 | GTPBP4  | GTPBP4  | GTPBP4  |
| hsa-miR-656 | H2AFY2  | H2AFY2  | H2AFY2  |
| hsa-miR-656 | HBP1    | HBP1    | HBP1    |
| hsa-miR-656 | HEY1    | HEY1    | HEY1    |
| hsa-miR-656 | HLA-F   | HLA-F   | HLA-F   |
| hsa-miR-656 | HNMT    | HNMT    | HNMT    |
| hsa-miR-656 | HRH4    | HRH4    | HRH4    |
| hsa-miR-656 | HRSP12  | HRSP12  | HRSP12  |
| hsa-miR-656 | HSD17B7 | HSD17B7 | HSD17B7 |
| hsa-miR-656 | HSPBAP1 | HSPBAP1 | HSPBAP1 |
| hsa-miR-656 | HTATSF1 | HTATSF1 | HTATSF1 |
| hsa-miR-656 | ID4     | ID4     | ID4     |
| hsa-miR-656 | IL16    | IL16    | IL16    |
| hsa-miR-656 | INTU    | INTU    | INTU    |
| hsa-miR-656 | IQCG    | IQCG    | IQCG    |
| hsa-miR-656 | IRX4    | IRX4    | IRX4    |
| hsa-miR-656 | ITM2B   | ITM2B   | ITM2B   |
| hsa-miR-656 | JAK1    | JAK1    | JAK1    |
| hsa-miR-656 | JUNB    | JUNB    | JUNB    |
| hsa-miR-656 | KLF2    | KLF2    | KLF2    |
| hsa-miR-656 | KLRC4   | KLRC4   | KLRC4   |
| hsa-miR-656 | KRIT1   | KRIT1   | KRIT1   |
| hsa-miR-656 | KRT5    | KRT5    | KRT5    |
| hsa-miR-656 | LAMA2   | LAMA2   | LAMA2   |
| hsa-miR-656 | LIG4    | LIG4    | LIG4    |
| hsa-miR-656 | LMBRD2  | LMBRD2  | LMBRD2  |
| hsa-miR-656 | LONRF3  | LONRF3  | LONRF3  |
| hsa-miR-656 | LRP5L   | LRP5L   | LRP5L   |
| hsa-miR-656 | LRRC7   | LRRC7   | LRRC7   |
| hsa-miR-656 | LRRC8D  | LRRC8D  | LRRC8D  |
| hsa-miR-656 | MAGEB10 | MAGEB10 | MAGEB10 |
| hsa-miR-656 | MAGEB6  | MAGEB6  | MAGEB6  |
| hsa-miR-656 | MAGEE2  | MAGEE2  | MAGEE2  |
| hsa-miR-656 | MAGI1   | MAGI1   | MAGI1   |
| hsa-miR-656 | MAP2    | MAP2    | MAP2    |
| hsa-miR-656 | MARK3   | MARK3   | MARK3   |
| hsa-miR-656 | MFHAS1  | MFHAS1  | MFHAS1  |
| hsa-miR-656 | MFN2    | MFN2    | MFN2    |
| hsa-miR-656 | MIPOL1  | MIPOL1  | MIPOL1  |
| hsa-miR-656 | MKLN1   | MKLN1   | MKLN1   |
| hsa-miR-656 | MLH3    | MLH3    | MLH3    |
| hsa-miR-656 | MMP12   | MMP12   | MMP12   |
| hsa-miR-656 | MNAT1   | MNAT1   | MNAT1   |
| hsa-miR-656 | MS4A6A  | MS4A6A  | MS4A6A  |
| hsa-miR-656 | MS4A6E  | MS4A6E  | MS4A6E  |
| hsa-miR-656 | MSX1    | MSX1    | MSX1    |
| hsa-miR-656 | MYBPC1  | MYBPC1  | MYBPC1  |
| hsa-miR-656 | MYO1B   | MYO1B   | MYO1B   |
| hsa-miR-656 | MYOT    | MYOT    | MYOT    |
| hsa-miR-656 | NAP1L3  | NAP1L3  | NAP1L3  |
| hsa-miR-656 | NCAPG2  | NCAPG2  | NCAPG2  |

|             |          |          |          |
|-------------|----------|----------|----------|
| hsa-miR-656 | NDUFA2   | NDUFA2   | NDUFA2   |
| hsa-miR-656 | NEDD1    | NEDD1    | NEDD1    |
| hsa-miR-656 | NEIL2    | NEIL2    | NEIL2    |
| hsa-miR-656 | NEIL3    | NEIL3    | NEIL3    |
| hsa-miR-656 | NEK1     | NEK1     | NEK1     |
| hsa-miR-656 | NETO1    | NETO1    | NETO1    |
| hsa-miR-656 | NEUROG2  | NEUROG2  | NEUROG2  |
| hsa-miR-656 | NFU1     | NFU1     | NFU1     |
| hsa-miR-656 | NPY5R    | NPY5R    | NPY5R    |
| hsa-miR-656 | NT5C3    | NT5C3    | NT5C3    |
| hsa-miR-656 | NTS      | NTS      | NTS      |
| hsa-miR-656 | NUDT3    | NUDT3    | NUDT3    |
| hsa-miR-656 | NXT2     | NXT2     | NXT2     |
| hsa-miR-656 | ODAM     | ODAM     | ODAM     |
| hsa-miR-656 | OIP5     | OIP5     | OIP5     |
| hsa-miR-656 | OIT3     | OIT3     | OIT3     |
| hsa-miR-656 | OLFML2B  | OLFML2B  | OLFML2B  |
| hsa-miR-656 | PAGE2B   | PAGE2B   | PAGE2B   |
| hsa-miR-656 | PAK1     | PAK1     | PAK1     |
| hsa-miR-656 | PAK1IP1  | PAK1IP1  | PAK1IP1  |
| hsa-miR-656 | PCDH19   | PCDH19   | PCDH19   |
| hsa-miR-656 | PCSK5    | PCSK5    | PCSK5    |
| hsa-miR-656 | PDC      | PDC      | PDC      |
| hsa-miR-656 | PDE9A    | PDE9A    | PDE9A    |
| hsa-miR-656 | PDIA6    | PDIA6    | PDIA6    |
| hsa-miR-656 | PEX1     | PEX1     | PEX1     |
| hsa-miR-656 | PGM2     | PGM2     | PGM2     |
| hsa-miR-656 | PHTF2    | PHTF2    | PHTF2    |
| hsa-miR-656 | PIGK     | PIGK     | PIGK     |
| hsa-miR-656 | PLCL2    | PLCL2    | PLCL2    |
| hsa-miR-656 | PNLIPRP3 | PNLIPRP3 | PNLIPRP3 |
| hsa-miR-656 | PNPT1    | PNPT1    | PNPT1    |
| hsa-miR-656 | PRDM5    | PRDM5    | PRDM5    |
| hsa-miR-656 | PREPL    | PREPL    | PREPL    |
| hsa-miR-656 | PRKCI    | PRKCI    | PRKCI    |
| hsa-miR-656 | PRKG1    | PRKG1    | PRKG1    |
| hsa-miR-656 | PROCR    | PROCR    | PROCR    |
| hsa-miR-656 | PSTK     | PSTK     | PSTK     |
| hsa-miR-656 | PTPRK    | PTPRK    | PTPRK    |
| hsa-miR-656 | PTPRR    | PTPRR    | PTPRR    |
| hsa-miR-656 | PTS      | PTS      | PTS      |
| hsa-miR-656 | RAI2     | RAI2     | RAI2     |
| hsa-miR-656 | RAP1A    | RAP1A    | RAP1A    |
| hsa-miR-656 | RAPGEF4  | RAPGEF4  | RAPGEF4  |
| hsa-miR-656 | RBM26    | RBM26    | RBM26    |
| hsa-miR-656 | RBM3     | RBM3     | RBM3     |
| hsa-miR-656 | RHBDF2   | RHBDF2   | RHBDF2   |
| hsa-miR-656 | RHOBTB3  | RHOBTB3  | RHOBTB3  |
| hsa-miR-656 | RLF      | RLF      | RLF      |
| hsa-miR-656 | RLN2     | RLN2     | RLN2     |
| hsa-miR-656 | RMI1     | RMI1     | RMI1     |

|             |          |          |          |
|-------------|----------|----------|----------|
| hsa-miR-656 | RNF111   | RNF111   | RNF111   |
| hsa-miR-656 | RNF180   | RNF180   | RNF180   |
| hsa-miR-656 | RNF212   | RNF212   | RNF212   |
| hsa-miR-656 | RNMT     | RNMT     | RNMT     |
| hsa-miR-656 | RUFY2    | RUFY2    | RUFY2    |
| hsa-miR-656 | RXRG     | RXRG     | RXRG     |
| hsa-miR-656 | S100A2   | S100A2   | S100A2   |
| hsa-miR-656 | SAMD8    | SAMD8    | SAMD8    |
| hsa-miR-656 | SBDS     | SBDS     | SBDS     |
| hsa-miR-656 | SCAP     | SCAP     | SCAP     |
| hsa-miR-656 | SCEL     | SCEL     | SCEL     |
| hsa-miR-656 | SDPR     | SDPR     | SDPR     |
| hsa-miR-656 | SEH1L    | SEH1L    | SEH1L    |
| hsa-miR-656 | SERPINA7 | SERPINA7 | SERPINA7 |
| hsa-miR-656 | SERPINI1 | SERPINI1 | SERPINI1 |
| hsa-miR-656 | SGIP1    | SGIP1    | SGIP1    |
| hsa-miR-656 | SLC23A1  | SLC23A1  | SLC23A1  |
| hsa-miR-656 | SLC25A31 | SLC25A31 | SLC25A31 |
| hsa-miR-656 | SLC25A5  | SLC25A5  | SLC25A5  |
| hsa-miR-656 | SLC35A3  | SLC35A3  | SLC35A3  |
| hsa-miR-656 | SLC35D3  | SLC35D3  | SLC35D3  |
| hsa-miR-656 | SLC46A3  | SLC46A3  | SLC46A3  |
| hsa-miR-656 | SLCO1B3  | SLCO1B3  | SLCO1B3  |
| hsa-miR-656 | SNRPA1   | SNRPA1   | SNRPA1   |
| hsa-miR-656 | SPACA1   | SPACA1   | SPACA1   |
| hsa-miR-656 | SPARCL1  | SPARCL1  | SPARCL1  |
| hsa-miR-656 | SPO11    | SPO11    | SPO11    |
| hsa-miR-656 | SPTLC1   | SPTLC1   | SPTLC1   |
| hsa-miR-656 | SRFBP1   | SRFBP1   | SRFBP1   |
| hsa-miR-656 | SRP14    | SRP14    | SRP14    |
| hsa-miR-656 | ST8SIA1  | ST8SIA1  | ST8SIA1  |
| hsa-miR-656 | SULT1B1  | SULT1B1  | SULT1B1  |
| hsa-miR-656 | SUV39H2  | SUV39H2  | SUV39H2  |
| hsa-miR-656 | SVEP1    | SVEP1    | SVEP1    |
| hsa-miR-656 | TBX22    | TBX22    | TBX22    |
| hsa-miR-656 | TCEAL2   | TCEAL2   | TCEAL2   |
| hsa-miR-656 | TCF4     | TCF4     | TCF4     |
| hsa-miR-656 | TDRD7    | TDRD7    | TDRD7    |
| hsa-miR-656 | TDRKH    | TDRKH    | TDRKH    |
| hsa-miR-656 | THEG     | THEG     | THEG     |
| hsa-miR-656 | TM7SF3   | TM7SF3   | TM7SF3   |
| hsa-miR-656 | TMEM22   | TMEM22   | TMEM22   |
| hsa-miR-656 | TMEM41B  | TMEM41B  | TMEM41B  |
| hsa-miR-656 | TMEM64   | TMEM64   | TMEM64   |
| hsa-miR-656 | TMEM67   | TMEM67   | TMEM67   |
| hsa-miR-656 | TMEM69   | TMEM69   | TMEM69   |
| hsa-miR-656 | TNR      | TNR      | TNR      |
| hsa-miR-656 | TPST1    | TPST1    | TPST1    |
| hsa-miR-656 | TRIM61   | TRIM61   | TRIM61   |
| hsa-miR-656 | TRIM69   | TRIM69   | TRIM69   |
| hsa-miR-656 | TROVE2   | TROVE2   | TROVE2   |

|                |          |          |          |
|----------------|----------|----------|----------|
| hsa-miR-656    | TRPA1    | TRPA1    | TRPA1    |
| hsa-miR-656    | TSG101   | TSG101   | TSG101   |
| hsa-miR-656    | TTC29    | TTC29    | TTC29    |
| hsa-miR-656    | TTC8     | TTC8     | TTC8     |
| hsa-miR-656    | UAP1     | UAP1     | UAP1     |
| hsa-miR-656    | UBE2H    | UBE2H    | UBE2H    |
| hsa-miR-656    | USP33    | USP33    | USP33    |
| hsa-miR-656    | USPL1    | USPL1    | USPL1    |
| hsa-miR-656    | UTP18    | UTP18    | UTP18    |
| hsa-miR-656    | UTP20    | UTP20    | UTP20    |
| hsa-miR-656    | VPREB3   | VPREB3   | VPREB3   |
| hsa-miR-656    | WDR43    | WDR43    | WDR43    |
| hsa-miR-656    | WDR65    | WDR65    | WDR65    |
| hsa-miR-656    | WIF1     | WIF1     | WIF1     |
| hsa-miR-656    | WNT7A    | WNT7A    | WNT7A    |
| hsa-miR-656    | ZC3H14   | ZC3H14   | ZC3H14   |
| hsa-miR-656    | ZCCHC6   | ZCCHC6   | ZCCHC6   |
| hsa-miR-656    | ZDHHC20  | ZDHHC20  | ZDHHC20  |
| hsa-miR-656    | ZFP36    | ZFP36    | ZFP36    |
| hsa-miR-656    | ZMYND12  | ZMYND12  | ZMYND12  |
| hsa-miR-656    | ZNF131   | ZNF131   | ZNF131   |
| hsa-miR-656    | ZNF193   | ZNF193   | ZNF193   |
| hsa-miR-656    | ZNF333   | ZNF333   | ZNF333   |
| hsa-miR-656    | ZNF804A  | ZNF804A  | ZNF804A  |
| hsa-miR-876-3p | GLI3     | GLI3     | GLI3     |
| hsa-miR-876-3p | HEY1     | HEY1     | HEY1     |
| hsa-miR-876-3p | PPP1CC   | PPP1CC   | PPP1CC   |
| hsa-miR-876-3p | PPP1R12A | PPP1R12A | PPP1R12A |
| hsa-miR-876-3p | SLC41A2  | SLC41A2  | SLC41A2  |
| hsa-miR-876-3p | SNX2     | SNX2     | SNX2     |
